# Supplementary material for: Landscape of histone modifications in a sponge reveals the origin of animal cis-regulatory complexity
Source: eLife. 2017 Apr 11;6:e22194. doi: 10.7554/eLife.22194 (PMC5429095; doi:10.7554/eLife.22194)
Supplement: Figure 1—source data 1. — DOI: http://dx.doi.org/10.7554/eLife.22194.004 [file elife-22194-fig1-data1.xlsx]

## Sheet: Figure 1-Source Data 1
Figure 1-source data 1. Histone H3 covalent post-translation modifications and RNA Polymerase II investigated in this study and their typical genomic localization relative to coding genes and regulatory regions in bilaterian model organisms.
Histone H3 PTM	Genomic Localization
monomethylated histone H3 at lysine 4 (H3K4me1)	Distal cis-regulatory sites
trimethylated histone H3 at lysine 4 (H3K4me3)	Active proximal promoters
trimethylated histone H3 at lysine 36 (H3K36me3)	Actively transcribed regions
trimethylated histone H3 at lysine 27 (H3K27me3)	Polycomb-repressed regions
acetylated histone H3 at lysine 27 (H3K27ac)	Activated regulatory regions
total histone H3 (panH3)	Nucleosome positioning
RNAPII (8WG16)	Active transcription
