# Supplementary material for: Landscape of histone modifications in a sponge reveals the origin of animal cis-regulatory complexity
Source: eLife. 2017 Apr 11;6:e22194. doi: 10.7554/eLife.22194 (PMC5429095; doi:10.7554/eLife.22194)
Supplement: Figure 1—source data 3. — DOI: http://dx.doi.org/10.7554/eLife.22194.006 [file elife-22194-fig1-data3.xlsx]

## Sheet: Figure 1-Source Data 3
Figure 1-source data 3. BLASTp search outcome of the relevant histone methyltransferases and acetyltransferases against Amphimedon queenslandica proteins (NCBI nr database; E-value <1e-09).
# blastp
# Iteration: 0
# Query: Query_319289 sp|Q03164|KMT2A_HUMAN Histone-lysine N-methyltransferase 2A OS=Homo sapiens GN=KMT2A PE=1 SV=5
# RID: WZ1K1FSR014
# Database: nr
# Fields: query id, subject ids, % identity, % positives, alignment length, mismatches, gap opens, q. start, q. end, s. start, s. end, evalue, bit score
# 12 hits found
sp|Q03164|KMT2A_HUMAN	gi|761914854|ref|XP_011406498.1|	46.302	65.59	311	153	5	3671	3969	860	1168	4.5e-77	281
sp|Q03164|KMT2A_HUMAN	gi|761914854|ref|XP_011406498.1|	49.451	63.74	182	88	3	1869	2046	504	685	1.05e-42	172
sp|Q03164|KMT2A_HUMAN	gi|761914854|ref|XP_011406498.1|	36.697	51.38	109	56	1	1491	1586	253	361	5.48e-14	78.2
sp|Q03164|KMT2A_HUMAN	gi|761920338|ref|XP_011409063.1|	52.695	69.46	167	71	4	3772	3931	51	216	7.83e-50	176
sp|Q03164|KMT2A_HUMAN	gi|761906267|ref|XP_011402833.1|	49.689	66.46	161	78	2	3810	3969	254	412	1.36e-43	165
sp|Q03164|KMT2A_HUMAN	gi|761905007|ref|XP_011410525.1|	36.154	56.15	130	81	2	3840	3968	787	915	5.88e-19	94.4
sp|Q03164|KMT2A_HUMAN	gi|761914899|ref|XP_003389507.2|	35.714	52.6	154	81	7	3831	3968	787	938	5.78e-16	84.3
sp|Q03164|KMT2A_HUMAN	gi|761919506|ref|XP_011408670.1|	32.515	45.4	163	96	5	3819	3968	80	241	5.01e-13	70.9
sp|Q03164|KMT2A_HUMAN	gi|761919523|ref|XP_011408679.1|	35.2	48.8	125	63	5	1864	1977	442	559	1.25e-12	72.8
sp|Q03164|KMT2A_HUMAN	gi|761901548|ref|XP_011404932.1|	36.283	50.44	113	55	4	1864	1966	208	313	3.48e-12	70.1
sp|Q03164|KMT2A_HUMAN	gi|761914126|ref|XP_011406165.1|	31.288	42.33	163	98	4	3819	3968	1679	1840	5.86e-12	71.6
sp|Q03164|KMT2A_HUMAN	gi|761921176|ref|XP_011409464.1|	36.792	50.94	106	50	4	1864	1959	117	215	4.99e-11	64.7
# blastp
# Iteration: 0
# Query: Query_319290 sp|O15047|SET1A_HUMAN Histone-lysine N-methyltransferase SETD1A OS=Homo sapiens GN=SETD1A PE=1 SV=3
# RID: WZ1K1FSR014
# Database: nr
# Fields: query id, subject ids, % identity, % positives, alignment length, mismatches, gap opens, q. start, q. end, s. start, s. end, evalue, bit score
# 7 hits found
sp|O15047|SET1A_HUMAN	gi|761906267|ref|XP_011402833.1|	47.44	61.43	293	136	4	1420	1707	133	412	1.22e-70	242
sp|O15047|SET1A_HUMAN	gi|761914854|ref|XP_011406498.1|	53.383	71.43	133	61	1	1575	1707	1037	1168	2.9e-39	159
sp|O15047|SET1A_HUMAN	gi|761920338|ref|XP_011409063.1|	47.423	68.04	97	48	3	1575	1670	121	215	6.84e-23	97.8
sp|O15047|SET1A_HUMAN	gi|761905007|ref|XP_011410525.1|	37.5	56.25	128	79	1	1580	1706	788	915	1.02e-19	95.5
sp|O15047|SET1A_HUMAN	gi|761914899|ref|XP_003389507.2|	33.566	50.35	143	77	4	1580	1706	798	938	8.63e-16	82.4
sp|O15047|SET1A_HUMAN	gi|761906269|ref|XP_011402834.1|	30.723	48.8	166	102	4	19	180	32	188	5.49e-13	73.2
sp|O15047|SET1A_HUMAN	gi|761909981|ref|XP_011404358.1|	31.111	55.56	90	55	2	1624	1706	972	1061	5.4e-10	63.5
# blastp
# Iteration: 0
# Query: Query_319291 sp|Q9NR48|ASH1L_HUMAN Histone-lysine N-methyltransferase ASH1L OS=Homo sapiens GN=ASH1L PE=1 SV=2
# RID: WZ1K1FSR014
# Database: nr
# Fields: query id, subject ids, % identity, % positives, alignment length, mismatches, gap opens, q. start, q. end, s. start, s. end, evalue, bit score
# 8 hits found
sp|Q9NR48|ASH1L_HUMAN	gi|761905007|ref|XP_011410525.1|	41.284	58.72	218	122	4	2074	2290	709	921	1.25e-43	174
sp|Q9NR48|ASH1L_HUMAN	gi|761914899|ref|XP_003389507.2|	34.104	50.87	173	97	7	2127	2284	768	938	3.13e-20	97.8
sp|Q9NR48|ASH1L_HUMAN	gi|761906267|ref|XP_011402833.1|	37.405	56.49	131	75	4	2157	2284	285	411	5.48e-20	94.4
sp|Q9NR48|ASH1L_HUMAN	gi|761914854|ref|XP_011406498.1|	37.037	57.04	135	77	4	2150	2281	1035	1164	3.42e-18	91.3
sp|Q9NR48|ASH1L_HUMAN	gi|761911186|ref|XP_011404891.1|	31.944	50	144	89	4	2072	2208	46	187	3.84e-15	75.5
sp|Q9NR48|ASH1L_HUMAN	gi|761903794|ref|XP_011410041.1|	38.202	58.43	89	50	2	2719	2802	775	863	6.65e-12	70.9
sp|Q9NR48|ASH1L_HUMAN	gi|761903794|ref|XP_011410041.1|	34.021	53.61	97	64	0	2701	2797	980	1076	2.69e-11	68.9
sp|Q9NR48|ASH1L_HUMAN	gi|340377891|ref|XP_003387462.1|	52.083	64.58	48	21	1	2583	2628	649	696	1.97e-10	65.9
# blastp
# Iteration: 0
# Query: Query_319292 sp|Q9UPS6|SET1B_HUMAN Histone-lysine N-methyltransferase SETD1B OS=Homo sapiens GN=SETD1B PE=1 SV=3
# RID: WZ1K1FSR014
# Database: nr
# Fields: query id, subject ids, % identity, % positives, alignment length, mismatches, gap opens, q. start, q. end, s. start, s. end, evalue, bit score
# 9 hits found
sp|Q9UPS6|SET1B_HUMAN	gi|761906267|ref|XP_011402833.1|	51.839	64.21	299	129	4	1669	1966	128	412	1.02e-77	263
sp|Q9UPS6|SET1B_HUMAN	gi|761914854|ref|XP_011406498.1|	59.398	72.93	133	53	1	1834	1966	1037	1168	5.53e-44	174
sp|Q9UPS6|SET1B_HUMAN	gi|761920338|ref|XP_011409063.1|	52.577	70.1	97	43	3	1834	1929	121	215	1.79e-26	108
sp|Q9UPS6|SET1B_HUMAN	gi|761905007|ref|XP_011410525.1|	38.281	59.38	128	78	1	1839	1965	788	915	1.07e-21	102
sp|Q9UPS6|SET1B_HUMAN	gi|761914899|ref|XP_003389507.2|	33.566	50.35	143	77	4	1839	1965	798	938	3.3e-16	84
sp|Q9UPS6|SET1B_HUMAN	gi|761906269|ref|XP_011402834.1|	31.481	51.85	162	103	3	31	189	32	188	4.75e-16	83.2
sp|Q9UPS6|SET1B_HUMAN	gi|761909981|ref|XP_011404358.1|	36.667	56.67	90	50	2	1883	1965	972	1061	5.36e-12	70.5
sp|Q9UPS6|SET1B_HUMAN	gi|761919506|ref|XP_011408670.1|	31.469	46.15	143	77	4	1840	1965	103	241	4.48e-11	64.3
sp|Q9UPS6|SET1B_HUMAN	gi|761914126|ref|XP_011406165.1|	32.374	44.6	139	81	3	1840	1965	1702	1840	5.35e-10	63.9
# blastp
# Iteration: 0
# Query: Query_319293 sp|Q9BYW2|SETD2_HUMAN Histone-lysine N-methyltransferase SETD2 OS=Homo sapiens GN=SETD2 PE=1 SV=3
# RID: WZ1K1FSR014
# Database: nr
# Fields: query id, subject ids, % identity, % positives, alignment length, mismatches, gap opens, q. start, q. end, s. start, s. end, evalue, bit score
# 10 hits found
sp|Q9BYW2|SETD2_HUMAN	gi|761905007|ref|XP_011410525.1|	38.258	54.17	264	135	6	1473	1727	709	953	1.29e-46	183
sp|Q9BYW2|SETD2_HUMAN	gi|761911186|ref|XP_011404891.1|	52.817	65.49	142	65	1	1473	1614	48	187	3.05e-44	159
sp|Q9BYW2|SETD2_HUMAN	gi|761911184|ref|XP_011404890.1|	41.975	59.88	162	94	0	2394	2555	424	585	1.32e-32	135
sp|Q9BYW2|SETD2_HUMAN	gi|761911184|ref|XP_011404890.1|	39.37	63.78	127	68	3	1710	1829	12	136	1.58e-20	97.8
sp|Q9BYW2|SETD2_HUMAN	gi|761906267|ref|XP_011402833.1|	35.938	56.25	128	81	1	1562	1689	285	411	1.29e-22	102
sp|Q9BYW2|SETD2_HUMAN	gi|761914899|ref|XP_003389507.2|	35.393	48.88	178	101	6	1526	1689	761	938	2.15e-22	104
sp|Q9BYW2|SETD2_HUMAN	gi|761914854|ref|XP_011406498.1|	37.584	55.7	149	89	3	1542	1689	1022	1167	1.69e-21	102
sp|Q9BYW2|SETD2_HUMAN	gi|761919506|ref|XP_011408670.1|	33.889	46.67	180	101	5	1526	1689	64	241	5.19e-17	82
sp|Q9BYW2|SETD2_HUMAN	gi|761914126|ref|XP_011406165.1|	33.333	47.22	180	102	5	1526	1689	1663	1840	3.6e-16	84.7
sp|Q9BYW2|SETD2_HUMAN	gi|761909981|ref|XP_011404358.1|	45.122	59.76	82	39	3	1614	1689	980	1061	6.49e-13	73.9
# blastp
# Iteration: 0
# Query: Query_319294 sp|Q96L73|NSD1_HUMAN Histone-lysine N-methyltransferase, H3 lysine-36 and H4 lysine-20 specific OS=Homo sapiens GN=NSD1 PE=1 SV=1
# RID: WZ1K1FSR014
# Database: nr
# Fields: query id, subject ids, % identity, % positives, alignment length, mismatches, gap opens, q. start, q. end, s. start, s. end, evalue, bit score
# 8 hits found
sp|Q96L73|NSD1_HUMAN	gi|761905007|ref|XP_011410525.1|	36.741	52	675	371	13	1544	2194	377	1019	1.61e-135	452
sp|Q96L73|NSD1_HUMAN	gi|761914899|ref|XP_003389507.2|	41.989	54.14	181	86	10	1917	2081	761	938	9.78e-27	119
sp|Q96L73|NSD1_HUMAN	gi|761906267|ref|XP_011402833.1|	36.719	55.47	128	80	1	1954	2081	285	411	5.43e-23	103
sp|Q96L73|NSD1_HUMAN	gi|761914854|ref|XP_011406498.1|	36.879	53.9	141	86	3	1938	2077	1025	1163	3.36e-20	97.8
sp|Q96L73|NSD1_HUMAN	gi|761911186|ref|XP_011404891.1|	31.081	47.97	148	97	3	1863	2006	41	187	7.04e-16	77.4
sp|Q96L73|NSD1_HUMAN	gi|761919506|ref|XP_011408670.1|	33.152	46.74	184	98	8	1917	2081	64	241	8.59e-13	69.7
sp|Q96L73|NSD1_HUMAN	gi|761914126|ref|XP_011406165.1|	31.522	46.2	184	101	8	1917	2081	1663	1840	3.83e-11	68.2
sp|Q96L73|NSD1_HUMAN	gi|340371689|ref|XP_003384377.1|	42.029	56.52	69	31	3	1703	1764	315	381	4.19e-10	63.5
# blastp
# Iteration: 0
# Query: Query_319295 sp|Q9NRG4|SMYD2_HUMAN N-lysine methyltransferase SMYD2 OS=Homo sapiens GN=SMYD2 PE=1 SV=2
# RID: WZ1K1FSR014
# Database: nr
# Fields: query id, subject ids, % identity, % positives, alignment length, mismatches, gap opens, q. start, q. end, s. start, s. end, evalue, bit score
# 1 hits found
sp|Q9NRG4|SMYD2_HUMAN	gi|761914449|ref|XP_011406320.1|	24.819	41.93	415	273	5	18	428	21	400	3.99e-34	130
# blastp
# Iteration: 0
# Query: Query_319296 sp|O75164|KDM4A_HUMAN Lysine-specific demethylase 4A OS=Homo sapiens GN=KDM4A PE=1 SV=2
# RID: WZ1K1FSR014
# Database: nr
# Fields: query id, subject ids, % identity, % positives, alignment length, mismatches, gap opens, q. start, q. end, s. start, s. end, evalue, bit score
# 7 hits found
sp|O75164|KDM4A_HUMAN	gi|340387074|ref|XP_003392033.1|	68.182	81.17	154	49	0	106	259	1	154	3.35e-75	243
sp|O75164|KDM4A_HUMAN	gi|340374890|ref|XP_003385970.1|	33.607	52.05	244	134	5	89	304	361	604	1.96e-34	142
sp|O75164|KDM4A_HUMAN	gi|761901789|ref|XP_011406128.1|	39.007	56.74	141	79	4	731	869	310	445	1.92e-25	113
sp|O75164|KDM4A_HUMAN	gi|761901189|ref|XP_011403469.1|	33.077	50.77	130	81	3	748	872	45	173	1.93e-16	83.6
sp|O75164|KDM4A_HUMAN	gi|340369408|ref|XP_003383240.1|	26.786	39.88	168	93	3	735	872	110	277	4.28e-16	82
sp|O75164|KDM4A_HUMAN	gi|761914721|ref|XP_011406444.1|	33.065	53.23	124	75	5	728	848	196	314	1.64e-14	76.6
sp|O75164|KDM4A_HUMAN	gi|761912840|ref|XP_011405618.1|	33.684	56.84	95	59	1	928	1022	108	198	1.95e-13	70.5
# blastp
# Iteration: 0
# Query: Query_319297 sp|Q9Y4C1|KDM3A_HUMAN Lysine-specific demethylase 3A OS=Homo sapiens GN=KDM3A PE=1 SV=4
# RID: WZ1K1FSR014
# Database: nr
# Fields: query id, subject ids, % identity, % positives, alignment length, mismatches, gap opens, q. start, q. end, s. start, s. end, evalue, bit score
# 2 hits found
sp|Q9Y4C1|KDM3A_HUMAN	gi|761906166|ref|XP_011402798.1|	52.77	69.39	379	171	6	939	1314	1014	1387	5.79e-121	408
sp|Q9Y4C1|KDM3A_HUMAN	gi|761906166|ref|XP_011402798.1|	35.052	49.48	194	113	6	525	714	742	926	7.48e-27	118
# blastp
# Iteration: 0
# Query: Query_319298 sp|Q96KQ7|EHMT2_HUMAN Histone-lysine N-methyltransferase EHMT2 OS=Homo sapiens GN=EHMT2 PE=1 SV=3
# RID: WZ1K1FSR014
# Database: nr
# Fields: query id, subject ids, % identity, % positives, alignment length, mismatches, gap opens, q. start, q. end, s. start, s. end, evalue, bit score
# 32 hits found
sp|Q96KQ7|EHMT2_HUMAN	gi|761914899|ref|XP_003389507.2|	40.304	56.65	263	137	11	927	1176	680	935	5.24e-40	160
sp|Q96KQ7|EHMT2_HUMAN	gi|761918468|ref|XP_011408177.1|	33.992	50.59	253	164	2	628	880	129	378	2.47e-33	133
sp|Q96KQ7|EHMT2_HUMAN	gi|761918468|ref|XP_011408177.1|	30.303	50.65	231	158	2	654	884	56	283	7.76e-25	107
sp|Q96KQ7|EHMT2_HUMAN	gi|761918470|ref|XP_011408178.1|	35.931	51.95	231	145	2	654	884	413	640	3e-32	134
sp|Q96KQ7|EHMT2_HUMAN	gi|761918470|ref|XP_011408178.1|	34.632	48.92	231	148	2	654	884	380	607	4.21e-29	124
sp|Q96KQ7|EHMT2_HUMAN	gi|761918470|ref|XP_011408178.1|	33.195	48.55	241	153	3	654	889	347	584	2.45e-28	121
sp|Q96KQ7|EHMT2_HUMAN	gi|761918470|ref|XP_011408178.1|	34.091	45.45	264	159	3	596	859	433	681	2.68e-28	121
sp|Q96KQ7|EHMT2_HUMAN	gi|761918470|ref|XP_011408178.1|	31.179	45.63	263	173	4	636	898	263	517	2.59e-26	115
sp|Q96KQ7|EHMT2_HUMAN	gi|761918470|ref|XP_011408178.1|	34.021	48.97	194	125	2	635	828	493	683	1.29e-21	100
sp|Q96KQ7|EHMT2_HUMAN	gi|761918470|ref|XP_011408178.1|	33.333	50.77	195	129	1	689	883	1	194	9.16e-21	97.4
sp|Q96KQ7|EHMT2_HUMAN	gi|761918470|ref|XP_011408178.1|	31.841	48.76	201	135	2	687	886	32	231	1.36e-19	93.6
sp|Q96KQ7|EHMT2_HUMAN	gi|340385288|ref|XP_003391142.1|	33.202	52.17	253	166	2	634	886	561	810	5.79e-32	134
sp|Q96KQ7|EHMT2_HUMAN	gi|340385288|ref|XP_003391142.1|	33.476	52.36	233	152	2	654	886	416	645	1.31e-30	130
sp|Q96KQ7|EHMT2_HUMAN	gi|340385288|ref|XP_003391142.1|	31.217	52.91	189	129	1	678	866	864	1051	2.6e-22	103
sp|Q96KQ7|EHMT2_HUMAN	gi|340385288|ref|XP_003391142.1|	27.778	44.44	252	176	2	635	886	694	939	1.89e-17	87.4
sp|Q96KQ7|EHMT2_HUMAN	gi|340385288|ref|XP_003391142.1|	33.129	47.85	163	98	2	732	884	350	511	1.86e-15	80.9
sp|Q96KQ7|EHMT2_HUMAN	gi|761901546|ref|XP_011404925.1|	34.615	54.7	234	150	2	654	887	977	1207	2.53e-31	132
sp|Q96KQ7|EHMT2_HUMAN	gi|761901546|ref|XP_011404925.1|	30.769	53.42	234	159	2	654	887	845	1075	4.32e-26	115
sp|Q96KQ7|EHMT2_HUMAN	gi|761901546|ref|XP_011404925.1|	33.04	52.42	227	149	2	661	887	786	1009	6.58e-25	112
sp|Q96KQ7|EHMT2_HUMAN	gi|761901546|ref|XP_011404925.1|	30.612	51.02	245	163	4	654	895	1142	1382	1.02e-21	101
sp|Q96KQ7|EHMT2_HUMAN	gi|340386920|ref|XP_003391956.1|	35.043	52.56	234	149	2	654	887	133	363	4.03e-31	126
sp|Q96KQ7|EHMT2_HUMAN	gi|340386920|ref|XP_003391956.1|	31.321	44.91	265	148	2	654	886	67	329	2.78e-27	114
sp|Q96KQ7|EHMT2_HUMAN	gi|340386920|ref|XP_003391956.1|	33.047	49.36	233	153	2	654	886	1	230	6.01e-27	113
sp|Q96KQ7|EHMT2_HUMAN	gi|340386920|ref|XP_003391956.1|	34.356	51.53	163	106	1	725	887	4	165	2.75e-18	87.4
sp|Q96KQ7|EHMT2_HUMAN	gi|761919506|ref|XP_011408670.1|	36.818	49.55	220	118	7	972	1176	25	238	1.33e-30	120
sp|Q96KQ7|EHMT2_HUMAN	gi|761914126|ref|XP_011406165.1|	34.286	48.16	245	140	7	947	1176	1599	1837	8.7e-29	124
sp|Q96KQ7|EHMT2_HUMAN	gi|761901422|ref|XP_003382815.2|	31.897	48.71	232	126	1	687	886	168	399	1.03e-26	115
sp|Q96KQ7|EHMT2_HUMAN	gi|761901422|ref|XP_003382815.2|	30.942	51.57	223	151	2	654	876	104	323	4.87e-24	107
sp|Q96KQ7|EHMT2_HUMAN	gi|761901422|ref|XP_003382815.2|	28.899	47.71	218	154	1	686	903	2	218	2.63e-18	89.4
sp|Q96KQ7|EHMT2_HUMAN	gi|761901422|ref|XP_003382815.2|	27.895	44.74	190	101	2	654	809	368	555	6.89e-14	75.1
sp|Q96KQ7|EHMT2_HUMAN	gi|761919971|ref|XP_011408893.1|	31.863	56.86	204	135	4	687	886	5	208	3.51e-26	107
sp|Q96KQ7|EHMT2_HUMAN	gi|761919971|ref|XP_011408893.1|	30.597	52.99	134	92	1	750	882	2	135	2.28e-12	66.6
# blastp
# Iteration: 0
# Query: Query_319299 sp|Q15788|NCOA1_HUMAN Nuclear receptor coactivator 1 OS=Homo sapiens GN=NCOA1 PE=1 SV=3
# RID: WZ1K1FSR014
# Database: nr
# Fields: query id, subject ids, % identity, % positives, alignment length, mismatches, gap opens, q. start, q. end, s. start, s. end, evalue, bit score
# 2 hits found
sp|Q15788|NCOA1_HUMAN	gi|761907405|ref|XP_011403284.1|	25.773	42.27	291	169	13	95	367	75	336	9.84e-13	72
sp|Q15788|NCOA1_HUMAN	gi|761907407|ref|XP_011403285.1|	21.581	42.86	329	227	11	35	348	5	317	3.36e-12	70.1
# blastp
# Iteration: 0
# Query: Query_319300 sp|Q09472|EP300_HUMAN Histone acetyltransferase p300 OS=Homo sapiens GN=EP300 PE=1 SV=2
# RID: WZ1K1FSR014
# Database: nr
# Fields: query id, subject ids, % identity, % positives, alignment length, mismatches, gap opens, q. start, q. end, s. start, s. end, evalue, bit score
# 18 hits found
sp|Q09472|EP300_HUMAN	gi|761903018|ref|XP_011409728.1|	54.215	68.74	771	325	11	1047	1810	476	1225	0	853
sp|Q09472|EP300_HUMAN	gi|761903018|ref|XP_011409728.1|	48.913	75	92	47	0	569	660	142	233	1.11e-22	105
sp|Q09472|EP300_HUMAN	gi|761903018|ref|XP_011409728.1|	75.51	83.67	49	12	0	372	420	1	49	3.18e-18	91.3
sp|Q09472|EP300_HUMAN	gi|761912370|ref|XP_011405410.1|	48.182	65.06	770	371	10	1047	1810	557	1304	0	751
sp|Q09472|EP300_HUMAN	gi|761912370|ref|XP_011405410.1|	47.619	73.81	84	43	1	567	649	342	425	2.34e-18	92
sp|Q09472|EP300_HUMAN	gi|761912370|ref|XP_011405410.1|	52.222	58.89	90	15	2	331	420	202	263	5.12e-11	67.8
sp|Q09472|EP300_HUMAN	gi|761903021|ref|XP_003383604.2|	43.836	65.07	146	76	2	1666	1810	624	764	8.28e-37	152
sp|Q09472|EP300_HUMAN	gi|761903021|ref|XP_003383604.2|	67.925	76.42	106	31	1	318	420	101	206	6.98e-31	133
sp|Q09472|EP300_HUMAN	gi|761903021|ref|XP_003383604.2|	41.985	61.07	131	55	2	540	649	248	378	2.09e-22	105
sp|Q09472|EP300_HUMAN	gi|340386790|ref|XP_003391891.1|	65.714	73.33	105	33	1	325	426	28	132	6.48e-31	121
sp|Q09472|EP300_HUMAN	gi|340386790|ref|XP_003391891.1|	41.379	74.14	58	34	0	569	626	148	205	4.4e-11	63.9
sp|Q09472|EP300_HUMAN	gi|340385575|ref|XP_003391285.1|	65.385	76.92	104	35	1	318	420	69	172	6.16e-30	129
sp|Q09472|EP300_HUMAN	gi|340385575|ref|XP_003391285.1|	44	73	100	56	0	569	668	272	371	4.66e-22	103
sp|Q09472|EP300_HUMAN	gi|761903023|ref|XP_011409729.1|	61.224	73.47	98	35	1	331	425	33	130	3.36e-25	114
sp|Q09472|EP300_HUMAN	gi|761903023|ref|XP_011409729.1|	41.333	70.67	75	43	1	571	645	150	223	2.95e-11	68.2
sp|Q09472|EP300_HUMAN	gi|761914441|ref|XP_011406316.1|	43.902	62.2	82	46	0	1072	1153	214	295	3.57e-16	84.3
sp|Q09472|EP300_HUMAN	gi|761914441|ref|XP_011406316.1|	43.038	65.82	79	45	0	1072	1150	469	547	7.07e-15	80.1
sp|Q09472|EP300_HUMAN	gi|761901789|ref|XP_011406128.1|	36.559	62.37	93	56	2	1062	1154	669	758	3.2e-11	68.2
# blastp
# Iteration: 0
# Query: Query_319301 sp|Q92993|KAT5_HUMAN Histone acetyltransferase KAT5 OS=Homo sapiens GN=KAT5 PE=1 SV=2
# RID: WZ1K1FSR014
# Database: nr
# Fields: query id, subject ids, % identity, % positives, alignment length, mismatches, gap opens, q. start, q. end, s. start, s. end, evalue, bit score
# 4 hits found
sp|Q92993|KAT5_HUMAN	gi|761903375|ref|XP_011409864.1|	56.592	69.17	493	152	5	22	513	2	433	0	531
sp|Q92993|KAT5_HUMAN	gi|340371383|ref|XP_003384225.1|	55.477	74.2	283	118	3	224	504	122	398	3.46e-101	309
sp|Q92993|KAT5_HUMAN	gi|761907854|ref|XP_011403471.1|	49.638	68.12	276	131	2	235	507	438	708	2.05e-80	264
sp|Q92993|KAT5_HUMAN	gi|761914730|ref|XP_003389411.2|	62.651	76.51	166	61	1	235	399	361	526	7.65e-65	227
# blastp
# Iteration: 0
# Query: Query_319302 sp|Q8NHM5|KDM2B_HUMAN Lysine-specific demethylase 2B OS=Homo sapiens GN=KDM2B PE=1 SV=1
# RID: WZ1K1FSR014
# Database: nr
# Fields: query id, subject ids, % identity, % positives, alignment length, mismatches, gap opens, q. start, q. end, s. start, s. end, evalue, bit score
# 2 hits found
sp|Q8NHM5|KDM2B_HUMAN	gi|761910558|ref|XP_011404618.1|	47.452	67.2	314	159	2	63	370	1	314	6.33e-92	318
sp|Q8NHM5|KDM2B_HUMAN	gi|761908941|ref|XP_003386617.2|	46.996	62.9	283	139	2	88	370	110	381	1.41e-80	272
# blastp
# Iteration: 0
# Query: Query_319303 sp|Q92830|KAT2A_HUMAN Histone acetyltransferase KAT2A OS=Homo sapiens GN=KAT2A PE=1 SV=3
# RID: WZ1K1FSR014
# Database: nr
# Fields: query id, subject ids, % identity, % positives, alignment length, mismatches, gap opens, q. start, q. end, s. start, s. end, evalue, bit score
# 9 hits found
sp|Q92830|KAT2A_HUMAN	gi|761903264|ref|XP_011409824.1|	53.535	72.98	396	177	2	446	834	424	819	2.69e-130	408
sp|Q92830|KAT2A_HUMAN	gi|761903264|ref|XP_011409824.1|	45.675	66.78	289	145	5	94	380	26	304	2.09e-83	283
sp|Q92830|KAT2A_HUMAN	gi|761910823|ref|XP_011404736.1|	30.827	55.64	133	86	1	699	831	323	449	3.7e-15	79
sp|Q92830|KAT2A_HUMAN	gi|761914441|ref|XP_011406316.1|	36.782	55.17	87	53	1	745	829	464	550	1.57e-11	67.4
sp|Q92830|KAT2A_HUMAN	gi|761907065|ref|XP_011403152.1|	31.818	56.82	88	60	0	738	825	421	508	1.84e-11	66.2
sp|Q92830|KAT2A_HUMAN	gi|761919309|ref|XP_011408574.1|	33.333	60.49	81	54	0	741	821	40	120	2.35e-11	62.8
sp|Q92830|KAT2A_HUMAN	gi|761915548|ref|XP_011406801.1|	33.333	60.49	81	54	0	741	821	165	245	1.54e-10	62.4
sp|Q92830|KAT2A_HUMAN	gi|761915548|ref|XP_011406801.1|	30.769	53.85	91	59	1	735	821	33	123	7.03e-10	60.5
sp|Q92830|KAT2A_HUMAN	gi|761916674|ref|XP_011407318.1|	34.247	58.9	73	48	0	749	821	18	90	3.28e-10	58.2
# blastp
# Iteration: 0
# Query: Query_319304 sp|O60341|KDM1A_HUMAN Lysine-specific histone demethylase 1A OS=Homo sapiens GN=KDM1A PE=1 SV=2
# RID: WZ1K1FSR014
# Database: nr
# Fields: query id, subject ids, % identity, % positives, alignment length, mismatches, gap opens, q. start, q. end, s. start, s. end, evalue, bit score
# 2 hits found
sp|O60341|KDM1A_HUMAN	gi|761904133|ref|XP_011410173.1|	54.106	71.55	682	299	7	173	850	88	759	0	690
sp|O60341|KDM1A_HUMAN	gi|761906544|ref|XP_011402940.1|	32.012	50.91	328	181	8	525	827	439	749	4.04e-36	145
# blastp
# Iteration: 0
# Query: Query_319305 sp|P29375|KDM5A_HUMAN Lysine-specific demethylase 5A OS=Homo sapiens GN=KDM5A PE=1 SV=3
# RID: WZ1K1FSR014
# Database: nr
# Fields: query id, subject ids, % identity, % positives, alignment length, mismatches, gap opens, q. start, q. end, s. start, s. end, evalue, bit score
# 5 hits found
sp|P29375|KDM5A_HUMAN	gi|340374890|ref|XP_003385970.1|	41.121	59.35	1267	689	15	27	1266	20	1256	0	983
sp|P29375|KDM5A_HUMAN	gi|340387074|ref|XP_003392033.1|	32.317	52.44	164	89	3	388	551	10	151	2.87e-25	102
sp|P29375|KDM5A_HUMAN	gi|761904620|ref|XP_011410377.1|	28.571	44.81	154	80	4	249	376	1195	1344	4.98e-12	70.5
sp|P29375|KDM5A_HUMAN	gi|761914730|ref|XP_003389411.2|	32	48	100	47	2	296	381	192	284	2.24e-11	68.2
sp|P29375|KDM5A_HUMAN	gi|761908776|ref|XP_011403861.1|	44	64	50	28	0	291	340	359	408	5.12e-11	65.9
# blastp
# Iteration: 0
# Query: Query_319307 sp|P40963|SAS2_YEAST Histone acetyltransferase SAS2 OS=Saccharomyces cerevisiae (strain ATCC 204508 / S288c) GN=SAS2 PE=1 SV=1
# RID: WZ1K1FSR014
# Database: nr
# Fields: query id, subject ids, % identity, % positives, alignment length, mismatches, gap opens, q. start, q. end, s. start, s. end, evalue, bit score
# 4 hits found
sp|P40963|SAS2_YEAST	gi|340371383|ref|XP_003384225.1|	39.024	61.95	205	118	4	100	302	158	357	2.87e-43	153
sp|P40963|SAS2_YEAST	gi|761903375|ref|XP_011409864.1|	37.22	56.05	223	135	3	100	320	184	403	5.56e-39	142
sp|P40963|SAS2_YEAST	gi|761907854|ref|XP_011403471.1|	34.821	57.59	224	139	4	78	298	440	659	2.63e-37	140
sp|P40963|SAS2_YEAST	gi|761914730|ref|XP_003389411.2|	36.095	56.8	169	95	5	97	261	383	542	3.32e-25	105
# blastp
# Iteration: 0
# Query: Query_319308 sp|P34218|SAS3_YEAST Histone acetyltransferase SAS3 OS=Saccharomyces cerevisiae (strain ATCC 204508 / S288c) GN=SAS3 PE=1 SV=1
# RID: WZ1K1FSR014
# Database: nr
# Fields: query id, subject ids, % identity, % positives, alignment length, mismatches, gap opens, q. start, q. end, s. start, s. end, evalue, bit score
# 4 hits found
sp|P34218|SAS3_YEAST	gi|761903375|ref|XP_011409864.1|	54.751	70.59	221	85	2	260	480	150	355	7.57e-77	255
sp|P34218|SAS3_YEAST	gi|340371383|ref|XP_003384225.1|	46.429	63.49	252	111	4	272	523	130	357	1.37e-65	223
sp|P34218|SAS3_YEAST	gi|761907854|ref|XP_011403471.1|	42.688	61.66	253	122	2	271	523	434	663	3.67e-64	228
sp|P34218|SAS3_YEAST	gi|761914730|ref|XP_003389411.2|	55.09	73.05	167	66	1	280	446	366	523	5.44e-55	206
# blastp
# Iteration: 0
# Query: Query_319309 sp|P45975|SUV39_DROME Histone-lysine N-methyltransferase Su(var)3-9 OS=Drosophila melanogaster GN=Su(var)3-9 PE=1 SV=2
# RID: WZ1K1FSR014
# Database: nr
# Fields: query id, subject ids, % identity, % positives, alignment length, mismatches, gap opens, q. start, q. end, s. start, s. end, evalue, bit score
# 8 hits found
sp|P45975|SUV39_DROME	gi|761914899|ref|XP_003389507.2|	44.803	58.42	279	144	5	358	635	670	939	3.28e-61	218
sp|P45975|SUV39_DROME	gi|340375425|ref|XP_003386235.1|	83.824	89.71	68	11	0	13	80	25	92	4.76e-27	114
sp|P45975|SUV39_DROME	gi|761906267|ref|XP_011402833.1|	32.911	50.63	158	82	6	480	634	275	411	1.77e-18	87
sp|P45975|SUV39_DROME	gi|761919506|ref|XP_011408670.1|	33.466	43.43	251	140	8	397	634	5	241	6.3e-18	82.8
sp|P45975|SUV39_DROME	gi|761914126|ref|XP_011406165.1|	34.649	45.61	228	129	8	412	634	1628	1840	1.18e-15	80.1
sp|P45975|SUV39_DROME	gi|761914854|ref|XP_011406498.1|	33.108	49.32	148	76	6	489	634	1041	1167	7.91e-14	73.9
sp|P45975|SUV39_DROME	gi|761905007|ref|XP_011410525.1|	32.919	44.1	161	84	7	477	634	776	915	2.96e-12	68.9
sp|P45975|SUV39_DROME	gi|761909981|ref|XP_011404358.1|	32.847	43.8	137	63	4	518	635	936	1062	3.26e-12	68.9
# blastp
# Iteration: 0
# Query: Query_319311 sp|P32561|RPD3_YEAST Histone deacetylase RPD3 OS=Saccharomyces cerevisiae (strain ATCC 204508 / S288c) GN=RPD3 PE=1 SV=1
# RID: WZ1K1FSR014
# Database: nr
# Fields: query id, subject ids, % identity, % positives, alignment length, mismatches, gap opens, q. start, q. end, s. start, s. end, evalue, bit score
# 6 hits found
sp|P32561|RPD3_YEAST	gi|340373564|ref|XP_003385311.1|	61.928	79.28	415	154	1	18	432	9	419	0	523
sp|P32561|RPD3_YEAST	gi|761907638|ref|XP_011403384.1|	55.213	72.27	422	179	4	16	433	2	417	2.29e-162	501
sp|P32561|RPD3_YEAST	gi|340372211|ref|XP_003384638.1|	43.813	63.55	299	161	2	38	329	29	327	1.77e-80	252
sp|P32561|RPD3_YEAST	gi|761901187|ref|XP_011403467.1|	24.116	43.09	311	185	9	31	302	6	304	1.01e-23	101
sp|P32561|RPD3_YEAST	gi|340381672|ref|XP_003389345.1|	28.713	43.07	202	126	6	123	317	34	224	8.65e-17	79
sp|P32561|RPD3_YEAST	gi|761914575|ref|XP_003389340.2|	24.627	39.93	268	185	7	18	281	26	280	5.13e-15	73.9
# blastp
# Iteration: 0
# Query: Query_319312 sp|P53973|HDA1_YEAST Histone deacetylase HDA1 OS=Saccharomyces cerevisiae (strain ATCC 204508 / S288c) GN=HDA1 PE=1 SV=1
# RID: WZ1K1FSR014
# Database: nr
# Fields: query id, subject ids, % identity, % positives, alignment length, mismatches, gap opens, q. start, q. end, s. start, s. end, evalue, bit score
# 8 hits found
sp|P53973|HDA1_YEAST	gi|340368431|ref|XP_003382755.1|	44.267	60.8	375	187	4	58	432	39	391	1.01e-100	320
sp|P53973|HDA1_YEAST	gi|761901187|ref|XP_011403467.1|	34.211	53.16	380	202	9	83	433	13	373	1.22e-65	221
sp|P53973|HDA1_YEAST	gi|340373564|ref|XP_003385311.1|	28.869	48.51	336	199	14	57	385	9	311	1.2e-27	117
sp|P53973|HDA1_YEAST	gi|340372211|ref|XP_003384638.1|	24.476	47.2	286	182	11	77	351	23	285	1.38e-21	96.7
sp|P53973|HDA1_YEAST	gi|761907638|ref|XP_011403384.1|	24.138	45.77	319	203	11	77	385	18	307	3.96e-21	98.2
sp|P53973|HDA1_YEAST	gi|761914575|ref|XP_003389340.2|	25.194	46.12	258	163	8	83	339	46	274	1.13e-17	83.2
sp|P53973|HDA1_YEAST	gi|340381672|ref|XP_003389345.1|	27.511	44.98	229	140	9	175	395	31	241	1.23e-13	70.5
sp|P53973|HDA1_YEAST	gi|761917414|ref|XP_011407672.1|	47.458	67.8	59	31	0	174	232	95	153	2.21e-12	65.1
# blastp
# Iteration: 0
# Query: Query_319313 sp|P53096|HOS2_YEAST Probable histone deacetylase HOS2 OS=Saccharomyces cerevisiae (strain ATCC 204508 / S288c) GN=HOS2 PE=1 SV=1
# RID: WZ1K1FSR014
# Database: nr
# Fields: query id, subject ids, % identity, % positives, alignment length, mismatches, gap opens, q. start, q. end, s. start, s. end, evalue, bit score
# 6 hits found
sp|P53096|HOS2_YEAST	gi|761907638|ref|XP_011403384.1|	54.177	72.08	419	181	5	25	439	4	415	1.09e-150	470
sp|P53096|HOS2_YEAST	gi|340373564|ref|XP_003385311.1|	50.646	73.9	387	185	5	27	413	11	391	2.33e-147	430
sp|P53096|HOS2_YEAST	gi|340372211|ref|XP_003384638.1|	42.693	61.03	349	185	4	44	384	28	369	3.69e-86	267
sp|P53096|HOS2_YEAST	gi|761901187|ref|XP_011403467.1|	25.338	44.93	296	194	9	42	311	10	304	1.89e-24	103
sp|P53096|HOS2_YEAST	gi|340381672|ref|XP_003389345.1|	27.66	44.68	188	116	6	150	328	50	226	1.6e-13	69.3
sp|P53096|HOS2_YEAST	gi|761914575|ref|XP_003389340.2|	23.755	41.76	261	166	10	36	285	37	275	9.1e-11	61.6
