# Supplementary material for: Landscape of histone modifications in a sponge reveals the origin of animal cis-regulatory complexity
Source: eLife. 2017 Apr 11;6:e22194. doi: 10.7554/eLife.22194 (PMC5429095; doi:10.7554/eLife.22194)
Supplement: Figure 1—source data 4. — See also Materials and methods for preprocessing of ChIP-seq datasets procedure. DOI: http://dx.doi.org/10.7554/eLife.22194.007 [file elife-22194-fig1-data4.xlsx]

## Sheet: Figure 1-Source Data 4
Figure 1-source data 4. Summary statistics and quality metrics of the ChIP-seq datasets used in this study. See also Materials and Methods for preprocessing of ChIP-seq datasets procedure.
Adult	Input		H3K4me3		H3K36me3		H3K27me3		H3K4me1		RNAPII		H3K27ac	panH3
	Replicate 1	Replicate 2	Replicate 1	Replicate 2	Replicate 1	Replicate 2	Replicate 1	Replicate 2	Replicate 1	Replicate 2	Replicate 1	Replicate 2
Total Paired Reads	277061800	42265218	117049320	22840954	186888218	22073550	106713862	27377606	32494484	30286618	192915742	25775970	36822202	29136254
PF (passed filter) Paired Reads	269083412	38201198	112263028	20468298	178777988	20426184	102415830	25315112	29962226	28006306	187665076	23017512	34077302	26228246
Uniquley mapped PF Paired reads	105134638	10727624	40569608	8851992	64358730	6082284	32229444	8777198	11248792	10132934	71629896	9068898	12910740	10320388
Pooled mapped reads	115862262		49421600		70441014		41006642		21381726		80698794
Normalized strand cross-correlation coefficient (NSC >1.05)			1.19589	1.25781	1.04*	1.10238	1.10497	1.11292	1.08433	1.08301	1.04*	1.0796	1.07675	1.06387
Relative strand cross-correlation coefficient (RSC >1)			1.172	1.12786	1.15999	1.25169	1.12047	1.31153	1.30564	1.37324	1.18278	1.38144	1.24275	1.28079
Quality tag based on thresholded RSC (1:Good)			1	1	1	1	1	1	1	1	1	1	1	1
Genome-wide correlation of fold enrichment (≥0.5)			0.6		0.5		0.5		0.5		0.4
M-to-T ratio (IDR ≥0.5)			0.61		0.54		0.6		0.62		/
FRiP - Fraction of reads in peaks			0.431606	0.514961	0.261024	0.254415	0.417053	0.491171	0.392412	0.409428	/	0.10816	0.22
RNAPlII Replicate 1 did not pass all the quality threshold required so it has been excluded from all further analyses (in red). See Materials and Methods for details.
Larva	Input	H3K4me3	H3K27me3	H3K4me1	H3K27ac	RNAPII
Total Paired Reads	438182490	138421850	222481818	352206684	170026722	161737856
PF (passed filter) Paired Reads	382285370	114931592	192863226	297262662	120702136	102404084
Uniquley mapped PF Paired reads	178393170	73546686	81392000	125533588	58221294	48296476
Normalized strand cross-correlation coefficient (NSC >1.05)		1.43098	1.43098	1.04*	1.0541	1.04*
Relative strand cross-correlation coefficient (RSC >1)		1.66282	1.66282	3.03045	2.31488	2.16114
Quality tag based on thresholded RSC (2:Excellent)		2	2	2	2	2
FRiP - Fraction of reads in peaks		0.724583	0.382984	0.103964	0.205854	0.363635
*flag: may have low signal to noise, as NSC <1.05. However, this does not affect the conclusions of the paper in any way.
