# Supplementary material for: Landscape of histone modifications in a sponge reveals the origin of animal cis-regulatory complexity
Source: eLife. 2017 Apr 11;6:e22194. doi: 10.7554/eLife.22194 (PMC5429095; doi:10.7554/eLife.22194)
Supplement: Figure 1—source data 5. — DOI: http://dx.doi.org/10.7554/eLife.22194.008 [file elife-22194-fig1-data5.xlsx]

## Sheet: H3K4me1 
Figure 1-source data 5. ChIP-quantitative PCRs (ChIP-qPCRs) validations.
	Primer 1	Primer 2	Primer 3	Primer 4	Primer 5	Primer 6	Primer 7	Primer 8	Primer 9	Primer 10	Primer 11	Primer 12	Primer 13	Primer 14	Primer 15	Primer 16	Primer 17	Primer 18	Primer 19	Primer 20	Primer 21	intergenic 1	intergenic 2
input DNA_rep1	32.2	30.43	32.03	29.27	27.03	29.88	32.24	29.85	31.56	35	35	29.73	28.89	31.81	26.71	30.25	31.54	30.07	31.02	31.18	33.26	34.71	33.56
input DNA_rep2	32.1	30	31.99	29.82	27.03	29.81	32.06	29.95	31.73	35	35	29.55	28.82	31.79	26.72	30.12	31.7	30.02	30.91	31.47	33.47	34.31	33.72
input DNA_rep3	31.91	30.1	32.06	29.64	27.15	29.89	32.25	29.86	31.68	35	35	29.5	28.86	31.69	26.68	30.07	31.7	29.92	30.78	31.45	33.99	34.77	33.98
H3K4me1_rep1	28.67	27.1	29.94	26.58	23.74	26.83	28.76	27.22	30.94	35	35	25.77	26.32	27.63	23.21	25.3	30.2	27.34	27.17	28.3	32.75	32.55	32.54
H3K4me1_rep2	28.42	27.01	29.76	26.6	23.75	26.76	28.65	27.12	30.81	35	35	25.68	26.49	27.75	23.25	25.45	30.22	27.23	27.17	28.25	32.17	32.34	32.48
H3K4me1_rep3	28.77	26.92	29.68	26.49	23.72	26.55	28.49	27.12	30.81	35	35	25.72	26.28	27.75	23.17	25.3	30.28	27.44	27.06	27.93	31.95	32.24	32.36
ntc	35	/	35	35	/	35	/	35	/	/	/	/	31.53	/	35	35	35	35	/	/	/	/	/
Comments (note: program gives nominal value of 35 (5 less than total cycles) for any signal that comes up in the last five cycles)	ntc=primer dimer		ntc=primer dimer	ntc=primer dimer		ntc=primer dimer		ntc=primer dimer		ntc has no signal and this looks like correct amplicon, just comes up late so program gives all values as 35	ntc has no signal and this looks like correct amplicon, just comes up late so program gives all values as 35		ntc=primer dimer				ntc=primer dimer; two amplicons in all data.	ntc=primer dimer
Red = excluded from further analyses
Corresponding peak in manuscript	Intergenic peak upstream of Notch (Figure 6-figure supplement 5)	Intronic peak in Isl-Scaper (Figure 7C)	Intergenic peak in Figure 6-figure supplement 2	Intergenic peak in Figure 6-figure supplement 2	Intergenic peak in Figure 6-figure supplement 2	Intronic peak in Tfap4-Glis2 (Figure 7-figure supplement 1)	Intronic peak in Fos (Figure 6-figure supplment 5)	Intronic peak upstream of Sox14 (Figure 6-figure supplement 5)	Intragenic peak in NF-kB (Figure 6-figure supplement 5)			Intragenic peak in Prune-Bnipl (Figure 7-figure supplement 1)	Intronic peak in Exo1 (Figure 7-figure supplement 1)
	Primer 1	Primer 2	Primer 3	Primer 4	Primer 5	Primer 6	Primer 7	Primer 8	Primer 9	Primer 12	Primer 13	Primer 14	Primer 15	Primer 16	Primer 18	Primer 19	Primer 20	Primer 21	intergenic 1	intergenic 2
Adjusted input DNA_rep1	28.88	27.11	28.71	25.95	23.71	26.56	28.92	26.53	28.24	26.41	25.57	28.49	23.39	26.93	26.75	27.7	27.86	29.94	31.39	30.24
Adjusted input DNA_rep2	28.78	26.68	28.67	26.5	23.71	26.49	28.74	26.63	28.41	26.23	25.5	28.47	23.4	26.8	26.7	27.59	28.15	30.15	30.99	30.4
Adjusted input DNA_rep3	28.59	26.78	28.74	26.32	23.83	26.57	28.93	26.54	28.36	26.18	25.54	28.37	23.36	26.75	26.6	27.46	28.13	30.67	31.45	30.66
H3K4me1_rep1	28.67	27.1	29.94	26.58	23.74	26.83	28.76	27.22	30.94	25.77	26.32	27.63	23.21	25.3	27.34	27.17	28.3	32.75	32.55	32.54
H3K4me1_rep2	28.42	27.01	29.76	26.6	23.75	26.76	28.65	27.12	30.81	25.68	26.49	27.75	23.25	25.45	27.23	27.17	28.25	32.17	32.34	32.48
H3K4me1_rep3	28.77	26.92	29.68	26.49	23.72	26.55	28.49	27.12	30.81	25.72	26.28	27.75	23.17	25.3	27.44	27.06	27.93	31.95	32.24	32.36
	Primer 1	Primer 2	Primer 3	Primer 4	Primer 5	Primer 6	Primer 7	Primer 8	Primer 9	Primer 12	Primer 13	Primer 14	Primer 15	Primer 16	Primer 18	Primer 19	Primer 20	Primer 21
FC (intergenic 1)	2.34567	1.92741	1.00928	1.7411	2.16345	1.90088	2.51403	1.42734	0.374577	3.13834	1.2086	3.56359	2.41719	5.9656	1.36289	2.92817	1.9816	0.522439
FC (intergenic 2)	4.45883	3.66378	1.91853	3.30962	4.11246	3.61334	4.77886	2.71321	0.712025	5.9656	2.2974	6.77396	4.59479	11.3399	2.59068	5.5661	3.76678	0.993092

## Sheet: H3K27ac
	Primer 1	Primer 2	Primer 3	Primer 4	Primer 5	Primer 6	Primer 7	Primer 8	Primer 9	Primer 10	Primer 11	Primer 12	Primer 13	Primer 14	Primer 15	Primer 16	Primer 17	Primer 18	Primer 19	Primer 20	intergenic 1	intergenic 2
input DNA_rep1	31.1	35	29.11	30.66	29.79	30	29.89	28.77	35	30.29	32.78		30.27	32.26	35	28.72	30.88	31.54	31.44	29.43	34.61	33.8
input DNA_rep2	31.49	35	29.28	30.64	29.78	30.5	29.99	28.91	35	30.19	32.84		30.19	32.41	35	28.93	31.17	31.79	31.74	29.18	34.2	33.76
input DNA_rep3	31.42	35	29.24	31.03	29.93	30.35	29.88	28.85	35	30.56	32.62		30.42	32.87	35	28.94	30.87	31.73	31.83	29.58	34.27	33.47
H3K27ac_rep1	24.64	29.31	23.05	23.83	23.25	26.22	25.21	24.05	26.86	22.94	28.03		23.8	26.89	31.62	23.81	25.08	25.52	25.75	25.09	32.26	31.96
H3K27ac_rep2	24.86	29.19	23	23.82	23.26	26.27	25.25	24.01	27.16	22.91	28.13		23.84	26.91	31.24	23.8	25.04	25.42	25.56	25.18	32.08	31.98
H3K27ac_rep3	24.76	29.08	22.97	23.78	23.19	26.3	25.16	24	27.22	22.87	27.94		23.85	26.66	31.67	23.78	24.99	25.49	25.53	25.1	32.12	32.05
ntc	35	/	/	/	/	/	35	/	/	35	/		35	/	/	/	/	/	/	/	/	/
Comments (note: program gives nominal value of 35 (5 less than total cycles) for any signal that comes up in the last five cycles)	ntc=primer dimer						ntc=primer dimer			ntc=primer dimer			ntc=primer dimer
Red = excluded from further analyses
Corresponding peak in manuscript						Intronic peak in Tfap4-Glis2 (Figure 7-figure supplement 1)		Intronic peak downstream of Sox2 (Figure 6D)		Intronic peak upstream of Hfn4 (Figure 6-figure supplement 5)
	Primer 1	Primer 2	Primer 3	Primer 4	Primer 5	Primer 6	Primer 7	Primer 8	Primer 9	Primer 10	Primer 11	Primer 13	Primer 14	Primer 15	Primer 16	Primer 17	Primer 18	Primer 19	Primer 20	intergenic 1	intergenic 2
Adjusted input DNA_rep1	27.78	31.68	25.79	27.34	26.47	26.68	26.57	25.45	31.68	26.97	29.46	26.95	28.94	31.68	25.4	27.56	28.22	28.12	26.11	31.29	30.48
Adjusted input DNA_rep2	28.17	31.68	25.96	27.32	26.46	27.18	26.67	25.59	31.68	26.87	29.52	26.87	29.09	31.68	25.61	27.85	28.47	28.42	25.86	30.88	30.44
Adjusted input DNA_rep3	28.1	31.68	25.92	27.71	26.61	27.03	26.56	25.53	31.68	27.24	29.3	27.1	29.55	31.68	25.62	27.55	28.41	28.51	26.26	30.95	30.15
H3K27ac_rep1	24.64	29.31	23.05	23.83	23.25	26.22	25.21	24.05	26.86	22.94	28.03	23.8	26.89	31.62	23.81	25.08	25.52	25.75	25.09	32.26	31.96
H3K27ac_rep2	24.86	29.19	23	23.82	23.26	26.27	25.25	24.01	27.16	22.91	28.13	23.84	26.91	31.24	23.8	25.04	25.42	25.56	25.18	32.08	31.98
H3K27ac_rep3	24.76	29.08	22.97	23.78	23.19	26.3	25.16	24	27.22	22.87	27.94	23.85	26.66	31.67	23.78	24.99	25.49	25.53	25.1	32.12	32.05
	Primer 1	Primer 2	Primer 3	Primer 4	Primer 5	Primer 6	Primer 7	Primer 8	Primer 9	Primer 10	Primer 11	Primer 13	Primer 14	Primer 15	Primer 16	Primer 17	Primer 18	Primer 19	Primer 20
FC (intergenic 1)	20.7734	12.1257	15.9631	27.0958	21.0148	3.51453	5.68305	6.13331	52.4668	37.6175	5.68305	19.1154	11.2096	2.43401	7.26015	13.2691	16.037	14.42	4.18918
FC (intergenic 2)	29.9261	17.4683	22.9964	39.0342	30.2738	5.06303	8.18699	8.83563	75.5835	54.1917	8.18699	27.5376	16.1486	3.50642	10.459	19.1154	23.1029	20.7734	6.03491

## Sheet: H3K4me3 
	Primer 1	Primer 2	Primer 3	Primer 4	Primer 5	Primer 6	Primer 7	Primer 8	Primer 9	Primer 10	Intergenic 1	Intergenic 2
input DNA_rep1	30.79	32.46	32.48	30.45	31.61	30.51	32.24	32.53	32.3	35.44	37.12	35.51
input DNA_rep2	31.51	33.16	31.89	30.71	31.69	30.89	32.02	32.61	32.86	35.33	37.25	35.99
input DNA_rep3	31.29	32.71	32.19	30.92	31.11	30.84	32.21	32.56	32.72	34.96	37.97	35.19
H3K4me3_rep1	25.21	26.02	25.3	24.22	26.23	26.1	26.19	26.67	26.85	31.74	38.01	37.38
H3K4me3_rep2	25.22	25.99	25.33	24.14	26.44	26.07	26.14	26.63	26.72	31.67	37.05	37.21
H3K4me3_rep3	25.26	26.05	25.33	24.17	26.22	26.1	26.16	26.61	26.73	31.12	37.91	36.78
ntc	/	/	/	/	/	/	/	35.74	/	/	/	/
Comments	the melt curve suggests two amplicons are being amplified							ntc=primer dimer
Red = excluded from further analyses
Corresponding peak in manuscript					Stable gene in Figure 3
	Primer 2	Primer 3	Primer 4	Primer 5	Primer 6	Primer 7	Primer 8	Primer 9	Primer 10	Intergenic 1	Intergenic 2
Adjusted input DNA_rep1	29.14	29.16	27.13	28.29	27.19	28.92	29.21	28.98	32.12	33.8	32.19
Adjusted input DNA_rep2	29.84	28.57	27.39	28.37	27.57	28.7	29.29	29.54	32.01	33.93	32.67
Adjusted input DNA_rep3	29.39	28.87	27.6	27.79	27.52	28.89	29.24	29.4	31.64	34.65	31.87
H3K4me3_rep1	26.02	25.3	24.22	26.23	26.1	26.19	26.67	26.85	31.74	38.01	37.38
H3K4me3_rep2	25.99	25.33	24.14	26.44	26.07	26.14	26.63	26.72	31.67	37.05	37.21
H3K4me3_rep3	26.05	25.33	24.17	26.22	26.1	26.16	26.61	26.73	31.12	37.91	36.78
	Primer 2	Primer 3	Primer 4	Primer 5	Primer 6	Primer 7	Primer 8	Primer 9	Primer 10
FC (intergenic 1)	125.076	134.986	105.908	41.7393	29.1751	73.6868	70.5219	67.1819	15.3837
FC (intergenic 2)	318.835	344.096	269.972	106.398	74.3709	187.836	179.769	171.255	39.215

## Sheet: H3K27me3 
	Primer 1	Primer 2	Primer 3	Primer 4	Primer 5	Primer 6	Primer 7	Primer 8	Primer 9	Primer 10	Intergenic 1	Intergenic 2
input DNA_rep1	31.05	32.59	31.58	32.3	32.7	29.51	30.43	30.09	27.96	28.55	37.12	35.51
input DNA_rep2	31.14	32.48	31.63	32.42	32.67	29.54	30.49	30.51	28.19	28.85	37.25	35.99
input DNA_rep3	30.87	33.11	31.48	32.69	32.27	29.62	30.17	30.05	28.07	28.77	37.97	35.19
H3K27me3_rep1	25.49	28.1	28.63	28.13	29.78	25.44	26.61	25.8	24.92	28.04	36.95	37.44
H3K27me3_rep2	25.41	27.9	28.62	27.99	29.88	25.33	26.64	25.7	24.93	27.93	36.8	36.65
H3K27me3_rep3	25.47	27.92	28.48	27.91	29.61	25.46	26.51	25.71	24.89	27.8	37.06	39.07
ntc	/	/	/	/	/	/	/	/	/	/	/	/
comments	the melt curve suggests at least two amplicons are being amplified			the melt curve suggests two amplicons are being amplified
Red = excluded from further analyses
Corresponding peak in manuscript
	Primer 2	Primer 3	Primer 5	Primer 6	Primer 7	Primer 8	Primer 9	Primer 10	Intergenic 1	Intergenic 2
Adjusted input DNA_rep1	29.27	28.26	29.38	26.19	27.11	26.77	24.64	25.23	33.8	32.19
Adjusted input DNA_rep2	29.16	28.31	29.35	26.22	27.17	27.19	24.87	25.53	33.93	32.67
Adjusted input DNA_rep3	29.79	28.16	28.95	26.3	26.85	26.73	24.75	25.45	34.65	31.87
H3K27me3_rep1	28.1	28.63	29.78	25.44	26.61	25.8	24.92	28.04	36.95	37.44
H3K27me3_rep2	27.9	28.62	29.88	25.33	26.64	25.7	24.93	27.93	36.8	36.65
H3K27me3_rep3	27.92	28.48	29.61	25.46	26.51	25.71	24.89	27.8	37.06
	Primer 2	Primer 3	Primer 5	Primer 6	Primer 7	Primer 8	Primer 9	Primer 10
FC (intergenic 1)	18.9396	5.5661	4.85678	12.4379	9.6242	15.6707	6.27667	1.22264
FC (intergenic 2)	75.322	22.1362	19.3152	49.4649	38.2751	62.3219	24.9621	4.86239
