# Supplementary material for: Landscape of histone modifications in a sponge reveals the origin of animal cis-regulatory complexity
Source: eLife. 2017 Apr 11;6:e22194. doi: 10.7554/eLife.22194 (PMC5429095; doi:10.7554/eLife.22194)
Supplement: Figure 2—source data 1. — DOI: http://dx.doi.org/10.7554/eLife.22194.014 [file elife-22194-fig2-data1.xlsx]

## Sheet: Figure 2-Source Data 1
Figure 2-source data 1. GO Biological Process term enrichment outcome for the high-variance and low-variance gene sets (Hypergeometric test, FDR <0.01).
High-variance genes - GO Biological Process
The selected cluster :
AQU2.1.38450_001	AQU2.1.17638_001	AQU2.1.24499_001	AQU2.1.38353_001	AQU2.1.30426_001	AQU2.1.39629_001	AQU2.1.28170_001	AQU2.1.13999_001	AQU2.1.16621_001	AQU2.1.17573_001	AQU2.1.27024_001	AQU2.1.11674_001	AQU2.1.35355_001	AQU2.1.16427_001	AQU2.1.31378_001	AQU2.1.18687_001	AQU2.1.21454_001	AQU2.1.43945_001	AQU2.1.13720_001	AQU2.1.31572_001	AQU2.1.23741_001	AQU2.1.32945_001	AQU2.1.23709_001	AQU2.1.15151_001	AQU2.1.12315_001	AQU2.1.18849_001	AQU2.1.42734_001	AQU2.1.14075_001	AQU2.1.31243_001	AQU2.1.27853_001	AQU2.1.32357_001	AQU2.1.38659_001	AQU2.1.15642_001	AQU2.1.23876_001	AQU2.1.27168_001	AQU2.1.37471_001	AQU2.1.40044_001	AQU2.1.28670_001	AQU2.1.28735_001	AQU2.1.43213_001	AQU2.1.38594_001	AQU2.1.37439_001	AQU2.1.24461_001	AQU2.1.42002_001	AQU2.1.35952_001	AQU2.1.41426_001	AQU2.1.42878_001	AQU2.1.12500_001	AQU2.1.17100_001	AQU2.1.22424_001
AQU2.1.16195_001	AQU2.1.40202_001	AQU2.1.37300_001	AQU2.1.25764_001	AQU2.1.18459_001	AQU2.1.22928_001	AQU2.1.31707_001	AQU2.1.41268_001	AQU2.1.40008_001	AQU2.1.36764_001	AQU2.1.20295_001	AQU2.1.43375_001	AQU2.1.42006_001	AQU2.1.36176_001	AQU2.1.25023_001	AQU2.1.42624_001	AQU2.1.33354_001	AQU2.1.25562_001	AQU2.1.33613_001	AQU2.1.14361_001	AQU2.1.31151_001	AQU2.1.14807_001	AQU2.1.34389_001	AQU2.1.23390_001	AQU2.1.29516_001	AQU2.1.33652_001	AQU2.1.30259_001	AQU2.1.34631_001	AQU2.1.22323_001	AQU2.1.12302_001	AQU2.1.11985_001	AQU2.1.34504_001	AQU2.1.27866_001	AQU2.1.35569_001	AQU2.1.39318_001	AQU2.1.20567_001	AQU2.1.41913_001	AQU2.1.21274_001	AQU2.1.35544_001	AQU2.1.26558_001	AQU2.1.38081_001	AQU2.1.30181_001	AQU2.1.26088_001	AQU2.1.36562_001	AQU2.1.41444_001	AQU2.1.35828_001	AQU2.1.11512_001	AQU2.1.13812_001	AQU2.1.22699_001	AQU2.1.23736_001
AQU2.1.22779_001	AQU2.1.19552_001	AQU2.1.26612_001	AQU2.1.24982_001	AQU2.1.33872_001	AQU2.1.44108_001	AQU2.1.37511_001	AQU2.1.32262_001	AQU2.1.16208_001	AQU2.1.41983_001	AQU2.1.23336_001	AQU2.1.18495_001	AQU2.1.14194_001	AQU2.1.28265_001	AQU2.1.35504_001	AQU2.1.30874_001	AQU2.1.25777_001	AQU2.1.28358_001	AQU2.1.38786_001	AQU2.1.27129_001	AQU2.1.23201_001	AQU2.1.17701_001	AQU2.1.39257_001	AQU2.1.28686_001	AQU2.1.12665_001	AQU2.1.22208_001	AQU2.1.26690_001	AQU2.1.12517_001	AQU2.1.41330_001	AQU2.1.43441_001	AQU2.1.40667_001	AQU2.1.33463_001	AQU2.1.21915_001	AQU2.1.41251_001	AQU2.1.35102_001	AQU2.1.33420_001	AQU2.1.43878_001	AQU2.1.16049_001	AQU2.1.43735_001	AQU2.1.10979_001	AQU2.1.18065_001	AQU2.1.35294_001	AQU2.1.13430_001	AQU2.1.42168_001	AQU2.1.38536_001	AQU2.1.17616_001	AQU2.1.26549_001	AQU2.1.24495_001	AQU2.1.39951_001	AQU2.1.35430_001
AQU2.1.27905_001	AQU2.1.21524_001	AQU2.1.13106_001	AQU2.1.39210_001	AQU2.1.43695_001	AQU2.1.31471_001	AQU2.1.23683_001	AQU2.1.35992_001	AQU2.1.15980_001	AQU2.1.11218_001	AQU2.1.38747_001	AQU2.1.40026_001	AQU2.1.38619_001	AQU2.1.40197_001	AQU2.1.12893_001	AQU2.1.40617_001	AQU2.1.12990_001	AQU2.1.16079_001	AQU2.1.29438_001	AQU2.1.15859_001	AQU2.1.29519_001	AQU2.1.41909_001	AQU2.1.18400_001	AQU2.1.16370_001	AQU2.1.26812_001	AQU2.1.29551_001	AQU2.1.11488_001	AQU2.1.15046_001	AQU2.1.25245_001	AQU2.1.25020_001	AQU2.1.43550_001	AQU2.1.40696_001	AQU2.1.11666_001	AQU2.1.25326_001	AQU2.1.12080_001	AQU2.1.26794_001	AQU2.1.13291_001	AQU2.1.33022_001	AQU2.1.41988_001	AQU2.1.23217_001	AQU2.1.39556_001	AQU2.1.21117_001	AQU2.1.34481_001	AQU2.1.26947_001	AQU2.1.25389_001	AQU2.1.14986_001	AQU2.1.19917_001	AQU2.1.28581_001	AQU2.1.25817_001	AQU2.1.27280_001
AQU2.1.26089_001	AQU2.1.18055_001	AQU2.1.39673_001	AQU2.1.41445_001	AQU2.1.34364_001	AQU2.1.13086_001	AQU2.1.30445_001	AQU2.1.13000_001	AQU2.1.25869_001	AQU2.1.33565_001	AQU2.1.13111_001	AQU2.1.25175_001	AQU2.1.25781_001	AQU2.1.14209_001	AQU2.1.41396_001	AQU2.1.32619_001	AQU2.1.36450_001	AQU2.1.25892_001	AQU2.1.11914_001	AQU2.1.13701_001	AQU2.1.21570_001	AQU2.1.19221_001	AQU2.1.21104_001	AQU2.1.18515_001	AQU2.1.35611_001	AQU2.1.12134_001	AQU2.1.20724_001	AQU2.1.34206_001	AQU2.1.39664_001	AQU2.1.17619_001	AQU2.1.18988_001	AQU2.1.12632_001	AQU2.1.38350_001	AQU2.1.11493_001	AQU2.1.37758_001	AQU2.1.14160_001	AQU2.1.38798_001	AQU2.1.35070_001	AQU2.1.31463_001	AQU2.1.22493_001	AQU2.1.26429_001	AQU2.1.14853_001	AQU2.1.23663_001	AQU2.1.38712_001	AQU2.1.42679_001	AQU2.1.41371_001	AQU2.1.11297_001	AQU2.1.14910_001	AQU2.1.26816_001	AQU2.1.12864_001
AQU2.1.42428_001	AQU2.1.32074_001	AQU2.1.24638_001	AQU2.1.22401_001	AQU2.1.26850_001	AQU2.1.11830_001	AQU2.1.33651_001	AQU2.1.26515_001	AQU2.1.30740_001	AQU2.1.13170_001	AQU2.1.24983_001	AQU2.1.38740_001	AQU2.1.16081_001	AQU2.1.26771_001	AQU2.1.33784_001	AQU2.1.19216_001	AQU2.1.16305_001	AQU2.1.30064_001	AQU2.1.31631_001	AQU2.1.28283_001	AQU2.1.14599_001	AQU2.1.11884_001	AQU2.1.28362_001	AQU2.1.23747_001	AQU2.1.28810_001	AQU2.1.31578_001	AQU2.1.41813_001	AQU2.1.14624_001	AQU2.1.34489_001	AQU2.1.25189_001	AQU2.1.18417_001	AQU2.1.15362_001	AQU2.1.41803_001	AQU2.1.31248_001	AQU2.1.17028_001	AQU2.1.28659_001	AQU2.1.34592_001	AQU2.1.39302_001	AQU2.1.18581_001	AQU2.1.24466_001	AQU2.1.13974_001	AQU2.1.34444_001	AQU2.1.26691_001	AQU2.1.26156_001	AQU2.1.30223_001	AQU2.1.13072_001	AQU2.1.24071_001	AQU2.1.19733_001	AQU2.1.15729_001	AQU2.1.36882_001
AQU2.1.27573_001	AQU2.1.41048_001	AQU2.1.17713_001	AQU2.1.42043_001	AQU2.1.20058_001	AQU2.1.11949_001	AQU2.1.26439_001	AQU2.1.36486_001	AQU2.1.27430_001	AQU2.1.15223_001	AQU2.1.12312_001	AQU2.1.30249_001	AQU2.1.40814_001	AQU2.1.12381_001	AQU2.1.35763_001	AQU2.1.30836_001	AQU2.1.28181_001	AQU2.1.34196_001	AQU2.1.40598_001	AQU2.1.41578_001	AQU2.1.38087_001	AQU2.1.38331_001	AQU2.1.28353_001	AQU2.1.21825_001	AQU2.1.29663_001	AQU2.1.20486_001	AQU2.1.23841_001	AQU2.1.44231_001	AQU2.1.13635_001	AQU2.1.41709_001	AQU2.1.27117_001	AQU2.1.37694_001	AQU2.1.13076_001	AQU2.1.26639_001	AQU2.1.39597_001	AQU2.1.41965_001	AQU2.1.29076_001	AQU2.1.41320_001	AQU2.1.24992_001	AQU2.1.25157_001	AQU2.1.28627_001	AQU2.1.14415_001	AQU2.1.41463_001	AQU2.1.26980_001	AQU2.1.30892_001	AQU2.1.19570_001	AQU2.1.29048_001	AQU2.1.34795_001	AQU2.1.14397_001	AQU2.1.29527_001
AQU2.1.37556_001	AQU2.1.41302_001	AQU2.1.30244_001	AQU2.1.13287_001	AQU2.1.11413_001	AQU2.1.20867_001	AQU2.1.20135_001	AQU2.1.44541_001	AQU2.1.16970_001	AQU2.1.11228_001	AQU2.1.17190_001	AQU2.1.22356_001	AQU2.1.21830_001	AQU2.1.37516_001	AQU2.1.11798_001	AQU2.1.29869_001	AQU2.1.16938_001	AQU2.1.11221_001	AQU2.1.15302_001	AQU2.1.30543_001	AQU2.1.33913_001	AQU2.1.38999_001	AQU2.1.20811_001	AQU2.1.19493_001	AQU2.1.14266_001	AQU2.1.16398_001	AQU2.1.23317_001	AQU2.1.27236_001	AQU2.1.41802_001	AQU2.1.22483_001	AQU2.1.38727_001	AQU2.1.25122_001	AQU2.1.25449_001	AQU2.1.30455_001	AQU2.1.44298_001	AQU2.1.36490_001	AQU2.1.15446_001	AQU2.1.29658_001	AQU2.1.23905_001	AQU2.1.37748_001	AQU2.1.22282_001	AQU2.1.25981_001	AQU2.1.24612_001	AQU2.1.42736_001	AQU2.1.25778_001	AQU2.1.15218_001	AQU2.1.11237_001	AQU2.1.29426_001	AQU2.1.11856_001	AQU2.1.16382_001
AQU2.1.33127_001	AQU2.1.17703_001	AQU2.1.38571_001	AQU2.1.26262_001	AQU2.1.15586_001	AQU2.1.21013_001	AQU2.1.30644_001	AQU2.1.38741_001	AQU2.1.31034_001	AQU2.1.37180_001	AQU2.1.13396_001	AQU2.1.43565_001	AQU2.1.10977_001	AQU2.1.28176_001	AQU2.1.11795_001	AQU2.1.28273_001	AQU2.1.11707_001	AQU2.1.15748_001	AQU2.1.32977_001	AQU2.1.42531_001	AQU2.1.31864_001	AQU2.1.29492_001	AQU2.1.22054_001	AQU2.1.18987_001	AQU2.1.18511_001	AQU2.1.32219_001	AQU2.1.20710_001	AQU2.1.17970_001	AQU2.1.44054_001	AQU2.1.20123_001	AQU2.1.38482_001	AQU2.1.41047_001	AQU2.1.29940_001	AQU2.1.11233_001	AQU2.1.24661_001	AQU2.1.33724_001	AQU2.1.43750_001	AQU2.1.36187_001	AQU2.1.41555_001	AQU2.1.34352_001	AQU2.1.29432_001	AQU2.1.25936_001	AQU2.1.12256_001	AQU2.1.42578_001	AQU2.1.19222_001	AQU2.1.26425_001	AQU2.1.42123_001	AQU2.1.21163_001	AQU2.1.15397_001	AQU2.1.35981_001
AQU2.1.20101_001	AQU2.1.41823_001	AQU2.1.31888_001	AQU2.1.12380_001	AQU2.1.39268_001	AQU2.1.23840_001	AQU2.1.17829_001	AQU2.1.15091_001	AQU2.1.36472_001	AQU2.1.34782_001	AQU2.1.30537_001	AQU2.1.21452_001	AQU2.1.40213_001	AQU2.1.38404_001	AQU2.1.25186_001	AQU2.1.26796_001	AQU2.1.15652_001	AQU2.1.15780_001	AQU2.1.43452_001	AQU2.1.26179_001	AQU2.1.24950_001	AQU2.1.28628_001	AQU2.1.31000_001	AQU2.1.24993_001	AQU2.1.12654_001	AQU2.1.41421_001	AQU2.1.15150_001	AQU2.1.15337_001	AQU2.1.31400_001	AQU2.1.37867_001	AQU2.1.18807_001	AQU2.1.33761_001	AQU2.1.43667_001	AQU2.1.41464_001	AQU2.1.22404_001	AQU2.1.28597_001	AQU2.1.38117_001	AQU2.1.28856_001	AQU2.1.12497_001	AQU2.1.38202_001	AQU2.1.31415_001	AQU2.1.20114_001	AQU2.1.41436_001	AQU2.1.16675_001	AQU2.1.26538_001	AQU2.1.14270_001	AQU2.1.18791_001	AQU2.1.19341_001	AQU2.1.17181_001	AQU2.1.15022_001
AQU2.1.34292_001	AQU2.1.11263_001	AQU2.1.17738_001	AQU2.1.31080_001	AQU2.1.20661_001	AQU2.1.26233_001	AQU2.1.13595_001	AQU2.1.40466_001	AQU2.1.35518_001	AQU2.1.26963_001	AQU2.1.43212_001	AQU2.1.40043_001	AQU2.1.14353_001	AQU2.1.14146_001	AQU2.1.41781_001	AQU2.1.34794_001	AQU2.1.31150_001	AQU2.1.34388_001	AQU2.1.17603_001	AQU2.1.14249_001	AQU2.1.26332_001	AQU2.1.36191_001	AQU2.1.12737_001	AQU2.1.24529_001	AQU2.1.39173_001	AQU2.1.33894_001	AQU2.1.31037_001	AQU2.1.11267_001	AQU2.1.14725_001	AQU2.1.36160_001	AQU2.1.39592_001	AQU2.1.35029_001	AQU2.1.13255_001	AQU2.1.26274_001	AQU2.1.15476_001	AQU2.1.24530_001	AQU2.1.29411_001	AQU2.1.39777_001	AQU2.1.25337_001	AQU2.1.33693_001	AQU2.1.12803_001	AQU2.1.36209_001	AQU2.1.26904_001	AQU2.1.29884_001	AQU2.1.44096_001	AQU2.1.13201_001	AQU2.1.24487_001	AQU2.1.38597_001	AQU2.1.24496_001	AQU2.1.39820_001
AQU2.1.38314_001	AQU2.1.11384_001	AQU2.1.43549_001	AQU2.1.29493_001	AQU2.1.22142_001	AQU2.1.22053_001	AQU2.1.20097_001	AQU2.1.21566_001	AQU2.1.41795_001	AQU2.1.35250_001	AQU2.1.19529_001	AQU2.1.42169_001	AQU2.1.36284_001	AQU2.1.32969_001	AQU2.1.28355_001	AQU2.1.31846_001	AQU2.1.32156_001	AQU2.1.37851_001	AQU2.1.25937_001	AQU2.1.39630_001	AQU2.1.29237_001	AQU2.1.16539_001	AQU2.1.42711_001	AQU2.1.14365_001	AQU2.1.26093_001	AQU2.1.30910_001	AQU2.1.23684_001	AQU2.1.19198_001	AQU2.1.17380_001	AQU2.1.35959_001	AQU2.1.22689_001	AQU2.1.13154_001	AQU2.1.38481_001	AQU2.1.16814_001	AQU2.1.28301_001	AQU2.1.30225_001	AQU2.1.13252_001	AQU2.1.43057_001	AQU2.1.22439_001	AQU2.1.34362_001	AQU2.1.38778_001	AQU2.1.26986_001	AQU2.1.20880_001	AQU2.1.21270_001	AQU2.1.24147_001	AQU2.1.41820_001	AQU2.1.29139_001	AQU2.1.20122_001	AQU2.1.29270_001	AQU2.1.16572_001
AQU2.1.30638_001	AQU2.1.13322_001	AQU2.1.22161_001	AQU2.1.37194_001	AQU2.1.15653_001	AQU2.1.32263_001	AQU2.1.14000_001	AQU2.1.43479_001	AQU2.1.42530_001	AQU2.1.36069_001	AQU2.1.13078_001	AQU2.1.28494_001	AQU2.1.13103_001	AQU2.1.26163_001	AQU2.1.37781_001	AQU2.1.44703_001	AQU2.1.13189_001	AQU2.1.41878_001	AQU2.1.16074_001	AQU2.1.15510_001	AQU2.1.15596_001	AQU2.1.42302_001	AQU2.1.18421_001	AQU2.1.25689_001	AQU2.1.30164_001	AQU2.1.14919_001	AQU2.1.26893_001	AQU2.1.43955_001	AQU2.1.32765_001	AQU2.1.26982_001	AQU2.1.15792_001	AQU2.1.26395_001	AQU2.1.20488_001	AQU2.1.21410_001	AQU2.1.17780_001	AQU2.1.15090_001	AQU2.1.21496_001	AQU2.1.38444_001	AQU2.1.24738_001	AQU2.1.41237_001	AQU2.1.20932_001	AQU2.1.37436_001	AQU2.1.35505_001	AQU2.1.27260_001	AQU2.1.41348_001	AQU2.1.27286_001	AQU2.1.11575_001	AQU2.1.33760_001	AQU2.1.21553_001	AQU2.1.41609_001
No annotations were retrieved for the following entities:
AQU2.1.34795_001	AQU2.1.38353_001	AQU2.1.38175_001	AQU2.1.16079_001	AQU2.1.29519_001	AQU2.1.16621_001	AQU2.1.38272_001	AQU2.1.19530_001	AQU2.1.28510_001	AQU2.1.26812_001	AQU2.1.17573_001	AQU2.1.29551_001	AQU2.1.35274_001	AQU2.1.43518_001	AQU2.1.31894_001	AQU2.1.37320_001	AQU2.1.15046_001	AQU2.1.15224_001	AQU2.1.11674_001	AQU2.1.35355_001	AQU2.1.16427_001	AQU2.1.25245_001	AQU2.1.31378_001	AQU2.1.25020_001	AQU2.1.27105_001	AQU2.1.34805_001	AQU2.1.43550_001	AQU2.1.11666_001	AQU2.1.34330_001	AQU2.1.23709_001	AQU2.1.22514_001	AQU2.1.42734_001	AQU2.1.42459_001	AQU2.1.32535_001	AQU2.1.21535_001	AQU2.1.38675_001	AQU2.1.22200_001	AQU2.1.27853_001	AQU2.1.32357_001	AQU2.1.41988_001	AQU2.1.23217_001	AQU2.1.34392_001	AQU2.1.28654_001	AQU2.1.39556_001	AQU2.1.15642_001	AQU2.1.29124_001	AQU2.1.38942_001	AQU2.1.26947_001	AQU2.1.22603_001	AQU2.1.28670_001
AQU2.1.35043_001	AQU2.1.11659_001	AQU2.1.12421_001	AQU2.1.40945_001	AQU2.1.43290_001	AQU2.1.41238_001	AQU2.1.34366_001	AQU2.1.13265_001	AQU2.1.16620_001	AQU2.1.30532_001	AQU2.1.12817_001	AQU2.1.44659_001	AQU2.1.11809_001	AQU2.1.26198_001	AQU2.1.12744_001	AQU2.1.26562_001	AQU2.1.21376_001	AQU2.1.17744_001	AQU2.1.36761_001	AQU2.1.11800_001	AQU2.1.11436_001	AQU2.1.41245_001	AQU2.1.23236_001	AQU2.1.44342_001	AQU2.1.30524_001	AQU2.1.31232_001	AQU2.1.11622_001	AQU2.1.41969_001	AQU2.1.36727_001	AQU2.1.12029_001	AQU2.1.30567_001	AQU2.1.13696_001	AQU2.1.24488_001	AQU2.1.42733_001	AQU2.1.44020_001	AQU2.1.37482_001	AQU2.1.42512_001	AQU2.1.28716_001	AQU2.1.36877_001	AQU2.1.17322_001	AQU2.1.15640_001	AQU2.1.28750_001	AQU2.1.16614_001	AQU2.1.34250_001	AQU2.1.44665_001	AQU2.1.24188_001	AQU2.1.17637_001	AQU2.1.21455_001	AQU2.1.41847_001	AQU2.1.27791_001
AQU2.1.27237_001	AQU2.1.12077_001	AQU2.1.23335_001	AQU2.1.36033_001	AQU2.1.28076_001	AQU2.1.27254_001	AQU2.1.41512_001	AQU2.1.20836_001	AQU2.1.29716_001	AQU2.1.14763_001	AQU2.1.25690_001	AQU2.1.29458_001	AQU2.1.30873_001	AQU2.1.24601_001	AQU2.1.39674_001	AQU2.1.24497_001	AQU2.1.14323_001	AQU2.1.16527_001	AQU2.1.17819_001	AQU2.1.25306_001	AQU2.1.33498_001	AQU2.1.37675_001	AQU2.1.11796_001	AQU2.1.25693_001	AQU2.1.13257_001	AQU2.1.39590_001	AQU2.1.11311_001	AQU2.1.11524_001	AQU2.1.40791_001	AQU2.1.39663_001	AQU2.1.39248_001	AQU2.1.43358_001	AQU2.1.20164_001	AQU2.1.20652_001	AQU2.1.13281_001	AQU2.1.32630_001	AQU2.1.25979_001	AQU2.1.33094_001	AQU2.1.14364_001	AQU2.1.32947_001	AQU2.1.26385_001	AQU2.1.38351_001	AQU2.1.14321_001	AQU2.1.30312_001	AQU2.1.30541_001	AQU2.1.43889_001	AQU2.1.39647_001	AQU2.1.15745_001	AQU2.1.38223_001	AQU2.1.27855_001
AQU2.1.25036_001	AQU2.1.15917_001	AQU2.1.25109_001	AQU2.1.35250_001	AQU2.1.32503_001	AQU2.1.17669_001	AQU2.1.39863_001	AQU2.1.19529_001	AQU2.1.28169_001	AQU2.1.44223_001	AQU2.1.16250_001	AQU2.1.32969_001	AQU2.1.13600_001	AQU2.1.33714_001	AQU2.1.31846_001	AQU2.1.37851_001	AQU2.1.25937_001	AQU2.1.30539_001	AQU2.1.39630_001	AQU2.1.42711_001	AQU2.1.26093_001	AQU2.1.41208_001	AQU2.1.30910_001	AQU2.1.18416_001	AQU2.1.25188_001	AQU2.1.32809_001	AQU2.1.23684_001	AQU2.1.22883_001	AQU2.1.17363_001	AQU2.1.29318_001	AQU2.1.35959_001	AQU2.1.13154_001	AQU2.1.39184_001	AQU2.1.38716_001	AQU2.1.11198_001	AQU2.1.40932_001	AQU2.1.13252_001	AQU2.1.43057_001	AQU2.1.28870_001	AQU2.1.26994_001	AQU2.1.22439_001	AQU2.1.43888_001	AQU2.1.23854_001	AQU2.1.21270_001	AQU2.1.12800_001	AQU2.1.12711_001	AQU2.1.23130_001	AQU2.1.20589_001	AQU2.1.41820_001	AQU2.1.36050_001
AQU2.1.33643_001	AQU2.1.34121_001	AQU2.1.14961_001	AQU2.1.23702_001	AQU2.1.25347_001	AQU2.1.14855_001	AQU2.1.18016_001	AQU2.1.20712_001	AQU2.1.43729_001	AQU2.1.41911_001	AQU2.1.43763_001	AQU2.1.12021_001	AQU2.1.16971_001	AQU2.1.18746_001	AQU2.1.41145_001	AQU2.1.13251_001	AQU2.1.30875_001	AQU2.1.19632_001	AQU2.1.16420_001	AQU2.1.31204_001	AQU2.1.20204_001	AQU2.1.30619_001	AQU2.1.24388_001	AQU2.1.11278_001	AQU2.1.12200_001	AQU2.1.40344_001	AQU2.1.27888_001	AQU2.1.20618_001	AQU2.1.16303_001	AQU2.1.40927_001	AQU2.1.28642_001	AQU2.1.21482_001	AQU2.1.11089_001	AQU2.1.11631_001	AQU2.1.37177_001	AQU2.1.27462_001	AQU2.1.33904_001	AQU2.1.25016_001	AQU2.1.22219_001	AQU2.1.27470_001	AQU2.1.28568_001	AQU2.1.13077_001	AQU2.1.17771_001	AQU2.1.20255_001	AQU2.1.37525_001	AQU2.1.16687_001	AQU2.1.11115_001	AQU2.1.15034_001	AQU2.1.33347_001	AQU2.1.32497_001
AQU2.1.27089_001	AQU2.1.37926_001	AQU2.1.43452_001	AQU2.1.17784_001	AQU2.1.23827_001	AQU2.1.31229_001	AQU2.1.31216_001	AQU2.1.41161_001	AQU2.1.14158_001	AQU2.1.20229_001	AQU2.1.29378_001	AQU2.1.26179_001	AQU2.1.42301_001	AQU2.1.18177_001	AQU2.1.43064_001	AQU2.1.24950_001	AQU2.1.28628_001	AQU2.1.31000_001	AQU2.1.21239_001	AQU2.1.27874_001	AQU2.1.38746_001	AQU2.1.34641_001	AQU2.1.43954_001	AQU2.1.19442_001	AQU2.1.13736_001	AQU2.1.39840_001	AQU2.1.20058_001	AQU2.1.21023_001	AQU2.1.18205_001	AQU2.1.41006_001	AQU2.1.11949_001	AQU2.1.37867_001	AQU2.1.11604_001	AQU2.1.18807_001	AQU2.1.38603_001	AQU2.1.32867_001	AQU2.1.13809_001	AQU2.1.39581_001	AQU2.1.41464_001	AQU2.1.22404_001	AQU2.1.26996_001	AQU2.1.11489_001	AQU2.1.40814_001	AQU2.1.38202_001	AQU2.1.31415_001	AQU2.1.39598_001	AQU2.1.15322_001	AQU2.1.35763_001	AQU2.1.16675_001	AQU2.1.11705_001
GO-ID	p-value	corr p-value	x	n	X	N	Description	Genes in test set
50794	4.1462e-14	1.5805e-10	688	5970	1823	19944	regulation of cellular process	AQU2.1.12893_001|AQU2.1.24499_001|AQU2.1.40617_001|AQU2.1.12443_001|AQU2.1.14397_001|AQU2.1.30426_001|AQU2.1.15859_001|AQU2.1.36493_001|AQU2.1.21091_001|AQU2.1.12168_001|AQU2.1.31177_001|AQU2.1.22367_001|AQU2.1.37858_001|AQU2.1.28499_001|AQU2.1.11956_001|AQU2.1.23210_001|AQU2.1.41828_001|AQU2.1.21431_001|AQU2.1.38523_001|AQU2.1.12605_001|AQU2.1.41201_001|AQU2.1.15135_001|AQU2.1.22537_001|AQU2.1.3…
50789	1.9264e-12	3.6717e-09	710	6302	1823	19944	regulation of biological process	AQU2.1.12893_001|AQU2.1.24499_001|AQU2.1.40617_001|AQU2.1.12443_001|AQU2.1.14397_001|AQU2.1.30426_001|AQU2.1.15859_001|AQU2.1.36493_001|AQU2.1.21091_001|AQU2.1.12168_001|AQU2.1.31177_001|AQU2.1.22367_001|AQU2.1.37858_001|AQU2.1.28499_001|AQU2.1.11956_001|AQU2.1.23210_001|AQU2.1.41828_001|AQU2.1.38779_001|AQU2.1.21431_001|AQU2.1.38523_001|AQU2.1.12605_001|AQU2.1.41201_001|AQU2.1.15135_001|AQU2.1.2…
44700	3.1507e-10	3.0026e-07	452	3824	1823	19944	single organism signaling	AQU2.1.12893_001|AQU2.1.24499_001|AQU2.1.30426_001|AQU2.1.15859_001|AQU2.1.21091_001|AQU2.1.12168_001|AQU2.1.37858_001|AQU2.1.28499_001|AQU2.1.23210_001|AQU2.1.21431_001|AQU2.1.12605_001|AQU2.1.15135_001|AQU2.1.22537_001|AQU2.1.38821_001|AQU2.1.12161_001|AQU2.1.19496_001|AQU2.1.25784_001|AQU2.1.30055_001|AQU2.1.20131_001|AQU2.1.33181_001|AQU2.1.25326_001|AQU2.1.12822_001|AQU2.1.12080_001|AQU2.1.1…
23052	3.1507e-10	3.0026e-07	452	3824	1823	19944	signaling	AQU2.1.12893_001|AQU2.1.24499_001|AQU2.1.30426_001|AQU2.1.15859_001|AQU2.1.21091_001|AQU2.1.12168_001|AQU2.1.37858_001|AQU2.1.28499_001|AQU2.1.23210_001|AQU2.1.21431_001|AQU2.1.12605_001|AQU2.1.15135_001|AQU2.1.22537_001|AQU2.1.38821_001|AQU2.1.12161_001|AQU2.1.19496_001|AQU2.1.25784_001|AQU2.1.30055_001|AQU2.1.20131_001|AQU2.1.33181_001|AQU2.1.25326_001|AQU2.1.12822_001|AQU2.1.12080_001|AQU2.1.1…
7154	1.0832e-09	8.2583e-07	467	4007	1823	19944	cell communication	AQU2.1.12893_001|AQU2.1.24499_001|AQU2.1.30426_001|AQU2.1.15859_001|AQU2.1.21091_001|AQU2.1.12168_001|AQU2.1.37858_001|AQU2.1.28499_001|AQU2.1.23210_001|AQU2.1.21431_001|AQU2.1.12605_001|AQU2.1.15135_001|AQU2.1.22537_001|AQU2.1.38821_001|AQU2.1.12161_001|AQU2.1.43945_001|AQU2.1.19496_001|AQU2.1.25784_001|AQU2.1.30055_001|AQU2.1.20131_001|AQU2.1.33181_001|AQU2.1.25326_001|AQU2.1.12822_001|AQU2.1.1…
7165	4.3932e-09	2.7911e-06	437	3747	1823	19944	signal transduction	AQU2.1.12893_001|AQU2.1.24499_001|AQU2.1.30426_001|AQU2.1.15859_001|AQU2.1.21091_001|AQU2.1.12168_001|AQU2.1.37858_001|AQU2.1.28499_001|AQU2.1.23210_001|AQU2.1.21431_001|AQU2.1.12605_001|AQU2.1.15135_001|AQU2.1.22537_001|AQU2.1.38821_001|AQU2.1.12161_001|AQU2.1.19496_001|AQU2.1.25784_001|AQU2.1.30055_001|AQU2.1.20131_001|AQU2.1.33181_001|AQU2.1.25326_001|AQU2.1.12822_001|AQU2.1.12080_001|AQU2.1.1…
44699	2.1959e-08	1.1549e-05	1167	11567	1823	19944	single-organism process	AQU2.1.38450_001|AQU2.1.12893_001|AQU2.1.17638_001|AQU2.1.24499_001|AQU2.1.40617_001|AQU2.1.30426_001|AQU2.1.15859_001|AQU2.1.39548_001|AQU2.1.39629_001|AQU2.1.37858_001|AQU2.1.16370_001|AQU2.1.13550_001|AQU2.1.38523_001|AQU2.1.19077_001|AQU2.1.27024_001|AQU2.1.11399_001|AQU2.1.41201_001|AQU2.1.15135_001|AQU2.1.43453_001|AQU2.1.18687_001|AQU2.1.12161_001|AQU2.1.21454_001|AQU2.1.43945_001|AQU2.1.1…
50896	2.4237e-08	1.1549e-05	636	5831	1823	19944	response to stimulus	AQU2.1.12893_001|AQU2.1.24499_001|AQU2.1.40617_001|AQU2.1.14397_001|AQU2.1.30426_001|AQU2.1.15859_001|AQU2.1.39548_001|AQU2.1.21091_001|AQU2.1.12168_001|AQU2.1.22367_001|AQU2.1.37858_001|AQU2.1.28499_001|AQU2.1.23210_001|AQU2.1.21431_001|AQU2.1.19077_001|AQU2.1.11232_001|AQU2.1.12605_001|AQU2.1.11399_001|AQU2.1.15585_001|AQU2.1.15135_001|AQU2.1.22537_001|AQU2.1.43453_001|AQU2.1.38821_001|AQU2.1.1…
65007	6.7407e-08	2.8551e-05	775	7332	1823	19944	biological regulation	AQU2.1.12893_001|AQU2.1.17638_001|AQU2.1.24499_001|AQU2.1.40617_001|AQU2.1.14397_001|AQU2.1.30426_001|AQU2.1.15859_001|AQU2.1.39548_001|AQU2.1.36493_001|AQU2.1.37858_001|AQU2.1.41828_001|AQU2.1.38523_001|AQU2.1.41201_001|AQU2.1.15135_001|AQU2.1.12161_001|AQU2.1.19496_001|AQU2.1.40696_001|AQU2.1.23741_001|AQU2.1.32945_001|AQU2.1.11352_001|AQU2.1.33181_001|AQU2.1.25326_001|AQU2.1.12822_001|AQU2.1.1…
7166	8.7399e-06	0.0033316	81	546	1823	19944	cell surface receptor signaling pathway	AQU2.1.32612_001|AQU2.1.24811_001|AQU2.1.36176_001|AQU2.1.38735_001|AQU2.1.17833_001|AQU2.1.25677_001|AQU2.1.14409_001|AQU2.1.13478_001|AQU2.1.14612_001|AQU2.1.32514_001|AQU2.1.41482_001|AQU2.1.41325_001|AQU2.1.12737_001|AQU2.1.30842_001|AQU2.1.12816_001|AQU2.1.15622_001|AQU2.1.20122_001|AQU2.1.31859_001|AQU2.1.36143_001|AQU2.1.29479_001|AQU2.1.13144_001|AQU2.1.37297_001|AQU2.1.24071_001|AQU2.1.1…
51716	2.0092e-05	0.0069627	556	5261	1823	19944	cellular response to stimulus	AQU2.1.12893_001|AQU2.1.24499_001|AQU2.1.14397_001|AQU2.1.30426_001|AQU2.1.15859_001|AQU2.1.39548_001|AQU2.1.21091_001|AQU2.1.12168_001|AQU2.1.22367_001|AQU2.1.37858_001|AQU2.1.28499_001|AQU2.1.23210_001|AQU2.1.21431_001|AQU2.1.11232_001|AQU2.1.12605_001|AQU2.1.11399_001|AQU2.1.15585_001|AQU2.1.15135_001|AQU2.1.22537_001|AQU2.1.43453_001|AQU2.1.38821_001|AQU2.1.12161_001|AQU2.1.25687_001|AQU2.1.1…
Low-variance genes - GO Biological Process
The selected cluster :
AQU2.1.16362_001	AQU2.1.14672_001	AQU2.1.16265_001	AQU2.1.14575_001	AQU2.1.38256_001	AQU2.1.26383_001	AQU2.1.36469_001	AQU2.1.26545_001	AQU2.1.14478_001	AQU2.1.36825_001	AQU2.1.21519_001	AQU2.1.21792_001	AQU2.1.11771_001	AQU2.1.29187_001	AQU2.1.26901_001	AQU2.1.25431_001	AQU2.1.31002_001	AQU2.1.22271_001	AQU2.1.22174_001	AQU2.1.37304_001	AQU2.1.42475_001	AQU2.1.12153_001	AQU2.1.11433_001	AQU2.1.12547_001	AQU2.1.11530_001	AQU2.1.30167_001	AQU2.1.29946_001	AQU2.1.40285_001	AQU2.1.14172_001	AQU2.1.17832_001	AQU2.1.40188_001	AQU2.1.11104_001	AQU2.1.38853_001	AQU2.1.16765_001	AQU2.1.30120_001	AQU2.1.26689_001	AQU2.1.15448_001	AQU2.1.19022_001	AQU2.1.12385_001	AQU2.1.34279_001	AQU2.1.23885_001	AQU2.1.16594_001	AQU2.1.31502_001	AQU2.1.29881_001	AQU2.1.13758_001	AQU2.1.44262_001	AQU2.1.19657_001	AQU2.1.32348_001	AQU2.1.35711_001	AQU2.1.15313_001
AQU2.1.16335_001	AQU2.1.18372_001	AQU2.1.17902_001	AQU2.1.15160_001	AQU2.1.31883_001	AQU2.1.13947_001	AQU2.1.43936_001	AQU2.1.12209_001	AQU2.1.41352_001	AQU2.1.13044_001	AQU2.1.30273_001	AQU2.1.19425_001	AQU2.1.14611_001	AQU2.1.39866_001	AQU2.1.29942_001	AQU2.1.44498_001	AQU2.1.20979_001	AQU2.1.32159_001	AQU2.1.19662_001	AQU2.1.18257_001	AQU2.1.23705_001	AQU2.1.10958_001	AQU2.1.28634_001	AQU2.1.33169_001	AQU2.1.11178_001	AQU2.1.15011_001	AQU2.1.26502_001	AQU2.1.14338_001	AQU2.1.27098_001	AQU2.1.13224_001	AQU2.1.14877_001	AQU2.1.36724_001	AQU2.1.43988_001	AQU2.1.31335_001	AQU2.1.29644_001	AQU2.1.22670_001	AQU2.1.13828_001	AQU2.1.36821_001	AQU2.1.36136_001	AQU2.1.35610_001	AQU2.1.23977_001	AQU2.1.13697_001	AQU2.1.14579_001	AQU2.1.27993_001	AQU2.1.37703_001	AQU2.1.17208_001	AQU2.1.19421_001	AQU2.1.26606_001	AQU2.1.40508_001	AQU2.1.36039_001
AQU2.1.13986_001	AQU2.1.23205_001	AQU2.1.33897_001	AQU2.1.13900_001	AQU2.1.12333_001	AQU2.1.16625_001	AQU2.1.17560_001	AQU2.1.20063_001	AQU2.1.22568_001	AQU2.1.31164_001	AQU2.1.39089_001	AQU2.1.29613_001	AQU2.1.26444_001	AQU2.1.19491_001	AQU2.1.32402_001	AQU2.1.31738_001	AQU2.1.39533_001	AQU2.1.41843_001	AQU2.1.16826_001	AQU2.1.26216_001	AQU2.1.12175_001	AQU2.1.16997_001	AQU2.1.25938_001	AQU2.1.18556_001	AQU2.1.17460_001	AQU2.1.37216_001	AQU2.1.27954_001	AQU2.1.40790_001	AQU2.1.13727_001	AQU2.1.14303_001	AQU2.1.20685_001	AQU2.1.44269_001	AQU2.1.19956_001	AQU2.1.24324_001	AQU2.1.18850_001	AQU2.1.11135_001	AQU2.1.12095_001	AQU2.1.34280_001	AQU2.1.16699_001	AQU2.1.24316_001	AQU2.1.20042_001	AQU2.1.13719_001	AQU2.1.20944_001	AQU2.1.21059_001	AQU2.1.28622_001	AQU2.1.25373_001	AQU2.1.16725_001	AQU2.1.16369_001	AQU2.1.17275_001	AQU2.1.26940_001
AQU2.1.18201_001	AQU2.1.23559_001	AQU2.1.13288_001	AQU2.1.23516_001	AQU2.1.22564_001	AQU2.1.26440_001	AQU2.1.23666_001	AQU2.1.13819_001	AQU2.1.42533_001	AQU2.1.14733_001	AQU2.1.14268_001	AQU2.1.17866_001	AQU2.1.30480_001	AQU2.1.15799_001	AQU2.1.18244_001	AQU2.1.24172_001	AQU2.1.14189_001	AQU2.1.38128_001	AQU2.1.16341_001	AQU2.1.16892_001	AQU2.1.29494_001	AQU2.1.14018_001	AQU2.1.10942_001	AQU2.1.41260_001	AQU2.1.14540_001	AQU2.1.39955_001	AQU2.1.12311_001	AQU2.1.20901_001	AQU2.1.40315_001	AQU2.1.20103_001	AQU2.1.19913_001	AQU2.1.40773_001	AQU2.1.14346_001	AQU2.1.14281_001	AQU2.1.24391_001	AQU2.1.19999_001	AQU2.1.11372_001	AQU2.1.11003_001	AQU2.1.26081_001	AQU2.1.13232_001	AQU2.1.17585_001	AQU2.1.11801_001	AQU2.1.13360_001	AQU2.1.18105_001	AQU2.1.27520_001	AQU2.1.25369_001	AQU2.1.31971_001	AQU2.1.21411_001	AQU2.1.31843_001	AQU2.1.11476_001
AQU2.1.17783_001	AQU2.1.43567_001	AQU2.1.17153_001	AQU2.1.36944_001	AQU2.1.19758_001	AQU2.1.14901_001	AQU2.1.35608_001	AQU2.1.36759_001	AQU2.1.12382_001	AQU2.1.16619_001	AQU2.1.21780_001	AQU2.1.14716_001	AQU2.1.25084_001	AQU2.1.23512_001	AQU2.1.20659_001	AQU2.1.22073_001	AQU2.1.13921_001	AQU2.1.11805_001	AQU2.1.21795_001	AQU2.1.40154_001	AQU2.1.16832_001	AQU2.1.35149_001	AQU2.1.29349_001	AQU2.1.16704_001	AQU2.1.26375_001	AQU2.1.30418_001	AQU2.1.14583_001	AQU2.1.26197_001	AQU2.1.38345_001	AQU2.1.18125_001	AQU2.1.16532_001	AQU2.1.15956_001	AQU2.1.14923_001	AQU2.1.19352_001	AQU2.1.16613_001	AQU2.1.16435_001	AQU2.1.22979_001	AQU2.1.17484_001	AQU2.1.11763_001	AQU2.1.14745_001	AQU2.1.13453_001	AQU2.1.35525_001	AQU2.1.22182_001	AQU2.1.11844_001	AQU2.1.14601_001	AQU2.1.33432_001	AQU2.1.11941_001	AQU2.1.33157_001	AQU2.1.32043_001	AQU2.1.33319_001
AQU2.1.37634_001	AQU2.1.19431_001	AQU2.1.40259_001	AQU2.1.11220_001	AQU2.1.13631_001	AQU2.1.12967_001	AQU2.1.31505_001	AQU2.1.16262_001	AQU2.1.30860_001	AQU2.1.39644_001	AQU2.1.28270_001	AQU2.1.19933_001	AQU2.1.44263_001	AQU2.1.19681_001	AQU2.1.18287_001	AQU2.1.35595_001	AQU2.1.38591_001	AQU2.1.22950_001	AQU2.1.11700_001	AQU2.1.32973_001	AQU2.1.17409_001	AQU2.1.24367_001	AQU2.1.34760_001	AQU2.1.41155_001	AQU2.1.19751_001	AQU2.1.20553_001	AQU2.1.42005_001	AQU2.1.19638_001	AQU2.1.11824_001	AQU2.1.11727_001	AQU2.1.23519_001	AQU2.1.39076_001	AQU2.1.35126_001	AQU2.1.32160_001	AQU2.1.13771_001	AQU2.1.30470_001	AQU2.1.23334_001	AQU2.1.37355_001	AQU2.1.37807_001	AQU2.1.28979_001	AQU2.1.39207_001	AQU2.1.40734_001	AQU2.1.27865_001	AQU2.1.13514_001	AQU2.1.13417_001	AQU2.1.22340_001	AQU2.1.14806_001	AQU2.1.15557_001	AQU2.1.14265_001	AQU2.1.12994_001
AQU2.1.21101_001	AQU2.1.16580_001	AQU2.1.24012_001	AQU2.1.43059_001	AQU2.1.12348_001	AQU2.1.42866_001	AQU2.1.43874_001	AQU2.1.26301_001	AQU2.1.34305_001	AQU2.1.43703_001	AQU2.1.11425_001	AQU2.1.37688_001	AQU2.1.42951_001	AQU2.1.12540_001	AQU2.1.14117_001	AQU2.1.14141_001	AQU2.1.11151_001	AQU2.1.10915_001	AQU2.1.14028_001	AQU2.1.35726_001	AQU2.1.18753_001	AQU2.1.43236_001	AQU2.1.33045_001	AQU2.1.24219_001	AQU2.1.31266_001	AQU2.1.39130_001	AQU2.1.25381_001	AQU2.1.29520_001	AQU2.1.36864_001	AQU2.1.11697_001	AQU2.1.31622_001	AQU2.1.39509_001	AQU2.1.27136_001	AQU2.1.21977_001	AQU2.1.16709_001	AQU2.1.34853_001	AQU2.1.29091_001	AQU2.1.27628_001	AQU2.1.14358_001	AQU2.1.19561_001	AQU2.1.40610_001	AQU2.1.21736_001	AQU2.1.30198_001	AQU2.1.11279_001	AQU2.1.11554_001	AQU2.1.15023_001	AQU2.1.31765_001	AQU2.1.10978_001	AQU2.1.26328_001	AQU2.1.14900_001
AQU2.1.29667_001	AQU2.1.14782_001	AQU2.1.16044_001	AQU2.1.15808_001	AQU2.1.31053_001	AQU2.1.42447_001	AQU2.1.19727_001	AQU2.1.12842_001	AQU2.1.31231_001	AQU2.1.30566_001	AQU2.1.14532_001	AQU2.1.27977_001	AQU2.1.12214_001	AQU2.1.16559_001	AQU2.1.43651_001	AQU2.1.21466_001	AQU2.1.18249_001	AQU2.1.22944_001	AQU2.1.24634_001	AQU2.1.22405_001	AQU2.1.42900_001	AQU2.1.23695_001	AQU2.1.17224_001	AQU2.1.33017_001	AQU2.1.27504_001	AQU2.1.39495_001	AQU2.1.29393_001	AQU2.1.17941_001	AQU2.1.15623_001	AQU2.1.20417_001	AQU2.1.17828_001	AQU2.1.28255_001	AQU2.1.35335_001	AQU2.1.41848_001	AQU2.1.11704_001	AQU2.1.33049_001	AQU2.1.11219_001	AQU2.1.21796_001	AQU2.1.15049_001	AQU2.1.11936_001	AQU2.1.15766_001	AQU2.1.29709_001	AQU2.1.17480_001	AQU2.1.29337_001	AQU2.1.16616_001	AQU2.1.36384_001	AQU2.1.41291_001	AQU2.1.17995_001	AQU2.1.37951_001	AQU2.1.35609_001
AQU2.1.26820_001	AQU2.1.13542_001	AQU2.1.19085_001	AQU2.1.17492_001	AQU2.1.33649_001	AQU2.1.11255_001	AQU2.1.23822_001	AQU2.1.32373_001	AQU2.1.12628_001	AQU2.1.28886_001	AQU2.1.23725_001	AQU2.1.19488_001	AQU2.1.22649_001	AQU2.1.12331_001	AQU2.1.43929_001	AQU2.1.41280_001	AQU2.1.22352_001	AQU2.1.32276_001	AQU2.1.30442_001	AQU2.1.14350_001	AQU2.1.31162_001	AQU2.1.22158_001	AQU2.1.28751_001	AQU2.1.29221_001	AQU2.1.31227_001	AQU2.1.25591_001	AQU2.1.30201_001	AQU2.1.17154_001	AQU2.1.13871_001	AQU2.1.37561_001	AQU2.1.19006_001	AQU2.1.18277_001	AQU2.1.41345_001	AQU2.1.35927_001	AQU2.1.42788_001	AQU2.1.10873_001	AQU2.1.28395_001	AQU2.1.32864_001	AQU2.1.16105_001	AQU2.1.26232_001	AQU2.1.39316_001	AQU2.1.11996_001	AQU2.1.26038_001	AQU2.1.30586_001	AQU2.1.14021_001	AQU2.1.28289_001	AQU2.1.11264_001	AQU2.1.11093_001	AQU2.1.41780_001	AQU2.1.11755_001
AQU2.1.31022_001	AQU2.1.25248_001	AQU2.1.31995_001	AQU2.1.15960_001	AQU2.1.15074_001	AQU2.1.29698_001	AQU2.1.14854_001	AQU2.1.36739_001	AQU2.1.31464_001	AQU2.1.11597_001	AQU2.1.13015_001	AQU2.1.23590_001	AQU2.1.30784_001	AQU2.1.13643_001	AQU2.1.14064_001	AQU2.1.40177_001	AQU2.1.41372_001	AQU2.1.32474_001	AQU2.1.33050_001	AQU2.1.14911_001	AQU2.1.30187_001	AQU2.1.23462_001	AQU2.1.30415_001	AQU2.1.12432_001	AQU2.1.11050_001	AQU2.1.39246_001	AQU2.1.26460_001	AQU2.1.31425_001	AQU2.1.30082_001	AQU2.1.27641_001	AQU2.1.17620_001	AQU2.1.11010_001	AQU2.1.30311_001	AQU2.1.12045_001	AQU2.1.11728_001	AQU2.1.44154_001	AQU2.1.19019_001	AQU2.1.18426_001	AQU2.1.12207_001	AQU2.1.23090_001	AQU2.1.35125_001	AQU2.1.39190_001	AQU2.1.15140_001	AQU2.1.16851_001	AQU2.1.28803_001	AQU2.1.32360_001	AQU2.1.29410_001	AQU2.1.20763_001	AQU2.1.29300_001	AQU2.1.30687_001
AQU2.1.34361_001	AQU2.1.42781_001	AQU2.1.33650_001	AQU2.1.13058_001	AQU2.1.24905_001	AQU2.1.11448_001	AQU2.1.29655_001	AQU2.1.14625_001	AQU2.1.11465_001	AQU2.1.22947_001	AQU2.1.17944_001	AQU2.1.22215_001	AQU2.1.29664_001	AQU2.1.19554_001	AQU2.1.44036_001	AQU2.1.13081_001	AQU2.1.14598_001	AQU2.1.13308_001	AQU2.1.14696_001	AQU2.1.18237_001	AQU2.1.17259_001	AQU2.1.27635_001	AQU2.1.28517_001	AQU2.1.26657_001	AQU2.1.23861_001	AQU2.1.15328_001	AQU2.1.33785_001	AQU2.1.12667_001	AQU2.1.17929_001	AQU2.1.27539_001	AQU2.1.44286_001	AQU2.1.27501_001	AQU2.1.19939_001	AQU2.1.23927_001	AQU2.1.23579_001	AQU2.1.23668_001	AQU2.1.27153_001	AQU2.1.34700_001	AQU2.1.41296_001	AQU2.1.11939_001	AQU2.1.14223_001	AQU2.1.41723_001	AQU2.1.19037_001	AQU2.1.14140_001	AQU2.1.10940_001	AQU2.1.31249_001	AQU2.1.30699_001	AQU2.1.34435_001	AQU2.1.11322_001	AQU2.1.28267_001
AQU2.1.44702_001	AQU2.1.19097_001	AQU2.1.41879_001	AQU2.1.37193_001	AQU2.1.16358_001	AQU2.1.19782_001	AQU2.1.21578_001	AQU2.1.27407_001	AQU2.1.13336_001	AQU2.1.14903_001	AQU2.1.26638_001	AQU2.1.11791_001	AQU2.1.17553_001	AQU2.1.43167_001	AQU2.1.16447_001	AQU2.1.24778_001	AQU2.1.31447_001	AQU2.1.19082_001	AQU2.1.17368_001	AQU2.1.17901_001	AQU2.1.13449_001	AQU2.1.13030_001	AQU2.1.23914_001	AQU2.1.28254_001	AQU2.1.18072_001	AQU2.1.14918_001	AQU2.1.22258_001	AQU2.1.36740_001	AQU2.1.26894_001	AQU2.1.17410_001	AQU2.1.14459_001	AQU2.1.19541_001	AQU2.1.30607_001	AQU2.1.16084_001	AQU2.1.44258_001	AQU2.1.23759_001	AQU2.1.27101_001	AQU2.1.16349_001	AQU2.1.12084_001	AQU2.1.23396_001	AQU2.1.35521_001	AQU2.1.31069_001	AQU2.1.27005_001	AQU2.1.32764_001	AQU2.1.20201_001	AQU2.1.23625_001	AQU2.1.23066_001	AQU2.1.33646_001	AQU2.1.15363_001	AQU2.1.38849_001
AQU2.1.17502_001	AQU2.1.39421_001	AQU2.1.12377_001	AQU2.1.34296_001	AQU2.1.39218_001	AQU2.1.15812_001	AQU2.1.28905_001	AQU2.1.10890_001	AQU2.1.22682_001	AQU2.1.15546_001	AQU2.1.43856_001	AQU2.1.34046_001	AQU2.1.20726_001	AQU2.1.30272_001	AQU2.1.13259_001	AQU2.1.32365_001	AQU2.1.14610_001	AQU2.1.20564_001	AQU2.1.19093_001	AQU2.1.31726_001	AQU2.1.12323_001	AQU2.1.31073_001	AQU2.1.41353_001	AQU2.1.35203_001	AQU2.1.14416_001	AQU2.1.27451_001	AQU2.1.17959_001	AQU2.1.30078_001	AQU2.1.31719_001	AQU2.1.13185_001	AQU2.1.36824_001	AQU2.1.26900_001	AQU2.1.14495_001	AQU2.1.14398_001	AQU2.1.25430_001	AQU2.1.37400_001	AQU2.1.14673_001	AQU2.1.24597_001	AQU2.1.25333_001	AQU2.1.25317_001	AQU2.1.15949_001	AQU2.1.11594_001	AQU2.1.14639_001	AQU2.1.22666_001	AQU2.1.12314_001	AQU2.1.21437_001	AQU2.1.11175_001	AQU2.1.29945_001	AQU2.1.41594_001	AQU2.1.17556_001
AQU2.1.35730_001	AQU2.1.30430_001	AQU2.1.15341_001	AQU2.1.26557_001	AQU2.1.11511_001	AQU2.1.32845_001	AQU2.1.31609_001	AQU2.1.19766_001	AQU2.1.40435_001	AQU2.1.15219_001	AQU2.1.19678_001	AQU2.1.16293_001	AQU2.1.18555_001	AQU2.1.44339_001	AQU2.1.27953_001	AQU2.1.11565_001	AQU2.1.42882_001	AQU2.1.29830_001	AQU2.1.15945_001	AQU2.1.19460_001	AQU2.1.17045_001	AQU2.1.11499_001	AQU2.1.24658_001	AQU2.1.43047_001	AQU2.1.42521_001	AQU2.1.14734_001	AQU2.1.17892_001	AQU2.1.12647_001	AQU2.1.13973_001	AQU2.1.40960_001	AQU2.1.19566_001	AQU2.1.29781_001	AQU2.1.23447_001	AQU2.1.11655_001	AQU2.1.16582_001	AQU2.1.17000_001	AQU2.1.13126_001	AQU2.1.17673_001	AQU2.1.30745_001	AQU2.1.29740_001	AQU2.1.19661_001	AQU2.1.42969_001	AQU2.1.33011_001	AQU2.1.11639_001	AQU2.1.29643_001	AQU2.1.33885_001	AQU2.1.15114_001	AQU2.1.15098_001	AQU2.1.19953_001	AQU2.1.24716_001
AQU2.1.36954_001	AQU2.1.22650_001	AQU2.1.21102_001	AQU2.1.11981_001	AQU2.1.17302_001	AQU2.1.31451_001	AQU2.1.11868_001	AQU2.1.13469_001	AQU2.1.11223_001	AQU2.1.15770_001	AQU2.1.33964_001	AQU2.1.20767_001	AQU2.1.15568_001	AQU2.1.21414_001	AQU2.1.25803_001	AQU2.1.40253_001	AQU2.1.15094_001	AQU2.1.12094_001	AQU2.1.19957_001	AQU2.1.40318_001	AQU2.1.27902_001	AQU2.1.16233_001	AQU2.1.35733_001	AQU2.1.15262_001	AQU2.1.43894_001	AQU2.1.27449_001	AQU2.1.13493_001	AQU2.1.36847_001	AQU2.1.22127_001	AQU2.1.30806_001	AQU2.1.11286_001	AQU2.1.32565_001	AQU2.1.30412_001	AQU2.1.27645_001	AQU2.1.37747_001	AQU2.1.15764_001	AQU2.1.23345_001	AQU2.1.15592_001	AQU2.1.26256_001	AQU2.1.38137_001	AQU2.1.25044_001	AQU2.1.34668_001	AQU2.1.35057_001	AQU2.1.11562_001	AQU2.1.38412_001	AQU2.1.27956_001	AQU2.1.42273_001	AQU2.1.18030_001	AQU2.1.19820_001	AQU2.1.11538_001
AQU2.1.12681_001	AQU2.1.23900_001	AQU2.1.23897_001	AQU2.1.29218_001	AQU2.1.21579_001	AQU2.1.14086_001	AQU2.1.41261_001	AQU2.1.13939_001	AQU2.1.43898_001	AQU2.1.27147_001	AQU2.1.20732_001	AQU2.1.34753_001	AQU2.1.19572_001	AQU2.1.28996_001	AQU2.1.27534_001	AQU2.1.26750_001	AQU2.1.11004_001	AQU2.1.12294_001	AQU2.1.36741_001	AQU2.1.32369_001	AQU2.1.17495_001	AQU2.1.19459_001	AQU2.1.11477_001	AQU2.1.20256_001	AQU2.1.14756_001	AQU2.1.24319_001	AQU2.1.26637_001	AQU2.1.14217_001	AQU2.1.29548_001	AQU2.1.19096_001	AQU2.1.16014_001	AQU2.1.17667_001	AQU2.1.14588_001	AQU2.1.11058_001	AQU2.1.14499_001	AQU2.1.31731_001	AQU2.1.31083_001	AQU2.1.31172_001	AQU2.1.11502_001	AQU2.1.13465_001	AQU2.1.12625_001	AQU2.1.21436_001	AQU2.1.25885_001	AQU2.1.11873_001	AQU2.1.35448_001	AQU2.1.15308_001	AQU2.1.12429_001	AQU2.1.22276_001	AQU2.1.40959_001	AQU2.1.27873_001
No annotations were retrieved for the following entities:
AQU2.1.14672_001	AQU2.1.16265_001	AQU2.1.14575_001	AQU2.1.26383_001	AQU2.1.36469_001	AQU2.1.26545_001	AQU2.1.16184_001	AQU2.1.26367_001	AQU2.1.21519_001	AQU2.1.13186_001	AQU2.1.11771_001	AQU2.1.11593_001	AQU2.1.29187_001	AQU2.1.26820_001	AQU2.1.13542_001	AQU2.1.31002_001	AQU2.1.19085_001	AQU2.1.22271_001	AQU2.1.22174_001	AQU2.1.37304_001	AQU2.1.33649_001	AQU2.1.23822_001	AQU2.1.32373_001	AQU2.1.23725_001	AQU2.1.42475_001	AQU2.1.11433_001	AQU2.1.22649_001	AQU2.1.11530_001	AQU2.1.22352_001	AQU2.1.29946_001	AQU2.1.40285_001	AQU2.1.31162_001	AQU2.1.14172_001	AQU2.1.22158_001	AQU2.1.28751_001	AQU2.1.40188_001	AQU2.1.31227_001	AQU2.1.38853_001	AQU2.1.30201_001	AQU2.1.17154_001	AQU2.1.13871_001	AQU2.1.37561_001	AQU2.1.18277_001	AQU2.1.12385_001	AQU2.1.35927_001	AQU2.1.42788_001	AQU2.1.10873_001	AQU2.1.28395_001	AQU2.1.39316_001	AQU2.1.13758_001
AQU2.1.13774_001	AQU2.1.34286_001	AQU2.1.12617_001	AQU2.1.19103_001	AQU2.1.12392_001	AQU2.1.20655_001	AQU2.1.30431_001	AQU2.1.20727_001	AQU2.1.13618_001	AQU2.1.18144_001	AQU2.1.25983_001	AQU2.1.16691_001	AQU2.1.33156_001	AQU2.1.22816_001	AQU2.1.18293_001	AQU2.1.19173_001	AQU2.1.37784_001	AQU2.1.20119_001	AQU2.1.11521_001	AQU2.1.16335_001	AQU2.1.18372_001	AQU2.1.17902_001	AQU2.1.30568_001	AQU2.1.15160_001	AQU2.1.11190_001	AQU2.1.12209_001	AQU2.1.44658_001	AQU2.1.13044_001	AQU2.1.31074_001	AQU2.1.38290_001	AQU2.1.20723_001	AQU2.1.22685_001	AQU2.1.29942_001	AQU2.1.44498_001	AQU2.1.21040_001	AQU2.1.11194_001	AQU2.1.19662_001	AQU2.1.18257_001	AQU2.1.14796_001	AQU2.1.13240_001	AQU2.1.12664_001	AQU2.1.15011_001	AQU2.1.26502_001	AQU2.1.31495_001	AQU2.1.27098_001	AQU2.1.23520_001	AQU2.1.14877_001	AQU2.1.36724_001	AQU2.1.26428_001	AQU2.1.40033_001
AQU2.1.34761_001	AQU2.1.17807_001	AQU2.1.35700_001	AQU2.1.15086_001	AQU2.1.12304_001	AQU2.1.13312_001	AQU2.1.40075_001	AQU2.1.29757_001	AQU2.1.31550_001	AQU2.1.39532_001	AQU2.1.13098_001	AQU2.1.42063_001	AQU2.1.22224_001	AQU2.1.29356_001	AQU2.1.36737_001	AQU2.1.34806_001	AQU2.1.30786_001	AQU2.1.35429_001	AQU2.1.38123_001	AQU2.1.33095_001	AQU2.1.19637_001	AQU2.1.40476_001	AQU2.1.23031_001	AQU2.1.15200_001	AQU2.1.13155_001	AQU2.1.16553_001	AQU2.1.43044_001	AQU2.1.13456_001	AQU2.1.12376_001	AQU2.1.33782_001	AQU2.1.11325_001	AQU2.1.36650_001	AQU2.1.29255_001	AQU2.1.13986_001	AQU2.1.33897_001	AQU2.1.12333_001	AQU2.1.16625_001	AQU2.1.44611_001	AQU2.1.31209_001	AQU2.1.17560_001	AQU2.1.24770_001	AQU2.1.31164_001	AQU2.1.17706_001	AQU2.1.39089_001	AQU2.1.22453_001	AQU2.1.31236_001	AQU2.1.32402_001	AQU2.1.31738_001	AQU2.1.15989_001	AQU2.1.38139_001
AQU2.1.34509_001	AQU2.1.15076_001	AQU2.1.27793_001	AQU2.1.22945_001	AQU2.1.11742_001	AQU2.1.19467_001	AQU2.1.23925_001	AQU2.1.12078_001	AQU2.1.22277_001	AQU2.1.29610_001	AQU2.1.30189_001	AQU2.1.12035_001	AQU2.1.13602_001	AQU2.1.26870_001	AQU2.1.34022_001	AQU2.1.12291_001	AQU2.1.12120_001	AQU2.1.10914_001	AQU2.1.25811_001	AQU2.1.15620_001	AQU2.1.22279_001	AQU2.1.37176_001	AQU2.1.18493_001	AQU2.1.13681_001	AQU2.1.38921_001	AQU2.1.40200_001	AQU2.1.39036_001	AQU2.1.39042_001	AQU2.1.15728_001	AQU2.1.18418_001	AQU2.1.15533_001	AQU2.1.17029_001	AQU2.1.28617_001	AQU2.1.28593_001	AQU2.1.18467_001	AQU2.1.17759_001	AQU2.1.25419_001	AQU2.1.13071_001	AQU2.1.22858_001	AQU2.1.11035_001	AQU2.1.20955_001	AQU2.1.31052_001	AQU2.1.12693_001	AQU2.1.35145_001	AQU2.1.19519_001	AQU2.1.30324_001	AQU2.1.15935_001	AQU2.1.26583_001	AQU2.1.11385_001	AQU2.1.26540_001
AQU2.1.34499_001	AQU2.1.16502_001	AQU2.1.24850_001	AQU2.1.12082_001	AQU2.1.23283_001	AQU2.1.27131_001	AQU2.1.15695_001	AQU2.1.37309_001	AQU2.1.20314_001	AQU2.1.39410_001	AQU2.1.16530_001	AQU2.1.42901_001	AQU2.1.36459_001	AQU2.1.38919_001	AQU2.1.23340_001	AQU2.1.17412_001	AQU2.1.11274_001	AQU2.1.14701_001	AQU2.1.17655_001	AQU2.1.12728_001	AQU2.1.33905_001	AQU2.1.35362_001	AQU2.1.10868_001	AQU2.1.18248_001	AQU2.1.24791_001	AQU2.1.15939_001	AQU2.1.13290_001	AQU2.1.14744_001	AQU2.1.21724_001	AQU2.1.35621_001	AQU2.1.35249_001	AQU2.1.15493_001	AQU2.1.21580_001	AQU2.1.19515_001	AQU2.1.27961_001	AQU2.1.12126_001	AQU2.1.21122_001	AQU2.1.44660_001	AQU2.1.37695_001	AQU2.1.28813_001	AQU2.1.23068_001	AQU2.1.37652_001	AQU2.1.36601_001	AQU2.1.10896_001	AQU2.1.13764_001	AQU2.1.31458_001	AQU2.1.29577_001	AQU2.1.17998_001	AQU2.1.17912_001	AQU2.1.18578_001
AQU2.1.25297_001	AQU2.1.28466_001	AQU2.1.40437_001	AQU2.1.12208_001	AQU2.1.37296_001	AQU2.1.26821_001	AQU2.1.25610_001	AQU2.1.13374_001	AQU2.1.44085_001	AQU2.1.16255_001	AQU2.1.15785_001	AQU2.1.16212_001	AQU2.1.15080_001	AQU2.1.22659_001	AQU2.1.34285_001	AQU2.1.16336_001	AQU2.1.36610_001	AQU2.1.28993_001	AQU2.1.12163_001	AQU2.1.14574_001	AQU2.1.18371_001	AQU2.1.26535_001	AQU2.1.18875_001	AQU2.1.26708_001	AQU2.1.14531_001	AQU2.1.20760_001	AQU2.1.34638_001	AQU2.1.21714_001	AQU2.1.32176_001	AQU2.1.29625_001	AQU2.1.12037_001	AQU2.1.44421_001	AQU2.1.13223_001	AQU2.1.22943_001	AQU2.1.25828_001	AQU2.1.16541_001	AQU2.1.11614_001	AQU2.1.31046_001	AQU2.1.11020_001	AQU2.1.20978_001	AQU2.1.14754_001	AQU2.1.19280_001	AQU2.1.10957_001	AQU2.1.11479_001	AQU2.1.17716_001	AQU2.1.14497_001	AQU2.1.32534_001	AQU2.1.14675_001	AQU2.1.41819_001	AQU2.1.23724_001
AQU2.1.16138_001	AQU2.1.20922_001	AQU2.1.20566_001	AQU2.1.38782_001	AQU2.1.37704_001	AQU2.1.22655_001	AQU2.1.23735_001	AQU2.1.18740_001	AQU2.1.36723_001	AQU2.1.14909_001	AQU2.1.33695_001	AQU2.1.28148_001	AQU2.1.26945_001	AQU2.1.15343_001	AQU2.1.42895_001	AQU2.1.25623_001	AQU2.1.41970_001	AQU2.1.30684_001	AQU2.1.15947_001	AQU2.1.35658_001	AQU2.1.10973_001	AQU2.1.26172_001	AQU2.1.18384_001	AQU2.1.23978_001	AQU2.1.17205_001	AQU2.1.18884_001	AQU2.1.26501_001	AQU2.1.36522_001	AQU2.1.29943_001	AQU2.1.36664_001	AQU2.1.30328_001	AQU2.1.15258_001	AQU2.1.14436_001	AQU2.1.40032_001	AQU2.1.32372_001	AQU2.1.13140_001	AQU2.1.18312_001	AQU2.1.17304_001	AQU2.1.29528_001	AQU2.1.13241_001	AQU2.1.22511_001	AQU2.1.41470_001	AQU2.1.13556_001	AQU2.1.14179_001	AQU2.1.17475_001	AQU2.1.38881_001	AQU2.1.22610_001	AQU2.1.40349_001	AQU2.1.16467_001	AQU2.1.14491_001
AQU2.1.16820_001	AQU2.1.26761_001	AQU2.1.34944_001	AQU2.1.23673_001	AQU2.1.35350_001	AQU2.1.36706_001	AQU2.1.36749_001	AQU2.1.25461_001	AQU2.1.32405_001	AQU2.1.15068_001	AQU2.1.12996_001	AQU2.1.12944_001	AQU2.1.12801_001	AQU2.1.15025_001	AQU2.1.15012_001	AQU2.1.39007_001	AQU2.1.23488_001	AQU2.1.33179_001	AQU2.1.22644_001	AQU2.1.34114_001	AQU2.1.15106_001	AQU2.1.18747_001	AQU2.1.17950_001	AQU2.1.21162_001	AQU2.1.33490_001	AQU2.1.12116_001	AQU2.1.28357_001	AQU2.1.13897_001	AQU2.1.40896_001	AQU2.1.39852_001	AQU2.1.29924_001	AQU2.1.19044_001	AQU2.1.35805_001	AQU2.1.19548_001	AQU2.1.26578_001	AQU2.1.11490_001	AQU2.1.14704_001	AQU2.1.17730_001	AQU2.1.20104_001	AQU2.1.14088_001	AQU2.1.44693_001	AQU2.1.15355_001	AQU2.1.31427_001	AQU2.1.13789_001	AQU2.1.16922_001	AQU2.1.11241_001	AQU2.1.12772_001	AQU2.1.27992_001	AQU2.1.23343_001	AQU2.1.15683_001
AQU2.1.16344_001	AQU2.1.15323_001	AQU2.1.11230_001	AQU2.1.16976_001	AQU2.1.44305_001	AQU2.1.29061_001	AQU2.1.30790_001	AQU2.1.12112_001	AQU2.1.37853_001	AQU2.1.17897_001	AQU2.1.12227_001	AQU2.1.14015_001	AQU2.1.30421_001	AQU2.1.16731_001	AQU2.1.36758_001	AQU2.1.23011_001	AQU2.1.25401_001	AQU2.1.25444_001	AQU2.1.31470_001	AQU2.1.19644_001	AQU2.1.21623_001	AQU2.1.13950_001	AQU2.1.12127_001	AQU2.1.12255_001	AQU2.1.13491_001	AQU2.1.15810_001	AQU2.1.12383_001	AQU2.1.23654_001	AQU2.1.39252_001	AQU2.1.12396_001	AQU2.1.27319_001	AQU2.1.25429_001	AQU2.1.29433_001	AQU2.1.35822_001	AQU2.1.38874_001	AQU2.1.17582_001	AQU2.1.13363_001	AQU2.1.22218_001	AQU2.1.31672_001	AQU2.1.26880_001	AQU2.1.26422_001	AQU2.1.20041_001	AQU2.1.14258_001	AQU2.1.20686_001	AQU2.1.30206_001	AQU2.1.11304_001	AQU2.1.18406_001	AQU2.1.27173_001	AQU2.1.37666_001	AQU2.1.21092_001
GO-ID	p-value	corr p-value	x	n	X	N	Description	Genes in test set
9117	2.1697e-19	5.0879e-16	149	747	1871	19944	nucleotide metabolic process	AQU2.1.35248_001|AQU2.1.25790_001|AQU2.1.26103_001|AQU2.1.39866_001|AQU2.1.19409_001|AQU2.1.34426_001|AQU2.1.20901_001|AQU2.1.23596_001|AQU2.1.11257_001|AQU2.1.29908_001|AQU2.1.25456_001|AQU2.1.24616_001|AQU2.1.10982_001|AQU2.1.33010_001|AQU2.1.29462_001|AQU2.1.12958_001|AQU2.1.17117_001|AQU2.1.33045_001|AQU2.1.32363_001|AQU2.1.29330_001|AQU2.1.31292_001|AQU2.1.25431_001|AQU2.1.22405_001|AQU2.1.2…
6753	5.3247e-19	6.2433e-16	149	754	1871	19944	nucleoside phosphate metabolic process	AQU2.1.35248_001|AQU2.1.25790_001|AQU2.1.26103_001|AQU2.1.39866_001|AQU2.1.19409_001|AQU2.1.34426_001|AQU2.1.20901_001|AQU2.1.23596_001|AQU2.1.11257_001|AQU2.1.29908_001|AQU2.1.25456_001|AQU2.1.24616_001|AQU2.1.10982_001|AQU2.1.33010_001|AQU2.1.29462_001|AQU2.1.12958_001|AQU2.1.17117_001|AQU2.1.33045_001|AQU2.1.32363_001|AQU2.1.29330_001|AQU2.1.31292_001|AQU2.1.25431_001|AQU2.1.22405_001|AQU2.1.2…
55086	4.2431e-18	2.8547e-15	165	890	1871	19944	nucleobase-containing small molecule metabolic process	AQU2.1.26561_001|AQU2.1.35248_001|AQU2.1.25790_001|AQU2.1.26103_001|AQU2.1.39866_001|AQU2.1.19409_001|AQU2.1.34426_001|AQU2.1.20901_001|AQU2.1.23596_001|AQU2.1.11257_001|AQU2.1.29908_001|AQU2.1.25456_001|AQU2.1.24616_001|AQU2.1.10982_001|AQU2.1.33010_001|AQU2.1.14923_001|AQU2.1.11003_001|AQU2.1.29462_001|AQU2.1.12958_001|AQU2.1.16891_001|AQU2.1.17117_001|AQU2.1.33045_001|AQU2.1.32363_001|AQU2.1.2…
9165	4.8695e-18	2.8547e-15	96	403	1871	19944	nucleotide biosynthetic process	AQU2.1.17302_001|AQU2.1.25790_001|AQU2.1.26103_001|AQU2.1.34426_001|AQU2.1.20901_001|AQU2.1.23596_001|AQU2.1.11257_001|AQU2.1.34425_001|AQU2.1.25456_001|AQU2.1.16426_001|AQU2.1.15876_001|AQU2.1.25430_001|AQU2.1.11876_001|AQU2.1.33010_001|AQU2.1.12958_001|AQU2.1.17117_001|AQU2.1.28465_001|AQU2.1.32363_001|AQU2.1.23597_001|AQU2.1.26597_001|AQU2.1.25431_001|AQU2.1.17118_001|AQU2.1.22394_001|AQU2.1.2…
1901293	9.8626e-18	4.6256e-15	96	407	1871	19944	nucleoside phosphate biosynthetic process	AQU2.1.17302_001|AQU2.1.25790_001|AQU2.1.26103_001|AQU2.1.34426_001|AQU2.1.20901_001|AQU2.1.23596_001|AQU2.1.11257_001|AQU2.1.34425_001|AQU2.1.25456_001|AQU2.1.16426_001|AQU2.1.15876_001|AQU2.1.25430_001|AQU2.1.11876_001|AQU2.1.33010_001|AQU2.1.12958_001|AQU2.1.17117_001|AQU2.1.28465_001|AQU2.1.32363_001|AQU2.1.23597_001|AQU2.1.26597_001|AQU2.1.25431_001|AQU2.1.17118_001|AQU2.1.22394_001|AQU2.1.2…
9199	1.7482e-17	6.8325e-15	105	470	1871	19944	ribonucleoside triphosphate metabolic process	AQU2.1.35248_001|AQU2.1.25790_001|AQU2.1.26103_001|AQU2.1.39866_001|AQU2.1.34426_001|AQU2.1.20901_001|AQU2.1.23596_001|AQU2.1.11257_001|AQU2.1.33010_001|AQU2.1.12958_001|AQU2.1.17117_001|AQU2.1.32363_001|AQU2.1.31292_001|AQU2.1.25431_001|AQU2.1.26881_001|AQU2.1.13453_001|AQU2.1.15877_001|AQU2.1.32149_001|AQU2.1.25436_001|AQU2.1.43929_001|AQU2.1.34810_001|AQU2.1.25438_001|AQU2.1.26083_001|AQU2.1.4…
9141	4.4865e-17	1.503e-14	105	476	1871	19944	nucleoside triphosphate metabolic process	AQU2.1.35248_001|AQU2.1.25790_001|AQU2.1.26103_001|AQU2.1.39866_001|AQU2.1.34426_001|AQU2.1.20901_001|AQU2.1.23596_001|AQU2.1.11257_001|AQU2.1.33010_001|AQU2.1.12958_001|AQU2.1.17117_001|AQU2.1.32363_001|AQU2.1.31292_001|AQU2.1.25431_001|AQU2.1.26881_001|AQU2.1.13453_001|AQU2.1.15877_001|AQU2.1.32149_001|AQU2.1.25436_001|AQU2.1.43929_001|AQU2.1.34810_001|AQU2.1.25438_001|AQU2.1.26083_001|AQU2.1.4…
9119	2.5176e-16	7.3797e-14	109	515	1871	19944	ribonucleoside metabolic process	AQU2.1.35248_001|AQU2.1.25790_001|AQU2.1.26103_001|AQU2.1.39866_001|AQU2.1.34426_001|AQU2.1.20901_001|AQU2.1.23596_001|AQU2.1.11257_001|AQU2.1.33010_001|AQU2.1.12958_001|AQU2.1.17117_001|AQU2.1.32363_001|AQU2.1.31292_001|AQU2.1.25431_001|AQU2.1.26881_001|AQU2.1.13453_001|AQU2.1.15877_001|AQU2.1.32149_001|AQU2.1.25436_001|AQU2.1.43929_001|AQU2.1.12676_001|AQU2.1.34810_001|AQU2.1.25438_001|AQU2.1.2…
9116	3.6868e-16	9.6061e-14	117	574	1871	19944	nucleoside metabolic process	AQU2.1.26561_001|AQU2.1.35248_001|AQU2.1.25790_001|AQU2.1.26103_001|AQU2.1.39866_001|AQU2.1.34426_001|AQU2.1.20901_001|AQU2.1.23596_001|AQU2.1.11257_001|AQU2.1.33010_001|AQU2.1.12958_001|AQU2.1.16891_001|AQU2.1.17117_001|AQU2.1.32363_001|AQU2.1.31292_001|AQU2.1.25431_001|AQU2.1.26881_001|AQU2.1.13453_001|AQU2.1.15877_001|AQU2.1.32149_001|AQU2.1.25436_001|AQU2.1.43929_001|AQU2.1.12676_001|AQU2.1.3…
1901657	6.1624e-16	1.4451e-13	118	585	1871	19944	glycosyl compound metabolic process	AQU2.1.26561_001|AQU2.1.35248_001|AQU2.1.25790_001|AQU2.1.26103_001|AQU2.1.39866_001|AQU2.1.34426_001|AQU2.1.20901_001|AQU2.1.23596_001|AQU2.1.11257_001|AQU2.1.33010_001|AQU2.1.12958_001|AQU2.1.16891_001|AQU2.1.17117_001|AQU2.1.32363_001|AQU2.1.31292_001|AQU2.1.25431_001|AQU2.1.26881_001|AQU2.1.13453_001|AQU2.1.15877_001|AQU2.1.32149_001|AQU2.1.25436_001|AQU2.1.43929_001|AQU2.1.12676_001|AQU2.1.3…
9259	7.8196e-16	1.667e-13	107	509	1871	19944	ribonucleotide metabolic process	AQU2.1.35248_001|AQU2.1.25790_001|AQU2.1.26103_001|AQU2.1.39866_001|AQU2.1.34426_001|AQU2.1.20901_001|AQU2.1.23596_001|AQU2.1.11257_001|AQU2.1.33010_001|AQU2.1.12958_001|AQU2.1.17117_001|AQU2.1.32363_001|AQU2.1.31292_001|AQU2.1.25431_001|AQU2.1.26881_001|AQU2.1.13453_001|AQU2.1.15877_001|AQU2.1.32149_001|AQU2.1.25436_001|AQU2.1.43929_001|AQU2.1.12676_001|AQU2.1.34810_001|AQU2.1.25438_001|AQU2.1.2…
19693	4.099e-15	8.0101e-13	108	528	1871	19944	ribose phosphate metabolic process	AQU2.1.35248_001|AQU2.1.25790_001|AQU2.1.26103_001|AQU2.1.39866_001|AQU2.1.19409_001|AQU2.1.34426_001|AQU2.1.20901_001|AQU2.1.23596_001|AQU2.1.11257_001|AQU2.1.33010_001|AQU2.1.12958_001|AQU2.1.17117_001|AQU2.1.32363_001|AQU2.1.31292_001|AQU2.1.25431_001|AQU2.1.26881_001|AQU2.1.13453_001|AQU2.1.15877_001|AQU2.1.32149_001|AQU2.1.25436_001|AQU2.1.43929_001|AQU2.1.12676_001|AQU2.1.34810_001|AQU2.1.2…
19637	1.0415e-13	1.8787e-11	162	967	1871	19944	organophosphate metabolic process	AQU2.1.35248_001|AQU2.1.25790_001|AQU2.1.26103_001|AQU2.1.39866_001|AQU2.1.19409_001|AQU2.1.34426_001|AQU2.1.20901_001|AQU2.1.23596_001|AQU2.1.11257_001|AQU2.1.29908_001|AQU2.1.12638_001|AQU2.1.25456_001|AQU2.1.24616_001|AQU2.1.10982_001|AQU2.1.33010_001|AQU2.1.29462_001|AQU2.1.12958_001|AQU2.1.17117_001|AQU2.1.33045_001|AQU2.1.32363_001|AQU2.1.29330_001|AQU2.1.36177_001|AQU2.1.31292_001|AQU2.1.2…
90407	7.1048e-13	1.1901e-10	102	525	1871	19944	organophosphate biosynthetic process	AQU2.1.25790_001|AQU2.1.26103_001|AQU2.1.34426_001|AQU2.1.20901_001|AQU2.1.23596_001|AQU2.1.11257_001|AQU2.1.25456_001|AQU2.1.33010_001|AQU2.1.12958_001|AQU2.1.17117_001|AQU2.1.32363_001|AQU2.1.36177_001|AQU2.1.25431_001|AQU2.1.26881_001|AQU2.1.13453_001|AQU2.1.15877_001|AQU2.1.32149_001|AQU2.1.25436_001|AQU2.1.43929_001|AQU2.1.22683_001|AQU2.1.12676_001|AQU2.1.34810_001|AQU2.1.25438_001|AQU2.1.2…
44763	5.4661e-10	8.5453e-08	1056	9915	1871	19944	single-organism cellular process	AQU2.1.30418_001|AQU2.1.26561_001|AQU2.1.38256_001|AQU2.1.19409_001|AQU2.1.16354_001|AQU2.1.14478_001|AQU2.1.16532_001|AQU2.1.14664_001|AQU2.1.11506_001|AQU2.1.14923_001|AQU2.1.11496_001|AQU2.1.18206_001|AQU2.1.36825_001|AQU2.1.21792_001|AQU2.1.16613_001|AQU2.1.29462_001|AQU2.1.12958_001|AQU2.1.16516_001|AQU2.1.16435_001|AQU2.1.25431_001|AQU2.1.23652_001|AQU2.1.40536_001|AQU2.1.13453_001|AQU2.1.2…
44699	9.6888e-09	1.42e-06	1199	11567	1871	19944	single-organism process	AQU2.1.30418_001|AQU2.1.26561_001|AQU2.1.38256_001|AQU2.1.19409_001|AQU2.1.16354_001|AQU2.1.14478_001|AQU2.1.16532_001|AQU2.1.14664_001|AQU2.1.11506_001|AQU2.1.14923_001|AQU2.1.11496_001|AQU2.1.18206_001|AQU2.1.36825_001|AQU2.1.21792_001|AQU2.1.16613_001|AQU2.1.29462_001|AQU2.1.12958_001|AQU2.1.16516_001|AQU2.1.16435_001|AQU2.1.25431_001|AQU2.1.23652_001|AQU2.1.40536_001|AQU2.1.13453_001|AQU2.1.2…
1901135	1.9284e-08	2.66e-06	147	1000	1871	19944	carbohydrate derivative metabolic process	AQU2.1.26561_001|AQU2.1.35248_001|AQU2.1.25790_001|AQU2.1.26103_001|AQU2.1.39866_001|AQU2.1.19409_001|AQU2.1.34426_001|AQU2.1.20901_001|AQU2.1.23596_001|AQU2.1.11257_001|AQU2.1.43570_001|AQU2.1.33010_001|AQU2.1.12958_001|AQU2.1.12321_001|AQU2.1.16891_001|AQU2.1.17117_001|AQU2.1.32363_001|AQU2.1.36177_001|AQU2.1.31292_001|AQU2.1.25431_001|AQU2.1.26881_001|AQU2.1.13453_001|AQU2.1.15877_001|AQU2.1.1…
34654	3.4215e-08	4.4575e-06	119	772	1871	19944	nucleobase-containing compound biosynthetic process	AQU2.1.25790_001|AQU2.1.26103_001|AQU2.1.34426_001|AQU2.1.20901_001|AQU2.1.23596_001|AQU2.1.11257_001|AQU2.1.25456_001|AQU2.1.33010_001|AQU2.1.12958_001|AQU2.1.17117_001|AQU2.1.32363_001|AQU2.1.25431_001|AQU2.1.26881_001|AQU2.1.13453_001|AQU2.1.15877_001|AQU2.1.32149_001|AQU2.1.25436_001|AQU2.1.43929_001|AQU2.1.12676_001|AQU2.1.34810_001|AQU2.1.19526_001|AQU2.1.25438_001|AQU2.1.17832_001|AQU2.1.2…
18130	1.3704e-07	1.6914e-05	132	902	1871	19944	heterocycle biosynthetic process	AQU2.1.25790_001|AQU2.1.26103_001|AQU2.1.34426_001|AQU2.1.16354_001|AQU2.1.20901_001|AQU2.1.23596_001|AQU2.1.11257_001|AQU2.1.25456_001|AQU2.1.32248_001|AQU2.1.33010_001|AQU2.1.12958_001|AQU2.1.17117_001|AQU2.1.32363_001|AQU2.1.25431_001|AQU2.1.26881_001|AQU2.1.13453_001|AQU2.1.15877_001|AQU2.1.32149_001|AQU2.1.25436_001|AQU2.1.43929_001|AQU2.1.12676_001|AQU2.1.34810_001|AQU2.1.18247_001|AQU2.1.1…
19438	1.6846e-07	1.9752e-05	128	871	1871	19944	aromatic compound biosynthetic process	AQU2.1.25790_001|AQU2.1.26103_001|AQU2.1.34426_001|AQU2.1.16354_001|AQU2.1.20901_001|AQU2.1.23596_001|AQU2.1.11257_001|AQU2.1.25456_001|AQU2.1.32248_001|AQU2.1.33010_001|AQU2.1.12958_001|AQU2.1.17117_001|AQU2.1.32363_001|AQU2.1.25431_001|AQU2.1.26881_001|AQU2.1.13453_001|AQU2.1.15877_001|AQU2.1.32149_001|AQU2.1.25436_001|AQU2.1.43929_001|AQU2.1.12676_001|AQU2.1.34810_001|AQU2.1.19526_001|AQU2.1.2…
1901362	1.1887e-06	0.00013274	134	955	1871	19944	organic cyclic compound biosynthetic process	AQU2.1.25790_001|AQU2.1.26103_001|AQU2.1.34426_001|AQU2.1.16354_001|AQU2.1.20901_001|AQU2.1.23596_001|AQU2.1.11257_001|AQU2.1.25456_001|AQU2.1.32248_001|AQU2.1.33010_001|AQU2.1.12958_001|AQU2.1.17117_001|AQU2.1.32363_001|AQU2.1.25431_001|AQU2.1.26881_001|AQU2.1.13453_001|AQU2.1.15877_001|AQU2.1.32149_001|AQU2.1.25436_001|AQU2.1.43929_001|AQU2.1.12676_001|AQU2.1.34810_001|AQU2.1.18247_001|AQU2.1.1…
15700	4.3573e-06	0.00046444	6	7	1871	19944	arsenite transport	AQU2.1.40318_001|AQU2.1.28257_001|AQU2.1.40315_001|AQU2.1.28254_001|AQU2.1.40319_001|AQU2.1.28258_001
44711	5.4646e-06	0.00055715	133	974	1871	19944	single-organism biosynthetic process	AQU2.1.25790_001|AQU2.1.26103_001|AQU2.1.34426_001|AQU2.1.16354_001|AQU2.1.20901_001|AQU2.1.23596_001|AQU2.1.11257_001|AQU2.1.25456_001|AQU2.1.32248_001|AQU2.1.33010_001|AQU2.1.12958_001|AQU2.1.17117_001|AQU2.1.32363_001|AQU2.1.36177_001|AQU2.1.31292_001|AQU2.1.25431_001|AQU2.1.26881_001|AQU2.1.13453_001|AQU2.1.15877_001|AQU2.1.14712_001|AQU2.1.32149_001|AQU2.1.25436_001|AQU2.1.43929_001|AQU2.1.2…
6796	9.0872e-06	0.00088789	334	2877	1871	19944	phosphate-containing compound metabolic process	AQU2.1.26103_001|AQU2.1.39866_001|AQU2.1.19409_001|AQU2.1.34426_001|AQU2.1.20901_001|AQU2.1.43392_001|AQU2.1.42005_001|AQU2.1.10958_001|AQU2.1.10982_001|AQU2.1.11372_001|AQU2.1.33010_001|AQU2.1.11496_001|AQU2.1.36825_001|AQU2.1.29462_001|AQU2.1.12958_001|AQU2.1.14648_001|AQU2.1.11178_001|AQU2.1.26898_001|AQU2.1.33045_001|AQU2.1.26901_001|AQU2.1.29330_001|AQU2.1.29829_001|AQU2.1.25431_001|AQU2.1.2…
6793	1.853e-05	0.0017381	334	2901	1871	19944	phosphorus metabolic process	AQU2.1.26103_001|AQU2.1.39866_001|AQU2.1.19409_001|AQU2.1.34426_001|AQU2.1.20901_001|AQU2.1.43392_001|AQU2.1.42005_001|AQU2.1.10958_001|AQU2.1.10982_001|AQU2.1.11372_001|AQU2.1.33010_001|AQU2.1.11496_001|AQU2.1.36825_001|AQU2.1.29462_001|AQU2.1.12958_001|AQU2.1.14648_001|AQU2.1.11178_001|AQU2.1.26898_001|AQU2.1.33045_001|AQU2.1.26901_001|AQU2.1.29330_001|AQU2.1.29829_001|AQU2.1.25431_001|AQU2.1.2…
7154	3.6344e-05	0.0032779	443	4007	1871	19944	cell communication	AQU2.1.30418_001|AQU2.1.14141_001|AQU2.1.16893_001|AQU2.1.14478_001|AQU2.1.16532_001|AQU2.1.11496_001|AQU2.1.36825_001|AQU2.1.21792_001|AQU2.1.13011_001|AQU2.1.11143_001|AQU2.1.16435_001|AQU2.1.23652_001|AQU2.1.13719_001|AQU2.1.18931_001|AQU2.1.22085_001|AQU2.1.14946_001|AQU2.1.27571_001|AQU2.1.17984_001|AQU2.1.14601_001|AQU2.1.41280_001|AQU2.1.30167_001|AQU2.1.14277_001|AQU2.1.14350_001|AQU2.1.1…
6811	7.8086e-05	0.0067819	94	679	1871	19944	ion transport	AQU2.1.13443_001|AQU2.1.13010_001|AQU2.1.13117_001|AQU2.1.12469_001|AQU2.1.16893_001|AQU2.1.14699_001|AQU2.1.40315_001|AQU2.1.39280_001|AQU2.1.22235_001|AQU2.1.11906_001|AQU2.1.16584_001|AQU2.1.18206_001|AQU2.1.16613_001|AQU2.1.20969_001|AQU2.1.44023_001|AQU2.1.30178_001|AQU2.1.31292_001|AQU2.1.26219_001|AQU2.1.24470_001|AQU2.1.40318_001|AQU2.1.18461_001|AQU2.1.43988_001|AQU2.1.12739_001|AQU2.1.3…
[truncated: 205 more columns]
