# Supplementary material for: Landscape of histone modifications in a sponge reveals the origin of animal cis-regulatory complexity
Source: eLife. 2017 Apr 11;6:e22194. doi: 10.7554/eLife.22194 (PMC5429095; doi:10.7554/eLife.22194)
Supplement: Figure 2—source data 2. — DOI: http://dx.doi.org/10.7554/eLife.22194.015 [file elife-22194-fig2-data2.xlsx]

## Sheet: Figure 2-Source Data 2
Figure 2-source data 2. KEGG pathways significantly enriched in low-variance and high-variance genes.
		# genes			Percent
Pathway Reconstruction Result		Total in genome	Low-variance	High-variance	Low-variance	High-variance
Metabolism
Global and overview maps
1100	Metabolic pathways	664	49	117	0.0737952	0.176205
1110	Biosynthesis of secondary metabolites	212	21	35	0.0990566	0.165094
1120	Microbial metabolism in diverse environments	116	17	22	0.146552	0.189655
1130	Biosynthesis of antibiotics	154	18	19	0.116883	0.123377
1200	Carbon metabolism	79	6	11	0.0759494	0.139241
1210	2-Oxocarboxylic acid metabolism	13	1	2	0.0769231	0.153846
1212	Fatty acid metabolism	27	2	5	0.0740741	0.185185
1230	Biosynthesis of amino acids	55	10	6	0.181818	0.109091
Carbohydrate metabolism
10	Glycolysis / Gluconeogenesis	28	3	5	0.107143	0.178571
20	Citrate cycle (TCA cycle)	22	1	1	0.0454545	0.0454545
30	Pentose phosphate pathway	19	1	3	0.0526316	0.157895
40	Pentose and glucuronate interconversions	15	2	2	0.133333	0.133333
51	Fructose and mannose metabolism	18	1	3	0.0555556	0.166667
52	Galactose metabolism	14	2	3	0.142857	0.214286
53	Ascorbate and aldarate metabolism	8	1	2	0.125	0.25
500	Starch and sucrose metabolism	21	1	3	0.047619	0.142857
520	Amino sugar and nucleotide sugar metabolism	33	3	9	0.0909091	0.272727
620	Pyruvate metabolism	20	2	3	0.1	0.15
630	Glyoxylate and dicarboxylate metabolism	27	5	3	0.185185	0.111111
640	Propanoate metabolism	21	0	2	0	0.0952381
650	Butanoate metabolism	17	0	3	0	0.176471
562	Inositol phosphate metabolism	31	2	8	0.0645161	0.258065
Energy metabolism
190	Oxidative phosphorylation	74	0	14	0	0.189189
910	Nitrogen metabolism	5	2	1	0.4	0.2
920	Sulfur metabolism	11	1	3	0.0909091	0.272727
Lipid metabolism
61	Fatty acid biosynthesis	7	1	1	0.142857	0.142857
62	Fatty acid elongation	12	2	3	0.166667	0.25
71	Fatty acid degradation	20	1	5	0.05	0.25
72	Synthesis and degradation of ketone bodies	5	0	2	0	0.4
100	Steroid biosynthesis	13	0	1	0	0.0769231
561	Glycerolipid metabolism	21	2	3	0.0952381	0.142857
564	Glycerophospholipid metabolism	34	3	7	0.0882353	0.205882
565	Ether lipid metabolism	11	1	4	0.0909091	0.363636
600	Sphingolipid metabolism	21	4	5	0.190476	0.238095
590	Arachidonic acid metabolism	12	2	4	0.166667	0.333333
592	alpha-Linolenic acid metabolism	4	1	2	0.25	0.5
1040	Biosynthesis of unsaturated fatty acids	12	1	3	0.0833333	0.25
Nucleotide metabolism
230	Purine metabolism	95	5	15	0.0526316	0.157895
240	Pyrimidine metabolism	71	2	13	0.028169	0.183099
Amino acid metabolism
250	Alanine, aspartate and glutamate metabolism	21	2	3	0.0952381	0.142857
260	Glycine, serine and threonine metabolism	32	3	3	0.09375	0.09375
270	Cysteine and methionine metabolism	35	3	8	0.0857143	0.228571
280	Valine, leucine and isoleucine degradation	34	2	7	0.0588235	0.205882
290	Valine, leucine and isoleucine biosynthesis	5	0	0	0	0
300	Lysine biosynthesis	5	1	1	0.2	0.2
310	Lysine degradation	28	2	6	0.0714286	0.214286
220	Arginine biosynthesis	11	3	1	0.272727	0.0909091
330	Arginine and proline metabolism	28	4	6	0.142857	0.214286
340	Histidine metabolism	8	2	3	0.25	0.375
350	Tyrosine metabolism	14	1	5	0.0714286	0.357143
360	Phenylalanine metabolism	12	4	3	0.333333	0.25
380	Tryptophan metabolism	17	2	3	0.117647	0.176471
400	Phenylalanine, tyrosine and tryptophan biosynthesis	7	2	2	0.285714	0.285714
Metabolism of other amino acids
410	beta-Alanine metabolism	17	2	3	0.117647	0.176471
430	Taurine and hypotaurine metabolism	5	0	0	0	0
450	Selenocompound metabolism	10	1	2	0.1	0.2
460	Cyanoamino acid metabolism	4	0	0	0	0
471	D-Glutamine and D-glutamate metabolism	3	0	0	0	0
480	Glutathione metabolism	21	2	5	0.0952381	0.238095
Glycan biosynthesis and metabolism
510	N-Glycan biosynthesis	29	2	3	0.0689655	0.103448
512	Mucin type O-Glycan biosynthesis	2	0	1	0	0.5
514	Other types of O-glycan biosynthesis	10	0	1	0	0.1
532	Glycosaminoglycan biosynthesis - chondroitin sulfate / dermatan sulfate	9	0	4	0	0.444444
534	Glycosaminoglycan biosynthesis - heparan sulfate / heparin	13	2	2	0.153846	0.153846
531	Glycosaminoglycan degradation	10	2	0	0.2	0
563	Glycosylphosphatidylinositol(GPI)-anchor biosynthesis	19	0	2	0	0.105263
601	Glycosphingolipid biosynthesis - lacto and neolacto series	1	0	0	0	0
603	Glycosphingolipid biosynthesis - globo series	3	1	0	0.333333	0
604	Glycosphingolipid biosynthesis - ganglio series	3	0	0	0	0
511	Other glycan degradation	10	2	6	0.2	0.6
Metabolism of cofactors and vitamins
730	Thiamine metabolism	5	1	1	0.2	0.2
740	Riboflavin metabolism	4	0	0	0	0
750	Vitamin B6 metabolism	7	1	0	0.142857	0
760	Nicotinate and nicotinamide metabolism	13	0	3	0	0.230769
770	Pantothenate and CoA biosynthesis	12	0	1	0	0.0833333
780	Biotin metabolism	5	2	0	0.4	0
785	Lipoic acid metabolism	3	0	0	0	0
790	Folate biosynthesis	9	0	2	0	0.222222
670	One carbon pool by folate	14	3	1	0.214286	0.0714286
830	Retinol metabolism	8	0	1	0	0.125
860	Porphyrin and chlorophyll metabolism	18	1	3	0.0555556	0.166667
130	Ubiquinone and other terpenoid-quinone biosynthesis	8	0	1	0	0.125
Metabolism of terpenoids and polyketides
900	Terpenoid backbone biosynthesis	23	2	3	0.0869565	0.130435
Xenobiotics biodegradation and metabolism
980	Metabolism of xenobiotics by cytochrome P450	8	0	1	0	0.125
982	Drug metabolism - cytochrome P450	7	0	3	0	0.428571
983	Drug metabolism - other enzymes	16	1	4	0.0625	0.25
Genetic Information Processing
Transcription
3020	RNA polymerase	26	1	3	0.0384615	0.115385
3022	Basal transcription factors	29	1	4	0.0344828	0.137931
3040	Spliceosome	100	2	18	0.02	0.18
Translation
3010	Ribosome	111	8	3	0.0720721	0.027027
970	Aminoacyl-tRNA biosynthesis	25	6	8	0.24	0.32
3013	RNA transport	103	4	24	0.038835	0.23301
3015	mRNA surveillance pathway	52	3	8	0.0576923	0.153846
3008	Ribosome biogenesis in eukaryotes	60	4	9	0.0666667	0.15
Folding, sorting and degradation
3060	Protein export	21	2	6	0.0952381	0.285714
4141	Protein processing in endoplasmic reticulum	97	7	12	0.0721649	0.123711
4130	SNARE interactions in vesicular transport	20	1	4	0.05	0.2
4120	Ubiquitin mediated proteolysis	82	1	8	0.0121951	0.097561
4122	Sulfur relay system	9	1	4	0.111111	0.444444
3050	Proteasome	36	0	5	0	0.138889
3018	RNA degradation	53	3	7	0.0566038	0.132075
Replication and repair
3030	DNA replication	37	2	3	0.0540541	0.0810811
3410	Base excision repair	28	0	4	0	0.142857
3420	Nucleotide excision repair	38	2	5	0.0526316	0.131579
3430	Mismatch repair	25	3	3	0.12	0.12
3440	Homologous recombination	31	2	2	0.0645161	0.0645161
3450	Non-homologous end-joining	12	0	1	0	0.0833333
3460	Fanconi anemia pathway	35	1	5	0.0285714	0.142857
Environmental Information Processing
Membrane transport
2010	ABC transporters	26	5	8	0.192308	0.307692
Signal transduction
4014	Ras signaling pathway	58	4	19	0.0689655	0.327586
4015	Rap1 signaling pathway	49	3	17	0.0612245	0.346939
4010	MAPK signaling pathway	66	3	13	0.0454545	0.19697
4012	ErbB signaling pathway	30	1	6	0.0333333	0.2
4310	Wnt signaling pathway	38	1	4	0.0263158	0.105263
4330	Notch signaling pathway	18	1	5	0.0555556	0.277778
4340	Hedgehog signaling pathway	13	2	3	0.153846	0.230769
4350	TGF-beta signaling pathway	23	1	1	0.0434783	0.0434783
4390	Hippo signaling pathway	42	3	5	0.0714286	0.119048
4370	VEGF signaling pathway	17	0	3	0	0.176471
4630	Jak-STAT signaling pathway	16	1	6	0.0625	0.375
4064	NF-kappa B signaling pathway	21	2	8	0.0952381	0.380952
4668	TNF signaling pathway	28	3	8	0.107143	0.285714
4066	HIF-1 signaling pathway	28	2	2	0.0714286	0.0714286
4068	FoxO signaling pathway	46	2	7	0.0434783	0.152174
4020	Calcium signaling pathway	31	2	8	0.0645161	0.258065
4070	Phosphatidylinositol signaling system	32	1	10	0.03125	0.3125
4072	Phospholipase D signaling pathway	41	6	9	0.146341	0.219512
4071	Sphingolipid signaling pathway	40	4	8	0.1	0.2
4024	cAMP signaling pathway	45	4	12	0.0888889	0.266667
4022	cGMP-PKG signaling pathway	37	0	7	0	0.189189
4151	PI3K-Akt signaling pathway	73	3	18	0.0410959	0.246575
4152	AMPK signaling pathway	45	1	5	0.0222222	0.111111
4150	mTOR signaling pathway	25	1	2	0.04	0.08
Signaling molecules and interaction
4080	Neuroactive ligand-receptor interaction	9	4	2	0.444444	0.222222
4512	ECM-receptor interaction	13	1	4	0.0769231	0.307692
Cellular Processes
Transport and catabolism
4144	Endocytosis	115	6	18	0.0521739	0.156522
4145	Phagosome	45	1	11	0.0222222	0.244444
4142	Lysosome	69	6	21	0.0869565	0.304348
4146	Peroxisome	51	3	12	0.0588235	0.235294
4140	Regulation of autophagy	16	1	2	0.0625	0.125
Cell motility
4810	Regulation of actin cytoskeleton	60	3	16	0.05	0.266667
Cell growth and death
4110	Cell cycle	69	3	15	0.0434783	0.217391
4210	Apoptosis	43	6	17	0.139535	0.395349
4115	p53 signaling pathway	26	3	6	0.115385	0.230769
Cellular community
4510	Focal adhesion	57	3	18	0.0526316	0.315789
4520	Adherens junction	29	4	8	0.137931	0.275862
4530	Tight junction	35	1	5	0.0285714	0.142857
4540	Gap junction	22	2	4	0.0909091	0.181818
4550	Signaling pathways regulating pluripotency of stem cells	27	2	7	0.0740741	0.259259
Organismal Systems
Immune system
4620	Toll-like receptor signaling pathway	24	2	8	0.0833333	0.333333
4621	NOD-like receptor signaling pathway	13	2	3	0.153846	0.230769
Nervous system
4724	Glutamatergic synapse	23	4	5	0.173913	0.217391
4727	GABAergic synapse	16	3	3	0.1875	0.1875
4725	Cholinergic synapse	22	2	3	0.0909091	0.136364
4728	Dopaminergic synapse	27	1	6	0.037037	0.222222
4726	Serotonergic synapse	17	1	3	0.0588235	0.176471
4721	Synaptic vesicle cycle	23	0	5	0	0.217391
4722	Neurotrophin signaling pathway	45	1	13	0.0222222	0.288889
Sensory system
4744	Phototransduction	3	0	1	0	0.333333
4740	Olfactory transduction	13	1	1	0.0769231	0.0769231
4750	Inflammatory mediator regulation of TRP channels	23	4	10	0.173913	0.434783
Environmental adaptation
4710	Circadian rhythm	9	0	0	0	0
4713	Circadian entrainment	24	3	3	0.125	0.125
Human Diseases
Cancers: Overview
5200	Pathways in cancer	113	9	31	0.079646	0.274336
