# Supplementary material for: Landscape of histone modifications in a sponge reveals the origin of animal cis-regulatory complexity
Source: eLife. 2017 Apr 11;6:e22194. doi: 10.7554/eLife.22194 (PMC5429095; doi:10.7554/eLife.22194)
Supplement: Figure 4—source data 1. — Table of PcG proteins is adapted from (http://www.igh.cnrs.fr/equip/cavalli/link.PolycombTeaching.html). DOI: http://dx.doi.org/10.7554/eLife.22194.023 [file elife-22194-fig4-data1.xlsx]

## Sheet: Figure 4-Source Data 1
Figure 4-source data 1. Putative orthologs of Drosophila PcG components and associated factors in yeast, Capsaspora, sponge, nematode, and human genome. Table of PcG proteins is adapted from (http://www.igh.cnrs.fr/equip/cavalli/link.PolycombTeaching.html).
	D. melanogaster	H. sapiens	C. elegans	A. queenslandica	C. owczarzaki	S. cerevisiae
PcG/trxG Recruiters
	Dsp1	HMGB2	hmg-1.2	Aqu2.1.41302_001/Aqu2.1.41331_001	CAOG_02944/CAOG_05377	NHP6A/B
	Grh	GRHL1	grh-1	Aqu2.1.17682_001	CAOG_04897	/
	GAGA factor/Trl	(?) See Matharu et al. 2010	/	/	/	/
	Lolal	/	/	/	/	/
	Psq	/	/	/	/	/
	Zeste	/	/	/	/	/
Fly PhoRC complex	Pho	YY1	/	Aqu2.1.35236_001	/	/
	Phol	YY2	/	Aqu2.1.35236_001	/	/
	dSfmbt	L3MBTL2	lin-61	Aqu2.1.30297_001	/	/
	E2f	E2F6	efl-2	Aqu2.1.38416_001/Aqu2.1.36130_001	CAOG_01030	/
	/	BCL6	/	/	/	/
	Rbf	RBL1/RBL2	lin-35	Other retinoblastoma proteins	CAOG_07372	/
	/	PLZF	/	/	/	/
PcG Complexes
PRC2 Complex	E(z)	EZH1/2	mes-2	Aqu2.1.09384_001/Aqu2.1.14405_001/Aqu2.1.14406_001/Aqu2.1.20881_001	/	/
	Esc	EED	mes-6	Aqu2.1.01242_001/Aqu2.1.17726_001	/	/
	Escl	EED	mes-6	Aqu2.1.01242_001/Aqu2.1.17726_001	/	/
	Su(z)12	SUZ12	/	Aqu2.1.28111_001	/	/
	Nurf55 (Caf1)	RBBP4/7	lin-53	Aqu2.1.33333_001	CAOG_03678	HAT2
PRC2-associated factors	Pcl	PHF1/MTF2/MTF2L1	/	/	/	/
	Rpd3	HDAC2	hda-1	Aqu2.1.36284_001	CAOG_05044	RPD3
	Sir2	SIRT1	sir-2.1	Aqu2.1.29888_001	CAOG_05116	SIR2/HST1
PRC1 Complex	Sce/dRing	RNF1/2	spat-3	Aqu2.1.33463_001	CAOG_00371	/
	Pc	CBX2/4/6/7/8	cec-1	/	/	/
	Ph-p	PHC1/2/3	/	Aqu2.1.36261_001	/	/
	Ph-d	PHC1/2/3	/	Aqu2.1.36261_001	/	/
	Psc	PCGF1/2/3/4/5/6	/	Aqu2.1.33463_001	CAOG_07886	/
	Scm	SCMH1	/	/	/	/
PcG/trxG related proteins	Lid	JARID1B/C	rbr-2	Aqu2.1.34136_001	CAOG_02348	JHD2
	dUTX	UTX/JMJD3	utx-1	Aqu2.1.41133_001	/	CYC8
	Asx	ASXL1/2	/	Aqu2.1.31063_001	/	/
	dom	EP400	ssl-1	Aqu2.1.31536_001	CAOG_06596	SWR1
	E(Pc)	EPC1/2	epc-1	Aqu2.1.28509_001	CAOG_01446	EPL1
	Mi-2	Mi-2	chd-3	Aqu2.1.23472_001	CAOG_06633	/
	kis	CHD7	chd-7	Aqu2.1.29668_001	CAOG_03905	/
	tna	ZMIZ1/2	/	Aqu2.1.41643_001/Aqu2.1.01904_001	CAOG_06458	NFI1/SIZ1
	kto	MED12L	dpy-22	Aqu2.1.40999_001	/	/
	skd	THRAP2/TRAP240	let-19	Aqu2.1.31554_001	CAOG_05948	/
