# Supplementary material for: Landscape of histone modifications in a sponge reveals the origin of animal cis-regulatory complexity
Source: eLife. 2017 Apr 11;6:e22194. doi: 10.7554/eLife.22194 (PMC5429095; doi:10.7554/eLife.22194)
Supplement: Figure 5—source data 1. — DOI: http://dx.doi.org/10.7554/eLife.22194.026 [file elife-22194-fig5-data1.xlsx]

## Sheet: Figure 5-Source Data 1
Figure 5-source data 1. Annotation of putative elincRNAs and plincRNAs.
Contig11650	Putative_elincRNA	exon	4508	4948	.	-	.	gene_id "TCONS_00000183"; transcript_id "TCONS_00000183"; exon_number "1"; exon_id "TCONS_00000183.1";
Contig11650	Putative_elincRNA	CDS	4511	4948	.	-	0	gene_id "TCONS_00000183"; transcript_id "TCONS_00000183"; exon_number "1"; exon_id "TCONS_00000183.1";
Contig11650	Putative_elincRNA	exon	8082	8153	.	-	.	gene_id "TCONS_00000183"; transcript_id "TCONS_00000183"; exon_number "2"; exon_id "TCONS_00000183.2";
Contig11650	Putative_elincRNA	CDS	8082	8153	.	-	0	gene_id "TCONS_00000183"; transcript_id "TCONS_00000183"; exon_number "2"; exon_id "TCONS_00000183.2";
Contig11650	Putative_elincRNA	start_codon	8151	8153	.	-	0	gene_id "TCONS_00000183"; transcript_id "TCONS_00000183"; exon_number "1"; exon_id "TCONS_00000183.1";
Contig11650	Putative_elincRNA	stop_codon	4508	4510	.	-	0	gene_id "TCONS_00000183"; transcript_id "TCONS_00000183"; exon_number "1"; exon_id "TCONS_00000183.1";
Contig11732	Putative_elincRNA	exon	4495	5008	.	-	.	gene_id "TCONS_00000197"; transcript_id "TCONS_00000197"; exon_number "1"; exon_id "TCONS_00000197.1";
Contig11732	Putative_elincRNA	CDS	4495	5008	.	-	0	gene_id "TCONS_00000197"; transcript_id "TCONS_00000197"; exon_number "1"; exon_id "TCONS_00000197.1";
Contig11732	Putative_elincRNA	start_codon	5006	5008	.	-	0	gene_id "TCONS_00000197"; transcript_id "TCONS_00000197"; exon_number "1"; exon_id "TCONS_00000197.1";
Contig11827	Putative_elincRNA	exon	12250	12288	.	+	.	gene_id "TCONS_00000218"; transcript_id "TCONS_00000218"; exon_number "1"; exon_id "TCONS_00000218.1";
Contig11827	Putative_elincRNA	CDS	12250	12288	.	+	0	gene_id "TCONS_00000218"; transcript_id "TCONS_00000218"; exon_number "1"; exon_id "TCONS_00000218.1";
Contig11827	Putative_elincRNA	exon	12294	12343	.	+	.	gene_id "TCONS_00000218"; transcript_id "TCONS_00000218"; exon_number "2"; exon_id "TCONS_00000218.2";
Contig11827	Putative_elincRNA	CDS	12294	12343	.	+	0	gene_id "TCONS_00000218"; transcript_id "TCONS_00000218"; exon_number "2"; exon_id "TCONS_00000218.2";
Contig11827	Putative_elincRNA	start_codon	12250	12252	.	+	0	gene_id "TCONS_00000218"; transcript_id "TCONS_00000218"; exon_number "1"; exon_id "TCONS_00000218.1";
Contig12022	Putative_elincRNA	exon	11140	11351	.	+	.	gene_id "TCONS_00000261"; transcript_id "TCONS_00000261"; exon_number "1"; exon_id "TCONS_00000261.1";
Contig12022	Putative_elincRNA	CDS	11140	11351	.	+	0	gene_id "TCONS_00000261"; transcript_id "TCONS_00000261"; exon_number "1"; exon_id "TCONS_00000261.1";
Contig12022	Putative_elincRNA	exon	11361	11426	.	+	.	gene_id "TCONS_00000261"; transcript_id "TCONS_00000261"; exon_number "2"; exon_id "TCONS_00000261.2";
Contig12022	Putative_elincRNA	CDS	11361	11426	.	+	1	gene_id "TCONS_00000261"; transcript_id "TCONS_00000261"; exon_number "2"; exon_id "TCONS_00000261.2";
Contig12022	Putative_elincRNA	start_codon	11140	11142	.	+	0	gene_id "TCONS_00000261"; transcript_id "TCONS_00000261"; exon_number "1"; exon_id "TCONS_00000261.1";
Contig12067	Putative_elincRNA	exon	2300	2386	.	+	.	gene_id "TCONS_00000275"; transcript_id "TCONS_00000275"; exon_number "1"; exon_id "TCONS_00000275.1";
Contig12067	Putative_elincRNA	CDS	2300	2386	.	+	0	gene_id "TCONS_00000275"; transcript_id "TCONS_00000275"; exon_number "1"; exon_id "TCONS_00000275.1";
Contig12067	Putative_elincRNA	exon	2431	2476	.	+	.	gene_id "TCONS_00000275"; transcript_id "TCONS_00000275"; exon_number "2"; exon_id "TCONS_00000275.2";
Contig12067	Putative_elincRNA	CDS	2431	2476	.	+	0	gene_id "TCONS_00000275"; transcript_id "TCONS_00000275"; exon_number "2"; exon_id "TCONS_00000275.2";
Contig12067	Putative_elincRNA	start_codon	2300	2302	.	+	0	gene_id "TCONS_00000275"; transcript_id "TCONS_00000275"; exon_number "1"; exon_id "TCONS_00000275.1";
Contig12067	Putative_elincRNA	exon	7681	7989	.	+	.	gene_id "TCONS_00000276"; transcript_id "TCONS_00000276"; exon_number "1"; exon_id "TCONS_00000276.1";
Contig12067	Putative_elincRNA	CDS	7681	7986	.	+	0	gene_id "TCONS_00000276"; transcript_id "TCONS_00000276"; exon_number "1"; exon_id "TCONS_00000276.1";
Contig12067	Putative_elincRNA	start_codon	7681	7683	.	+	0	gene_id "TCONS_00000276"; transcript_id "TCONS_00000276"; exon_number "1"; exon_id "TCONS_00000276.1";
Contig12067	Putative_elincRNA	stop_codon	7987	7989	.	+	0	gene_id "TCONS_00000276"; transcript_id "TCONS_00000276"; exon_number "1"; exon_id "TCONS_00000276.1";
Contig12067	Putative_elincRNA	exon	10646	11009	.	-	.	gene_id "TCONS_00000277"; transcript_id "TCONS_00000277"; exon_number "1"; exon_id "TCONS_00000277.1";
Contig12067	Putative_elincRNA	CDS	10646	11009	.	-	0	gene_id "TCONS_00000277"; transcript_id "TCONS_00000277"; exon_number "1"; exon_id "TCONS_00000277.1";
Contig12067	Putative_elincRNA	start_codon	11007	11009	.	-	0	gene_id "TCONS_00000277"; transcript_id "TCONS_00000277"; exon_number "1"; exon_id "TCONS_00000277.1";
Contig12067	Putative_elincRNA	exon	11109	11482	.	-	.	gene_id "TCONS_00000278"; transcript_id "TCONS_00000278"; exon_number "1"; exon_id "TCONS_00000278.1";
Contig12067	Putative_elincRNA	CDS	11109	11482	.	-	0	gene_id "TCONS_00000278"; transcript_id "TCONS_00000278"; exon_number "1"; exon_id "TCONS_00000278.1";
Contig12067	Putative_elincRNA	start_codon	11480	11482	.	-	0	gene_id "TCONS_00000278"; transcript_id "TCONS_00000278"; exon_number "1"; exon_id "TCONS_00000278.1";
Contig12085	Putative_elincRNA	exon	6845	6967	.	+	.	gene_id "TCONS_00000283"; transcript_id "TCONS_00000283"; exon_number "1"; exon_id "TCONS_00000283.1";
Contig12085	Putative_elincRNA	CDS	6845	6967	.	+	0	gene_id "TCONS_00000283"; transcript_id "TCONS_00000283"; exon_number "1"; exon_id "TCONS_00000283.1";
Contig12085	Putative_elincRNA	exon	6978	7163	.	+	.	gene_id "TCONS_00000283"; transcript_id "TCONS_00000283"; exon_number "2"; exon_id "TCONS_00000283.2";
Contig12085	Putative_elincRNA	CDS	6978	7160	.	+	0	gene_id "TCONS_00000283"; transcript_id "TCONS_00000283"; exon_number "2"; exon_id "TCONS_00000283.2";
Contig12085	Putative_elincRNA	start_codon	6845	6847	.	+	0	gene_id "TCONS_00000283"; transcript_id "TCONS_00000283"; exon_number "1"; exon_id "TCONS_00000283.1";
Contig12085	Putative_elincRNA	stop_codon	7161	7163	.	+	0	gene_id "TCONS_00000283"; transcript_id "TCONS_00000283"; exon_number "1"; exon_id "TCONS_00000283.1";
Contig12095	Putative_elincRNA	exon	14927	15142	.	-	.	gene_id "TCONS_00000289"; transcript_id "TCONS_00000289"; exon_number "1"; exon_id "TCONS_00000289.1";
Contig12095	Putative_elincRNA	CDS	14930	15142	.	-	0	gene_id "TCONS_00000289"; transcript_id "TCONS_00000289"; exon_number "1"; exon_id "TCONS_00000289.1";
Contig12095	Putative_elincRNA	start_codon	15140	15142	.	-	0	gene_id "TCONS_00000289"; transcript_id "TCONS_00000289"; exon_number "1"; exon_id "TCONS_00000289.1";
Contig12095	Putative_elincRNA	stop_codon	14927	14929	.	-	0	gene_id "TCONS_00000289"; transcript_id "TCONS_00000289"; exon_number "1"; exon_id "TCONS_00000289.1";
Contig12195	Putative_elincRNA	exon	378	400	.	+	.	gene_id "TCONS_00000320"; transcript_id "TCONS_00000320"; exon_number "1"; exon_id "TCONS_00000320.1";
Contig12195	Putative_elincRNA	CDS	378	400	.	+	0	gene_id "TCONS_00000320"; transcript_id "TCONS_00000320"; exon_number "1"; exon_id "TCONS_00000320.1";
Contig12195	Putative_elincRNA	exon	490	775	.	+	.	gene_id "TCONS_00000320"; transcript_id "TCONS_00000320"; exon_number "2"; exon_id "TCONS_00000320.2";
Contig12195	Putative_elincRNA	CDS	490	772	.	+	1	gene_id "TCONS_00000320"; transcript_id "TCONS_00000320"; exon_number "2"; exon_id "TCONS_00000320.2";
Contig12195	Putative_elincRNA	start_codon	378	380	.	+	0	gene_id "TCONS_00000320"; transcript_id "TCONS_00000320"; exon_number "1"; exon_id "TCONS_00000320.1";
Contig12195	Putative_elincRNA	stop_codon	773	775	.	+	0	gene_id "TCONS_00000320"; transcript_id "TCONS_00000320"; exon_number "1"; exon_id "TCONS_00000320.1";
Contig12292	Putative_elincRNA	exon	15826	15899	.	-	.	gene_id "TCONS_00000356"; transcript_id "TCONS_00000356"; exon_number "1"; exon_id "TCONS_00000356.1";
Contig12292	Putative_elincRNA	CDS	15826	15899	.	-	1	gene_id "TCONS_00000356"; transcript_id "TCONS_00000356"; exon_number "1"; exon_id "TCONS_00000356.1";
Contig12292	Putative_elincRNA	exon	15996	16115	.	-	.	gene_id "TCONS_00000356"; transcript_id "TCONS_00000356"; exon_number "2"; exon_id "TCONS_00000356.2";
Contig12292	Putative_elincRNA	CDS	15996	16115	.	-	1	gene_id "TCONS_00000356"; transcript_id "TCONS_00000356"; exon_number "2"; exon_id "TCONS_00000356.2";
Contig12292	Putative_elincRNA	exon	16204	16369	.	-	.	gene_id "TCONS_00000356"; transcript_id "TCONS_00000356"; exon_number "3"; exon_id "TCONS_00000356.3";
Contig12292	Putative_elincRNA	CDS	16204	16369	.	-	2	gene_id "TCONS_00000356"; transcript_id "TCONS_00000356"; exon_number "3"; exon_id "TCONS_00000356.3";
Contig12292	Putative_elincRNA	exon	16968	17164	.	-	.	gene_id "TCONS_00000356"; transcript_id "TCONS_00000356"; exon_number "4"; exon_id "TCONS_00000356.4";
Contig12292	Putative_elincRNA	CDS	16968	17164	.	-	1	gene_id "TCONS_00000356"; transcript_id "TCONS_00000356"; exon_number "4"; exon_id "TCONS_00000356.4";
Contig12292	Putative_elincRNA	exon	17173	17315	.	-	.	gene_id "TCONS_00000356"; transcript_id "TCONS_00000356"; exon_number "5"; exon_id "TCONS_00000356.5";
Contig12292	Putative_elincRNA	CDS	17173	17315	.	-	0	gene_id "TCONS_00000356"; transcript_id "TCONS_00000356"; exon_number "5"; exon_id "TCONS_00000356.5";
Contig12292	Putative_elincRNA	start_codon	17313	17315	.	-	0	gene_id "TCONS_00000356"; transcript_id "TCONS_00000356"; exon_number "1"; exon_id "TCONS_00000356.1";
Contig12329	Putative_elincRNA	exon	11050	11381	.	+	.	gene_id "TCONS_00000365"; transcript_id "TCONS_00000365"; exon_number "1"; exon_id "TCONS_00000365.1";
Contig12329	Putative_elincRNA	CDS	11050	11381	.	+	0	gene_id "TCONS_00000365"; transcript_id "TCONS_00000365"; exon_number "1"; exon_id "TCONS_00000365.1";
Contig12329	Putative_elincRNA	start_codon	11050	11052	.	+	0	gene_id "TCONS_00000365"; transcript_id "TCONS_00000365"; exon_number "1"; exon_id "TCONS_00000365.1";
Contig12528	Putative_elincRNA	exon	13158	13490	.	-	.	gene_id "TCONS_00000434"; transcript_id "TCONS_00000434"; exon_number "1"; exon_id "TCONS_00000434.1";
Contig12528	Putative_elincRNA	CDS	13161	13490	.	-	0	gene_id "TCONS_00000434"; transcript_id "TCONS_00000434"; exon_number "1"; exon_id "TCONS_00000434.1";
Contig12528	Putative_elincRNA	exon	13497	13544	.	-	.	gene_id "TCONS_00000434"; transcript_id "TCONS_00000434"; exon_number "2"; exon_id "TCONS_00000434.2";
Contig12528	Putative_elincRNA	CDS	13497	13544	.	-	0	gene_id "TCONS_00000434"; transcript_id "TCONS_00000434"; exon_number "2"; exon_id "TCONS_00000434.2";
Contig12528	Putative_elincRNA	exon	13611	13646	.	-	.	gene_id "TCONS_00000434"; transcript_id "TCONS_00000434"; exon_number "3"; exon_id "TCONS_00000434.3";
Contig12528	Putative_elincRNA	CDS	13611	13646	.	-	0	gene_id "TCONS_00000434"; transcript_id "TCONS_00000434"; exon_number "3"; exon_id "TCONS_00000434.3";
Contig12528	Putative_elincRNA	start_codon	13644	13646	.	-	0	gene_id "TCONS_00000434"; transcript_id "TCONS_00000434"; exon_number "1"; exon_id "TCONS_00000434.1";
Contig12528	Putative_elincRNA	stop_codon	13158	13160	.	-	0	gene_id "TCONS_00000434"; transcript_id "TCONS_00000434"; exon_number "1"; exon_id "TCONS_00000434.1";
Contig12540	Putative_elincRNA	exon	10254	10336	.	+	.	gene_id "TCONS_00000439"; transcript_id "TCONS_00000439"; exon_number "1"; exon_id "TCONS_00000439.1";
Contig12540	Putative_elincRNA	CDS	10254	10336	.	+	0	gene_id "TCONS_00000439"; transcript_id "TCONS_00000439"; exon_number "1"; exon_id "TCONS_00000439.1";
Contig12540	Putative_elincRNA	exon	10342	10461	.	+	.	gene_id "TCONS_00000439"; transcript_id "TCONS_00000439"; exon_number "2"; exon_id "TCONS_00000439.2";
Contig12540	Putative_elincRNA	CDS	10342	10461	.	+	1	gene_id "TCONS_00000439"; transcript_id "TCONS_00000439"; exon_number "2"; exon_id "TCONS_00000439.2";
Contig12540	Putative_elincRNA	start_codon	10254	10256	.	+	0	gene_id "TCONS_00000439"; transcript_id "TCONS_00000439"; exon_number "1"; exon_id "TCONS_00000439.1";
Contig12576	Putative_elincRNA	exon	3154	3510	.	+	.	gene_id "TCONS_00000463"; transcript_id "TCONS_00000463"; exon_number "1"; exon_id "TCONS_00000463.1";
Contig12576	Putative_elincRNA	CDS	3154	3510	.	+	0	gene_id "TCONS_00000463"; transcript_id "TCONS_00000463"; exon_number "1"; exon_id "TCONS_00000463.1";
Contig12576	Putative_elincRNA	exon	3527	3700	.	+	.	gene_id "TCONS_00000463"; transcript_id "TCONS_00000463"; exon_number "2"; exon_id "TCONS_00000463.2";
Contig12576	Putative_elincRNA	CDS	3527	3697	.	+	0	gene_id "TCONS_00000463"; transcript_id "TCONS_00000463"; exon_number "2"; exon_id "TCONS_00000463.2";
Contig12576	Putative_elincRNA	start_codon	3154	3156	.	+	0	gene_id "TCONS_00000463"; transcript_id "TCONS_00000463"; exon_number "1"; exon_id "TCONS_00000463.1";
Contig12576	Putative_elincRNA	stop_codon	3698	3700	.	+	0	gene_id "TCONS_00000463"; transcript_id "TCONS_00000463"; exon_number "1"; exon_id "TCONS_00000463.1";
Contig12602	Putative_elincRNA	exon	1	96	.	-	.	gene_id "TCONS_00000474"; transcript_id "TCONS_00000474"; exon_number "1"; exon_id "TCONS_00000474.1";
Contig12602	Putative_elincRNA	CDS	4	96	.	-	0	gene_id "TCONS_00000474"; transcript_id "TCONS_00000474"; exon_number "1"; exon_id "TCONS_00000474.1";
Contig12602	Putative_elincRNA	start_codon	94	96	.	-	0	gene_id "TCONS_00000474"; transcript_id "TCONS_00000474"; exon_number "1"; exon_id "TCONS_00000474.1";
Contig12602	Putative_elincRNA	stop_codon	1	3	.	-	0	gene_id "TCONS_00000474"; transcript_id "TCONS_00000474"; exon_number "1"; exon_id "TCONS_00000474.1";
Contig12614	Putative_elincRNA	exon	15073	15689	.	-	.	gene_id "TCONS_00000484"; transcript_id "TCONS_00000484"; exon_number "1"; exon_id "TCONS_00000484.1";
Contig12614	Putative_elincRNA	CDS	15073	15689	.	-	0	gene_id "TCONS_00000484"; transcript_id "TCONS_00000484"; exon_number "1"; exon_id "TCONS_00000484.1";
Contig12614	Putative_elincRNA	start_codon	15687	15689	.	-	0	gene_id "TCONS_00000484"; transcript_id "TCONS_00000484"; exon_number "1"; exon_id "TCONS_00000484.1";
Contig12636	Putative_elincRNA	exon	18911	19194	.	+	.	gene_id "TCONS_00000494"; transcript_id "TCONS_00000494"; exon_number "1"; exon_id "TCONS_00000494.1";
Contig12636	Putative_elincRNA	CDS	18911	19194	.	+	0	gene_id "TCONS_00000494"; transcript_id "TCONS_00000494"; exon_number "1"; exon_id "TCONS_00000494.1";
Contig12636	Putative_elincRNA	start_codon	18911	18913	.	+	0	gene_id "TCONS_00000494"; transcript_id "TCONS_00000494"; exon_number "1"; exon_id "TCONS_00000494.1";
Contig12695	Putative_elincRNA	exon	21120	21602	.	+	.	gene_id "TCONS_00000544"; transcript_id "TCONS_00000544"; exon_number "1"; exon_id "TCONS_00000544.1";
Contig12695	Putative_elincRNA	CDS	21120	21599	.	+	0	gene_id "TCONS_00000544"; transcript_id "TCONS_00000544"; exon_number "1"; exon_id "TCONS_00000544.1";
Contig12695	Putative_elincRNA	start_codon	21120	21122	.	+	0	gene_id "TCONS_00000544"; transcript_id "TCONS_00000544"; exon_number "1"; exon_id "TCONS_00000544.1";
Contig12695	Putative_elincRNA	stop_codon	21600	21602	.	+	0	gene_id "TCONS_00000544"; transcript_id "TCONS_00000544"; exon_number "1"; exon_id "TCONS_00000544.1";
Contig12705	Putative_elincRNA	exon	12451	12801	.	-	.	gene_id "TCONS_00000547"; transcript_id "TCONS_00000547"; exon_number "1"; exon_id "TCONS_00000547.1";
Contig12705	Putative_elincRNA	CDS	12454	12801	.	-	0	gene_id "TCONS_00000547"; transcript_id "TCONS_00000547"; exon_number "1"; exon_id "TCONS_00000547.1";
Contig12705	Putative_elincRNA	start_codon	12799	12801	.	-	0	gene_id "TCONS_00000547"; transcript_id "TCONS_00000547"; exon_number "1"; exon_id "TCONS_00000547.1";
Contig12705	Putative_elincRNA	stop_codon	12451	12453	.	-	0	gene_id "TCONS_00000547"; transcript_id "TCONS_00000547"; exon_number "1"; exon_id "TCONS_00000547.1";
Contig12789	Putative_elincRNA	exon	720	1614	.	-	.	gene_id "TCONS_00000612"; transcript_id "TCONS_00000612"; exon_number "1"; exon_id "TCONS_00000612.1";
Contig12789	Putative_elincRNA	CDS	720	1614	.	-	0	gene_id "TCONS_00000612"; transcript_id "TCONS_00000612"; exon_number "1"; exon_id "TCONS_00000612.1";
Contig12789	Putative_elincRNA	start_codon	1612	1614	.	-	0	gene_id "TCONS_00000612"; transcript_id "TCONS_00000612"; exon_number "1"; exon_id "TCONS_00000612.1";
Contig12846	Putative_elincRNA	exon	45900	46229	.	+	.	gene_id "TCONS_00000645"; transcript_id "TCONS_00000645"; exon_number "1"; exon_id "TCONS_00000645.1";
Contig12846	Putative_elincRNA	CDS	45900	46226	.	+	0	gene_id "TCONS_00000645"; transcript_id "TCONS_00000645"; exon_number "1"; exon_id "TCONS_00000645.1";
Contig12846	Putative_elincRNA	start_codon	45900	45902	.	+	0	gene_id "TCONS_00000645"; transcript_id "TCONS_00000645"; exon_number "1"; exon_id "TCONS_00000645.1";
Contig12846	Putative_elincRNA	stop_codon	46227	46229	.	+	0	gene_id "TCONS_00000645"; transcript_id "TCONS_00000645"; exon_number "1"; exon_id "TCONS_00000645.1";
Contig12851	Putative_elincRNA	exon	33327	33440	.	-	.	gene_id "TCONS_00000648"; transcript_id "TCONS_00000648"; exon_number "1"; exon_id "TCONS_00000648.1";
Contig12851	Putative_elincRNA	CDS	33330	33440	.	-	0	gene_id "TCONS_00000648"; transcript_id "TCONS_00000648"; exon_number "1"; exon_id "TCONS_00000648.1";
Contig12851	Putative_elincRNA	exon	33486	33548	.	-	.	gene_id "TCONS_00000648"; transcript_id "TCONS_00000648"; exon_number "2"; exon_id "TCONS_00000648.2";
Contig12851	Putative_elincRNA	CDS	33486	33548	.	-	0	gene_id "TCONS_00000648"; transcript_id "TCONS_00000648"; exon_number "2"; exon_id "TCONS_00000648.2";
Contig12851	Putative_elincRNA	exon	33609	33620	.	-	.	gene_id "TCONS_00000648"; transcript_id "TCONS_00000648"; exon_number "3"; exon_id "TCONS_00000648.3";
Contig12851	Putative_elincRNA	CDS	33609	33620	.	-	0	gene_id "TCONS_00000648"; transcript_id "TCONS_00000648"; exon_number "3"; exon_id "TCONS_00000648.3";
Contig12851	Putative_elincRNA	exon	33626	33787	.	-	.	gene_id "TCONS_00000648"; transcript_id "TCONS_00000648"; exon_number "4"; exon_id "TCONS_00000648.4";
Contig12851	Putative_elincRNA	CDS	33626	33787	.	-	0	gene_id "TCONS_00000648"; transcript_id "TCONS_00000648"; exon_number "4"; exon_id "TCONS_00000648.4";
Contig12851	Putative_elincRNA	start_codon	33785	33787	.	-	0	gene_id "TCONS_00000648"; transcript_id "TCONS_00000648"; exon_number "1"; exon_id "TCONS_00000648.1";
Contig12851	Putative_elincRNA	stop_codon	33327	33329	.	-	0	gene_id "TCONS_00000648"; transcript_id "TCONS_00000648"; exon_number "1"; exon_id "TCONS_00000648.1";
Contig12901	Putative_elincRNA	exon	20711	20932	.	-	.	gene_id "TCONS_00000709"; transcript_id "TCONS_00000709"; exon_number "1"; exon_id "TCONS_00000709.1";
Contig12901	Putative_elincRNA	CDS	20714	20932	.	-	0	gene_id "TCONS_00000709"; transcript_id "TCONS_00000709"; exon_number "1"; exon_id "TCONS_00000709.1";
Contig12901	Putative_elincRNA	start_codon	20930	20932	.	-	0	gene_id "TCONS_00000709"; transcript_id "TCONS_00000709"; exon_number "1"; exon_id "TCONS_00000709.1";
Contig12901	Putative_elincRNA	stop_codon	20711	20713	.	-	0	gene_id "TCONS_00000709"; transcript_id "TCONS_00000709"; exon_number "1"; exon_id "TCONS_00000709.1";
Contig12938	Putative_elincRNA	exon	61	275	.	-	.	gene_id "TCONS_00000744"; transcript_id "TCONS_00000744"; exon_number "1"; exon_id "TCONS_00000744.1";
Contig12938	Putative_elincRNA	CDS	61	275	.	-	0	gene_id "TCONS_00000744"; transcript_id "TCONS_00000744"; exon_number "1"; exon_id "TCONS_00000744.1";
Contig12938	Putative_elincRNA	start_codon	273	275	.	-	0	gene_id "TCONS_00000744"; transcript_id "TCONS_00000744"; exon_number "1"; exon_id "TCONS_00000744.1";
Contig12976	Putative_elincRNA	exon	53577	53664	.	+	.	gene_id "TCONS_00000782"; transcript_id "TCONS_00000782"; exon_number "1"; exon_id "TCONS_00000782.1";
Contig12976	Putative_elincRNA	CDS	53577	53664	.	+	0	gene_id "TCONS_00000782"; transcript_id "TCONS_00000782"; exon_number "1"; exon_id "TCONS_00000782.1";
Contig12976	Putative_elincRNA	exon	53718	53876	.	+	.	gene_id "TCONS_00000782"; transcript_id "TCONS_00000782"; exon_number "2"; exon_id "TCONS_00000782.2";
Contig12976	Putative_elincRNA	CDS	53718	53876	.	+	2	gene_id "TCONS_00000782"; transcript_id "TCONS_00000782"; exon_number "2"; exon_id "TCONS_00000782.2";
Contig12976	Putative_elincRNA	exon	53940	54191	.	+	.	gene_id "TCONS_00000782"; transcript_id "TCONS_00000782"; exon_number "3"; exon_id "TCONS_00000782.3";
Contig12976	Putative_elincRNA	CDS	53940	54191	.	+	2	gene_id "TCONS_00000782"; transcript_id "TCONS_00000782"; exon_number "3"; exon_id "TCONS_00000782.3";
Contig12976	Putative_elincRNA	start_codon	53577	53579	.	+	0	gene_id "TCONS_00000782"; transcript_id "TCONS_00000782"; exon_number "1"; exon_id "TCONS_00000782.1";
Contig12985	Putative_elincRNA	exon	51973	52278	.	-	.	gene_id "TCONS_00000795"; transcript_id "TCONS_00000795"; exon_number "1"; exon_id "TCONS_00000795.1";
Contig12985	Putative_elincRNA	CDS	51976	52278	.	-	0	gene_id "TCONS_00000795"; transcript_id "TCONS_00000795"; exon_number "1"; exon_id "TCONS_00000795.1";
Contig12985	Putative_elincRNA	start_codon	52276	52278	.	-	0	gene_id "TCONS_00000795"; transcript_id "TCONS_00000795"; exon_number "1"; exon_id "TCONS_00000795.1";
Contig12985	Putative_elincRNA	stop_codon	51973	51975	.	-	0	gene_id "TCONS_00000795"; transcript_id "TCONS_00000795"; exon_number "1"; exon_id "TCONS_00000795.1";
Contig13005	Putative_elincRNA	exon	30046	30232	.	+	.	gene_id "TCONS_00000818"; transcript_id "TCONS_00000818"; exon_number "1"; exon_id "TCONS_00000818.1";
Contig13005	Putative_elincRNA	CDS	30046	30232	.	+	0	gene_id "TCONS_00000818"; transcript_id "TCONS_00000818"; exon_number "1"; exon_id "TCONS_00000818.1";
Contig13005	Putative_elincRNA	exon	30293	30326	.	+	.	gene_id "TCONS_00000818"; transcript_id "TCONS_00000818"; exon_number "2"; exon_id "TCONS_00000818.2";
Contig13005	Putative_elincRNA	CDS	30293	30326	.	+	2	gene_id "TCONS_00000818"; transcript_id "TCONS_00000818"; exon_number "2"; exon_id "TCONS_00000818.2";
Contig13005	Putative_elincRNA	start_codon	30046	30048	.	+	0	gene_id "TCONS_00000818"; transcript_id "TCONS_00000818"; exon_number "1"; exon_id "TCONS_00000818.1";
Contig13020	Putative_elincRNA	exon	1077	1256	.	-	.	gene_id "TCONS_00000850"; transcript_id "TCONS_00000850"; exon_number "1"; exon_id "TCONS_00000850.1";
Contig13020	Putative_elincRNA	CDS	1077	1256	.	-	2	gene_id "TCONS_00000850"; transcript_id "TCONS_00000850"; exon_number "1"; exon_id "TCONS_00000850.1";
Contig13020	Putative_elincRNA	exon	1265	1391	.	-	.	gene_id "TCONS_00000850"; transcript_id "TCONS_00000850"; exon_number "2"; exon_id "TCONS_00000850.2";
Contig13020	Putative_elincRNA	CDS	1265	1391	.	-	0	gene_id "TCONS_00000850"; transcript_id "TCONS_00000850"; exon_number "2"; exon_id "TCONS_00000850.2";
Contig13020	Putative_elincRNA	start_codon	1389	1391	.	-	0	gene_id "TCONS_00000850"; transcript_id "TCONS_00000850"; exon_number "1"; exon_id "TCONS_00000850.1";
Contig13038	Putative_elincRNA	exon	15734	16174	.	-	.	gene_id "TCONS_00000873"; transcript_id "TCONS_00000873"; exon_number "1"; exon_id "TCONS_00000873.1";
Contig13038	Putative_elincRNA	CDS	15737	16174	.	-	0	gene_id "TCONS_00000873"; transcript_id "TCONS_00000873"; exon_number "1"; exon_id "TCONS_00000873.1";
Contig13038	Putative_elincRNA	start_codon	16172	16174	.	-	0	gene_id "TCONS_00000873"; transcript_id "TCONS_00000873"; exon_number "1"; exon_id "TCONS_00000873.1";
Contig13038	Putative_elincRNA	stop_codon	15734	15736	.	-	0	gene_id "TCONS_00000873"; transcript_id "TCONS_00000873"; exon_number "1"; exon_id "TCONS_00000873.1";
Contig13056	Putative_elincRNA	exon	4487	4554	.	+	.	gene_id "TCONS_00000903"; transcript_id "TCONS_00000903"; exon_number "1"; exon_id "TCONS_00000903.1";
Contig13056	Putative_elincRNA	CDS	4487	4554	.	+	0	gene_id "TCONS_00000903"; transcript_id "TCONS_00000903"; exon_number "1"; exon_id "TCONS_00000903.1";
Contig13056	Putative_elincRNA	exon	4620	5062	.	+	.	gene_id "TCONS_00000903"; transcript_id "TCONS_00000903"; exon_number "2"; exon_id "TCONS_00000903.2";
Contig13056	Putative_elincRNA	CDS	4620	5062	.	+	1	gene_id "TCONS_00000903"; transcript_id "TCONS_00000903"; exon_number "2"; exon_id "TCONS_00000903.2";
Contig13056	Putative_elincRNA	start_codon	4487	4489	.	+	0	gene_id "TCONS_00000903"; transcript_id "TCONS_00000903"; exon_number "1"; exon_id "TCONS_00000903.1";
Contig13070	Putative_elincRNA	exon	22447	22641	.	+	.	gene_id "TCONS_00000927"; transcript_id "TCONS_00000927"; exon_number "1"; exon_id "TCONS_00000927.1";
Contig13070	Putative_elincRNA	CDS	22447	22638	.	+	0	gene_id "TCONS_00000927"; transcript_id "TCONS_00000927"; exon_number "1"; exon_id "TCONS_00000927.1";
Contig13070	Putative_elincRNA	start_codon	22447	22449	.	+	0	gene_id "TCONS_00000927"; transcript_id "TCONS_00000927"; exon_number "1"; exon_id "TCONS_00000927.1";
Contig13070	Putative_elincRNA	stop_codon	22639	22641	.	+	0	gene_id "TCONS_00000927"; transcript_id "TCONS_00000927"; exon_number "1"; exon_id "TCONS_00000927.1";
Contig13074	Putative_elincRNA	exon	21227	21603	.	+	.	gene_id "TCONS_00000937"; transcript_id "TCONS_00000937"; exon_number "1"; exon_id "TCONS_00000937.1";
Contig13074	Putative_elincRNA	CDS	21227	21603	.	+	0	gene_id "TCONS_00000937"; transcript_id "TCONS_00000937"; exon_number "1"; exon_id "TCONS_00000937.1";
Contig13074	Putative_elincRNA	exon	21655	21693	.	+	.	gene_id "TCONS_00000937"; transcript_id "TCONS_00000937"; exon_number "2"; exon_id "TCONS_00000937.2";
Contig13074	Putative_elincRNA	CDS	21655	21693	.	+	1	gene_id "TCONS_00000937"; transcript_id "TCONS_00000937"; exon_number "2"; exon_id "TCONS_00000937.2";
Contig13074	Putative_elincRNA	start_codon	21227	21229	.	+	0	gene_id "TCONS_00000937"; transcript_id "TCONS_00000937"; exon_number "1"; exon_id "TCONS_00000937.1";
Contig13074	Putative_elincRNA	exon	27484	27652	.	-	.	gene_id "TCONS_00000941"; transcript_id "TCONS_00000941"; exon_number "1"; exon_id "TCONS_00000941.1";
Contig13074	Putative_elincRNA	CDS	27487	27652	.	-	1	gene_id "TCONS_00000941"; transcript_id "TCONS_00000941"; exon_number "1"; exon_id "TCONS_00000941.1";
Contig13074	Putative_elincRNA	exon	28255	28424	.	-	.	gene_id "TCONS_00000941"; transcript_id "TCONS_00000941"; exon_number "2"; exon_id "TCONS_00000941.2";
Contig13074	Putative_elincRNA	CDS	28255	28424	.	-	0	gene_id "TCONS_00000941"; transcript_id "TCONS_00000941"; exon_number "2"; exon_id "TCONS_00000941.2";
Contig13074	Putative_elincRNA	start_codon	28422	28424	.	-	0	gene_id "TCONS_00000941"; transcript_id "TCONS_00000941"; exon_number "1"; exon_id "TCONS_00000941.1";
Contig13074	Putative_elincRNA	stop_codon	27484	27486	.	-	0	gene_id "TCONS_00000941"; transcript_id "TCONS_00000941"; exon_number "1"; exon_id "TCONS_00000941.1";
Contig13080	Putative_elincRNA	exon	72031	72446	.	+	.	gene_id "TCONS_00000962"; transcript_id "TCONS_00000962"; exon_number "1"; exon_id "TCONS_00000962.1";
Contig13080	Putative_elincRNA	CDS	72031	72446	.	+	0	gene_id "TCONS_00000962"; transcript_id "TCONS_00000962"; exon_number "1"; exon_id "TCONS_00000962.1";
Contig13080	Putative_elincRNA	exon	72540	72572	.	+	.	gene_id "TCONS_00000962"; transcript_id "TCONS_00000962"; exon_number "2"; exon_id "TCONS_00000962.2";
Contig13080	Putative_elincRNA	CDS	72540	72572	.	+	1	gene_id "TCONS_00000962"; transcript_id "TCONS_00000962"; exon_number "2"; exon_id "TCONS_00000962.2";
Contig13080	Putative_elincRNA	start_codon	72031	72033	.	+	0	gene_id "TCONS_00000962"; transcript_id "TCONS_00000962"; exon_number "1"; exon_id "TCONS_00000962.1";
Contig13086	Putative_elincRNA	exon	4805	4841	.	-	.	gene_id "TCONS_00000967"; transcript_id "TCONS_00000967"; exon_number "1"; exon_id "TCONS_00000967.1";
Contig13086	Putative_elincRNA	CDS	4805	4841	.	-	0	gene_id "TCONS_00000967"; transcript_id "TCONS_00000967"; exon_number "1"; exon_id "TCONS_00000967.1";
Contig13086	Putative_elincRNA	exon	39621	39683	.	-	.	gene_id "TCONS_00000967"; transcript_id "TCONS_00000967"; exon_number "2"; exon_id "TCONS_00000967.2";
Contig13086	Putative_elincRNA	CDS	39621	39683	.	-	0	gene_id "TCONS_00000967"; transcript_id "TCONS_00000967"; exon_number "2"; exon_id "TCONS_00000967.2";
Contig13086	Putative_elincRNA	exon	39696	39766	.	-	.	gene_id "TCONS_00000967"; transcript_id "TCONS_00000967"; exon_number "3"; exon_id "TCONS_00000967.3";
Contig13086	Putative_elincRNA	CDS	39696	39766	.	-	2	gene_id "TCONS_00000967"; transcript_id "TCONS_00000967"; exon_number "3"; exon_id "TCONS_00000967.3";
Contig13086	Putative_elincRNA	exon	40884	41031	.	-	.	gene_id "TCONS_00000967"; transcript_id "TCONS_00000967"; exon_number "4"; exon_id "TCONS_00000967.4";
Contig13086	Putative_elincRNA	CDS	40884	41031	.	-	0	gene_id "TCONS_00000967"; transcript_id "TCONS_00000967"; exon_number "4"; exon_id "TCONS_00000967.4";
Contig13086	Putative_elincRNA	exon	41129	41323	.	-	.	gene_id "TCONS_00000967"; transcript_id "TCONS_00000967"; exon_number "5"; exon_id "TCONS_00000967.5";
Contig13086	Putative_elincRNA	CDS	41129	41323	.	-	0	gene_id "TCONS_00000967"; transcript_id "TCONS_00000967"; exon_number "5"; exon_id "TCONS_00000967.5";
Contig13086	Putative_elincRNA	start_codon	41321	41323	.	-	0	gene_id "TCONS_00000967"; transcript_id "TCONS_00000967"; exon_number "1"; exon_id "TCONS_00000967.1";
Contig13104	Putative_elincRNA	exon	29810	30142	.	+	.	gene_id "TCONS_00001019"; transcript_id "TCONS_00001019"; exon_number "1"; exon_id "TCONS_00001019.1";
Contig13104	Putative_elincRNA	CDS	29810	30139	.	+	0	gene_id "TCONS_00001019"; transcript_id "TCONS_00001019"; exon_number "1"; exon_id "TCONS_00001019.1";
Contig13104	Putative_elincRNA	start_codon	29810	29812	.	+	0	gene_id "TCONS_00001019"; transcript_id "TCONS_00001019"; exon_number "1"; exon_id "TCONS_00001019.1";
Contig13104	Putative_elincRNA	stop_codon	30140	30142	.	+	0	gene_id "TCONS_00001019"; transcript_id "TCONS_00001019"; exon_number "1"; exon_id "TCONS_00001019.1";
Contig13154	Putative_elincRNA	exon	11423	11729	.	+	.	gene_id "TCONS_00001137"; transcript_id "TCONS_00001137"; exon_number "1"; exon_id "TCONS_00001137.1";
Contig13154	Putative_elincRNA	CDS	11423	11729	.	+	0	gene_id "TCONS_00001137"; transcript_id "TCONS_00001137"; exon_number "1"; exon_id "TCONS_00001137.1";
Contig13154	Putative_elincRNA	exon	11797	11828	.	+	.	gene_id "TCONS_00001137"; transcript_id "TCONS_00001137"; exon_number "2"; exon_id "TCONS_00001137.2";
Contig13154	Putative_elincRNA	CDS	11797	11828	.	+	2	gene_id "TCONS_00001137"; transcript_id "TCONS_00001137"; exon_number "2"; exon_id "TCONS_00001137.2";
Contig13154	Putative_elincRNA	exon	11846	12030	.	+	.	gene_id "TCONS_00001137"; transcript_id "TCONS_00001137"; exon_number "3"; exon_id "TCONS_00001137.3";
Contig13154	Putative_elincRNA	CDS	11846	12030	.	+	0	gene_id "TCONS_00001137"; transcript_id "TCONS_00001137"; exon_number "3"; exon_id "TCONS_00001137.3";
Contig13154	Putative_elincRNA	start_codon	11423	11425	.	+	0	gene_id "TCONS_00001137"; transcript_id "TCONS_00001137"; exon_number "1"; exon_id "TCONS_00001137.1";
Contig13155	Putative_elincRNA	exon	10405	10567	.	+	.	gene_id "TCONS_00001141"; transcript_id "TCONS_00001141"; exon_number "1"; exon_id "TCONS_00001141.1";
Contig13155	Putative_elincRNA	CDS	10405	10567	.	+	0	gene_id "TCONS_00001141"; transcript_id "TCONS_00001141"; exon_number "1"; exon_id "TCONS_00001141.1";
Contig13155	Putative_elincRNA	start_codon	10405	10407	.	+	0	gene_id "TCONS_00001141"; transcript_id "TCONS_00001141"; exon_number "1"; exon_id "TCONS_00001141.1";
Contig13166	Putative_elincRNA	exon	96876	97013	.	-	.	gene_id "TCONS_00001173"; transcript_id "TCONS_00001173"; exon_number "1"; exon_id "TCONS_00001173.1";
Contig13166	Putative_elincRNA	CDS	96876	97013	.	-	1	gene_id "TCONS_00001173"; transcript_id "TCONS_00001173"; exon_number "1"; exon_id "TCONS_00001173.1";
Contig13166	Putative_elincRNA	exon	97023	97174	.	-	.	gene_id "TCONS_00001173"; transcript_id "TCONS_00001173"; exon_number "2"; exon_id "TCONS_00001173.2";
Contig13166	Putative_elincRNA	CDS	97023	97174	.	-	0	gene_id "TCONS_00001173"; transcript_id "TCONS_00001173"; exon_number "2"; exon_id "TCONS_00001173.2";
Contig13166	Putative_elincRNA	start_codon	97172	97174	.	-	0	gene_id "TCONS_00001173"; transcript_id "TCONS_00001173"; exon_number "1"; exon_id "TCONS_00001173.1";
Contig13168	Putative_elincRNA	exon	78099	78416	.	-	.	gene_id "TCONS_00001180"; transcript_id "TCONS_00001180"; exon_number "1"; exon_id "TCONS_00001180.1";
Contig13168	Putative_elincRNA	CDS	78102	78416	.	-	0	gene_id "TCONS_00001180"; transcript_id "TCONS_00001180"; exon_number "1"; exon_id "TCONS_00001180.1";
Contig13168	Putative_elincRNA	start_codon	78414	78416	.	-	0	gene_id "TCONS_00001180"; transcript_id "TCONS_00001180"; exon_number "1"; exon_id "TCONS_00001180.1";
Contig13168	Putative_elincRNA	stop_codon	78099	78101	.	-	0	gene_id "TCONS_00001180"; transcript_id "TCONS_00001180"; exon_number "1"; exon_id "TCONS_00001180.1";
Contig13173	Putative_elincRNA	exon	36010	36093	.	+	.	gene_id "TCONS_00001192"; transcript_id "TCONS_00001192"; exon_number "1"; exon_id "TCONS_00001192.1";
Contig13173	Putative_elincRNA	CDS	36010	36093	.	+	0	gene_id "TCONS_00001192"; transcript_id "TCONS_00001192"; exon_number "1"; exon_id "TCONS_00001192.1";
Contig13173	Putative_elincRNA	exon	36778	36835	.	+	.	gene_id "TCONS_00001192"; transcript_id "TCONS_00001192"; exon_number "2"; exon_id "TCONS_00001192.2";
Contig13173	Putative_elincRNA	CDS	36778	36835	.	+	0	gene_id "TCONS_00001192"; transcript_id "TCONS_00001192"; exon_number "2"; exon_id "TCONS_00001192.2";
Contig13173	Putative_elincRNA	exon	36887	37036	.	+	.	gene_id "TCONS_00001192"; transcript_id "TCONS_00001192"; exon_number "3"; exon_id "TCONS_00001192.3";
Contig13173	Putative_elincRNA	CDS	36887	37036	.	+	2	gene_id "TCONS_00001192"; transcript_id "TCONS_00001192"; exon_number "3"; exon_id "TCONS_00001192.3";
Contig13173	Putative_elincRNA	exon	37087	37166	.	+	.	gene_id "TCONS_00001192"; transcript_id "TCONS_00001192"; exon_number "4"; exon_id "TCONS_00001192.4";
Contig13173	Putative_elincRNA	CDS	37087	37166	.	+	2	gene_id "TCONS_00001192"; transcript_id "TCONS_00001192"; exon_number "4"; exon_id "TCONS_00001192.4";
Contig13173	Putative_elincRNA	exon	37954	38068	.	+	.	gene_id "TCONS_00001192"; transcript_id "TCONS_00001192"; exon_number "5"; exon_id "TCONS_00001192.5";
Contig13173	Putative_elincRNA	CDS	37954	38068	.	+	0	gene_id "TCONS_00001192"; transcript_id "TCONS_00001192"; exon_number "5"; exon_id "TCONS_00001192.5";
Contig13173	Putative_elincRNA	exon	38115	38409	.	+	.	gene_id "TCONS_00001192"; transcript_id "TCONS_00001192"; exon_number "6"; exon_id "TCONS_00001192.6";
Contig13173	Putative_elincRNA	CDS	38115	38409	.	+	2	gene_id "TCONS_00001192"; transcript_id "TCONS_00001192"; exon_number "6"; exon_id "TCONS_00001192.6";
Contig13173	Putative_elincRNA	start_codon	36010	36012	.	+	0	gene_id "TCONS_00001192"; transcript_id "TCONS_00001192"; exon_number "1"; exon_id "TCONS_00001192.1";
Contig13173	Putative_elincRNA	exon	36797	36835	.	+	.	gene_id "TCONS_00001193"; transcript_id "TCONS_00001193"; exon_number "1"; exon_id "TCONS_00001193.1";
Contig13173	Putative_elincRNA	CDS	36797	36835	.	+	0	gene_id "TCONS_00001193"; transcript_id "TCONS_00001193"; exon_number "1"; exon_id "TCONS_00001193.1";
Contig13173	Putative_elincRNA	exon	37087	37166	.	+	.	gene_id "TCONS_00001193"; transcript_id "TCONS_00001193"; exon_number "2"; exon_id "TCONS_00001193.2";
Contig13173	Putative_elincRNA	CDS	37087	37166	.	+	0	gene_id "TCONS_00001193"; transcript_id "TCONS_00001193"; exon_number "2"; exon_id "TCONS_00001193.2";
Contig13173	Putative_elincRNA	exon	37899	38068	.	+	.	gene_id "TCONS_00001193"; transcript_id "TCONS_00001193"; exon_number "3"; exon_id "TCONS_00001193.3";
Contig13173	Putative_elincRNA	CDS	37899	38068	.	+	1	gene_id "TCONS_00001193"; transcript_id "TCONS_00001193"; exon_number "3"; exon_id "TCONS_00001193.3";
Contig13173	Putative_elincRNA	exon	38115	38409	.	+	.	gene_id "TCONS_00001193"; transcript_id "TCONS_00001193"; exon_number "4"; exon_id "TCONS_00001193.4";
Contig13173	Putative_elincRNA	CDS	38115	38409	.	+	2	gene_id "TCONS_00001193"; transcript_id "TCONS_00001193"; exon_number "4"; exon_id "TCONS_00001193.4";
Contig13173	Putative_elincRNA	start_codon	36797	36799	.	+	0	gene_id "TCONS_00001193"; transcript_id "TCONS_00001193"; exon_number "1"; exon_id "TCONS_00001193.1";
Contig13175	Putative_elincRNA	exon	91020	91106	.	+	.	gene_id "TCONS_00001203"; transcript_id "TCONS_00001203"; exon_number "1"; exon_id "TCONS_00001203.1";
Contig13175	Putative_elincRNA	CDS	91020	91106	.	+	0	gene_id "TCONS_00001203"; transcript_id "TCONS_00001203"; exon_number "1"; exon_id "TCONS_00001203.1";
Contig13175	Putative_elincRNA	exon	91760	91853	.	+	.	gene_id "TCONS_00001203"; transcript_id "TCONS_00001203"; exon_number "2"; exon_id "TCONS_00001203.2";
Contig13175	Putative_elincRNA	CDS	91760	91853	.	+	0	gene_id "TCONS_00001203"; transcript_id "TCONS_00001203"; exon_number "2"; exon_id "TCONS_00001203.2";
Contig13175	Putative_elincRNA	exon	91902	92024	.	+	.	gene_id "TCONS_00001203"; transcript_id "TCONS_00001203"; exon_number "3"; exon_id "TCONS_00001203.3";
Contig13175	Putative_elincRNA	CDS	91902	92024	.	+	2	gene_id "TCONS_00001203"; transcript_id "TCONS_00001203"; exon_number "3"; exon_id "TCONS_00001203.3";
Contig13175	Putative_elincRNA	exon	92269	92360	.	+	.	gene_id "TCONS_00001203"; transcript_id "TCONS_00001203"; exon_number "4"; exon_id "TCONS_00001203.4";
Contig13175	Putative_elincRNA	CDS	92269	92357	.	+	2	gene_id "TCONS_00001203"; transcript_id "TCONS_00001203"; exon_number "4"; exon_id "TCONS_00001203.4";
Contig13175	Putative_elincRNA	start_codon	91020	91022	.	+	0	gene_id "TCONS_00001203"; transcript_id "TCONS_00001203"; exon_number "1"; exon_id "TCONS_00001203.1";
Contig13175	Putative_elincRNA	stop_codon	92358	92360	.	+	0	gene_id "TCONS_00001203"; transcript_id "TCONS_00001203"; exon_number "1"; exon_id "TCONS_00001203.1";
Contig13208	Putative_elincRNA	exon	49293	49626	.	+	.	gene_id "TCONS_00001316"; transcript_id "TCONS_00001316"; exon_number "1"; exon_id "TCONS_00001316.1";
Contig13208	Putative_elincRNA	CDS	49293	49626	.	+	0	gene_id "TCONS_00001316"; transcript_id "TCONS_00001316"; exon_number "1"; exon_id "TCONS_00001316.1";
Contig13208	Putative_elincRNA	start_codon	49293	49295	.	+	0	gene_id "TCONS_00001316"; transcript_id "TCONS_00001316"; exon_number "1"; exon_id "TCONS_00001316.1";
Contig13211	Putative_elincRNA	exon	5028	5257	.	+	.	gene_id "TCONS_00001329"; transcript_id "TCONS_00001329"; exon_number "1"; exon_id "TCONS_00001329.1";
Contig13211	Putative_elincRNA	CDS	5028	5257	.	+	0	gene_id "TCONS_00001329"; transcript_id "TCONS_00001329"; exon_number "1"; exon_id "TCONS_00001329.1";
Contig13211	Putative_elincRNA	exon	5302	5348	.	+	.	gene_id "TCONS_00001329"; transcript_id "TCONS_00001329"; exon_number "2"; exon_id "TCONS_00001329.2";
Contig13211	Putative_elincRNA	CDS	5302	5348	.	+	1	gene_id "TCONS_00001329"; transcript_id "TCONS_00001329"; exon_number "2"; exon_id "TCONS_00001329.2";
Contig13211	Putative_elincRNA	start_codon	5028	5030	.	+	0	gene_id "TCONS_00001329"; transcript_id "TCONS_00001329"; exon_number "1"; exon_id "TCONS_00001329.1";
Contig13211	Putative_elincRNA	exon	111554	111839	.	-	.	gene_id "TCONS_00001336"; transcript_id "TCONS_00001336"; exon_number "1"; exon_id "TCONS_00001336.1";
Contig13211	Putative_elincRNA	CDS	111554	111839	.	-	0	gene_id "TCONS_00001336"; transcript_id "TCONS_00001336"; exon_number "1"; exon_id "TCONS_00001336.1";
Contig13211	Putative_elincRNA	exon	114180	114601	.	-	.	gene_id "TCONS_00001336"; transcript_id "TCONS_00001336"; exon_number "2"; exon_id "TCONS_00001336.2";
Contig13211	Putative_elincRNA	CDS	114180	114601	.	-	2	gene_id "TCONS_00001336"; transcript_id "TCONS_00001336"; exon_number "2"; exon_id "TCONS_00001336.2";
Contig13211	Putative_elincRNA	exon	114608	114749	.	-	.	gene_id "TCONS_00001336"; transcript_id "TCONS_00001336"; exon_number "3"; exon_id "TCONS_00001336.3";
Contig13211	Putative_elincRNA	CDS	114608	114749	.	-	0	gene_id "TCONS_00001336"; transcript_id "TCONS_00001336"; exon_number "3"; exon_id "TCONS_00001336.3";
Contig13211	Putative_elincRNA	start_codon	114747	114749	.	-	0	gene_id "TCONS_00001336"; transcript_id "TCONS_00001336"; exon_number "1"; exon_id "TCONS_00001336.1";
Contig13211	Putative_elincRNA	exon	113297	113893	.	-	.	gene_id "TCONS_00001337"; transcript_id "TCONS_00001337"; exon_number "1"; exon_id "TCONS_00001337.1";
Contig13211	Putative_elincRNA	CDS	113297	113893	.	-	2	gene_id "TCONS_00001337"; transcript_id "TCONS_00001337"; exon_number "1"; exon_id "TCONS_00001337.1";
Contig13211	Putative_elincRNA	exon	113950	114145	.	-	.	gene_id "TCONS_00001337"; transcript_id "TCONS_00001337"; exon_number "2"; exon_id "TCONS_00001337.2";
Contig13211	Putative_elincRNA	CDS	113950	114145	.	-	0	gene_id "TCONS_00001337"; transcript_id "TCONS_00001337"; exon_number "2"; exon_id "TCONS_00001337.2";
Contig13211	Putative_elincRNA	start_codon	114143	114145	.	-	0	gene_id "TCONS_00001337"; transcript_id "TCONS_00001337"; exon_number "1"; exon_id "TCONS_00001337.1";
Contig13211	Putative_elincRNA	exon	115093	115753	.	-	.	gene_id "TCONS_00001338"; transcript_id "TCONS_00001338"; exon_number "1"; exon_id "TCONS_00001338.1";
Contig13211	Putative_elincRNA	CDS	115096	115753	.	-	1	gene_id "TCONS_00001338"; transcript_id "TCONS_00001338"; exon_number "1"; exon_id "TCONS_00001338.1";
Contig13211	Putative_elincRNA	exon	115812	115939	.	-	.	gene_id "TCONS_00001338"; transcript_id "TCONS_00001338"; exon_number "2"; exon_id "TCONS_00001338.2";
Contig13211	Putative_elincRNA	CDS	115812	115939	.	-	0	gene_id "TCONS_00001338"; transcript_id "TCONS_00001338"; exon_number "2"; exon_id "TCONS_00001338.2";
Contig13211	Putative_elincRNA	start_codon	115937	115939	.	-	0	gene_id "TCONS_00001338"; transcript_id "TCONS_00001338"; exon_number "1"; exon_id "TCONS_00001338.1";
Contig13211	Putative_elincRNA	stop_codon	115093	115095	.	-	0	gene_id "TCONS_00001338"; transcript_id "TCONS_00001338"; exon_number "1"; exon_id "TCONS_00001338.1";
Contig13211	Putative_elincRNA	exon	115262	115753	.	+	.	gene_id "TCONS_00001331"; transcript_id "TCONS_00001331"; exon_number "1"; exon_id "TCONS_00001331.1";
Contig13211	Putative_elincRNA	CDS	115262	115753	.	+	0	gene_id "TCONS_00001331"; transcript_id "TCONS_00001331"; exon_number "1"; exon_id "TCONS_00001331.1";
Contig13211	Putative_elincRNA	exon	115812	115918	.	+	.	gene_id "TCONS_00001331"; transcript_id "TCONS_00001331"; exon_number "2"; exon_id "TCONS_00001331.2";
Contig13211	Putative_elincRNA	CDS	115812	115918	.	+	0	gene_id "TCONS_00001331"; transcript_id "TCONS_00001331"; exon_number "2"; exon_id "TCONS_00001331.2";
Contig13211	Putative_elincRNA	start_codon	115262	115264	.	+	0	gene_id "TCONS_00001331"; transcript_id "TCONS_00001331"; exon_number "1"; exon_id "TCONS_00001331.1";
Contig13216	Putative_elincRNA	exon	97805	98241	.	+	.	gene_id "TCONS_00001366"; transcript_id "TCONS_00001366"; exon_number "1"; exon_id "TCONS_00001366.1";
Contig13216	Putative_elincRNA	CDS	97805	98241	.	+	0	gene_id "TCONS_00001366"; transcript_id "TCONS_00001366"; exon_number "1"; exon_id "TCONS_00001366.1";
Contig13216	Putative_elincRNA	exon	98448	98629	.	+	.	gene_id "TCONS_00001366"; transcript_id "TCONS_00001366"; exon_number "2"; exon_id "TCONS_00001366.2";
Contig13216	Putative_elincRNA	CDS	98448	98629	.	+	1	gene_id "TCONS_00001366"; transcript_id "TCONS_00001366"; exon_number "2"; exon_id "TCONS_00001366.2";
Contig13216	Putative_elincRNA	exon	98645	98898	.	+	.	gene_id "TCONS_00001366"; transcript_id "TCONS_00001366"; exon_number "3"; exon_id "TCONS_00001366.3";
Contig13216	Putative_elincRNA	CDS	98645	98898	.	+	2	gene_id "TCONS_00001366"; transcript_id "TCONS_00001366"; exon_number "3"; exon_id "TCONS_00001366.3";
Contig13216	Putative_elincRNA	exon	98911	98957	.	+	.	gene_id "TCONS_00001366"; transcript_id "TCONS_00001366"; exon_number "4"; exon_id "TCONS_00001366.4";
Contig13216	Putative_elincRNA	CDS	98911	98957	.	+	0	gene_id "TCONS_00001366"; transcript_id "TCONS_00001366"; exon_number "4"; exon_id "TCONS_00001366.4";
Contig13216	Putative_elincRNA	start_codon	97805	97807	.	+	0	gene_id "TCONS_00001366"; transcript_id "TCONS_00001366"; exon_number "1"; exon_id "TCONS_00001366.1";
Contig13220	Putative_elincRNA	exon	44898	45278	.	-	.	gene_id "TCONS_00001386"; transcript_id "TCONS_00001386"; exon_number "1"; exon_id "TCONS_00001386.1";
Contig13220	Putative_elincRNA	CDS	44901	45278	.	-	0	gene_id "TCONS_00001386"; transcript_id "TCONS_00001386"; exon_number "1"; exon_id "TCONS_00001386.1";
Contig13220	Putative_elincRNA	start_codon	45276	45278	.	-	0	gene_id "TCONS_00001386"; transcript_id "TCONS_00001386"; exon_number "1"; exon_id "TCONS_00001386.1";
Contig13220	Putative_elincRNA	stop_codon	44898	44900	.	-	0	gene_id "TCONS_00001386"; transcript_id "TCONS_00001386"; exon_number "1"; exon_id "TCONS_00001386.1";
Contig13228	Putative_elincRNA	exon	71442	72612	.	-	.	gene_id "TCONS_00001415"; transcript_id "TCONS_00001415"; exon_number "1"; exon_id "TCONS_00001415.1";
Contig13228	Putative_elincRNA	CDS	71442	72612	.	-	0	gene_id "TCONS_00001415"; transcript_id "TCONS_00001415"; exon_number "1"; exon_id "TCONS_00001415.1";
Contig13228	Putative_elincRNA	start_codon	72610	72612	.	-	0	gene_id "TCONS_00001415"; transcript_id "TCONS_00001415"; exon_number "1"; exon_id "TCONS_00001415.1";
Contig13232	Putative_elincRNA	exon	18939	19432	.	+	.	gene_id "TCONS_00001427"; transcript_id "TCONS_00001427"; exon_number "1"; exon_id "TCONS_00001427.1";
Contig13232	Putative_elincRNA	CDS	18939	19432	.	+	0	gene_id "TCONS_00001427"; transcript_id "TCONS_00001427"; exon_number "1"; exon_id "TCONS_00001427.1";
Contig13232	Putative_elincRNA	start_codon	18939	18941	.	+	0	gene_id "TCONS_00001427"; transcript_id "TCONS_00001427"; exon_number "1"; exon_id "TCONS_00001427.1";
Contig13232	Putative_elincRNA	exon	34369	34727	.	+	.	gene_id "TCONS_00001432"; transcript_id "TCONS_00001432"; exon_number "1"; exon_id "TCONS_00001432.1";
Contig13232	Putative_elincRNA	CDS	34369	34727	.	+	0	gene_id "TCONS_00001432"; transcript_id "TCONS_00001432"; exon_number "1"; exon_id "TCONS_00001432.1";
Contig13232	Putative_elincRNA	start_codon	34369	34371	.	+	0	gene_id "TCONS_00001432"; transcript_id "TCONS_00001432"; exon_number "1"; exon_id "TCONS_00001432.1";
Contig13237	Putative_elincRNA	exon	1	527	.	+	.	gene_id "TCONS_00001441"; transcript_id "TCONS_00001441"; exon_number "1"; exon_id "TCONS_00001441.1";
Contig13237	Putative_elincRNA	CDS	1	527	.	+	0	gene_id "TCONS_00001441"; transcript_id "TCONS_00001441"; exon_number "1"; exon_id "TCONS_00001441.1";
Contig13237	Putative_elincRNA	start_codon	1	3	.	+	0	gene_id "TCONS_00001441"; transcript_id "TCONS_00001441"; exon_number "1"; exon_id "TCONS_00001441.1";
Contig13240	Putative_elincRNA	exon	36746	37339	.	-	.	gene_id "TCONS_00001460"; transcript_id "TCONS_00001460"; exon_number "1"; exon_id "TCONS_00001460.1";
Contig13240	Putative_elincRNA	CDS	36749	37339	.	-	0	gene_id "TCONS_00001460"; transcript_id "TCONS_00001460"; exon_number "1"; exon_id "TCONS_00001460.1";
Contig13240	Putative_elincRNA	start_codon	37337	37339	.	-	0	gene_id "TCONS_00001460"; transcript_id "TCONS_00001460"; exon_number "1"; exon_id "TCONS_00001460.1";
Contig13240	Putative_elincRNA	stop_codon	36746	36748	.	-	0	gene_id "TCONS_00001460"; transcript_id "TCONS_00001460"; exon_number "1"; exon_id "TCONS_00001460.1";
Contig13242	Putative_elincRNA	exon	3071	3461	.	-	.	gene_id "TCONS_00001468"; transcript_id "TCONS_00001468"; exon_number "1"; exon_id "TCONS_00001468.1";
Contig13242	Putative_elincRNA	CDS	3071	3461	.	-	0	gene_id "TCONS_00001468"; transcript_id "TCONS_00001468"; exon_number "1"; exon_id "TCONS_00001468.1";
Contig13242	Putative_elincRNA	start_codon	3459	3461	.	-	0	gene_id "TCONS_00001468"; transcript_id "TCONS_00001468"; exon_number "1"; exon_id "TCONS_00001468.1";
Contig13254	Putative_elincRNA	exon	135107	135432	.	+	.	gene_id "TCONS_00001526"; transcript_id "TCONS_00001526"; exon_number "1"; exon_id "TCONS_00001526.1";
Contig13254	Putative_elincRNA	CDS	135107	135432	.	+	0	gene_id "TCONS_00001526"; transcript_id "TCONS_00001526"; exon_number "1"; exon_id "TCONS_00001526.1";
Contig13254	Putative_elincRNA	start_codon	135107	135109	.	+	0	gene_id "TCONS_00001526"; transcript_id "TCONS_00001526"; exon_number "1"; exon_id "TCONS_00001526.1";
Contig13262	Putative_elincRNA	exon	55262	55525	.	-	.	gene_id "TCONS_00001563"; transcript_id "TCONS_00001563"; exon_number "1"; exon_id "TCONS_00001563.1";
Contig13262	Putative_elincRNA	CDS	55265	55525	.	-	0	gene_id "TCONS_00001563"; transcript_id "TCONS_00001563"; exon_number "1"; exon_id "TCONS_00001563.1";
Contig13262	Putative_elincRNA	start_codon	55523	55525	.	-	0	gene_id "TCONS_00001563"; transcript_id "TCONS_00001563"; exon_number "1"; exon_id "TCONS_00001563.1";
Contig13262	Putative_elincRNA	stop_codon	55262	55264	.	-	0	gene_id "TCONS_00001563"; transcript_id "TCONS_00001563"; exon_number "1"; exon_id "TCONS_00001563.1";
Contig13274	Putative_elincRNA	exon	66175	66182	.	+	.	gene_id "TCONS_00001613"; transcript_id "TCONS_00001613"; exon_number "1"; exon_id "TCONS_00001613.1";
Contig13274	Putative_elincRNA	CDS	66175	66182	.	+	0	gene_id "TCONS_00001613"; transcript_id "TCONS_00001613"; exon_number "1"; exon_id "TCONS_00001613.1";
Contig13274	Putative_elincRNA	exon	66235	66558	.	+	.	gene_id "TCONS_00001613"; transcript_id "TCONS_00001613"; exon_number "2"; exon_id "TCONS_00001613.2";
Contig13274	Putative_elincRNA	CDS	66235	66558	.	+	1	gene_id "TCONS_00001613"; transcript_id "TCONS_00001613"; exon_number "2"; exon_id "TCONS_00001613.2";
Contig13274	Putative_elincRNA	start_codon	66175	66177	.	+	0	gene_id "TCONS_00001613"; transcript_id "TCONS_00001613"; exon_number "1"; exon_id "TCONS_00001613.1";
Contig13278	Putative_elincRNA	exon	83482	83670	.	+	.	gene_id "TCONS_00001642"; transcript_id "TCONS_00001642"; exon_number "1"; exon_id "TCONS_00001642.1";
Contig13278	Putative_elincRNA	CDS	83482	83670	.	+	0	gene_id "TCONS_00001642"; transcript_id "TCONS_00001642"; exon_number "1"; exon_id "TCONS_00001642.1";
Contig13278	Putative_elincRNA	exon	84137	84326	.	+	.	gene_id "TCONS_00001642"; transcript_id "TCONS_00001642"; exon_number "2"; exon_id "TCONS_00001642.2";
Contig13278	Putative_elincRNA	CDS	84137	84326	.	+	0	gene_id "TCONS_00001642"; transcript_id "TCONS_00001642"; exon_number "2"; exon_id "TCONS_00001642.2";
Contig13278	Putative_elincRNA	exon	84374	84397	.	+	.	gene_id "TCONS_00001642"; transcript_id "TCONS_00001642"; exon_number "3"; exon_id "TCONS_00001642.3";
Contig13278	Putative_elincRNA	CDS	84374	84397	.	+	2	gene_id "TCONS_00001642"; transcript_id "TCONS_00001642"; exon_number "3"; exon_id "TCONS_00001642.3";
Contig13278	Putative_elincRNA	start_codon	83482	83484	.	+	0	gene_id "TCONS_00001642"; transcript_id "TCONS_00001642"; exon_number "1"; exon_id "TCONS_00001642.1";
Contig13283	Putative_elincRNA	exon	27581	27946	.	-	.	gene_id "TCONS_00001672"; transcript_id "TCONS_00001672"; exon_number "1"; exon_id "TCONS_00001672.1";
Contig13283	Putative_elincRNA	CDS	27584	27946	.	-	0	gene_id "TCONS_00001672"; transcript_id "TCONS_00001672"; exon_number "1"; exon_id "TCONS_00001672.1";
Contig13283	Putative_elincRNA	start_codon	27944	27946	.	-	0	gene_id "TCONS_00001672"; transcript_id "TCONS_00001672"; exon_number "1"; exon_id "TCONS_00001672.1";
Contig13283	Putative_elincRNA	stop_codon	27581	27583	.	-	0	gene_id "TCONS_00001672"; transcript_id "TCONS_00001672"; exon_number "1"; exon_id "TCONS_00001672.1";
Contig13289	Putative_elincRNA	exon	102287	102833	.	+	.	gene_id "TCONS_00001695"; transcript_id "TCONS_00001695"; exon_number "1"; exon_id "TCONS_00001695.1";
Contig13289	Putative_elincRNA	CDS	102287	102833	.	+	0	gene_id "TCONS_00001695"; transcript_id "TCONS_00001695"; exon_number "1"; exon_id "TCONS_00001695.1";
Contig13289	Putative_elincRNA	start_codon	102287	102289	.	+	0	gene_id "TCONS_00001695"; transcript_id "TCONS_00001695"; exon_number "1"; exon_id "TCONS_00001695.1";
Contig13289	Putative_elincRNA	exon	114369	115261	.	+	.	gene_id "TCONS_00001697"; transcript_id "TCONS_00001697"; exon_number "1"; exon_id "TCONS_00001697.1";
Contig13289	Putative_elincRNA	CDS	114369	115261	.	+	0	gene_id "TCONS_00001697"; transcript_id "TCONS_00001697"; exon_number "1"; exon_id "TCONS_00001697.1";
Contig13289	Putative_elincRNA	start_codon	114369	114371	.	+	0	gene_id "TCONS_00001697"; transcript_id "TCONS_00001697"; exon_number "1"; exon_id "TCONS_00001697.1";
Contig13289	Putative_elincRNA	exon	115888	116436	.	+	.	gene_id "TCONS_00001698"; transcript_id "TCONS_00001698"; exon_number "1"; exon_id "TCONS_00001698.1";
Contig13289	Putative_elincRNA	CDS	115888	116436	.	+	0	gene_id "TCONS_00001698"; transcript_id "TCONS_00001698"; exon_number "1"; exon_id "TCONS_00001698.1";
Contig13289	Putative_elincRNA	exon	116642	117069	.	+	.	gene_id "TCONS_00001698"; transcript_id "TCONS_00001698"; exon_number "2"; exon_id "TCONS_00001698.2";
Contig13289	Putative_elincRNA	CDS	116642	117069	.	+	0	gene_id "TCONS_00001698"; transcript_id "TCONS_00001698"; exon_number "2"; exon_id "TCONS_00001698.2";
Contig13289	Putative_elincRNA	start_codon	115888	115890	.	+	0	gene_id "TCONS_00001698"; transcript_id "TCONS_00001698"; exon_number "1"; exon_id "TCONS_00001698.1";
Contig13294	Putative_elincRNA	exon	78104	78126	.	-	.	gene_id "TCONS_00001748"; transcript_id "TCONS_00001748"; exon_number "1"; exon_id "TCONS_00001748.1";
Contig13294	Putative_elincRNA	CDS	78104	78126	.	-	0	gene_id "TCONS_00001748"; transcript_id "TCONS_00001748"; exon_number "1"; exon_id "TCONS_00001748.1";
Contig13294	Putative_elincRNA	exon	78186	78332	.	-	.	gene_id "TCONS_00001748"; transcript_id "TCONS_00001748"; exon_number "2"; exon_id "TCONS_00001748.2";
Contig13294	Putative_elincRNA	CDS	78186	78332	.	-	0	gene_id "TCONS_00001748"; transcript_id "TCONS_00001748"; exon_number "2"; exon_id "TCONS_00001748.2";
Contig13294	Putative_elincRNA	exon	78376	79014	.	-	.	gene_id "TCONS_00001748"; transcript_id "TCONS_00001748"; exon_number "3"; exon_id "TCONS_00001748.3";
Contig13294	Putative_elincRNA	CDS	78376	79014	.	-	0	gene_id "TCONS_00001748"; transcript_id "TCONS_00001748"; exon_number "3"; exon_id "TCONS_00001748.3";
Contig13294	Putative_elincRNA	exon	79064	79291	.	-	.	gene_id "TCONS_00001748"; transcript_id "TCONS_00001748"; exon_number "4"; exon_id "TCONS_00001748.4";
Contig13294	Putative_elincRNA	CDS	79064	79291	.	-	0	gene_id "TCONS_00001748"; transcript_id "TCONS_00001748"; exon_number "4"; exon_id "TCONS_00001748.4";
Contig13294	Putative_elincRNA	start_codon	79289	79291	.	-	0	gene_id "TCONS_00001748"; transcript_id "TCONS_00001748"; exon_number "1"; exon_id "TCONS_00001748.1";
Contig13294	Putative_elincRNA	exon	78459	78706	.	+	.	gene_id "TCONS_00001727"; transcript_id "TCONS_00001727"; exon_number "1"; exon_id "TCONS_00001727.1";
Contig13294	Putative_elincRNA	CDS	78459	78706	.	+	0	gene_id "TCONS_00001727"; transcript_id "TCONS_00001727"; exon_number "1"; exon_id "TCONS_00001727.1";
Contig13294	Putative_elincRNA	exon	78784	78959	.	+	.	gene_id "TCONS_00001727"; transcript_id "TCONS_00001727"; exon_number "2"; exon_id "TCONS_00001727.2";
Contig13294	Putative_elincRNA	CDS	78784	78959	.	+	1	gene_id "TCONS_00001727"; transcript_id "TCONS_00001727"; exon_number "2"; exon_id "TCONS_00001727.2";
Contig13294	Putative_elincRNA	exon	80897	81016	.	+	.	gene_id "TCONS_00001727"; transcript_id "TCONS_00001727"; exon_number "3"; exon_id "TCONS_00001727.3";
Contig13294	Putative_elincRNA	CDS	80897	81016	.	+	2	gene_id "TCONS_00001727"; transcript_id "TCONS_00001727"; exon_number "3"; exon_id "TCONS_00001727.3";
Contig13294	Putative_elincRNA	exon	81370	81515	.	+	.	gene_id "TCONS_00001727"; transcript_id "TCONS_00001727"; exon_number "4"; exon_id "TCONS_00001727.4";
Contig13294	Putative_elincRNA	CDS	81370	81515	.	+	2	gene_id "TCONS_00001727"; transcript_id "TCONS_00001727"; exon_number "4"; exon_id "TCONS_00001727.4";
Contig13294	Putative_elincRNA	exon	81666	81709	.	+	.	gene_id "TCONS_00001727"; transcript_id "TCONS_00001727"; exon_number "5"; exon_id "TCONS_00001727.5";
Contig13294	Putative_elincRNA	CDS	81666	81709	.	+	0	gene_id "TCONS_00001727"; transcript_id "TCONS_00001727"; exon_number "5"; exon_id "TCONS_00001727.5";
Contig13294	Putative_elincRNA	start_codon	78459	78461	.	+	0	gene_id "TCONS_00001727"; transcript_id "TCONS_00001727"; exon_number "1"; exon_id "TCONS_00001727.1";
Contig13294	Putative_elincRNA	exon	132012	132106	.	+	.	gene_id "TCONS_00001733"; transcript_id "TCONS_00001733"; exon_number "1"; exon_id "TCONS_00001733.1";
Contig13294	Putative_elincRNA	CDS	132012	132106	.	+	0	gene_id "TCONS_00001733"; transcript_id "TCONS_00001733"; exon_number "1"; exon_id "TCONS_00001733.1";
Contig13294	Putative_elincRNA	exon	134649	134772	.	+	.	gene_id "TCONS_00001733"; transcript_id "TCONS_00001733"; exon_number "2"; exon_id "TCONS_00001733.2";
Contig13294	Putative_elincRNA	CDS	134649	134772	.	+	1	gene_id "TCONS_00001733"; transcript_id "TCONS_00001733"; exon_number "2"; exon_id "TCONS_00001733.2";
Contig13294	Putative_elincRNA	exon	134812	134904	.	+	.	gene_id "TCONS_00001733"; transcript_id "TCONS_00001733"; exon_number "3"; exon_id "TCONS_00001733.3";
Contig13294	Putative_elincRNA	CDS	134812	134901	.	+	0	gene_id "TCONS_00001733"; transcript_id "TCONS_00001733"; exon_number "3"; exon_id "TCONS_00001733.3";
Contig13294	Putative_elincRNA	start_codon	132012	132014	.	+	0	gene_id "TCONS_00001733"; transcript_id "TCONS_00001733"; exon_number "1"; exon_id "TCONS_00001733.1";
Contig13294	Putative_elincRNA	stop_codon	134902	134904	.	+	0	gene_id "TCONS_00001733"; transcript_id "TCONS_00001733"; exon_number "1"; exon_id "TCONS_00001733.1";
Contig13297	Putative_elincRNA	exon	143631	143975	.	+	.	gene_id "TCONS_00001765"; transcript_id "TCONS_00001765"; exon_number "1"; exon_id "TCONS_00001765.1";
Contig13297	Putative_elincRNA	CDS	143631	143975	.	+	0	gene_id "TCONS_00001765"; transcript_id "TCONS_00001765"; exon_number "1"; exon_id "TCONS_00001765.1";
Contig13297	Putative_elincRNA	exon	144083	144159	.	+	.	gene_id "TCONS_00001765"; transcript_id "TCONS_00001765"; exon_number "2"; exon_id "TCONS_00001765.2";
Contig13297	Putative_elincRNA	CDS	144083	144159	.	+	0	gene_id "TCONS_00001765"; transcript_id "TCONS_00001765"; exon_number "2"; exon_id "TCONS_00001765.2";
Contig13297	Putative_elincRNA	start_codon	143631	143633	.	+	0	gene_id "TCONS_00001765"; transcript_id "TCONS_00001765"; exon_number "1"; exon_id "TCONS_00001765.1";
Contig13298	Putative_elincRNA	exon	151560	151631	.	-	.	gene_id "TCONS_00001770"; transcript_id "TCONS_00001770"; exon_number "1"; exon_id "TCONS_00001770.1";
Contig13298	Putative_elincRNA	CDS	151560	151631	.	-	1	gene_id "TCONS_00001770"; transcript_id "TCONS_00001770"; exon_number "1"; exon_id "TCONS_00001770.1";
Contig13298	Putative_elincRNA	exon	153705	154294	.	-	.	gene_id "TCONS_00001770"; transcript_id "TCONS_00001770"; exon_number "2"; exon_id "TCONS_00001770.2";
Contig13298	Putative_elincRNA	CDS	153705	154294	.	-	0	gene_id "TCONS_00001770"; transcript_id "TCONS_00001770"; exon_number "2"; exon_id "TCONS_00001770.2";
Contig13298	Putative_elincRNA	start_codon	154292	154294	.	-	0	gene_id "TCONS_00001770"; transcript_id "TCONS_00001770"; exon_number "1"; exon_id "TCONS_00001770.1";
Contig13313	Putative_elincRNA	exon	66766	66937	.	+	.	gene_id "TCONS_00001826"; transcript_id "TCONS_00001826"; exon_number "1"; exon_id "TCONS_00001826.1";
Contig13313	Putative_elincRNA	CDS	66766	66937	.	+	0	gene_id "TCONS_00001826"; transcript_id "TCONS_00001826"; exon_number "1"; exon_id "TCONS_00001826.1";
Contig13313	Putative_elincRNA	exon	67020	67081	.	+	.	gene_id "TCONS_00001826"; transcript_id "TCONS_00001826"; exon_number "2"; exon_id "TCONS_00001826.2";
Contig13313	Putative_elincRNA	CDS	67020	67081	.	+	2	gene_id "TCONS_00001826"; transcript_id "TCONS_00001826"; exon_number "2"; exon_id "TCONS_00001826.2";
Contig13313	Putative_elincRNA	exon	67089	67152	.	+	.	gene_id "TCONS_00001826"; transcript_id "TCONS_00001826"; exon_number "3"; exon_id "TCONS_00001826.3";
Contig13313	Putative_elincRNA	CDS	67089	67152	.	+	0	gene_id "TCONS_00001826"; transcript_id "TCONS_00001826"; exon_number "3"; exon_id "TCONS_00001826.3";
Contig13313	Putative_elincRNA	start_codon	66766	66768	.	+	0	gene_id "TCONS_00001826"; transcript_id "TCONS_00001826"; exon_number "1"; exon_id "TCONS_00001826.1";
Contig13315	Putative_elincRNA	exon	48752	48793	.	+	.	gene_id "TCONS_00001864"; transcript_id "TCONS_00001864"; exon_number "1"; exon_id "TCONS_00001864.1";
Contig13315	Putative_elincRNA	CDS	48752	48793	.	+	0	gene_id "TCONS_00001864"; transcript_id "TCONS_00001864"; exon_number "1"; exon_id "TCONS_00001864.1";
Contig13315	Putative_elincRNA	exon	48884	49078	.	+	.	gene_id "TCONS_00001864"; transcript_id "TCONS_00001864"; exon_number "2"; exon_id "TCONS_00001864.2";
Contig13315	Putative_elincRNA	CDS	48884	49078	.	+	0	gene_id "TCONS_00001864"; transcript_id "TCONS_00001864"; exon_number "2"; exon_id "TCONS_00001864.2";
Contig13315	Putative_elincRNA	exon	49409	49536	.	+	.	gene_id "TCONS_00001864"; transcript_id "TCONS_00001864"; exon_number "3"; exon_id "TCONS_00001864.3";
Contig13315	Putative_elincRNA	CDS	49409	49536	.	+	0	gene_id "TCONS_00001864"; transcript_id "TCONS_00001864"; exon_number "3"; exon_id "TCONS_00001864.3";
Contig13315	Putative_elincRNA	exon	49543	49612	.	+	.	gene_id "TCONS_00001864"; transcript_id "TCONS_00001864"; exon_number "4"; exon_id "TCONS_00001864.4";
Contig13315	Putative_elincRNA	CDS	49543	49609	.	+	1	gene_id "TCONS_00001864"; transcript_id "TCONS_00001864"; exon_number "4"; exon_id "TCONS_00001864.4";
Contig13315	Putative_elincRNA	start_codon	48752	48754	.	+	0	gene_id "TCONS_00001864"; transcript_id "TCONS_00001864"; exon_number "1"; exon_id "TCONS_00001864.1";
Contig13315	Putative_elincRNA	stop_codon	49610	49612	.	+	0	gene_id "TCONS_00001864"; transcript_id "TCONS_00001864"; exon_number "1"; exon_id "TCONS_00001864.1";
Contig13316	Putative_elincRNA	exon	5157	5572	.	+	.	gene_id "TCONS_00001883"; transcript_id "TCONS_00001883"; exon_number "1"; exon_id "TCONS_00001883.1";
Contig13316	Putative_elincRNA	CDS	5157	5572	.	+	0	gene_id "TCONS_00001883"; transcript_id "TCONS_00001883"; exon_number "1"; exon_id "TCONS_00001883.1";
Contig13316	Putative_elincRNA	start_codon	5157	5159	.	+	0	gene_id "TCONS_00001883"; transcript_id "TCONS_00001883"; exon_number "1"; exon_id "TCONS_00001883.1";
Contig13317	Putative_elincRNA	exon	89245	89602	.	-	.	gene_id "TCONS_00001915"; transcript_id "TCONS_00001915"; exon_number "1"; exon_id "TCONS_00001915.1";
Contig13317	Putative_elincRNA	CDS	89245	89602	.	-	0	gene_id "TCONS_00001915"; transcript_id "TCONS_00001915"; exon_number "1"; exon_id "TCONS_00001915.1";
Contig13317	Putative_elincRNA	start_codon	89600	89602	.	-	0	gene_id "TCONS_00001915"; transcript_id "TCONS_00001915"; exon_number "1"; exon_id "TCONS_00001915.1";
Contig13322	Putative_elincRNA	exon	43894	44443	.	-	.	gene_id "TCONS_00001945"; transcript_id "TCONS_00001945"; exon_number "1"; exon_id "TCONS_00001945.1";
Contig13322	Putative_elincRNA	CDS	43894	44443	.	-	0	gene_id "TCONS_00001945"; transcript_id "TCONS_00001945"; exon_number "1"; exon_id "TCONS_00001945.1";
Contig13322	Putative_elincRNA	start_codon	44441	44443	.	-	0	gene_id "TCONS_00001945"; transcript_id "TCONS_00001945"; exon_number "1"; exon_id "TCONS_00001945.1";
Contig13322	Putative_elincRNA	exon	43968	44250	.	+	.	gene_id "TCONS_00001941"; transcript_id "TCONS_00001941"; exon_number "1"; exon_id "TCONS_00001941.1";
Contig13322	Putative_elincRNA	CDS	43968	44250	.	+	0	gene_id "TCONS_00001941"; transcript_id "TCONS_00001941"; exon_number "1"; exon_id "TCONS_00001941.1";
Contig13322	Putative_elincRNA	start_codon	43968	43970	.	+	0	gene_id "TCONS_00001941"; transcript_id "TCONS_00001941"; exon_number "1"; exon_id "TCONS_00001941.1";
Contig13337	Putative_elincRNA	exon	156574	157646	.	+	.	gene_id "TCONS_00002019"; transcript_id "TCONS_00002019"; exon_number "1"; exon_id "TCONS_00002019.1";
Contig13337	Putative_elincRNA	CDS	156574	157646	.	+	0	gene_id "TCONS_00002019"; transcript_id "TCONS_00002019"; exon_number "1"; exon_id "TCONS_00002019.1";
Contig13337	Putative_elincRNA	start_codon	156574	156576	.	+	0	gene_id "TCONS_00002019"; transcript_id "TCONS_00002019"; exon_number "1"; exon_id "TCONS_00002019.1";
Contig13339	Putative_elincRNA	exon	98952	99284	.	-	.	gene_id "TCONS_00002054"; transcript_id "TCONS_00002054"; exon_number "1"; exon_id "TCONS_00002054.1";
Contig13339	Putative_elincRNA	CDS	98955	99284	.	-	0	gene_id "TCONS_00002054"; transcript_id "TCONS_00002054"; exon_number "1"; exon_id "TCONS_00002054.1";
Contig13339	Putative_elincRNA	start_codon	99282	99284	.	-	0	gene_id "TCONS_00002054"; transcript_id "TCONS_00002054"; exon_number "1"; exon_id "TCONS_00002054.1";
Contig13339	Putative_elincRNA	stop_codon	98952	98954	.	-	0	gene_id "TCONS_00002054"; transcript_id "TCONS_00002054"; exon_number "1"; exon_id "TCONS_00002054.1";
Contig13350	Putative_elincRNA	exon	125900	127046	.	-	.	gene_id "TCONS_00002147"; transcript_id "TCONS_00002147"; exon_number "1"; exon_id "TCONS_00002147.1";
Contig13350	Putative_elincRNA	CDS	125900	127046	.	-	0	gene_id "TCONS_00002147"; transcript_id "TCONS_00002147"; exon_number "1"; exon_id "TCONS_00002147.1";
Contig13350	Putative_elincRNA	start_codon	127044	127046	.	-	0	gene_id "TCONS_00002147"; transcript_id "TCONS_00002147"; exon_number "1"; exon_id "TCONS_00002147.1";
Contig13350	Putative_elincRNA	exon	144047	144100	.	+	.	gene_id "TCONS_00002142"; transcript_id "TCONS_00002142"; exon_number "1"; exon_id "TCONS_00002142.1";
Contig13350	Putative_elincRNA	CDS	144047	144100	.	+	0	gene_id "TCONS_00002142"; transcript_id "TCONS_00002142"; exon_number "1"; exon_id "TCONS_00002142.1";
Contig13350	Putative_elincRNA	exon	144202	144285	.	+	.	gene_id "TCONS_00002142"; transcript_id "TCONS_00002142"; exon_number "2"; exon_id "TCONS_00002142.2";
Contig13350	Putative_elincRNA	CDS	144202	144285	.	+	0	gene_id "TCONS_00002142"; transcript_id "TCONS_00002142"; exon_number "2"; exon_id "TCONS_00002142.2";
Contig13350	Putative_elincRNA	exon	144332	144725	.	+	.	gene_id "TCONS_00002142"; transcript_id "TCONS_00002142"; exon_number "3"; exon_id "TCONS_00002142.3";
Contig13350	Putative_elincRNA	CDS	144332	144725	.	+	0	gene_id "TCONS_00002142"; transcript_id "TCONS_00002142"; exon_number "3"; exon_id "TCONS_00002142.3";
Contig13350	Putative_elincRNA	start_codon	144047	144049	.	+	0	gene_id "TCONS_00002142"; transcript_id "TCONS_00002142"; exon_number "1"; exon_id "TCONS_00002142.1";
Contig13354	Putative_elincRNA	exon	61244	61549	.	+	.	gene_id "TCONS_00002175"; transcript_id "TCONS_00002175"; exon_number "1"; exon_id "TCONS_00002175.1";
Contig13354	Putative_elincRNA	CDS	61244	61549	.	+	0	gene_id "TCONS_00002175"; transcript_id "TCONS_00002175"; exon_number "1"; exon_id "TCONS_00002175.1";
Contig13354	Putative_elincRNA	exon	61596	61639	.	+	.	gene_id "TCONS_00002175"; transcript_id "TCONS_00002175"; exon_number "2"; exon_id "TCONS_00002175.2";
Contig13354	Putative_elincRNA	CDS	61596	61639	.	+	0	gene_id "TCONS_00002175"; transcript_id "TCONS_00002175"; exon_number "2"; exon_id "TCONS_00002175.2";
Contig13354	Putative_elincRNA	start_codon	61244	61246	.	+	0	gene_id "TCONS_00002175"; transcript_id "TCONS_00002175"; exon_number "1"; exon_id "TCONS_00002175.1";
Contig13365	Putative_elincRNA	exon	45277	45578	.	-	.	gene_id "TCONS_00002233"; transcript_id "TCONS_00002233"; exon_number "1"; exon_id "TCONS_00002233.1";
Contig13365	Putative_elincRNA	CDS	45277	45578	.	-	0	gene_id "TCONS_00002233"; transcript_id "TCONS_00002233"; exon_number "1"; exon_id "TCONS_00002233.1";
Contig13365	Putative_elincRNA	start_codon	45576	45578	.	-	0	gene_id "TCONS_00002233"; transcript_id "TCONS_00002233"; exon_number "1"; exon_id "TCONS_00002233.1";
Contig13374	Putative_elincRNA	exon	109786	110115	.	-	.	gene_id "TCONS_00002283"; transcript_id "TCONS_00002283"; exon_number "1"; exon_id "TCONS_00002283.1";
Contig13374	Putative_elincRNA	CDS	109789	110115	.	-	0	gene_id "TCONS_00002283"; transcript_id "TCONS_00002283"; exon_number "1"; exon_id "TCONS_00002283.1";
Contig13374	Putative_elincRNA	start_codon	110113	110115	.	-	0	gene_id "TCONS_00002283"; transcript_id "TCONS_00002283"; exon_number "1"; exon_id "TCONS_00002283.1";
Contig13374	Putative_elincRNA	stop_codon	109786	109788	.	-	0	gene_id "TCONS_00002283"; transcript_id "TCONS_00002283"; exon_number "1"; exon_id "TCONS_00002283.1";
Contig13380	Putative_elincRNA	exon	14868	15336	.	-	.	gene_id "TCONS_00002327"; transcript_id "TCONS_00002327"; exon_number "1"; exon_id "TCONS_00002327.1";
Contig13380	Putative_elincRNA	CDS	14868	15336	.	-	0	gene_id "TCONS_00002327"; transcript_id "TCONS_00002327"; exon_number "1"; exon_id "TCONS_00002327.1";
Contig13380	Putative_elincRNA	start_codon	15334	15336	.	-	0	gene_id "TCONS_00002327"; transcript_id "TCONS_00002327"; exon_number "1"; exon_id "TCONS_00002327.1";
Contig13381	Putative_elincRNA	exon	67604	68097	.	+	.	gene_id "TCONS_00002337"; transcript_id "TCONS_00002337"; exon_number "1"; exon_id "TCONS_00002337.1";
Contig13381	Putative_elincRNA	CDS	67604	68097	.	+	0	gene_id "TCONS_00002337"; transcript_id "TCONS_00002337"; exon_number "1"; exon_id "TCONS_00002337.1";
Contig13381	Putative_elincRNA	start_codon	67604	67606	.	+	0	gene_id "TCONS_00002337"; transcript_id "TCONS_00002337"; exon_number "1"; exon_id "TCONS_00002337.1";
Contig13391	Putative_elincRNA	exon	135026	135167	.	+	.	gene_id "TCONS_00002403"; transcript_id "TCONS_00002403"; exon_number "1"; exon_id "TCONS_00002403.1";
Contig13391	Putative_elincRNA	CDS	135026	135167	.	+	0	gene_id "TCONS_00002403"; transcript_id "TCONS_00002403"; exon_number "1"; exon_id "TCONS_00002403.1";
Contig13391	Putative_elincRNA	exon	135173	135229	.	+	.	gene_id "TCONS_00002403"; transcript_id "TCONS_00002403"; exon_number "2"; exon_id "TCONS_00002403.2";
Contig13391	Putative_elincRNA	CDS	135173	135229	.	+	2	gene_id "TCONS_00002403"; transcript_id "TCONS_00002403"; exon_number "2"; exon_id "TCONS_00002403.2";
Contig13391	Putative_elincRNA	exon	140768	141037	.	+	.	gene_id "TCONS_00002403"; transcript_id "TCONS_00002403"; exon_number "3"; exon_id "TCONS_00002403.3";
Contig13391	Putative_elincRNA	CDS	140768	141037	.	+	2	gene_id "TCONS_00002403"; transcript_id "TCONS_00002403"; exon_number "3"; exon_id "TCONS_00002403.3";
Contig13391	Putative_elincRNA	start_codon	135026	135028	.	+	0	gene_id "TCONS_00002403"; transcript_id "TCONS_00002403"; exon_number "1"; exon_id "TCONS_00002403.1";
Contig13391	Putative_elincRNA	exon	135133	135167	.	+	.	gene_id "TCONS_00002404"; transcript_id "TCONS_00002404"; exon_number "1"; exon_id "TCONS_00002404.1";
Contig13391	Putative_elincRNA	CDS	135133	135167	.	+	0	gene_id "TCONS_00002404"; transcript_id "TCONS_00002404"; exon_number "1"; exon_id "TCONS_00002404.1";
Contig13391	Putative_elincRNA	exon	135173	135770	.	+	.	gene_id "TCONS_00002404"; transcript_id "TCONS_00002404"; exon_number "2"; exon_id "TCONS_00002404.2";
Contig13391	Putative_elincRNA	CDS	135173	135770	.	+	1	gene_id "TCONS_00002404"; transcript_id "TCONS_00002404"; exon_number "2"; exon_id "TCONS_00002404.2";
Contig13391	Putative_elincRNA	exon	141313	141332	.	+	.	gene_id "TCONS_00002404"; transcript_id "TCONS_00002404"; exon_number "3"; exon_id "TCONS_00002404.3";
Contig13391	Putative_elincRNA	CDS	141313	141332	.	+	0	gene_id "TCONS_00002404"; transcript_id "TCONS_00002404"; exon_number "3"; exon_id "TCONS_00002404.3";
Contig13391	Putative_elincRNA	start_codon	135133	135135	.	+	0	gene_id "TCONS_00002404"; transcript_id "TCONS_00002404"; exon_number "1"; exon_id "TCONS_00002404.1";
Contig13391	Putative_elincRNA	exon	138396	138678	.	+	.	gene_id "TCONS_00002405"; transcript_id "TCONS_00002405"; exon_number "1"; exon_id "TCONS_00002405.1";
Contig13391	Putative_elincRNA	CDS	138396	138678	.	+	0	gene_id "TCONS_00002405"; transcript_id "TCONS_00002405"; exon_number "1"; exon_id "TCONS_00002405.1";
Contig13391	Putative_elincRNA	start_codon	138396	138398	.	+	0	gene_id "TCONS_00002405"; transcript_id "TCONS_00002405"; exon_number "1"; exon_id "TCONS_00002405.1";
Contig13392	Putative_elincRNA	exon	95349	95660	.	-	.	gene_id "TCONS_00002431"; transcript_id "TCONS_00002431"; exon_number "1"; exon_id "TCONS_00002431.1";
Contig13392	Putative_elincRNA	CDS	95352	95660	.	-	0	gene_id "TCONS_00002431"; transcript_id "TCONS_00002431"; exon_number "1"; exon_id "TCONS_00002431.1";
Contig13392	Putative_elincRNA	start_codon	95658	95660	.	-	0	gene_id "TCONS_00002431"; transcript_id "TCONS_00002431"; exon_number "1"; exon_id "TCONS_00002431.1";
Contig13392	Putative_elincRNA	stop_codon	95349	95351	.	-	0	gene_id "TCONS_00002431"; transcript_id "TCONS_00002431"; exon_number "1"; exon_id "TCONS_00002431.1";
Contig13394	Putative_elincRNA	exon	59029	59381	.	+	.	gene_id "TCONS_00002442"; transcript_id "TCONS_00002442"; exon_number "1"; exon_id "TCONS_00002442.1";
Contig13394	Putative_elincRNA	CDS	59029	59381	.	+	0	gene_id "TCONS_00002442"; transcript_id "TCONS_00002442"; exon_number "1"; exon_id "TCONS_00002442.1";
Contig13394	Putative_elincRNA	start_codon	59029	59031	.	+	0	gene_id "TCONS_00002442"; transcript_id "TCONS_00002442"; exon_number "1"; exon_id "TCONS_00002442.1";
Contig13396	Putative_elincRNA	exon	67159	67458	.	+	.	gene_id "TCONS_00002468"; transcript_id "TCONS_00002468"; exon_number "1"; exon_id "TCONS_00002468.1";
Contig13396	Putative_elincRNA	CDS	67159	67455	.	+	0	gene_id "TCONS_00002468"; transcript_id "TCONS_00002468"; exon_number "1"; exon_id "TCONS_00002468.1";
Contig13396	Putative_elincRNA	start_codon	67159	67161	.	+	0	gene_id "TCONS_00002468"; transcript_id "TCONS_00002468"; exon_number "1"; exon_id "TCONS_00002468.1";
Contig13396	Putative_elincRNA	stop_codon	67456	67458	.	+	0	gene_id "TCONS_00002468"; transcript_id "TCONS_00002468"; exon_number "1"; exon_id "TCONS_00002468.1";
Contig13400	Putative_elincRNA	exon	6339	6526	.	-	.	gene_id "TCONS_00002502"; transcript_id "TCONS_00002502"; exon_number "1"; exon_id "TCONS_00002502.1";
Contig13400	Putative_elincRNA	CDS	6342	6526	.	-	2	gene_id "TCONS_00002502"; transcript_id "TCONS_00002502"; exon_number "1"; exon_id "TCONS_00002502.1";
Contig13400	Putative_elincRNA	exon	6580	6739	.	-	.	gene_id "TCONS_00002502"; transcript_id "TCONS_00002502"; exon_number "2"; exon_id "TCONS_00002502.2";
Contig13400	Putative_elincRNA	CDS	6580	6739	.	-	0	gene_id "TCONS_00002502"; transcript_id "TCONS_00002502"; exon_number "2"; exon_id "TCONS_00002502.2";
Contig13400	Putative_elincRNA	start_codon	6737	6739	.	-	0	gene_id "TCONS_00002502"; transcript_id "TCONS_00002502"; exon_number "1"; exon_id "TCONS_00002502.1";
Contig13400	Putative_elincRNA	stop_codon	6339	6341	.	-	0	gene_id "TCONS_00002502"; transcript_id "TCONS_00002502"; exon_number "1"; exon_id "TCONS_00002502.1";
Contig13401	Putative_elincRNA	exon	92047	92352	.	+	.	gene_id "TCONS_00002509"; transcript_id "TCONS_00002509"; exon_number "1"; exon_id "TCONS_00002509.1";
Contig13401	Putative_elincRNA	CDS	92047	92349	.	+	0	gene_id "TCONS_00002509"; transcript_id "TCONS_00002509"; exon_number "1"; exon_id "TCONS_00002509.1";
Contig13401	Putative_elincRNA	start_codon	92047	92049	.	+	0	gene_id "TCONS_00002509"; transcript_id "TCONS_00002509"; exon_number "1"; exon_id "TCONS_00002509.1";
Contig13401	Putative_elincRNA	stop_codon	92350	92352	.	+	0	gene_id "TCONS_00002509"; transcript_id "TCONS_00002509"; exon_number "1"; exon_id "TCONS_00002509.1";
Contig13401	Putative_elincRNA	exon	93455	93761	.	-	.	gene_id "TCONS_00002518"; transcript_id "TCONS_00002518"; exon_number "1"; exon_id "TCONS_00002518.1";
Contig13401	Putative_elincRNA	CDS	93455	93761	.	-	0	gene_id "TCONS_00002518"; transcript_id "TCONS_00002518"; exon_number "1"; exon_id "TCONS_00002518.1";
Contig13401	Putative_elincRNA	start_codon	93759	93761	.	-	0	gene_id "TCONS_00002518"; transcript_id "TCONS_00002518"; exon_number "1"; exon_id "TCONS_00002518.1";
Contig13403	Putative_elincRNA	exon	226857	227196	.	-	.	gene_id "TCONS_00002534"; transcript_id "TCONS_00002534"; exon_number "1"; exon_id "TCONS_00002534.1";
Contig13403	Putative_elincRNA	CDS	226857	227196	.	-	0	gene_id "TCONS_00002534"; transcript_id "TCONS_00002534"; exon_number "1"; exon_id "TCONS_00002534.1";
Contig13403	Putative_elincRNA	start_codon	227194	227196	.	-	0	gene_id "TCONS_00002534"; transcript_id "TCONS_00002534"; exon_number "1"; exon_id "TCONS_00002534.1";
Contig13413	Putative_elincRNA	exon	92880	93213	.	-	.	gene_id "TCONS_00002613"; transcript_id "TCONS_00002613"; exon_number "1"; exon_id "TCONS_00002613.1";
Contig13413	Putative_elincRNA	CDS	92880	93213	.	-	0	gene_id "TCONS_00002613"; transcript_id "TCONS_00002613"; exon_number "1"; exon_id "TCONS_00002613.1";
Contig13413	Putative_elincRNA	start_codon	93211	93213	.	-	0	gene_id "TCONS_00002613"; transcript_id "TCONS_00002613"; exon_number "1"; exon_id "TCONS_00002613.1";
Contig13415	Putative_elincRNA	exon	222499	222642	.	-	.	gene_id "TCONS_00002634"; transcript_id "TCONS_00002634"; exon_number "1"; exon_id "TCONS_00002634.1";
Contig13415	Putative_elincRNA	CDS	222502	222642	.	-	0	gene_id "TCONS_00002634"; transcript_id "TCONS_00002634"; exon_number "1"; exon_id "TCONS_00002634.1";
Contig13415	Putative_elincRNA	start_codon	222640	222642	.	-	0	gene_id "TCONS_00002634"; transcript_id "TCONS_00002634"; exon_number "1"; exon_id "TCONS_00002634.1";
Contig13415	Putative_elincRNA	stop_codon	222499	222501	.	-	0	gene_id "TCONS_00002634"; transcript_id "TCONS_00002634"; exon_number "1"; exon_id "TCONS_00002634.1";
Contig13418	Putative_elincRNA	exon	80474	80931	.	-	.	gene_id "TCONS_00002658"; transcript_id "TCONS_00002658"; exon_number "1"; exon_id "TCONS_00002658.1";
Contig13418	Putative_elincRNA	CDS	80474	80931	.	-	0	gene_id "TCONS_00002658"; transcript_id "TCONS_00002658"; exon_number "1"; exon_id "TCONS_00002658.1";
Contig13418	Putative_elincRNA	start_codon	80929	80931	.	-	0	gene_id "TCONS_00002658"; transcript_id "TCONS_00002658"; exon_number "1"; exon_id "TCONS_00002658.1";
Contig13418	Putative_elincRNA	exon	85801	85882	.	-	.	gene_id "TCONS_00002659"; transcript_id "TCONS_00002659"; exon_number "1"; exon_id "TCONS_00002659.1";
Contig13418	Putative_elincRNA	CDS	85801	85882	.	-	0	gene_id "TCONS_00002659"; transcript_id "TCONS_00002659"; exon_number "1"; exon_id "TCONS_00002659.1";
Contig13418	Putative_elincRNA	start_codon	85880	85882	.	-	0	gene_id "TCONS_00002659"; transcript_id "TCONS_00002659"; exon_number "1"; exon_id "TCONS_00002659.1";
Contig13420	Putative_elincRNA	exon	161782	162212	.	-	.	gene_id "TCONS_00002681"; transcript_id "TCONS_00002681"; exon_number "1"; exon_id "TCONS_00002681.1";
Contig13420	Putative_elincRNA	CDS	161782	162212	.	-	0	gene_id "TCONS_00002681"; transcript_id "TCONS_00002681"; exon_number "1"; exon_id "TCONS_00002681.1";
Contig13420	Putative_elincRNA	start_codon	162210	162212	.	-	0	gene_id "TCONS_00002681"; transcript_id "TCONS_00002681"; exon_number "1"; exon_id "TCONS_00002681.1";
Contig13424	Putative_elincRNA	exon	87207	87853	.	+	.	gene_id "TCONS_00002726"; transcript_id "TCONS_00002726"; exon_number "1"; exon_id "TCONS_00002726.1";
Contig13424	Putative_elincRNA	CDS	87207	87853	.	+	0	gene_id "TCONS_00002726"; transcript_id "TCONS_00002726"; exon_number "1"; exon_id "TCONS_00002726.1";
Contig13424	Putative_elincRNA	exon	87902	88052	.	+	.	gene_id "TCONS_00002726"; transcript_id "TCONS_00002726"; exon_number "2"; exon_id "TCONS_00002726.2";
Contig13424	Putative_elincRNA	CDS	87902	88049	.	+	1	gene_id "TCONS_00002726"; transcript_id "TCONS_00002726"; exon_number "2"; exon_id "TCONS_00002726.2";
Contig13424	Putative_elincRNA	start_codon	87207	87209	.	+	0	gene_id "TCONS_00002726"; transcript_id "TCONS_00002726"; exon_number "1"; exon_id "TCONS_00002726.1";
Contig13424	Putative_elincRNA	stop_codon	88050	88052	.	+	0	gene_id "TCONS_00002726"; transcript_id "TCONS_00002726"; exon_number "1"; exon_id "TCONS_00002726.1";
Contig13428	Putative_elincRNA	exon	252501	252538	.	+	.	gene_id "TCONS_00002754"; transcript_id "TCONS_00002754"; exon_number "1"; exon_id "TCONS_00002754.1";
Contig13428	Putative_elincRNA	CDS	252501	252538	.	+	0	gene_id "TCONS_00002754"; transcript_id "TCONS_00002754"; exon_number "1"; exon_id "TCONS_00002754.1";
Contig13428	Putative_elincRNA	exon	252878	253099	.	+	.	gene_id "TCONS_00002754"; transcript_id "TCONS_00002754"; exon_number "2"; exon_id "TCONS_00002754.2";
Contig13428	Putative_elincRNA	CDS	252878	253099	.	+	1	gene_id "TCONS_00002754"; transcript_id "TCONS_00002754"; exon_number "2"; exon_id "TCONS_00002754.2";
Contig13428	Putative_elincRNA	start_codon	252501	252503	.	+	0	gene_id "TCONS_00002754"; transcript_id "TCONS_00002754"; exon_number "1"; exon_id "TCONS_00002754.1";
Contig13428	Putative_elincRNA	exon	258469	258924	.	-	.	gene_id "TCONS_00002759"; transcript_id "TCONS_00002759"; exon_number "1"; exon_id "TCONS_00002759.1";
Contig13428	Putative_elincRNA	CDS	258472	258924	.	-	0	gene_id "TCONS_00002759"; transcript_id "TCONS_00002759"; exon_number "1"; exon_id "TCONS_00002759.1";
Contig13428	Putative_elincRNA	start_codon	258922	258924	.	-	0	gene_id "TCONS_00002759"; transcript_id "TCONS_00002759"; exon_number "1"; exon_id "TCONS_00002759.1";
Contig13428	Putative_elincRNA	stop_codon	258469	258471	.	-	0	gene_id "TCONS_00002759"; transcript_id "TCONS_00002759"; exon_number "1"; exon_id "TCONS_00002759.1";
Contig13429	Putative_elincRNA	exon	139528	139970	.	-	.	gene_id "TCONS_00002770"; transcript_id "TCONS_00002770"; exon_number "1"; exon_id "TCONS_00002770.1";
Contig13429	Putative_elincRNA	CDS	139528	139970	.	-	0	gene_id "TCONS_00002770"; transcript_id "TCONS_00002770"; exon_number "1"; exon_id "TCONS_00002770.1";
Contig13429	Putative_elincRNA	start_codon	139968	139970	.	-	0	gene_id "TCONS_00002770"; transcript_id "TCONS_00002770"; exon_number "1"; exon_id "TCONS_00002770.1";
Contig13431	Putative_elincRNA	exon	260313	260456	.	-	.	gene_id "TCONS_00002784"; transcript_id "TCONS_00002784"; exon_number "1"; exon_id "TCONS_00002784.1";
Contig13431	Putative_elincRNA	CDS	260316	260456	.	-	0	gene_id "TCONS_00002784"; transcript_id "TCONS_00002784"; exon_number "1"; exon_id "TCONS_00002784.1";
Contig13431	Putative_elincRNA	start_codon	260454	260456	.	-	0	gene_id "TCONS_00002784"; transcript_id "TCONS_00002784"; exon_number "1"; exon_id "TCONS_00002784.1";
Contig13431	Putative_elincRNA	stop_codon	260313	260315	.	-	0	gene_id "TCONS_00002784"; transcript_id "TCONS_00002784"; exon_number "1"; exon_id "TCONS_00002784.1";
Contig13433	Putative_elincRNA	exon	243981	244261	.	-	.	gene_id "TCONS_00002793"; transcript_id "TCONS_00002793"; exon_number "1"; exon_id "TCONS_00002793.1";
Contig13433	Putative_elincRNA	CDS	243981	244261	.	-	1	gene_id "TCONS_00002793"; transcript_id "TCONS_00002793"; exon_number "1"; exon_id "TCONS_00002793.1";
Contig13433	Putative_elincRNA	exon	244267	244682	.	-	.	gene_id "TCONS_00002793"; transcript_id "TCONS_00002793"; exon_number "2"; exon_id "TCONS_00002793.2";
Contig13433	Putative_elincRNA	CDS	244267	244682	.	-	0	gene_id "TCONS_00002793"; transcript_id "TCONS_00002793"; exon_number "2"; exon_id "TCONS_00002793.2";
Contig13433	Putative_elincRNA	start_codon	244680	244682	.	-	0	gene_id "TCONS_00002793"; transcript_id "TCONS_00002793"; exon_number "1"; exon_id "TCONS_00002793.1";
Contig13434	Putative_elincRNA	exon	150403	150704	.	+	.	gene_id "TCONS_00002797"; transcript_id "TCONS_00002797"; exon_number "1"; exon_id "TCONS_00002797.1";
Contig13434	Putative_elincRNA	CDS	150403	150704	.	+	0	gene_id "TCONS_00002797"; transcript_id "TCONS_00002797"; exon_number "1"; exon_id "TCONS_00002797.1";
Contig13434	Putative_elincRNA	start_codon	150403	150405	.	+	0	gene_id "TCONS_00002797"; transcript_id "TCONS_00002797"; exon_number "1"; exon_id "TCONS_00002797.1";
Contig13436	Putative_elincRNA	exon	180684	180984	.	+	.	gene_id "TCONS_00002826"; transcript_id "TCONS_00002826"; exon_number "1"; exon_id "TCONS_00002826.1";
Contig13436	Putative_elincRNA	CDS	180684	180984	.	+	0	gene_id "TCONS_00002826"; transcript_id "TCONS_00002826"; exon_number "1"; exon_id "TCONS_00002826.1";
Contig13436	Putative_elincRNA	exon	181000	181031	.	+	.	gene_id "TCONS_00002826"; transcript_id "TCONS_00002826"; exon_number "2"; exon_id "TCONS_00002826.2";
Contig13436	Putative_elincRNA	CDS	181000	181031	.	+	2	gene_id "TCONS_00002826"; transcript_id "TCONS_00002826"; exon_number "2"; exon_id "TCONS_00002826.2";
Contig13436	Putative_elincRNA	exon	181091	181226	.	+	.	gene_id "TCONS_00002826"; transcript_id "TCONS_00002826"; exon_number "3"; exon_id "TCONS_00002826.3";
Contig13436	Putative_elincRNA	CDS	181091	181226	.	+	0	gene_id "TCONS_00002826"; transcript_id "TCONS_00002826"; exon_number "3"; exon_id "TCONS_00002826.3";
Contig13436	Putative_elincRNA	start_codon	180684	180686	.	+	0	gene_id "TCONS_00002826"; transcript_id "TCONS_00002826"; exon_number "1"; exon_id "TCONS_00002826.1";
Contig13442	Putative_elincRNA	exon	194647	194953	.	+	.	gene_id "TCONS_00002910"; transcript_id "TCONS_00002910"; exon_number "1"; exon_id "TCONS_00002910.1";
Contig13442	Putative_elincRNA	CDS	194647	194953	.	+	0	gene_id "TCONS_00002910"; transcript_id "TCONS_00002910"; exon_number "1"; exon_id "TCONS_00002910.1";
Contig13442	Putative_elincRNA	start_codon	194647	194649	.	+	0	gene_id "TCONS_00002910"; transcript_id "TCONS_00002910"; exon_number "1"; exon_id "TCONS_00002910.1";
Contig13447	Putative_elincRNA	exon	192550	192728	.	+	.	gene_id "TCONS_00002957"; transcript_id "TCONS_00002957"; exon_number "1"; exon_id "TCONS_00002957.1";
Contig13447	Putative_elincRNA	CDS	192550	192728	.	+	0	gene_id "TCONS_00002957"; transcript_id "TCONS_00002957"; exon_number "1"; exon_id "TCONS_00002957.1";
Contig13447	Putative_elincRNA	exon	192782	192871	.	+	.	gene_id "TCONS_00002957"; transcript_id "TCONS_00002957"; exon_number "2"; exon_id "TCONS_00002957.2";
Contig13447	Putative_elincRNA	CDS	192782	192871	.	+	1	gene_id "TCONS_00002957"; transcript_id "TCONS_00002957"; exon_number "2"; exon_id "TCONS_00002957.2";
Contig13447	Putative_elincRNA	exon	192994	193077	.	+	.	gene_id "TCONS_00002957"; transcript_id "TCONS_00002957"; exon_number "3"; exon_id "TCONS_00002957.3";
Contig13447	Putative_elincRNA	CDS	192994	193077	.	+	1	gene_id "TCONS_00002957"; transcript_id "TCONS_00002957"; exon_number "3"; exon_id "TCONS_00002957.3";
Contig13447	Putative_elincRNA	start_codon	192550	192552	.	+	0	gene_id "TCONS_00002957"; transcript_id "TCONS_00002957"; exon_number "1"; exon_id "TCONS_00002957.1";
Contig13447	Putative_elincRNA	exon	192552	192728	.	-	.	gene_id "TCONS_00002977"; transcript_id "TCONS_00002977"; exon_number "1"; exon_id "TCONS_00002977.1";
Contig13447	Putative_elincRNA	CDS	192555	192728	.	-	0	gene_id "TCONS_00002977"; transcript_id "TCONS_00002977"; exon_number "1"; exon_id "TCONS_00002977.1";
Contig13447	Putative_elincRNA	exon	192782	192871	.	-	.	gene_id "TCONS_00002977"; transcript_id "TCONS_00002977"; exon_number "2"; exon_id "TCONS_00002977.2";
Contig13447	Putative_elincRNA	CDS	192782	192871	.	-	0	gene_id "TCONS_00002977"; transcript_id "TCONS_00002977"; exon_number "2"; exon_id "TCONS_00002977.2";
Contig13447	Putative_elincRNA	exon	192994	193077	.	-	.	gene_id "TCONS_00002977"; transcript_id "TCONS_00002977"; exon_number "3"; exon_id "TCONS_00002977.3";
Contig13447	Putative_elincRNA	CDS	192994	193077	.	-	0	gene_id "TCONS_00002977"; transcript_id "TCONS_00002977"; exon_number "3"; exon_id "TCONS_00002977.3";
Contig13447	Putative_elincRNA	start_codon	193075	193077	.	-	0	gene_id "TCONS_00002977"; transcript_id "TCONS_00002977"; exon_number "1"; exon_id "TCONS_00002977.1";
Contig13447	Putative_elincRNA	stop_codon	192552	192554	.	-	0	gene_id "TCONS_00002977"; transcript_id "TCONS_00002977"; exon_number "1"; exon_id "TCONS_00002977.1";
Contig13463	Putative_elincRNA	exon	271925	272324	.	+	.	gene_id "TCONS_00003176"; transcript_id "TCONS_00003176"; exon_number "1"; exon_id "TCONS_00003176.1";
Contig13463	Putative_elincRNA	CDS	271925	272324	.	+	0	gene_id "TCONS_00003176"; transcript_id "TCONS_00003176"; exon_number "1"; exon_id "TCONS_00003176.1";
Contig13463	Putative_elincRNA	start_codon	271925	271927	.	+	0	gene_id "TCONS_00003176"; transcript_id "TCONS_00003176"; exon_number "1"; exon_id "TCONS_00003176.1";
Contig13468	Putative_elincRNA	exon	112178	112248	.	+	.	gene_id "TCONS_00003256"; transcript_id "TCONS_00003256"; exon_number "1"; exon_id "TCONS_00003256.1";
Contig13468	Putative_elincRNA	CDS	112178	112248	.	+	0	gene_id "TCONS_00003256"; transcript_id "TCONS_00003256"; exon_number "1"; exon_id "TCONS_00003256.1";
Contig13468	Putative_elincRNA	start_codon	112178	112180	.	+	0	gene_id "TCONS_00003256"; transcript_id "TCONS_00003256"; exon_number "1"; exon_id "TCONS_00003256.1";
Contig13468	Putative_elincRNA	exon	112181	112256	.	-	.	gene_id "TCONS_00003267"; transcript_id "TCONS_00003267"; exon_number "1"; exon_id "TCONS_00003267.1";
Contig13468	Putative_elincRNA	CDS	112181	112256	.	-	0	gene_id "TCONS_00003267"; transcript_id "TCONS_00003267"; exon_number "1"; exon_id "TCONS_00003267.1";
Contig13468	Putative_elincRNA	start_codon	112254	112256	.	-	0	gene_id "TCONS_00003267"; transcript_id "TCONS_00003267"; exon_number "1"; exon_id "TCONS_00003267.1";
Contig13471	Putative_elincRNA	exon	141958	142276	.	-	.	gene_id "TCONS_00003313"; transcript_id "TCONS_00003313"; exon_number "1"; exon_id "TCONS_00003313.1";
Contig13471	Putative_elincRNA	CDS	141958	142276	.	-	0	gene_id "TCONS_00003313"; transcript_id "TCONS_00003313"; exon_number "1"; exon_id "TCONS_00003313.1";
Contig13471	Putative_elincRNA	start_codon	142274	142276	.	-	0	gene_id "TCONS_00003313"; transcript_id "TCONS_00003313"; exon_number "1"; exon_id "TCONS_00003313.1";
Contig13472	Putative_elincRNA	exon	75870	76141	.	-	.	gene_id "TCONS_00003333"; transcript_id "TCONS_00003333"; exon_number "1"; exon_id "TCONS_00003333.1";
Contig13472	Putative_elincRNA	CDS	75870	76141	.	-	0	gene_id "TCONS_00003333"; transcript_id "TCONS_00003333"; exon_number "1"; exon_id "TCONS_00003333.1";
Contig13472	Putative_elincRNA	start_codon	76139	76141	.	-	0	gene_id "TCONS_00003333"; transcript_id "TCONS_00003333"; exon_number "1"; exon_id "TCONS_00003333.1";
Contig13474	Putative_elincRNA	exon	326650	326957	.	-	.	gene_id "TCONS_00003371"; transcript_id "TCONS_00003371"; exon_number "1"; exon_id "TCONS_00003371.1";
Contig13474	Putative_elincRNA	CDS	326650	326957	.	-	0	gene_id "TCONS_00003371"; transcript_id "TCONS_00003371"; exon_number "1"; exon_id "TCONS_00003371.1";
Contig13474	Putative_elincRNA	start_codon	326955	326957	.	-	0	gene_id "TCONS_00003371"; transcript_id "TCONS_00003371"; exon_number "1"; exon_id "TCONS_00003371.1";
Contig13480	Putative_elincRNA	exon	201693	201711	.	-	.	gene_id "TCONS_00003452"; transcript_id "TCONS_00003452"; exon_number "1"; exon_id "TCONS_00003452.1";
Contig13480	Putative_elincRNA	CDS	201693	201711	.	-	2	gene_id "TCONS_00003452"; transcript_id "TCONS_00003452"; exon_number "1"; exon_id "TCONS_00003452.1";
Contig13480	Putative_elincRNA	exon	201771	202110	.	-	.	gene_id "TCONS_00003452"; transcript_id "TCONS_00003452"; exon_number "2"; exon_id "TCONS_00003452.2";
Contig13480	Putative_elincRNA	CDS	201771	202110	.	-	0	gene_id "TCONS_00003452"; transcript_id "TCONS_00003452"; exon_number "2"; exon_id "TCONS_00003452.2";
Contig13480	Putative_elincRNA	start_codon	202108	202110	.	-	0	gene_id "TCONS_00003452"; transcript_id "TCONS_00003452"; exon_number "1"; exon_id "TCONS_00003452.1";
Contig13482	Putative_elincRNA	exon	39248	39498	.	+	.	gene_id "TCONS_00003475"; transcript_id "TCONS_00003475"; exon_number "1"; exon_id "TCONS_00003475.1";
Contig13482	Putative_elincRNA	CDS	39248	39498	.	+	0	gene_id "TCONS_00003475"; transcript_id "TCONS_00003475"; exon_number "1"; exon_id "TCONS_00003475.1";
Contig13482	Putative_elincRNA	exon	39505	39879	.	+	.	gene_id "TCONS_00003475"; transcript_id "TCONS_00003475"; exon_number "2"; exon_id "TCONS_00003475.2";
Contig13482	Putative_elincRNA	CDS	39505	39879	.	+	1	gene_id "TCONS_00003475"; transcript_id "TCONS_00003475"; exon_number "2"; exon_id "TCONS_00003475.2";
Contig13482	Putative_elincRNA	exon	39885	39940	.	+	.	gene_id "TCONS_00003475"; transcript_id "TCONS_00003475"; exon_number "3"; exon_id "TCONS_00003475.3";
Contig13482	Putative_elincRNA	CDS	39885	39940	.	+	1	gene_id "TCONS_00003475"; transcript_id "TCONS_00003475"; exon_number "3"; exon_id "TCONS_00003475.3";
Contig13482	Putative_elincRNA	start_codon	39248	39250	.	+	0	gene_id "TCONS_00003475"; transcript_id "TCONS_00003475"; exon_number "1"; exon_id "TCONS_00003475.1";
Contig13482	Putative_elincRNA	exon	39248	39496	.	+	.	gene_id "TCONS_00003476"; transcript_id "TCONS_00003476"; exon_number "1"; exon_id "TCONS_00003476.1";
Contig13482	Putative_elincRNA	CDS	39248	39496	.	+	0	gene_id "TCONS_00003476"; transcript_id "TCONS_00003476"; exon_number "1"; exon_id "TCONS_00003476.1";
Contig13482	Putative_elincRNA	exon	39503	39622	.	+	.	gene_id "TCONS_00003476"; transcript_id "TCONS_00003476"; exon_number "2"; exon_id "TCONS_00003476.2";
Contig13482	Putative_elincRNA	CDS	39503	39622	.	+	0	gene_id "TCONS_00003476"; transcript_id "TCONS_00003476"; exon_number "2"; exon_id "TCONS_00003476.2";
Contig13482	Putative_elincRNA	exon	40017	40123	.	+	.	gene_id "TCONS_00003476"; transcript_id "TCONS_00003476"; exon_number "3"; exon_id "TCONS_00003476.3";
Contig13482	Putative_elincRNA	CDS	40017	40123	.	+	0	gene_id "TCONS_00003476"; transcript_id "TCONS_00003476"; exon_number "3"; exon_id "TCONS_00003476.3";
Contig13482	Putative_elincRNA	start_codon	39248	39250	.	+	0	gene_id "TCONS_00003476"; transcript_id "TCONS_00003476"; exon_number "1"; exon_id "TCONS_00003476.1";
Contig13482	Putative_elincRNA	exon	41159	41439	.	-	.	gene_id "TCONS_00003501"; transcript_id "TCONS_00003501"; exon_number "1"; exon_id "TCONS_00003501.1";
Contig13482	Putative_elincRNA	CDS	41159	41439	.	-	0	gene_id "TCONS_00003501"; transcript_id "TCONS_00003501"; exon_number "1"; exon_id "TCONS_00003501.1";
Contig13482	Putative_elincRNA	exon	41489	41589	.	-	.	gene_id "TCONS_00003501"; transcript_id "TCONS_00003501"; exon_number "2"; exon_id "TCONS_00003501.2";
Contig13482	Putative_elincRNA	CDS	41489	41589	.	-	2	gene_id "TCONS_00003501"; transcript_id "TCONS_00003501"; exon_number "2"; exon_id "TCONS_00003501.2";
Contig13482	Putative_elincRNA	exon	41645	41663	.	-	.	gene_id "TCONS_00003501"; transcript_id "TCONS_00003501"; exon_number "3"; exon_id "TCONS_00003501.3";
Contig13482	Putative_elincRNA	CDS	41645	41663	.	-	0	gene_id "TCONS_00003501"; transcript_id "TCONS_00003501"; exon_number "3"; exon_id "TCONS_00003501.3";
Contig13482	Putative_elincRNA	start_codon	41661	41663	.	-	0	gene_id "TCONS_00003501"; transcript_id "TCONS_00003501"; exon_number "1"; exon_id "TCONS_00003501.1";
Contig13482	Putative_elincRNA	exon	130482	130572	.	+	.	gene_id "TCONS_00003484"; transcript_id "TCONS_00003484"; exon_number "1"; exon_id "TCONS_00003484.1";
Contig13482	Putative_elincRNA	CDS	130482	130572	.	+	0	gene_id "TCONS_00003484"; transcript_id "TCONS_00003484"; exon_number "1"; exon_id "TCONS_00003484.1";
Contig13482	Putative_elincRNA	exon	130615	130834	.	+	.	gene_id "TCONS_00003484"; transcript_id "TCONS_00003484"; exon_number "2"; exon_id "TCONS_00003484.2";
Contig13482	Putative_elincRNA	CDS	130615	130834	.	+	2	gene_id "TCONS_00003484"; transcript_id "TCONS_00003484"; exon_number "2"; exon_id "TCONS_00003484.2";
Contig13482	Putative_elincRNA	start_codon	130482	130484	.	+	0	gene_id "TCONS_00003484"; transcript_id "TCONS_00003484"; exon_number "1"; exon_id "TCONS_00003484.1";
Contig13484	Putative_elincRNA	exon	213290	213720	.	-	.	gene_id "TCONS_00003532"; transcript_id "TCONS_00003532"; exon_number "1"; exon_id "TCONS_00003532.1";
Contig13484	Putative_elincRNA	CDS	213290	213720	.	-	0	gene_id "TCONS_00003532"; transcript_id "TCONS_00003532"; exon_number "1"; exon_id "TCONS_00003532.1";
Contig13484	Putative_elincRNA	start_codon	213718	213720	.	-	0	gene_id "TCONS_00003532"; transcript_id "TCONS_00003532"; exon_number "1"; exon_id "TCONS_00003532.1";
Contig13491	Putative_elincRNA	exon	76205	76710	.	+	.	gene_id "TCONS_00003676"; transcript_id "TCONS_00003676"; exon_number "1"; exon_id "TCONS_00003676.1";
Contig13491	Putative_elincRNA	CDS	76205	76710	.	+	0	gene_id "TCONS_00003676"; transcript_id "TCONS_00003676"; exon_number "1"; exon_id "TCONS_00003676.1";
Contig13491	Putative_elincRNA	start_codon	76205	76207	.	+	0	gene_id "TCONS_00003676"; transcript_id "TCONS_00003676"; exon_number "1"; exon_id "TCONS_00003676.1";
Contig13492	Putative_elincRNA	exon	88228	88592	.	+	.	gene_id "TCONS_00003709"; transcript_id "TCONS_00003709"; exon_number "1"; exon_id "TCONS_00003709.1";
Contig13492	Putative_elincRNA	CDS	88228	88592	.	+	0	gene_id "TCONS_00003709"; transcript_id "TCONS_00003709"; exon_number "1"; exon_id "TCONS_00003709.1";
Contig13492	Putative_elincRNA	start_codon	88228	88230	.	+	0	gene_id "TCONS_00003709"; transcript_id "TCONS_00003709"; exon_number "1"; exon_id "TCONS_00003709.1";
Contig13496	Putative_elincRNA	exon	76178	76469	.	-	.	gene_id "TCONS_00003773"; transcript_id "TCONS_00003773"; exon_number "1"; exon_id "TCONS_00003773.1";
Contig13496	Putative_elincRNA	CDS	76178	76469	.	-	0	gene_id "TCONS_00003773"; transcript_id "TCONS_00003773"; exon_number "1"; exon_id "TCONS_00003773.1";
Contig13496	Putative_elincRNA	start_codon	76467	76469	.	-	0	gene_id "TCONS_00003773"; transcript_id "TCONS_00003773"; exon_number "1"; exon_id "TCONS_00003773.1";
Contig13496	Putative_elincRNA	exon	364521	364892	.	+	.	gene_id "TCONS_00003763"; transcript_id "TCONS_00003763"; exon_number "1"; exon_id "TCONS_00003763.1";
Contig13496	Putative_elincRNA	CDS	364521	364889	.	+	0	gene_id "TCONS_00003763"; transcript_id "TCONS_00003763"; exon_number "1"; exon_id "TCONS_00003763.1";
Contig13496	Putative_elincRNA	start_codon	364521	364523	.	+	0	gene_id "TCONS_00003763"; transcript_id "TCONS_00003763"; exon_number "1"; exon_id "TCONS_00003763.1";
Contig13496	Putative_elincRNA	stop_codon	364890	364892	.	+	0	gene_id "TCONS_00003763"; transcript_id "TCONS_00003763"; exon_number "1"; exon_id "TCONS_00003763.1";
Contig13496	Putative_elincRNA	exon	365738	366213	.	+	.	gene_id "TCONS_00003764"; transcript_id "TCONS_00003764"; exon_number "1"; exon_id "TCONS_00003764.1";
Contig13496	Putative_elincRNA	CDS	365738	366213	.	+	0	gene_id "TCONS_00003764"; transcript_id "TCONS_00003764"; exon_number "1"; exon_id "TCONS_00003764.1";
Contig13496	Putative_elincRNA	start_codon	365738	365740	.	+	0	gene_id "TCONS_00003764"; transcript_id "TCONS_00003764"; exon_number "1"; exon_id "TCONS_00003764.1";
Contig13498	Putative_elincRNA	exon	204410	204780	.	+	.	gene_id "TCONS_00003790"; transcript_id "TCONS_00003790"; exon_number "1"; exon_id "TCONS_00003790.1";
Contig13498	Putative_elincRNA	CDS	204410	204780	.	+	0	gene_id "TCONS_00003790"; transcript_id "TCONS_00003790"; exon_number "1"; exon_id "TCONS_00003790.1";
Contig13498	Putative_elincRNA	start_codon	204410	204412	.	+	0	gene_id "TCONS_00003790"; transcript_id "TCONS_00003790"; exon_number "1"; exon_id "TCONS_00003790.1";
Contig13498	Putative_elincRNA	exon	204605	204887	.	-	.	gene_id "TCONS_00003792"; transcript_id "TCONS_00003792"; exon_number "1"; exon_id "TCONS_00003792.1";
Contig13498	Putative_elincRNA	CDS	204605	204887	.	-	0	gene_id "TCONS_00003792"; transcript_id "TCONS_00003792"; exon_number "1"; exon_id "TCONS_00003792.1";
Contig13498	Putative_elincRNA	start_codon	204885	204887	.	-	0	gene_id "TCONS_00003792"; transcript_id "TCONS_00003792"; exon_number "1"; exon_id "TCONS_00003792.1";
Contig13498	Putative_elincRNA	exon	205225	205634	.	-	.	gene_id "TCONS_00003793"; transcript_id "TCONS_00003793"; exon_number "1"; exon_id "TCONS_00003793.1";
Contig13498	Putative_elincRNA	CDS	205225	205634	.	-	0	gene_id "TCONS_00003793"; transcript_id "TCONS_00003793"; exon_number "1"; exon_id "TCONS_00003793.1";
Contig13498	Putative_elincRNA	start_codon	205632	205634	.	-	0	gene_id "TCONS_00003793"; transcript_id "TCONS_00003793"; exon_number "1"; exon_id "TCONS_00003793.1";
Contig13500	Putative_elincRNA	exon	261348	261524	.	+	.	gene_id "TCONS_00003838"; transcript_id "TCONS_00003838"; exon_number "1"; exon_id "TCONS_00003838.1";
Contig13500	Putative_elincRNA	CDS	261348	261524	.	+	0	gene_id "TCONS_00003838"; transcript_id "TCONS_00003838"; exon_number "1"; exon_id "TCONS_00003838.1";
Contig13500	Putative_elincRNA	exon	261575	261812	.	+	.	gene_id "TCONS_00003838"; transcript_id "TCONS_00003838"; exon_number "2"; exon_id "TCONS_00003838.2";
Contig13500	Putative_elincRNA	CDS	261575	261812	.	+	0	gene_id "TCONS_00003838"; transcript_id "TCONS_00003838"; exon_number "2"; exon_id "TCONS_00003838.2";
Contig13500	Putative_elincRNA	start_codon	261348	261350	.	+	0	gene_id "TCONS_00003838"; transcript_id "TCONS_00003838"; exon_number "1"; exon_id "TCONS_00003838.1";
Contig13500	Putative_elincRNA	exon	261415	261743	.	-	.	gene_id "TCONS_00003858"; transcript_id "TCONS_00003858"; exon_number "1"; exon_id "TCONS_00003858.1";
Contig13500	Putative_elincRNA	CDS	261415	261743	.	-	0	gene_id "TCONS_00003858"; transcript_id "TCONS_00003858"; exon_number "1"; exon_id "TCONS_00003858.1";
Contig13500	Putative_elincRNA	start_codon	261741	261743	.	-	0	gene_id "TCONS_00003858"; transcript_id "TCONS_00003858"; exon_number "1"; exon_id "TCONS_00003858.1";
Contig13500	Putative_elincRNA	exon	262020	262574	.	+	.	gene_id "TCONS_00003839"; transcript_id "TCONS_00003839"; exon_number "1"; exon_id "TCONS_00003839.1";
Contig13500	Putative_elincRNA	CDS	262020	262571	.	+	0	gene_id "TCONS_00003839"; transcript_id "TCONS_00003839"; exon_number "1"; exon_id "TCONS_00003839.1";
Contig13500	Putative_elincRNA	start_codon	262020	262022	.	+	0	gene_id "TCONS_00003839"; transcript_id "TCONS_00003839"; exon_number "1"; exon_id "TCONS_00003839.1";
Contig13500	Putative_elincRNA	stop_codon	262572	262574	.	+	0	gene_id "TCONS_00003839"; transcript_id "TCONS_00003839"; exon_number "1"; exon_id "TCONS_00003839.1";
Contig13501	Putative_elincRNA	exon	325887	325937	.	-	.	gene_id "TCONS_00003891"; transcript_id "TCONS_00003891"; exon_number "1"; exon_id "TCONS_00003891.1";
Contig13501	Putative_elincRNA	CDS	325890	325937	.	-	0	gene_id "TCONS_00003891"; transcript_id "TCONS_00003891"; exon_number "1"; exon_id "TCONS_00003891.1";
Contig13501	Putative_elincRNA	start_codon	325935	325937	.	-	0	gene_id "TCONS_00003891"; transcript_id "TCONS_00003891"; exon_number "1"; exon_id "TCONS_00003891.1";
Contig13501	Putative_elincRNA	stop_codon	325887	325889	.	-	0	gene_id "TCONS_00003891"; transcript_id "TCONS_00003891"; exon_number "1"; exon_id "TCONS_00003891.1";
Contig13503	Putative_elincRNA	exon	16668	16742	.	+	.	gene_id "TCONS_00003906"; transcript_id "TCONS_00003906"; exon_number "1"; exon_id "TCONS_00003906.1";
Contig13503	Putative_elincRNA	CDS	16668	16739	.	+	0	gene_id "TCONS_00003906"; transcript_id "TCONS_00003906"; exon_number "1"; exon_id "TCONS_00003906.1";
Contig13503	Putative_elincRNA	start_codon	16668	16670	.	+	0	gene_id "TCONS_00003906"; transcript_id "TCONS_00003906"; exon_number "1"; exon_id "TCONS_00003906.1";
Contig13503	Putative_elincRNA	stop_codon	16740	16742	.	+	0	gene_id "TCONS_00003906"; transcript_id "TCONS_00003906"; exon_number "1"; exon_id "TCONS_00003906.1";
Contig13503	Putative_elincRNA	exon	16668	16998	.	-	.	gene_id "TCONS_00003921"; transcript_id "TCONS_00003921"; exon_number "1"; exon_id "TCONS_00003921.1";
Contig13503	Putative_elincRNA	CDS	16671	16998	.	-	1	gene_id "TCONS_00003921"; transcript_id "TCONS_00003921"; exon_number "1"; exon_id "TCONS_00003921.1";
Contig13503	Putative_elincRNA	exon	17989	18129	.	-	.	gene_id "TCONS_00003921"; transcript_id "TCONS_00003921"; exon_number "2"; exon_id "TCONS_00003921.2";
Contig13503	Putative_elincRNA	CDS	17989	18129	.	-	1	gene_id "TCONS_00003921"; transcript_id "TCONS_00003921"; exon_number "2"; exon_id "TCONS_00003921.2";
Contig13503	Putative_elincRNA	exon	18257	18426	.	-	.	gene_id "TCONS_00003921"; transcript_id "TCONS_00003921"; exon_number "3"; exon_id "TCONS_00003921.3";
Contig13503	Putative_elincRNA	CDS	18257	18426	.	-	0	gene_id "TCONS_00003921"; transcript_id "TCONS_00003921"; exon_number "3"; exon_id "TCONS_00003921.3";
Contig13503	Putative_elincRNA	start_codon	18424	18426	.	-	0	gene_id "TCONS_00003921"; transcript_id "TCONS_00003921"; exon_number "1"; exon_id "TCONS_00003921.1";
Contig13503	Putative_elincRNA	stop_codon	16668	16670	.	-	0	gene_id "TCONS_00003921"; transcript_id "TCONS_00003921"; exon_number "1"; exon_id "TCONS_00003921.1";
Contig13506	Putative_elincRNA	exon	578127	578777	.	-	.	gene_id "TCONS_00004005"; transcript_id "TCONS_00004005"; exon_number "1"; exon_id "TCONS_00004005.1";
Contig13506	Putative_elincRNA	CDS	578130	578777	.	-	0	gene_id "TCONS_00004005"; transcript_id "TCONS_00004005"; exon_number "1"; exon_id "TCONS_00004005.1";
Contig13506	Putative_elincRNA	start_codon	578775	578777	.	-	0	gene_id "TCONS_00004005"; transcript_id "TCONS_00004005"; exon_number "1"; exon_id "TCONS_00004005.1";
Contig13506	Putative_elincRNA	stop_codon	578127	578129	.	-	0	gene_id "TCONS_00004005"; transcript_id "TCONS_00004005"; exon_number "1"; exon_id "TCONS_00004005.1";
Contig13506	Putative_elincRNA	exon	579336	580037	.	-	.	gene_id "TCONS_00004006"; transcript_id "TCONS_00004006"; exon_number "1"; exon_id "TCONS_00004006.1";
Contig13506	Putative_elincRNA	CDS	579339	580037	.	-	0	gene_id "TCONS_00004006"; transcript_id "TCONS_00004006"; exon_number "1"; exon_id "TCONS_00004006.1";
Contig13506	Putative_elincRNA	start_codon	580035	580037	.	-	0	gene_id "TCONS_00004006"; transcript_id "TCONS_00004006"; exon_number "1"; exon_id "TCONS_00004006.1";
Contig13506	Putative_elincRNA	stop_codon	579336	579338	.	-	0	gene_id "TCONS_00004006"; transcript_id "TCONS_00004006"; exon_number "1"; exon_id "TCONS_00004006.1";
Contig13508	Putative_elincRNA	exon	572705	572874	.	+	.	gene_id "TCONS_00004081"; transcript_id "TCONS_00004081"; exon_number "1"; exon_id "TCONS_00004081.1";
Contig13508	Putative_elincRNA	CDS	572705	572874	.	+	0	gene_id "TCONS_00004081"; transcript_id "TCONS_00004081"; exon_number "1"; exon_id "TCONS_00004081.1";
Contig13508	Putative_elincRNA	exon	572922	573055	.	+	.	gene_id "TCONS_00004081"; transcript_id "TCONS_00004081"; exon_number "2"; exon_id "TCONS_00004081.2";
Contig13508	Putative_elincRNA	CDS	572922	573055	.	+	1	gene_id "TCONS_00004081"; transcript_id "TCONS_00004081"; exon_number "2"; exon_id "TCONS_00004081.2";
Contig13508	Putative_elincRNA	start_codon	572705	572707	.	+	0	gene_id "TCONS_00004081"; transcript_id "TCONS_00004081"; exon_number "1"; exon_id "TCONS_00004081.1";
Contig13509	Putative_elincRNA	exon	611161	611548	.	+	.	gene_id "TCONS_00004129"; transcript_id "TCONS_00004129"; exon_number "1"; exon_id "TCONS_00004129.1";
Contig13509	Putative_elincRNA	CDS	611161	611548	.	+	0	gene_id "TCONS_00004129"; transcript_id "TCONS_00004129"; exon_number "1"; exon_id "TCONS_00004129.1";
Contig13509	Putative_elincRNA	start_codon	611161	611163	.	+	0	gene_id "TCONS_00004129"; transcript_id "TCONS_00004129"; exon_number "1"; exon_id "TCONS_00004129.1";
Contig13513	Putative_elincRNA	exon	764503	764555	.	-	.	gene_id "TCONS_00004318"; transcript_id "TCONS_00004318"; exon_number "1"; exon_id "TCONS_00004318.1";
Contig13513	Putative_elincRNA	CDS	764503	764555	.	-	0	gene_id "TCONS_00004318"; transcript_id "TCONS_00004318"; exon_number "1"; exon_id "TCONS_00004318.1";
Contig13513	Putative_elincRNA	start_codon	764553	764555	.	-	0	gene_id "TCONS_00004318"; transcript_id "TCONS_00004318"; exon_number "1"; exon_id "TCONS_00004318.1";
Contig13514	Putative_elincRNA	exon	796894	797294	.	-	.	gene_id "TCONS_00004362"; transcript_id "TCONS_00004362"; exon_number "1"; exon_id "TCONS_00004362.1";
Contig13514	Putative_elincRNA	CDS	796894	797294	.	-	0	gene_id "TCONS_00004362"; transcript_id "TCONS_00004362"; exon_number "1"; exon_id "TCONS_00004362.1";
Contig13514	Putative_elincRNA	exon	797490	797576	.	-	.	gene_id "TCONS_00004362"; transcript_id "TCONS_00004362"; exon_number "2"; exon_id "TCONS_00004362.2";
Contig13514	Putative_elincRNA	CDS	797490	797576	.	-	0	gene_id "TCONS_00004362"; transcript_id "TCONS_00004362"; exon_number "2"; exon_id "TCONS_00004362.2";
Contig13514	Putative_elincRNA	start_codon	797574	797576	.	-	0	gene_id "TCONS_00004362"; transcript_id "TCONS_00004362"; exon_number "1"; exon_id "TCONS_00004362.1";
Contig13516	Putative_elincRNA	exon	70681	71318	.	-	.	gene_id "TCONS_00004419"; transcript_id "TCONS_00004419"; exon_number "1"; exon_id "TCONS_00004419.1";
Contig13516	Putative_elincRNA	CDS	70681	71318	.	-	1	gene_id "TCONS_00004419"; transcript_id "TCONS_00004419"; exon_number "1"; exon_id "TCONS_00004419.1";
Contig13516	Putative_elincRNA	exon	71381	71562	.	-	.	gene_id "TCONS_00004419"; transcript_id "TCONS_00004419"; exon_number "2"; exon_id "TCONS_00004419.2";
Contig13516	Putative_elincRNA	CDS	71381	71562	.	-	0	gene_id "TCONS_00004419"; transcript_id "TCONS_00004419"; exon_number "2"; exon_id "TCONS_00004419.2";
Contig13516	Putative_elincRNA	start_codon	71560	71562	.	-	0	gene_id "TCONS_00004419"; transcript_id "TCONS_00004419"; exon_number "1"; exon_id "TCONS_00004419.1";
Contig13516	Putative_elincRNA	exon	302192	302503	.	-	.	gene_id "TCONS_00004425"; transcript_id "TCONS_00004425"; exon_number "1"; exon_id "TCONS_00004425.1";
Contig13516	Putative_elincRNA	CDS	302195	302503	.	-	0	gene_id "TCONS_00004425"; transcript_id "TCONS_00004425"; exon_number "1"; exon_id "TCONS_00004425.1";
Contig13516	Putative_elincRNA	start_codon	302501	302503	.	-	0	gene_id "TCONS_00004425"; transcript_id "TCONS_00004425"; exon_number "1"; exon_id "TCONS_00004425.1";
Contig13516	Putative_elincRNA	stop_codon	302192	302194	.	-	0	gene_id "TCONS_00004425"; transcript_id "TCONS_00004425"; exon_number "1"; exon_id "TCONS_00004425.1";
Contig13518	Putative_elincRNA	exon	218790	218855	.	+	.	gene_id "TCONS_00004448"; transcript_id "TCONS_00004448"; exon_number "1"; exon_id "TCONS_00004448.1";
Contig13518	Putative_elincRNA	CDS	218790	218855	.	+	0	gene_id "TCONS_00004448"; transcript_id "TCONS_00004448"; exon_number "1"; exon_id "TCONS_00004448.1";
Contig13518	Putative_elincRNA	exon	218909	218934	.	+	.	gene_id "TCONS_00004448"; transcript_id "TCONS_00004448"; exon_number "2"; exon_id "TCONS_00004448.2";
Contig13518	Putative_elincRNA	CDS	218909	218934	.	+	0	gene_id "TCONS_00004448"; transcript_id "TCONS_00004448"; exon_number "2"; exon_id "TCONS_00004448.2";
Contig13518	Putative_elincRNA	exon	218945	219014	.	+	.	gene_id "TCONS_00004448"; transcript_id "TCONS_00004448"; exon_number "3"; exon_id "TCONS_00004448.3";
Contig13518	Putative_elincRNA	CDS	218945	219014	.	+	1	gene_id "TCONS_00004448"; transcript_id "TCONS_00004448"; exon_number "3"; exon_id "TCONS_00004448.3";
Contig13518	Putative_elincRNA	exon	220035	220145	.	+	.	gene_id "TCONS_00004448"; transcript_id "TCONS_00004448"; exon_number "4"; exon_id "TCONS_00004448.4";
Contig13518	Putative_elincRNA	CDS	220035	220145	.	+	0	gene_id "TCONS_00004448"; transcript_id "TCONS_00004448"; exon_number "4"; exon_id "TCONS_00004448.4";
Contig13518	Putative_elincRNA	exon	220187	220253	.	+	.	gene_id "TCONS_00004448"; transcript_id "TCONS_00004448"; exon_number "5"; exon_id "TCONS_00004448.5";
Contig13518	Putative_elincRNA	CDS	220187	220253	.	+	0	gene_id "TCONS_00004448"; transcript_id "TCONS_00004448"; exon_number "5"; exon_id "TCONS_00004448.5";
Contig13518	Putative_elincRNA	exon	220302	220501	.	+	.	gene_id "TCONS_00004448"; transcript_id "TCONS_00004448"; exon_number "6"; exon_id "TCONS_00004448.6";
Contig13518	Putative_elincRNA	CDS	220302	220498	.	+	2	gene_id "TCONS_00004448"; transcript_id "TCONS_00004448"; exon_number "6"; exon_id "TCONS_00004448.6";
Contig13518	Putative_elincRNA	start_codon	218790	218792	.	+	0	gene_id "TCONS_00004448"; transcript_id "TCONS_00004448"; exon_number "1"; exon_id "TCONS_00004448.1";
Contig13518	Putative_elincRNA	stop_codon	220499	220501	.	+	0	gene_id "TCONS_00004448"; transcript_id "TCONS_00004448"; exon_number "1"; exon_id "TCONS_00004448.1";
Contig13518	Putative_elincRNA	exon	281179	281484	.	-	.	gene_id "TCONS_00004467"; transcript_id "TCONS_00004467"; exon_number "1"; exon_id "TCONS_00004467.1";
Contig13518	Putative_elincRNA	CDS	281182	281484	.	-	0	gene_id "TCONS_00004467"; transcript_id "TCONS_00004467"; exon_number "1"; exon_id "TCONS_00004467.1";
Contig13518	Putative_elincRNA	start_codon	281482	281484	.	-	0	gene_id "TCONS_00004467"; transcript_id "TCONS_00004467"; exon_number "1"; exon_id "TCONS_00004467.1";
Contig13518	Putative_elincRNA	stop_codon	281179	281181	.	-	0	gene_id "TCONS_00004467"; transcript_id "TCONS_00004467"; exon_number "1"; exon_id "TCONS_00004467.1";
Contig13521	Putative_elincRNA	exon	261564	261769	.	+	.	gene_id "TCONS_00004610"; transcript_id "TCONS_00004610"; exon_number "1"; exon_id "TCONS_00004610.1";
Contig13521	Putative_elincRNA	CDS	261564	261769	.	+	0	gene_id "TCONS_00004610"; transcript_id "TCONS_00004610"; exon_number "1"; exon_id "TCONS_00004610.1";
Contig13521	Putative_elincRNA	start_codon	261564	261566	.	+	0	gene_id "TCONS_00004610"; transcript_id "TCONS_00004610"; exon_number "1"; exon_id "TCONS_00004610.1";
Contig13521	Putative_elincRNA	exon	1242177	1242331	.	-	.	gene_id "TCONS_00004675"; transcript_id "TCONS_00004675"; exon_number "1"; exon_id "TCONS_00004675.1";
Contig13521	Putative_elincRNA	CDS	1242177	1242331	.	-	0	gene_id "TCONS_00004675"; transcript_id "TCONS_00004675"; exon_number "1"; exon_id "TCONS_00004675.1";
Contig13521	Putative_elincRNA	start_codon	1242329	1242331	.	-	0	gene_id "TCONS_00004675"; transcript_id "TCONS_00004675"; exon_number "1"; exon_id "TCONS_00004675.1";
Contig13522	Putative_elincRNA	exon	104296	104392	.	+	.	gene_id "TCONS_00004684"; transcript_id "TCONS_00004684"; exon_number "1"; exon_id "TCONS_00004684.1";
Contig13522	Putative_elincRNA	CDS	104296	104392	.	+	0	gene_id "TCONS_00004684"; transcript_id "TCONS_00004684"; exon_number "1"; exon_id "TCONS_00004684.1";
Contig13522	Putative_elincRNA	exon	109035	109140	.	+	.	gene_id "TCONS_00004684"; transcript_id "TCONS_00004684"; exon_number "2"; exon_id "TCONS_00004684.2";
Contig13522	Putative_elincRNA	CDS	109035	109140	.	+	2	gene_id "TCONS_00004684"; transcript_id "TCONS_00004684"; exon_number "2"; exon_id "TCONS_00004684.2";
Contig13522	Putative_elincRNA	exon	109486	109633	.	+	.	gene_id "TCONS_00004684"; transcript_id "TCONS_00004684"; exon_number "3"; exon_id "TCONS_00004684.3";
Contig13522	Putative_elincRNA	CDS	109486	109630	.	+	1	gene_id "TCONS_00004684"; transcript_id "TCONS_00004684"; exon_number "3"; exon_id "TCONS_00004684.3";
Contig13522	Putative_elincRNA	start_codon	104296	104298	.	+	0	gene_id "TCONS_00004684"; transcript_id "TCONS_00004684"; exon_number "1"; exon_id "TCONS_00004684.1";
Contig13522	Putative_elincRNA	stop_codon	109631	109633	.	+	0	gene_id "TCONS_00004684"; transcript_id "TCONS_00004684"; exon_number "1"; exon_id "TCONS_00004684.1";
Contig13522	Putative_elincRNA	exon	571637	572019	.	+	.	gene_id "TCONS_00004701"; transcript_id "TCONS_00004701"; exon_number "1"; exon_id "TCONS_00004701.1";
Contig13522	Putative_elincRNA	CDS	571637	572019	.	+	0	gene_id "TCONS_00004701"; transcript_id "TCONS_00004701"; exon_number "1"; exon_id "TCONS_00004701.1";
Contig13522	Putative_elincRNA	start_codon	571637	571639	.	+	0	gene_id "TCONS_00004701"; transcript_id "TCONS_00004701"; exon_number "1"; exon_id "TCONS_00004701.1";
Contig13108	Putative_plincRNA	exon	9545	9722	.	+	.	gene_id "TCONS_00001029"; transcript_id "TCONS_00001029"; exon_number "1"; exon_id "TCONS_00001029.1";
Contig13108	Putative_plincRNA	CDS	9545	9722	.	+	0	gene_id "TCONS_00001029"; transcript_id "TCONS_00001029"; exon_number "1"; exon_id "TCONS_00001029.1";
Contig13108	Putative_plincRNA	exon	9773	9959	.	+	.	gene_id "TCONS_00001029"; transcript_id "TCONS_00001029"; exon_number "2"; exon_id "TCONS_00001029.2";
Contig13108	Putative_plincRNA	CDS	9773	9959	.	+	2	gene_id "TCONS_00001029"; transcript_id "TCONS_00001029"; exon_number "2"; exon_id "TCONS_00001029.2";
Contig13108	Putative_plincRNA	exon	9966	10070	.	+	.	gene_id "TCONS_00001029"; transcript_id "TCONS_00001029"; exon_number "3"; exon_id "TCONS_00001029.3";
Contig13108	Putative_plincRNA	CDS	9966	10070	.	+	1	gene_id "TCONS_00001029"; transcript_id "TCONS_00001029"; exon_number "3"; exon_id "TCONS_00001029.3";
Contig13108	Putative_plincRNA	start_codon	9545	9547	.	+	0	gene_id "TCONS_00001029"; transcript_id "TCONS_00001029"; exon_number "1"; exon_id "TCONS_00001029.1";
Contig13108	Putative_plincRNA	exon	9641	9722	.	-	.	gene_id "TCONS_00001033"; transcript_id "TCONS_00001033"; exon_number "1"; exon_id "TCONS_00001033.1";
Contig13108	Putative_plincRNA	CDS	9641	9722	.	-	0	gene_id "TCONS_00001033"; transcript_id "TCONS_00001033"; exon_number "1"; exon_id "TCONS_00001033.1";
Contig13108	Putative_plincRNA	exon	9773	9991	.	-	.	gene_id "TCONS_00001033"; transcript_id "TCONS_00001033"; exon_number "2"; exon_id "TCONS_00001033.2";
Contig13108	Putative_plincRNA	CDS	9773	9991	.	-	0	gene_id "TCONS_00001033"; transcript_id "TCONS_00001033"; exon_number "2"; exon_id "TCONS_00001033.2";
Contig13108	Putative_plincRNA	start_codon	9989	9991	.	-	0	gene_id "TCONS_00001033"; transcript_id "TCONS_00001033"; exon_number "1"; exon_id "TCONS_00001033.1";
Contig13108	Putative_plincRNA	exon	11909	12392	.	+	.	gene_id "TCONS_00001030"; transcript_id "TCONS_00001030"; exon_number "1"; exon_id "TCONS_00001030.1";
Contig13108	Putative_plincRNA	CDS	11909	12392	.	+	0	gene_id "TCONS_00001030"; transcript_id "TCONS_00001030"; exon_number "1"; exon_id "TCONS_00001030.1";
Contig13108	Putative_plincRNA	start_codon	11909	11911	.	+	0	gene_id "TCONS_00001030"; transcript_id "TCONS_00001030"; exon_number "1"; exon_id "TCONS_00001030.1";
Contig13131	Putative_plincRNA	exon	64034	64318	.	+	.	gene_id "TCONS_00001083"; transcript_id "TCONS_00001083"; exon_number "1"; exon_id "TCONS_00001083.1";
Contig13131	Putative_plincRNA	CDS	64034	64318	.	+	0	gene_id "TCONS_00001083"; transcript_id "TCONS_00001083"; exon_number "1"; exon_id "TCONS_00001083.1";
Contig13131	Putative_plincRNA	exon	65450	65503	.	+	.	gene_id "TCONS_00001083"; transcript_id "TCONS_00001083"; exon_number "2"; exon_id "TCONS_00001083.2";
Contig13131	Putative_plincRNA	CDS	65450	65500	.	+	0	gene_id "TCONS_00001083"; transcript_id "TCONS_00001083"; exon_number "2"; exon_id "TCONS_00001083.2";
Contig13131	Putative_plincRNA	start_codon	64034	64036	.	+	0	gene_id "TCONS_00001083"; transcript_id "TCONS_00001083"; exon_number "1"; exon_id "TCONS_00001083.1";
Contig13131	Putative_plincRNA	stop_codon	65501	65503	.	+	0	gene_id "TCONS_00001083"; transcript_id "TCONS_00001083"; exon_number "1"; exon_id "TCONS_00001083.1";
Contig13276	Putative_plincRNA	exon	31792	32168	.	-	.	gene_id "TCONS_00001622"; transcript_id "TCONS_00001622"; exon_number "1"; exon_id "TCONS_00001622.1";
Contig13276	Putative_plincRNA	CDS	31792	32168	.	-	0	gene_id "TCONS_00001622"; transcript_id "TCONS_00001622"; exon_number "1"; exon_id "TCONS_00001622.1";
Contig13276	Putative_plincRNA	start_codon	32166	32168	.	-	0	gene_id "TCONS_00001622"; transcript_id "TCONS_00001622"; exon_number "1"; exon_id "TCONS_00001622.1";
Contig13316	Putative_plincRNA	exon	60984	61263	.	+	.	gene_id "TCONS_00001886"; transcript_id "TCONS_00001886"; exon_number "1"; exon_id "TCONS_00001886.1";
Contig13316	Putative_plincRNA	CDS	60984	61263	.	+	0	gene_id "TCONS_00001886"; transcript_id "TCONS_00001886"; exon_number "1"; exon_id "TCONS_00001886.1";
Contig13316	Putative_plincRNA	exon	61534	61726	.	+	.	gene_id "TCONS_00001886"; transcript_id "TCONS_00001886"; exon_number "2"; exon_id "TCONS_00001886.2";
Contig13316	Putative_plincRNA	CDS	61534	61726	.	+	2	gene_id "TCONS_00001886"; transcript_id "TCONS_00001886"; exon_number "2"; exon_id "TCONS_00001886.2";
Contig13316	Putative_plincRNA	start_codon	60984	60986	.	+	0	gene_id "TCONS_00001886"; transcript_id "TCONS_00001886"; exon_number "1"; exon_id "TCONS_00001886.1";
Contig13355	Putative_plincRNA	exon	156344	156753	.	-	.	gene_id "TCONS_00002185"; transcript_id "TCONS_00002185"; exon_number "1"; exon_id "TCONS_00002185.1";
Contig13355	Putative_plincRNA	CDS	156344	156753	.	-	0	gene_id "TCONS_00002185"; transcript_id "TCONS_00002185"; exon_number "1"; exon_id "TCONS_00002185.1";
Contig13355	Putative_plincRNA	start_codon	156751	156753	.	-	0	gene_id "TCONS_00002185"; transcript_id "TCONS_00002185"; exon_number "1"; exon_id "TCONS_00002185.1";
Contig13372	Putative_plincRNA	exon	117959	118289	.	-	.	gene_id "TCONS_00002269"; transcript_id "TCONS_00002269"; exon_number "1"; exon_id "TCONS_00002269.1";
Contig13372	Putative_plincRNA	CDS	117959	118289	.	-	0	gene_id "TCONS_00002269"; transcript_id "TCONS_00002269"; exon_number "1"; exon_id "TCONS_00002269.1";
Contig13372	Putative_plincRNA	start_codon	118287	118289	.	-	0	gene_id "TCONS_00002269"; transcript_id "TCONS_00002269"; exon_number "1"; exon_id "TCONS_00002269.1";
Contig13409	Putative_plincRNA	exon	60535	60863	.	-	.	gene_id "TCONS_00002586"; transcript_id "TCONS_00002586"; exon_number "1"; exon_id "TCONS_00002586.1";
Contig13409	Putative_plincRNA	CDS	60535	60863	.	-	0	gene_id "TCONS_00002586"; transcript_id "TCONS_00002586"; exon_number "1"; exon_id "TCONS_00002586.1";
Contig13409	Putative_plincRNA	exon	60917	61153	.	-	.	gene_id "TCONS_00002586"; transcript_id "TCONS_00002586"; exon_number "2"; exon_id "TCONS_00002586.2";
Contig13409	Putative_plincRNA	CDS	60917	61153	.	-	0	gene_id "TCONS_00002586"; transcript_id "TCONS_00002586"; exon_number "2"; exon_id "TCONS_00002586.2";
Contig13409	Putative_plincRNA	start_codon	61151	61153	.	-	0	gene_id "TCONS_00002586"; transcript_id "TCONS_00002586"; exon_number "1"; exon_id "TCONS_00002586.1";
Contig13409	Putative_plincRNA	exon	135263	135688	.	+	.	gene_id "TCONS_00002578"; transcript_id "TCONS_00002578"; exon_number "1"; exon_id "TCONS_00002578.1";
Contig13409	Putative_plincRNA	CDS	135263	135685	.	+	0	gene_id "TCONS_00002578"; transcript_id "TCONS_00002578"; exon_number "1"; exon_id "TCONS_00002578.1";
Contig13409	Putative_plincRNA	start_codon	135263	135265	.	+	0	gene_id "TCONS_00002578"; transcript_id "TCONS_00002578"; exon_number "1"; exon_id "TCONS_00002578.1";
Contig13409	Putative_plincRNA	stop_codon	135686	135688	.	+	0	gene_id "TCONS_00002578"; transcript_id "TCONS_00002578"; exon_number "1"; exon_id "TCONS_00002578.1";
Contig13414	Putative_plincRNA	exon	91080	91492	.	-	.	gene_id "TCONS_00002622"; transcript_id "TCONS_00002622"; exon_number "1"; exon_id "TCONS_00002622.1";
Contig13414	Putative_plincRNA	CDS	91080	91492	.	-	0	gene_id "TCONS_00002622"; transcript_id "TCONS_00002622"; exon_number "1"; exon_id "TCONS_00002622.1";
Contig13414	Putative_plincRNA	start_codon	91490	91492	.	-	0	gene_id "TCONS_00002622"; transcript_id "TCONS_00002622"; exon_number "1"; exon_id "TCONS_00002622.1";
Contig13447	Putative_plincRNA	exon	173050	173159	.	-	.	gene_id "TCONS_00002976"; transcript_id "TCONS_00002976"; exon_number "1"; exon_id "TCONS_00002976.1";
Contig13447	Putative_plincRNA	CDS	173050	173159	.	-	1	gene_id "TCONS_00002976"; transcript_id "TCONS_00002976"; exon_number "1"; exon_id "TCONS_00002976.1";
Contig13447	Putative_plincRNA	exon	173185	173468	.	-	.	gene_id "TCONS_00002976"; transcript_id "TCONS_00002976"; exon_number "2"; exon_id "TCONS_00002976.2";
Contig13447	Putative_plincRNA	CDS	173185	173468	.	-	0	gene_id "TCONS_00002976"; transcript_id "TCONS_00002976"; exon_number "2"; exon_id "TCONS_00002976.2";
Contig13447	Putative_plincRNA	exon	173840	174157	.	-	.	gene_id "TCONS_00002976"; transcript_id "TCONS_00002976"; exon_number "3"; exon_id "TCONS_00002976.3";
Contig13447	Putative_plincRNA	CDS	173840	174157	.	-	0	gene_id "TCONS_00002976"; transcript_id "TCONS_00002976"; exon_number "3"; exon_id "TCONS_00002976.3";
Contig13447	Putative_plincRNA	start_codon	174155	174157	.	-	0	gene_id "TCONS_00002976"; transcript_id "TCONS_00002976"; exon_number "1"; exon_id "TCONS_00002976.1";
Contig13471	Putative_plincRNA	exon	72661	72807	.	-	.	gene_id "TCONS_00003309"; transcript_id "TCONS_00003309"; exon_number "1"; exon_id "TCONS_00003309.1";
Contig13471	Putative_plincRNA	CDS	72664	72807	.	-	0	gene_id "TCONS_00003309"; transcript_id "TCONS_00003309"; exon_number "1"; exon_id "TCONS_00003309.1";
Contig13471	Putative_plincRNA	exon	73132	73218	.	-	.	gene_id "TCONS_00003309"; transcript_id "TCONS_00003309"; exon_number "2"; exon_id "TCONS_00003309.2";
Contig13471	Putative_plincRNA	CDS	73132	73218	.	-	0	gene_id "TCONS_00003309"; transcript_id "TCONS_00003309"; exon_number "2"; exon_id "TCONS_00003309.2";
Contig13471	Putative_plincRNA	exon	73275	73333	.	-	.	gene_id "TCONS_00003309"; transcript_id "TCONS_00003309"; exon_number "3"; exon_id "TCONS_00003309.3";
Contig13471	Putative_plincRNA	CDS	73275	73333	.	-	2	gene_id "TCONS_00003309"; transcript_id "TCONS_00003309"; exon_number "3"; exon_id "TCONS_00003309.3";
Contig13471	Putative_plincRNA	exon	73441	73498	.	-	.	gene_id "TCONS_00003309"; transcript_id "TCONS_00003309"; exon_number "4"; exon_id "TCONS_00003309.4";
Contig13471	Putative_plincRNA	CDS	73441	73498	.	-	0	gene_id "TCONS_00003309"; transcript_id "TCONS_00003309"; exon_number "4"; exon_id "TCONS_00003309.4";
Contig13471	Putative_plincRNA	start_codon	73496	73498	.	-	0	gene_id "TCONS_00003309"; transcript_id "TCONS_00003309"; exon_number "1"; exon_id "TCONS_00003309.1";
Contig13471	Putative_plincRNA	stop_codon	72661	72663	.	-	0	gene_id "TCONS_00003309"; transcript_id "TCONS_00003309"; exon_number "1"; exon_id "TCONS_00003309.1";
Contig13484	Putative_plincRNA	exon	422338	422726	.	-	.	gene_id "TCONS_00003542"; transcript_id "TCONS_00003542"; exon_number "1"; exon_id "TCONS_00003542.1";
Contig13484	Putative_plincRNA	CDS	422338	422726	.	-	0	gene_id "TCONS_00003542"; transcript_id "TCONS_00003542"; exon_number "1"; exon_id "TCONS_00003542.1";
Contig13484	Putative_plincRNA	start_codon	422724	422726	.	-	0	gene_id "TCONS_00003542"; transcript_id "TCONS_00003542"; exon_number "1"; exon_id "TCONS_00003542.1";
Contig13495	Putative_plincRNA	exon	146026	146503	.	+	.	gene_id "TCONS_00003735"; transcript_id "TCONS_00003735"; exon_number "1"; exon_id "TCONS_00003735.1";
Contig13495	Putative_plincRNA	CDS	146026	146503	.	+	0	gene_id "TCONS_00003735"; transcript_id "TCONS_00003735"; exon_number "1"; exon_id "TCONS_00003735.1";
Contig13495	Putative_plincRNA	start_codon	146026	146028	.	+	0	gene_id "TCONS_00003735"; transcript_id "TCONS_00003735"; exon_number "1"; exon_id "TCONS_00003735.1";
Contig13507	Putative_plincRNA	exon	276160	276382	.	-	.	gene_id "TCONS_00004043"; transcript_id "TCONS_00004043"; exon_number "1"; exon_id "TCONS_00004043.1";
Contig13507	Putative_plincRNA	CDS	276160	276382	.	-	0	gene_id "TCONS_00004043"; transcript_id "TCONS_00004043"; exon_number "1"; exon_id "TCONS_00004043.1";
Contig13507	Putative_plincRNA	exon	276389	276540	.	-	.	gene_id "TCONS_00004043"; transcript_id "TCONS_00004043"; exon_number "2"; exon_id "TCONS_00004043.2";
Contig13507	Putative_plincRNA	CDS	276389	276540	.	-	2	gene_id "TCONS_00004043"; transcript_id "TCONS_00004043"; exon_number "2"; exon_id "TCONS_00004043.2";
Contig13507	Putative_plincRNA	exon	276574	276587	.	-	.	gene_id "TCONS_00004043"; transcript_id "TCONS_00004043"; exon_number "3"; exon_id "TCONS_00004043.3";
Contig13507	Putative_plincRNA	CDS	276574	276587	.	-	1	gene_id "TCONS_00004043"; transcript_id "TCONS_00004043"; exon_number "3"; exon_id "TCONS_00004043.3";
Contig13507	Putative_plincRNA	exon	276612	277087	.	-	.	gene_id "TCONS_00004043"; transcript_id "TCONS_00004043"; exon_number "4"; exon_id "TCONS_00004043.4";
Contig13507	Putative_plincRNA	CDS	276612	277087	.	-	0	gene_id "TCONS_00004043"; transcript_id "TCONS_00004043"; exon_number "4"; exon_id "TCONS_00004043.4";
Contig13507	Putative_plincRNA	start_codon	277085	277087	.	-	0	gene_id "TCONS_00004043"; transcript_id "TCONS_00004043"; exon_number "1"; exon_id "TCONS_00004043.1";
Contig13507	Putative_plincRNA	exon	277277	278045	.	-	.	gene_id "TCONS_00004044"; transcript_id "TCONS_00004044"; exon_number "1"; exon_id "TCONS_00004044.1";
Contig13507	Putative_plincRNA	CDS	277277	278045	.	-	0	gene_id "TCONS_00004044"; transcript_id "TCONS_00004044"; exon_number "1"; exon_id "TCONS_00004044.1";
Contig13507	Putative_plincRNA	exon	278098	278139	.	-	.	gene_id "TCONS_00004044"; transcript_id "TCONS_00004044"; exon_number "2"; exon_id "TCONS_00004044.2";
Contig13507	Putative_plincRNA	CDS	278098	278139	.	-	0	gene_id "TCONS_00004044"; transcript_id "TCONS_00004044"; exon_number "2"; exon_id "TCONS_00004044.2";
Contig13507	Putative_plincRNA	start_codon	278137	278139	.	-	0	gene_id "TCONS_00004044"; transcript_id "TCONS_00004044"; exon_number "1"; exon_id "TCONS_00004044.1";
Contig13507	Putative_plincRNA	exon	277299	278045	.	+	.	gene_id "TCONS_00004017"; transcript_id "TCONS_00004017"; exon_number "1"; exon_id "TCONS_00004017.1";
Contig13507	Putative_plincRNA	CDS	277299	278045	.	+	0	gene_id "TCONS_00004017"; transcript_id "TCONS_00004017"; exon_number "1"; exon_id "TCONS_00004017.1";
Contig13507	Putative_plincRNA	exon	278098	278139	.	+	.	gene_id "TCONS_00004017"; transcript_id "TCONS_00004017"; exon_number "2"; exon_id "TCONS_00004017.2";
Contig13507	Putative_plincRNA	CDS	278098	278136	.	+	0	gene_id "TCONS_00004017"; transcript_id "TCONS_00004017"; exon_number "2"; exon_id "TCONS_00004017.2";
Contig13507	Putative_plincRNA	start_codon	277299	277301	.	+	0	gene_id "TCONS_00004017"; transcript_id "TCONS_00004017"; exon_number "1"; exon_id "TCONS_00004017.1";
Contig13507	Putative_plincRNA	stop_codon	278137	278139	.	+	0	gene_id "TCONS_00004017"; transcript_id "TCONS_00004017"; exon_number "1"; exon_id "TCONS_00004017.1";
Contig13514	Putative_plincRNA	exon	242983	243011	.	-	.	gene_id "TCONS_00004340"; transcript_id "TCONS_00004340"; exon_number "1"; exon_id "TCONS_00004340.1";
Contig13514	Putative_plincRNA	CDS	242983	243011	.	-	0	gene_id "TCONS_00004340"; transcript_id "TCONS_00004340"; exon_number "1"; exon_id "TCONS_00004340.1";
Contig13514	Putative_plincRNA	exon	244109	244396	.	-	.	gene_id "TCONS_00004340"; transcript_id "TCONS_00004340"; exon_number "2"; exon_id "TCONS_00004340.2";
Contig13514	Putative_plincRNA	CDS	244109	244396	.	-	0	gene_id "TCONS_00004340"; transcript_id "TCONS_00004340"; exon_number "2"; exon_id "TCONS_00004340.2";
Contig13514	Putative_plincRNA	start_codon	244394	244396	.	-	0	gene_id "TCONS_00004340"; transcript_id "TCONS_00004340"; exon_number "1"; exon_id "TCONS_00004340.1";
Contig13514	Putative_plincRNA	exon	243558	244118	.	-	.	gene_id "TCONS_00004341"; transcript_id "TCONS_00004341"; exon_number "1"; exon_id "TCONS_00004341.1";
Contig13514	Putative_plincRNA	CDS	243561	244118	.	-	0	gene_id "TCONS_00004341"; transcript_id "TCONS_00004341"; exon_number "1"; exon_id "TCONS_00004341.1";
Contig13514	Putative_plincRNA	start_codon	244116	244118	.	-	0	gene_id "TCONS_00004341"; transcript_id "TCONS_00004341"; exon_number "1"; exon_id "TCONS_00004341.1";
Contig13514	Putative_plincRNA	stop_codon	243558	243560	.	-	0	gene_id "TCONS_00004341"; transcript_id "TCONS_00004341"; exon_number "1"; exon_id "TCONS_00004341.1";
Contig13514	Putative_plincRNA	exon	243779	244081	.	+	.	gene_id "TCONS_00004323"; transcript_id "TCONS_00004323"; exon_number "1"; exon_id "TCONS_00004323.1";
Contig13514	Putative_plincRNA	CDS	243779	244078	.	+	0	gene_id "TCONS_00004323"; transcript_id "TCONS_00004323"; exon_number "1"; exon_id "TCONS_00004323.1";
Contig13514	Putative_plincRNA	start_codon	243779	243781	.	+	0	gene_id "TCONS_00004323"; transcript_id "TCONS_00004323"; exon_number "1"; exon_id "TCONS_00004323.1";
Contig13514	Putative_plincRNA	stop_codon	244079	244081	.	+	0	gene_id "TCONS_00004323"; transcript_id "TCONS_00004323"; exon_number "1"; exon_id "TCONS_00004323.1";
