# Supplementary material for: Landscape of histone modifications in a sponge reveals the origin of animal cis-regulatory complexity
Source: eLife. 2017 Apr 11;6:e22194. doi: 10.7554/eLife.22194 (PMC5429095; doi:10.7554/eLife.22194)
Supplement: Figure 6—source data 1. — DOI: http://dx.doi.org/10.7554/eLife.22194.029 [file elife-22194-fig6-data1.xlsx]

## Sheet: Figure 6-Source Data 1
Figure 6-source data 1. Genomic location of all the predicted activated enhancer-like elements and their distance to the closest TSS.
Adult
Contig10298	5045	6258	Contig10298	3969	3970	Aqu2.1.08473_001	0	+	1076
Contig10702	6049	7365	.	-1	-1	.	-1	.	-1
Contig10950	6746	7595	Contig10950	731	732	Aqu2.1.09575_001	0	+	6015
Contig11351	35	1072	.	-1	-1	.	-1	.	-1
Contig11613	9361	10154	Contig11613	10538	10539	Aqu2.1.11108_001	0	-	385
Contig11732	2938	3942	Contig11732	11250	11251	Aqu2.1.11456_001	0	+	7309
Contig11818	7779	8283	Contig11818	12263	12264	Aqu2.1.11697_001	0	-	3981
Contig11921	5268	6539	Contig11921	4452	4453	Aqu2.1.12026_001	0	-	816
Contig12026	3550	3984	Contig12026	1568	1569	Aqu2.1.12386_001	0	-	1982
Contig12140	2191	3136	Contig12140	1785	1786	Aqu2.1.12775_001	0	-	406
Contig12155	15480	15930	Contig12155	13938	13939	Aqu2.1.12833_001	0	+	1542
Contig12164	12955	14411	Contig12164	7546	7547	Aqu2.1.12864_001	0	+	5409
Contig12220	8936	9485	Contig12220	2857	2858	Aqu2.1.13093_001	0	-	6079
Contig12220	10727	13188	Contig12220	16344	16345	Aqu2.1.13094_001	0	-	3157
Contig12262	16169	16890	Contig12262	14569	14570	Aqu2.1.13275_001	0	+	1600
Contig12287	330	2220	Contig12287	6153	6154	Aqu2.1.13390_001	0	-	3934
Contig12287	17059	18145	Contig12287	8603	8604	Aqu2.1.13391_001	0	-	8456
Contig12287	17059	18145	Contig12287	8603	8604	Aqu2.1.13392_001	0	-	8456
Contig12363	15513	16070	Contig12363	16732	16733	Aqu2.1.13733_001	0	-	663
Contig12523	6949	11754	Contig12523	22322	22323	Aqu2.1.14626_001	0	-	10569
Contig12631	9478	11524	Contig12631	13647	13648	Aqu2.1.15373_001	0	+	2124
Contig12738	220	1302	Contig12738	6430	6431	Aqu2.1.16220_001	0	+	5129
Contig12738	220	1302	Contig12738	6430	6431	Aqu2.1.16221_001	0	+	5129
Contig12759	30980	31462	Contig12759	29693	29694	Aqu2.1.16430_001	0	-	1287
Contig12759	32563	34571	Contig12759	29693	29694	Aqu2.1.16430_001	0	-	2870
Contig12819	16653	18306	Contig12819	20439	20440	Aqu2.1.17019_001	0	-	2134
Contig12834	8310	9315	Contig12834	6366	6367	Aqu2.1.17150_001	0	+	1944
Contig12875	337	2186	Contig12875	6068	6069	Aqu2.1.17524_001	0	-	3883
Contig12892	6465	8451	Contig12892	11248	11249	Aqu2.1.17693_001	0	-	2798
Contig12892	14205	15237	Contig12892	12698	12699	Aqu2.1.17694_001	0	-	1507
Contig12953	17652	18670	Contig12953	16414	16415	Aqu2.1.18432_001	0	-	1238
Contig12982	16343	17990	Contig12982	15884	15885	Aqu2.1.18808_001	0	-	459
Contig12982	32036	32820	Contig12982	33117	33118	Aqu2.1.18815_001	0	+	298
Contig12982	48816	49760	Contig12982	47707	47708	Aqu2.1.18821_001	0	+	1109
Contig12986	17386	18454	Contig12986	19002	19003	Aqu2.1.18860_001	0	-	549
Contig12996	8549	9165	Contig12996	8346	8347	Aqu2.1.19008_001	0	+	203
Contig13001	42549	44174	Contig13001	41561	41562	Aqu2.1.19097_001	0	-	988
Contig13003	22622	24258	Contig13003	21981	21982	Aqu2.1.19140_001	0	-	641
Contig13007	8741	10606	Contig13007	4682	4683	Aqu2.1.19192_001	0	+	4059
Contig13007	40574	42874	Contig13007	39806	39807	Aqu2.1.19198_001	0	-	768
Contig13010	23701	26456	Contig13010	20131	20132	Aqu2.1.19235_001	0	+	3570
Contig13019	29904	31196	Contig13019	33973	33974	Aqu2.1.19430_001	0	-	2778
Contig13025	8220	9195	Contig13025	10637	10638	Aqu2.1.19531_001	0	+	1443
Contig13025	54373	55214	Contig13025	56293	56294	Aqu2.1.19545_001	0	+	1080
Contig13054	20604	21201	Contig13054	16327	16328	Aqu2.1.20047_001	0	+	4277
Contig13058	2570	2931	Contig13058	1718	1719	Aqu2.1.20120_001	0	+	852
Contig13059	75138	75639	Contig13059	76852	76853	Aqu2.1.20152_001	0	-	1214
Contig13062	33226	33898	Contig13062	30303	30304	Aqu2.1.20197_001	0	-	2923
Contig13063	56301	58282	Contig13063	55969	55970	Aqu2.1.20221_001	0	+	332
Contig13064	13225	13750	Contig13064	12716	12717	Aqu2.1.20237_001	0	+	509
Contig13069	16071	17530	Contig13069	13355	13356	Aqu2.1.20355_001	0	+	2716
Contig13069	25894	28271	Contig13069	32430	32431	Aqu2.1.20356_001	0	-	4160
Contig13104	51388	52959	Contig13104	47018	47019	Aqu2.1.21079_001	0	-	4370
Contig13104	53723	55403	Contig13104	47018	47019	Aqu2.1.21079_001	0	-	6705
Contig13104	57598	58602	Contig13104	63318	63319	Aqu2.1.21080_001	0	-	4717
Contig13104	59876	61259	Contig13104	63318	63319	Aqu2.1.21080_001	0	-	2060
Contig13104	74745	76782	Contig13104	74230	74231	Aqu2.1.21085_001	0	+	515
Contig13111	10008	10663	Contig13111	8304	8305	Aqu2.1.21246_001	0	+	1704
Contig13111	71229	73300	Contig13111	73833	73834	Aqu2.1.21264_001	0	-	534
Contig13111	78079	80305	Contig13111	83539	83540	Aqu2.1.21266_001	0	+	3235
Contig13119	23196	23766	Contig13119	27237	27238	Aqu2.1.21442_001	0	-	3472
Contig13123	75094	77341	Contig13123	82214	82215	Aqu2.1.21524_001	0	-	4874
Contig13125	82182	83072	Contig13125	83900	83901	Aqu2.1.21553_001	0	-	829
Contig13133	5124	5536	Contig13133	695	696	Aqu2.1.21722_001	0	+	4429
Contig13140	52442	53256	Contig13140	50689	50690	Aqu2.1.21886_001	0	+	1753
Contig13140	55482	56190	Contig13140	58038	58039	Aqu2.1.21887_001	0	-	1849
Contig13155	82519	83066	Contig13155	87275	87276	Aqu2.1.22213_001	0	-	4210
Contig13157	57095	58034	Contig13157	54329	54330	Aqu2.1.22251_001	0	+	2766
Contig13164	16922	17246	Contig13164	12208	12209	Aqu2.1.22391_001	0	-	4714
Contig13165	50632	51086	Contig13165	49576	49577	Aqu2.1.22429_001	0	+	1056
Contig13167	50464	52153	Contig13167	47533	47534	Aqu2.1.22480_001	0	-	2931
Contig13178	77191	78977	Contig13178	79287	79288	Aqu2.1.22805_001	0	-	311
Contig13178	80758	83625	Contig13178	84672	84673	Aqu2.1.22806_001	0	-	1048
Contig13185	46055	46938	Contig13185	45416	45417	Aqu2.1.22997_001	0	+	639
Contig13185	47597	49904	Contig13185	45416	45417	Aqu2.1.22997_001	0	+	2181
Contig13185	81714	85099	Contig13185	86098	86099	Aqu2.1.23008_001	0	+	1000
Contig13191	68876	70189	Contig13191	70994	70995	Aqu2.1.23216_001	0	-	806
Contig13191	92139	93978	Contig13191	89218	89219	Aqu2.1.23217_001	0	+	2921
Contig13191	94652	95187	Contig13191	89218	89219	Aqu2.1.23217_001	0	+	5434
Contig13191	98309	99004	Contig13191	89218	89219	Aqu2.1.23217_001	0	+	9091
Contig13197	2597	5962	Contig13197	7426	7427	Aqu2.1.23374_001	0	-	1465
Contig13197	74916	76885	Contig13197	78209	78210	Aqu2.1.23393_001	0	+	1325
Contig13197	82016	83790	Contig13197	78280	78281	Aqu2.1.23392_001	0	-	3736
Contig13197	92994	95469	Contig13197	96132	96133	Aqu2.1.23395_001	0	+	664
Contig13200	48489	50422	Contig13200	57447	57448	Aqu2.1.23473_001	0	-	7026
Contig13200	51065	52084	Contig13200	57447	57448	Aqu2.1.23473_001	0	-	5364
Contig13200	112813	114231	Contig13200	109904	109905	Aqu2.1.23486_001	0	+	2909
Contig13203	109998	112722	Contig13203	109624	109625	Aqu2.1.23571_001	0	+	374
Contig13206	55191	56199	Contig13206	56709	56710	Aqu2.1.23641_001	0	-	511
Contig13210	25242	25738	Contig13210	23234	23235	Aqu2.1.23730_001	0	+	2008
Contig13213	88754	89827	Contig13213	87795	87796	Aqu2.1.23854_001	0	+	959
Contig13213	93881	96803	Contig13213	98383	98384	Aqu2.1.23856_001	0	-	1581
Contig13214	16256	18660	Contig13214	14009	14010	Aqu2.1.23866_001	0	-	2247
Contig13214	24968	27181	Contig13214	21660	21661	Aqu2.1.23869_001	0	+	3308
Contig13215	43999	45031	Contig13215	42234	42235	Aqu2.1.23917_001	0	+	1765
Contig13217	40283	41955	Contig13217	38701	38702	Aqu2.1.23946_001	0	-	1582
Contig13228	66141	68321	Contig13228	65402	65403	Aqu2.1.24275_001	0	-	739
Contig13228	78240	78961	Contig13228	81114	81115	Aqu2.1.24277_001	0	-	2154
Contig13229	31400	32668	Contig13229	34444	34445	Aqu2.1.24301_001	0	-	1777
Contig13236	6014	6752	Contig13236	3375	3376	Aqu2.1.24487_001	0	-	2639
Contig13236	76671	78684	Contig13236	79124	79125	Aqu2.1.24512_001	0	+	441
Contig13236	82737	85855	Contig13236	86153	86154	Aqu2.1.24515_001	0	+	299
Contig13237	40461	43690	Contig13237	34829	34830	Aqu2.1.24542_001	0	+	5632
Contig13237	44545	47964	Contig13237	54487	54488	Aqu2.1.24543_001	0	-	6524
Contig13237	48777	50074	Contig13237	54487	54488	Aqu2.1.24543_001	0	-	4414
Contig13238	94721	96406	Contig13238	88764	88765	Aqu2.1.24588_001	0	-	5957
Contig13240	30602	31372	Contig13240	40916	40917	Aqu2.1.24632_001	0	+	9545
Contig13242	6925	7693	Contig13242	10910	10911	Aqu2.1.24676_001	0	+	3218
Contig13248	123071	124607	Contig13248	121931	121932	Aqu2.1.24907_001	0	+	1140
Contig13249	2650	3358	Contig13249	409	410	Aqu2.1.24910_001	0	+	2241
Contig13251	40807	41848	Contig13251	45231	45232	Aqu2.1.24972_001	0	-	3384
Contig13255	66808	67595	Contig13255	72705	72706	Aqu2.1.25121_001	0	-	5111
Contig13255	99336	100881	Contig13255	98000	98001	Aqu2.1.25126_001	0	+	1336
Contig13260	71202	72717	Contig13260	68183	68184	Aqu2.1.25310_001	0	+	3019
Contig13261	84544	85367	Contig13261	82826	82827	Aqu2.1.25340_001	0	+	1718
Contig13263	73324	75119	Contig13263	75586	75587	Aqu2.1.25399_001	0	-	468
Contig13264	68290	69863	Contig13264	70907	70908	Aqu2.1.25436_001	0	-	1045
Contig13267	100922	105948	Contig13267	99473	99474	Aqu2.1.25568_001	0	+	1449
Contig13267	118364	120244	Contig13267	117744	117745	Aqu2.1.25572_001	0	+	620
Contig13268	104544	105353	Contig13268	110281	110282	Aqu2.1.25601_001	0	-	4929
Contig13273	34226	35140	Contig13273	36244	36245	Aqu2.1.25749_001	0	-	1105
Contig13273	37686	40243	Contig13273	41562	41563	Aqu2.1.25751_001	0	-	1320
Contig13273	45818	48614	Contig13273	45590	45591	Aqu2.1.25753_001	0	-	228
Contig13274	49341	50663	Contig13274	48893	48894	Aqu2.1.25789_001	0	-	448
Contig13276	34982	35579	Contig13276	33413	33414	Aqu2.1.25860_001	0	+	1569
Contig13276	38777	40839	Contig13276	37558	37559	Aqu2.1.25862_001	0	+	1219
Contig13276	41438	41994	Contig13276	45613	45614	Aqu2.1.25863_001	0	-	3620
Contig13276	42759	44023	Contig13276	45613	45614	Aqu2.1.25863_001	0	-	1591
Contig13276	91614	92387	Contig13276	90397	90398	Aqu2.1.25874_001	0	+	1217
Contig13278	26646	28058	Contig13278	30637	30638	Aqu2.1.25924_001	0	-	2580
Contig13278	28902	29642	Contig13278	30637	30638	Aqu2.1.25924_001	0	-	996
Contig13278	43645	45187	Contig13278	48514	48515	Aqu2.1.25928_001	0	-	3328
Contig13281	124753	126271	Contig13281	121990	121991	Aqu2.1.26040_001	0	+	2763
Contig13284	20869	23491	Contig13284	24139	24140	Aqu2.1.26112_001	0	+	649
Contig13284	126000	127126	Contig13284	127774	127775	Aqu2.1.26153_001	0	-	649
Contig13286	138983	139772	Contig13286	134597	134598	Aqu2.1.26222_001	0	-	4386
Contig13286	140551	142928	Contig13286	134597	134598	Aqu2.1.26222_001	0	-	5954
Contig13289	17358	19192	Contig13289	22287	22288	Aqu2.1.26307_001	0	-	3096
Contig13297	53348	56890	Contig13297	51227	51228	Aqu2.1.26604_001	0	+	2121
Contig13297	115546	117519	Contig13297	119739	119740	Aqu2.1.26614_001	0	-	2221
Contig13298	101131	103089	Contig13298	106375	106376	Aqu2.1.26649_001	0	-	3287
Contig13304	123472	126883	Contig13304	131766	131767	Aqu2.1.26854_001	0	-	4884
Contig13307	81338	81775	Contig13307	80393	80394	Aqu2.1.26958_001	0	-	945
Contig13308	20636	22484	Contig13308	18351	18352	Aqu2.1.26985_001	0	+	2285
Contig13308	85092	85650	Contig13308	81908	81909	Aqu2.1.27007_001	0	-	3184
Contig13308	91671	97741	Contig13308	90773	90774	Aqu2.1.27009_001	0	-	898
Contig13310	106791	109040	Contig13310	109722	109723	Aqu2.1.27080_001	0	-	683
Contig13311	37908	38609	Contig13311	39740	39741	Aqu2.1.27108_001	0	-	1132
Contig13311	58617	61401	Contig13311	58325	58326	Aqu2.1.27110_001	0	+	292
Contig13313	16073	17636	Contig13313	9058	9059	Aqu2.1.27176_001	0	+	7015
Contig13313	81100	82219	Contig13313	83074	83075	Aqu2.1.27189_001	0	-	856
Contig13314	102662	104195	Contig13314	105088	105089	Aqu2.1.27252_001	0	-	894
Contig13315	34027	34500	Contig13315	29733	29734	Aqu2.1.27279_001	0	+	4294
Contig13316	47987	49299	Contig13316	47125	47126	Aqu2.1.27334_001	0	+	862
Contig13316	73260	74133	Contig13316	76544	76545	Aqu2.1.27340_001	0	-	2412
Contig13316	77633	79044	Contig13316	76544	76545	Aqu2.1.27340_001	0	-	1089
Contig13316	125187	126169	Contig13316	123123	123124	Aqu2.1.27353_001	0	+	2064
Contig13316	127699	129169	Contig13316	123123	123124	Aqu2.1.27353_001	0	+	4576
Contig13316	149475	154589	Contig13316	149178	149179	Aqu2.1.27357_001	0	+	297
Contig13317	41292	44107	Contig13317	45241	45242	Aqu2.1.27372_001	0	+	1135
Contig13318	70664	71021	Contig13318	72825	72826	Aqu2.1.27410_001	0	-	1805
Contig13320	49521	50908	Contig13320	52200	52201	Aqu2.1.27474_001	0	+	1293
Contig13322	22099	23417	Contig13322	24870	24871	Aqu2.1.27542_001	0	-	1454
Contig13324	153441	154053	Contig13324	154639	154640	Aqu2.1.27637_001	0	+	587
Contig13330	80464	81739	Contig13330	83066	83067	Aqu2.1.27885_001	0	+	1328
Contig13330	92881	95810	Contig13330	83066	83067	Aqu2.1.27885_001	0	+	9815
Contig13331	128052	128846	Contig13331	127411	127412	Aqu2.1.27942_001	0	+	641
Contig13335	112696	113895	Contig13335	115309	115310	Aqu2.1.28098_001	0	-	1415
Contig13339	91821	93103	Contig13339	95114	95115	Aqu2.1.28273_001	0	-	2012
Contig13339	140932	143372	Contig13339	143625	143626	Aqu2.1.28282_001	0	-	254
Contig13339	144941	145556	Contig13339	143625	143626	Aqu2.1.28282_001	0	-	1316
Contig13340	75976	76659	Contig13340	75618	75619	Aqu2.1.28315_001	0	-	358
Contig13343	180866	182586	Contig13343	175664	175665	Aqu2.1.28466_001	0	+	5202
Contig13345	100426	101828	Contig13345	96183	96184	Aqu2.1.28569_001	0	-	4243
Contig13348	128306	128992	Contig13348	131731	131732	Aqu2.1.28726_001	0	-	2740
Contig13350	57003	57863	Contig13350	58243	58244	Aqu2.1.28799_001	0	+	381
Contig13350	150310	151592	Contig13350	147508	147509	Aqu2.1.28818_001	0	+	2802
Contig13353	154610	155503	Contig13353	156902	156903	Aqu2.1.28987_001	0	+	1400
Contig13358	91738	92714	Contig13358	90678	90679	Aqu2.1.29223_001	0	+	1060
Contig13361	39505	41163	Contig13361	41916	41917	Aqu2.1.29360_001	0	-	754
Contig13361	63979	66758	Contig13361	72693	72694	Aqu2.1.29372_001	0	-	5936
Contig13361	67412	68902	Contig13361	72693	72694	Aqu2.1.29372_001	0	-	3792
Contig13361	183186	183799	Contig13361	181942	181943	Aqu2.1.29390_001	0	+	1244
Contig13364	65991	66763	Contig13364	75526	75527	Aqu2.1.29479_001	0	+	8764
Contig13364	67384	68481	Contig13364	75526	75527	Aqu2.1.29479_001	0	+	7046
Contig13364	70570	72606	Contig13364	75526	75527	Aqu2.1.29479_001	0	+	2921
Contig13366	161711	162126	Contig13366	161494	161495	Aqu2.1.29607_001	0	-	217
Contig13367	30028	32829	Contig13367	27016	27017	Aqu2.1.29620_001	0	+	3012
Contig13367	83507	87274	Contig13367	90032	90033	Aqu2.1.29629_001	0	-	2759
Contig13372	31972	34061	Contig13372	29279	29280	Aqu2.1.29854_001	0	+	2693
Contig13372	60721	61776	Contig13372	63219	63220	Aqu2.1.29861_001	0	-	1444
Contig13372	60721	61776	Contig13372	63219	63220	Aqu2.1.29862_001	0	+	1444
Contig13372	161730	162462	Contig13372	159207	159208	Aqu2.1.29892_001	0	-	2523
Contig13372	173263	173673	Contig13372	172839	172840	Aqu2.1.29899_001	0	+	424
Contig13373	13528	14778	Contig13373	15144	15145	Aqu2.1.29910_001	0	-	367
Contig13373	90303	91738	Contig13373	91938	91939	Aqu2.1.29937_001	0	-	201
Contig13373	157349	157963	Contig13373	157004	157005	Aqu2.1.29967_001	0	+	345
Contig13373	158590	159696	Contig13373	157004	157005	Aqu2.1.29967_001	0	+	1586
Contig13374	84461	86414	Contig13374	84214	84215	Aqu2.1.30011_001	0	+	247
Contig13374	188277	190884	Contig13374	185813	185814	Aqu2.1.30046_001	0	+	2464
Contig13379	84774	85638	Contig13379	85937	85938	Aqu2.1.30255_001	0	-	300
Contig13380	156001	156953	Contig13380	152512	152513	Aqu2.1.30307_001	0	+	3489
Contig13384	40925	41851	Contig13384	37873	37874	Aqu2.1.30487_001	0	+	3052
Contig13384	43699	44674	Contig13384	37873	37874	Aqu2.1.30487_001	0	+	5826
Contig13384	46370	47008	Contig13384	37873	37874	Aqu2.1.30487_001	0	+	8497
Contig13384	63486	64433	Contig13384	65175	65176	Aqu2.1.30492_001	0	+	743
Contig13384	120082	121373	Contig13384	119801	119802	Aqu2.1.30507_001	0	+	281
Contig13385	99599	100544	Contig13385	102888	102889	Aqu2.1.30550_001	0	+	2345
Contig13386	213689	215091	Contig13386	198467	198468	Aqu2.1.30625_001	0	+	15222
Contig13389	106041	108207	Contig13389	103655	103656	Aqu2.1.30728_001	0	+	2386
Contig13394	102573	103382	Contig13394	105623	105624	Aqu2.1.31014_001	0	+	2242
Contig13395	71074	71531	Contig13395	61989	61990	Aqu2.1.31041_001	0	+	9085
Contig13398	38445	40308	Contig13398	33013	33014	Aqu2.1.31153_001	0	+	5432
Contig13398	51466	52684	Contig13398	60425	60426	Aqu2.1.31154_001	0	-	7742
Contig13398	62577	63315	Contig13398	64912	64913	Aqu2.1.31156_001	0	-	1598
Contig13398	77383	78139	Contig13398	78640	78641	Aqu2.1.31161_001	0	-	502
Contig13398	108018	109309	Contig13398	109917	109918	Aqu2.1.31172_001	0	+	609
Contig13398	124066	125180	Contig13398	123484	123485	Aqu2.1.31177_001	0	-	582
Contig13398	172854	173922	Contig13398	175994	175995	Aqu2.1.31184_001	0	-	2073
Contig13398	195383	197895	Contig13398	193541	193542	Aqu2.1.31192_001	0	+	1842
Contig13401	12458	14503	Contig13401	17438	17439	Aqu2.1.31337_001	0	-	2936
Contig13401	35209	35962	Contig13401	33859	33860	Aqu2.1.31344_001	0	+	1350
Contig13401	54658	56793	Contig13401	57599	57600	Aqu2.1.31351_001	0	+	807
Contig13403	48851	49541	Contig13403	54681	54682	Aqu2.1.31482_001	0	+	5141
Contig13403	90332	92382	Contig13403	94169	94170	Aqu2.1.31488_001	0	+	1788
Contig13404	234436	235166	Contig13404	236506	236507	Aqu2.1.31566_001	0	+	1341
Contig13405	30263	30991	Contig13405	25638	25639	Aqu2.1.31574_001	0	-	4625
Contig13406	54934	55463	Contig13406	53529	53530	Aqu2.1.31625_001	0	-	1405
Contig13406	54934	55463	Contig13406	53529	53530	Aqu2.1.31629_001	0	-	1405
Contig13409	52966	53922	Contig13409	50182	50183	Aqu2.1.31783_001	0	+	2784
Contig13409	64951	66423	Contig13409	61632	61633	Aqu2.1.31786_001	0	+	3319
Contig13411	107430	108241	Contig13411	106515	106516	Aqu2.1.31917_001	0	+	915
Contig13411	190379	191621	Contig13411	194668	194669	Aqu2.1.31939_001	0	-	3048
Contig13414	41515	42614	Contig13414	43786	43787	Aqu2.1.32090_001	0	-	1173
Contig13414	155820	158100	Contig13414	159081	159082	Aqu2.1.32127_001	0	-	982
Contig13414	197520	198666	Contig13414	197289	197290	Aqu2.1.32142_001	0	+	231
Contig13416	144153	147047	Contig13416	143700	143701	Aqu2.1.32251_001	0	+	453
Contig13416	229702	232851	Contig13416	228219	228220	Aqu2.1.32274_001	0	+	1483
Contig13420	55014	55986	Contig13420	58107	58108	Aqu2.1.32475_001	0	-	2122
Contig13420	61882	62976	Contig13420	60257	60258	Aqu2.1.32478_001	0	+	1625
Contig13420	138402	141220	Contig13420	136453	136454	Aqu2.1.32501_001	0	-	1949
Contig13421	37998	39279	Contig13421	39908	39909	Aqu2.1.32541_001	0	-	630
Contig13421	58344	62921	Contig13421	57350	57351	Aqu2.1.32549_001	0	+	994
Contig13421	150220	151555	Contig13421	151812	151813	Aqu2.1.32583_001	0	+	258
Contig13421	217716	218877	Contig13421	214575	214576	Aqu2.1.32603_001	0	+	3141
Contig13421	222622	223426	Contig13421	225258	225259	Aqu2.1.32604_001	0	-	1833
Contig13424	80250	80919	Contig13424	82034	82035	Aqu2.1.32722_001	0	-	1116
Contig13424	213211	214100	Contig13424	215339	215340	Aqu2.1.32748_001	0	-	1240
Contig13426	141906	143297	Contig13426	143528	143529	Aqu2.1.32869_001	0	+	232
Contig13426	215693	217677	Contig13426	213045	213046	Aqu2.1.32875_001	0	+	2648
Contig13426	233879	236000	Contig13426	233574	233575	Aqu2.1.32878_001	0	+	305
Contig13426	238500	240313	Contig13426	237002	237003	Aqu2.1.32880_001	0	+	1498
Contig13427	40961	42557	Contig13427	38850	38851	Aqu2.1.32900_001	0	-	2111
Contig13427	86304	86766	Contig13427	81211	81212	Aqu2.1.32913_001	0	+	5093
Contig13427	122547	123079	Contig13427	121312	121313	Aqu2.1.32924_001	0	+	1235
Contig13427	197070	197672	Contig13427	196200	196201	Aqu2.1.32944_001	0	-	870
Contig13427	227898	228501	Contig13427	229588	229589	Aqu2.1.32959_001	0	+	1088
Contig13428	121170	122227	Contig13428	117453	117454	Aqu2.1.32998_001	0	-	3717
Contig13429	10782	11259	Contig13429	12126	12127	Aqu2.1.33025_001	0	-	868
Contig13429	16219	17225	Contig13429	13528	13529	Aqu2.1.33027_001	0	+	2691
Contig13429	54256	54675	Contig13429	55117	55118	Aqu2.1.33044_001	0	+	443
Contig13429	218440	221082	Contig13429	221685	221686	Aqu2.1.33103_001	0	+	604
Contig13433	49680	51293	Contig13433	52013	52014	Aqu2.1.33324_001	0	-	721
Contig13433	56726	57139	Contig13433	54081	54082	Aqu2.1.33325_001	0	+	2645
Contig13433	60706	61239	Contig13433	60289	60290	Aqu2.1.33326_001	0	-	417
Contig13433	75113	76518	Contig13433	74871	74872	Aqu2.1.33332_001	0	+	242
Contig13433	79778	82202	Contig13433	74871	74872	Aqu2.1.33332_001	0	+	4907
Contig13433	218406	219472	Contig13433	217533	217534	Aqu2.1.33380_001	0	+	873
Contig13433	260934	263621	Contig13433	259896	259897	Aqu2.1.33396_001	0	+	1038
Contig13433	264339	265127	Contig13433	267115	267116	Aqu2.1.33397_001	0	-	1989
Contig13434	157975	159463	Contig13434	153466	153467	Aqu2.1.33447_001	0	+	4509
Contig13434	173211	174518	Contig13434	168476	168477	Aqu2.1.33449_001	0	+	4735
Contig13434	177980	180130	Contig13434	188217	188218	Aqu2.1.33448_001	0	-	8088
Contig13434	184103	186041	Contig13434	188217	188218	Aqu2.1.33448_001	0	-	2177
Contig13434	200991	202113	Contig13434	200650	200651	Aqu2.1.33453_001	0	-	341
Contig13434	247977	249018	Contig13434	246541	246542	Aqu2.1.33474_001	0	+	1436
Contig13435	34706	35502	Contig13435	37877	37878	Aqu2.1.33494_001	0	-	2376
Contig13435	119944	122602	Contig13435	123351	123352	Aqu2.1.33513_001	0	+	750
Contig13435	129975	131168	Contig13435	123351	123352	Aqu2.1.33513_001	0	+	6624
Contig13435	141347	142720	Contig13435	145039	145040	Aqu2.1.33515_001	0	+	2320
Contig13435	275638	277125	Contig13435	275268	275269	Aqu2.1.33554_001	0	+	370
Contig13436	127590	128000	Contig13436	128666	128667	Aqu2.1.33596_001	0	+	667
Contig13436	173695	175834	Contig13436	177929	177930	Aqu2.1.33609_001	0	+	2096
Contig13437	48117	49976	Contig13437	45828	45829	Aqu2.1.33666_001	0	+	2289
Contig13437	145979	146948	Contig13437	148351	148352	Aqu2.1.33696_001	0	-	1404
Contig13438	42043	43512	Contig13438	49759	49760	Aqu2.1.33724_001	0	-	6248
Contig13438	45949	46671	Contig13438	49759	49760	Aqu2.1.33724_001	0	-	3089
Contig13438	47513	48849	Contig13438	49759	49760	Aqu2.1.33724_001	0	-	911
Contig13438	64534	66253	Contig13438	62728	62729	Aqu2.1.33727_001	0	+	1806
Contig13438	76390	76857	Contig13438	79872	79873	Aqu2.1.33729_001	0	-	3016
Contig13438	183065	183729	Contig13438	178197	178198	Aqu2.1.33762_001	0	+	4868
Contig13438	184314	187485	Contig13438	193582	193583	Aqu2.1.33763_001	0	-	6098
Contig13438	231338	231778	Contig13438	227988	227989	Aqu2.1.33769_001	0	+	3350
Contig13441	230014	231455	Contig13441	227852	227853	Aqu2.1.33939_001	0	+	2162
Contig13441	258194	260421	Contig13441	260869	260870	Aqu2.1.33952_001	0	+	449
Contig13443	128427	134510	Contig13443	139451	139452	Aqu2.1.34079_001	0	-	4942
Contig13445	37985	39247	Contig13445	40139	40140	Aqu2.1.34186_001	0	-	893
Contig13445	113726	114684	Contig13445	112974	112975	Aqu2.1.34201_001	0	+	752
Contig13445	146380	146681	Contig13445	135088	135089	Aqu2.1.34206_001	0	+	11292
Contig13445	229436	229872	Contig13445	227795	227796	Aqu2.1.34231_001	0	+	1641
Contig13446	236731	238706	Contig13446	241234	241235	Aqu2.1.34303_001	0	-	2529
Contig13448	78455	79151	Contig13448	80455	80456	Aqu2.1.34450_001	0	-	1305
Contig13448	151417	153971	Contig13448	155442	155443	Aqu2.1.34470_001	0	-	1472
Contig13448	234682	236611	Contig13448	239731	239732	Aqu2.1.34485_001	0	-	3121
Contig13450	174305	174943	Contig13450	167710	167711	Aqu2.1.34613_001	0	+	6595
Contig13452	171250	173109	Contig13452	171034	171035	Aqu2.1.34790_001	0	+	216
Contig13452	173995	175594	Contig13452	175892	175893	Aqu2.1.34791_001	0	-	299
Contig13453	32523	34596	Contig13453	34849	34850	Aqu2.1.34845_001	0	-	254
Contig13453	58732	59795	Contig13453	50912	50913	Aqu2.1.34853_001	0	+	7820
Contig13453	60491	62801	Contig13453	71325	71326	Aqu2.1.34854_001	0	-	8525
Contig13453	266839	267276	Contig13453	271456	271457	Aqu2.1.34928_001	0	-	4181
Contig13455	60191	61073	Contig13455	68959	68960	Aqu2.1.35038_001	0	-	7887
Contig13455	64214	65541	Contig13455	68959	68960	Aqu2.1.35038_001	0	-	3419
Contig13455	74393	77511	Contig13455	68959	68960	Aqu2.1.35038_001	0	-	5434
Contig13455	78926	80975	Contig13455	90546	90547	Aqu2.1.35039_001	0	-	9572
Contig13455	124872	125273	Contig13455	127322	127323	Aqu2.1.35048_001	0	-	2050
Contig13455	184077	186053	Contig13455	186300	186301	Aqu2.1.35054_001	0	-	248
Contig13456	89401	92409	Contig13456	93625	93626	Aqu2.1.35119_001	0	-	1217
Contig13456	103340	104754	Contig13456	103069	103070	Aqu2.1.35122_001	0	+	271
Contig13456	110854	111767	Contig13456	118188	118189	Aqu2.1.35123_001	0	+	6422
Contig13456	148692	150927	Contig13456	146743	146744	Aqu2.1.35140_001	0	+	1949
Contig13456	152039	152752	Contig13456	146743	146744	Aqu2.1.35140_001	0	+	5296
Contig13456	153346	153953	Contig13456	146743	146744	Aqu2.1.35140_001	0	+	6603
Contig13457	37616	38231	Contig13457	35454	35455	Aqu2.1.35208_001	0	+	2162
Contig13457	38905	39736	Contig13457	35454	35455	Aqu2.1.35208_001	0	+	3451
Contig13457	249740	253132	Contig13457	258961	258962	Aqu2.1.35276_001	0	-	5830
Contig13457	272048	273569	Contig13457	274044	274045	Aqu2.1.35282_001	0	-	476
Contig13458	336158	336792	Contig13458	335294	335295	Aqu2.1.35396_001	0	+	864
Contig13460	280473	282758	Contig13460	283768	283769	Aqu2.1.35559_001	0	-	1011
Contig13460	333078	334945	Contig13460	336372	336373	Aqu2.1.35571_001	0	-	1428
Contig13463	41139	45717	Contig13463	40054	40055	Aqu2.1.35745_001	0	+	1085
Contig13465	94143	95726	Contig13465	93411	93412	Aqu2.1.35958_001	0	-	732
Contig13465	105253	106432	Contig13465	106958	106959	Aqu2.1.35962_001	0	-	527
Contig13465	108069	110211	Contig13465	106958	106959	Aqu2.1.35962_001	0	-	1111
Contig13465	125831	127040	Contig13465	122488	122489	Aqu2.1.35965_001	0	-	3343
Contig13465	254191	256006	Contig13465	252427	252428	Aqu2.1.35996_001	0	+	1764
Contig13466	214206	218624	Contig13466	218869	218870	Aqu2.1.36074_001	0	-	246
Contig13466	280281	284830	Contig13466	293082	293083	Aqu2.1.36092_001	0	+	8253
Contig13466	362059	365377	Contig13466	340310	340311	Aqu2.1.36094_001	0	+	21749
Contig13467	92099	93321	Contig13467	94898	94899	Aqu2.1.36117_001	0	-	1578
Contig13467	199479	200487	Contig13467	195820	195821	Aqu2.1.36145_001	0	-	3659
Contig13468	191457	194886	Contig13468	196708	196709	Aqu2.1.36257_001	0	-	1823
Contig13468	298987	302475	Contig13468	293894	293895	Aqu2.1.36277_001	0	+	5093
Contig13468	326330	327109	Contig13468	327686	327687	Aqu2.1.36287_001	0	+	578
Contig13468	340130	341513	Contig13468	336067	336068	Aqu2.1.36290_001	0	+	4063
Contig13469	311462	319516	Contig13469	309345	309346	Aqu2.1.36374_001	0	-	2117
Contig13470	125000	126235	Contig13470	124546	124547	Aqu2.1.36416_001	0	+	454
Contig13471	33081	33478	Contig13471	32792	32793	Aqu2.1.36486_001	0	+	289
Contig13471	227990	228426	Contig13471	229784	229785	Aqu2.1.36546_001	0	+	1359
Contig13472	79233	82334	Contig13472	86385	86386	Aqu2.1.36604_001	0	-	4052
Contig13473	175624	178009	Contig13473	178216	178217	Aqu2.1.36692_001	0	-	208
Contig13473	181439	183895	Contig13473	179654	179655	Aqu2.1.36677_001	0	-	1785
Contig13473	251859	252204	Contig13473	250903	250904	Aqu2.1.36705_001	0	+	956
Contig13473	262499	263910	Contig13473	262216	262217	Aqu2.1.36708_001	0	+	283
Contig13478	53800	54432	Contig13478	48730	48731	Aqu2.1.37090_001	0	+	5070
Contig13478	55244	56573	Contig13478	60053	60054	Aqu2.1.37089_001	0	-	3481
Contig13478	110302	114247	Contig13478	109385	109386	Aqu2.1.37106_001	0	+	917
Contig13478	310765	311933	Contig13478	313137	313138	Aqu2.1.37163_001	0	+	1205
Contig13479	377450	378662	Contig13479	381589	381590	Aqu2.1.37298_001	0	-	2928
Contig13479	379269	380406	Contig13479	381589	381590	Aqu2.1.37298_001	0	-	1184
Contig13481	49702	50603	Contig13481	49498	49499	Aqu2.1.37422_001	0	-	204
Contig13481	60986	65474	Contig13481	55739	55740	Aqu2.1.37424_001	0	-	5247
Contig13481	66133	66586	Contig13481	70798	70799	Aqu2.1.37427_001	0	-	4213
Contig13481	171069	172169	Contig13481	176285	176286	Aqu2.1.37454_001	0	-	4117
Contig13481	179573	180125	Contig13481	177961	177962	Aqu2.1.37455_001	0	-	1612
Contig13481	274395	276753	Contig13481	278686	278687	Aqu2.1.37481_001	0	-	1934
Contig13481	357513	357841	Contig13481	357097	357098	Aqu2.1.37502_001	0	-	416
Contig13482	125386	128869	Contig13482	123823	123824	Aqu2.1.37548_001	0	+	1563
Contig13482	280343	282415	Contig13482	278197	278198	Aqu2.1.37583_001	0	-	2146
Contig13483	27985	28818	Contig13483	29348	29349	Aqu2.1.37634_001	0	+	531
Contig13483	177167	178107	Contig13483	174306	174307	Aqu2.1.37660_001	0	-	2861
Contig13484	41248	41782	Contig13484	40118	40119	Aqu2.1.37716_001	0	+	1130
Contig13484	250998	252269	Contig13484	252510	252511	Aqu2.1.37774_001	0	-	242
Contig13484	391302	393151	Contig13484	390332	390333	Aqu2.1.37812_001	0	+	970
Contig13485	200198	202290	Contig13485	197869	197870	Aqu2.1.37879_001	0	+	2329
Contig13485	210705	212252	Contig13485	217280	217281	Aqu2.1.37880_001	0	-	5029
Contig13485	215127	215704	Contig13485	217280	217281	Aqu2.1.37880_001	0	-	1577
Contig13485	280511	281292	Contig13485	277326	277327	Aqu2.1.37900_001	0	+	3185
Contig13485	281968	283910	Contig13485	286197	286198	Aqu2.1.37901_001	0	-	2288
Contig13485	305817	307165	Contig13485	305201	305202	Aqu2.1.37910_001	0	-	616
Contig13485	323844	324886	Contig13485	327084	327085	Aqu2.1.37919_001	0	-	2199
Contig13485	370436	371165	Contig13485	369525	369526	Aqu2.1.37939_001	0	-	911
Contig13485	421014	421663	Contig13485	420179	420180	Aqu2.1.37958_001	0	-	835
Contig13485	442000	442696	Contig13485	444240	444241	Aqu2.1.37967_001	0	-	1545
Contig13486	292647	295753	Contig13486	292175	292176	Aqu2.1.38043_001	0	+	472
Contig13486	457874	460797	Contig13486	454358	454359	Aqu2.1.38086_001	0	-	3516
Contig13487	157114	159410	Contig13487	163303	163304	Aqu2.1.38114_001	0	-	3894
Contig13487	248502	250189	Contig13487	252198	252199	Aqu2.1.38134_001	0	+	2010
Contig13487	265039	265736	Contig13487	263579	263580	Aqu2.1.38140_001	0	+	1460
Contig13487	357816	359255	Contig13487	354239	354240	Aqu2.1.38168_001	0	+	3577
Contig13487	391961	392822	Contig13487	389470	389471	Aqu2.1.38177_001	0	+	2491
Contig13487	399434	400980	Contig13487	396893	396894	Aqu2.1.38178_001	0	+	2541
Contig13489	32634	34310	Contig13489	31871	31872	Aqu2.1.38324_001	0	-	763
Contig13489	35382	38101	Contig13489	31871	31872	Aqu2.1.38324_001	0	-	3511
Contig13489	162295	165436	Contig13489	158738	158739	Aqu2.1.38356_001	0	-	3557
Contig13489	288906	289484	Contig13489	286068	286069	Aqu2.1.38404_001	0	+	2838
Contig13489	290243	293775	Contig13489	286068	286069	Aqu2.1.38404_001	0	+	4175
Contig13489	406728	407288	Contig13489	403797	403798	Aqu2.1.38441_001	0	+	2931
Contig13489	409629	411299	Contig13489	413857	413858	Aqu2.1.38442_001	0	-	2559
Contig13489	416056	416707	Contig13489	414252	414253	Aqu2.1.38443_001	0	+	1804
Contig13490	37129	39240	Contig13490	42626	42627	Aqu2.1.38470_001	0	-	3387
Contig13490	47340	48246	Contig13490	49191	49192	Aqu2.1.38473_001	0	+	946
Contig13490	369886	372507	Contig13490	374178	374179	Aqu2.1.38562_001	0	-	1672
Contig13490	454933	456442	Contig13490	453606	453607	Aqu2.1.38584_001	0	+	1327
Contig13491	156851	157506	Contig13491	152050	152051	Aqu2.1.38622_001	0	+	4801
Contig13491	330423	331015	Contig13491	332048	332049	Aqu2.1.38652_001	0	+	1034
Contig13491	413648	414989	Contig13491	412668	412669	Aqu2.1.38668_001	0	+	980
Contig13492	12308	12976	Contig13492	4801	4802	Aqu2.1.38690_001	0	+	7507
Contig13492	13810	15851	Contig13492	22448	22449	Aqu2.1.38691_001	0	-	6598
Contig13492	86190	86801	Contig13492	87037	87038	Aqu2.1.38713_001	0	-	237
Contig13492	166274	168636	Contig13492	168993	168994	Aqu2.1.38744_001	0	+	358
Contig13492	323020	325423	Contig13492	326461	326462	Aqu2.1.38788_001	0	-	1039
Contig13493	461836	464021	Contig13493	461434	461435	Aqu2.1.38941_001	0	-	402
Contig13495	262260	262648	Contig13495	260490	260491	Aqu2.1.39165_001	0	+	1770
Contig13495	317110	320391	Contig13495	315513	315514	Aqu2.1.39181_001	0	+	1597
Contig13496	47329	48318	Contig13496	46937	46938	Aqu2.1.39244_001	0	+	392
Contig13496	485405	486095	Contig13496	480115	480116	Aqu2.1.39348_001	0	+	5290
Contig13497	287744	288424	Contig13497	287501	287502	Aqu2.1.39415_001	0	-	243
Contig13499	29253	29861	Contig13499	26727	26728	Aqu2.1.39594_001	0	+	2526
Contig13499	127549	131277	Contig13499	126529	126530	Aqu2.1.39619_001	0	+	1020
Contig13499	150886	151968	Contig13499	149461	149462	Aqu2.1.39624_001	0	-	1425
Contig13499	158996	159767	Contig13499	160002	160003	Aqu2.1.39629_001	0	-	236
Contig13499	244775	245891	Contig13499	243857	243858	Aqu2.1.39647_001	0	+	918
Contig13499	263197	265552	Contig13499	262083	262084	Aqu2.1.39648_001	0	-	1114
Contig13499	478973	480031	Contig13499	478753	478754	Aqu2.1.39705_001	0	+	220
Contig13499	523818	525186	Contig13499	522738	522739	Aqu2.1.39717_001	0	+	1080
Contig13500	45736	46765	Contig13500	44852	44853	Aqu2.1.39734_001	0	-	884
Contig13500	76617	79990	Contig13500	74684	74685	Aqu2.1.39742_001	0	-	1933
Contig13500	104688	105223	Contig13500	106835	106836	Aqu2.1.39751_001	0	+	1613
Contig13500	109864	112690	Contig13500	114968	114969	Aqu2.1.39753_001	0	-	2279
Contig13500	323077	323791	Contig13500	321455	321456	Aqu2.1.39821_001	0	+	1622
Contig13501	350372	350812	Contig13501	350079	350080	Aqu2.1.40014_001	0	-	293
Contig13503	180567	181568	Contig13503	179775	179776	Aqu2.1.40218_001	0	+	792
Contig13504	456313	456847	Contig13504	456052	456053	Aqu2.1.40428_001	0	-	261
Contig13504	520708	521531	Contig13504	522724	522725	Aqu2.1.40442_001	0	-	1194
Contig13505	583884	585157	Contig13505	591844	591845	Aqu2.1.40600_001	0	-	6688
Contig13506	173666	175151	Contig13506	181347	181348	Aqu2.1.40639_001	0	-	6197
Contig13506	282023	283725	Contig13506	284066	284067	Aqu2.1.40674_001	0	+	342
Contig13506	385106	386296	Contig13506	386891	386892	Aqu2.1.40697_001	0	+	596
Contig13507	38832	39155	Contig13507	37338	37339	Aqu2.1.40781_001	0	-	1494
Contig13507	235526	236051	Contig13507	239156	239157	Aqu2.1.40831_001	0	-	3106
Contig13507	320266	320891	Contig13507	319380	319381	Aqu2.1.40861_001	0	-	886
Contig13507	390022	391621	Contig13507	389792	389793	Aqu2.1.40883_001	0	-	230
Contig13508	66853	68947	Contig13508	64169	64170	Aqu2.1.40972_001	0	+	2684
Contig13508	114092	116199	Contig13508	118727	118728	Aqu2.1.40985_001	0	+	2529
Contig13508	116871	118482	Contig13508	118727	118728	Aqu2.1.40985_001	0	+	246
Contig13508	187336	188916	Contig13508	180680	180681	Aqu2.1.41006_001	0	+	6656
Contig13508	189951	195631	Contig13508	199922	199923	Aqu2.1.41008_001	0	+	4292
Contig13508	255801	257830	Contig13508	255167	255168	Aqu2.1.41023_001	0	+	634
Contig13508	557369	558245	Contig13508	555223	555224	Aqu2.1.41119_001	0	-	2146
Contig13509	29520	31246	Contig13509	27096	27097	Aqu2.1.41157_001	0	+	2424
Contig13509	32715	34347	Contig13509	34762	34763	Aqu2.1.41158_001	0	-	416
Contig13509	182482	184011	Contig13509	178895	178896	Aqu2.1.41190_001	0	+	3587
Contig13509	235208	235539	Contig13509	232489	232490	Aqu2.1.41205_001	0	+	2719
Contig13509	236329	237068	Contig13509	232489	232490	Aqu2.1.41205_001	0	+	3840
Contig13509	239342	243879	Contig13509	248441	248442	Aqu2.1.41204_001	0	-	4563
Contig13509	265787	266275	Contig13509	267020	267021	Aqu2.1.41213_001	0	-	746
Contig13509	550314	551801	Contig13509	549903	549904	Aqu2.1.41314_001	0	+	411
Contig13509	632716	633128	Contig13509	630112	630113	Aqu2.1.41333_001	0	+	2604
Contig13510	218487	219461	Contig13510	217036	217037	Aqu2.1.41391_001	0	+	1451
Contig13510	352949	354347	Contig13510	367947	367948	Aqu2.1.41430_001	0	-	13601
Contig13511	63680	66207	Contig13511	68707	68708	Aqu2.1.41538_001	0	-	2501
Contig13511	78423	79650	Contig13511	83898	83899	Aqu2.1.41541_001	0	-	4249
Contig13511	161390	162625	Contig13511	174079	174080	Aqu2.1.41564_001	0	-	11455
Contig13511	223018	224018	Contig13511	218907	218908	Aqu2.1.41572_001	0	+	4111
Contig13511	225168	225972	Contig13511	230624	230625	Aqu2.1.41573_001	0	-	4653
Contig13512	119191	120648	Contig13512	122452	122453	Aqu2.1.41743_001	0	+	1805
Contig13512	124763	125246	Contig13512	122452	122453	Aqu2.1.41743_001	0	+	2311
Contig13512	506844	507544	Contig13512	503744	503745	Aqu2.1.41812_001	0	+	3100
Contig13513	288939	290542	Contig13513	291972	291973	Aqu2.1.41927_001	0	-	1431
Contig13513	339623	341026	Contig13513	342212	342213	Aqu2.1.41939_001	0	-	1187
Contig13513	437249	438406	Contig13513	440069	440070	Aqu2.1.41968_001	0	-	1664
Contig13513	611285	612322	Contig13513	613344	613345	Aqu2.1.42013_001	0	-	1023
Contig13513	709118	710310	Contig13513	708281	708282	Aqu2.1.42041_001	0	+	837
Contig13513	751145	753057	Contig13513	749167	749168	Aqu2.1.42051_001	0	+	1978
Contig13514	88158	90698	Contig13514	86588	86589	Aqu2.1.42089_001	0	+	1570
Contig13514	101798	102606	Contig13514	93451	93452	Aqu2.1.42090_001	0	-	8347
Contig13514	161360	163423	Contig13514	167037	167038	Aqu2.1.42116_001	0	+	3615
Contig13514	198854	201995	Contig13514	198016	198017	Aqu2.1.42130_001	0	+	838
Contig13514	333184	334209	Contig13514	335651	335652	Aqu2.1.42176_001	0	-	1443
Contig13514	380780	381918	Contig13514	386425	386426	Aqu2.1.42189_001	0	-	4508
Contig13514	401894	404135	Contig13514	409426	409427	Aqu2.1.42191_001	0	-	5292
Contig13514	485121	486098	Contig13514	478254	478255	Aqu2.1.42211_001	0	+	6867
Contig13516	14753	15430	Contig13516	19627	19628	Aqu2.1.42518_001	0	+	4198
Contig13516	100586	102171	Contig13516	102634	102635	Aqu2.1.42554_001	0	+	464
Contig13516	246146	247933	Contig13516	244491	244492	Aqu2.1.42608_001	0	-	1655
Contig13516	363735	365647	Contig13516	363358	363359	Aqu2.1.42636_001	0	+	377
Contig13516	363735	365647	Contig13516	366023	366024	Aqu2.1.42637_001	0	+	377
Contig13516	663506	665840	Contig13516	669393	669394	Aqu2.1.42709_001	0	-	3554
Contig13518	460438	462403	Contig13518	483209	483210	Aqu2.1.43104_001	0	-	20807
Contig13518	545645	551066	Contig13518	538159	538160	Aqu2.1.43119_001	0	+	7486
Contig13519	61880	63248	Contig13519	60683	60684	Aqu2.1.43272_001	0	+	1197
Contig13519	64045	64864	Contig13519	65966	65967	Aqu2.1.43271_001	0	-	1103
Contig13519	251794	252383	Contig13519	253062	253063	Aqu2.1.43331_001	0	-	680
Contig13519	381098	382877	Contig13519	384335	384336	Aqu2.1.43364_001	0	+	1459
Contig13519	615859	619013	Contig13519	614283	614284	Aqu2.1.43431_001	0	+	1576
Contig13519	692926	695663	Contig13519	690182	690183	Aqu2.1.43455_001	0	+	2744
Contig13519	699980	700829	Contig13519	699392	699393	Aqu2.1.43457_001	0	+	588
Contig13519	712423	715322	Contig13519	709468	709469	Aqu2.1.43460_001	0	+	2955
Contig13519	865347	867950	Contig13519	863729	863730	Aqu2.1.43509_001	0	+	1618
Contig13519	978286	981794	Contig13519	976237	976238	Aqu2.1.43549_001	0	+	2049
Contig13519	983106	983698	Contig13519	976237	976238	Aqu2.1.43549_001	0	+	6869
Contig13520	83601	85293	Contig13520	85613	85614	Aqu2.1.43588_001	0	+	321
Contig13520	125868	127515	Contig13520	125644	125645	Aqu2.1.43595_001	0	+	224
Contig13520	200005	201026	Contig13520	207106	207107	Aqu2.1.43607_001	0	-	6081
Contig13520	264793	265618	Contig13520	266931	266932	Aqu2.1.43632_001	0	-	1314
Contig13520	562974	563390	Contig13520	566254	566255	Aqu2.1.43713_001	0	-	2865
Contig13520	764613	766123	Contig13520	759094	759095	Aqu2.1.43775_001	0	+	5519
Contig13520	767189	767664	Contig13520	759094	759095	Aqu2.1.43775_001	0	+	8095
Contig13520	915699	916500	Contig13520	913623	913624	Aqu2.1.43810_001	0	+	2076
Contig13520	920446	922369	Contig13520	926961	926962	Aqu2.1.43811_001	0	-	4593
Contig13521	172770	173566	Contig13521	178199	178200	Aqu2.1.43881_001	0	-	4634
Contig13521	299693	300692	Contig13521	297750	297751	Aqu2.1.43907_001	0	+	1943
Contig13521	312867	314196	Contig13521	312417	312418	Aqu2.1.43908_001	0	-	450
Contig13521	396566	400056	Contig13521	401907	401908	Aqu2.1.43936_001	0	-	1852
Contig13521	435171	437321	Contig13521	438242	438243	Aqu2.1.43952_001	0	-	922
Contig13521	494980	497103	Contig13521	494513	494514	Aqu2.1.43975_001	0	+	467
Contig13521	529432	530397	Contig13521	539834	539835	Aqu2.1.43981_001	0	-	9438
Contig13521	636503	637748	Contig13521	634485	634486	Aqu2.1.44009_001	0	+	2018
Contig13521	650817	651756	Contig13521	650003	650004	Aqu2.1.44012_001	0	-	814
Contig13521	684667	685426	Contig13521	681776	681777	Aqu2.1.44020_001	0	+	2891
Contig13521	736636	740891	Contig13521	735121	735122	Aqu2.1.44038_001	0	+	1515
Contig13521	747788	749782	Contig13521	755613	755614	Aqu2.1.44039_001	0	-	5832
Contig13521	791720	793071	Contig13521	791342	791343	Aqu2.1.44051_001	0	+	378
Contig13521	960894	962010	Contig13521	965718	965719	Aqu2.1.44097_001	0	-	3709
Contig13521	1038434	1040020	Contig13521	1035571	1035572	Aqu2.1.44121_001	0	+	2863
Contig13521	1072178	1074371	Contig13521	1071580	1071581	Aqu2.1.44137_001	0	+	598
Contig13521	1111797	1113604	Contig13521	1109370	1109371	Aqu2.1.44149_001	0	+	2427
Contig13521	1233125	1234996	Contig13521	1236828	1236829	Aqu2.1.44184_001	0	-	1833
Contig13522	548888	550173	Contig13522	538806	538807	Aqu2.1.44365_001	0	-	10082
Contig13522	762759	764827	Contig13522	773721	773722	Aqu2.1.44417_001	0	+	8895
Contig13522	1664834	1665765	Contig13522	1667158	1667159	Aqu2.1.44668_001	0	+	1394
Contig13522	1776117	1780764	Contig13522	1775235	1775236	Aqu2.1.44693_001	0	+	882
Contig6013	1358	1742	.	-1	-1	.	-1	.	-1
Contig7177	86	1874	.	-1	-1	.	-1	.	-1
Contig8359	1827	2386	.	-1	-1	.	-1	.	-1
Larva
Contig10050	2658	2847	Contig10050	4113	4114	Aqu2.1.08041_001	0	-	1267
Contig10050	3443	3644	Contig10050	4113	4114	Aqu2.1.08041_001	0	-	470
Contig10125	4542	5235	Contig10125	3966	3967	Aqu2.1.08166_001	0	+	576
Contig10177	3005	3867	Contig10177	323	324	Aqu2.1.08249_001	0	+	2682
Contig10183	2551	3093	Contig10183	3824	3825	Aqu2.1.08257_001	0	-	732
Contig10283	1157	2064	Contig10283	3056	3057	Aqu2.1.08434_001	0	-	993
Contig10333	3675	3894	Contig10333	4377	4378	Aqu2.1.08555_001	0	-	484
Contig10396	2315	2877	.	-1	-1	.	-1	.	-1
Contig10435	4330	4565	Contig10435	6018	6019	Aqu2.1.08736_001	0	+	1454
Contig10524	6160	6409	Contig10524	6651	6652	Aqu2.1.08879_001	0	-	243
Contig10561	1822	2226	Contig10561	106	107	Aqu2.1.08932_001	0	+	1716
Contig10586	6555	7185	Contig10586	6275	6276	Aqu2.1.08968_001	0	+	280
Contig10632	4973	7279	Contig10632	4228	4229	Aqu2.1.09043_001	0	-	745
Contig10640	1786	1964	.	-1	-1	.	-1	.	-1
Contig10662	6997	7340	Contig10662	118	119	Aqu2.1.09087_001	0	+	6879
Contig10682	7193	7362	Contig10682	6063	6064	Aqu2.1.09130_001	0	-	1130
Contig10712	5837	6136	Contig10712	4656	4657	Aqu2.1.09178_001	0	+	1181
Contig10720	3472	4233	Contig10720	5216	5217	Aqu2.1.09199_001	0	-	984
Contig10722	4158	4342	Contig10722	5962	5963	Aqu2.1.09201_001	0	-	1621
Contig10722	6680	7427	Contig10722	5962	5963	Aqu2.1.09201_001	0	-	718
Contig10769	6191	7018	.	-1	-1	.	-1	.	-1
Contig10817	1172	1419	.	-1	-1	.	-1	.	-1
Contig10850	2778	3523	Contig10850	595	596	Aqu2.1.09413_001	0	+	2183
Contig10859	7474	7682	Contig10859	6552	6553	Aqu2.1.09430_001	0	+	922
Contig11027	6887	7043	Contig11027	7596	7597	Aqu2.1.09725_001	0	+	554
Contig11045	7674	7883	Contig11045	8095	8096	Aqu2.1.09754_001	0	-	213
Contig11053	7688	8130	Contig11053	5252	5253	Aqu2.1.09777_001	0	-	2436
Contig11069	44	1827	Contig11069	2240	2241	Aqu2.1.09825_001	0	-	414
Contig11085	95	564	Contig11085	6980	6981	Aqu2.1.09854_001	0	+	6417
Contig11088	8106	8298	Contig11088	6656	6657	Aqu2.1.09862_001	0	-	1450
Contig11102	6942	8035	Contig11102	5498	5499	Aqu2.1.09891_001	0	+	1444
Contig11119	4162	4560	Contig11119	3351	3352	Aqu2.1.09919_001	0	+	811
Contig11225	4781	5626	Contig11225	4488	4489	Aqu2.1.10135_001	0	+	293
Contig11231	7713	7907	Contig11231	8418	8419	Aqu2.1.10150_001	0	-	512
Contig11271	2658	2951	Contig11271	895	896	Aqu2.1.10229_001	0	-	1763
Contig11298	8833	9006	Contig11298	6448	6449	Aqu2.1.10280_001	0	-	2385
Contig11351	1918	3298	.	-1	-1	.	-1	.	-1
Contig11430	961	1136	Contig11430	2321	2322	Aqu2.1.10628_001	0	-	1186
Contig11455	43	229	Contig11455	4535	4536	Aqu2.1.10696_001	0	-	4307
Contig11455	2896	3144	Contig11455	4535	4536	Aqu2.1.10696_001	0	-	1392
Contig11540	1956	3229	Contig11540	1369	1370	Aqu2.1.10904_001	0	-	587
Contig11573	3142	3840	Contig11573	4337	4338	Aqu2.1.11002_001	0	-	498
Contig11621	6670	6899	Contig11621	1012	1013	Aqu2.1.11126_001	0	+	5658
Contig11649	4211	5946	Contig11649	6480	6481	Aqu2.1.11209_001	0	-	535
Contig11649	7253	8235	Contig11649	6480	6481	Aqu2.1.11209_001	0	-	773
Contig11674	1736	2036	Contig11674	8623	8624	Aqu2.1.11273_001	0	-	6588
Contig11674	6797	8354	Contig11674	8623	8624	Aqu2.1.11273_001	0	-	270
Contig11702	11127	11330	Contig11702	3762	3763	Aqu2.1.11354_001	0	-	7365
Contig11719	6042	6289	Contig11719	7814	7815	Aqu2.1.11415_001	0	-	1526
Contig11721	7147	7672	Contig11721	469	470	Aqu2.1.11421_001	0	+	6678
Contig11721	9196	10106	Contig11721	469	470	Aqu2.1.11421_001	0	+	8727
Contig11722	7486	8117	Contig11722	7212	7213	Aqu2.1.11424_001	0	+	274
Contig11728	1162	1570	Contig11728	6015	6016	Aqu2.1.11443_001	0	-	4446
Contig11761	11556	11844	Contig11761	8522	8523	Aqu2.1.11531_001	0	-	3034
Contig1177	103	296	Contig1177	601	602	Aqu2.1.00559_001	0	-	306
Contig11786	4455	4720	Contig11786	617	618	Aqu2.1.11610_001	0	+	3838
Contig1183	110	370	.	-1	-1	.	-1	.	-1
Contig11838	7203	7686	Contig11838	8819	8820	Aqu2.1.11754_001	0	+	1134
Contig11866	638	1514	Contig11866	3713	3714	Aqu2.1.11835_001	0	-	2200
Contig11878	6255	6871	Contig11878	1519	1520	Aqu2.1.11877_001	0	+	4736
Contig11886	11337	11597	Contig11886	8521	8522	Aqu2.1.11900_001	0	+	2816
Contig11886	12399	12768	Contig11886	8521	8522	Aqu2.1.11900_001	0	+	3878
Contig11892	8479	8713	Contig11892	8249	8250	Aqu2.1.11925_001	0	-	230
Contig11892	12233	12899	Contig11892	8249	8250	Aqu2.1.11925_001	0	-	3984
Contig11981	4166	4798	Contig11981	1571	1572	Aqu2.1.12223_001	0	+	2595
Contig11983	5677	5924	Contig11983	2044	2045	Aqu2.1.12233_001	0	+	3633
Contig11993	186	420	Contig11993	6671	6672	Aqu2.1.12280_001	0	-	6252
Contig11997	9262	9488	Contig11997	13396	13397	Aqu2.1.12299_001	0	-	3909
Contig12034	904	1200	Contig12034	501	502	Aqu2.1.12414_001	0	+	403
Contig12069	13399	14884	Contig12069	12226	12227	Aqu2.1.12523_001	0	-	1173
Contig12093	6221	7586	Contig12093	1628	1629	Aqu2.1.12625_001	0	+	4593
Contig12107	1948	2153	Contig12107	290	291	Aqu2.1.12652_001	0	+	1658
Contig12114	13145	13477	Contig12114	9399	9400	Aqu2.1.12683_001	0	+	3746
Contig12136	2193	2753	Contig12136	229	230	Aqu2.1.12763_001	0	+	1964
Contig12152	4840	4994	Contig12152	6608	6609	Aqu2.1.12817_001	0	+	1615
Contig12159	8359	8516	Contig12159	2543	2544	Aqu2.1.12842_001	0	-	5816
Contig12160	15605	15991	Contig12160	9226	9227	Aqu2.1.12847_001	0	-	6379
Contig12164	10622	11043	Contig12164	7546	7547	Aqu2.1.12864_001	0	+	3076
Contig12164	11867	12140	Contig12164	7546	7547	Aqu2.1.12864_001	0	+	4321
Contig12170	7695	8252	Contig12170	7355	7356	Aqu2.1.12897_001	0	-	340
Contig12170	7695	8252	Contig12170	7355	7356	Aqu2.1.12898_001	0	-	340
Contig12180	2724	3411	Contig12180	1175	1176	Aqu2.1.12944_001	0	+	1549
Contig12203	611	1185	.	-1	-1	.	-1	.	-1
Contig12215	8423	9218	Contig12215	5699	5700	Aqu2.1.13068_001	0	+	2724
Contig12223	414	1666	Contig12223	5696	5697	Aqu2.1.13100_001	0	-	4031
Contig12223	3810	4056	Contig12223	5696	5697	Aqu2.1.13100_001	0	-	1641
Contig12255	9412	9733	Contig12255	10279	10280	Aqu2.1.13240_001	0	-	547
Contig12258	7790	8663	Contig12258	9927	9928	Aqu2.1.13257_001	0	-	1265
Contig12260	3258	4647	Contig12260	2631	2632	Aqu2.1.13264_001	0	-	627
Contig12266	12227	12473	Contig12266	11151	11152	Aqu2.1.13289_001	0	+	1076
Contig12267	134	641	Contig12267	871	872	Aqu2.1.13290_001	0	+	231
Contig12272	8577	8831	Contig12272	11902	11903	Aqu2.1.13315_001	0	+	3072
Contig12275	6441	7155	Contig12275	5831	5832	Aqu2.1.13325_001	0	-	610
Contig12284	7061	7363	Contig12284	8488	8489	Aqu2.1.13375_001	0	-	1126
Contig12290	2335	3179	Contig12290	8075	8076	Aqu2.1.13412_001	0	-	4897
Contig12307	13360	13700	Contig12307	10900	10901	Aqu2.1.13490_001	0	+	2460
Contig12329	16377	16796	Contig12329	17393	17394	Aqu2.1.13577_001	0	+	598
Contig12348	6513	6870	Contig12348	5783	5784	Aqu2.1.13665_001	0	-	730
Contig12352	8854	9333	Contig12352	10061	10062	Aqu2.1.13680_001	0	-	729
Contig12354	8568	10136	Contig12354	8093	8094	Aqu2.1.13690_001	0	+	475
Contig12361	5626	6526	Contig12361	8770	8771	Aqu2.1.13722_001	0	+	2245
Contig12361	7359	7632	Contig12361	8770	8771	Aqu2.1.13722_001	0	+	1139
Contig12402	122	1284	Contig12402	11187	11188	Aqu2.1.13936_001	0	-	9904
Contig12432	5429	6128	Contig12432	5029	5030	Aqu2.1.14092_001	0	+	400
Contig12434	13317	14120	Contig12434	20134	20135	Aqu2.1.14103_001	0	-	6015
Contig12437	20797	21002	Contig12437	15956	15957	Aqu2.1.14124_001	0	+	4841
Contig12439	5352	5745	Contig12439	716	717	Aqu2.1.14128_001	0	+	4636
Contig12439	9463	10846	Contig12439	13756	13757	Aqu2.1.14129_001	0	-	2911
Contig12465	20482	20827	Contig12465	21591	21592	Aqu2.1.14263_001	0	-	765
Contig12475	6084	6332	Contig12475	7687	7688	Aqu2.1.14321_001	0	+	1356
Contig12475	14465	14673	Contig12475	19855	19856	Aqu2.1.14322_001	0	-	5183
Contig12511	2879	3041	Contig12511	4440	4441	Aqu2.1.14534_001	0	+	1400
Contig12512	17627	17895	Contig12512	16137	16138	Aqu2.1.14546_001	0	-	1490
Contig12517	22251	22919	Contig12517	22001	22002	Aqu2.1.14596_001	0	+	250
Contig12535	7186	7643	Contig12535	3906	3907	Aqu2.1.14696_001	0	+	3280
Contig12542	3419	4689	Contig12542	6207	6208	Aqu2.1.14741_001	0	-	1519
Contig12542	5285	5627	Contig12542	6207	6208	Aqu2.1.14741_001	0	-	581
Contig12548	15248	15818	Contig12548	18052	18053	Aqu2.1.14782_001	0	-	2235
Contig12557	9019	9210	Contig12557	10166	10167	Aqu2.1.14841_001	0	-	957
Contig12558	22675	23397	Contig12558	24368	24369	Aqu2.1.14855_001	0	-	972
Contig12560	16951	17852	Contig12560	12666	12667	Aqu2.1.14863_001	0	-	4285
Contig12569	23380	23884	Contig12569	24305	24306	Aqu2.1.14945_001	0	-	422
Contig12579	24803	25288	Contig12579	21831	21832	Aqu2.1.15019_001	0	+	2972
Contig12605	6326	6502	Contig12605	15987	15988	Aqu2.1.15196_001	0	-	9486
Contig12609	11404	12329	Contig12609	18612	18613	Aqu2.1.15224_001	0	-	6284
Contig12614	21909	22145	Contig12614	26210	26211	Aqu2.1.15261_001	0	+	4066
Contig12625	5559	5840	Contig12625	7428	7429	Aqu2.1.15327_001	0	-	1589
Contig12629	23798	24004	Contig12629	25113	25114	Aqu2.1.15366_001	0	-	1110
Contig12634	104	815	Contig12634	1352	1353	Aqu2.1.15390_001	0	+	538
Contig12642	1597	2583	Contig12642	1333	1334	Aqu2.1.15446_001	0	+	264
Contig12642	6745	7105	Contig12642	1333	1334	Aqu2.1.15446_001	0	+	5412
Contig12645	16133	16577	Contig12645	20535	20536	Aqu2.1.15465_001	0	-	3959
Contig12650	16197	16446	Contig12650	13431	13432	Aqu2.1.15505_001	0	-	2766
Contig12666	21850	22525	Contig12666	23668	23669	Aqu2.1.15611_001	0	+	1144
Contig12666	24305	24562	Contig12666	23668	23669	Aqu2.1.15611_001	0	+	637
Contig12667	12101	12324	Contig12667	10460	10461	Aqu2.1.15617_001	0	-	1641
Contig12671	24300	25082	Contig12671	19581	19582	Aqu2.1.15646_001	0	+	4719
Contig12671	25783	26873	Contig12671	19581	19582	Aqu2.1.15646_001	0	+	6202
Contig12672	1876	2575	Contig12672	269	270	Aqu2.1.15647_001	0	+	1607
Contig12673	8281	8661	Contig12673	7917	7918	Aqu2.1.15652_001	0	+	364
Contig12673	16534	16715	Contig12673	16962	16963	Aqu2.1.15653_001	0	+	248
Contig12674	30684	31285	Contig12674	28143	28144	Aqu2.1.15662_001	0	+	2541
Contig12676	418	576	Contig12676	7790	7791	Aqu2.1.15668_001	0	-	7215
Contig12676	12166	12340	Contig12676	13023	13024	Aqu2.1.15670_001	0	+	684
Contig12676	15722	16187	Contig12676	13023	13024	Aqu2.1.15670_001	0	+	2699
Contig12685	16873	17712	Contig12685	18878	18879	Aqu2.1.15737_001	0	-	1167
Contig12695	30785	30946	Contig12695	27163	27164	Aqu2.1.15814_001	0	+	3622
Contig12696	30698	30929	Contig12696	28466	28467	Aqu2.1.15827_001	0	+	2232
Contig12696	30698	30929	Contig12696	28466	28467	Aqu2.1.15828_001	0	+	2232
Contig12696	30698	30929	Contig12696	28466	28467	Aqu2.1.15829_001	0	+	2232
Contig12696	30698	30929	Contig12696	28466	28467	Aqu2.1.15830_001	0	+	2232
Contig12698	24700	25755	Contig12698	24138	24139	Aqu2.1.15847_001	0	+	562
Contig12700	13703	15430	Contig12700	18109	18110	Aqu2.1.15859_001	0	-	2680
Contig12708	13380	14152	Contig12708	9610	9611	Aqu2.1.15944_001	0	+	3770
Contig12708	17357	17789	Contig12708	20435	20436	Aqu2.1.15945_001	0	+	2647
Contig12708	33247	33834	Contig12708	34250	34251	Aqu2.1.15949_001	0	-	417
Contig12709	13094	13246	Contig12709	16134	16135	Aqu2.1.15954_001	0	-	2889
Contig12710	16917	17166	Contig12710	18012	18013	Aqu2.1.15963_001	0	+	847
Contig12714	22769	22974	Contig12714	28052	28053	Aqu2.1.15996_001	0	-	5079
Contig12716	20597	20916	Contig12716	21988	21989	Aqu2.1.16016_001	0	+	1073
Contig12723	185	845	Contig12723	14505	14506	Aqu2.1.16079_001	0	-	13661
Contig12723	1739	1885	Contig12723	14505	14506	Aqu2.1.16079_001	0	-	12621
Contig12723	28410	28752	Contig12723	30000	30001	Aqu2.1.16085_001	0	+	1249
Contig12740	24259	24515	Contig12740	23344	23345	Aqu2.1.16247_001	0	+	915
Contig12760	35760	35995	Contig12760	37722	37723	Aqu2.1.16443_001	0	-	1728
Contig12761	20424	20874	Contig12761	19832	19833	Aqu2.1.16450_001	0	+	592
Contig12765	34501	36110	Contig12765	33970	33971	Aqu2.1.16484_001	0	-	531
Contig12765	34501	36110	Contig12765	33970	33971	Aqu2.1.16485_001	0	-	531
Contig12769	25414	26488	Contig12769	27985	27986	Aqu2.1.16533_001	0	-	1498
Contig12769	31002	31725	Contig12769	34599	34600	Aqu2.1.16534_001	0	-	2875
Contig12771	16967	17368	Contig12771	14379	14380	Aqu2.1.16542_001	0	+	2588
Contig12773	6036	6420	Contig12773	6878	6879	Aqu2.1.16567_001	0	+	459
Contig12777	23044	23250	Contig12777	30732	30733	Aqu2.1.16593_001	0	+	7483
Contig12780	1572	2561	Contig12780	881	882	Aqu2.1.16617_001	0	+	691
Contig12780	4276	4542	Contig12780	881	882	Aqu2.1.16617_001	0	+	3395
Contig12780	6429	6652	Contig12780	881	882	Aqu2.1.16617_001	0	+	5548
Contig12780	7489	8300	Contig12780	881	882	Aqu2.1.16617_001	0	+	6608
Contig12780	18964	19560	Contig12780	17210	17211	Aqu2.1.16618_001	0	+	1754
Contig12784	29105	29534	Contig12784	24249	24250	Aqu2.1.16672_001	0	+	4856
Contig12786	6796	6953	Contig12786	5360	5361	Aqu2.1.16689_001	0	+	1436
Contig12786	29317	30608	Contig12786	27098	27099	Aqu2.1.16694_001	0	-	2219
Contig12789	30235	30558	Contig12789	35755	35756	Aqu2.1.16734_001	0	+	5198
Contig12789	32115	33042	Contig12789	35755	35756	Aqu2.1.16734_001	0	+	2714
Contig12790	25971	26402	Contig12790	29809	29810	Aqu2.1.16743_001	0	+	3408
Contig12792	6502	6838	Contig12792	8542	8543	Aqu2.1.16769_001	0	+	1705
Contig12792	15500	17642	Contig12792	11120	11121	Aqu2.1.16770_001	0	+	4380
Contig12792	18316	19848	Contig12792	23428	23429	Aqu2.1.16771_001	0	+	3581
Contig12798	24975	26389	Contig12798	27264	27265	Aqu2.1.16832_001	0	+	876
Contig12798	33531	33795	Contig12798	32146	32147	Aqu2.1.16833_001	0	-	1385
Contig12800	12147	12642	Contig12800	17858	17859	Aqu2.1.16847_001	0	+	5217
Contig12800	13533	14263	Contig12800	17858	17859	Aqu2.1.16847_001	0	+	3596
Contig12803	476	657	Contig12803	26	27	Aqu2.1.16866_001	0	+	450
Contig12813	34567	35058	Contig12813	32189	32190	Aqu2.1.16958_001	0	-	2378
Contig12817	9743	9901	Contig12817	16052	16053	Aqu2.1.16998_001	0	-	6152
Contig12820	12483	12833	Contig12820	15376	15377	Aqu2.1.17034_001	0	-	2544
Contig12820	34810	36057	Contig12820	33963	33964	Aqu2.1.17045_001	0	-	847
Contig12821	5289	6182	Contig12821	6482	6483	Aqu2.1.17050_001	0	+	301
Contig12829	44495	44676	Contig12829	40089	40090	Aqu2.1.17110_001	0	+	4406
Contig12835	41152	41825	Contig12835	37333	37334	Aqu2.1.17164_001	0	+	3819
Contig12845	36256	36420	Contig12845	36967	36968	Aqu2.1.17231_001	0	-	548
Contig12847	12319	12539	Contig12847	13083	13084	Aqu2.1.17252_001	0	-	545
Contig12849	15586	15932	Contig12849	28962	28963	Aqu2.1.17272_001	0	+	13031
Contig12849	18586	19070	Contig12849	28962	28963	Aqu2.1.17272_001	0	+	9893
Contig12849	32535	32890	Contig12849	36114	36115	Aqu2.1.17273_001	0	+	3225
Contig12850	4881	5798	Contig12850	4611	4612	Aqu2.1.17276_001	0	+	270
Contig12850	23115	23416	Contig12850	19659	19660	Aqu2.1.17280_001	0	+	3456
Contig12850	33520	34443	Contig12850	32756	32757	Aqu2.1.17285_001	0	+	764
Contig12851	34455	34996	Contig12851	35919	35920	Aqu2.1.17293_001	0	-	924
Contig12853	13619	14243	Contig12853	12776	12777	Aqu2.1.17318_001	0	+	843
Contig12854	1147	1360	Contig12854	26	27	Aqu2.1.17322_001	0	+	1121
Contig12856	16137	16922	Contig12856	18043	18044	Aqu2.1.17342_001	0	+	1122
Contig12856	27678	29327	Contig12856	38196	38197	Aqu2.1.17343_001	0	+	8870
Contig12856	47303	47838	Contig12856	42117	42118	Aqu2.1.17345_001	0	+	5186
Contig12857	19215	19676	Contig12857	16913	16914	Aqu2.1.17349_001	0	-	2302
Contig12857	33285	33533	Contig12857	35301	35302	Aqu2.1.17350_001	0	-	1769
Contig12862	36941	37275	Contig12862	33330	33331	Aqu2.1.17403_001	0	+	3611
Contig12863	18353	18822	Contig12863	21585	21586	Aqu2.1.17409_001	0	+	2764
Contig12864	25825	26921	Contig12864	21293	21294	Aqu2.1.17420_001	0	+	4532
Contig12870	21170	21837	Contig12870	14030	14031	Aqu2.1.17462_001	0	-	7140
Contig12870	31593	32070	Contig12870	41096	41097	Aqu2.1.17463_001	0	-	9027
Contig12875	236	1842	Contig12875	6068	6069	Aqu2.1.17524_001	0	-	4227
Contig12879	4728	5356	Contig12879	3043	3044	Aqu2.1.17564_001	0	+	1685
Contig12879	36806	37303	Contig12879	38897	38898	Aqu2.1.17568_001	0	+	1595
Contig12879	36806	37303	Contig12879	38897	38898	Aqu2.1.17569_001	0	+	1595
Contig12883	13367	13527	Contig12883	14132	14133	Aqu2.1.17602_001	0	+	606
Contig12889	44251	44736	Contig12889	42626	42627	Aqu2.1.17662_001	0	+	1625
Contig12891	29037	29914	Contig12891	25637	25638	Aqu2.1.17684_001	0	+	3400
Contig12891	33864	34847	Contig12891	36280	36281	Aqu2.1.17685_001	0	+	1434
Contig12893	20958	22473	Contig12893	22913	22914	Aqu2.1.17718_001	0	-	441
Contig12895	7293	8073	Contig12895	5434	5435	Aqu2.1.17748_001	0	-	1859
Contig12895	23375	24314	Contig12895	15572	15573	Aqu2.1.17752_001	0	-	7803
Contig12896	10039	11613	Contig12896	14718	14719	Aqu2.1.17760_001	0	+	3106
Contig12896	20857	21284	Contig12896	24716	24717	Aqu2.1.17763_001	0	+	3433
Contig12902	9701	9965	Contig12902	12384	12385	Aqu2.1.17828_001	0	+	2420
Contig12902	47943	48253	Contig12902	47639	47640	Aqu2.1.17840_001	0	-	304
Contig12902	47943	48253	Contig12902	47639	47640	Aqu2.1.17841_001	0	-	304
Contig12910	21995	22843	Contig12910	24025	24026	Aqu2.1.17926_001	0	-	1183
Contig12910	39225	39644	Contig12910	42661	42662	Aqu2.1.17929_001	0	-	3018
Contig12910	47875	49866	Contig12910	47540	47541	Aqu2.1.17930_001	0	+	335
Contig12912	41623	41794	Contig12912	35528	35529	Aqu2.1.17960_001	0	-	6095
Contig12912	42438	43737	Contig12912	48458	48459	Aqu2.1.17962_001	0	+	4722
Contig12912	44391	44540	Contig12912	48458	48459	Aqu2.1.17962_001	0	+	3919
Contig12914	192	1351	Contig12914	1891	1892	Aqu2.1.17973_001	0	+	541
Contig12914	6501	6856	Contig12914	4614	4615	Aqu2.1.17974_001	0	-	1887
Contig12914	25259	25578	Contig12914	21959	21960	Aqu2.1.17978_001	0	+	3300
Contig12914	52998	53424	Contig12914	52158	52159	Aqu2.1.17983_001	0	-	840
Contig12915	16451	16680	Contig12915	31222	31223	Aqu2.1.17985_001	0	-	14543
Contig12917	30670	30832	Contig12917	30337	30338	Aqu2.1.18003_001	0	-	333
Contig12919	1862	2121	Contig12919	328	329	Aqu2.1.18013_001	0	+	1534
Contig12925	22657	23055	Contig12925	18601	18602	Aqu2.1.18074_001	0	-	4056
Contig12926	5467	7092	Contig12926	7968	7969	Aqu2.1.18085_001	0	-	877
Contig12926	13026	13372	Contig12926	15581	15582	Aqu2.1.18089_001	0	-	2210
Contig12926	31203	31666	Contig12926	32745	32746	Aqu2.1.18094_001	0	+	1080
Contig12931	45707	46268	Contig12931	49712	49713	Aqu2.1.18173_001	0	-	3445
Contig12931	47113	47308	Contig12931	49712	49713	Aqu2.1.18173_001	0	-	2405
Contig12932	25096	25772	Contig12932	23602	23603	Aqu2.1.18179_001	0	-	1494
Contig12939	37884	38438	Contig12939	51569	51570	Aqu2.1.18276_001	0	-	13132
Contig12939	39776	39922	Contig12939	51569	51570	Aqu2.1.18276_001	0	-	11648
Contig12939	40794	41095	Contig12939	51569	51570	Aqu2.1.18276_001	0	-	10475
Contig12939	44400	45154	Contig12939	51569	51570	Aqu2.1.18276_001	0	-	6416
Contig12941	191	738	Contig12941	14882	14883	Aqu2.1.18289_001	0	-	14145
Contig12941	31521	31984	Contig12941	34575	34576	Aqu2.1.18292_001	0	+	2592
Contig12942	12528	13446	Contig12942	17954	17955	Aqu2.1.18302_001	0	-	4509
Contig12942	20086	20488	Contig12942	17954	17955	Aqu2.1.18302_001	0	-	2132
Contig12947	50422	51168	Contig12947	48901	48902	Aqu2.1.18357_001	0	+	1521
Contig12949	9166	9832	Contig12949	8888	8889	Aqu2.1.18378_001	0	+	278
Contig12951	43685	44212	Contig12951	46007	46008	Aqu2.1.18415_001	0	+	1796
Contig12955	45247	46488	Contig12955	47356	47357	Aqu2.1.18464_001	0	-	869
Contig12955	48301	48853	Contig12955	47681	47682	Aqu2.1.18465_001	0	+	620
Contig12958	41608	42240	Contig12958	40756	40757	Aqu2.1.18503_001	0	+	852
Contig12958	43617	43828	Contig12958	45967	45968	Aqu2.1.18504_001	0	+	2140
Contig12962	18420	18626	Contig12962	19973	19974	Aqu2.1.18552_001	0	+	1348
Contig12962	44766	45820	Contig12962	44273	44274	Aqu2.1.18556_001	0	+	493
Contig12963	2993	4232	Contig12963	9624	9625	Aqu2.1.18559_001	0	+	5393
Contig12963	27194	27366	Contig12963	28664	28665	Aqu2.1.18564_001	0	-	1299
Contig12964	21312	21841	Contig12964	23039	23040	Aqu2.1.18576_001	0	+	1199
Contig12964	25497	25687	Contig12964	23039	23040	Aqu2.1.18576_001	0	+	2458
Contig12964	34418	35488	Contig12964	36386	36387	Aqu2.1.18577_001	0	+	899
Contig12964	50917	51177	Contig12964	51466	51467	Aqu2.1.18580_001	0	-	290
Contig12968	46788	46960	Contig12968	49230	49231	Aqu2.1.18646_001	0	-	2271
Contig12969	44757	45645	Contig12969	46884	46885	Aqu2.1.18658_001	0	+	1240
Contig12971	27375	27858	Contig12971	27091	27092	Aqu2.1.18686_001	0	+	284
Contig12972	27786	28352	Contig12972	29303	29304	Aqu2.1.18708_001	0	-	952
Contig12972	47973	48957	Contig12972	51852	51853	Aqu2.1.18712_001	0	-	2896
Contig12973	18847	21435	Contig12973	15617	15618	Aqu2.1.18718_001	0	-	3230
Contig12973	22210	23680	Contig12973	15617	15618	Aqu2.1.18718_001	0	-	6593
Contig12974	32688	33235	Contig12974	30606	30607	Aqu2.1.18730_001	0	+	2082
Contig12974	47271	49423	Contig12974	42629	42630	Aqu2.1.18731_001	0	+	4642
Contig12975	5711	7259	Contig12975	2653	2654	Aqu2.1.18734_001	0	-	3058
Contig12975	16386	17430	Contig12975	23626	23627	Aqu2.1.18735_001	0	-	6197
Contig12976	11376	12014	Contig12976	6485	6486	Aqu2.1.18748_001	0	+	4891
Contig12976	44439	44722	Contig12976	55818	55819	Aqu2.1.18752_001	0	+	11097
Contig12977	49386	49595	Contig12977	48586	48587	Aqu2.1.18761_001	0	+	800
Contig12979	58965	59347	Contig12979	48903	48904	Aqu2.1.18784_001	0	+	10062
Contig12980	27137	27283	Contig12980	30383	30384	Aqu2.1.18791_001	0	+	3101
Contig12981	30958	32289	Contig12981	35532	35533	Aqu2.1.18801_001	0	-	3244
Contig12981	38664	39616	Contig12981	38142	38143	Aqu2.1.18802_001	0	+	522
Contig12985	45493	45642	Contig12985	48276	48277	Aqu2.1.18855_001	0	+	2635
Contig12986	27521	28442	Contig12986	21823	21824	Aqu2.1.18862_001	0	-	5698
Contig12986	31020	31189	Contig12986	39494	39495	Aqu2.1.18863_001	0	-	8306
Contig12986	32633	32829	Contig12986	39494	39495	Aqu2.1.18863_001	0	-	6666
Contig12987	47432	47960	Contig12987	44013	44014	Aqu2.1.18876_001	0	+	3419
Contig12987	48556	49168	Contig12987	44013	44014	Aqu2.1.18876_001	0	+	4543
Contig12987	50592	50961	Contig12987	54729	54730	Aqu2.1.18877_001	0	+	3769
Contig12991	23673	24362	Contig12991	21796	21797	Aqu2.1.18916_001	0	-	1877
Contig12991	33452	34054	Contig12991	32290	32291	Aqu2.1.18918_001	0	-	1162
Contig12992	39835	40279	Contig12992	38992	38993	Aqu2.1.18930_001	0	+	843
Contig13000	33338	34331	Contig13000	37973	37974	Aqu2.1.19082_001	0	+	3643
Contig13001	38408	39222	Contig13001	37652	37653	Aqu2.1.19096_001	0	-	756
Contig13006	10198	10436	Contig13006	7173	7174	Aqu2.1.19181_001	0	+	3025
Contig13006	52398	52703	Contig13006	50632	50633	Aqu2.1.19186_001	0	+	1766
Contig13006	52398	52703	Contig13006	50632	50633	Aqu2.1.19187_001	0	+	1766
Contig13007	36347	37306	Contig13007	37880	37881	Aqu2.1.19197_001	0	-	575
Contig13010	32837	34334	Contig13010	31502	31503	Aqu2.1.19236_001	0	-	1335
Contig13010	48694	49345	Contig13010	52410	52411	Aqu2.1.19237_001	0	-	3066
Contig13012	3655	4625	Contig13012	6031	6032	Aqu2.1.19265_001	0	-	1407
Contig13012	5489	5807	Contig13012	6031	6032	Aqu2.1.19265_001	0	-	225
Contig13012	9886	10580	Contig13012	7377	7378	Aqu2.1.19267_001	0	+	2509
Contig13015	16814	17208	Contig13015	13148	13149	Aqu2.1.19336_001	0	+	3666
Contig13015	16814	17208	Contig13015	13148	13149	Aqu2.1.19337_001	0	+	3666
Contig13017	42761	42962	Contig13017	44019	44020	Aqu2.1.19372_001	0	-	1058
Contig13020	20290	20938	Contig13020	22752	22753	Aqu2.1.19436_001	0	-	1815
Contig13020	20290	20938	Contig13020	22752	22753	Aqu2.1.19437_001	0	-	1815
Contig13020	45936	46087	Contig13020	44984	44985	Aqu2.1.19444_001	0	+	952
Contig13024	3373	3952	Contig13024	10106	10107	Aqu2.1.19515_001	0	-	6155
Contig13025	3729	4229	Contig13025	1959	1960	Aqu2.1.19530_001	0	+	1770
Contig13025	18602	18818	Contig13025	13340	13341	Aqu2.1.19532_001	0	+	5262
Contig13025	19423	19722	Contig13025	24346	24347	Aqu2.1.19534_001	0	+	4625
Contig13025	47207	48424	Contig13025	46900	46901	Aqu2.1.19542_001	0	-	307
Contig13025	49353	49866	Contig13025	46900	46901	Aqu2.1.19542_001	0	-	2453
Contig13026	5671	6189	Contig13026	3566	3567	Aqu2.1.19548_001	0	-	2105
Contig13026	14774	15743	Contig13026	22584	22585	Aqu2.1.19550_001	0	+	6842
Contig13027	45231	45435	Contig13027	43282	43283	Aqu2.1.19566_001	0	+	1949
Contig13027	55239	56582	Contig13027	52979	52980	Aqu2.1.19567_001	0	+	2260
Contig13027	65680	66570	Contig13027	64837	64838	Aqu2.1.19570_001	0	-	843
Contig13027	67254	68236	Contig13027	64837	64838	Aqu2.1.19570_001	0	-	2417
Contig13028	65479	65947	Contig13028	64294	64295	Aqu2.1.19577_001	0	-	1185
Contig13031	24299	24735	Contig13031	17115	17116	Aqu2.1.19630_001	0	-	7184
Contig13031	25505	26586	Contig13031	17115	17116	Aqu2.1.19630_001	0	-	8390
Contig13033	17662	18105	Contig13033	15081	15082	Aqu2.1.19686_001	0	+	2581
Contig13033	64570	66582	Contig13033	45872	45873	Aqu2.1.19693_001	0	+	18698
Contig13037	35975	36620	Contig13037	33883	33884	Aqu2.1.19738_001	0	+	2092
Contig13038	15773	15959	Contig13038	18932	18933	Aqu2.1.19751_001	0	-	2974
Contig13038	54909	55233	Contig13038	51036	51037	Aqu2.1.19753_001	0	-	3873
Contig13042	28195	29423	Contig13042	31650	31651	Aqu2.1.19822_001	0	+	2228
Contig13042	30820	31162	Contig13042	31650	31651	Aqu2.1.19822_001	0	+	489
Contig13042	63940	64401	Contig13042	63388	63389	Aqu2.1.19836_001	0	+	552
Contig13046	252	572	Contig13046	9291	9292	Aqu2.1.19900_001	0	-	8720
Contig13046	39753	40396	Contig13046	37501	37502	Aqu2.1.19907_001	0	+	2252
Contig13051	38675	38821	Contig13051	43698	43699	Aqu2.1.19998_001	0	-	4878
Contig13051	58034	58199	Contig13051	55291	55292	Aqu2.1.20004_001	0	-	2743
Contig13053	1229	1937	Contig13053	6012	6013	Aqu2.1.20027_001	0	-	4076
Contig13053	72498	73166	Contig13053	76142	76143	Aqu2.1.20040_001	0	-	2977
Contig13054	46594	48196	Contig13054	49184	49185	Aqu2.1.20056_001	0	+	989
Contig13055	11409	11855	Contig13055	9740	9741	Aqu2.1.20068_001	0	+	1669
Contig13055	71243	71795	Contig13055	71006	71007	Aqu2.1.20073_001	0	+	237
Contig13056	30452	31055	Contig13056	33571	33572	Aqu2.1.20082_001	0	-	2517
Contig13056	76660	76845	Contig13056	73654	73655	Aqu2.1.20092_001	0	-	3006
Contig13057	23768	24921	Contig13057	22801	22802	Aqu2.1.20101_001	0	+	967
Contig13061	66033	66523	Contig13061	67586	67587	Aqu2.1.20189_001	0	-	1064
Contig13063	7575	9101	Contig13063	9963	9964	Aqu2.1.20209_001	0	-	863
Contig13063	30441	31461	Contig13063	33047	33048	Aqu2.1.20215_001	0	+	1587
Contig13066	78066	78500	Contig13066	76033	76034	Aqu2.1.20301_001	0	-	2033
Contig13068	10249	10782	Contig13068	9480	9481	Aqu2.1.20323_001	0	-	769
Contig13068	34928	35363	Contig13068	36822	36823	Aqu2.1.20333_001	0	-	1460
Contig13068	43589	44893	Contig13068	45221	45222	Aqu2.1.20336_001	0	+	329
Contig13069	20341	20506	Contig13069	13355	13356	Aqu2.1.20355_001	0	+	6986
Contig13069	21271	22179	Contig13069	13355	13356	Aqu2.1.20355_001	0	+	7916
Contig13072	80140	80312	Contig13072	76140	76141	Aqu2.1.20441_001	0	+	4000
Contig13075	37328	37693	Contig13075	38920	38921	Aqu2.1.20503_001	0	-	1228
Contig13076	9651	10146	Contig13076	7586	7587	Aqu2.1.20525_001	0	-	2065
Contig13077	13688	14249	Contig13077	19912	19913	Aqu2.1.20538_001	0	+	5664
Contig13077	23572	24991	Contig13077	26308	26309	Aqu2.1.20540_001	0	+	1318
Contig13077	51659	53650	Contig13077	54760	54761	Aqu2.1.20544_001	0	-	1111
Contig13077	62428	63035	Contig13077	62205	62206	Aqu2.1.20546_001	0	-	223
Contig13077	76168	76756	Contig13077	69605	69606	Aqu2.1.20552_001	0	+	6563
Contig13078	40134	40332	Contig13078	39256	39257	Aqu2.1.20559_001	0	+	878
Contig13080	20761	21081	Contig13080	22363	22364	Aqu2.1.20603_001	0	+	1283
Contig13083	79884	80129	Contig13083	73931	73932	Aqu2.1.20655_001	0	+	5953
Contig13084	23175	23429	Contig13084	20113	20114	Aqu2.1.20668_001	0	+	3062
Contig13085	40778	41458	Contig13085	48445	48446	Aqu2.1.20690_001	0	-	6988
Contig13085	40778	41458	Contig13085	48445	48446	Aqu2.1.20691_001	0	-	6988
Contig13085	55959	56855	Contig13085	54436	54437	Aqu2.1.20694_001	0	+	1523
Contig13085	60946	61285	Contig13085	54436	54437	Aqu2.1.20694_001	0	+	6510
Contig13085	63353	63555	Contig13085	54436	54437	Aqu2.1.20694_001	0	+	8917
Contig13087	37952	38538	Contig13087	37427	37428	Aqu2.1.20720_001	0	-	525
Contig13087	62516	63141	Contig13087	65524	65525	Aqu2.1.20730_001	0	-	2384
Contig13087	78867	79212	Contig13087	80235	80236	Aqu2.1.20735_001	0	-	1024
Contig13090	45871	46181	Contig13090	44689	44690	Aqu2.1.20793_001	0	+	1182
Contig13090	84612	84765	Contig13090	83540	83541	Aqu2.1.20806_001	0	-	1072
Contig13092	31408	32174	Contig13092	33085	33086	Aqu2.1.20840_001	0	-	912
Contig13092	60971	61359	Contig13092	59706	59707	Aqu2.1.20848_001	0	+	1265
Contig13092	76397	76575	Contig13092	80417	80418	Aqu2.1.20852_001	0	-	3843
Contig13095	19038	19444	Contig13095	14936	14937	Aqu2.1.20885_001	0	+	4102
Contig13095	46308	46472	Contig13095	45340	45341	Aqu2.1.20890_001	0	+	968
Contig13099	49361	51152	Contig13099	47559	47560	Aqu2.1.20972_001	0	+	1802
Contig13099	52523	53037	Contig13099	53323	53324	Aqu2.1.20973_001	0	-	287
Contig13101	49734	51344	Contig13101	52318	52319	Aqu2.1.21018_001	0	+	975
Contig13101	77577	77929	Contig13101	75721	75722	Aqu2.1.21024_001	0	+	1856
Contig13101	85276	85804	Contig13101	86544	86545	Aqu2.1.21027_001	0	-	741
Contig13103	3747	4457	Contig13103	4688	4689	Aqu2.1.21047_001	0	+	232
Contig13103	12092	12891	Contig13103	9418	9419	Aqu2.1.21048_001	0	+	2674
Contig13103	13692	14490	Contig13103	17764	17765	Aqu2.1.21050_001	0	+	3275
Contig13103	16510	17223	Contig13103	17764	17765	Aqu2.1.21050_001	0	+	542
Contig13103	83598	84126	Contig13103	78584	78585	Aqu2.1.21065_001	0	+	5014
Contig13104	20475	20920	Contig13104	15507	15508	Aqu2.1.21069_001	0	-	4968
Contig13104	21635	23448	Contig13104	26558	26559	Aqu2.1.21070_001	0	-	3111
Contig13104	62235	62501	Contig13104	63318	63319	Aqu2.1.21080_001	0	-	818
Contig13105	2841	3032	Contig13105	6228	6229	Aqu2.1.21089_001	0	+	3197
Contig13105	13548	13746	Contig13105	11915	11916	Aqu2.1.21091_001	0	+	1633
Contig13108	31559	31771	Contig13108	30152	30153	Aqu2.1.21167_001	0	+	1407
Contig13108	34081	34291	Contig13108	34729	34730	Aqu2.1.21164_001	0	-	439
Contig13109	33874	35408	Contig13109	31114	31115	Aqu2.1.21200_001	0	+	2760
Contig13109	37191	37685	Contig13109	39579	39580	Aqu2.1.21201_001	0	-	1895
Contig13110	3965	4429	Contig13110	183	184	Aqu2.1.21212_001	0	+	3782
Contig13110	20444	20997	Contig13110	21486	21487	Aqu2.1.21216_001	0	+	490
Contig13110	46736	48429	Contig13110	45863	45864	Aqu2.1.21229_001	0	+	873
Contig13110	49678	50558	Contig13110	51591	51592	Aqu2.1.21230_001	0	+	1034
Contig13110	53122	53692	Contig13110	55086	55087	Aqu2.1.21231_001	0	+	1395
Contig13110	67986	68155	Contig13110	68833	68834	Aqu2.1.21235_001	0	-	679
Contig13110	84978	85853	Contig13110	84577	84578	Aqu2.1.21241_001	0	-	401
Contig13111	53757	53950	Contig13111	50032	50033	Aqu2.1.21260_001	0	+	3725
Contig13111	57373	58094	Contig13111	63157	63158	Aqu2.1.21261_001	0	+	5064
Contig13111	60857	61165	Contig13111	63157	63158	Aqu2.1.21261_001	0	+	1993
Contig13111	64461	64907	Contig13111	63157	63158	Aqu2.1.21261_001	0	+	1304
Contig13111	88553	89020	Contig13111	89679	89680	Aqu2.1.21268_001	0	+	660
Contig13114	89581	90023	Contig13114	86074	86075	Aqu2.1.21357_001	0	+	3507
Contig13114	89581	90023	Contig13114	86074	86075	Aqu2.1.21358_001	0	+	3507
Contig13118	22612	23281	Contig13118	20698	20699	Aqu2.1.21429_001	0	+	1914
Contig13118	44120	45154	Contig13118	45581	45582	Aqu2.1.21431_001	0	-	428
Contig13119	40736	41180	Contig13119	38269	38270	Aqu2.1.21444_001	0	-	2467
Contig13120	30017	31791	Contig13120	35041	35042	Aqu2.1.21460_001	0	+	3251
Contig13121	185	1364	Contig13121	2622	2623	Aqu2.1.21475_001	0	+	1259
Contig13121	4168	4387	Contig13121	2622	2623	Aqu2.1.21475_001	0	+	1546
Contig13121	14714	14927	Contig13121	16115	16116	Aqu2.1.21476_001	0	-	1189
Contig13122	28532	28691	Contig13122	23320	23321	Aqu2.1.21509_001	0	+	5212
Contig13122	40795	41121	Contig13122	39764	39765	Aqu2.1.21511_001	0	+	1031
Contig13123	46407	47225	Contig13123	49813	49814	Aqu2.1.21523_001	0	+	2589
Contig13123	93331	93704	Contig13123	87590	87591	Aqu2.1.21528_001	0	+	5741
Contig13124	38188	39179	Contig13124	58632	58633	Aqu2.1.21532_001	0	+	19454
Contig13124	51813	52396	Contig13124	58632	58633	Aqu2.1.21532_001	0	+	6237
Contig13124	53525	55101	Contig13124	58632	58633	Aqu2.1.21532_001	0	+	3532
Contig13124	74819	75015	Contig13124	68313	68314	Aqu2.1.21534_001	0	+	6506
Contig13124	79922	80398	Contig13124	82735	82736	Aqu2.1.21531_001	0	-	2338
Contig13124	85325	86706	Contig13124	87774	87775	Aqu2.1.21535_001	0	+	1069
Contig13125	62078	62640	Contig13125	56364	56365	Aqu2.1.21549_001	0	-	5714
Contig13125	74426	75514	Contig13125	77304	77305	Aqu2.1.21552_001	0	-	1791
Contig13126	17939	18941	Contig13126	20186	20187	Aqu2.1.21566_001	0	-	1246
Contig13126	26470	27023	Contig13126	27998	27999	Aqu2.1.21570_001	0	-	976
Contig13130	65574	65790	Contig13130	73005	73006	Aqu2.1.21651_001	0	-	7216
Contig13130	82293	82641	Contig13130	77553	77554	Aqu2.1.21655_001	0	-	4740
Contig13131	60	270	Contig13131	984	985	Aqu2.1.21658_001	0	+	715
Contig13131	44344	44529	Contig13131	38001	38002	Aqu2.1.21683_001	0	+	6343
Contig13131	76421	77956	Contig13131	73080	73081	Aqu2.1.21689_001	0	+	3341
Contig13133	11178	12538	Contig13133	10279	10280	Aqu2.1.21723_001	0	-	899
Contig13133	16993	18030	Contig13133	15918	15919	Aqu2.1.21725_001	0	+	1075
Contig13134	22459	23398	Contig13134	13337	13338	Aqu2.1.21742_001	0	+	9122
Contig13134	70191	70522	Contig13134	74045	74046	Aqu2.1.21746_001	0	+	3524
Contig13135	28889	29401	Contig13135	28296	28297	Aqu2.1.21756_001	0	-	593
Contig13135	63253	63872	Contig13135	66347	66348	Aqu2.1.21765_001	0	-	2476
Contig13135	73937	74578	Contig13135	81674	81675	Aqu2.1.21767_001	0	-	7097
Contig13136	27389	30207	Contig13136	23241	23242	Aqu2.1.21774_001	0	+	4148
Contig13136	95671	96155	Contig13136	95193	95194	Aqu2.1.21786_001	0	+	478
Contig13138	38620	39535	Contig13138	47694	47695	Aqu2.1.21824_001	0	+	8160
Contig13138	41249	41632	Contig13138	47694	47695	Aqu2.1.21824_001	0	+	6063
Contig13138	43993	44157	Contig13138	47694	47695	Aqu2.1.21824_001	0	+	3538
Contig13138	45616	46073	Contig13138	47694	47695	Aqu2.1.21824_001	0	+	1622
Contig13140	11539	12700	Contig13140	10644	10645	Aqu2.1.21876_001	0	-	895
Contig13140	41651	41893	Contig13140	41366	41367	Aqu2.1.21885_001	0	+	285
Contig13140	81405	81989	Contig13140	82719	82720	Aqu2.1.21895_001	0	+	731
Contig13141	16224	16376	Contig13141	19598	19599	Aqu2.1.21903_001	0	+	3223
Contig13141	37295	37455	Contig13141	47757	47758	Aqu2.1.21905_001	0	+	10303
Contig13142	55888	56322	Contig13142	51130	51131	Aqu2.1.21927_001	0	+	4758
Contig13148	20823	21059	Contig13148	22878	22879	Aqu2.1.22047_001	0	-	1820
Contig13148	36056	36436	Contig13148	36853	36854	Aqu2.1.22050_001	0	-	418
Contig13149	48186	48366	Contig13149	48682	48683	Aqu2.1.22073_001	0	+	317
Contig13150	67162	67893	Contig13150	69526	69527	Aqu2.1.22096_001	0	-	1634
Contig13150	75769	77534	Contig13150	78701	78702	Aqu2.1.22099_001	0	-	1168
Contig13152	54672	54921	Contig13152	56551	56552	Aqu2.1.22142_001	0	+	1631
Contig13153	41002	41659	Contig13153	32872	32873	Aqu2.1.22161_001	0	+	8130
Contig13153	52180	52365	Contig13153	51763	51764	Aqu2.1.22163_001	0	+	417
Contig13155	647	1108	Contig13155	1661	1662	Aqu2.1.22199_001	0	-	554
Contig13155	2720	4079	Contig13155	4574	4575	Aqu2.1.22200_001	0	-	496
Contig13155	38731	39431	Contig13155	38489	38490	Aqu2.1.22203_001	0	-	242
Contig13157	19939	20357	Contig13157	22000	22001	Aqu2.1.22236_001	0	-	1644
Contig13157	32085	32529	Contig13157	32781	32782	Aqu2.1.22242_001	0	-	253
Contig13158	66206	66826	Contig13158	65169	65170	Aqu2.1.22279_001	0	-	1037
Contig13158	88552	89270	Contig13158	90591	90592	Aqu2.1.22281_001	0	-	1322
Contig13158	92936	93181	Contig13158	90591	90592	Aqu2.1.22281_001	0	-	2345
Contig13158	99308	99841	Contig13158	102141	102142	Aqu2.1.22282_001	0	-	2301
Contig13160	20427	21238	Contig13160	17014	17015	Aqu2.1.22303_001	0	+	3413
Contig13160	40819	40965	Contig13160	46384	46385	Aqu2.1.22305_001	0	+	5420
Contig13160	76149	78514	Contig13160	75423	75424	Aqu2.1.22313_001	0	+	726
Contig13161	23727	23907	Contig13161	28472	28473	Aqu2.1.22322_001	0	+	4566
Contig13161	31698	32035	Contig13161	31019	31020	Aqu2.1.22325_001	0	+	679
Contig13161	79543	80992	Contig13161	87378	87379	Aqu2.1.22335_001	0	+	6387
Contig13161	83995	85731	Contig13161	87378	87379	Aqu2.1.22335_001	0	+	1648
Contig13164	46220	46518	Contig13164	43996	43997	Aqu2.1.22403_001	0	+	2224
Contig13164	65046	65503	Contig13164	66009	66010	Aqu2.1.22405_001	0	+	507
Contig13167	26545	27049	Contig13167	31392	31393	Aqu2.1.22476_001	0	-	4344
Contig13167	27812	27977	Contig13167	31392	31393	Aqu2.1.22476_001	0	-	3416
Contig13168	7897	8053	Contig13168	6941	6942	Aqu2.1.22494_001	0	-	956
Contig13168	37904	38152	Contig13168	40321	40322	Aqu2.1.22496_001	0	+	2170
Contig13170	60654	61346	Contig13170	59369	59370	Aqu2.1.22556_001	0	+	1285
Contig13171	12854	13356	Contig13171	11010	11011	Aqu2.1.22574_001	0	-	1844
Contig13171	59192	59623	Contig13171	60377	60378	Aqu2.1.22591_001	0	+	755
Contig13173	52851	53454	Contig13173	50819	50820	Aqu2.1.22647_001	0	-	2032
Contig13173	54319	54816	Contig13173	56363	56364	Aqu2.1.22648_001	0	-	1548
Contig13174	12148	12801	Contig13174	14036	14037	Aqu2.1.22662_001	0	-	1236
Contig13174	62651	63171	Contig13174	64106	64107	Aqu2.1.22672_001	0	+	936
Contig13175	47976	48498	Contig13175	46541	46542	Aqu2.1.22699_001	0	-	1435
Contig13175	66443	66937	Contig13175	63838	63839	Aqu2.1.22704_001	0	+	2605
Contig13175	81903	83135	Contig13175	84192	84193	Aqu2.1.22710_001	0	+	1058
Contig13175	87496	88146	Contig13175	85508	85509	Aqu2.1.22711_001	0	+	1988
Contig13179	13801	14220	Contig13179	12071	12072	Aqu2.1.22822_001	0	+	1730
Contig13179	17138	17627	Contig13179	12071	12072	Aqu2.1.22822_001	0	+	5067
Contig13183	25060	25811	Contig13183	24565	24566	Aqu2.1.22926_001	0	-	495
Contig13185	81682	82479	Contig13185	79176	79177	Aqu2.1.23006_001	0	+	2506
Contig13187	1360	2627	Contig13187	63	64	Aqu2.1.23050_001	0	+	1297
Contig13191	69945	70203	Contig13191	70994	70995	Aqu2.1.23216_001	0	-	792
Contig13191	75921	76498	Contig13191	70994	70995	Aqu2.1.23216_001	0	-	4927
Contig13191	78388	79286	Contig13191	70994	70995	Aqu2.1.23216_001	0	-	7394
Contig13191	82014	83443	Contig13191	87987	87988	Aqu2.1.23214_001	0	-	4545
Contig13192	18181	18441	Contig13192	17540	17541	Aqu2.1.23226_001	0	+	641
Contig13192	105723	106453	Contig13192	104106	104107	Aqu2.1.23251_001	0	-	1617
Contig13194	89846	90013	Contig13194	88717	88718	Aqu2.1.23313_001	0	+	1129
Contig13194	97330	97704	Contig13194	100495	100496	Aqu2.1.23314_001	0	-	2792
Contig13194	99094	99846	Contig13194	100495	100496	Aqu2.1.23314_001	0	-	650
Contig13195	1664	2857	Contig13195	3245	3246	Aqu2.1.23321_001	0	+	389
Contig13195	9233	10203	Contig13195	3665	3666	Aqu2.1.23322_001	0	+	5568
Contig13195	108800	109032	Contig13195	110427	110428	Aqu2.1.23346_001	0	+	1396
Contig13196	27883	28856	Contig13196	23378	23379	Aqu2.1.23353_001	0	+	4505
Contig13196	32884	33580	Contig13196	34715	34716	Aqu2.1.23354_001	0	+	1136
Contig13197	59210	60587	Contig13197	60863	60864	Aqu2.1.23391_001	0	+	277
Contig13197	93810	94040	Contig13197	96132	96133	Aqu2.1.23395_001	0	+	2093
Contig13198	34138	34635	Contig13198	36500	36501	Aqu2.1.23410_001	0	-	1866
Contig13198	37274	37702	Contig13198	36500	36501	Aqu2.1.23410_001	0	-	774
Contig13198	92466	92818	Contig13198	90091	90092	Aqu2.1.23426_001	0	+	2375
Contig13199	111747	112168	Contig13199	114189	114190	Aqu2.1.23465_001	0	-	2022
Contig13203	95394	95986	Contig13203	94077	94078	Aqu2.1.23567_001	0	+	1317
Contig13203	111601	112297	Contig13203	113425	113426	Aqu2.1.23573_001	0	+	1129
Contig13204	10882	11061	Contig13204	7237	7238	Aqu2.1.23575_001	0	+	3645
Contig13204	57279	57675	Contig13204	57067	57068	Aqu2.1.23587_001	0	-	212
Contig13206	21298	21477	Contig13206	25965	25966	Aqu2.1.23634_001	0	-	4489
Contig13208	91742	91944	Contig13208	92418	92419	Aqu2.1.23696_001	0	-	475
Contig13209	11549	11819	Contig13209	12878	12879	Aqu2.1.23707_001	0	-	1060
Contig13209	19901	20301	Contig13209	21546	21547	Aqu2.1.23709_001	0	-	1246
Contig13209	62891	63424	Contig13209	64500	64501	Aqu2.1.23718_001	0	-	1077
Contig13209	83918	84138	Contig13209	84458	84459	Aqu2.1.23720_001	0	-	321
Contig13209	118117	118288	Contig13209	91897	91898	Aqu2.1.23722_001	0	+	26220
Contig13210	1006	1533	Contig13210	5722	5723	Aqu2.1.23723_001	0	-	4190
Contig13210	10538	10700	Contig13210	9681	9682	Aqu2.1.23725_001	0	+	857
Contig13212	1785	2257	Contig13212	12598	12599	Aqu2.1.23799_001	0	+	10342
Contig13212	44091	44256	Contig13212	48196	48197	Aqu2.1.23804_001	0	+	3941
Contig13212	64373	64910	Contig13212	65928	65929	Aqu2.1.23810_001	0	+	1019
Contig13213	1192	1682	Contig13213	2082	2083	Aqu2.1.23829_001	0	+	401
Contig13213	105370	106485	Contig13213	109221	109222	Aqu2.1.23858_001	0	-	2737
Contig13214	16461	16811	Contig13214	14009	14010	Aqu2.1.23866_001	0	-	2452
Contig13214	22654	23173	Contig13214	21660	21661	Aqu2.1.23869_001	0	+	994
Contig13214	27849	28378	Contig13214	31464	31465	Aqu2.1.23870_001	0	-	3087
Contig13214	100896	101940	Contig13214	94246	94247	Aqu2.1.23893_001	0	+	6650
Contig13217	15517	16019	Contig13217	13220	13221	Aqu2.1.23939_001	0	-	2297
Contig13217	58087	58889	Contig13217	57065	57066	Aqu2.1.23952_001	0	+	1022
Contig13217	113700	114738	Contig13217	115085	115086	Aqu2.1.23969_001	0	-	348
Contig13217	118934	120179	Contig13217	115143	115144	Aqu2.1.23970_001	0	+	3791
Contig13218	18183	18988	Contig13218	16765	16766	Aqu2.1.23972_001	0	-	1418
Contig13218	32519	32665	Contig13218	33459	33460	Aqu2.1.23978_001	0	+	795
Contig13218	116346	117748	Contig13218	114837	114838	Aqu2.1.23993_001	0	-	1509
Contig13219	73425	73860	Contig13219	71533	71534	Aqu2.1.24006_001	0	+	1892
Contig13219	106164	106390	Contig13219	107680	107681	Aqu2.1.24008_001	0	-	1291
Contig13220	30964	31197	Contig13220	29180	29181	Aqu2.1.24025_001	0	-	1784
Contig13220	112437	112774	Contig13220	110311	110312	Aqu2.1.24041_001	0	-	2126
Contig13221	112584	113143	Contig13221	120301	120302	Aqu2.1.24060_001	0	+	7159
Contig13222	50033	50341	Contig13222	47811	47812	Aqu2.1.24070_001	0	+	2222
Contig13222	106437	106719	Contig13222	111021	111022	Aqu2.1.24077_001	0	-	4303
Contig13224	16838	17080	Contig13224	13498	13499	Aqu2.1.24119_001	0	+	3340
Contig13224	54681	54854	Contig13224	59891	59892	Aqu2.1.24130_001	0	+	5038
Contig13225	49222	49673	Contig13225	47943	47944	Aqu2.1.24153_001	0	+	1279
Contig13225	98380	98672	Contig13225	97806	97807	Aqu2.1.24165_001	0	+	574
Contig13225	107913	110153	Contig13225	113311	113312	Aqu2.1.24170_001	0	+	3159
Contig13226	43543	43898	Contig13226	44857	44858	Aqu2.1.24181_001	0	-	960
Contig13226	92500	92739	Contig13226	93907	93908	Aqu2.1.24199_001	0	-	1169
Contig13227	82612	83412	Contig13227	82177	82178	Aqu2.1.24238_001	0	+	435
Contig13227	91098	92235	Contig13227	90269	90270	Aqu2.1.24245_001	0	+	829
Contig13229	89582	90143	Contig13229	92573	92574	Aqu2.1.24308_001	0	-	2431
Contig13229	93312	94608	Contig13229	92763	92764	Aqu2.1.24311_001	0	+	549
Contig13229	99278	99876	Contig13229	98107	98108	Aqu2.1.24312_001	0	+	1171
Contig13229	115013	115765	Contig13229	110294	110295	Aqu2.1.24315_001	0	+	4719
Contig13230	53792	54018	Contig13230	54646	54647	Aqu2.1.24326_001	0	+	629
Contig13230	60578	60975	Contig13230	59157	59158	Aqu2.1.24327_001	0	-	1421
Contig13231	27338	28469	Contig13231	29808	29809	Aqu2.1.24358_001	0	+	1340
Contig13231	98232	99647	Contig13231	100836	100837	Aqu2.1.24372_001	0	+	1190
Contig13231	118114	118302	Contig13231	114887	114888	Aqu2.1.24377_001	0	-	3227
Contig13232	52129	53052	Contig13232	61220	61221	Aqu2.1.24388_001	0	-	8169
Contig13233	35231	35434	Contig13233	34355	34356	Aqu2.1.24425_001	0	-	876
Contig13233	44270	44572	Contig13233	37140	37141	Aqu2.1.24427_001	0	-	7130
Contig13234	2795	3354	Contig13234	1746	1747	Aqu2.1.24443_001	0	-	1049
Contig13234	4479	6202	Contig13234	1746	1747	Aqu2.1.24443_001	0	-	2733
Contig13234	46679	47648	Contig13234	45400	45401	Aqu2.1.24451_001	0	+	1279
Contig13234	56897	57244	Contig13234	53145	53146	Aqu2.1.24453_001	0	+	3752
Contig13234	122815	123868	Contig13234	119289	119290	Aqu2.1.24470_001	0	-	3526
Contig13234	124553	124775	Contig13234	128101	128102	Aqu2.1.24471_001	0	-	3327
Contig13236	273	1147	Contig13236	3375	3376	Aqu2.1.24487_001	0	-	2229
Contig13236	30618	31197	Contig13236	28810	28811	Aqu2.1.24493_001	0	+	1808
Contig13236	82735	84243	Contig13236	82337	82338	Aqu2.1.24513_001	0	-	398
Contig13236	88454	89028	Contig13236	90905	90906	Aqu2.1.24516_001	0	-	1878
Contig13237	14737	16260	Contig13237	14465	14466	Aqu2.1.24534_001	0	+	272
Contig13237	49785	50265	Contig13237	54487	54488	Aqu2.1.24543_001	0	-	4223
Contig13237	58007	58245	Contig13237	59411	59412	Aqu2.1.24545_001	0	+	1167
Contig13237	88134	88373	Contig13237	89138	89139	Aqu2.1.24554_001	0	-	766
Contig13239	43885	44258	Contig13239	46470	46471	Aqu2.1.24601_001	0	-	2213
Contig13239	81628	82891	Contig13239	86870	86871	Aqu2.1.24613_001	0	-	3980
Contig13239	95740	96158	Contig13239	95447	95448	Aqu2.1.24617_001	0	-	293
Contig13240	32962	34325	Contig13240	40916	40917	Aqu2.1.24632_001	0	+	6592
Contig13240	70501	71600	Contig13240	67681	67682	Aqu2.1.24636_001	0	-	2820
Contig13240	72487	73627	Contig13240	75009	75010	Aqu2.1.24637_001	0	-	1383
Contig13241	40751	41375	Contig13241	37958	37959	Aqu2.1.24655_001	0	-	2793
Contig13241	53297	54128	Contig13241	52536	52537	Aqu2.1.24658_001	0	-	761
Contig13241	57597	57823	Contig13241	56046	56047	Aqu2.1.24660_001	0	+	1551
Contig13242	17931	18127	Contig13242	15716	15717	Aqu2.1.24681_001	0	-	2215
Contig13243	20590	21929	Contig13243	19755	19756	Aqu2.1.24718_001	0	+	835
Contig13243	95831	95988	Contig13243	97631	97632	Aqu2.1.24734_001	0	+	1644
Contig13243	95831	95988	Contig13243	97631	97632	Aqu2.1.24735_001	0	+	1644
Contig13243	129238	129633	Contig13243	126342	126343	Aqu2.1.24739_001	0	-	2896
Contig13243	129238	129633	Contig13243	126342	126343	Aqu2.1.24740_001	0	-	2896
Contig13245	10986	11405	Contig13245	8427	8428	Aqu2.1.24781_001	0	-	2559
Contig13246	37247	38801	Contig13246	36059	36060	Aqu2.1.24816_001	0	-	1188
Contig13246	79953	80409	Contig13246	84690	84691	Aqu2.1.24817_001	0	-	4282
Contig13247	49454	49681	Contig13247	46976	46977	Aqu2.1.24852_001	0	-	2478
Contig13248	98867	99021	Contig13248	99943	99944	Aqu2.1.24900_001	0	+	923
Contig13248	109903	110758	Contig13248	109665	109666	Aqu2.1.24903_001	0	-	238
Contig13249	74783	75725	Contig13249	76671	76672	Aqu2.1.24920_001	0	+	947
Contig13249	83618	84100	Contig13249	79923	79924	Aqu2.1.24921_001	0	+	3695
Contig13249	94998	95522	Contig13249	94382	94383	Aqu2.1.24922_001	0	+	616
Contig13249	97303	98086	Contig13249	100886	100887	Aqu2.1.24923_001	0	+	2801
Contig13249	109108	109315	Contig13249	110517	110518	Aqu2.1.24924_001	0	-	1203
Contig13250	11885	12250	Contig13250	20468	20469	Aqu2.1.24930_001	0	-	8219
Contig13251	66663	66959	Contig13251	65031	65032	Aqu2.1.24981_001	0	+	1632
Contig13251	69174	69499	Contig13251	72135	72136	Aqu2.1.24982_001	0	-	2637
Contig13251	74953	75521	Contig13251	74532	74533	Aqu2.1.24983_001	0	+	421
Contig13251	129081	129269	Contig13251	130578	130579	Aqu2.1.25008_001	0	+	1310
Contig13252	7486	7809	Contig13252	5470	5471	Aqu2.1.25014_001	0	+	2016
Contig13252	20644	20874	Contig13252	25399	25400	Aqu2.1.25015_001	0	-	4526
Contig13252	45898	46408	Contig13252	50064	50065	Aqu2.1.25019_001	0	-	3657
Contig13252	134252	134441	Contig13252	133724	133725	Aqu2.1.25038_001	0	+	528
Contig13253	103674	105488	Contig13253	106715	106716	Aqu2.1.25069_001	0	-	1228
Contig13253	129513	131562	Contig13253	128814	128815	Aqu2.1.25076_001	0	+	699
Contig13254	38068	40417	Contig13254	36004	36005	Aqu2.1.25085_001	0	+	2064
Contig13255	109836	109998	Contig13255	108523	108524	Aqu2.1.25129_001	0	+	1313
Contig13255	115453	115627	Contig13255	114129	114130	Aqu2.1.25130_001	0	+	1324
Contig13255	130740	131185	Contig13255	127876	127877	Aqu2.1.25131_001	0	+	2864
Contig13257	11432	11687	Contig13257	13526	13527	Aqu2.1.25174_001	0	-	1840
Contig13257	26791	28172	Contig13257	30736	30737	Aqu2.1.25178_001	0	+	2565
Contig13257	50236	50674	Contig13257	55066	55067	Aqu2.1.25184_001	0	+	4393
Contig13257	53278	54742	Contig13257	55066	55067	Aqu2.1.25184_001	0	+	325
Contig13257	95174	95416	Contig13257	93995	93996	Aqu2.1.25193_001	0	+	1179
Contig13258	743	1224	Contig13258	2542	2543	Aqu2.1.25204_001	0	-	1319
Contig13258	14661	16510	Contig13258	11840	11841	Aqu2.1.25208_001	0	-	2821
Contig13258	47120	47381	Contig13258	53210	53211	Aqu2.1.25215_001	0	-	5830
Contig13258	59172	59953	Contig13258	63298	63299	Aqu2.1.25210_001	0	-	3346
Contig13258	60961	61114	Contig13258	63298	63299	Aqu2.1.25210_001	0	-	2185
Contig13258	71229	71745	Contig13258	73525	73526	Aqu2.1.25219_001	0	+	1781
Contig13258	80354	80811	Contig13258	78113	78114	Aqu2.1.25221_001	0	+	2241
Contig13258	87875	89264	Contig13258	86058	86059	Aqu2.1.25223_001	0	+	1817
Contig13260	53331	53477	Contig13260	59322	59323	Aqu2.1.25305_001	0	+	5846
Contig13260	106999	107767	Contig13260	106463	106464	Aqu2.1.25318_001	0	+	536
Contig13260	108742	109157	Contig13260	106463	106464	Aqu2.1.25318_001	0	+	2279
Contig13260	123000	124319	Contig13260	121378	121379	Aqu2.1.25321_001	0	+	1622
Contig13261	80746	81307	Contig13261	82826	82827	Aqu2.1.25340_001	0	+	1520
Contig13261	98008	98255	Contig13261	92337	92338	Aqu2.1.25341_001	0	+	5671
Contig13261	113635	113849	Contig13261	115404	115405	Aqu2.1.25342_001	0	+	1556
Contig13263	79728	80674	Contig13263	75586	75587	Aqu2.1.25399_001	0	-	4142
Contig13263	85915	86271	Contig13263	75586	75587	Aqu2.1.25399_001	0	-	10329
Contig13263	90239	90656	Contig13263	98524	98525	Aqu2.1.25400_001	0	-	7869
Contig13263	92252	93020	Contig13263	98524	98525	Aqu2.1.25400_001	0	-	5505
Contig13263	109202	109438	Contig13263	111146	111147	Aqu2.1.25405_001	0	-	1709
Contig13264	115712	116079	Contig13264	120675	120676	Aqu2.1.25455_001	0	-	4597
Contig13265	71048	71738	Contig13265	74009	74010	Aqu2.1.25484_001	0	+	2272
Contig13267	20438	20840	Contig13267	23274	23275	Aqu2.1.25556_001	0	+	2435
Contig13267	22045	22651	Contig13267	23274	23275	Aqu2.1.25556_001	0	+	624
Contig13267	29074	29402	Contig13267	29936	29937	Aqu2.1.25559_001	0	+	535
Contig13267	46529	46838	Contig13267	34070	34071	Aqu2.1.25560_001	0	+	12459
Contig13267	94110	94589	Contig13267	91769	91770	Aqu2.1.25565_001	0	-	2341
Contig13267	97743	99017	Contig13267	99403	99404	Aqu2.1.25567_001	0	-	387
Contig13268	20728	20881	Contig13268	19756	19757	Aqu2.1.25585_001	0	+	972
Contig13268	126095	126511	Contig13268	125711	125712	Aqu2.1.25609_001	0	+	384
Contig13269	51541	51690	Contig13269	52189	52190	Aqu2.1.25623_001	0	-	500
Contig13270	80396	81404	Contig13270	87762	87763	Aqu2.1.25658_001	0	+	6359
Contig13270	132146	132487	Contig13270	130703	130704	Aqu2.1.25667_001	0	-	1443
Contig13271	58065	58334	Contig13271	55406	55407	Aqu2.1.25677_001	0	+	2659
Contig13271	61439	62117	Contig13271	64361	64362	Aqu2.1.25679_001	0	+	2245
Contig13271	87999	88652	Contig13271	87608	87609	Aqu2.1.25685_001	0	-	391
Contig13273	10556	10811	Contig13273	8610	8611	Aqu2.1.25739_001	0	+	1946
Contig13273	40393	40984	Contig13273	41562	41563	Aqu2.1.25751_001	0	-	579
Contig13274	1805	1955	Contig13274	2379	2380	Aqu2.1.25782_001	0	+	425
Contig13274	72368	73671	Contig13274	71298	71299	Aqu2.1.25795_001	0	-	1070
Contig13274	85717	86460	Contig13274	84990	84991	Aqu2.1.25797_001	0	-	727
Contig13274	100754	103295	Contig13274	100231	100232	Aqu2.1.25804_001	0	+	523
Contig13274	105111	105582	Contig13274	107316	107317	Aqu2.1.25805_001	0	-	1735
Contig13274	109122	110009	Contig13274	107316	107317	Aqu2.1.25805_001	0	-	1806
Contig13274	122160	122771	Contig13274	128088	128089	Aqu2.1.25808_001	0	-	5318
Contig13274	124293	124948	Contig13274	128088	128089	Aqu2.1.25808_001	0	-	3141
Contig13275	98134	98429	Contig13275	99544	99545	Aqu2.1.25831_001	0	+	1116
Contig13276	91242	92889	Contig13276	90397	90398	Aqu2.1.25874_001	0	+	845
Contig13276	99706	100249	Contig13276	103044	103045	Aqu2.1.25875_001	0	-	2796
Contig13276	107480	108136	Contig13276	107119	107120	Aqu2.1.25876_001	0	-	361
Contig13277	7632	8527	Contig13277	7389	7390	Aqu2.1.25890_001	0	+	243
Contig13277	34267	34550	Contig13277	35965	35966	Aqu2.1.25894_001	0	-	1416
Contig13277	52412	52642	Contig13277	50857	50858	Aqu2.1.25898_001	0	-	1555
Contig13278	141491	141670	Contig13278	140309	140310	Aqu2.1.25945_001	0	+	1182
Contig13279	94093	94300	Contig13279	92498	92499	Aqu2.1.25964_001	0	-	1595
Contig13281	6903	7248	Contig13281	4363	4364	Aqu2.1.26005_001	0	+	2540
Contig13281	9078	10285	Contig13281	11461	11462	Aqu2.1.26006_001	0	-	1177
Contig13281	44042	44716	Contig13281	41910	41911	Aqu2.1.26013_001	0	+	2132
Contig13281	55608	56766	Contig13281	54755	54756	Aqu2.1.26015_001	0	+	853
Contig13281	57439	57635	Contig13281	58306	58307	Aqu2.1.26016_001	0	+	672
Contig13281	81019	82033	Contig13281	82793	82794	Aqu2.1.26025_001	0	-	761
Contig13283	10951	11815	Contig13283	6053	6054	Aqu2.1.26079_001	0	+	4898
Contig13283	24952	26356	Contig13283	23232	23233	Aqu2.1.26080_001	0	-	1720
Contig13283	83906	84073	Contig13283	84824	84825	Aqu2.1.26090_001	0	-	752
Contig13283	103344	104098	Contig13283	105046	105047	Aqu2.1.26096_001	0	-	949
Contig13284	54788	55368	Contig13284	57563	57564	Aqu2.1.26123_001	0	-	2196
Contig13285	25809	26237	Contig13285	28487	28488	Aqu2.1.26163_001	0	-	2251
Contig13285	33201	34245	Contig13285	31659	31660	Aqu2.1.26164_001	0	+	1542
Contig13285	49938	50105	Contig13285	51416	51417	Aqu2.1.26169_001	0	+	1312
Contig13285	60822	61587	Contig13285	62192	62193	Aqu2.1.26173_001	0	-	606
Contig13286	37384	38307	Contig13286	35061	35062	Aqu2.1.26198_001	0	-	2323
Contig13286	135465	135713	Contig13286	134597	134598	Aqu2.1.26222_001	0	-	868
Contig13286	140106	140850	Contig13286	134597	134598	Aqu2.1.26222_001	0	-	5509
Contig13289	10729	11304	Contig13289	12144	12145	Aqu2.1.26305_001	0	-	841
Contig13289	95117	96662	Contig13289	92508	92509	Aqu2.1.26328_001	0	+	2609
Contig13289	143539	143784	Contig13289	142019	142020	Aqu2.1.26340_001	0	-	1520
Contig13290	69869	70684	Contig13290	68718	68719	Aqu2.1.26368_001	0	-	1151
Contig13290	98317	99347	Contig13290	96624	96625	Aqu2.1.26376_001	0	-	1693
Contig13291	63274	63609	Contig13291	55977	55978	Aqu2.1.26404_001	0	+	7297
Contig13291	66154	66302	Contig13291	73603	73604	Aqu2.1.26405_001	0	-	7302
Contig13291	67544	67694	Contig13291	73603	73604	Aqu2.1.26405_001	0	-	5910
Contig13292	38854	39520	Contig13292	35722	35723	Aqu2.1.26426_001	0	-	3132
Contig13292	61195	61411	Contig13292	68119	68120	Aqu2.1.26429_001	0	-	6709
Contig13292	64035	64441	Contig13292	68119	68120	Aqu2.1.26429_001	0	-	3679
Contig13292	78312	78804	Contig13292	85853	85854	Aqu2.1.26432_001	0	-	7050
Contig13292	115057	115678	Contig13292	118782	118783	Aqu2.1.26435_001	0	-	3105
Contig13292	125331	126265	Contig13292	118782	118783	Aqu2.1.26435_001	0	-	6549
Contig13293	4810	4971	Contig13293	6073	6074	Aqu2.1.26445_001	0	+	1103
Contig13293	118046	118616	Contig13293	116150	116151	Aqu2.1.26474_001	0	+	1896
Contig13294	6392	6979	Contig13294	2343	2344	Aqu2.1.26482_001	0	+	4049
Contig13294	32766	32934	Contig13294	33973	33974	Aqu2.1.26491_001	0	-	1040
Contig13294	37385	38298	Contig13294	38969	38970	Aqu2.1.26493_001	0	+	672
Contig13294	42869	43093	Contig13294	39000	39001	Aqu2.1.26492_001	0	-	3869
Contig13294	115734	116292	Contig13294	118784	118785	Aqu2.1.26512_001	0	+	2493
Contig13294	121758	122503	Contig13294	118784	118785	Aqu2.1.26512_001	0	+	2974
Contig13294	124612	124880	Contig13294	126493	126494	Aqu2.1.26513_001	0	-	1614
Contig13294	133515	133896	Contig13294	130584	130585	Aqu2.1.26514_001	0	-	2931
Contig13295	24842	25037	Contig13295	23963	23964	Aqu2.1.26523_001	0	+	879
Contig13295	149604	150088	Contig13295	151903	151904	Aqu2.1.26552_001	0	+	1816
Contig13295	155049	155533	Contig13295	152757	152758	Aqu2.1.26551_001	0	-	2292
Contig13296	68352	70240	Contig13296	70544	70545	Aqu2.1.26564_001	0	-	305
Contig13296	108476	108965	Contig13296	111036	111037	Aqu2.1.26575_001	0	-	2072
Contig13296	135903	136289	Contig13296	139512	139513	Aqu2.1.26583_001	0	-	3224
Contig13296	143260	143518	Contig13296	140121	140122	Aqu2.1.26584_001	0	-	3139
Contig13296	144757	145343	Contig13296	149843	149844	Aqu2.1.26586_001	0	-	4501
Contig13297	71975	73663	Contig13297	78014	78015	Aqu2.1.26605_001	0	-	4352
Contig13297	105382	105647	Contig13297	105884	105885	Aqu2.1.26613_001	0	+	238
Contig13297	155525	156109	Contig13297	150255	150256	Aqu2.1.26623_001	0	+	5270
Contig13298	10759	11335	Contig13298	15260	15261	Aqu2.1.26624_001	0	-	3926
Contig13298	47441	47646	Contig13298	45626	45627	Aqu2.1.26630_001	0	-	1815
Contig13298	114312	114560	Contig13298	118167	118168	Aqu2.1.26651_001	0	-	3608
Contig13299	43679	44196	Contig13299	44537	44538	Aqu2.1.26670_001	0	-	342
Contig13299	89461	89901	Contig13299	93278	93279	Aqu2.1.26685_001	0	-	3378
Contig13301	21403	21560	Contig13301	17960	17961	Aqu2.1.26738_001	0	-	3443
Contig13301	83675	85371	Contig13301	80590	80591	Aqu2.1.26749_001	0	+	3085
Contig13301	86452	87515	Contig13301	89224	89225	Aqu2.1.26750_001	0	+	1710
Contig13301	141423	142227	Contig13301	141161	141162	Aqu2.1.26758_001	0	+	262
Contig13301	146051	146633	Contig13301	141161	141162	Aqu2.1.26758_001	0	+	4890
Contig13303	19881	20384	Contig13303	14013	14014	Aqu2.1.26794_001	0	+	5868
Contig13303	20979	21435	Contig13303	27381	27382	Aqu2.1.26795_001	0	+	5947
Contig13304	144101	144271	Contig13304	144631	144632	Aqu2.1.26862_001	0	+	361
Contig13305	152449	152595	Contig13305	149532	149533	Aqu2.1.26906_001	0	+	2917
Contig13306	15380	15622	Contig13306	11872	11873	Aqu2.1.26912_001	0	+	3508
Contig13306	35956	36178	Contig13306	39098	39099	Aqu2.1.26915_001	0	-	2921
Contig13306	82033	82649	Contig13306	86555	86556	Aqu2.1.26926_001	0	-	3907
Contig13306	147575	147805	Contig13306	146791	146792	Aqu2.1.26945_001	0	+	784
Contig13307	49685	50683	Contig13307	54236	54237	Aqu2.1.26951_001	0	-	3554
Contig13307	51866	52394	Contig13307	54236	54237	Aqu2.1.26951_001	0	-	1843
Contig13307	60683	61087	Contig13307	59005	59006	Aqu2.1.26954_001	0	+	1678
Contig13307	101180	101616	Contig13307	96633	96634	Aqu2.1.26964_001	0	+	4547
Contig13307	103392	104229	Contig13307	106795	106796	Aqu2.1.26965_001	0	-	2567
Contig13307	108600	109708	Contig13307	106843	106844	Aqu2.1.26966_001	0	+	1757
Contig13307	110418	110872	Contig13307	106843	106844	Aqu2.1.26966_001	0	+	3575
Contig13307	114361	114996	Contig13307	116015	116016	Aqu2.1.26967_001	0	+	1020
Contig13307	117554	118125	Contig13307	116015	116016	Aqu2.1.26967_001	0	+	1539
Contig13308	18945	19348	Contig13308	18351	18352	Aqu2.1.26985_001	0	+	594
Contig13309	70611	70827	Contig13309	75515	75516	Aqu2.1.27032_001	0	-	4689
Contig13309	71465	71917	Contig13309	75515	75516	Aqu2.1.27032_001	0	-	3599
Contig13310	89007	89811	Contig13310	94600	94601	Aqu2.1.27081_001	0	-	4790
Contig13310	147245	147971	Contig13310	146083	146084	Aqu2.1.27094_001	0	+	1162
Contig13310	162362	162589	Contig13310	161643	161644	Aqu2.1.27097_001	0	-	719
Contig13311	24661	25272	Contig13311	27407	27408	Aqu2.1.27104_001	0	-	2136
Contig13311	44878	45836	Contig13311	39740	39741	Aqu2.1.27108_001	0	-	5138
Contig13311	60896	61454	Contig13311	58325	58326	Aqu2.1.27110_001	0	+	2571
Contig13311	134738	137035	Contig13311	133130	133131	Aqu2.1.27129_001	0	-	1608
Contig13312	58062	59186	Contig13312	64200	64201	Aqu2.1.27151_001	0	-	5015
Contig13313	1149	1624	Contig13313	2338	2339	Aqu2.1.27173_001	0	-	715
Contig13313	10203	12331	Contig13313	9058	9059	Aqu2.1.27176_001	0	+	1145
Contig13313	21599	22384	Contig13313	9058	9059	Aqu2.1.27176_001	0	+	12541
Contig13313	23532	25890	Contig13313	9058	9059	Aqu2.1.27176_001	0	+	14474
Contig13313	67550	68188	Contig13313	66720	66721	Aqu2.1.27186_001	0	-	830
Contig13313	69671	70150	Contig13313	66720	66721	Aqu2.1.27186_001	0	-	2951
Contig13313	94767	96737	Contig13313	94275	94276	Aqu2.1.27194_001	0	-	492
Contig13313	115812	116102	Contig13313	114348	114349	Aqu2.1.27199_001	0	+	1464
Contig13314	9928	10810	Contig13314	8615	8616	Aqu2.1.27220_001	0	-	1313
Contig13314	11792	12204	Contig13314	8615	8616	Aqu2.1.27220_001	0	-	3177
Contig13314	51181	52120	Contig13314	50114	50115	Aqu2.1.27236_001	0	+	1067
Contig13314	152476	153091	Contig13314	147943	147944	Aqu2.1.27265_001	0	+	4533
Contig13314	156141	156393	Contig13314	158663	158664	Aqu2.1.27266_001	0	+	2271
Contig13315	20394	20881	Contig13315	19944	19945	Aqu2.1.27275_001	0	-	450
Contig13315	124869	125202	Contig13315	124327	124328	Aqu2.1.27303_001	0	+	542
Contig13315	135301	135512	Contig13315	136114	136115	Aqu2.1.27304_001	0	+	603
Contig13316	1570	2187	Contig13316	3049	3050	Aqu2.1.27316_001	0	+	863
Contig13316	66142	66981	Contig13316	65451	65452	Aqu2.1.27339_001	0	+	691
Contig13316	103424	103704	Contig13316	101695	101696	Aqu2.1.27349_001	0	-	1729
Contig13316	116843	117698	Contig13316	111788	111789	Aqu2.1.27351_001	0	+	5055
Contig13316	130607	131027	Contig13316	137322	137323	Aqu2.1.27354_001	0	+	6296
Contig13316	135079	135655	Contig13316	137322	137323	Aqu2.1.27354_001	0	+	1668
Contig13317	23863	24095	Contig13317	25080	25081	Aqu2.1.27362_001	0	-	986
Contig13317	78547	78778	Contig13317	77928	77929	Aqu2.1.27374_001	0	+	619
Contig13317	82918	84259	Contig13317	84506	84507	Aqu2.1.27375_001	0	+	248
Contig13317	105017	105196	Contig13317	93196	93197	Aqu2.1.27377_001	0	+	11821
Contig13317	119374	120070	Contig13317	123643	123644	Aqu2.1.27378_001	0	-	3574
Contig13318	67659	68420	Contig13318	72825	72826	Aqu2.1.27410_001	0	-	4406
Contig13318	69766	70667	Contig13318	72825	72826	Aqu2.1.27410_001	0	-	2159
Contig13318	74149	74299	Contig13318	72861	72862	Aqu2.1.27411_001	0	+	1288
Contig13318	109516	110186	Contig13318	113928	113929	Aqu2.1.27417_001	0	-	3743
Contig13318	130055	131378	Contig13318	128904	128905	Aqu2.1.27423_001	0	+	1151
Contig13318	132101	132647	Contig13318	128904	128905	Aqu2.1.27423_001	0	+	3197
Contig13320	55417	56944	Contig13320	54735	54736	Aqu2.1.27475_001	0	+	682
Contig13320	87750	88146	Contig13320	87368	87369	Aqu2.1.27484_001	0	+	382
Contig13320	97303	97531	Contig13320	98559	98560	Aqu2.1.27485_001	0	+	1029
Contig13320	111693	112213	Contig13320	108359	108360	Aqu2.1.27487_001	0	+	3334
Contig13320	112978	113557	Contig13320	108359	108360	Aqu2.1.27487_001	0	+	4619
Contig13320	115351	115695	Contig13320	108359	108360	Aqu2.1.27487_001	0	+	6992
Contig13320	129053	129815	Contig13320	122947	122948	Aqu2.1.27488_001	0	+	6106
Contig13320	130904	131076	Contig13320	137439	137440	Aqu2.1.27489_001	0	-	6364
Contig13320	165123	165622	Contig13320	161550	161551	Aqu2.1.27498_001	0	+	3573
Contig13321	145932	146854	Contig13321	134886	134887	Aqu2.1.27535_001	0	+	11046
Contig13321	148550	148896	Contig13321	159774	159775	Aqu2.1.27536_001	0	-	10879
Contig13322	32010	32423	Contig13322	32900	32901	Aqu2.1.27543_001	0	-	478
Contig13322	33351	33676	Contig13322	32900	32901	Aqu2.1.27543_001	0	-	451
Contig13322	46589	46949	Contig13322	46266	46267	Aqu2.1.27547_001	0	+	323
Contig13322	54436	54705	Contig13322	57500	57501	Aqu2.1.27549_001	0	+	2796
Contig13322	75479	75714	Contig13322	76607	76608	Aqu2.1.27550_001	0	-	894
Contig13322	88460	89757	Contig13322	90323	90324	Aqu2.1.27555_001	0	-	567
Contig13322	100488	100792	Contig13322	102472	102473	Aqu2.1.27560_001	0	-	1681
Contig13322	159325	160812	Contig13322	158026	158027	Aqu2.1.27573_001	0	+	1299
Contig13322	165240	165895	Contig13322	158026	158027	Aqu2.1.27573_001	0	+	7214
Contig13323	91482	92216	Contig13323	94543	94544	Aqu2.1.27594_001	0	-	2328
Contig13323	114366	115065	Contig13323	110386	110387	Aqu2.1.27597_001	0	-	3980
Contig13323	119998	120871	Contig13323	119202	119203	Aqu2.1.27600_001	0	-	796
Contig13324	32809	33472	Contig13324	38674	38675	Aqu2.1.27617_001	0	+	5203
Contig13324	45895	46553	Contig13324	38674	38675	Aqu2.1.27617_001	0	+	7221
Contig13324	52058	52491	Contig13324	64943	64944	Aqu2.1.27618_001	0	-	12453
Contig13324	118152	118397	Contig13324	111939	111940	Aqu2.1.27630_001	0	+	6213
Contig13324	123151	123704	Contig13324	126258	126259	Aqu2.1.27632_001	0	-	2555
Contig13324	124451	124895	Contig13324	126258	126259	Aqu2.1.27632_001	0	-	1364
Contig13324	131636	131788	Contig13324	126258	126259	Aqu2.1.27632_001	0	-	5378
Contig13326	107358	107991	Contig13326	105541	105542	Aqu2.1.27719_001	0	+	1817
Contig13326	109681	111284	Contig13326	111888	111889	Aqu2.1.27720_001	0	-	605
Contig13327	132811	132965	Contig13327	134414	134415	Aqu2.1.27768_001	0	+	1450
Contig13328	57642	57953	Contig13328	61588	61589	Aqu2.1.27787_001	0	-	3636
Contig13329	46560	46979	Contig13329	44938	44939	Aqu2.1.27828_001	0	+	1622
Contig13329	64259	65573	Contig13329	61292	61293	Aqu2.1.27834_001	0	-	2967
Contig13329	165536	166349	Contig13329	159266	159267	Aqu2.1.27853_001	0	+	6270
Contig13329	168749	169899	Contig13329	159266	159267	Aqu2.1.27853_001	0	+	9483
Contig13330	45317	46147	Contig13330	49203	49204	Aqu2.1.27870_001	0	+	3057
Contig13330	65496	66192	Contig13330	68312	68313	Aqu2.1.27881_001	0	-	2121
Contig13330	115915	116399	Contig13330	118465	118466	Aqu2.1.27888_001	0	-	2067
Contig13331	37947	38254	Contig13331	40130	40131	Aqu2.1.27915_001	0	+	1877
Contig13331	59195	59488	Contig13331	57872	57873	Aqu2.1.27925_001	0	+	1323
Contig13331	73888	74372	Contig13331	68445	68446	Aqu2.1.27926_001	0	+	5443
Contig13331	133389	133826	Contig13331	135843	135844	Aqu2.1.27943_001	0	-	2018
Contig13332	53503	53765	Contig13332	55382	55383	Aqu2.1.27964_001	0	-	1618
Contig13332	64594	65057	Contig13332	68696	68697	Aqu2.1.27967_001	0	-	3640
Contig13332	118458	119436	Contig13332	117819	117820	Aqu2.1.27974_001	0	-	639
Contig13334	26246	27619	Contig13334	28569	28570	Aqu2.1.28013_001	0	-	951
Contig13334	29193	29680	Contig13334	28569	28570	Aqu2.1.28013_001	0	-	624
Contig13334	114244	115737	Contig13334	121903	121904	Aqu2.1.28044_001	0	+	6167
Contig13334	116697	117035	Contig13334	121903	121904	Aqu2.1.28044_001	0	+	4869
Contig13334	120400	121240	Contig13334	121903	121904	Aqu2.1.28044_001	0	+	664
Contig13334	129111	129785	Contig13334	123187	123188	Aqu2.1.28043_001	0	-	5924
Contig13334	144300	144463	Contig13334	144899	144900	Aqu2.1.28045_001	0	-	437
Contig13334	145389	145614	Contig13334	144899	144900	Aqu2.1.28045_001	0	-	490
Contig13335	12790	13425	Contig13335	17354	17355	Aqu2.1.28058_001	0	-	3930
Contig13335	39764	40119	Contig13335	41231	41232	Aqu2.1.28075_001	0	+	1113
Contig13335	68972	69785	Contig13335	70940	70941	Aqu2.1.28083_001	0	-	1156
Contig13336	157552	157747	Contig13336	150727	150728	Aqu2.1.28163_001	0	-	6825
Contig13337	65225	66279	Contig13337	67688	67689	Aqu2.1.28177_001	0	-	1410
Contig13337	70044	70287	Contig13337	67983	67984	Aqu2.1.28178_001	0	+	2061
Contig13337	104216	104861	Contig13337	102841	102842	Aqu2.1.28185_001	0	+	1375
Contig13337	115773	116026	Contig13337	111203	111204	Aqu2.1.28186_001	0	+	4570
Contig13337	118594	119234	Contig13337	123542	123543	Aqu2.1.28187_001	0	-	4309
Contig13337	129343	130225	Contig13337	130485	130486	Aqu2.1.28189_001	0	-	261
Contig13337	144361	144804	Contig13337	145998	145999	Aqu2.1.28194_001	0	-	1195
Contig13337	149575	149831	Contig13337	151005	151006	Aqu2.1.28196_001	0	+	1175
Contig13337	162106	162325	Contig13337	160269	160270	Aqu2.1.28198_001	0	+	1837
Contig13338	40834	41329	Contig13338	40507	40508	Aqu2.1.28218_001	0	+	327
Contig13338	138657	140037	Contig13338	137444	137445	Aqu2.1.28243_001	0	-	1213
Contig13338	140961	141817	Contig13338	143580	143581	Aqu2.1.28244_001	0	+	1764
Contig13339	30392	30793	Contig13339	27914	27915	Aqu2.1.28258_001	0	-	2478
Contig13339	75479	75838	Contig13339	73689	73690	Aqu2.1.28272_001	0	+	1790
Contig13339	85784	87319	Contig13339	95114	95115	Aqu2.1.28273_001	0	-	7796
Contig13339	126087	126712	Contig13339	123401	123402	Aqu2.1.28279_001	0	-	2686
Contig13339	134837	135432	Contig13339	133879	133880	Aqu2.1.28281_001	0	+	958
Contig13339	155064	156306	Contig13339	153994	153995	Aqu2.1.28284_001	0	-	1070
Contig13339	164892	165774	Contig13339	165978	165979	Aqu2.1.28287_001	0	+	205
Contig13339	168456	168664	Contig13339	165978	165979	Aqu2.1.28287_001	0	+	2478
Contig13340	9142	9529	Contig13340	10604	10605	Aqu2.1.28296_001	0	+	1076
Contig13340	27091	27263	Contig13340	29425	29426	Aqu2.1.28297_001	0	-	2163
Contig13341	24841	25549	Contig13341	31936	31937	Aqu2.1.28349_001	0	+	6388
Contig13341	28425	28650	Contig13341	31936	31937	Aqu2.1.28349_001	0	+	3287
Contig13341	30108	30299	Contig13341	31936	31937	Aqu2.1.28349_001	0	+	1638
Contig13341	88406	88552	Contig13341	88203	88204	Aqu2.1.28359_001	0	-	203
Contig13341	105985	106180	Contig13341	102277	102278	Aqu2.1.28363_001	0	-	3708
Contig13341	174524	175608	Contig13341	176322	176323	Aqu2.1.28372_001	0	+	715
Contig13341	182641	182826	Contig13341	183404	183405	Aqu2.1.28374_001	0	-	579
Contig13343	98975	99989	Contig13343	98279	98280	Aqu2.1.28445_001	0	-	696
Contig13343	104706	105497	Contig13343	103622	103623	Aqu2.1.28446_001	0	+	1084
Contig13343	107750	108975	Contig13343	112895	112896	Aqu2.1.28447_001	0	-	3921
Contig13343	157045	157565	Contig13343	154432	154433	Aqu2.1.28461_001	0	+	2613
Contig13343	162506	162692	Contig13343	160645	160646	Aqu2.1.28462_001	0	+	1861
Contig13343	174624	174863	Contig13343	175664	175665	Aqu2.1.28466_001	0	+	802
Contig13343	179912	180138	Contig13343	175664	175665	Aqu2.1.28466_001	0	+	4248
Contig13344	15265	16095	Contig13344	12305	12306	Aqu2.1.28471_001	0	+	2960
Contig13344	25446	25645	Contig13344	24755	24756	Aqu2.1.28474_001	0	-	691
Contig13344	72576	72791	Contig13344	74021	74022	Aqu2.1.28498_001	0	-	1231
Contig13345	24628	25267	Contig13345	21614	21615	Aqu2.1.28547_001	0	-	3014
Contig13345	57755	58349	Contig13345	59780	59781	Aqu2.1.28559_001	0	-	1432
Contig13345	152503	152903	Contig13345	149702	149703	Aqu2.1.28586_001	0	-	2801
Contig13345	159750	160139	Contig13345	157755	157756	Aqu2.1.28587_001	0	-	1995
Contig13345	185588	185874	Contig13345	186148	186149	Aqu2.1.28596_001	0	-	275
Contig13346	10738	12042	Contig13346	7017	7018	Aqu2.1.28598_001	0	+	3721
Contig13346	83405	83744	Contig13346	84391	84392	Aqu2.1.28609_001	0	-	648
Contig13346	139729	140590	Contig13346	141653	141654	Aqu2.1.28619_001	0	+	1064
Contig13347	65538	65684	Contig13347	63188	63189	Aqu2.1.28654_001	0	+	2350
Contig13347	70351	70926	Contig13347	69633	69634	Aqu2.1.28655_001	0	+	718
Contig13347	179400	179893	Contig13347	174582	174583	Aqu2.1.28684_001	0	+	4818
Contig13348	17291	17830	Contig13348	12100	12101	Aqu2.1.28689_001	0	+	5191
Contig13348	83384	83620	Contig13348	89814	89815	Aqu2.1.28714_001	0	-	6195
Contig13348	118901	119303	Contig13348	117742	117743	Aqu2.1.28723_001	0	-	1159
Contig13348	128535	128963	Contig13348	131731	131732	Aqu2.1.28726_001	0	-	2769
Contig13349	51047	51694	Contig13349	54319	54320	Aqu2.1.28743_001	0	-	2626
Contig13349	129570	130479	Contig13349	141436	141437	Aqu2.1.28763_001	0	-	10958
Contig13350	28588	29216	Contig13350	24928	24929	Aqu2.1.28791_001	0	-	3660
Contig13350	66881	67484	Contig13350	75348	75349	Aqu2.1.28798_001	0	-	7865
Contig13350	78058	79378	Contig13350	75411	75412	Aqu2.1.28800_001	0	+	2647
Contig13350	85959	87058	Contig13350	97175	97176	Aqu2.1.28802_001	0	-	10118
Contig13350	100631	100810	Contig13350	103362	103363	Aqu2.1.28801_001	0	-	2553
Contig13350	138542	138871	Contig13350	139800	139801	Aqu2.1.28814_001	0	-	930
Contig13350	141251	142192	Contig13350	143489	143490	Aqu2.1.28816_001	0	-	1298
Contig13350	162825	163003	Contig13350	160055	160056	Aqu2.1.28822_001	0	+	2770
Contig13350	166310	166656	Contig13350	168819	168820	Aqu2.1.28823_001	0	-	2164
Contig13350	167396	167958	Contig13350	168819	168820	Aqu2.1.28823_001	0	-	862
Contig13351	24250	24758	Contig13351	18451	18452	Aqu2.1.28831_001	0	+	5799
Contig13351	37978	38680	Contig13351	35035	35036	Aqu2.1.28833_001	0	+	2943
Contig13351	39757	40540	Contig13351	35035	35036	Aqu2.1.28833_001	0	+	4722
Contig13351	41291	41626	Contig13351	45821	45822	Aqu2.1.28834_001	0	-	4196
Contig13351	45419	45614	Contig13351	45821	45822	Aqu2.1.28834_001	0	-	208
Contig13351	63455	64874	Contig13351	60552	60553	Aqu2.1.28836_001	0	+	2903
Contig13351	89705	90788	Contig13351	85562	85563	Aqu2.1.28844_001	0	+	4143
Contig13351	93004	93382	Contig13351	100482	100483	Aqu2.1.28843_001	0	-	7101
Contig13351	96294	97894	Contig13351	100482	100483	Aqu2.1.28843_001	0	-	2589
Contig13351	98590	98810	Contig13351	100482	100483	Aqu2.1.28843_001	0	-	1673
Contig13351	103820	104255	Contig13351	104703	104704	Aqu2.1.28846_001	0	-	449
Contig13351	124853	125194	Contig13351	125887	125888	Aqu2.1.28857_001	0	-	694
Contig13351	157034	157360	Contig13351	157837	157838	Aqu2.1.28867_001	0	-	478
Contig13351	160133	160785	Contig13351	159378	159379	Aqu2.1.28868_001	0	-	755
Contig13352	64113	64302	Contig13352	62460	62461	Aqu2.1.28901_001	0	+	1653
Contig13352	116318	116506	Contig13352	117026	117027	Aqu2.1.28913_001	0	+	521
Contig13352	154343	155132	Contig13352	155609	155610	Aqu2.1.28926_001	0	+	478
Contig13353	62449	64282	Contig13353	66466	66467	Aqu2.1.28956_001	0	-	2185
Contig13353	161041	162108	Contig13353	159639	159640	Aqu2.1.28988_001	0	+	1402
Contig13353	163373	163867	Contig13353	164188	164189	Aqu2.1.28989_001	0	+	322
Contig13353	166502	168299	Contig13353	164188	164189	Aqu2.1.28989_001	0	+	2314
Contig13354	115337	115943	Contig13354	113676	113677	Aqu2.1.29020_001	0	+	1661
Contig13354	147154	147700	Contig13354	149118	149119	Aqu2.1.29024_001	0	-	1419
Contig13354	167796	168425	Contig13354	166014	166015	Aqu2.1.29027_001	0	+	1782
Contig13354	185294	185736	Contig13354	182636	182637	Aqu2.1.29033_001	0	+	2658
Contig13355	63086	63556	Contig13355	64126	64127	Aqu2.1.29057_001	0	-	571
Contig13355	162936	163166	Contig13355	165138	165139	Aqu2.1.29083_001	0	-	1973
Contig13356	42962	43718	Contig13356	44033	44034	Aqu2.1.29110_001	0	-	316
Contig13356	50360	51094	Contig13356	49084	49085	Aqu2.1.29116_001	0	+	1276
Contig13356	92795	93477	Contig13356	98936	98937	Aqu2.1.29125_001	0	-	5460
Contig13356	111318	111864	Contig13356	112808	112809	Aqu2.1.29132_001	0	+	945
Contig13356	137329	137564	Contig13356	145281	145282	Aqu2.1.29138_001	0	+	7718
Contig13356	149075	149634	Contig13356	145281	145282	Aqu2.1.29138_001	0	+	3794
Contig13357	182950	184414	Contig13357	192895	192896	Aqu2.1.29207_001	0	+	8482
Contig13357	185187	185391	Contig13357	192895	192896	Aqu2.1.29207_001	0	+	7505
Contig13357	187345	187943	Contig13357	192895	192896	Aqu2.1.29207_001	0	+	4953
Contig13357	194636	194835	Contig13357	192895	192896	Aqu2.1.29207_001	0	+	1741
Contig13358	49603	50134	Contig13358	50877	50878	Aqu2.1.29212_001	0	-	744
Contig13358	75923	76083	Contig13358	75134	75135	Aqu2.1.29219_001	0	-	789
Contig13358	98068	98984	Contig13358	102859	102860	Aqu2.1.29225_001	0	-	3876
Contig13358	160297	160670	Contig13358	164617	164618	Aqu2.1.29237_001	0	-	3948
Contig13358	186857	187428	Contig13358	188287	188288	Aqu2.1.29244_001	0	-	860
Contig13359	13225	13412	Contig13359	14302	14303	Aqu2.1.29253_001	0	-	891
Contig13359	16544	16722	Contig13359	14302	14303	Aqu2.1.29253_001	0	-	2242
Contig13359	49621	50270	Contig13359	46448	46449	Aqu2.1.29267_001	0	-	3173
Contig13359	100846	101100	Contig13359	105975	105976	Aqu2.1.29278_001	0	+	4876
Contig13359	156759	157582	Contig13359	160894	160895	Aqu2.1.29289_001	0	+	3313
Contig13360	165851	166183	Contig13360	167180	167181	Aqu2.1.29350_001	0	+	998
Contig13360	181524	181928	Contig13360	183069	183070	Aqu2.1.29353_001	0	+	1142
Contig13360	189710	190402	Contig13360	194499	194500	Aqu2.1.29354_001	0	+	4098
Contig13361	29065	29422	Contig13361	30714	30715	Aqu2.1.29366_001	0	-	1293
Contig13361	36130	36552	Contig13361	33116	33117	Aqu2.1.29367_001	0	-	3014
Contig13361	77803	78288	Contig13361	72784	72785	Aqu2.1.29373_001	0	+	5019
Contig13361	81566	81826	Contig13361	72784	72785	Aqu2.1.29373_001	0	+	8782
Contig13361	82463	82642	Contig13361	72784	72785	Aqu2.1.29373_001	0	+	9679
Contig13361	162119	162624	Contig13361	157676	157677	Aqu2.1.29382_001	0	-	4443
Contig13361	165234	165830	Contig13361	167332	167333	Aqu2.1.29384_001	0	-	1503
Contig13361	170316	170959	Contig13361	171258	171259	Aqu2.1.29386_001	0	+	300
Contig13362	38985	39354	Contig13362	41507	41508	Aqu2.1.29403_001	0	+	2154
Contig13362	45330	45658	Contig13362	48665	48666	Aqu2.1.29402_001	0	-	3008
Contig13362	50617	51669	Contig13362	49856	49857	Aqu2.1.29404_001	0	-	761
Contig13362	84361	85273	Contig13362	90250	90251	Aqu2.1.29417_001	0	-	4978
Contig13362	121943	122103	Contig13362	113947	113948	Aqu2.1.29423_001	0	+	7996
Contig13362	123818	124402	Contig13362	113947	113948	Aqu2.1.29423_001	0	+	9871
Contig13362	126354	126703	Contig13362	113947	113948	Aqu2.1.29423_001	0	+	12407
Contig13362	148062	148475	Contig13362	149199	149200	Aqu2.1.29424_001	0	-	725
Contig13363	36897	37703	Contig13363	36528	36529	Aqu2.1.29439_001	0	+	369
Contig13363	123694	124808	Contig13363	125144	125145	Aqu2.1.29460_001	0	+	337
Contig13364	111422	112321	Contig13364	114210	114211	Aqu2.1.29491_001	0	-	1890
Contig13364	117295	118013	Contig13364	114210	114211	Aqu2.1.29491_001	0	-	3085
Contig13365	34134	34607	Contig13365	48089	48090	Aqu2.1.29513_001	0	-	13483
Contig13367	7081	7443	Contig13367	2670	2671	Aqu2.1.29619_001	0	+	4411
Contig13367	131021	131842	Contig13367	129630	129631	Aqu2.1.29638_001	0	-	1391
Contig13367	191232	192040	Contig13367	193074	193075	Aqu2.1.29658_001	0	+	1035
Contig13368	11377	12205	Contig13368	13516	13517	Aqu2.1.29664_001	0	-	1312
Contig13369	90342	91559	Contig13369	93999	94000	Aqu2.1.29720_001	0	-	2441
Contig13370	60043	60296	Contig13370	64491	64492	Aqu2.1.29757_001	0	+	4196
Contig13370	142415	142590	Contig13370	141799	141800	Aqu2.1.29786_001	0	+	616
Contig13370	175995	177022	Contig13370	172203	172204	Aqu2.1.29796_001	0	+	3792
Contig13371	85043	85478	Contig13371	80012	80013	Aqu2.1.29829_001	0	-	5031
Contig13371	102518	102898	Contig13371	98311	98312	Aqu2.1.29830_001	0	+	4207
Contig13371	129548	129700	Contig13371	132224	132225	Aqu2.1.29836_001	0	-	2525
Contig13372	41289	41718	Contig13372	40560	40561	Aqu2.1.29853_001	0	-	729
Contig13372	59766	59983	Contig13372	59264	59265	Aqu2.1.29859_001	0	-	502
Contig13373	59654	59989	Contig13373	56472	56473	Aqu2.1.29926_001	0	+	3182
Contig13373	165111	165582	Contig13373	163733	163734	Aqu2.1.29969_001	0	+	1378
Contig13373	170690	171454	Contig13373	172078	172079	Aqu2.1.29970_001	0	+	625
Contig13374	34401	34763	Contig13374	32391	32392	Aqu2.1.29995_001	0	+	2010
Contig13374	68181	68467	Contig13374	66714	66715	Aqu2.1.30002_001	0	+	1467
Contig13374	148197	148596	Contig13374	147906	147907	Aqu2.1.30029_001	0	+	291
Contig13376	17750	17993	Contig13376	17105	17106	Aqu2.1.30115_001	0	-	645
Contig13376	71043	71220	Contig13376	73416	73417	Aqu2.1.30128_001	0	+	2197
Contig13376	82197	82374	Contig13376	81963	81964	Aqu2.1.30132_001	0	+	234
Contig13377	30944	32388	Contig13377	29012	29013	Aqu2.1.30169_001	0	+	1932
Contig13377	35849	36526	Contig13377	37017	37018	Aqu2.1.30170_001	0	-	492
Contig13377	46532	47016	Contig13377	48491	48492	Aqu2.1.30168_001	0	-	1476
Contig13377	55900	56418	Contig13377	58052	58053	Aqu2.1.30171_001	0	-	1635
Contig13377	94523	95107	Contig13377	90036	90037	Aqu2.1.30183_001	0	+	4487
Contig13377	97498	97861	Contig13377	99997	99998	Aqu2.1.30182_001	0	-	2137
Contig13377	115234	115659	Contig13377	114826	114827	Aqu2.1.30191_001	0	-	408
Contig13377	143376	143900	Contig13377	144117	144118	Aqu2.1.30200_001	0	+	218
Contig13377	175475	175680	Contig13377	168988	168989	Aqu2.1.30205_001	0	-	6487
Contig13378	210361	210523	Contig13378	209947	209948	Aqu2.1.30237_001	0	-	414
Contig13379	9480	9984	Contig13379	7149	7150	Aqu2.1.30239_001	0	+	2331
Contig13379	32401	33651	Contig13379	37897	37898	Aqu2.1.30241_001	0	-	4247
Contig13379	106984	108806	Contig13379	102900	102901	Aqu2.1.30258_001	0	-	4084
Contig13379	201432	201580	Contig13379	203614	203615	Aqu2.1.30274_001	0	-	2035
Contig13380	13742	14360	Contig13380	9983	9984	Aqu2.1.30281_001	0	+	3759
Contig13380	17159	17402	Contig13380	21180	21181	Aqu2.1.30282_001	0	+	3779
Contig13380	34769	35498	Contig13380	37630	37631	Aqu2.1.30283_001	0	-	2133
Contig13380	42395	42639	Contig13380	42137	42138	Aqu2.1.30286_001	0	+	258
Contig13380	46619	46868	Contig13380	43635	43636	Aqu2.1.30288_001	0	+	2984
Contig13380	65077	65361	Contig13380	62063	62064	Aqu2.1.30292_001	0	+	3014
Contig13380	72156	72910	Contig13380	68692	68693	Aqu2.1.30293_001	0	+	3464
Contig13380	150418	151429	Contig13380	149548	149549	Aqu2.1.30306_001	0	+	870
Contig13380	154109	154578	Contig13380	152512	152513	Aqu2.1.30307_001	0	+	1597
Contig13381	70503	71757	Contig13381	69138	69139	Aqu2.1.30347_001	0	+	1365
Contig13382	56865	57026	Contig13382	58018	58019	Aqu2.1.30403_001	0	-	993
Contig13382	122014	123320	Contig13382	121573	121574	Aqu2.1.30420_001	0	+	441
Contig13382	172478	172916	Contig13382	172204	172205	Aqu2.1.30428_001	0	-	274
Contig13382	185172	185772	Contig13382	187362	187363	Aqu2.1.30433_001	0	+	1591
Contig13382	197772	198218	Contig13382	201198	201199	Aqu2.1.30435_001	0	-	2981
Contig13382	199735	200834	Contig13382	201198	201199	Aqu2.1.30435_001	0	-	365
Contig13382	206380	208649	Contig13382	209873	209874	Aqu2.1.30437_001	0	-	1225
Contig13383	6758	7033	Contig13383	7252	7253	Aqu2.1.30440_001	0	-	220
Contig13383	43020	43581	Contig13383	35934	35935	Aqu2.1.30447_001	0	+	7086
Contig13383	55045	55533	Contig13383	56248	56249	Aqu2.1.30449_001	0	-	716
Contig13383	72629	72924	Contig13383	61309	61310	Aqu2.1.30448_001	0	-	11320
Contig13383	78151	78467	Contig13383	87541	87542	Aqu2.1.30450_001	0	-	9075
Contig13383	100904	101471	Contig13383	100224	100225	Aqu2.1.30454_001	0	-	680
Contig13383	110624	110950	Contig13383	120344	120345	Aqu2.1.30455_001	0	-	9395
Contig13383	135274	135420	Contig13383	127333	127334	Aqu2.1.30458_001	0	-	7941
Contig13384	28833	29280	Contig13384	27195	27196	Aqu2.1.30486_001	0	-	1638
Contig13384	51986	52307	Contig13384	55757	55758	Aqu2.1.30490_001	0	+	3451
Contig13384	118084	118591	Contig13384	119801	119802	Aqu2.1.30507_001	0	+	1211
Contig13384	129814	130414	Contig13384	131790	131791	Aqu2.1.30510_001	0	-	1377
Contig13385	126646	127737	Contig13385	126054	126055	Aqu2.1.30556_001	0	-	592
Contig13386	18090	19210	Contig13386	16767	16768	Aqu2.1.30578_001	0	+	1323
Contig13386	38076	38751	Contig13386	43345	43346	Aqu2.1.30582_001	0	-	4595
Contig13386	40982	42010	Contig13386	43345	43346	Aqu2.1.30582_001	0	-	1336
Contig13386	110122	110380	Contig13386	112780	112781	Aqu2.1.30594_001	0	-	2401
Contig13386	171258	172190	Contig13386	172395	172396	Aqu2.1.30613_001	0	-	206
Contig13386	201070	202352	Contig13386	198467	198468	Aqu2.1.30625_001	0	+	2603
Contig13386	213784	214215	Contig13386	198467	198468	Aqu2.1.30625_001	0	+	15317
Contig13387	204174	204347	Contig13387	199355	199356	Aqu2.1.30644_001	0	+	4819
Contig13387	210596	211415	Contig13387	214998	214999	Aqu2.1.30645_001	0	+	3584
Contig13388	88423	88780	Contig13388	83153	83154	Aqu2.1.30674_001	0	-	5270
Contig13388	96539	97026	Contig13388	100239	100240	Aqu2.1.30675_001	0	-	3214
Contig13388	143791	144266	Contig13388	145969	145970	Aqu2.1.30684_001	0	+	1704
Contig13388	146190	146500	Contig13388	145969	145970	Aqu2.1.30684_001	0	+	221
Contig13389	13538	14086	Contig13389	14890	14891	Aqu2.1.30707_001	0	-	805
Contig13389	85363	85588	Contig13389	86532	86533	Aqu2.1.30721_001	0	-	945
Contig13389	98274	99336	Contig13389	103640	103641	Aqu2.1.30727_001	0	-	4305
Contig13389	114485	114715	Contig13389	117931	117932	Aqu2.1.30729_001	0	+	3217
Contig13389	143751	143928	Contig13389	135168	135169	Aqu2.1.30734_001	0	+	8583
Contig13389	149508	149876	Contig13389	155356	155357	Aqu2.1.30735_001	0	-	5481
Contig13389	175153	176370	Contig13389	178444	178445	Aqu2.1.30737_001	0	-	2075
Contig13391	16521	16785	Contig13391	15366	15367	Aqu2.1.30806_001	0	+	1155
Contig13391	101368	101585	Contig13391	99681	99682	Aqu2.1.30820_001	0	+	1687
Contig13391	195712	196426	Contig13391	196631	196632	Aqu2.1.30831_001	0	-	206
Contig13392	59088	60067	Contig13392	65108	65109	Aqu2.1.30860_001	0	-	5042
Contig13392	69096	69315	Contig13392	69987	69988	Aqu2.1.30862_001	0	-	673
Contig13392	110321	110563	Contig13392	107521	107522	Aqu2.1.30877_001	0	+	2800
Contig13392	170902	171403	Contig13392	174612	174613	Aqu2.1.30900_001	0	+	3210
Contig13392	172080	172458	Contig13392	174612	174613	Aqu2.1.30900_001	0	+	2155
Contig13392	180963	181292	Contig13392	182116	182117	Aqu2.1.30905_001	0	+	825
Contig13393	29526	30280	Contig13393	33517	33518	Aqu2.1.30923_001	0	-	3238
Contig13393	167162	167403	Contig13393	160596	160597	Aqu2.1.30970_001	0	-	6566
Contig13394	79874	80093	Contig13394	82636	82637	Aqu2.1.31004_001	0	-	2544
Contig13394	108182	111024	Contig13394	105623	105624	Aqu2.1.31014_001	0	+	2559
Contig13394	119037	119502	Contig13394	115141	115142	Aqu2.1.31015_001	0	+	3896
Contig13394	175085	175555	Contig13394	166881	166882	Aqu2.1.31023_001	0	+	8204
Contig13394	193659	195646	Contig13394	196749	196750	Aqu2.1.31026_001	0	-	1104
Contig13394	214748	215968	Contig13394	206982	206983	Aqu2.1.31027_001	0	-	7766
Contig13395	48007	50002	Contig13395	47426	47427	Aqu2.1.31036_001	0	-	581
Contig13395	179200	179736	Contig13395	182147	182148	Aqu2.1.31058_001	0	-	2412
Contig13395	180947	181421	Contig13395	182147	182148	Aqu2.1.31058_001	0	-	727
Contig13396	11233	11820	Contig13396	12381	12382	Aqu2.1.31068_001	0	-	562
Contig13396	15695	15869	Contig13396	19083	19084	Aqu2.1.31069_001	0	-	3215
Contig13396	75043	76054	Contig13396	77886	77887	Aqu2.1.31081_001	0	-	1833
Contig13396	100077	100232	Contig13396	100467	100468	Aqu2.1.31086_001	0	+	236
Contig13396	127921	128640	Contig13396	125788	125789	Aqu2.1.31087_001	0	-	2133
Contig13396	191332	191831	Contig13396	189521	189522	Aqu2.1.31100_001	0	+	1811
Contig13396	194882	195456	Contig13396	198173	198174	Aqu2.1.31101_001	0	-	2718
Contig13398	39813	40281	Contig13398	33013	33014	Aqu2.1.31153_001	0	+	6800
Contig13398	45829	47344	Contig13398	33013	33014	Aqu2.1.31153_001	0	+	12816
Contig13398	88088	89140	Contig13398	90998	90999	Aqu2.1.31167_001	0	-	1859
Contig13398	92668	93196	Contig13398	92336	92337	Aqu2.1.31168_001	0	+	332
Contig13398	164316	164790	Contig13398	166846	166847	Aqu2.1.31183_001	0	+	2057
Contig13398	180082	181161	Contig13398	179634	179635	Aqu2.1.31188_001	0	+	448
Contig13398	183062	183718	Contig13398	185186	185187	Aqu2.1.31189_001	0	-	1469
Contig13398	189573	190111	Contig13398	192157	192158	Aqu2.1.31190_001	0	+	2047
Contig13399	26362	27072	Contig13399	30311	30312	Aqu2.1.31205_001	0	-	3240
Contig13399	67231	67908	Contig13399	66662	66663	Aqu2.1.31216_001	0	+	569
Contig13399	70140	71361	Contig13399	66662	66663	Aqu2.1.31216_001	0	+	3478
Contig13399	76249	76484	Contig13399	81759	81760	Aqu2.1.31217_001	0	-	5276
Contig13399	79140	79757	Contig13399	81759	81760	Aqu2.1.31217_001	0	-	2003
Contig13399	98040	98519	Contig13399	97212	97213	Aqu2.1.31224_001	0	+	828
Contig13399	150287	150481	Contig13399	148452	148453	Aqu2.1.31239_001	0	-	1835
Contig13399	154073	154803	Contig13399	152594	152595	Aqu2.1.31242_001	0	+	1479
Contig13400	1143	1321	Contig13400	18318	18319	Aqu2.1.31267_001	0	+	16998
Contig13400	69571	70754	Contig13400	68000	68001	Aqu2.1.31282_001	0	+	1571
Contig13401	44858	45831	Contig13401	46974	46975	Aqu2.1.31347_001	0	-	1144
Contig13401	68345	68816	Contig13401	66121	66122	Aqu2.1.31353_001	0	+	2224
Contig13401	73587	74547	Contig13401	72253	72254	Aqu2.1.31354_001	0	+	1334
Contig13401	101846	102100	Contig13401	98802	98803	Aqu2.1.31362_001	0	+	3044
Contig13401	105836	106654	Contig13401	107557	107558	Aqu2.1.31361_001	0	-	904
Contig13401	171441	172560	Contig13401	170479	170480	Aqu2.1.31392_001	0	+	962
Contig13402	24663	25462	Contig13402	22694	22695	Aqu2.1.31414_001	0	+	1969
Contig13402	66121	66562	Contig13402	63473	63474	Aqu2.1.31424_001	0	+	2648
Contig13402	106194	107379	Contig13402	105638	105639	Aqu2.1.31436_001	0	+	556
Contig13402	136442	136613	Contig13402	133263	133264	Aqu2.1.31441_001	0	+	3179
Contig13402	150530	151668	Contig13402	154181	154182	Aqu2.1.31447_001	0	-	2514
Contig13403	98871	99627	Contig13403	95679	95680	Aqu2.1.31487_001	0	-	3192
Contig13403	106608	106795	Contig13403	107646	107647	Aqu2.1.31491_001	0	+	852
Contig13403	136315	136815	Contig13403	138651	138652	Aqu2.1.31497_001	0	-	1837
Contig13403	148226	148494	Contig13403	149565	149566	Aqu2.1.31500_001	0	+	1072
Contig13403	150008	150294	Contig13403	149565	149566	Aqu2.1.31500_001	0	+	443
Contig13403	197209	197916	Contig13403	200042	200043	Aqu2.1.31510_001	0	+	2127
Contig13403	199551	199811	Contig13403	200042	200043	Aqu2.1.31510_001	0	+	232
Contig13403	208655	208938	Contig13403	206393	206394	Aqu2.1.31511_001	0	-	2262
Contig13403	230928	231802	Contig13403	227855	227856	Aqu2.1.31515_001	0	-	3073
Contig13403	232505	233678	Contig13403	235717	235718	Aqu2.1.31517_001	0	-	2040
Contig13404	102707	103055	Contig13404	87907	87908	Aqu2.1.31543_001	0	+	14800
Contig13404	116749	116986	Contig13404	119415	119416	Aqu2.1.31544_001	0	-	2430
Contig13405	118970	119141	Contig13405	113577	113578	Aqu2.1.31600_001	0	+	5393
Contig13405	222178	223054	Contig13405	219074	219075	Aqu2.1.31616_001	0	-	3104
Contig13406	77895	79284	Contig13406	76545	76546	Aqu2.1.31633_001	0	-	1350
Contig13406	83242	83938	Contig13406	76545	76546	Aqu2.1.31633_001	0	-	6697
Contig13406	114450	116281	Contig13406	108250	108251	Aqu2.1.31639_001	0	+	6200
Contig13406	123646	123964	Contig13406	124211	124212	Aqu2.1.31641_001	0	+	248
Contig13406	128406	130020	Contig13406	127305	127306	Aqu2.1.31642_001	0	+	1101
Contig13406	141136	142424	Contig13406	147082	147083	Aqu2.1.31643_001	0	-	4659
Contig13406	166068	166311	Contig13406	165491	165492	Aqu2.1.31653_001	0	+	577
Contig13407	11899	12053	Contig13407	6432	6433	Aqu2.1.31674_001	0	-	5467
Contig13407	16658	16819	Contig13407	19609	19610	Aqu2.1.31673_001	0	-	2791
Contig13407	96485	96753	Contig13407	89984	89985	Aqu2.1.31687_001	0	-	6501
Contig13407	104534	105085	Contig13407	108809	108810	Aqu2.1.31688_001	0	-	3725
Contig13408	60596	60948	Contig13408	63801	63802	Aqu2.1.31726_001	0	-	2854
Contig13409	126570	126998	Contig13409	122860	122861	Aqu2.1.31803_001	0	+	3710
Contig13409	128217	129041	Contig13409	122860	122861	Aqu2.1.31803_001	0	+	5357
Contig13409	224578	224992	Contig13409	228340	228341	Aqu2.1.31839_001	0	-	3349
Contig13409	232538	233223	Contig13409	237134	237135	Aqu2.1.31842_001	0	+	3912
Contig13409	234446	235029	Contig13409	237134	237135	Aqu2.1.31842_001	0	+	2106
Contig13410	10607	12017	Contig13410	9245	9246	Aqu2.1.31845_001	0	+	1362
Contig13410	50590	50762	Contig13410	45526	45527	Aqu2.1.31849_001	0	+	5064
Contig13410	81124	81705	Contig13410	80296	80297	Aqu2.1.31855_001	0	+	828
Contig13411	20971	21398	Contig13411	18047	18048	Aqu2.1.31887_001	0	+	2924
Contig13411	27044	27624	Contig13411	24663	24664	Aqu2.1.31888_001	0	-	2381
Contig13411	29295	30169	Contig13411	30415	30416	Aqu2.1.31890_001	0	+	247
Contig13411	37314	39222	Contig13411	30427	30428	Aqu2.1.31889_001	0	-	6887
Contig13411	59506	60775	Contig13411	59233	59234	Aqu2.1.31894_001	0	-	273
Contig13411	112063	112215	Contig13411	115203	115204	Aqu2.1.31918_001	0	-	2989
Contig13411	113012	113539	Contig13411	115203	115204	Aqu2.1.31918_001	0	-	1665
Contig13411	163023	164053	Contig13411	161688	161689	Aqu2.1.31932_001	0	+	1335
Contig13411	201862	202210	Contig13411	201016	201017	Aqu2.1.31943_001	0	+	846
Contig13412	47842	48015	Contig13412	47287	47288	Aqu2.1.31962_001	0	-	555
Contig13412	218399	218630	Contig13412	217558	217559	Aqu2.1.32010_001	0	+	841
Contig13413	36944	37107	Contig13413	37871	37872	Aqu2.1.32023_001	0	-	765
Contig13413	61434	61587	Contig13413	56587	56588	Aqu2.1.32031_001	0	-	4847
Contig13413	118696	119112	Contig13413	123203	123204	Aqu2.1.32038_001	0	+	4092
Contig13414	100406	101354	Contig13414	96587	96588	Aqu2.1.32111_001	0	+	3819
Contig13414	115537	116853	Contig13414	118311	118312	Aqu2.1.32117_001	0	-	1459
Contig13414	120485	120668	Contig13414	121967	121968	Aqu2.1.32118_001	0	-	1300
Contig13414	145018	145798	Contig13414	146571	146572	Aqu2.1.32125_001	0	-	774
Contig13414	233123	233313	Contig13414	230684	230685	Aqu2.1.32156_001	0	+	2439
Contig13415	97260	97563	Contig13415	96985	96986	Aqu2.1.32177_001	0	+	275
Contig13415	130800	131524	Contig13415	129431	129432	Aqu2.1.32180_001	0	+	1369
Contig13416	47211	47361	Contig13416	45191	45192	Aqu2.1.32220_001	0	+	2020
Contig13416	47973	48205	Contig13416	45191	45192	Aqu2.1.32220_001	0	+	2782
Contig13416	65395	65689	Contig13416	68138	68139	Aqu2.1.32224_001	0	-	2450
Contig13416	77969	79108	Contig13416	82511	82512	Aqu2.1.32230_001	0	-	3404
Contig13416	213552	214963	Contig13416	210428	210429	Aqu2.1.32270_001	0	+	3124
Contig13416	217242	218071	Contig13416	219432	219433	Aqu2.1.32271_001	0	+	1362
Contig13416	222892	223124	Contig13416	223763	223764	Aqu2.1.32272_001	0	-	640
Contig13418	163073	164429	Contig13418	169944	169945	Aqu2.1.32382_001	0	-	5516
Contig13418	205277	205580	Contig13418	201119	201120	Aqu2.1.32387_001	0	+	4158
Contig13419	52885	53078	Contig13419	51992	51993	Aqu2.1.32408_001	0	+	893
Contig13419	119387	119656	Contig13419	117901	117902	Aqu2.1.32428_001	0	-	1486
Contig13419	163131	163350	Contig13419	165862	165863	Aqu2.1.32442_001	0	-	2513
Contig13419	205111	205414	Contig13419	206146	206147	Aqu2.1.32448_001	0	-	733
Contig13419	214552	215244	Contig13419	215905	215906	Aqu2.1.32450_001	0	+	662
Contig13420	34913	35516	Contig13420	33209	33210	Aqu2.1.32469_001	0	+	1704
Contig13420	225594	225785	Contig13420	226558	226559	Aqu2.1.32521_001	0	-	774
Contig13421	25915	26451	Contig13421	22892	22893	Aqu2.1.32540_001	0	-	3023
Contig13421	87667	88077	Contig13421	84091	84092	Aqu2.1.32558_001	0	-	3576
Contig13421	140021	141056	Contig13421	139562	139563	Aqu2.1.32578_001	0	-	459
Contig13421	155877	156499	Contig13421	159987	159988	Aqu2.1.32584_001	0	-	3489
Contig13421	197903	198554	Contig13421	199342	199343	Aqu2.1.32597_001	0	-	789
Contig13422	17653	18124	Contig13422	16762	16763	Aqu2.1.32615_001	0	+	891
Contig13422	196084	196491	Contig13422	203782	203783	Aqu2.1.32636_001	0	-	7292
Contig13423	137754	139810	Contig13423	136847	136848	Aqu2.1.32681_001	0	-	907
Contig13423	141424	142091	Contig13423	136847	136848	Aqu2.1.32681_001	0	-	4577
Contig13423	217628	218318	Contig13423	219623	219624	Aqu2.1.32690_001	0	+	1306
Contig13424	8300	9427	Contig13424	1811	1812	Aqu2.1.32701_001	0	-	6489
Contig13424	178474	179144	Contig13424	179949	179950	Aqu2.1.32744_001	0	-	806
Contig13426	75741	76429	Contig13426	75233	75234	Aqu2.1.32858_001	0	-	508
Contig13426	138791	139266	Contig13426	143528	143529	Aqu2.1.32869_001	0	+	4263
Contig13426	151474	152616	Contig13426	150583	150584	Aqu2.1.32870_001	0	-	891
Contig13426	155331	156136	Contig13426	150583	150584	Aqu2.1.32870_001	0	-	4748
Contig13426	182298	182739	Contig13426	163467	163468	Aqu2.1.32872_001	0	+	18831
Contig13426	230390	231377	Contig13426	233574	233575	Aqu2.1.32878_001	0	+	2198
Contig13427	46377	46919	Contig13427	45003	45004	Aqu2.1.32901_001	0	-	1374
Contig13427	128022	128503	Contig13427	129854	129855	Aqu2.1.32925_001	0	-	1352
Contig13427	129171	129527	Contig13427	129854	129855	Aqu2.1.32925_001	0	-	328
Contig13427	132565	133079	Contig13427	134793	134794	Aqu2.1.32926_001	0	-	1715
Contig13427	147859	148147	Contig13427	145163	145164	Aqu2.1.32932_001	0	+	2696
Contig13427	150026	151000	Contig13427	145163	145164	Aqu2.1.32932_001	0	+	4863
Contig13427	151699	153019	Contig13427	145163	145164	Aqu2.1.32932_001	0	+	6536
Contig13427	155022	155536	Contig13427	145163	145164	Aqu2.1.32932_001	0	+	9859
Contig13427	156508	157053	Contig13427	145163	145164	Aqu2.1.32932_001	0	+	11345
Contig13427	159427	159660	Contig13427	171238	171239	Aqu2.1.32933_001	0	-	11579
Contig13427	164055	164721	Contig13427	171238	171239	Aqu2.1.32933_001	0	-	6518
Contig13427	229970	230471	Contig13427	229588	229589	Aqu2.1.32959_001	0	+	382
Contig13427	232642	233404	Contig13427	235738	235739	Aqu2.1.32960_001	0	-	2335
Contig13427	241386	242071	Contig13427	243566	243567	Aqu2.1.32962_001	0	-	1496
Contig13428	34928	35803	Contig13428	33885	33886	Aqu2.1.32981_001	0	+	1043
Contig13428	38132	38669	Contig13428	33885	33886	Aqu2.1.32981_001	0	+	4247
Contig13428	39615	39959	Contig13428	33885	33886	Aqu2.1.32981_001	0	+	5730
Contig13428	123869	124479	Contig13428	117453	117454	Aqu2.1.32998_001	0	-	6416
Contig13428	147866	148258	Contig13428	150215	150216	Aqu2.1.32999_001	0	-	1958
Contig13428	184620	184835	Contig13428	183768	183769	Aqu2.1.33009_001	0	-	852
Contig13428	194075	195020	Contig13428	192437	192438	Aqu2.1.33012_001	0	+	1638
Contig13428	198128	198971	Contig13428	203112	203113	Aqu2.1.33013_001	0	-	4142
Contig13428	200811	202114	Contig13428	203112	203113	Aqu2.1.33013_001	0	-	999
Contig13428	212268	212454	Contig13428	205395	205396	Aqu2.1.33014_001	0	-	6873
Contig13428	214871	215502	Contig13428	205395	205396	Aqu2.1.33014_001	0	-	9476
Contig13428	222315	222786	Contig13428	226365	226366	Aqu2.1.33015_001	0	-	3580
Contig13429	17331	18147	Contig13429	20163	20164	Aqu2.1.33029_001	0	+	2017
Contig13429	25069	25694	Contig13429	24539	24540	Aqu2.1.33032_001	0	+	530
Contig13429	86318	86613	Contig13429	90078	90079	Aqu2.1.33061_001	0	+	3466
Contig13429	88130	88650	Contig13429	90078	90079	Aqu2.1.33061_001	0	+	1429
Contig13429	191062	191321	Contig13429	189608	189609	Aqu2.1.33095_001	0	+	1454
Contig13430	22450	22762	Contig13430	25491	25492	Aqu2.1.33122_001	0	+	2730
Contig13431	64933	65174	Contig13431	66283	66284	Aqu2.1.33181_001	0	+	1110
Contig13432	122104	122573	Contig13432	125096	125097	Aqu2.1.33277_001	0	-	2524
Contig13433	55891	56277	Contig13433	54081	54082	Aqu2.1.33325_001	0	+	1810
Contig13433	225044	225446	Contig13433	227571	227572	Aqu2.1.33382_001	0	+	2126
Contig13434	6605	6922	Contig13434	13428	13429	Aqu2.1.33402_001	0	-	6507
Contig13434	101841	102313	Contig13434	101615	101616	Aqu2.1.33434_001	0	-	226
Contig13434	120631	121241	Contig13434	132547	132548	Aqu2.1.33439_001	0	-	11307
Contig13434	184283	184441	Contig13434	188217	188218	Aqu2.1.33448_001	0	-	3777
Contig13434	211598	213530	Contig13434	210619	210620	Aqu2.1.33460_001	0	+	979
Contig13434	229178	229343	Contig13434	228172	228173	Aqu2.1.33466_001	0	+	1006
Contig13434	248710	249587	Contig13434	246541	246542	Aqu2.1.33474_001	0	+	2169
Contig13435	28427	29710	Contig13435	30679	30680	Aqu2.1.33495_001	0	+	970
Contig13435	73784	74210	Contig13435	70381	70382	Aqu2.1.33506_001	0	-	3403
Contig13435	75079	75413	Contig13435	70381	70382	Aqu2.1.33506_001	0	-	4698
Contig13435	88933	89394	Contig13435	99683	99684	Aqu2.1.33507_001	0	-	10290
Contig13435	151399	152698	Contig13435	153301	153302	Aqu2.1.33518_001	0	+	604
Contig13435	181325	181597	Contig13435	183467	183468	Aqu2.1.33521_001	0	-	1871
Contig13435	199671	199990	Contig13435	198887	198888	Aqu2.1.33525_001	0	+	784
Contig13436	5199	5947	Contig13436	4753	4754	Aqu2.1.33558_001	0	-	446
Contig13436	29296	30453	Contig13436	28866	28867	Aqu2.1.33565_001	0	+	430
Contig13436	36896	37660	Contig13436	28866	28867	Aqu2.1.33565_001	0	+	8030
Contig13436	120164	120999	Contig13436	119884	119885	Aqu2.1.33591_001	0	-	280
Contig13436	154922	155669	Contig13436	156005	156006	Aqu2.1.33601_001	0	-	337
Contig13436	157618	158557	Contig13436	159848	159849	Aqu2.1.33603_001	0	+	1292
Contig13436	217644	218306	Contig13436	219766	219767	Aqu2.1.33626_001	0	-	1461
Contig13436	242103	242500	Contig13436	241431	241432	Aqu2.1.33639_001	0	+	672
Contig13436	260821	261621	Contig13436	256190	256191	Aqu2.1.33643_001	0	+	4631
Contig13436	263446	263989	Contig13436	268442	268443	Aqu2.1.33644_001	0	-	4454
Contig13437	94696	94981	Contig13437	96582	96583	Aqu2.1.33679_001	0	-	1602
Contig13437	207481	207636	Contig13437	212458	212459	Aqu2.1.33710_001	0	-	4823
Contig13437	252270	253115	Contig13437	256867	256868	Aqu2.1.33713_001	0	-	3753
Contig13438	42020	42874	Contig13438	35305	35306	Aqu2.1.33723_001	0	+	6715
Contig13438	90045	90465	Contig13438	90890	90891	Aqu2.1.33730_001	0	-	426
Contig13438	170454	170644	Contig13438	170017	170018	Aqu2.1.33760_001	0	-	437
Contig13440	206301	208662	Contig13440	196074	196075	Aqu2.1.33872_001	0	+	10227
Contig13440	213144	214743	Contig13440	220645	220646	Aqu2.1.33873_001	0	+	5903
Contig13440	216664	217213	Contig13440	220645	220646	Aqu2.1.33873_001	0	+	3433
Contig13440	246308	247271	Contig13440	245933	245934	Aqu2.1.33876_001	0	+	375
Contig13441	72467	73247	Contig13441	75361	75362	Aqu2.1.33896_001	0	+	2115
Contig13441	106105	106451	Contig13441	104303	104304	Aqu2.1.33904_001	0	+	1802
Contig13441	125135	126176	Contig13441	120521	120522	Aqu2.1.33910_001	0	+	4614
Contig13441	186593	187096	Contig13441	186245	186246	Aqu2.1.33929_001	0	-	348
Contig13441	190311	190627	Contig13441	193297	193298	Aqu2.1.33930_001	0	-	2671
Contig13441	191256	191661	Contig13441	193297	193298	Aqu2.1.33930_001	0	-	1637
Contig13441	222833	223288	Contig13441	227639	227640	Aqu2.1.33938_001	0	-	4352
Contig13442	19762	20220	Contig13442	19026	19027	Aqu2.1.33973_001	0	-	736
Contig13442	244645	246389	Contig13442	244382	244383	Aqu2.1.34032_001	0	-	263
Contig13442	248187	248497	Contig13442	247837	247838	Aqu2.1.34034_001	0	+	350
Contig13443	42775	43292	Contig13443	46142	46143	Aqu2.1.34056_001	0	-	2851
Contig13443	111844	112153	Contig13443	109525	109526	Aqu2.1.34076_001	0	-	2319
Contig13443	123092	123570	Contig13443	122770	122771	Aqu2.1.34078_001	0	-	322
Contig13443	157935	158135	Contig13443	171332	171333	Aqu2.1.34080_001	0	+	13198
Contig13443	227722	228457	Contig13443	226933	226934	Aqu2.1.34090_001	0	-	789
Contig13444	50032	51614	Contig13444	55954	55955	Aqu2.1.34133_001	0	-	4341
Contig13444	70777	71363	Contig13444	66057	66058	Aqu2.1.34136_001	0	+	4720
Contig13444	82555	84064	Contig13444	84805	84806	Aqu2.1.34137_001	0	-	742
Contig13444	105139	105720	Contig13444	107540	107541	Aqu2.1.34144_001	0	+	1821
Contig13444	120964	121155	Contig13444	120389	120390	Aqu2.1.34146_001	0	+	575
Contig13444	268739	270246	Contig13444	264630	264631	Aqu2.1.34172_001	0	+	4109
Contig13444	278829	279058	Contig13444	287717	287718	Aqu2.1.34173_001	0	+	8660
Contig13445	45232	46919	Contig13445	41306	41307	Aqu2.1.34188_001	0	+	3926
Contig13445	49631	50222	Contig13445	51903	51904	Aqu2.1.34189_001	0	+	1682
Contig13445	94973	95332	Contig13445	96761	96762	Aqu2.1.34195_001	0	+	1430
Contig13445	97674	98483	Contig13445	96799	96800	Aqu2.1.34194_001	0	-	875
Contig13445	185618	185861	Contig13445	184471	184472	Aqu2.1.34219_001	0	+	1147
Contig13446	83	844	Contig13446	3386	3387	Aqu2.1.34252_001	0	-	2543
Contig13446	7143	7510	Contig13446	3386	3387	Aqu2.1.34252_001	0	-	3757
Contig13446	13341	13819	Contig13446	3386	3387	Aqu2.1.34252_001	0	-	9955
Contig13446	86406	87571	Contig13446	84515	84516	Aqu2.1.34267_001	0	-	1891
Contig13446	109165	110356	Contig13446	107056	107057	Aqu2.1.34272_001	0	-	2109
Contig13446	109165	110356	Contig13446	107056	107057	Aqu2.1.34274_001	0	+	2109
Contig13446	112339	113420	Contig13446	107056	107057	Aqu2.1.34272_001	0	-	5283
Contig13446	112339	113420	Contig13446	107056	107057	Aqu2.1.34274_001	0	+	5283
Contig13446	139400	139890	Contig13446	143841	143842	Aqu2.1.34277_001	0	-	3952
Contig13446	194772	195391	Contig13446	195789	195790	Aqu2.1.34294_001	0	+	399
Contig13446	267549	268301	Contig13446	270349	270350	Aqu2.1.34312_001	0	+	2049
Contig13447	8705	9123	Contig13447	10075	10076	Aqu2.1.34331_001	0	-	953
Contig13447	12403	13583	Contig13447	10075	10076	Aqu2.1.34331_001	0	-	2328
Contig13447	16900	17378	Contig13447	20759	20760	Aqu2.1.34332_001	0	-	3382
Contig13447	18650	19255	Contig13447	20759	20760	Aqu2.1.34332_001	0	-	1505
Contig13447	106779	109096	Contig13447	113974	113975	Aqu2.1.34360_001	0	+	4879
Contig13447	142596	143422	Contig13447	144531	144532	Aqu2.1.34371_001	0	-	1110
Contig13447	145579	145756	Contig13447	144531	144532	Aqu2.1.34371_001	0	-	1048
Contig13447	243880	245103	Contig13447	249394	249395	Aqu2.1.34406_001	0	-	4292
Contig13447	254117	254267	Contig13447	252870	252871	Aqu2.1.34408_001	0	+	1247
Contig13447	263720	264552	Contig13447	263319	263320	Aqu2.1.34413_001	0	+	401
Contig13447	288102	288361	Contig13447	286324	286325	Aqu2.1.34418_001	0	-	1778
Contig13447	290025	290507	Contig13447	293614	293615	Aqu2.1.34416_001	0	-	3108
Contig13447	313510	313719	Contig13447	317776	317777	Aqu2.1.34424_001	0	+	4058
Contig13448	34020	34445	Contig13448	36357	36358	Aqu2.1.34435_001	0	-	1913
Contig13448	45851	46782	Contig13448	44146	44147	Aqu2.1.34441_001	0	+	1705
Contig13448	75289	76121	Contig13448	74090	74091	Aqu2.1.34449_001	0	+	1199
Contig13448	77730	78490	Contig13448	80455	80456	Aqu2.1.34450_001	0	-	1966
Contig13448	80894	81483	Contig13448	80615	80616	Aqu2.1.34451_001	0	+	279
Contig13448	91103	91422	Contig13448	89166	89167	Aqu2.1.34454_001	0	-	1937
Contig13448	189579	189749	Contig13448	187546	187547	Aqu2.1.34473_001	0	+	2033
Contig13448	228173	228573	Contig13448	229160	229161	Aqu2.1.34482_001	0	+	588
Contig13448	268502	268813	Contig13448	271040	271041	Aqu2.1.34490_001	0	+	2228
Contig13448	275557	276018	Contig13448	276365	276366	Aqu2.1.34491_001	0	-	348
Contig13448	278345	278939	Contig13448	276509	276510	Aqu2.1.34492_001	0	+	1836
Contig13448	283986	284187	Contig13448	288233	288234	Aqu2.1.34493_001	0	-	4047
Contig13450	56229	56552	Contig13450	63659	63660	Aqu2.1.34594_001	0	-	7108
Contig13450	60395	60562	Contig13450	63659	63660	Aqu2.1.34594_001	0	-	3098
Contig13450	86555	86917	Contig13450	87508	87509	Aqu2.1.34601_001	0	-	592
Contig13450	98651	99365	Contig13450	97406	97407	Aqu2.1.34605_001	0	+	1245
Contig13450	117931	118478	Contig13450	132998	132999	Aqu2.1.34606_001	0	-	14521
Contig13450	149136	149306	Contig13450	142724	142725	Aqu2.1.34609_001	0	+	6412
Contig13450	150416	152167	Contig13450	157400	157401	Aqu2.1.34610_001	0	+	5234
Contig13450	177062	177706	Contig13450	183236	183237	Aqu2.1.34615_001	0	+	5531
Contig13450	217208	217714	Contig13450	223912	223913	Aqu2.1.34620_001	0	-	6199
Contig13450	241126	241587	Contig13450	242458	242459	Aqu2.1.34624_001	0	-	872
Contig13451	117760	118285	Contig13451	115148	115149	Aqu2.1.34685_001	0	-	2612
Contig13451	119880	120073	Contig13451	122010	122011	Aqu2.1.34686_001	0	-	1938
Contig13452	92405	92561	Contig13452	94076	94077	Aqu2.1.34778_001	0	-	1516
Contig13452	106377	106560	Contig13452	110118	110119	Aqu2.1.34780_001	0	-	3559
Contig13452	112184	113353	Contig13452	110118	110119	Aqu2.1.34780_001	0	-	2066
Contig13452	309030	309391	Contig13452	306690	306691	Aqu2.1.34829_001	0	+	2340
Contig13453	9355	10306	Contig13453	12379	12380	Aqu2.1.34838_001	0	+	2074
Contig13453	49126	49608	Contig13453	50912	50913	Aqu2.1.34853_001	0	+	1305
Contig13453	127783	128463	Contig13453	126477	126478	Aqu2.1.34872_001	0	+	1306
Contig13453	160516	160809	Contig13453	160109	160110	Aqu2.1.34888_001	0	+	407
Contig13453	161782	162351	Contig13453	160109	160110	Aqu2.1.34888_001	0	+	1673
Contig13453	226609	227023	Contig13453	227552	227553	Aqu2.1.34915_001	0	-	530
Contig13453	313554	315121	Contig13453	310491	310492	Aqu2.1.34940_001	0	+	3063
Contig13453	316114	316739	Contig13453	320241	320242	Aqu2.1.34941_001	0	+	3503
Contig13454	195426	196267	Contig13454	193108	193109	Aqu2.1.34988_001	0	+	2318
Contig13454	246001	246934	Contig13454	245373	245374	Aqu2.1.35003_001	0	-	628
Contig13454	262222	262484	Contig13454	262855	262856	Aqu2.1.35005_001	0	+	372
Contig13455	24210	24588	Contig13455	28919	28920	Aqu2.1.35033_001	0	+	4332
Contig13455	53125	53923	Contig13455	49194	49195	Aqu2.1.35037_001	0	+	3931
Contig13455	87219	87540	Contig13455	90546	90547	Aqu2.1.35039_001	0	-	3007
Contig13455	98869	99061	Contig13455	99659	99660	Aqu2.1.35043_001	0	+	599
Contig13455	111057	111988	Contig13455	107469	107470	Aqu2.1.35044_001	0	-	3588
Contig13455	116817	117535	Contig13455	119548	119549	Aqu2.1.35046_001	0	-	2014
Contig13455	184964	185950	Contig13455	186300	186301	Aqu2.1.35054_001	0	-	351
Contig13455	293580	293896	Contig13455	287675	287676	Aqu2.1.35080_001	0	+	5905
Contig13455	306200	307099	Contig13455	310440	310441	Aqu2.1.35081_001	0	-	3342
Contig13456	12989	13219	Contig13456	14026	14027	Aqu2.1.35090_001	0	-	808
Contig13456	59546	60041	Contig13456	57704	57705	Aqu2.1.35111_001	0	+	1842
Contig13456	61864	62582	Contig13456	57704	57705	Aqu2.1.35111_001	0	+	4160
Contig13456	72686	73035	Contig13456	72021	72022	Aqu2.1.35109_001	0	-	665
Contig13456	225953	226137	Contig13456	223479	223480	Aqu2.1.35169_001	0	+	2474
Contig13456	284313	284601	Contig13456	287665	287666	Aqu2.1.35182_001	0	+	3065
Contig13456	328715	329507	Contig13456	325260	325261	Aqu2.1.35202_001	0	+	3455
Contig13457	27598	27908	Contig13457	35454	35455	Aqu2.1.35208_001	0	+	7547
Contig13457	30004	30875	Contig13457	35454	35455	Aqu2.1.35208_001	0	+	4580
Contig13457	52673	53158	Contig13457	62775	62776	Aqu2.1.35209_001	0	+	9618
Contig13457	53990	54250	Contig13457	62775	62776	Aqu2.1.35209_001	0	+	8526
Contig13457	123700	124343	Contig13457	126221	126222	Aqu2.1.35234_001	0	-	1879
Contig13457	159371	159722	Contig13457	158341	158342	Aqu2.1.35251_001	0	-	1030
Contig13457	159371	159722	Contig13457	158341	158342	Aqu2.1.35252_001	0	+	1030
Contig13457	161138	161542	Contig13457	158341	158342	Aqu2.1.35251_001	0	-	2797
Contig13457	161138	161542	Contig13457	158341	158342	Aqu2.1.35252_001	0	+	2797
Contig13457	222661	222965	Contig13457	218957	218958	Aqu2.1.35271_001	0	+	3704
Contig13457	242152	242665	Contig13457	238368	238369	Aqu2.1.35275_001	0	+	3784
Contig13457	306501	307335	Contig13457	304799	304800	Aqu2.1.35286_001	0	+	1702
Contig13457	329700	329985	Contig13457	332162	332163	Aqu2.1.35293_001	0	+	2178
Contig13458	168857	169140	Contig13458	167133	167134	Aqu2.1.35346_001	0	+	1724
Contig13458	222858	224378	Contig13458	225838	225839	Aqu2.1.35356_001	0	-	1461
Contig13458	226409	228058	Contig13458	225838	225839	Aqu2.1.35356_001	0	-	571
Contig13458	276273	276603	Contig13458	275249	275250	Aqu2.1.35372_001	0	-	1024
Contig13458	334365	334808	Contig13458	335294	335295	Aqu2.1.35396_001	0	+	487
Contig13458	342798	343287	Contig13458	342267	342268	Aqu2.1.35397_001	0	+	531
Contig13459	150218	150672	Contig13459	148171	148172	Aqu2.1.35436_001	0	+	2047
Contig13460	78283	78859	Contig13460	79682	79683	Aqu2.1.35499_001	0	-	824
Contig13460	143193	143875	Contig13460	145981	145982	Aqu2.1.35521_001	0	-	2107
[truncated: 843 more rows]
