# Supplementary material for: Landscape of histone modifications in a sponge reveals the origin of animal cis-regulatory complexity
Source: eLife. 2017 Apr 11;6:e22194. doi: 10.7554/eLife.22194 (PMC5429095; doi:10.7554/eLife.22194)
Supplement: Figure 6—source data 2. — DOI: http://dx.doi.org/10.7554/eLife.22194.030 [file elife-22194-fig6-data2.xlsx]

## Sheet: Figure 6-Source Data 2
Figure 6-source data 2. Functional annotation of nearest neighbors genes of the adult predicted activated enhancer-like elements.
Seq. Name	Seq. Description	Seq. Length	#Hits	min. eValue	mean Similarity	#GOs	GOs	Enzyme Codes	InterProScan
Aqu2.1.08473_001	retrotransposon ty3-gypsy subclass	434	20	1.55203e-09	0.4085	2	F:GO:0003676; F:GO:0008270		Coil (COILS); IPR001878 (SMART); IPR001878 (G3DSA:4.10.60.GENE3D); IPR001878 (PFAM); PTHR10178 (PANTHER); IPR001878 (PROSITE_PROFILES); IPR001878 (SUPERFAMILY)
Aqu2.1.09575_001	clustered mitochondria protein homolog	157	20	7.23073e-30	0.6145	2	P:GO:0009987; F:GO:0005515	-	IPR011990 (G3DSA:1.25.40.GENE3D); PF12807 (PFAM); PF13424 (PFAM); PTHR12601 (PANTHER); PTHR12601:SF6 (PANTHER); SSF48452 (SUPERFAMILY)
Aqu2.1.11108_001	ankyrin unc44	434	20	3.8584e-98	0.496	1	F:GO:0005515		IPR002110 (SMART); IPR002110 (PFAM); PF13637 (PFAM); IPR020683 (G3DSA:1.25.40.GENE3D); IPR020683 (PFAM); PTHR24198 (PANTHER); IPR002110 (PROSITE_PROFILES); IPR020683 (PROSITE_PROFILES); IPR020683 (SUPERFAMILY)
Aqu2.1.11456_001	uncharacterized protein partial	120	5	5.38836e-09	0.564	4	P:GO:0006508; F:GO:0008234; F:GO:0046872; F:GO:0008270		SSF54001 (SUPERFAMILY)
Aqu2.1.11697_001	serine threonine-protein phosphatase 6 regulatory ankyrin repeat subunit b-like	651	20	0	0.7115	1	F:GO:0005515		IPR002110 (PRINTS); IPR002110 (SMART); IPR020683 (G3DSA:1.25.40.GENE3D); IPR020683 (PFAM); IPR002110 (PFAM); IPR020683 (G3DSA:1.25.40.GENE3D); IPR020683 (G3DSA:1.25.40.GENE3D); PTHR24182 (PANTHER); IPR002110 (PROSITE_PROFILES); IPR002110 (PROSITE_PROFILES); IPR002110 (PROSITE_PROFILES); IPR020683 (PROSITE_PROFILES); IPR002110 (PROSITE_PROFILES); IPR002110 (PROSITE_PROFILES); IPR002110 (PROSITE_PR…
Aqu2.1.12026_001	PREDICTED: hypothetical protein LOC100631586 [Amphimedon queenslandica]	34	1	1.09205e-11	0.94	0	-		no IPS match
Aqu2.1.12386_001	ankyrin repeat domain protein	66	20	2.16523e-08	0.6335	1	F:GO:0005515		IPR002110 (SMART); IPR020683 (G3DSA:1.25.40.GENE3D); IPR020683 (PFAM); PTHR24188 (PANTHER); IPR020683 (PROSITE_PROFILES); IPR002110 (PROSITE_PROFILES); IPR020683 (SUPERFAMILY)
Aqu2.1.12775_001	hydrocephalus-inducing protein homolog	258	19	4.78552e-90	0.575263	4	P:GO:0009199; P:GO:0009119; F:GO:0016787; P:GO:0009259	-	no IPS match
Aqu2.1.12833_001	ankyrin-1- partial	516	20	2.29212e-53	0.475	1	F:GO:0005515		IPR002110 (SMART); IPR020683 (G3DSA:1.25.40.GENE3D); IPR020683 (PFAM); IPR020683 (G3DSA:1.25.40.GENE3D); IPR020683 (G3DSA:1.25.40.GENE3D); PTHR24123 (PANTHER); IPR002110 (PROSITE_PROFILES); IPR002110 (PROSITE_PROFILES); IPR002110 (PROSITE_PROFILES); IPR020683 (PROSITE_PROFILES); IPR002110 (PROSITE_PROFILES); IPR020683 (SUPERFAMILY); IPR020683 (SUPERFAMILY)
Aqu2.1.12864_001	angiogenic factor with g patch and fha domains 1-like	232	20	9.857e-128	0.5735	4	P:GO:0044699; P:GO:0032502; F:GO:0003676; F:GO:0005515	-	IPR000467 (SMART); IPR000253 (G3DSA:2.60.200.GENE3D); IPR000467 (PFAM); PTHR23106:SF2 (PANTHER); PTHR23106 (PANTHER); IPR000467 (PROSITE_PROFILES)
Aqu2.1.13093_001	ankyrin repeat and ibr domain-containing protein 1-like	317	1	3.57257e-08	0.47	2	F:GO:0046872; F:GO:0008270		Coil (COILS); TRANSMEMBRANE (PHOBIUS); TRANSMEMBRANE (PHOBIUS); CYTOPLASMIC_DOMAIN (PHOBIUS); NON_CYTOPLASMIC_DOMAIN (PHOBIUS); CYTOPLASMIC_DOMAIN (PHOBIUS); TRANSMEMBRANE (PHOBIUS); NON_CYTOPLASMIC_DOMAIN (PHOBIUS); SignalP-noTM (SIGNALP_EUK); TMhelix (TMHMM); TMhelix (TMHMM); TMhelix (TMHMM)
Aqu2.1.13094_001	tetratricopeptide repeat protein 7b-like	367	20	6.79224e-73	0.6145	6	P:GO:0009199; P:GO:0009119; F:GO:0016787; P:GO:0043170; P:GO:0009165; P:GO:0009259	-	NON_CYTOPLASMIC_DOMAIN (PHOBIUS); CYTOPLASMIC_DOMAIN (PHOBIUS); TRANSMEMBRANE (PHOBIUS); TMhelix (TMHMM)
Aqu2.1.13275_001	---NA---	61	0			0	-		no IPS match
Aqu2.1.13390_001	reverse partial	70	20	8.21617e-15	0.707	3	F:GO:0003723; P:GO:0006278; F:GO:0003964		PTHR19446 (PANTHER)
Aqu2.1.13391_001	atp-dependent dna helicase	79	20	1.05687e-17	0.5555	1	F:GO:0016787	-	G3DSA:3.40.50.300 (GENE3D)
Aqu2.1.13392_001	atp-dependent dna helicase	79	20	1.05687e-17	0.5555	1	F:GO:0016787	-	G3DSA:3.40.50.300 (GENE3D)
Aqu2.1.13733_001	PREDICTED: hypothetical protein LOC100642031 [Amphimedon queenslandica]	62	1	5.40733e-35	1	0	-		no IPS match
Aqu2.1.14626_001	nuclease harbi1-like	100	20	2.89227e-11	0.6295	4	P:GO:0090305; F:GO:0008270; F:GO:0004518; F:GO:0003677		no IPS match
Aqu2.1.15373_001	---NA---	68	0			0	-		no IPS match
Aqu2.1.16220_001	-like protein subfamily c member 5	182	1	1.51496e-05	0.47	0	-		no IPS match
Aqu2.1.16221_001	-like protein subfamily c member 5	182	1	1.51496e-05	0.47	0	-		no IPS match
Aqu2.1.16430_001	tetratricopeptide repeat protein 7b-like	540	20	8.16525e-87	0.603	5	P:GO:0009199; P:GO:0009119; F:GO:0016787; P:GO:0009165; P:GO:0009259	-	IPR002181 (SMART); IPR014716 (G3DSA:3.90.215.GENE3D); CYTOPLASMIC_DOMAIN (PHOBIUS); TRANSMEMBRANE (PHOBIUS); NON_CYTOPLASMIC_DOMAIN (PHOBIUS); IPR002181 (SUPERFAMILY); TMhelix (TMHMM)
Aqu2.1.17019_001	---NA---	81	0			0	-		no IPS match
Aqu2.1.17150_001	type 11 methyltransferase	254	20	0	0.521	5	F:GO:0008168; F:GO:0016740; P:GO:0032259; P:GO:0008152; P:GO:0009234		G3DSA:3.40.50.150 (GENE3D); IPR025714 (PFAM); PTHR10108 (PANTHER); SSF53335 (SUPERFAMILY)
Aqu2.1.17524_001	nadph oxidase 5-like	743	20	0	0.713	3	F:GO:0005509; F:GO:0016491; P:GO:0055114	-	IPR002048 (SMART); IPR011992 (PFAM); IPR011992 (G3DSA:1.10.238.GENE3D); G3DSA:2.40.30.10 (GENE3D); IPR002048 (PFAM); IPR011992 (G3DSA:1.10.238.GENE3D); IPR013112 (PFAM); IPR013130 (PFAM); PTHR11972 (PANTHER); PTHR11972:SF4 (PANTHER); IPR018247 (PROSITE_PATTERNS); IPR018247 (PROSITE_PATTERNS); IPR018247 (PROSITE_PATTERNS); TRANSMEMBRANE (PHOBIUS); NON_CYTOPLASMIC_DOMAIN (PHOBIUS); TRANSMEMBRANE (P…
Aqu2.1.17693_001	nicotinamide n-methyltransferase	262	20	3.32671e-31	0.5205	3	P:GO:0042221; P:GO:0008152; F:GO:0008168	-	IPR000940 (PFAM); G3DSA:3.40.50.150 (GENE3D); IPR000940 (PANTHER); PTHR10867:SF10 (PANTHER); SSF53335 (SUPERFAMILY)
Aqu2.1.17694_001	coproporphyrinogen-iii oxidase-like	408	20	0	0.779	5	P:GO:0006783; F:GO:0004109; C:GO:0005739; P:GO:0055114; P:GO:0015994	EC:1.3.3.3	IPR001260 (PRINTS); IPR001260 (G3DSA:3.40.1500.GENE3D); IPR001260 (PFAM); IPR001260 (PANTHER); PTHR10755:SF0 (PANTHER); IPR018375 (PROSITE_PATTERNS); CYTOPLASMIC_DOMAIN (PHOBIUS); TRANSMEMBRANE (PHOBIUS); NON_CYTOPLASMIC_DOMAIN (PHOBIUS); SignalP-TM (SIGNALP_GRAM_POSITIVE); IPR001260 (SUPERFAMILY)
Aqu2.1.18432_001	utrophin isoform x4	160	20	5.49755e-14	0.5175	1	F:GO:0005509		IPR015154 (PFAM); IPR011992 (G3DSA:1.10.238.GENE3D); IPR015153 (PFAM); CYTOPLASMIC_DOMAIN (PHOBIUS); TRANSMEMBRANE (PHOBIUS); NON_CYTOPLASMIC_DOMAIN (PHOBIUS); SSF47473 (SUPERFAMILY); TMhelix (TMHMM)
Aqu2.1.18808_001	PREDICTED: hypothetical protein LOC100635498, partial [Amphimedon queenslandica]	380	3	1.43985e-15	0.68	0	-		Coil (COILS); Coil (COILS); Coil (COILS); G3DSA:1.20.5.990 (GENE3D)
Aqu2.1.18815_001	zinc-binding alcohol dehydrogenase domain-containing protein 2	286	15	6.98679e-39	0.505333	0	-		Coil (COILS)
Aqu2.1.18821_001	repressor of rna polymerase iii transcription maf1 homolog	277	20	0	0.705	1	P:GO:0016480	-	IPR015257 (PFAM); PTHR22504:SF0 (PANTHER); IPR015257 (PANTHER)
Aqu2.1.18860_001	PREDICTED: hypothetical protein LOC100639045, partial [Amphimedon queenslandica]	1139	6	7.92075e-78	0.588333	1	F:GO:0005515		IPR003961 (SMART); IPR013783 (G3DSA:2.60.40.GENE3D); IPR013320 (G3DSA:2.60.120.GENE3D); PF15330 (PFAM); IPR013783 (G3DSA:2.60.40.GENE3D); SIGNAL_PEPTIDE_H_REGION (PHOBIUS); TRANSMEMBRANE (PHOBIUS); SIGNAL_PEPTIDE_N_REGION (PHOBIUS); SIGNAL_PEPTIDE_C_REGION (PHOBIUS); NON_CYTOPLASMIC_DOMAIN (PHOBIUS); SIGNAL_PEPTIDE (PHOBIUS); CYTOPLASMIC_DOMAIN (PHOBIUS); IPR003961 (PROSITE_PROFILES); IPR003961 (…
Aqu2.1.19008_001	nidogen and egf-like domain-containing protein 1	225	20	4.71935e-82	0.496	8	P:GO:0007160; F:GO:0005509; F:GO:0030246; P:GO:0007156; C:GO:0016021; P:GO:0007155; C:GO:0016020; C:GO:0005886		no IPS match
Aqu2.1.19097_001	receptor-type tyrosine-protein phosphatase f isoform x6	872	20	6.08604e-40	0.473	1	F:GO:0005515		PR00014 (PRINTS); IPR003961 (SMART); IPR013783 (G3DSA:2.60.40.GENE3D); IPR003961 (PFAM); IPR013783 (G3DSA:2.60.40.GENE3D); IPR013783 (G3DSA:2.60.40.GENE3D); PTHR10489 (PANTHER); CYTOPLASMIC_DOMAIN (PHOBIUS); NON_CYTOPLASMIC_DOMAIN (PHOBIUS); SIGNAL_PEPTIDE_C_REGION (PHOBIUS); TRANSMEMBRANE (PHOBIUS); SIGNAL_PEPTIDE (PHOBIUS); SIGNAL_PEPTIDE_N_REGION (PHOBIUS); SIGNAL_PEPTIDE_H_REGION (PHOBIUS); I…
Aqu2.1.19140_001	caax prenyl protease 2-like	270	20	0	0.6115	4	C:GO:0030915; C:GO:0016020; C:GO:0005634; P:GO:0006281	-	IPR003675 (PFAM); PTHR13046:SF0 (PANTHER); PTHR13046 (PANTHER); CYTOPLASMIC_DOMAIN (PHOBIUS); TRANSMEMBRANE (PHOBIUS); CYTOPLASMIC_DOMAIN (PHOBIUS); NON_CYTOPLASMIC_DOMAIN (PHOBIUS); TRANSMEMBRANE (PHOBIUS); TRANSMEMBRANE (PHOBIUS); NON_CYTOPLASMIC_DOMAIN (PHOBIUS); NON_CYTOPLASMIC_DOMAIN (PHOBIUS); TRANSMEMBRANE (PHOBIUS); TRANSMEMBRANE (PHOBIUS); TRANSMEMBRANE (PHOBIUS); NON_CYTOPLASMIC_DOMAIN …
Aqu2.1.19192_001	uncharacterized protein loc102804431	1876	14	8.04597e-89	0.525	1	P:GO:0035556		Coil (COILS); IPR014772 (PROSITE_PROFILES)
Aqu2.1.19198_001	hexokinase	441	20	0	0.64	13	F:GO:0004396; P:GO:0060361; F:GO:0005524; P:GO:0006096; P:GO:0016310; P:GO:0005982; P:GO:0005985; P:GO:0006000; P:GO:0006012; P:GO:0006013; P:GO:0006040; P:GO:0006094; P:GO:0019872	EC:2.7.1.1	IPR001312 (PRINTS); G3DSA:3.40.367.20 (GENE3D); IPR022672 (PFAM); IPR022673 (PFAM); G3DSA:3.30.420.40 (GENE3D); IPR001312 (PANTHER); IPR019807 (PROSITE_PATTERNS); SSF53067 (SUPERFAMILY)
Aqu2.1.19235_001	v8-like glu-specific endopeptidase	416	20	8.14739e-22	0.4515	1	F:GO:0003824		G3DSA:2.40.10.10 (GENE3D); IPR009003 (SUPERFAMILY)
Aqu2.1.19430_001	regulator of g-protein signaling 16	1145	20	0	0.634	6	F:GO:0005089; F:GO:0005543; P:GO:0038032; P:GO:0035023; P:GO:0043087; F:GO:0005515	-	Coil (COILS); IPR000342 (PRINTS); IPR016137 (SMART); IPR001478 (SMART); IPR001849 (SMART); G3DSA:2.60.40.150 (GENE3D); G3DSA:2.30.42.10 (GENE3D); IPR001478 (PFAM); IPR000219 (PFAM); IPR000342 (PFAM); G3DSA:1.10.167.10 (GENE3D); IPR024066 (G3DSA:1.10.196.GENE3D); IPR000219 (G3DSA:1.20.900.GENE3D); IPR011993 (G3DSA:2.30.29.GENE3D); PTHR10845 (PANTHER); IPR016137 (PROSITE_PROFILES); IPR000219 (PROSI…
Aqu2.1.19531_001	3-mercaptopyruvate sulfurtransferase	295	20	0	0.626	2	F:GO:0004792; F:GO:0016740		IPR001763 (SMART); IPR001763 (PFAM); IPR001763 (G3DSA:3.40.250.GENE3D); PTHR11364:SF0 (PANTHER); PTHR11364 (PANTHER); IPR001763 (PROSITE_PROFILES); IPR001763 (SUPERFAMILY)
Aqu2.1.19545_001	AGAP000003-PA [Anopheles gambiae str. PEST]	196	5	1.74701e-09	0.766	0	-		Coil (COILS); Coil (COILS)
Aqu2.1.20047_001	biogenesis of lysosome-related organelles complex-1 subunit 2-like	135	20	1.3635e-91	0.723	0	-		Coil (COILS); Coil (COILS); IPR019269 (PFAM); PTHR10668 (PANTHER)
Aqu2.1.20120_001	PREDICTED: hypothetical protein LOC100639577 [Amphimedon queenslandica]	343	3	2.86183e-13	0.49	0	-		NON_CYTOPLASMIC_DOMAIN (PHOBIUS); CYTOPLASMIC_DOMAIN (PHOBIUS); TRANSMEMBRANE (PHOBIUS); TMhelix (TMHMM)
Aqu2.1.20152_001	docking protein 4	282	8	3.77772e-05	0.4225	0	-		IPR001849 (SMART); IPR001849 (PFAM); IPR011993 (G3DSA:2.30.29.GENE3D); IPR001849 (PROSITE_PROFILES); SSF50729 (SUPERFAMILY)
Aqu2.1.20197_001	heat shock 70 kda protein 12a	478	20	0	0.483	1	P:GO:0007165		IPR013126 (PFAM); G3DSA:3.30.420.40 (GENE3D); G3DSA:3.30.420.40 (GENE3D); PTHR14187 (PANTHER); PTHR14187:SF36 (PANTHER); SSF53067 (SUPERFAMILY); SSF53067 (SUPERFAMILY)
Aqu2.1.20221_001	methylthioribose-1-phosphate isomerase-like	352	20	0	0.7375	4	P:GO:0009086; C:GO:0016021; F:GO:0016853; C:GO:0044424	-	G3DSA:3.40.50.10470 (GENE3D); IPR027363 (G3DSA:1.20.120.GENE3D); IPR011559 (TIGRFAM); IPR005251 (TIGRFAM); IPR000649 (PFAM); PTHR10233 (PANTHER); PTHR10233:SF6 (PANTHER); IPR005251 (HAMAP); SSF100950 (SUPERFAMILY)
Aqu2.1.20237_001	uncharacterized protein partial	455	20	1.42824e-123	0.6885	10	F:GO:0003723; F:GO:0008270; P:GO:0006278; P:GO:0006355; F:GO:0003964; F:GO:0003700; P:GO:0015074; C:GO:0005634; C:GO:0005667; P:GO:0045449	EC:2.7.7.49	IPR000477 (PFAM); G3DSA:3.30.70.270 (GENE3D); G3DSA:3.10.10.10 (GENE3D); PTHR10178:SF26 (PANTHER); PTHR10178 (PANTHER); IPR000477 (PROSITE_PROFILES); SSF56672 (SUPERFAMILY)
Aqu2.1.20355_001	e3 ubiquitin-protein ligase hectd1	2122	20	0	0.6305	4	F:GO:0005515; F:GO:0004842; F:GO:0046872; P:GO:0016567		IPR002110 (SMART); IPR000569 (SMART); IPR011989 (G3DSA:1.25.10.GENE3D); IPR012919 (PFAM); IPR020683 (PFAM); G3DSA:3.30.2160.10 (GENE3D); IPR010606 (PFAM); IPR008979 (G3DSA:2.60.120.GENE3D); IPR020683 (G3DSA:1.25.40.GENE3D); IPR000569 (PFAM); PTHR11254:SF75 (PANTHER); PTHR11254 (PANTHER); IPR000569 (PROSITE_PROFILES); IPR010606 (PROSITE_PROFILES); IPR002110 (PROSITE_PROFILES); IPR002110 (PROSITE_P…
Aqu2.1.20356_001	FOS	206	20	1.91682e-148	0.6205	6	F:GO:0003700; F:GO:0043565; C:GO:0005634; P:GO:0006355; C:GO:0005667; P:GO:0045449	-	Coil (COILS); IPR000837 (PRINTS); IPR004827 (SMART); G3DSA:1.20.5.170 (GENE3D); IPR004827 (PFAM); PTHR23351 (PANTHER); PTHR23351:SF15 (PANTHER); IPR004827 (PROSITE_PATTERNS); IPR004827 (PROSITE_PROFILES); SSF57959 (SUPERFAMILY)
Aqu2.1.21079_001	neurotrypsin-like	832	20	0	0.521	3	F:GO:0016884; C:GO:0016020; F:GO:0005044	EC:6.3.5.0	IPR001190 (PRINTS); PR01217 (PRINTS); IPR017448 (SMART); G3DSA:3.10.250.10 (GENE3D); IPR001190 (PFAM); PTHR19331:SF16 (PANTHER); PTHR19331 (PANTHER); IPR001190 (PROSITE_PATTERNS); SIGNAL_PEPTIDE_N_REGION (PHOBIUS); SIGNAL_PEPTIDE_C_REGION (PHOBIUS); CYTOPLASMIC_DOMAIN (PHOBIUS); SIGNAL_PEPTIDE_H_REGION (PHOBIUS); NON_CYTOPLASMIC_DOMAIN (PHOBIUS); SIGNAL_PEPTIDE (PHOBIUS); TRANSMEMBRANE (PHOBIUS);…
Aqu2.1.21080_001	loc779081 protein	2780	20	0	0.809	8	C:GO:0005737; P:GO:0001955; F:GO:0003723; P:GO:0051151; P:GO:0019048; C:GO:0005634; P:GO:0007492; F:GO:0005515	-	Coil (COILS); IPR002110 (PRINTS); IPR001660 (SMART); IPR002110 (SMART); IPR004087 (SMART); IPR013761 (G3DSA:1.10.150.GENE3D); G3DSA:3.30.1370.10 (GENE3D); IPR004088 (PFAM); IPR002110 (PFAM); IPR020683 (G3DSA:1.25.40.GENE3D); IPR020683 (PFAM); IPR020683 (G3DSA:1.25.40.GENE3D); IPR020683 (G3DSA:1.25.40.GENE3D); IPR020683 (G3DSA:1.25.40.GENE3D); IPR021129 (PFAM); PTHR23206:SF0 (PANTHER); PTHR23206 (…
Aqu2.1.21085_001	aldehyde dehydrogenase family 16 member a1-like	423	20	0	0.828	2	F:GO:0016620; P:GO:0055114	EC:1.2.1.0	IPR016163 (G3DSA:3.40.309.GENE3D); IPR015590 (PFAM); IPR016162 (G3DSA:3.40.605.GENE3D); PTHR11699:SF98 (PANTHER); PTHR11699 (PANTHER); IPR016160 (PROSITE_PATTERNS); IPR016160 (PROSITE_PATTERNS); CYTOPLASMIC_DOMAIN (PHOBIUS); NON_CYTOPLASMIC_DOMAIN (PHOBIUS); TRANSMEMBRANE (PHOBIUS); IPR016161 (SUPERFAMILY); TMhelix (TMHMM)
Aqu2.1.21246_001	---NA---	69	0			0	-		no IPS match
Aqu2.1.21264_001	ARID3A	495	20	0	0.765	3	P:GO:0006351; F:GO:0003677; C:GO:0005634	-	Coil (COILS); IPR001606 (SMART); SM01014 (SMART); IPR001606 (PFAM); IPR001606 (G3DSA:1.10.150.GENE3D); PTHR15348 (PANTHER); IPR001606 (PROSITE_PROFILES); IPR001606 (SUPERFAMILY)
Aqu2.1.21266_001	adamts-like protein 2	874	20	0	0.4875	1	F:GO:0005515		IPR003599 (SMART); IPR000884 (SMART); IPR013783 (G3DSA:2.60.40.GENE3D); PF13895 (PFAM); IPR000884 (PFAM); IPR013783 (G3DSA:2.60.40.GENE3D); IPR013783 (G3DSA:2.60.40.GENE3D); G3DSA:2.20.100.10 (GENE3D); IPR013783 (G3DSA:2.60.40.GENE3D); PTHR13723 (PANTHER); PTHR13723:SF34 (PANTHER); NON_CYTOPLASMIC_DOMAIN (PHOBIUS); SIGNAL_PEPTIDE_N_REGION (PHOBIUS); SIGNAL_PEPTIDE (PHOBIUS); SIGNAL_PEPTIDE_H_REGI…
Aqu2.1.21442_001	---NA---	139	0			0	-		SignalP-TM (SIGNALP_GRAM_POSITIVE)
Aqu2.1.21524_001	deleted in malignant brain tumors 1	1578	20	0	0.525	9	F:GO:0005515; P:GO:0044699; C:GO:0016020; P:GO:0006955; C:GO:0005737; P:GO:0009987; P:GO:0006952; F:GO:0005044; F:GO:0030247	-	IPR001190 (PRINTS); IPR017448 (SMART); IPR003961 (SMART); IPR001190 (PFAM); IPR013783 (G3DSA:2.60.40.GENE3D); IPR003961 (PFAM); G3DSA:3.10.250.10 (GENE3D); IPR013783 (G3DSA:2.60.40.GENE3D); PTHR19331:SF192 (PANTHER); PTHR19331 (PANTHER); IPR001190 (PROSITE_PATTERNS); IPR001212 (PROSITE_PATTERNS); IPR001190 (PROSITE_PATTERNS); IPR001190 (PROSITE_PATTERNS); SIGNAL_PEPTIDE_N_REGION (PHOBIUS); NON_CY…
Aqu2.1.21553_001	tripartite motif-containing protein 71-like	1409	20	5.24148e-156	0.6255	3	C:GO:0005622; F:GO:0008270; F:GO:0005515		Coil (COILS); Coil (COILS); IPR000315 (SMART); IPR018391 (SMART); IPR001841 (SMART); IPR003649 (SMART); PF13570 (PFAM); IPR001258 (PFAM); IPR000315 (PFAM); IPR013083 (G3DSA:3.30.40.GENE3D); IPR011042 (G3DSA:2.120.10.GENE3D); IPR001841 (PFAM); IPR027295 (G3DSA:2.140.10.GENE3D); PTHR24103 (PANTHER); PTHR24103:SF134 (PANTHER); IPR017907 (PROSITE_PATTERNS); IPR017907 (PROSITE_PATTERNS); NON_CYTOPLASM…
Aqu2.1.21722_001	---NA---	69	0			0	-		NON_CYTOPLASMIC_DOMAIN (PHOBIUS); CYTOPLASMIC_DOMAIN (PHOBIUS); TRANSMEMBRANE (PHOBIUS); TMhelix (TMHMM)
Aqu2.1.21886_001	insulin receptor substrate 1	657	8	0	0.52375	1	F:GO:0005158		IPR001849 (SMART); IPR011993 (G3DSA:2.30.29.GENE3D); IPR002404 (PFAM); SSF50729 (SUPERFAMILY)
Aqu2.1.21887_001	PREDICTED: hypothetical protein LOC100638142 [Amphimedon queenslandica]	115	1	9.48134e-71	1	1	F:GO:0046872	-	SignalP-TM (SIGNALP_GRAM_POSITIVE)
Aqu2.1.22213_001	peptidase m35	299	20	1.95349e-39	0.454	1	F:GO:0008237		IPR024079 (G3DSA:3.40.390.GENE3D); SSF55486 (SUPERFAMILY)
Aqu2.1.22251_001	otu domain-containing protein 4	1092	20	5.35724e-29	0.484	0	-		IPR003323 (PFAM); PTHR12419 (PANTHER); PTHR12419:SF0 (PANTHER); IPR003323 (PROSITE_PROFILES); SSF54001 (SUPERFAMILY)
Aqu2.1.22391_001	tetratricopeptide repeat protein 7b-like	229	19	1.66023e-61	0.600526	5	P:GO:0009199; P:GO:0009119; F:GO:0016787; P:GO:0009165; P:GO:0009259	-	no IPS match
Aqu2.1.22429_001	deleted in malignant brain tumors 1	479	20	8.95857e-73	0.516	2	C:GO:0016020; F:GO:0005044		IPR001190 (PRINTS); IPR017448 (SMART); IPR001190 (PFAM); G3DSA:3.10.250.10 (GENE3D); PTHR19331 (PANTHER); PTHR19331:SF151 (PANTHER); IPR001190 (PROSITE_PATTERNS); TRANSMEMBRANE (PHOBIUS); CYTOPLASMIC_DOMAIN (PHOBIUS); SIGNAL_PEPTIDE_C_REGION (PHOBIUS); SIGNAL_PEPTIDE_N_REGION (PHOBIUS); SIGNAL_PEPTIDE (PHOBIUS); SIGNAL_PEPTIDE_H_REGION (PHOBIUS); NON_CYTOPLASMIC_DOMAIN (PHOBIUS); IPR001190 (PROSI…
Aqu2.1.22480_001	general transcription factor iih subunit 5	74	20	4.83734e-43	0.758	3	P:GO:0006289; P:GO:0006355; C:GO:0000439	-	IPR009400 (PFAM); IPR009400 (G3DSA:3.30.70.GENE3D); IPR009400 (SUPERFAMILY)
Aqu2.1.22805_001	---NA---	27	0			0	-		no IPS match
Aqu2.1.22806_001	a disintegrin and metalloproteinase with thrombospondin motifs 6	863	20	0	0.519	4	F:GO:0004222; C:GO:0005578; P:GO:0006508; F:GO:0008270	EC:3.4.24.0	IPR013273 (PRINTS); PR01705 (PRINTS); IPR000884 (SMART); G3DSA:2.20.100.10 (GENE3D); IPR001590 (PFAM); IPR000884 (PFAM); IPR010294 (PFAM); IPR024079 (G3DSA:3.40.390.GENE3D); PTHR13723:SF4 (PANTHER); PTHR13723 (PANTHER); NON_CYTOPLASMIC_DOMAIN (PHOBIUS); SIGNAL_PEPTIDE_N_REGION (PHOBIUS); SIGNAL_PEPTIDE_C_REGION (PHOBIUS); SIGNAL_PEPTIDE (PHOBIUS); SIGNAL_PEPTIDE_H_REGION (PHOBIUS); IPR000884 (PRO…
Aqu2.1.22997_001	hypothetical protein NAEGRDRAFT_80317 [Naegleria gruberi]	1330	2	6.55709e-51	0.43	0	-		no IPS match
Aqu2.1.23008_001	---NA---	49	0			0	-		Coil (COILS)
Aqu2.1.23216_001	---NA---	171	0			0	-		Coil (COILS)
Aqu2.1.23217_001	midnolin isoform x2	547	20	1.88111e-20	0.6375	1	F:GO:0005515		Coil (COILS); IPR000626 (SMART); IPR000626 (PFAM); G3DSA:3.10.20.90 (GENE3D); PTHR23010 (PANTHER); PTHR23010:SF0 (PANTHER); IPR000626 (PROSITE_PROFILES); SSF54236 (SUPERFAMILY)
Aqu2.1.23374_001	exocyst complex component 2	383	20	3.47071e-22	0.542	1	F:GO:0005515		Coil (COILS); IPR002909 (SMART); IPR000008 (SMART); IPR002909 (PFAM); G3DSA:2.60.40.150 (GENE3D); IPR013783 (G3DSA:2.60.40.GENE3D); IPR000008 (PFAM); IPR019018 (PROSITE_PROFILES); IPR000008 (SUPERFAMILY); IPR014756 (SUPERFAMILY)
Aqu2.1.23392_001	myocyte-specific enhancer factor 2a-like isoform x1	588	20	0	0.562	7	P:GO:0045944; P:GO:0007507; P:GO:0030239; F:GO:0046983; P:GO:0001756; F:GO:0000976; C:GO:0005634	-	Coil (COILS); IPR002100 (PRINTS); IPR002100 (SMART); IPR002100 (PFAM); PTHR11945 (PANTHER); PTHR11945:SF38 (PANTHER); IPR002100 (PROSITE_PATTERNS); IPR002100 (PROSITE_PROFILES); IPR002100 (SUPERFAMILY)
Aqu2.1.23393_001	uncharacterized protein loc100378553	597	3	0	0.793333	1	F:GO:0005515		Coil (COILS); IPR001680 (SMART); IPR001680 (PFAM); IPR015943 (G3DSA:2.130.10.GENE3D); IPR017986 (SUPERFAMILY)
Aqu2.1.23395_001	chromatin assembly factor 1 subunit a	603	20	0	0.5795	4	C:GO:0043234; P:GO:0044763; P:GO:0006259; P:GO:0034645	-	Coil (COILS); PF11600 (PFAM); IPR022043 (PFAM); PTHR15272:SF0 (PANTHER); PTHR15272 (PANTHER)
Aqu2.1.23473_001	uncharacterized protein loc663644	2001	20	0	0.57	3	F:GO:0005089; P:GO:0035023; F:GO:0005515		Coil (COILS); PR01217 (PRINTS); IPR000219 (SMART); IPR001452 (SMART); G3DSA:2.30.30.40 (GENE3D); IPR001452 (PFAM); IPR000219 (G3DSA:1.20.900.GENE3D); IPR000219 (PFAM); PTHR12845 (PANTHER); IPR001452 (PROSITE_PROFILES); IPR000219 (PROSITE_PROFILES); SSF50729 (SUPERFAMILY); IPR001452 (SUPERFAMILY); IPR000219 (SUPERFAMILY)
Aqu2.1.23486_001	apolipoprotein l3-like	488	20	0	0.489	6	P:GO:0042157; F:GO:0008289; P:GO:0006869; C:GO:0005576; F:GO:0004197; P:GO:0006508	EC:3.4.22.0	IPR008405 (PFAM); G3DSA:3.40.50.1460 (GENE3D); TRANSMEMBRANE (PHOBIUS); CYTOPLASMIC_DOMAIN (PHOBIUS); TRANSMEMBRANE (PHOBIUS); CYTOPLASMIC_DOMAIN (PHOBIUS); NON_CYTOPLASMIC_DOMAIN (PHOBIUS); IPR001309 (PROSITE_PROFILES); SSF52129 (SUPERFAMILY); TMhelix (TMHMM); TMhelix (TMHMM); TMhelix (TMHMM)
Aqu2.1.23571_001	---NA---	44	0			0	-		no IPS match
Aqu2.1.23641_001	embryonic development factor	261	20	8.61475e-30	0.5055	1	C:GO:0005783		Coil (COILS); IPR019150 (PFAM); PTHR13050:SF5 (PANTHER); PTHR13050 (PANTHER); CYTOPLASMIC_DOMAIN (PHOBIUS); TRANSMEMBRANE (PHOBIUS); NON_CYTOPLASMIC_DOMAIN (PHOBIUS); TMhelix (TMHMM)
Aqu2.1.23730_001	---NA---	19	0			0	-		no IPS match
Aqu2.1.23854_001	membrane protein	1438	20	1.1604e-76	0.397	0	-		Coil (COILS); IPR006626 (SMART); TRANSMEMBRANE (PHOBIUS); TRANSMEMBRANE (PHOBIUS); CYTOPLASMIC_DOMAIN (PHOBIUS); NON_CYTOPLASMIC_DOMAIN (PHOBIUS); SIGNAL_PEPTIDE (PHOBIUS); SIGNAL_PEPTIDE_N_REGION (PHOBIUS); NON_CYTOPLASMIC_DOMAIN (PHOBIUS); NON_CYTOPLASMIC_DOMAIN (PHOBIUS); TRANSMEMBRANE (PHOBIUS); TRANSMEMBRANE (PHOBIUS); TRANSMEMBRANE (PHOBIUS); CYTOPLASMIC_DOMAIN (PHOBIUS); NON_CYTOPLASMIC_DO…
Aqu2.1.23856_001	electron transfer flavoprotein subunit beta	256	20	0	0.837	5	C:GO:0017133; F:GO:0009055; P:GO:0055114; P:GO:0006810; P:GO:0006118	-	IPR012255 (PIRSF); IPR014730 (SMART); IPR014729 (G3DSA:3.40.50.GENE3D); IPR014730 (PFAM); IPR012255 (PANTHER); IPR000049 (PROSITE_PATTERNS); SSF52402 (SUPERFAMILY)
Aqu2.1.23866_001	structure-specific endonuclease subunit slx4	645	20	2.07062e-13	0.5245	5	F:GO:0005515; C:GO:0033557; F:GO:0017108; P:GO:0006281; P:GO:0006260		IPR011333 (G3DSA:3.30.710.GENE3D); IPR013069 (PFAM); IPR018574 (PFAM); PTHR21541 (PANTHER); PTHR21541:SF0 (PANTHER); IPR000210 (PROSITE_PROFILES); IPR011333 (SUPERFAMILY)
Aqu2.1.23869_001	cgmp-dependent 3 -cyclic phosphodiesterase isoform x3	870	20	0	0.6565	30	P:GO:0019933; F:GO:0004118; F:GO:0042803; P:GO:0071321; P:GO:0019934; P:GO:0043116; F:GO:0030552; P:GO:0036006; F:GO:0046872; C:GO:0005829; P:GO:0006198; P:GO:0007596; P:GO:0033159; F:GO:0005262; F:GO:0008144; P:GO:0046069; P:GO:0071560; P:GO:0009605; C:GO:0005886; F:GO:0030553; C:GO:0048471; P:GO:0000122; C:GO:0097458; F:GO:0030911; P:GO:0035690; P:GO:0030224; P:GO:0070588; C:GO:0005634; P:GO:00…	-	IPR023088 (PRINTS); IPR003018 (SMART); IPR003607 (SMART); IPR002073 (PFAM); IPR002073 (G3DSA:1.10.1300.GENE3D); IPR003018 (PFAM); G3DSA:3.30.450.40 (GENE3D); PTHR11347:SF18 (PANTHER); PTHR11347 (PANTHER); IPR023174 (PROSITE_PATTERNS); SSF55781 (SUPERFAMILY); SSF109604 (SUPERFAMILY)
Aqu2.1.23917_001	condensin-2 complex subunit d3	1504	20	0	0.5345	2	P:GO:0007076; F:GO:0005488	-	Coil (COILS); Coil (COILS); IPR026003 (PFAM); IPR011989 (G3DSA:1.25.10.GENE3D); PF12717 (PFAM); IPR026971 (PANTHER); PTHR14222:SF0 (PANTHER); IPR016024 (SUPERFAMILY); IPR016024 (SUPERFAMILY)
Aqu2.1.23946_001	ephrin type-a receptor 4-a-like	586	20	0	0.7115	3	F:GO:0004713; P:GO:0018108; F:GO:0005524	EC:2.7.10.0	IPR001245 (PRINTS); IPR020635 (SMART); IPR001245 (PFAM); G3DSA:3.30.200.20 (GENE3D); G3DSA:1.10.510.10 (GENE3D); PTHR24418 (PANTHER); IPR008266 (PROSITE_PATTERNS); IPR017441 (PROSITE_PATTERNS); CYTOPLASMIC_DOMAIN (PHOBIUS); TRANSMEMBRANE (PHOBIUS); NON_CYTOPLASMIC_DOMAIN (PHOBIUS); IPR000719 (PROSITE_PROFILES); IPR011009 (SUPERFAMILY); TMhelix (TMHMM)
Aqu2.1.24275_001	---NA---	174	0			0	-		no IPS match
Aqu2.1.24277_001	---NA---	471	0			0	-		no IPS match
Aqu2.1.24301_001	tripartite motif-containing protein 3	644	20	0	0.496	3	F:GO:0005515; F:GO:0008270; C:GO:0005622		Coil (COILS); Coil (COILS); IPR001841 (SMART); IPR000315 (SMART); IPR003649 (SMART); IPR000315 (PFAM); IPR001258 (PFAM); PF15227 (PFAM); IPR000315 (G3DSA:4.10.45.GENE3D); IPR013083 (G3DSA:3.30.40.GENE3D); IPR011042 (G3DSA:2.120.10.GENE3D); PTHR24103 (PANTHER); PTHR24103:SF134 (PANTHER); IPR017907 (PROSITE_PATTERNS); IPR013017 (PROSITE_PROFILES); IPR013017 (PROSITE_PROFILES); IPR013017 (PROSITE_PR…
Aqu2.1.24487_001	hypoxia-inducible factor 1-alpha inhibitor	329	20	0	0.7435	23	F:GO:0048037; P:GO:0045746; P:GO:2001214; F:GO:0008270; F:GO:0071532; F:GO:0036140; F:GO:0031406; P:GO:0061428; C:GO:0005829; P:GO:0042264; F:GO:0005506; P:GO:0042265; F:GO:0051059; F:GO:0036139; F:GO:0019826; P:GO:0055114; P:GO:0045663; P:GO:0036138; C:GO:0048471; F:GO:0042803; C:GO:0005634; F:GO:0005112; C:GO:0005667	-	IPR003347 (SMART); G3DSA:2.60.120.650 (GENE3D); IPR027452 (G3DSA:1.10.287.GENE3D); PF13621 (PFAM); PTHR12461 (PANTHER); IPR003347 (PROSITE_PROFILES); SSF51197 (SUPERFAMILY)
Aqu2.1.24512_001	fumarylacetoacetase	418	20	0	0.8135	4	F:GO:0004334; P:GO:0006527; P:GO:0006570; P:GO:0042207	EC:3.7.1.2	IPR015377 (G3DSA:2.30.30.GENE3D); IPR002529 (PFAM); IPR011234 (G3DSA:3.90.850.GENE3D); IPR015377 (PFAM); IPR005959 (TIGRFAM); IPR005959 (PTHR11820:PANTHER); PTHR11820 (PANTHER); IPR015377 (SUPERFAMILY); IPR011234 (SUPERFAMILY)
Aqu2.1.24515_001	nad-dependent epimerase dehydratase family protein	376	20	0	0.756	3	P:GO:0044237; F:GO:0050662; F:GO:0003824	-	IPR016040 (G3DSA:3.40.50.GENE3D); IPR001509 (PFAM); PTHR10366 (PANTHER); PTHR10366:SF3 (PANTHER); SSF51735 (SUPERFAMILY)
Aqu2.1.24542_001	disks large homolog 5-like	1162	20	5.13077e-27	0.4575	1	F:GO:0005515		G3DSA:2.30.42.10 (GENE3D); G3DSA:2.30.30.40 (GENE3D); IPR001478 (PROSITE_PROFILES); IPR001478 (SUPERFAMILY); IPR001452 (SUPERFAMILY)
Aqu2.1.24543_001	PREDICTED: hypothetical protein LOC100635700 [Amphimedon queenslandica]	390	1	5.09956e-123	1	0	-		TRANSMEMBRANE (PHOBIUS); NON_CYTOPLASMIC_DOMAIN (PHOBIUS); TRANSMEMBRANE (PHOBIUS); NON_CYTOPLASMIC_DOMAIN (PHOBIUS); TRANSMEMBRANE (PHOBIUS); NON_CYTOPLASMIC_DOMAIN (PHOBIUS); TRANSMEMBRANE (PHOBIUS); TRANSMEMBRANE (PHOBIUS); TRANSMEMBRANE (PHOBIUS); CYTOPLASMIC_DOMAIN (PHOBIUS); CYTOPLASMIC_DOMAIN (PHOBIUS); TRANSMEMBRANE (PHOBIUS); NON_CYTOPLASMIC_DOMAIN (PHOBIUS); CYTOPLASMIC_DOMAIN (PHOBIUS)…
Aqu2.1.24588_001	---NA---	103	0			0	-		no IPS match
Aqu2.1.24632_001	rna-directed dna polymerase from mobile element jockey-like	178	20	4.49353e-19	0.5355	19	F:GO:0005525; F:GO:0003924; P:GO:0006184; F:GO:0000166; F:GO:0004674; P:GO:0006397; P:GO:0016310; F:GO:0004540; F:GO:0004672; P:GO:0006468; F:GO:0005524; F:GO:0016301; F:GO:0016772; F:GO:0003723; P:GO:0006278; F:GO:0003964; F:GO:0003676; C:GO:0016021; C:GO:0016020		CYTOPLASMIC_DOMAIN (PHOBIUS); NON_CYTOPLASMIC_DOMAIN (PHOBIUS); TRANSMEMBRANE (PHOBIUS); TRANSMEMBRANE (PHOBIUS); CYTOPLASMIC_DOMAIN (PHOBIUS); NON_CYTOPLASMIC_DOMAIN (PHOBIUS); TRANSMEMBRANE (PHOBIUS); TMhelix (TMHMM)
Aqu2.1.24676_001	---NA---	110	0			0	-		no IPS match
Aqu2.1.24907_001	protein	1088	7	1.60232e-36	0.392857	0	-		IPR006626 (SMART); CYTOPLASMIC_DOMAIN (PHOBIUS); NON_CYTOPLASMIC_DOMAIN (PHOBIUS); TRANSMEMBRANE (PHOBIUS); SIGNAL_PEPTIDE_N_REGION (PHOBIUS); NON_CYTOPLASMIC_DOMAIN (PHOBIUS); NON_CYTOPLASMIC_DOMAIN (PHOBIUS); TRANSMEMBRANE (PHOBIUS); SIGNAL_PEPTIDE_H_REGION (PHOBIUS); TRANSMEMBRANE (PHOBIUS); SIGNAL_PEPTIDE (PHOBIUS); SIGNAL_PEPTIDE_C_REGION (PHOBIUS); CYTOPLASMIC_DOMAIN (PHOBIUS); TRANSMEMBRAN…
Aqu2.1.24910_001	kelch domain-containing protein 4-like	1227	20	0	0.672	5	P:GO:0018193; F:GO:0004672; P:GO:0006468; F:GO:0005524; F:GO:0005515	-	G3DSA:3.40.50.300 (GENE3D); PF13415 (PFAM); IPR015915 (G3DSA:2.120.10.GENE3D); PTHR23244 (PANTHER); SSF117281 (SUPERFAMILY)
Aqu2.1.24972_001	atp-binding cassette sub-family a member 3-like	2024	20	0	0.6095	3	P:GO:0006200; F:GO:0005524; F:GO:0016887	EC:3.6.1.3	IPR003593 (SMART); PF12698 (PFAM); G3DSA:3.40.50.300 (GENE3D); IPR003439 (PFAM); PTHR19229:SF36 (PANTHER); IPR026082 (PANTHER); IPR017871 (PROSITE_PATTERNS); TRANSMEMBRANE (PHOBIUS); TRANSMEMBRANE (PHOBIUS); TRANSMEMBRANE (PHOBIUS); TRANSMEMBRANE (PHOBIUS); TRANSMEMBRANE (PHOBIUS); CYTOPLASMIC_DOMAIN (PHOBIUS); TRANSMEMBRANE (PHOBIUS); NON_CYTOPLASMIC_DOMAIN (PHOBIUS); TRANSMEMBRANE (PHOBIUS); CY…
Aqu2.1.25121_001	polyubiquitin-c- partial	144	3	4.40621e-20	0.586667	0	-		no IPS match
Aqu2.1.25126_001	kinesin-like protein kif13a isoform x2	1149	20	0	0.4755	7	F:GO:0003777; F:GO:0005488; P:GO:0044765; P:GO:0007018; P:GO:0046907; C:GO:0005871; C:GO:0005874	-	IPR000938 (SMART); IPR000938 (G3DSA:2.30.30.GENE3D); IPR000938 (PFAM); IPR022164 (PFAM); PTHR24115:SF131 (PANTHER); IPR027640 (PANTHER); IPR000938 (PROSITE_PATTERNS); IPR000938 (PROSITE_PROFILES); IPR000938 (SUPERFAMILY)
Aqu2.1.25310_001	junctophilin-2	652	20	0	0.5275	0	-		Coil (COILS); IPR003409 (SMART); IPR003409 (PFAM); G3DSA:2.20.110.10 (GENE3D); PTHR23085:SF8 (PANTHER); PTHR23085 (PANTHER); TRANSMEMBRANE (PHOBIUS); NON_CYTOPLASMIC_DOMAIN (PHOBIUS); CYTOPLASMIC_DOMAIN (PHOBIUS); SSF82185 (SUPERFAMILY); SSF82185 (SUPERFAMILY); SSF82185 (SUPERFAMILY); TMhelix (TMHMM)
Aqu2.1.25340_001	extracellular protease	350	20	3.74399e-68	0.5455	1	F:GO:0008237		PF14521 (PFAM); IPR024079 (G3DSA:3.40.390.GENE3D); SIGNAL_PEPTIDE_N_REGION (PHOBIUS); NON_CYTOPLASMIC_DOMAIN (PHOBIUS); SIGNAL_PEPTIDE (PHOBIUS); SIGNAL_PEPTIDE_C_REGION (PHOBIUS); SIGNAL_PEPTIDE_H_REGION (PHOBIUS); SignalP-noTM (SIGNALP_GRAM_NEGATIVE); SignalP-TM (SIGNALP_GRAM_POSITIVE); SignalP-noTM (SIGNALP_EUK); SSF55486 (SUPERFAMILY)
Aqu2.1.25399_001	lipoprotein	551	20	1.20618e-12	0.5735	3	F:GO:0008061; P:GO:0006030; C:GO:0005576		IPR011936 (TIGRFAM); IPR011936 (PFAM); TRANSMEMBRANE (PHOBIUS); CYTOPLASMIC_DOMAIN (PHOBIUS); CYTOPLASMIC_DOMAIN (PHOBIUS); NON_CYTOPLASMIC_DOMAIN (PHOBIUS); TRANSMEMBRANE (PHOBIUS); TMhelix (TMHMM); TMhelix (TMHMM)
Aqu2.1.25436_001	dynein heavy chain axonemal- partial	91	14	2.45075e-20	0.607143	5	P:GO:0009199; P:GO:0009119; F:GO:0016787; P:GO:0009165; P:GO:0009259	-	no IPS match
Aqu2.1.25568_001	proprotein convertase subtilisin kexin type 5 isoform x1	1185	20	0	0.5235	3	F:GO:0004252; P:GO:0048882; P:GO:0006508	EC:3.4.21.0	IPR015500 (PRINTS); IPR006212 (SMART); IPR002884 (PFAM); G3DSA:3.30.70.850 (GENE3D); IPR000209 (G3DSA:3.40.50.GENE3D); G3DSA:2.10.220.10 (GENE3D); PF14843 (PFAM); IPR008979 (G3DSA:2.60.120.GENE3D); G3DSA:2.10.220.10 (GENE3D); IPR000209 (PFAM); G3DSA:2.10.220.10 (GENE3D); IPR015500 (PANTHER); IPR023828 (PROSITE_PATTERNS); IPR023827 (PROSITE_PATTERNS); IPR022398 (PROSITE_PATTERNS); SIGNAL_PEPTIDE_H…
Aqu2.1.25572_001	gtp-binding protein rit1	229	20	4.22638e-170	0.796	5	P:GO:0007265; P:GO:0006184; F:GO:0003924; F:GO:0005525; C:GO:0005886	-	IPR001806 (PRINTS); IPR020849 (SMART); IPR001806 (PFAM); G3DSA:3.40.50.300 (GENE3D); IPR005225 (TIGRFAM); IPR020849 (PANTHER); IPR020849 (PROSITE_PROFILES); IPR027417 (SUPERFAMILY)
Aqu2.1.25601_001	multidrug resistance protein 1- partial	2166	20	0	0.756	16	P:GO:0007595; C:GO:0000139; F:GO:0005515; P:GO:0071356; P:GO:0046685; C:GO:0016021; P:GO:0048545; P:GO:0006855; P:GO:0014045; P:GO:0001666; F:GO:0015238; F:GO:0042626; P:GO:0010212; C:GO:0046581; F:GO:0005524; C:GO:0016324	-	IPR003593 (SMART); IPR003439 (PFAM); G3DSA:1.20.1560.10 (GENE3D); IPR001140 (PFAM); G3DSA:3.40.50.300 (GENE3D); PTHR24221:SF24 (PANTHER); PTHR24221 (PANTHER); IPR017871 (PROSITE_PATTERNS); NON_CYTOPLASMIC_DOMAIN (PHOBIUS); TRANSMEMBRANE (PHOBIUS); TRANSMEMBRANE (PHOBIUS); NON_CYTOPLASMIC_DOMAIN (PHOBIUS); CYTOPLASMIC_DOMAIN (PHOBIUS); TRANSMEMBRANE (PHOBIUS); CYTOPLASMIC_DOMAIN (PHOBIUS); NON_CYT…
Aqu2.1.25749_001	deleted in malignant brain tumors 1	439	20	1.37467e-41	0.5145	2	C:GO:0016020; F:GO:0005044		IPR001190 (PRINTS); IPR017448 (SMART); G3DSA:3.10.250.10 (GENE3D); IPR001190 (PFAM); PTHR19331 (PANTHER); PTHR19331:SF16 (PANTHER); IPR001190 (PROSITE_PATTERNS); IPR001190 (PROSITE_PATTERNS); CYTOPLASMIC_DOMAIN (PHOBIUS); TRANSMEMBRANE (PHOBIUS); NON_CYTOPLASMIC_DOMAIN (PHOBIUS); IPR001190 (PROSITE_PROFILES); IPR001190 (PROSITE_PROFILES); IPR017448 (SUPERFAMILY); IPR017448 (SUPERFAMILY); TMhelix …
Aqu2.1.25751_001	cytochrome c oxidase assembly protein mitochondrial-like	253	20	0	0.7515	2	F:GO:0005507; C:GO:0016020	-	IPR007533 (PIRSF); IPR023471 (G3DSA:2.60.370.GENE3D); IPR007533 (PFAM); IPR007533 (PANTHER); PTHR21320:SF0 (PANTHER); NON_CYTOPLASMIC_DOMAIN (PHOBIUS); SIGNAL_PEPTIDE_C_REGION (PHOBIUS); CYTOPLASMIC_DOMAIN (PHOBIUS); SIGNAL_PEPTIDE_N_REGION (PHOBIUS); SIGNAL_PEPTIDE (PHOBIUS); TRANSMEMBRANE (PHOBIUS); SIGNAL_PEPTIDE_H_REGION (PHOBIUS); IPR007533 (HAMAP); IPR023471 (SUPERFAMILY)
Aqu2.1.25753_001	PREDICTED: hypothetical protein LOC100640080 [Amphimedon queenslandica]	208	1	2.79754e-130	1	0	-		Coil (COILS)
Aqu2.1.25789_001	protein yng1	289	20	1.26625e-29	0.4915	2	F:GO:0046872; F:GO:0008270		no IPS match
Aqu2.1.25860_001	---NA---	98	0			0	-		no IPS match
Aqu2.1.25862_001	heat shock cognate 71 kda partial	269	20	1.37407e-180	0.925	29	C:GO:0009986; P:GO:0045892; C:GO:0070062; P:GO:0006892; P:GO:0019048; C:GO:0005681; F:GO:0051082; C:GO:0043005; C:GO:0061202; P:GO:0007411; F:GO:0005102; C:GO:0005829; C:GO:0000974; P:GO:0051726; P:GO:0051085; P:GO:0006200; P:GO:0008380; P:GO:0006986; C:GO:0005886; F:GO:0042623; F:GO:0005524; C:GO:0042470; F:GO:0043531; P:GO:0006397; C:GO:0005730; C:GO:0043025; P:GO:0007269; C:GO:0008021; P:GO:00…	-	Coil (COILS); G3DSA:2.60.34.10 (GENE3D); IPR013126 (PFAM); G3DSA:1.20.1270.10 (GENE3D); PTHR19375 (PANTHER); PTHR19375:SF130 (PANTHER); IPR018181 (PROSITE_PATTERNS); SSF100934 (SUPERFAMILY); SSF100920 (SUPERFAMILY)
Aqu2.1.25863_001	grb2-associated-binding protein 1 isoform x2	661	20	1.84951e-30	0.576	1	P:GO:0007165	-	IPR001849 (SMART); IPR001849 (PFAM); IPR011993 (G3DSA:2.30.29.GENE3D); PTHR12156 (PANTHER); IPR001849 (PROSITE_PROFILES); SSF50729 (SUPERFAMILY)
Aqu2.1.25874_001	p protein	840	20	0	0.7125	4	C:GO:0016021; P:GO:0006814; P:GO:0055085; F:GO:0005215	-	Coil (COILS); IPR004680 (PFAM); IPR001898 (PFAM); PTHR10283 (PANTHER); PTHR10283:SF33 (PANTHER); NON_CYTOPLASMIC_DOMAIN (PHOBIUS); CYTOPLASMIC_DOMAIN (PHOBIUS); TRANSMEMBRANE (PHOBIUS); TRANSMEMBRANE (PHOBIUS); CYTOPLASMIC_DOMAIN (PHOBIUS); TRANSMEMBRANE (PHOBIUS); CYTOPLASMIC_DOMAIN (PHOBIUS); TRANSMEMBRANE (PHOBIUS); NON_CYTOPLASMIC_DOMAIN (PHOBIUS); TRANSMEMBRANE (PHOBIUS); CYTOPLASMIC_DOMAIN …
Aqu2.1.25924_001	TP63	594	20	6.88844e-28	0.504	6	P:GO:0006355; C:GO:0005634; P:GO:0006915; F:GO:0003700; F:GO:0005515; F:GO:0044212		IPR002117 (PRINTS); IPR001660 (SMART); IPR011510 (PFAM); IPR012346 (G3DSA:2.60.40.GENE3D); IPR011615 (PFAM); IPR013761 (G3DSA:1.10.150.GENE3D); PTHR11447:SF16 (PANTHER); IPR002117 (PANTHER); IPR001660 (PROSITE_PROFILES); IPR013761 (SUPERFAMILY); IPR008967 (SUPERFAMILY)
Aqu2.1.25928_001	ankyrin repeat protein	384	20	3.02404e-31	0.497	1	F:GO:0005515		IPR002110 (PRINTS); IPR002110 (SMART); IPR020683 (PFAM); PF13857 (PFAM); IPR020683 (G3DSA:1.25.40.GENE3D); IPR020683 (G3DSA:1.25.40.GENE3D); IPR020683 (G3DSA:1.25.40.GENE3D); PTHR24198 (PANTHER); IPR002110 (PROSITE_PROFILES); IPR002110 (PROSITE_PROFILES); IPR002110 (PROSITE_PROFILES); IPR020683 (PROSITE_PROFILES); IPR002110 (PROSITE_PROFILES); IPR020683 (SUPERFAMILY); IPR020683 (SUPERFAMILY)
Aqu2.1.26040_001	poly adp-ribose polymerase member 14-like protein	816	20	3.34013e-32	0.558	1	F:GO:0003950		IPR012317 (PFAM); IPR012317 (G3DSA:3.90.228.GENE3D); PTHR14453 (PANTHER); IPR004170 (PROSITE_PROFILES); IPR012317 (PROSITE_PROFILES); SSF56399 (SUPERFAMILY); SSF117839 (SUPERFAMILY)
Aqu2.1.26112_001	protein phosphatase 1 regulatory subunit 32-like	406	20	1.64435e-38	0.4045	0	-		no IPS match
Aqu2.1.26153_001	uncharacterized protein loc100887903	688	1	2.0724e-14	0.47	0	-		TRANSMEMBRANE (PHOBIUS); CYTOPLASMIC_DOMAIN (PHOBIUS); NON_CYTOPLASMIC_DOMAIN (PHOBIUS); TMhelix (TMHMM)
Aqu2.1.26222_001	deleted in malignant brain tumors 1	2289	20	1.13393e-41	0.384	4	C:GO:0016020; F:GO:0005044; F:GO:0005515; F:GO:0005509		IPR003598 (SMART); IPR017448 (SMART); IPR000742 (SMART); IPR001881 (SMART); IPR003599 (SMART); IPR001190 (PFAM); IPR013783 (G3DSA:2.60.40.GENE3D); IPR013106 (PFAM); G3DSA:3.10.250.10 (GENE3D); G3DSA:2.10.25.10 (GENE3D); IPR013783 (G3DSA:2.60.40.GENE3D); PF13895 (PFAM); PTHR22576:SF1 (PANTHER); PTHR22576 (PANTHER); IPR013032 (PROSITE_PATTERNS); IPR000152 (PROSITE_PATTERNS); SIGNAL_PEPTIDE_N_REGION…
Aqu2.1.26307_001	abc transporter g family member 20-like	726	20	0	0.6265	5	P:GO:0006810; F:GO:0042626; P:GO:0006200; F:GO:0005524; C:GO:0016020	-	IPR003593 (SMART); G3DSA:3.40.50.300 (GENE3D); PF12698 (PFAM); IPR003439 (PFAM); PTHR24220 (PANTHER); PTHR24220:SF194 (PANTHER); IPR017871 (PROSITE_PATTERNS); NON_CYTOPLASMIC_DOMAIN (PHOBIUS); TRANSMEMBRANE (PHOBIUS); TRANSMEMBRANE (PHOBIUS); CYTOPLASMIC_DOMAIN (PHOBIUS); TRANSMEMBRANE (PHOBIUS); NON_CYTOPLASMIC_DOMAIN (PHOBIUS); CYTOPLASMIC_DOMAIN (PHOBIUS); CYTOPLASMIC_DOMAIN (PHOBIUS); CYTOPLA…
Aqu2.1.26604_001	deleted in malignant brain tumors 1	4421	20	0	0.5845	6	C:GO:0016020; F:GO:0005044; F:GO:0005515; F:GO:0005509; F:GO:0005201; C:GO:0005578		IPR001190 (PRINTS); IPR017448 (SMART); IPR000742 (SMART); IPR001881 (SMART); PF14670 (PFAM); IPR001881 (PFAM); IPR013783 (G3DSA:2.60.40.GENE3D); G3DSA:2.10.25.10 (GENE3D); G3DSA:2.10.25.10 (GENE3D); G3DSA:2.10.25.10 (GENE3D); G3DSA:3.10.250.10 (GENE3D); IPR001190 (PFAM); G3DSA:2.10.25.10 (GENE3D); G3DSA:2.10.25.10 (GENE3D); G3DSA:2.10.25.10 (GENE3D); IPR026823 (PFAM); G3DSA:2.10.25.10 (GENE3D); G…
Aqu2.1.26614_001	uncharacterized protein tcm_026511	464	20	8.17241e-37	0.449	2	F:GO:0003676; F:GO:0008270		Coil (COILS); IPR001878 (SMART); PF14223 (PFAM); IPR001878 (G3DSA:4.10.60.GENE3D); IPR025724 (PFAM); IPR001878 (PFAM); PTHR11439:SF127 (PANTHER); PTHR11439 (PANTHER); IPR001878 (PROSITE_PROFILES); IPR001878 (SUPERFAMILY)
Aqu2.1.26649_001	meiotically up-regulated gene 158	1314	20	0	0.6655	3	F:GO:0008168; F:GO:0016740; P:GO:0032259		IPR027577 (TIGRFAM); IPR024775 (PFAM); G3DSA:3.40.50.150 (GENE3D); IPR005532 (PFAM); IPR005532 (G3DSA:3.90.1580.GENE3D); PTHR23150:SF5 (PANTHER); PTHR23150 (PANTHER); SSF53335 (SUPERFAMILY); IPR016187 (SUPERFAMILY)
Aqu2.1.26854_001	clathrin heavy chain linker domain-containing protein 1 isoform 1	643	20	7.72343e-68	0.496	1	F:GO:0005488		Coil (COILS); Coil (COILS); Coil (COILS); PF13838 (PFAM); IPR012331 (G3DSA:1.25.40.GENE3D); PTHR10292:SF2 (PANTHER); PTHR10292 (PANTHER); CYTOPLASMIC_DOMAIN (PHOBIUS); NON_CYTOPLASMIC_DOMAIN (PHOBIUS); TRANSMEMBRANE (PHOBIUS); IPR016024 (SUPERFAMILY)
Aqu2.1.26958_001	PREDICTED: hypothetical protein LOC100641558 [Amphimedon queenslandica]	786	1	0	1	1	F:GO:0005515		CYTOPLASMIC_DOMAIN (PHOBIUS); SIGNAL_PEPTIDE_N_REGION (PHOBIUS); NON_CYTOPLASMIC_DOMAIN (PHOBIUS); SIGNAL_PEPTIDE_C_REGION (PHOBIUS); SIGNAL_PEPTIDE (PHOBIUS); SIGNAL_PEPTIDE_H_REGION (PHOBIUS); TRANSMEMBRANE (PHOBIUS); IPR007110 (PROSITE_PROFILES); SignalP-noTM (SIGNALP_EUK); TMhelix (TMHMM)
Aqu2.1.26985_001	sodium hydrogen exchanger 1	721	20	0	0.5945	6	F:GO:0015385; P:GO:0055085; P:GO:0006885; C:GO:0016021; P:GO:0006814; P:GO:0015992	-	IPR004709 (PRINTS); IPR004709 (TIGRFAM); IPR006153 (PFAM); PTHR10110:SF20 (PANTHER); IPR018422 (PANTHER); TRANSMEMBRANE (PHOBIUS); TRANSMEMBRANE (PHOBIUS); TRANSMEMBRANE (PHOBIUS); CYTOPLASMIC_DOMAIN (PHOBIUS); NON_CYTOPLASMIC_DOMAIN (PHOBIUS); TRANSMEMBRANE (PHOBIUS); TRANSMEMBRANE (PHOBIUS); TRANSMEMBRANE (PHOBIUS); NON_CYTOPLASMIC_DOMAIN (PHOBIUS); CYTOPLASMIC_DOMAIN (PHOBIUS); NON_CYTOPLASMIC…
Aqu2.1.27007_001	peptidyl-prolyl cis-trans isomerase-like 3	162	20	1.33983e-115	0.893	3	P:GO:0006457; P:GO:0000413; F:GO:0003755	EC:5.2.1.8	IPR002130 (PRINTS); IPR024936 (PIRSF); IPR002130 (PFAM); G3DSA:2.40.100.10 (GENE3D); PTHR11071 (PANTHER); IPR020892 (PROSITE_PATTERNS); IPR002130 (PROSITE_PROFILES); IPR002130 (SUPERFAMILY)
Aqu2.1.27009_001	gtpase mitochondrial	309	20	0	0.5905	3	F:GO:0003723; C:GO:0005622; F:GO:0005525	-	IPR004044 (PFAM); IPR006073 (PFAM); IPR005225 (TIGRFAM); IPR015946 (G3DSA:3.30.300.GENE3D); G3DSA:3.40.50.300 (GENE3D); IPR005662 (TIGRFAM); PTHR11649:SF3 (PANTHER); PTHR11649 (PANTHER); IPR005662 (HAMAP); IPR027417 (SUPERFAMILY); IPR009019 (SUPERFAMILY)
Aqu2.1.27080_001	rho gtpase-activating protein 21	1339	20	0	0.5365	4	F:GO:0005543; F:GO:0005515; P:GO:0007165; C:GO:0005622	-	Coil (COILS); IPR001605 (PRINTS); IPR001849 (SMART); IPR000198 (SMART); IPR001478 (SMART); G3DSA:2.30.42.10 (GENE3D); IPR000198 (PFAM); IPR001478 (PFAM); IPR001849 (PFAM); IPR000198 (G3DSA:1.10.555.GENE3D); IPR011993 (G3DSA:2.30.29.GENE3D); PTHR23175:SF10 (PANTHER); PTHR23175 (PANTHER); IPR000198 (PROSITE_PROFILES); IPR001849 (PROSITE_PROFILES); IPR001478 (PROSITE_PROFILES); IPR008936 (SUPERFAMIL…
Aqu2.1.27108_001	---NA---	566	0			0	-		no IPS match
Aqu2.1.27110_001	tripartite motif-containing protein 71-like	746	20	1.86394e-175	0.651	3	F:GO:0008270; F:GO:0005515; C:GO:0005622		Coil (COILS); Coil (COILS); IPR001841 (SMART); IPR000315 (SMART); IPR003649 (SMART); IPR000315 (PFAM); IPR011042 (G3DSA:2.120.10.GENE3D); IPR000315 (G3DSA:4.10.45.GENE3D); IPR001841 (PFAM); IPR013083 (G3DSA:3.30.40.GENE3D); IPR001258 (PFAM); PTHR24103:SF134 (PANTHER); PTHR24103 (PANTHER); IPR017907 (PROSITE_PATTERNS); IPR013017 (PROSITE_PROFILES); IPR000315 (PROSITE_PROFILES); IPR013017 (PROSITE_…
Aqu2.1.27176_001	neurofibromin isoform x2	2749	20	0	0.5725	22	P:GO:0045685; P:GO:0050890; P:GO:0050768; P:GO:0061351; P:GO:0043409; P:GO:0045765; P:GO:0021782; P:GO:0030336; P:GO:0016043; P:GO:0030900; P:GO:0019226; C:GO:0030424; P:GO:0043535; P:GO:0032320; P:GO:0001937; F:GO:0005099; F:GO:0005515; P:GO:0048522; P:GO:0065008; C:GO:0030425; P:GO:0007422; C:GO:0005622	-	IPR001936 (SMART); IPR001936 (PFAM); IPR001936 (G3DSA:1.10.506.GENE3D); IPR001251 (PFAM); G3DSA:1.10.494.10 (GENE3D); PTHR10194 (PANTHER); IPR028553 (PTHR10194:PANTHER); IPR023152 (PROSITE_PATTERNS); IPR001936 (PROSITE_PROFILES); IPR001251 (PROSITE_PROFILES); IPR008936 (SUPERFAMILY)
Aqu2.1.27189_001	neuroglobin	155	20	1.07105e-105	0.5515	5	P:GO:0015671; F:GO:0005344; F:GO:0005506; F:GO:0020037; F:GO:0019825	-	IPR001032 (PRINTS); IPR000971 (PFAM); IPR012292 (G3DSA:1.10.490.GENE3D); PTHR22924 (PANTHER); IPR000971 (PROSITE_PROFILES); IPR009050 (SUPERFAMILY)
Aqu2.1.27252_001	probable cation-transporting atpase 13a3	1200	20	0	0.5925	5	F:GO:0019829; P:GO:0006812; C:GO:0016021; F:GO:0000166; F:GO:0046872		IPR001757 (PRINTS); IPR008250 (G3DSA:2.70.150.GENE3D); IPR023299 (G3DSA:3.40.1110.GENE3D); PF12710 (PFAM); IPR008250 (PFAM); IPR004014 (PFAM); IPR023214 (G3DSA:3.40.50.GENE3D); IPR006544 (TIGRFAM); IPR001757 (TIGRFAM); IPR006544 (PFAM); PTHR24093:SF84 (PANTHER); PTHR24093 (PANTHER); IPR018303 (PROSITE_PATTERNS); NON_CYTOPLASMIC_DOMAIN (PHOBIUS); CYTOPLASMIC_DOMAIN (PHOBIUS); TRANSMEMBRANE (PHOBIU…
Aqu2.1.27279_001	GLI2	1021	20	0	0.5715	14	P:GO:0007224; P:GO:0048468; P:GO:0021510; P:GO:0043009; F:GO:0046872; P:GO:0048513; P:GO:0060429; C:GO:0043231; P:GO:0030182; F:GO:0003676; P:GO:0009953; P:GO:0048522; P:GO:0048598; P:GO:0006355	-	IPR015880 (SMART); IPR013087 (G3DSA:3.30.160.GENE3D); PF13465 (PFAM); PTHR19818:SF2 (PANTHER); PTHR19818 (PANTHER); IPR007087 (PROSITE_PATTERNS); IPR007087 (PROSITE_PROFILES); SSF57667 (SUPERFAMILY)
Aqu2.1.27334_001	rna-binding protein 15b	905	20	0	0.482	4	P:GO:0016070; F:GO:0003676; F:GO:0000166; P:GO:0010467	-	IPR000504 (SMART); PF14259 (PFAM); IPR012677 (G3DSA:3.30.70.GENE3D); IPR012921 (PFAM); IPR012677 (G3DSA:3.30.70.GENE3D); IPR000504 (PFAM); IPR012677 (G3DSA:3.30.70.GENE3D); IPR016194 (G3DSA:2.40.290.GENE3D); PTHR23189:SF3 (PANTHER); PTHR23189 (PANTHER); IPR000504 (PROSITE_PROFILES); IPR000504 (PROSITE_PROFILES); IPR010912 (PROSITE_PROFILES); IPR000504 (PROSITE_PROFILES); IPR016194 (SUPERFAMILY); …
Aqu2.1.27340_001	---NA---	58	0			0	-		no IPS match
Aqu2.1.27353_001	SOX14	424	20	0	0.75	9	F:GO:0000981; P:GO:0045892; F:GO:0046982; P:GO:0009649; P:GO:0007601; C:GO:0044798; F:GO:0003677; P:GO:0021854; P:GO:2001222	-	IPR009071 (SMART); IPR009071 (PFAM); IPR009071 (G3DSA:1.10.30.GENE3D); PTHR10270 (PANTHER); IPR009071 (PROSITE_PROFILES); IPR009071 (SUPERFAMILY)
Aqu2.1.27357_001	von willebrand factor type egf and pentraxin domain-containing protein 1-like	2411	20	0	0.481	2	F:GO:0016491; P:GO:0008152		IPR000436 (SMART); G3DSA:2.10.70.10 (GENE3D); G3DSA:2.10.70.10 (GENE3D); IPR002227 (PFAM); IPR000436 (PFAM); IPR008922 (G3DSA:1.10.1280.GENE3D); G3DSA:2.10.70.10 (GENE3D); PTHR19325 (PANTHER); SIGNAL_PEPTIDE_H_REGION (PHOBIUS); SIGNAL_PEPTIDE_N_REGION (PHOBIUS); NON_CYTOPLASMIC_DOMAIN (PHOBIUS); SIGNAL_PEPTIDE_C_REGION (PHOBIUS); SIGNAL_PEPTIDE (PHOBIUS); IPR000436 (PROSITE_PROFILES); IPR000436 (…
Aqu2.1.27372_001	phenylalanine--trna ligase alpha subunit-like	63	20	4.89815e-30	0.9325	8	P:GO:0006432; F:GO:0005524; F:GO:0004826; F:GO:0000049; P:GO:0000162; P:GO:0006571; P:GO:0009094; C:GO:0009328	EC:6.1.1.20	G3DSA:3.30.930.10 (GENE3D); IPR002319 (PFAM); PTHR11538 (PANTHER); PTHR11538:SF15 (PANTHER); SSF55681 (SUPERFAMILY)
Aqu2.1.27410_001	poly	685	20	0	0.5725	3	F:GO:0008270; P:GO:0006471; F:GO:0003950		IPR018123 (SMART); IPR008893 (SMART); IPR004102 (PFAM); IPR008893 (G3DSA:2.20.140.GENE3D); IPR004102 (G3DSA:1.20.142.GENE3D); IPR008893 (PFAM); IPR012317 (PFAM); IPR004170 (PFAM); IPR012317 (G3DSA:3.90.228.GENE3D); PTHR15447 (PANTHER); IPR012317 (PROSITE_PROFILES); IPR004102 (PROSITE_PROFILES); IPR004170 (PROSITE_PROFILES); IPR004170 (PROSITE_PROFILES); SSF117839 (SUPERFAMILY); IPR004102 (SUPERFA…
Aqu2.1.27474_001	mitochondrial import inner membrane translocase subunit tim10	89	20	1.60477e-58	0.8845	11	P:GO:0050829; P:GO:0072321; F:GO:0015450; C:GO:0005744; F:GO:0046872; F:GO:0051087; P:GO:0045039; C:GO:0042719; P:GO:0045824; F:GO:0042803; C:GO:0009941	-	IPR004217 (G3DSA:1.10.287.GENE3D); IPR004217 (PFAM); IPR027100 (PTHR11038:PANTHER); IPR027247 (PANTHER); IPR004217 (SUPERFAMILY)
Aqu2.1.27542_001	---NA---	164	0			0	-		SIGNAL_PEPTIDE_C_REGION (PHOBIUS); SIGNAL_PEPTIDE_N_REGION (PHOBIUS); NON_CYTOPLASMIC_DOMAIN (PHOBIUS); SIGNAL_PEPTIDE (PHOBIUS); SIGNAL_PEPTIDE_H_REGION (PHOBIUS); PS51257 (PROSITE_PROFILES); TMhelix (TMHMM); TMhelix (TMHMM)
Aqu2.1.27637_001	tetratricopeptide repeat protein 7b-like	504	20	4.69765e-63	0.584	5	P:GO:0009199; P:GO:0009119; F:GO:0016787; P:GO:0009165; P:GO:0009259	-	TRANSMEMBRANE (PHOBIUS); CYTOPLASMIC_DOMAIN (PHOBIUS); NON_CYTOPLASMIC_DOMAIN (PHOBIUS); TMhelix (TMHMM)
Aqu2.1.27885_001	nuclear pore complex protein nup54 isoform 2	161	20	2.25654e-38	0.6725	10	P:GO:0055085; P:GO:0005975; P:GO:0019221; P:GO:0016032; C:GO:0005654; P:GO:0044281; P:GO:0010827; C:GO:0005737; P:GO:0007077; C:GO:0005643	-	IPR025712 (PFAM); PTHR13000:SF0 (PANTHER); IPR024864 (PANTHER)
Aqu2.1.27942_001	uncharacterized protein partial	202	20	2.40467e-70	0.7485	8	F:GO:0008270; F:GO:0003676; P:GO:0006355; F:GO:0003700; P:GO:0015074; C:GO:0005634; C:GO:0005667; P:GO:0045449	-	G3DSA:3.30.420.10 (GENE3D); IPR001584 (PFAM); PTHR24559 (PANTHER); PTHR24559:SF97 (PANTHER); IPR001584 (PROSITE_PROFILES); IPR012337 (SUPERFAMILY)
Aqu2.1.28098_001	50s ribosomal protein l16	135	20	3.01216e-72	0.6435	4	F:GO:0003735; P:GO:0006412; F:GO:0019843; C:GO:0005840		IPR000114 (PRINTS); IPR000114 (TIGRFAM); IPR016180 (G3DSA:3.90.1170.GENE3D); IPR016180 (PFAM); IPR000114 (PANTHER); IPR020798 (PROSITE_PATTERNS); IPR016180 (SUPERFAMILY)
Aqu2.1.28273_001	bcl-2-like protein 1-like	234	20	4.05483e-173	0.505	14	C:GO:0044446; P:GO:0097190; P:GO:0016043; P:GO:0010033; C:GO:0005739; F:GO:0005515; P:GO:0097285; P:GO:0044702; P:GO:0065008; P:GO:0043066; P:GO:0044767; P:GO:0032501; P:GO:0048856; C:GO:0016020	-	IPR026298 (PRINTS); SM00337 (SMART); IPR026298 (PFAM); G3DSA:1.10.437.10 (GENE3D); IPR026298 (PANTHER); TRANSMEMBRANE (PHOBIUS); CYTOPLASMIC_DOMAIN (PHOBIUS); CYTOPLASMIC_DOMAIN (PHOBIUS); TRANSMEMBRANE (PHOBIUS); NON_CYTOPLASMIC_DOMAIN (PHOBIUS); IPR002475 (PROSITE_PROFILES); SSF56854 (SUPERFAMILY); TMhelix (TMHMM); TMhelix (TMHMM)
Aqu2.1.28282_001	cell division cycle protein 16 homolog	569	20	0	0.571	8	P:GO:0070979; F:GO:0005515; C:GO:0005680; C:GO:0005737; P:GO:0007067; C:GO:0005813; P:GO:0051439; C:GO:0005876	-	IPR019734 (SMART); IPR011990 (G3DSA:1.25.40.GENE3D); IPR019734 (PFAM); PF13414 (PFAM); IPR013105 (PFAM); PF12895 (PFAM); PTHR12558 (PANTHER); PTHR12558:SF9 (PANTHER); IPR019734 (PROSITE_PROFILES); IPR019734 (PROSITE_PROFILES); IPR013026 (PROSITE_PROFILES); IPR019734 (PROSITE_PROFILES); IPR019734 (PROSITE_PROFILES); IPR019734 (PROSITE_PROFILES); IPR019734 (PROSITE_PROFILES); IPR013026 (PROSITE_PRO…
Aqu2.1.28315_001	---NA---	31	0			0	-		no IPS match
Aqu2.1.28466_001	---NA---	53	0			0	-		TRANSMEMBRANE (PHOBIUS); NON_CYTOPLASMIC_DOMAIN (PHOBIUS); TRANSMEMBRANE (PHOBIUS); CYTOPLASMIC_DOMAIN (PHOBIUS); NON_CYTOPLASMIC_DOMAIN (PHOBIUS); TMhelix (TMHMM); TMhelix (TMHMM)
Aqu2.1.28569_001	---NA---	125	0			0	-		Coil (COILS)
Aqu2.1.28726_001	dual specificity protein phosphatase cdc14a isoform x3	485	20	0	0.7845	12	C:GO:0005737; F:GO:0004725; C:GO:0005730; F:GO:0008138; P:GO:0008283; F:GO:0005515; P:GO:0007049; C:GO:0005819; C:GO:0005813; P:GO:0035335; P:GO:0051301; P:GO:0006570	EC:3.1.3.48	Coil (COILS); G3DSA:3.90.190.10 (GENE3D); PF14671 (PFAM); IPR026068 (PTHR23339:PANTHER); PTHR23339 (PANTHER); SSF52799 (SUPERFAMILY)
Aqu2.1.28799_001	---NA---	40	0			0	-		no IPS match
Aqu2.1.28818_001	dihydrodipicolinate synthetase	336	20	1.7681e-76	0.5935	2	P:GO:0008152; F:GO:0016829		IPR013785 (G3DSA:3.20.20.GENE3D); IPR002220 (PFAM); PTHR12128:SF10 (PANTHER); IPR002220 (PANTHER); SSF51569 (SUPERFAMILY)
Aqu2.1.28987_001	---NA---	13	0			0	-		no IPS match
Aqu2.1.29223_001	pr domain zinc finger protein 12-like	425	20	0	0.675	5	P:GO:0006351; P:GO:0048793; F:GO:0003676; F:GO:0046872; F:GO:0005515	-	Coil (COILS); IPR015880 (SMART); G3DSA:2.170.270.10 (GENE3D); PF13465 (PFAM); IPR013087 (G3DSA:3.30.160.GENE3D); IPR013087 (G3DSA:3.30.160.GENE3D); IPR001214 (PFAM); IPR013087 (G3DSA:3.30.160.GENE3D); PTHR23228 (PANTHER); IPR017126 (PTHR23228:PANTHER); IPR007087 (PROSITE_PATTERNS); IPR007087 (PROSITE_PATTERNS); IPR007087 (PROSITE_PATTERNS); SIGNAL_PEPTIDE_C_REGION (PHOBIUS); SIGNAL_PEPTIDE_N_REGI…
Aqu2.1.29360_001	nuclear pore complex protein nup205	1973	20	0	0.554	1	C:GO:0005643	-	Coil (COILS); IPR021827 (PFAM); PTHR31344 (PANTHER); PTHR31344:SF0 (PANTHER)
Aqu2.1.29372_001	probable helicase senataxin	2651	20	1.5501e-61	0.4505	8	P:GO:0008033; P:GO:0016180; F:GO:0005524; P:GO:0043144; P:GO:0006369; C:GO:0005634; P:GO:0006364; F:GO:0004386		Coil (COILS); PR01217 (PRINTS); G3DSA:3.40.50.300 (GENE3D); PF13087 (PFAM); PF13086 (PFAM); IPR024481 (PFAM); PTHR10887 (PANTHER); IPR024714 (PTHR10887:PANTHER); IPR027417 (SUPERFAMILY); IPR016024 (SUPERFAMILY)
Aqu2.1.29390_001	low-density lipoprotein receptor-related protein 11	313	9	0	0.561111	0	-		IPR011106 (PFAM); SIGNAL_PEPTIDE_N_REGION (PHOBIUS); SIGNAL_PEPTIDE_H_REGION (PHOBIUS); NON_CYTOPLASMIC_DOMAIN (PHOBIUS); SIGNAL_PEPTIDE (PHOBIUS); SIGNAL_PEPTIDE_C_REGION (PHOBIUS); CYTOPLASMIC_DOMAIN (PHOBIUS); TRANSMEMBRANE (PHOBIUS); IPR013980 (PROSITE_PROFILES); SignalP-noTM (SIGNALP_EUK); TMhelix (TMHMM)
Aqu2.1.29479_001	ras-related c3 botulinum toxin substrate 1	192	20	6.62708e-139	0.906	59	P:GO:0043065; P:GO:0048011; C:GO:0019897; F:GO:0005525; P:GO:0006954; P:GO:0030334; P:GO:0030838; P:GO:0048813; P:GO:0048261; P:GO:0008284; P:GO:0097190; C:GO:0005802; P:GO:0007160; P:GO:0007411; P:GO:0043652; P:GO:0097178; P:GO:0048532; P:GO:0002093; C:GO:0030027; P:GO:0031295; C:GO:0005829; P:GO:0038096; P:GO:0030168; P:GO:0043552; P:GO:0050690; P:GO:0090103; C:GO:0001891; C:GO:0000139; P:GO:00…	-	IPR001806 (PRINTS); IPR003578 (SMART); IPR001806 (PFAM); IPR005225 (TIGRFAM); G3DSA:3.40.50.300 (GENE3D); PTHR24072 (PANTHER); IPR003578 (PROSITE_PROFILES); IPR027417 (SUPERFAMILY)
Aqu2.1.29607_001	---NA---	116	0			0	-		no IPS match
Aqu2.1.29620_001	reverse	151	20	3.60983e-25	0.5685	3	F:GO:0003964; P:GO:0006278; F:GO:0003723		IPR000477 (PFAM); CYTOPLASMIC_DOMAIN (PHOBIUS); TRANSMEMBRANE (PHOBIUS); NON_CYTOPLASMIC_DOMAIN (PHOBIUS); TMhelix (TMHMM)
Aqu2.1.29629_001	uncharacterized protein loc101240054	69	1	3.78264e-06	0.71	0	-		no IPS match
Aqu2.1.29854_001	---NA---	49	0			0	-		no IPS match
Aqu2.1.29861_001	ribosomal protein s6 kinase beta-1	530	20	0	0.746	27	P:GO:0032879; F:GO:0004674; P:GO:0045948; P:GO:0003012; P:GO:0000082; P:GO:0009628; C:GO:0005829; P:GO:0016477; P:GO:0048015; P:GO:0009605; C:GO:0005739; F:GO:0005515; F:GO:0005524; P:GO:0045931; P:GO:0048545; P:GO:0046627; P:GO:0071363; P:GO:0031929; P:GO:0051239; P:GO:0006950; P:GO:0043066; P:GO:0044767; C:GO:0005634; P:GO:0097305; P:GO:0048856; P:GO:0006468; P:GO:0009069	EC:2.7.11.0	IPR002290 (SMART); IPR000961 (SMART); IPR000719 (PFAM); G3DSA:3.30.200.20 (GENE3D); G3DSA:1.10.510.10 (GENE3D); IPR017892 (PFAM); PTHR24351:SF0 (PANTHER); PTHR24351 (PANTHER); IPR008271 (PROSITE_PATTERNS); IPR017441 (PROSITE_PATTERNS); IPR000961 (PROSITE_PROFILES); IPR000719 (PROSITE_PROFILES); IPR011009 (SUPERFAMILY)
Aqu2.1.29862_001	ubiquitin-conjugating enzyme e2 l3	186	20	6.16965e-127	0.8805	10	P:GO:0070979; F:GO:0031625; P:GO:0071385; F:GO:0004842; F:GO:0003713; P:GO:0008283; C:GO:0005737; C:GO:0005634; C:GO:0005667; P:GO:0045941	EC:6.3.2.19	SM00212 (SMART); IPR016135 (G3DSA:3.10.110.GENE3D); IPR000608 (PFAM); PTHR24068:SF1 (PANTHER); PTHR24068 (PANTHER); IPR023313 (PROSITE_PATTERNS); SIGNAL_PEPTIDE_C_REGION (PHOBIUS); SIGNAL_PEPTIDE_N_REGION (PHOBIUS); SIGNAL_PEPTIDE (PHOBIUS); SIGNAL_PEPTIDE_H_REGION (PHOBIUS); NON_CYTOPLASMIC_DOMAIN (PHOBIUS); IPR000608 (PROSITE_PROFILES); IPR016135 (SUPERFAMILY); TMhelix (TMHMM)
Aqu2.1.29892_001	atp synthase subunit mitochondrial	232	20	1.97625e-169	0.5955	3	F:GO:0015078; P:GO:0015986; C:GO:0000276	-	Coil (COILS); IPR008688 (PFAM); IPR013837 (PANTHER); PTHR12733:SF0 (PANTHER); NON_CYTOPLASMIC_DOMAIN (PHOBIUS); TRANSMEMBRANE (PHOBIUS); CYTOPLASMIC_DOMAIN (PHOBIUS); SSF161060 (SUPERFAMILY); TMhelix (TMHMM)
Aqu2.1.29899_001	phosphatidylinositol transfer protein alpha isoform-like	265	20	0	0.768	2	P:GO:0006810; C:GO:0005622		Coil (COILS); IPR001666 (PRINTS); IPR001666 (PFAM); IPR023393 (G3DSA:3.30.530.GENE3D); IPR001666 (PANTHER); SSF55961 (SUPERFAMILY)
Aqu2.1.29910_001	tetratricopeptide repeat protein 7b-like	437	18	6.08456e-180	0.608333	5	P:GO:0009199; P:GO:0009119; F:GO:0016787; P:GO:0009165; P:GO:0009259	-	SIGNAL_PEPTIDE_H_REGION (PHOBIUS); SIGNAL_PEPTIDE_C_REGION (PHOBIUS); SIGNAL_PEPTIDE_N_REGION (PHOBIUS); NON_CYTOPLASMIC_DOMAIN (PHOBIUS); SIGNAL_PEPTIDE (PHOBIUS); SignalP-noTM (SIGNALP_GRAM_NEGATIVE); SignalP-noTM (SIGNALP_EUK); SignalP-TM (SIGNALP_GRAM_POSITIVE)
Aqu2.1.29937_001	glucuronokinase 1-like	637	20	0	0.735	3	P:GO:0009058; F:GO:0016779; F:GO:0005524	-	G3DSA:3.90.550.10 (GENE3D); G3DSA:3.30.70.890 (GENE3D); IPR005835 (PFAM); IPR013750 (PFAM); IPR006204 (PFAM); IPR014721 (G3DSA:3.30.230.GENE3D); PTHR22572 (PANTHER); SSF55060 (SUPERFAMILY); IPR020568 (SUPERFAMILY); SSF53448 (SUPERFAMILY)
Aqu2.1.29967_001	tetratricopeptide repeat protein 7b-like	335	18	0	0.603333	9	F:GO:0004550; P:GO:0006241; F:GO:0016787; P:GO:0006165; P:GO:0006183; P:GO:0006228; F:GO:0005524; P:GO:0006144; P:GO:0006206	EC:2.7.4.6	IPR014716 (G3DSA:3.90.215.GENE3D); SIGNAL_PEPTIDE_N_REGION (PHOBIUS); SIGNAL_PEPTIDE_H_REGION (PHOBIUS); NON_CYTOPLASMIC_DOMAIN (PHOBIUS); SIGNAL_PEPTIDE (PHOBIUS); SIGNAL_PEPTIDE_C_REGION (PHOBIUS); SignalP-TM (SIGNALP_GRAM_POSITIVE); SignalP-noTM (SIGNALP_EUK); IPR002181 (SUPERFAMILY)
Aqu2.1.30011_001	---NA---	44	0			0	-		TRANSMEMBRANE (PHOBIUS); NON_CYTOPLASMIC_DOMAIN (PHOBIUS); CYTOPLASMIC_DOMAIN (PHOBIUS); TMhelix (TMHMM)
Aqu2.1.30046_001	ubiquitin carboxyl-terminal hydrolase isozyme l5	351	20	0	0.7315	15	P:GO:0048853; P:GO:0030901; F:GO:0070628; P:GO:0016579; P:GO:0010951; P:GO:0090304; C:GO:0005829; P:GO:0006511; F:GO:0004843; F:GO:0004221; P:GO:0021670; F:GO:0008242; C:GO:0031011; P:GO:0061136; F:GO:0004866	EC:3.1.2.15; EC:3.4.19.0	Coil (COILS); IPR001578 (PRINTS); IPR017390 (PIRSF); IPR001578 (PFAM); IPR001578 (G3DSA:3.40.532.GENE3D); IPR001578 (PANTHER); PTHR10589:SF16 (PANTHER); SSF54001 (SUPERFAMILY)
Aqu2.1.30255_001	hypothetical protein ETSY2_48770 [Candidatus Entotheonella sp. TSY2]	322	1	3.08374e-08	0.49	0	-		no IPS match
Aqu2.1.30307_001	calmodulin-binding transcription activator 1-like	955	20	0	0.647	2	C:GO:0005634; F:GO:0003677	-	IPR005559 (SMART); IPR005559 (PFAM); PTHR23335 (PANTHER); IPR005559 (PROSITE_PROFILES)
Aqu2.1.30487_001	transcriptional activator gli3	458	20	0	0.573	6	P:GO:0044763; P:GO:0060173; P:GO:0045892; C:GO:0044424; F:GO:0003676; F:GO:0046872	-	IPR015880 (SMART); IPR013087 (G3DSA:3.30.160.GENE3D); IPR013087 (G3DSA:3.30.160.GENE3D); PF13465 (PFAM); IPR013087 (G3DSA:3.30.160.GENE3D); IPR013087 (G3DSA:3.30.160.GENE3D); PTHR19818 (PANTHER); IPR007087 (PROSITE_PATTERNS); IPR007087 (PROSITE_PATTERNS); IPR007087 (PROSITE_PATTERNS); IPR007087 (PROSITE_PATTERNS); SIGNAL_PEPTIDE_H_REGION (PHOBIUS); SIGNAL_PEPTIDE_C_REGION (PHOBIUS); NON_CYTOPLASM…
Aqu2.1.30492_001	---NA---	60	0			0	-		no IPS match
Aqu2.1.30507_001	heat shock cognate 71 kda protein	597	20	0	0.8755	29	C:GO:0009986; P:GO:0045892; C:GO:0070062; P:GO:0006892; P:GO:0019048; C:GO:0005681; F:GO:0051082; C:GO:0043005; C:GO:0061202; P:GO:0007411; F:GO:0005102; C:GO:0005829; C:GO:0000974; P:GO:0051726; P:GO:0051085; P:GO:0006200; P:GO:0008380; P:GO:0006986; C:GO:0005886; F:GO:0042623; F:GO:0005524; C:GO:0042470; F:GO:0043531; P:GO:0006397; C:GO:0005730; C:GO:0043025; P:GO:0007269; C:GO:0008021; P:GO:00…	-	Coil (COILS); IPR013126 (PRINTS); G3DSA:3.30.30.30 (GENE3D); G3DSA:2.60.34.10 (GENE3D); G3DSA:3.30.420.40 (GENE3D); IPR013126 (PFAM); G3DSA:3.90.640.10 (GENE3D); PTHR19375:SF130 (PANTHER); PTHR19375 (PANTHER); IPR018181 (PROSITE_PATTERNS); SSF53067 (SUPERFAMILY); SSF100920 (SUPERFAMILY)
Aqu2.1.30550_001	ankyrin repeat protein rbe_0317-like	836	20	1.74397e-104	0.5385	6	P:GO:0071704; P:GO:0044238; F:GO:0003824; F:GO:0005524; F:GO:0005515; P:GO:0007165	-	IPR002110 (SMART); G3DSA:3.40.50.300 (GENE3D); PF13857 (PFAM); IPR020683 (G3DSA:1.25.40.GENE3D); IPR011029 (G3DSA:1.10.533.GENE3D); PTHR24193 (PANTHER); IPR020683 (PROSITE_PROFILES); IPR000488 (PROSITE_PROFILES); IPR002110 (PROSITE_PROFILES); IPR002110 (PROSITE_PROFILES); IPR027417 (SUPERFAMILY); IPR011029 (SUPERFAMILY); IPR020683 (SUPERFAMILY)
Aqu2.1.30625_001	uncharacterized protein partial	143	20	8.67429e-25	0.581	1	F:GO:0005488	-	no IPS match
Aqu2.1.30728_001	rho guanine nucleotide exchange factor 9 isoform x3	1960	20	0	0.6095	3	F:GO:0005515; P:GO:0035023; F:GO:0005089		Coil (COILS); Coil (COILS); IPR001849 (SMART); IPR001452 (SMART); IPR000219 (SMART); G3DSA:2.30.30.40 (GENE3D); IPR001849 (PFAM); IPR011511 (PFAM); IPR000219 (G3DSA:1.20.900.GENE3D); IPR000219 (PFAM); IPR011993 (G3DSA:2.30.29.GENE3D); PTHR22826 (PANTHER); IPR001331 (PROSITE_PATTERNS); IPR001849 (PROSITE_PROFILES); IPR000219 (PROSITE_PROFILES); IPR001452 (PROSITE_PROFILES); IPR001452 (SUPERFAMILY)…
Aqu2.1.31014_001	plexin-a4 isoform x2	1100	20	0	0.435	8	P:GO:0009653; C:GO:0016021; C:GO:0005622; P:GO:0007165; P:GO:0044767; P:GO:0007399; F:GO:0004872; F:GO:0005515	-	IPR002909 (SMART); IPR016201 (SMART); IPR001627 (SMART); G3DSA:3.30.1680.10 (GENE3D); IPR013783 (G3DSA:2.60.40.GENE3D); IPR013783 (G3DSA:2.60.40.GENE3D); IPR002165 (PFAM); IPR002909 (PFAM); IPR013783 (G3DSA:2.60.40.GENE3D); G3DSA:3.30.1680.10 (GENE3D); PTHR22625:SF16 (PANTHER); PTHR22625 (PANTHER); SIGNAL_PEPTIDE_N_REGION (PHOBIUS); NON_CYTOPLASMIC_DOMAIN (PHOBIUS); SIGNAL_PEPTIDE (PHOBIUS); TRAN…
Aqu2.1.31041_001	letm1 and ef-hand domain-containing protein mitochondrial	1422	20	0	0.6335	2	F:GO:0005509; F:GO:0005515	-	Coil (COILS); Coil (COILS); IPR003961 (SMART); IPR011992 (G3DSA:1.10.238.GENE3D); IPR013783 (G3DSA:2.60.40.GENE3D); IPR011685 (PFAM); IPR003961 (PFAM); IPR013783 (G3DSA:2.60.40.GENE3D); PTHR14009 (PANTHER); PTHR14009:SF1 (PANTHER); NON_CYTOPLASMIC_DOMAIN (PHOBIUS); TRANSMEMBRANE (PHOBIUS); TRANSMEMBRANE (PHOBIUS); CYTOPLASMIC_DOMAIN (PHOBIUS); CYTOPLASMIC_DOMAIN (PHOBIUS); TRANSMEMBRANE (PHOBIUS)…
Aqu2.1.31153_001	leucine-rich repeat serine threonine-protein kinase 1	2135	20	0	0.4805	7	F:GO:0005515; F:GO:0005524; P:GO:0006468; C:GO:0005622; P:GO:0007264; F:GO:0005525; F:GO:0004674	-	SM00364 (SMART); IPR003591 (SMART); IPR002110 (SMART); IPR002290 (SMART); IPR020683 (G3DSA:1.25.40.GENE3D); G3DSA:3.80.10.10 (GENE3D); IPR000719 (PFAM); IPR020683 (PFAM); G3DSA:3.30.70.1390 (GENE3D); IPR020683 (G3DSA:1.25.40.GENE3D); PF13855 (PFAM); G3DSA:1.10.510.10 (GENE3D); IPR013684 (PFAM); IPR001611 (PFAM); G3DSA:3.30.200.20 (GENE3D); G3DSA:3.40.50.300 (GENE3D); PTHR23257:SF88 (PANTHER); PTH…
Aqu2.1.31154_001	rna polymerase ii elongation factor ell	598	20	1.93622e-33	0.4475	2	C:GO:0008023; P:GO:0006368		Coil (COILS); IPR010844 (PFAM); IPR019464 (PFAM); PTHR23288:SF2 (PANTHER); PTHR23288 (PANTHER); SSF144292 (SUPERFAMILY); SSF46785 (SUPERFAMILY)
Aqu2.1.31156_001	40s ribosomal protein s17	151	20	2.17418e-91	0.9425	7	P:GO:0006364; F:GO:0003735; P:GO:0034101; P:GO:0006414; C:GO:0022627; P:GO:0000028; F:GO:0016787	-	IPR001210 (G3DSA:1.10.60.GENE3D); IPR001210 (PFAM); PTHR10732:SF0 (PANTHER); IPR001210 (PANTHER); IPR018273 (PROSITE_PATTERNS); IPR001210 (HAMAP); IPR001210 (SUPERFAMILY)
Aqu2.1.31161_001	deleted in malignant brain tumors 1	819	20	2.38508e-111	0.453	2	C:GO:0016020; F:GO:0005044		IPR001190 (PRINTS); IPR017448 (SMART); IPR001190 (PFAM); G3DSA:3.10.250.10 (GENE3D); PTHR19331:SF8 (PANTHER); PTHR19331 (PANTHER); IPR001190 (PROSITE_PATTERNS); NON_CYTOPLASMIC_DOMAIN (PHOBIUS); SIGNAL_PEPTIDE_C_REGION (PHOBIUS); SIGNAL_PEPTIDE (PHOBIUS); SIGNAL_PEPTIDE_H_REGION (PHOBIUS); TRANSMEMBRANE (PHOBIUS); CYTOPLASMIC_DOMAIN (PHOBIUS); SIGNAL_PEPTIDE_N_REGION (PHOBIUS); IPR001190 (PROSITE…
Aqu2.1.31172_001	---NA---	159	0			0	-		SIGNAL_PEPTIDE (PHOBIUS); SIGNAL_PEPTIDE_N_REGION (PHOBIUS); NON_CYTOPLASMIC_DOMAIN (PHOBIUS); SIGNAL_PEPTIDE_C_REGION (PHOBIUS); SIGNAL_PEPTIDE_H_REGION (PHOBIUS); SignalP-TM (SIGNALP_GRAM_POSITIVE); SignalP-noTM (SIGNALP_GRAM_NEGATIVE); SignalP-noTM (SIGNALP_EUK)
Aqu2.1.31177_001	tnf receptor-associated factor 5-like	529	20	6.24339e-134	0.549	5	P:GO:0050794; F:GO:0008270; F:GO:0005515; P:GO:0016567; F:GO:0004842	-	IPR001841 (SMART); IPR002083 (SMART); IPR002083 (PFAM); IPR013083 (G3DSA:3.30.40.GENE3D); IPR013323 (G3DSA:3.90.890.GENE3D); G3DSA:2.60.210.10 (GENE3D); PF02176 (PFAM); PTHR10131 (PANTHER); IPR001293 (PROSITE_PROFILES); IPR002083 (PROSITE_PROFILES); IPR001841 (PROSITE_PROFILES); SSF57850 (SUPERFAMILY); IPR008974 (SUPERFAMILY)
Aqu2.1.31184_001	yth domain family protein 2	502	20	0	0.745	0	-		IPR007275 (PFAM); PTHR12357:SF10 (PANTHER); PTHR12357 (PANTHER); IPR007275 (PROSITE_PROFILES)
Aqu2.1.31192_001	PREDICTED: hypothetical protein LOC100636955 [Amphimedon queenslandica]	153	1	3.09585e-95	1	0	-		IPR010510 (PFAM); SIGNAL_PEPTIDE_C_REGION (PHOBIUS); SIGNAL_PEPTIDE_N_REGION (PHOBIUS); NON_CYTOPLASMIC_DOMAIN (PHOBIUS); SIGNAL_PEPTIDE_H_REGION (PHOBIUS); SIGNAL_PEPTIDE (PHOBIUS); SignalP-noTM (SIGNALP_EUK)
Aqu2.1.31337_001	probable atp-dependent rna helicase dhx34	1146	20	0	0.668	3	F:GO:0005524; F:GO:0003676; F:GO:0008026	-	Coil (COILS); IPR007502 (SMART); IPR001650 (SMART); IPR014001 (SMART); IPR007502 (PFAM); G3DSA:3.40.50.300 (GENE3D); IPR011545 (PFAM); G3DSA:3.40.50.300 (GENE3D); IPR011709 (PFAM); IPR001650 (PFAM); PTHR18934 (PANTHER); PTHR18934:SF68 (PANTHER); IPR014001 (PROSITE_PROFILES); IPR001650 (PROSITE_PROFILES); IPR027417 (SUPERFAMILY)
Aqu2.1.31344_001	endophilin-a3	351	20	0	0.711	2	C:GO:0005737; F:GO:0005515	-	IPR001452 (PRINTS); IPR001452 (SMART); IPR004148 (SMART); IPR027267 (G3DSA:1.20.1270.GENE3D); PF14604 (PFAM); G3DSA:2.30.30.40 (GENE3D); IPR004148 (PFAM); PTHR10661 (PANTHER); IPR028501 (PTHR10661:PANTHER); IPR004148 (PROSITE_PROFILES); IPR001452 (PROSITE_PROFILES); SSF103657 (SUPERFAMILY); IPR001452 (SUPERFAMILY)
Aqu2.1.31351_001	GATAD2B	978	20	0	0.445	8	P:GO:0006355; F:GO:0043565; F:GO:0008270; F:GO:0003700; C:GO:0005634; C:GO:0016607; P:GO:0006351; C:GO:0005730		Coil (COILS); Coil (COILS)
Aqu2.1.31482_001	tetratricopeptide repeat protein 7b-like	493	20	1.02126e-75	0.6015	5	P:GO:0009199; P:GO:0009119; F:GO:0016787; P:GO:0009165; P:GO:0009259	-	IPR014716 (G3DSA:3.90.215.GENE3D); TRANSMEMBRANE (PHOBIUS); CYTOPLASMIC_DOMAIN (PHOBIUS); NON_CYTOPLASMIC_DOMAIN (PHOBIUS); IPR002181 (SUPERFAMILY); TMhelix (TMHMM)
Aqu2.1.31488_001	---NA---	77	0			0	-		CYTOPLASMIC_DOMAIN (PHOBIUS); TRANSMEMBRANE (PHOBIUS); NON_CYTOPLASMIC_DOMAIN (PHOBIUS); SignalP-noTM (SIGNALP_EUK)
Aqu2.1.31566_001	dde superfamily endonuclease cenp b	107	20	4.72431e-34	0.6125	1	F:GO:0003677	-	IPR007889 (PFAM); PTHR19303 (PANTHER); PTHR19303:SF64 (PANTHER); IPR009057 (SUPERFAMILY)
Aqu2.1.31574_001	IRF2	600	20	0	0.661	6	P:GO:0006355; F:GO:0000975; F:GO:0003700; C:GO:0005667; P:GO:0045449; F:GO:0005515	-	IPR001346 (PRINTS); IPR001346 (SMART); IPR019471 (PFAM); IPR011991 (G3DSA:1.10.10.GENE3D); IPR017855 (G3DSA:2.60.200.GENE3D); IPR001346 (PFAM); PTHR11949 (PANTHER); IPR019817 (PROSITE_PATTERNS); IPR001346 (PROSITE_PROFILES); SSF46785 (SUPERFAMILY); IPR008984 (SUPERFAMILY)
Aqu2.1.31625_001	apolipoprotein a1 a4 partial	2058	20	6.40498e-69	0.541	5	P:GO:0009199; P:GO:0009119; F:GO:0016787; P:GO:0009165; P:GO:0009259	-	TRANSMEMBRANE (PHOBIUS); NON_CYTOPLASMIC_DOMAIN (PHOBIUS); CYTOPLASMIC_DOMAIN (PHOBIUS)
Aqu2.1.31629_001	PREDICTED: hypothetical protein LOC100639574 [Amphimedon queenslandica]	109	1	7.01567e-07	0.66	3	P:GO:0015074; P:GO:0006310; F:GO:0003677		NON_CYTOPLASMIC_DOMAIN (PHOBIUS); TRANSMEMBRANE (PHOBIUS); CYTOPLASMIC_DOMAIN (PHOBIUS); TMhelix (TMHMM)
Aqu2.1.31783_001	bile acid beta-glucosidase	473	11	8.54899e-165	0.499091	3	P:GO:0006665; C:GO:0016021; F:GO:0004348		IPR006775 (PFAM); IPR012341 (G3DSA:1.50.10.GENE3D); PTHR12654:SF1 (PANTHER); PTHR12654 (PANTHER); IPR008928 (SUPERFAMILY)
Aqu2.1.31786_001	tyrosine-protein kinase abl1 isoform x3	813	20	0	0.714	37	P:GO:0043065; F:GO:0003785; F:GO:0017124; P:GO:0051149; P:GO:0006298; F:GO:0008022; P:GO:0006975; P:GO:0042770; P:GO:0007411; P:GO:0051353; C:GO:0005829; C:GO:0015629; P:GO:0007596; F:GO:0000287; P:GO:0038096; P:GO:2001020; F:GO:0030145; P:GO:0010506; F:GO:0004515; P:GO:2000249; F:GO:0070064; P:GO:0050731; P:GO:0045087; P:GO:0030155; C:GO:0048471; F:GO:0003677; F:GO:0005524; P:GO:2000145; P:GO:00…	EC:2.7.7.18; EC:2.7.10.2	IPR000980 (PRINTS); IPR001245 (PRINTS); IPR000980 (SMART); IPR001452 (SMART); IPR020635 (SMART); PF14604 (PFAM); G3DSA:2.30.30.40 (GENE3D); IPR000980 (PFAM); IPR001245 (PFAM); G3DSA:3.30.200.20 (GENE3D); IPR000980 (G3DSA:3.30.505.GENE3D); G3DSA:1.10.510.10 (GENE3D); PTHR24418:SF11 (PANTHER); PTHR24418 (PANTHER); IPR017441 (PROSITE_PATTERNS); IPR008266 (PROSITE_PATTERNS); IPR000719 (PROSITE_PROFIL…
Aqu2.1.31917_001	ig-like domain-containing protein	787	20	0	0.499	2	C:GO:0016021; P:GO:0007154	-	IPR003644 (PFAM); PTHR23343 (PANTHER); PTHR23343:SF15 (PANTHER); SIGNAL_PEPTIDE_N_REGION (PHOBIUS); SIGNAL_PEPTIDE (PHOBIUS); SIGNAL_PEPTIDE_H_REGION (PHOBIUS); CYTOPLASMIC_DOMAIN (PHOBIUS); SIGNAL_PEPTIDE_C_REGION (PHOBIUS); NON_CYTOPLASMIC_DOMAIN (PHOBIUS); TRANSMEMBRANE (PHOBIUS); SignalP-noTM (SIGNALP_EUK); SignalP-noTM (SIGNALP_GRAM_NEGATIVE); SignalP-TM (SIGNALP_GRAM_POSITIVE); SSF141072 (S…
Aqu2.1.31939_001	squalene synthase-like	410	20	0	0.7615	4	C:GO:0016021; F:GO:0004310; P:GO:0006694; P:GO:0016114	EC:2.5.1.21	IPR002060 (PFAM); IPR006449 (TIGRFAM); IPR008949 (G3DSA:1.10.600.GENE3D); PTHR11626:SF0 (PANTHER); PTHR11626 (PANTHER); IPR019845 (PROSITE_PATTERNS); IPR019845 (PROSITE_PATTERNS); CYTOPLASMIC_DOMAIN (PHOBIUS); TRANSMEMBRANE (PHOBIUS); NON_CYTOPLASMIC_DOMAIN (PHOBIUS); TRANSMEMBRANE (PHOBIUS); NON_CYTOPLASMIC_DOMAIN (PHOBIUS); IPR008949 (SUPERFAMILY)
Aqu2.1.32090_001	---NA---	86	0			0	-		no IPS match
Aqu2.1.32127_001	inversin isoform x7	793	20	0	0.5735	4	C:GO:0043229; P:GO:0090090; F:GO:0005515; P:GO:0007275	-	Coil (COILS); IPR002110 (PRINTS); IPR000048 (SMART); IPR002110 (SMART); IPR020683 (G3DSA:1.25.40.GENE3D); IPR020683 (G3DSA:1.25.40.GENE3D); IPR020683 (G3DSA:1.25.40.GENE3D); IPR000048 (PFAM); PF13637 (PFAM); IPR002110 (PFAM); IPR020683 (PFAM); IPR020683 (G3DSA:1.25.40.GENE3D); PTHR24178 (PANTHER); IPR000048 (PROSITE_PROFILES); IPR002110 (PROSITE_PROFILES); IPR002110 (PROSITE_PROFILES); IPR002110 …
Aqu2.1.32142_001	---NA---	42	0			0	-		no IPS match
Aqu2.1.32251_001	leucine-rich repeat serine threonine-protein kinase 2	1018	20	0	0.637	24	F:GO:0005525; F:GO:0004672; C:GO:0043005; C:GO:0005802; P:GO:0050767; P:GO:0009966; P:GO:0043085; P:GO:0010508; P:GO:0016043; C:GO:0045121; P:GO:0001934; F:GO:0017048; C:GO:0005886; F:GO:0042802; P:GO:0007264; P:GO:0008219; F:GO:0005524; P:GO:0048523; P:GO:0035564; P:GO:0032436; P:GO:0006184; P:GO:0051093; P:GO:0000165; C:GO:0008021	-	IPR003591 (SMART); SM00364 (SMART); IPR002110 (SMART); G3DSA:3.80.10.10 (GENE3D); G3DSA:3.40.50.300 (GENE3D); G3DSA:3.30.70.1390 (GENE3D); IPR020683 (PFAM); G3DSA:3.10.20.240 (GENE3D); PF13855 (PFAM); IPR020683 (G3DSA:1.25.40.GENE3D); IPR013684 (PFAM); PTHR23155 (PANTHER); IPR020859 (PROSITE_PROFILES); IPR002110 (PROSITE_PROFILES); IPR020683 (PROSITE_PROFILES); IPR001611 (PROSITE_PROFILES); IPR00…
Aqu2.1.32274_001	usherin	4885	20	0	0.4795	2	P:GO:0044707; F:GO:0005515	-	PR00011 (PRINTS); IPR001791 (SMART); IPR002049 (SMART); IPR008211 (SMART); IPR003961 (SMART); IPR001791 (PFAM); IPR008211 (PFAM); G3DSA:2.10.25.10 (GENE3D); PF13385 (PFAM); IPR002049 (PFAM); IPR013783 (G3DSA:2.60.40.GENE3D); IPR003961 (PFAM); IPR013320 (G3DSA:2.60.120.GENE3D); PTHR10574 (PANTHER); IPR002049 (PROSITE_PATTERNS); NON_CYTOPLASMIC_DOMAIN (PHOBIUS); SIGNAL_PEPTIDE (PHOBIUS); CYTOPLASMI…
Aqu2.1.32475_001	exportin-2 isoform x1	970	20	0	0.7525	4	F:GO:0008536; P:GO:0007589; P:GO:0006886; C:GO:0005634	-	IPR001494 (SMART); IPR005043 (PFAM); IPR001494 (PFAM); IPR011989 (G3DSA:1.25.10.GENE3D); IPR013713 (PFAM); PTHR10997:SF8 (PANTHER); PTHR10997 (PANTHER); IPR001494 (PROSITE_PROFILES); IPR016024 (SUPERFAMILY)
Aqu2.1.32478_001	ependymin-like protein precursor	588	5	2.36213e-13	0.414	3	P:GO:0007160; F:GO:0005509; C:GO:0005576		SIGNAL_PEPTIDE_H_REGION (PHOBIUS); NON_CYTOPLASMIC_DOMAIN (PHOBIUS); SIGNAL_PEPTIDE_N_REGION (PHOBIUS); SIGNAL_PEPTIDE_C_REGION (PHOBIUS); SIGNAL_PEPTIDE (PHOBIUS); SignalP-noTM (SIGNALP_GRAM_NEGATIVE); SignalP-noTM (SIGNALP_EUK); SignalP-TM (SIGNALP_GRAM_POSITIVE); TMhelix (TMHMM)
Aqu2.1.32501_001	protein phosphatase 1b-like isoform x1	480	20	0	0.6815	5	P:GO:0030512; F:GO:0000287; F:GO:0030145; F:GO:0004722; P:GO:0006470	-	Coil (COILS); IPR001932 (SMART); IPR001932 (SMART); IPR001932 (G3DSA:3.60.40.GENE3D); IPR001932 (PFAM); IPR012911 (PFAM); PTHR13832:SF90 (PANTHER); IPR015655 (PANTHER); IPR000222 (PROSITE_PATTERNS); IPR001932 (SUPERFAMILY)
Aqu2.1.32541_001	cell surface repetitive cell surface	1990	3	0	0.726667	2	F:GO:0005515; F:GO:0046872		Coil (COILS); Coil (COILS); IPR001680 (SMART); IPR018391 (SMART); IPR015880 (SMART); IPR001680 (PFAM); IPR015943 (G3DSA:2.130.10.GENE3D); IPR015943 (G3DSA:2.130.10.GENE3D); PTHR14435 (PANTHER); IPR019775 (PROSITE_PATTERNS); IPR007087 (PROSITE_PATTERNS); IPR007087 (PROSITE_PATTERNS); IPR007087 (PROSITE_PATTERNS); TRANSMEMBRANE (PHOBIUS); NON_CYTOPLASMIC_DOMAIN (PHOBIUS); CYTOPLASMIC_DOMAIN (PHOBIU…
Aqu2.1.32549_001	ZNF410	631	20	0	0.7305	2	F:GO:0003676; F:GO:0046872	-	IPR015880 (SMART); IPR013087 (G3DSA:3.30.160.GENE3D); IPR013087 (G3DSA:3.30.160.GENE3D); IPR007087 (PFAM); PF13465 (PFAM); PTHR11389 (PANTHER); IPR007087 (PROSITE_PATTERNS); IPR007087 (PROSITE_PATTERNS); IPR007087 (PROSITE_PATTERNS); IPR007087 (PROSITE_PATTERNS); IPR007087 (PROSITE_PATTERNS); IPR007087 (PROSITE_PROFILES); IPR007087 (PROSITE_PROFILES); IPR007087 (PROSITE_PROFILES); IPR007087 (PROS…
Aqu2.1.32583_001	membrane protein	1274	20	2.15166e-46	0.4015	12	C:GO:0005727; C:GO:0016021; C:GO:0016020; P:GO:0006812; F:GO:0016787; F:GO:0000166; F:GO:0005524; F:GO:0005388; F:GO:0019829; F:GO:0046872; P:GO:0070588; C:GO:0019867		IPR006626 (SMART); IPR003368 (TIGRFAM); IPR012334 (G3DSA:2.160.20.GENE3D); CYTOPLASMIC_DOMAIN (PHOBIUS); SIGNAL_PEPTIDE_N_REGION (PHOBIUS); TRANSMEMBRANE (PHOBIUS); CYTOPLASMIC_DOMAIN (PHOBIUS); CYTOPLASMIC_DOMAIN (PHOBIUS); TRANSMEMBRANE (PHOBIUS); TRANSMEMBRANE (PHOBIUS); NON_CYTOPLASMIC_DOMAIN (PHOBIUS); SIGNAL_PEPTIDE_H_REGION (PHOBIUS); NON_CYTOPLASMIC_DOMAIN (PHOBIUS); NON_CYTOPLASMIC_DOMAI…
Aqu2.1.32603_001	polyadenylate-binding protein 1	618	20	0	0.702	16	P:GO:0031047; F:GO:0008022; F:GO:0000166; P:GO:1900153; F:GO:0008143; C:GO:0005829; C:GO:0071013; C:GO:0010494; P:GO:0048255; P:GO:2000623; P:GO:0060213; F:GO:0008494; P:GO:0000398; P:GO:0006378; C:GO:0005840; P:GO:0045948	-	Coil (COILS); IPR002004 (SMART); IPR000504 (SMART); IPR006515 (TIGRFAM); IPR002004 (PFAM); IPR000504 (PFAM); IPR012677 (G3DSA:3.30.70.GENE3D); IPR002004 (G3DSA:1.10.1900.GENE3D); PTHR24011 (PANTHER); PTHR24011:SF45 (PANTHER); IPR002004 (PROSITE_PROFILES); IPR000504 (PROSITE_PROFILES); SSF54928 (SUPERFAMILY); IPR002004 (SUPERFAMILY)
Aqu2.1.32604_001	very-long-chain -3-hydroxyacyl-	241	20	2.48795e-174	0.6595	0	-		IPR007482 (PFAM); IPR007482 (PANTHER); TRANSMEMBRANE (PHOBIUS); CYTOPLASMIC_DOMAIN (PHOBIUS); NON_CYTOPLASMIC_DOMAIN (PHOBIUS); TRANSMEMBRANE (PHOBIUS); TRANSMEMBRANE (PHOBIUS); CYTOPLASMIC_DOMAIN (PHOBIUS); TRANSMEMBRANE (PHOBIUS); NON_CYTOPLASMIC_DOMAIN (PHOBIUS); NON_CYTOPLASMIC_DOMAIN (PHOBIUS); TRANSMEMBRANE (PHOBIUS); CYTOPLASMIC_DOMAIN (PHOBIUS); TMhelix (TMHMM); TMhelix (TMHMM); TMhelix (…
Aqu2.1.32722_001	glycerol kinase-like isoform x2	555	20	0	0.723	5	F:GO:0004370; P:GO:0005975; P:GO:0006072; P:GO:0016310; P:GO:0046486	EC:2.7.1.30	PIRSF000538 (PIRSF); IPR018485 (PFAM); G3DSA:3.30.420.40 (GENE3D); IPR005999 (TIGRFAM); IPR018484 (PFAM); PTHR10196:SF9 (PANTHER); PTHR10196 (PANTHER); IPR018483 (PROSITE_PATTERNS); IPR018483 (PROSITE_PATTERNS); CYTOPLASMIC_DOMAIN (PHOBIUS); NON_CYTOPLASMIC_DOMAIN (PHOBIUS); TRANSMEMBRANE (PHOBIUS); SSF53067 (SUPERFAMILY); TMhelix (TMHMM)
Aqu2.1.32748_001	upf0394 inner membrane protein yeee-like	368	20	2.30933e-125	0.5895	0	-		IPR007272 (PFAM); CYTOPLASMIC_DOMAIN (PHOBIUS); TRANSMEMBRANE (PHOBIUS); SIGNAL_PEPTIDE_C_REGION (PHOBIUS); SIGNAL_PEPTIDE_H_REGION (PHOBIUS); NON_CYTOPLASMIC_DOMAIN (PHOBIUS); SIGNAL_PEPTIDE (PHOBIUS); CYTOPLASMIC_DOMAIN (PHOBIUS); TRANSMEMBRANE (PHOBIUS); CYTOPLASMIC_DOMAIN (PHOBIUS); NON_CYTOPLASMIC_DOMAIN (PHOBIUS); NON_CYTOPLASMIC_DOMAIN (PHOBIUS); TRANSMEMBRANE (PHOBIUS); CYTOPLASMIC_DOMAIN…
Aqu2.1.32869_001	ylp motif-containing protein 1	584	20	0	0.6405	5	P:GO:0000122; F:GO:0005515; P:GO:0032204; F:GO:0001078; C:GO:0005634	-	PF13671 (PFAM); G3DSA:3.40.50.300 (GENE3D); PTHR13413:SF0 (PANTHER); IPR026314 (PANTHER); IPR027417 (SUPERFAMILY)
Aqu2.1.32875_001	zinc finger ccch domain-containing protein 14 isoform x3	546	20	0	0.6395	2	F:GO:0046872; C:GO:0005634	-	Coil (COILS); PF14608 (PFAM); PTHR14738 (PANTHER); PTHR14738:SF6 (PANTHER); IPR000571 (PROSITE_PROFILES)
Aqu2.1.32878_001	---NA---	76	0			0	-		SIGNAL_PEPTIDE_N_REGION (PHOBIUS); SIGNAL_PEPTIDE (PHOBIUS); TRANSMEMBRANE (PHOBIUS); SIGNAL_PEPTIDE_C_REGION (PHOBIUS); CYTOPLASMIC_DOMAIN (PHOBIUS); NON_CYTOPLASMIC_DOMAIN (PHOBIUS); SIGNAL_PEPTIDE_H_REGION (PHOBIUS); SignalP-TM (SIGNALP_EUK); SignalP-TM (SIGNALP_GRAM_POSITIVE); SignalP-TM (SIGNALP_GRAM_NEGATIVE); TMhelix (TMHMM); TMhelix (TMHMM)
Aqu2.1.32880_001	polyphosphoinositide phosphatase- partial	434	20	8.85418e-178	0.6365	3	F:GO:0016301; P:GO:0016310; F:GO:0005515	-	IPR015915 (G3DSA:2.120.10.GENE3D); PF13415 (PFAM); PTHR23244 (PANTHER); SSF117281 (SUPERFAMILY)
Aqu2.1.32900_001	uncharacterized protein loc734489	453	20	8.65983e-113	0.5055	0	-		IPR008166 (PFAM); PTHR21461:SF0 (PANTHER); PTHR21461 (PANTHER); NON_CYTOPLASMIC_DOMAIN (PHOBIUS); SIGNAL_PEPTIDE (PHOBIUS); SIGNAL_PEPTIDE_N_REGION (PHOBIUS); SIGNAL_PEPTIDE_C_REGION (PHOBIUS); SIGNAL_PEPTIDE_H_REGION (PHOBIUS); SignalP-TM (SIGNALP_GRAM_POSITIVE); SignalP-noTM (SIGNALP_EUK); TMhelix (TMHMM)
Aqu2.1.32913_001	predicted protein [Nematostella vectensis]	718	1	7.75732e-10	0.4	0	-		Coil (COILS); SignalP-noTM (SIGNALP_EUK)
Aqu2.1.32924_001	leucine-rich repeat-containing protein 58-like	358	20	0	0.634	1	F:GO:0005515		PF13504 (PFAM); PF13855 (PFAM); IPR025875 (PFAM); G3DSA:3.80.10.10 (GENE3D); PTHR23155 (PANTHER); PTHR23155:SF25 (PANTHER); IPR001611 (PROSITE_PROFILES); SSF52058 (SUPERFAMILY)
Aqu2.1.32944_001	ef-hand calcium-binding domain-containing protein 11- partial	466	1	1.67698e-33	0.66	0	-		Coil (COILS); G3DSA:2.80.10.50 (GENE3D); G3DSA:2.80.10.50 (GENE3D)
Aqu2.1.32959_001	cationic amino acid transporter	174	20	2.37137e-118	0.596	3	P:GO:0003333; F:GO:0015171; C:GO:0016021	-	PF13906 (PFAM); IPR002293 (PANTHER); PTHR11785:SF177 (PANTHER); TRANSMEMBRANE (PHOBIUS); NON_CYTOPLASMIC_DOMAIN (PHOBIUS); CYTOPLASMIC_DOMAIN (PHOBIUS); TRANSMEMBRANE (PHOBIUS); CYTOPLASMIC_DOMAIN (PHOBIUS); CYTOPLASMIC_DOMAIN (PHOBIUS); NON_CYTOPLASMIC_DOMAIN (PHOBIUS); TRANSMEMBRANE (PHOBIUS); TRANSMEMBRANE (PHOBIUS); TMhelix (TMHMM); TMhelix (TMHMM); TMhelix (TMHMM); TMhelix (TMHMM)
Aqu2.1.32998_001	---NA---	25	0			0	-		no IPS match
Aqu2.1.33025_001	isoform b	272	20	4.58376e-16	0.4365	3	F:GO:0003674; P:GO:0008150; C:GO:0005575		SIGNAL_PEPTIDE (PHOBIUS); SIGNAL_PEPTIDE_N_REGION (PHOBIUS); SIGNAL_PEPTIDE_C_REGION (PHOBIUS); NON_CYTOPLASMIC_DOMAIN (PHOBIUS); SIGNAL_PEPTIDE_H_REGION (PHOBIUS); PS51257 (PROSITE_PROFILES); TMhelix (TMHMM)
Aqu2.1.33027_001	smith-magenis syndrome chromosomal region candidate gene 8 protein	868	20	5.41703e-41	0.5255	1	C:GO:0005634		Coil (COILS); IPR021713 (PFAM); PTHR31334 (PANTHER)
Aqu2.1.33044_001	short-chain collagen c4-like	50	20	3.44845e-15	0.6745	0	-		no IPS match
Aqu2.1.33103_001	cytochrome c oxidase subunit mitochondrial-like	122	20	1.30606e-84	0.647	4	C:GO:0005751; F:GO:0004129; P:GO:0006123; P:GO:0015992	EC:1.9.3.1	IPR001349 (PIRSF); IPR001349 (G3DSA:4.10.95.GENE3D); IPR001349 (PFAM); IPR001349 (PANTHER); IPR018507 (PROSITE_PATTERNS); NON_CYTOPLASMIC_DOMAIN (PHOBIUS); TRANSMEMBRANE (PHOBIUS); CYTOPLASMIC_DOMAIN (PHOBIUS); IPR001349 (PRODOM); IPR001349 (SUPERFAMILY)
Aqu2.1.33324_001	protocadherin fat 4	10226	20	0	0.4625	4	F:GO:0005509; P:GO:0007156; C:GO:0005886; F:GO:0030246		IPR002126 (PRINTS); IPR002126 (SMART); IPR002126 (G3DSA:2.60.40.GENE3D); IPR002126 (G3DSA:2.60.40.GENE3D); IPR002126 (G3DSA:2.60.40.GENE3D); IPR002126 (PFAM); IPR002126 (G3DSA:2.60.40.GENE3D); IPR002126 (G3DSA:2.60.40.GENE3D); IPR002126 (G3DSA:2.60.40.GENE3D); PTHR24027:SF132 (PANTHER); PTHR24027 (PANTHER); IPR020894 (PROSITE_PATTERNS); IPR020894 (PROSITE_PATTERNS); IPR020894 (PROSITE_PATTERNS); …
Aqu2.1.33325_001	general transcription factor 3c polypeptide 3	875	20	6.73506e-133	0.489	1	F:GO:0005515		IPR019734 (SMART); IPR011990 (G3DSA:1.25.40.GENE3D); PTHR23082 (PANTHER); IPR019734 (PROSITE_PROFILES); IPR013026 (PROSITE_PROFILES); IPR019734 (PROSITE_PROFILES); IPR019734 (PROSITE_PROFILES); IPR019734 (PROSITE_PROFILES); IPR013026 (PROSITE_PROFILES); IPR019734 (PROSITE_PROFILES); IPR013026 (PROSITE_PROFILES); SSF48452 (SUPERFAMILY); SSF48452 (SUPERFAMILY)
Aqu2.1.33326_001	---NA---	237	0			0	-		TRANSMEMBRANE (PHOBIUS); CYTOPLASMIC_DOMAIN (PHOBIUS); TRANSMEMBRANE (PHOBIUS); NON_CYTOPLASMIC_DOMAIN (PHOBIUS); TRANSMEMBRANE (PHOBIUS); CYTOPLASMIC_DOMAIN (PHOBIUS); CYTOPLASMIC_DOMAIN (PHOBIUS); NON_CYTOPLASMIC_DOMAIN (PHOBIUS); TRANSMEMBRANE (PHOBIUS); TMhelix (TMHMM); TMhelix (TMHMM); TMhelix (TMHMM)
Aqu2.1.33332_001	ankyrin repeat domain-containing protein 6 isoform x1	700	20	1.11147e-25	0.5715	2	P:GO:0009966; F:GO:0005515	-	Coil (COILS); IPR002110 (PRINTS); IPR002110 (SMART); IPR020683 (G3DSA:1.25.40.GENE3D); IPR020683 (PFAM); PTHR24198 (PANTHER); IPR002110 (PROSITE_PROFILES); IPR020683 (PROSITE_PROFILES); IPR002110 (PROSITE_PROFILES); IPR002110 (PROSITE_PROFILES); IPR020683 (SUPERFAMILY)
Aqu2.1.33380_001	---NA---	135	0			0	-		NON_CYTOPLASMIC_DOMAIN (PHOBIUS); TRANSMEMBRANE (PHOBIUS); NON_CYTOPLASMIC_DOMAIN (PHOBIUS); CYTOPLASMIC_DOMAIN (PHOBIUS); TRANSMEMBRANE (PHOBIUS); TRANSMEMBRANE (PHOBIUS); CYTOPLASMIC_DOMAIN (PHOBIUS); TMhelix (TMHMM); TMhelix (TMHMM)
Aqu2.1.33396_001	e3 ubiquitin-protein ligase trim23-like	764	9	2.07851e-14	0.458889	2	F:GO:0008270; F:GO:0005515		Coil (COILS); IPR001841 (SMART); IPR013783 (G3DSA:2.60.40.GENE3D); IPR001841 (PFAM); IPR003961 (PFAM); IPR013083 (G3DSA:3.30.40.GENE3D); PTHR24103:SF134 (PANTHER); PTHR24103 (PANTHER); IPR017907 (PROSITE_PATTERNS); IPR001841 (PROSITE_PROFILES); IPR003961 (PROSITE_PROFILES); SSF57850 (SUPERFAMILY); IPR003961 (SUPERFAMILY)
Aqu2.1.33397_001	hypothetical protein COCSUDRAFT_60000 [Coccomyxa subellipsoidea C-169]	692	5	4.9924e-09	0.486	2	F:GO:0005515; F:GO:0008270		Coil (COILS); IPR003961 (SMART); IPR001841 (SMART); IPR018957 (PFAM); IPR013083 (G3DSA:3.30.40.GENE3D); IPR003961 (PFAM); IPR013783 (G3DSA:2.60.40.GENE3D); PTHR24103 (PANTHER); IPR017907 (PROSITE_PATTERNS); IPR001841 (PROSITE_PROFILES); IPR003961 (PROSITE_PROFILES); IPR003961 (SUPERFAMILY); SSF57850 (SUPERFAMILY)
Aqu2.1.33447_001	ras guanine nucleotide exchange factor	1127	20	0	0.597	4	F:GO:0005085; P:GO:0051056; C:GO:0005622; P:GO:0043087	-	IPR001895 (SMART); IPR000651 (SMART); IPR001895 (G3DSA:1.10.840.GENE3D); G3DSA:1.20.870.10 (GENE3D); IPR001895 (PFAM); IPR000651 (PFAM); PTHR23113:SF87 (PANTHER); IPR008937 (PANTHER); IPR019804 (PROSITE_PATTERNS); IPR001895 (PROSITE_PROFILES); IPR000651 (PROSITE_PROFILES); IPR023578 (SUPERFAMILY)
Aqu2.1.33448_001	fibrocystin-l	4758	20	0	0.546	1	F:GO:0005515		IPR002909 (SMART); IPR001283 (SMART); IPR006626 (SMART); IPR014044 (G3DSA:3.40.33.GENE3D); IPR005301 (PFAM); IPR002909 (PFAM); IPR014044 (PFAM); IPR013783 (G3DSA:2.60.40.GENE3D); IPR008972 (G3DSA:2.60.40.GENE3D); IPR019316 (PFAM); IPR011658 (PFAM); IPR011658 (G3DSA:3.90.182.GENE3D); IPR005301 (G3DSA:1.20.140.GENE3D); IPR013783 (G3DSA:2.60.40.GENE3D); IPR013783 (G3DSA:2.60.40.GENE3D); IPR013783 (G…
Aqu2.1.33449_001	---NA---	32	0			0	-		no IPS match
Aqu2.1.33453_001	rhabdoid tumor deletion region protein 1	340	20	0	0.5955	1	F:GO:0005515		PF13513 (PFAM); IPR011989 (G3DSA:1.25.10.GENE3D); PTHR15599:SF1 (PANTHER); PTHR15599 (PANTHER); IPR000225 (PROSITE_PROFILES); IPR016024 (SUPERFAMILY)
Aqu2.1.33474_001	glycoside hydrolase 15-like protein	276	20	7.02146e-144	0.6225	1	F:GO:0003824	-	IPR006869 (PFAM); PTHR23054:SF0 (PANTHER); PTHR23054 (PANTHER)
Aqu2.1.33494_001	rap guanine nucleotide exchange factor 6-like isoform x9	1396	20	1.87185e-152	0.526	4	F:GO:0005515; F:GO:0005085; C:GO:0005622; P:GO:0051056	-	Coil (COILS); Coil (COILS); IPR001478 (SMART); IPR001895 (SMART); IPR000595 (SMART); IPR000651 (SMART); G3DSA:2.30.42.10 (GENE3D); IPR000651 (PFAM); IPR001895 (PFAM); IPR000595 (PFAM); G3DSA:1.20.870.10 (GENE3D); IPR014710 (G3DSA:2.60.120.GENE3D); IPR001895 (G3DSA:1.10.840.GENE3D); IPR001478 (PFAM); PTHR23113:SF21 (PANTHER); IPR008937 (PANTHER); IPR019804 (PROSITE_PATTERNS); IPR000595 (PROSITE_PR…
Aqu2.1.33513_001	PREDICTED: hypothetical protein LOC100632424 [Amphimedon queenslandica]	500	5	3.7147e-78	0.554	0	-		IPR013783 (G3DSA:2.60.40.GENE3D); SIGNAL_PEPTIDE_N_REGION (PHOBIUS); SIGNAL_PEPTIDE_C_REGION (PHOBIUS); TRANSMEMBRANE (PHOBIUS); SIGNAL_PEPTIDE_H_REGION (PHOBIUS); SIGNAL_PEPTIDE (PHOBIUS); NON_CYTOPLASMIC_DOMAIN (PHOBIUS); CYTOPLASMIC_DOMAIN (PHOBIUS); SignalP-noTM (SIGNALP_EUK); TMhelix (TMHMM)
Aqu2.1.33515_001	---NA---	31	0			0	-		no IPS match
Aqu2.1.33554_001	tetratricopeptide repeat protein 7b-like	425	18	3.38249e-151	0.589444	2	F:GO:0016787; P:GO:0009117	-	IPR014716 (G3DSA:3.90.215.GENE3D); SIGNAL_PEPTIDE_N_REGION (PHOBIUS); SIGNAL_PEPTIDE_H_REGION (PHOBIUS); NON_CYTOPLASMIC_DOMAIN (PHOBIUS); SIGNAL_PEPTIDE (PHOBIUS); SIGNAL_PEPTIDE_C_REGION (PHOBIUS); SignalP-noTM (SIGNALP_GRAM_NEGATIVE); SignalP-noTM (SIGNALP_EUK); SignalP-TM (SIGNALP_GRAM_POSITIVE)
Aqu2.1.33596_001	coiled-coil domain-containing protein 47-like	460	20	0	0.592	7	P:GO:0009790; P:GO:0055074; F:GO:0005515; F:GO:0005509; P:GO:0009791; P:GO:0006983; C:GO:0005783	-	Coil (COILS); Coil (COILS); IPR012879 (PFAM); IPR012879 (PANTHER); SIGNAL_PEPTIDE_N_REGION (PHOBIUS); SIGNAL_PEPTIDE_C_REGION (PHOBIUS); SIGNAL_PEPTIDE (PHOBIUS); NON_CYTOPLASMIC_DOMAIN (PHOBIUS); SIGNAL_PEPTIDE_H_REGION (PHOBIUS); SignalP-noTM (SIGNALP_GRAM_NEGATIVE); SignalP-TM (SIGNALP_GRAM_POSITIVE); SignalP-noTM (SIGNALP_EUK)
Aqu2.1.33609_001	---NA---	43	0			0	-		no IPS match
Aqu2.1.33666_001	deoxynucleotidyltransferase terminal-interacting protein 1	595	20	6.63312e-16	0.4725	0	-		IPR026064 (PANTHER)
Aqu2.1.33696_001	uncharacterized protein loc103032652	362	20	1.6113e-81	0.5485	5	F:GO:0046872; F:GO:0008270; F:GO:0003676; P:GO:0008150; C:GO:0005575		no IPS match
Aqu2.1.33724_001	wd40 repeat-containing protein	402	20	0	0.5265	1	F:GO:0005515		IPR001680 (SMART); IPR015943 (G3DSA:2.130.10.GENE3D); IPR001680 (PFAM); PTHR22847 (PANTHER); IPR001680 (PROSITE_PROFILES); IPR017986 (PROSITE_PROFILES); IPR001680 (PROSITE_PROFILES); IPR017986 (SUPERFAMILY)
Aqu2.1.33727_001	ets translocation variant 5-like isoform x2	1051	20	2.36399e-12	0.55	5	F:GO:0043565; P:GO:0035108; P:GO:0048793; F:GO:0003700; P:GO:0006355	-	IPR000418 (SMART); PF13289 (PFAM); IPR011991 (G3DSA:1.10.10.GENE3D); IPR000418 (PFAM); IPR000418 (PROSITE_PROFILES); SSF46785 (SUPERFAMILY)
Aqu2.1.33729_001	protein c-ets-2-b	968	20	0	0.7215	3	P:GO:0006355; F:GO:0043565; F:GO:0003700	-	Coil (COILS); IPR000418 (PRINTS); IPR000418 (SMART); IPR000418 (PFAM); IPR011991 (G3DSA:1.10.10.GENE3D); PTHR11849 (PANTHER); IPR000418 (PROSITE_PATTERNS); IPR000418 (PROSITE_PATTERNS); IPR000418 (PROSITE_PROFILES); SSF46785 (SUPERFAMILY)
Aqu2.1.33762_001	hemicentin-1	2763	20	1.38169e-124	0.4565	1	F:GO:0005515		Coil (COILS); Coil (COILS); Coil (COILS); IPR003598 (SMART); IPR003599 (SMART); IPR003961 (SMART); IPR003596 (SMART); IPR013783 (G3DSA:2.60.40.GENE3D); IPR013783 (G3DSA:2.60.40.GENE3D); IPR003961 (PFAM); IPR013783 (G3DSA:2.60.40.GENE3D); IPR013783 (G3DSA:2.60.40.GENE3D); PF13895 (PFAM); IPR013783 (G3DSA:2.60.40.GENE3D); IPR013783 (G3DSA:2.60.40.GENE3D); IPR013783 (G3DSA:2.60.40.GENE3D); IPR013783…
Aqu2.1.33763_001	transcription initiation factor tfiid subunit 7-like	307	20	3.76184e-49	0.5875	7	F:GO:0005515; P:GO:0044699; P:GO:0010605; P:GO:0006355; P:GO:0031324; P:GO:0006367; C:GO:0005669	-	Coil (COILS); IPR006751 (PFAM); PTHR12228 (PANTHER)
Aqu2.1.33769_001	rho termination factor-like protein	2034	17	0	0.507059	2	F:GO:0008270; F:GO:0005515		Coil (COILS); Coil (COILS); Coil (COILS); Coil (COILS); IPR001841 (SMART); IPR001841 (PFAM); IPR013083 (G3DSA:3.30.40.GENE3D); IPR011990 (G3DSA:1.25.40.GENE3D); PTHR12477 (PANTHER); IPR001841 (PROSITE_PROFILES); SSF57850 (SUPERFAMILY); SSF48452 (SUPERFAMILY)
Aqu2.1.33939_001	mitogen-activated protein kinase 14b-like isoform x1	364	20	0	0.7415	6	F:GO:0004707; P:GO:0000165; P:GO:0006468; F:GO:0005524; P:GO:0007178; P:GO:0009069	EC:2.7.11.24	IPR002290 (SMART); G3DSA:1.10.510.10 (GENE3D); G3DSA:3.30.200.20 (GENE3D); IPR000719 (PFAM); PTHR24055 (PANTHER); IPR003527 (PROSITE_PATTERNS); IPR000719 (PROSITE_PROFILES); IPR011009 (SUPERFAMILY)
Aqu2.1.33952_001	nuclear segregation protein bfr1	526	20	3.06639e-26	0.4405	0	-		Coil (COILS); Coil (COILS); Coil (COILS); Coil (COILS); PTHR31027 (PANTHER); PTHR31027:SF1 (PANTHER); SIGNAL_PEPTIDE_C_REGION (PHOBIUS); NON_CYTOPLASMIC_DOMAIN (PHOBIUS); SIGNAL_PEPTIDE (PHOBIUS); SIGNAL_PEPTIDE_N_REGION (PHOBIUS); SIGNAL_PEPTIDE_H_REGION (PHOBIUS)
Aqu2.1.34079_001	PREDICTED: hypothetical protein LOC100639296 [Amphimedon queenslandica]	263	20	2.61679e-101	0.6125	0	-		no IPS match
Aqu2.1.34186_001	nucleolar matrix family protein	328	20	1.96503e-39	0.5475	0	-		Coil (COILS); Coil (COILS); Coil (COILS); IPR007019 (PFAM); PF15459 (PFAM); IPR007019 (PANTHER); PTHR14369:SF0 (PANTHER)
Aqu2.1.34201_001	roquin-1-like isoform x2	978	20	0	0.6525	2	F:GO:0008270; F:GO:0005515		Coil (COILS); IPR001841 (SMART); IPR000571 (G3DSA:4.10.1000.GENE3D); IPR000571 (PFAM); IPR001841 (PFAM); IPR013083 (G3DSA:3.30.40.GENE3D); PTHR13139 (PANTHER); PTHR13139:SF5 (PANTHER); IPR017907 (PROSITE_PATTERNS); IPR001841 (PROSITE_PROFILES); IPR000571 (PROSITE_PROFILES); SSF90229 (SUPERFAMILY); SSF57850 (SUPERFAMILY)
Aqu2.1.34206_001	probable xaa-pro aminopeptidase 3-like	219	20	3.46494e-158	0.6945	5	F:GO:0008235; F:GO:0004177; P:GO:0007369; P:GO:0009987; P:GO:0006508	EC:3.4.11.0	IPR001714 (PRINTS); IPR000994 (PFAM); IPR000994 (G3DSA:3.90.230.GENE3D); PTHR10804 (PANTHER); PTHR10804:SF8 (PANTHER); IPR000994 (SUPERFAMILY)
Aqu2.1.34231_001	small rna 2 -o-methyltransferase-like	53	2	2.40704e-26	0.945	4	F:GO:0008173; P:GO:0001510; F:GO:0008171; P:GO:0006396	-	no IPS match
Aqu2.1.34303_001	metabotropic glutamate receptor 8-like	1010	20	0	0.6475	8	P:GO:0007186; C:GO:0097458; C:GO:0097060; F:GO:0004930; C:GO:0016021; F:GO:0008066; P:GO:0007268; P:GO:0019233	-	IPR000337 (PRINTS); G3DSA:3.40.50.2300 (GENE3D); IPR001828 (PFAM); G3DSA:3.40.50.2300 (GENE3D); G3DSA:3.40.50.2300 (GENE3D); PTHR24060 (PANTHER); SIGNAL_PEPTIDE_N_REGION (PHOBIUS); NON_CYTOPLASMIC_DOMAIN (PHOBIUS); SIGNAL_PEPTIDE (PHOBIUS); TRANSMEMBRANE (PHOBIUS); SIGNAL_PEPTIDE_C_REGION (PHOBIUS); CYTOPLASMIC_DOMAIN (PHOBIUS); SIGNAL_PEPTIDE_H_REGION (PHOBIUS); SignalP-noTM (SIGNALP_EUK); IPR02…
Aqu2.1.34450_001	nuclear factor of activated t-cells 5-like	575	20	1.90108e-07	0.418	3	C:GO:0005634; F:GO:0003700; P:GO:0006355		IPR013783 (G3DSA:2.60.40.GENE3D); IPR011539 (G3DSA:2.60.40.GENE3D); IPR008967 (SUPERFAMILY)
Aqu2.1.34470_001	sh3 domain-containing protein 19 isoform x5	1264	20	0	0.5045	1	F:GO:0005515		PR01217 (PRINTS); IPR001452 (PRINTS); IPR001452 (SMART); PF14604 (PFAM); IPR011511 (PFAM); G3DSA:2.30.30.40 (GENE3D); IPR001452 (PFAM); IPR028505 (PTHR10661:PANTHER); PTHR10661 (PANTHER); IPR001452 (PROSITE_PROFILES); IPR001452 (SUPERFAMILY)
Aqu2.1.34485_001	dolichyl-diphosphooligosaccharide--protein glycosyltransferase subunit 4	53	20	2.56644e-12	0.9085	3	C:GO:0016021; C:GO:0005789; F:GO:0016740	-	IPR018943 (PFAM); TRANSMEMBRANE (PHOBIUS); NON_CYTOPLASMIC_DOMAIN (PHOBIUS); CYTOPLASMIC_DOMAIN (PHOBIUS); IPR018943 (SUPERFAMILY); TMhelix (TMHMM)
Aqu2.1.34613_001	HIF1A	684	20	5.69519e-43	0.4945	4	F:GO:0004871; P:GO:0007165; P:GO:0006355; F:GO:0046983	-	IPR000014 (SMART); G3DSA:3.30.450.20 (GENE3D); PF14598 (PFAM); G3DSA:3.30.450.20 (GENE3D); IPR013767 (PFAM); PTHR23043 (PANTHER); PTHR23043:SF10 (PANTHER); IPR011598 (PROSITE_PROFILES); IPR000014 (PROSITE_PROFILES); IPR011598 (SUPERFAMILY); IPR000014 (SUPERFAMILY); IPR000014 (SUPERFAMILY)
Aqu2.1.34790_001	methyltransferase type 12	291	20	0	0.6555	3	F:GO:0008168; F:GO:0016740; P:GO:0032259		PF12847 (PFAM); IPR027625 (TIGRFAM); G3DSA:3.40.50.150 (GENE3D); PTHR10108:SF354 (PANTHER); PTHR10108 (PANTHER); CYTOPLASMIC_DOMAIN (PHOBIUS); NON_CYTOPLASMIC_DOMAIN (PHOBIUS); TRANSMEMBRANE (PHOBIUS); SSF53335 (SUPERFAMILY); TMhelix (TMHMM)
Aqu2.1.34791_001	protein unc-93 homolog a-like	438	20	2.26984e-52	0.4935	3	C:GO:0005886; C:GO:0016021; C:GO:0016020		IPR010291 (PFAM); G3DSA:1.20.1250.20 (GENE3D); PTHR19444 (PANTHER); CYTOPLASMIC_DOMAIN (PHOBIUS); TRANSMEMBRANE (PHOBIUS); NON_CYTOPLASMIC_DOMAIN (PHOBIUS); TRANSMEMBRANE (PHOBIUS); TRANSMEMBRANE (PHOBIUS); TRANSMEMBRANE (PHOBIUS); TRANSMEMBRANE (PHOBIUS); TRANSMEMBRANE (PHOBIUS); TRANSMEMBRANE (PHOBIUS); TRANSMEMBRANE (PHOBIUS); TRANSMEMBRANE (PHOBIUS); CYTOPLASMIC_DOMAIN (PHOBIUS); CYTOPLASMIC_…
Aqu2.1.34845_001	e3 ubiquitin-protein ligase trim71-like	781	20	0	0.5615	7	P:GO:0044763; F:GO:0008270; C:GO:0005622; P:GO:0009790; P:GO:0050794; P:GO:0043170; F:GO:0005515	-	Coil (COILS); IPR001298 (SMART); IPR000315 (SMART); IPR000315 (G3DSA:4.10.45.GENE3D); IPR013783 (G3DSA:2.60.40.GENE3D); IPR001258 (PFAM); IPR000315 (PFAM); IPR017868 (PFAM); IPR011042 (G3DSA:2.120.10.GENE3D); PTHR24103:SF208 (PANTHER); PTHR24103 (PANTHER); IPR017868 (PROSITE_PROFILES); IPR000315 (PROSITE_PROFILES); IPR013017 (PROSITE_PROFILES); SSF57845 (SUPERFAMILY); SSF101898 (SUPERFAMILY); IPR…
Aqu2.1.34853_001	---NA---	51	0			0	-		no IPS match
Aqu2.1.34854_001	dynein heavy chain axonemal	4627	20	0	0.786	7	F:GO:0003777; C:GO:0030286; P:GO:0006200; F:GO:0005524; P:GO:0007018; F:GO:0016887; C:GO:0005874	EC:3.6.1.3	Coil (COILS); Coil (COILS); Coil (COILS); Coil (COILS); Coil (COILS); Coil (COILS); Coil (COILS); Coil (COILS); IPR003593 (SMART); G3DSA:3.40.50.300 (GENE3D); IPR024743 (PFAM); PF12775 (PFAM); IPR024317 (PFAM); IPR004273 (PFAM); PF12781 (PFAM); PF12774 (PFAM); IPR013594 (PFAM); IPR011704 (PFAM); IPR013602 (PFAM); IPR026983 (PANTHER); PTHR10676:SF35 (PANTHER); IPR027417 (SUPERFAMILY); IPR027417 (S…
Aqu2.1.34928_001	e3 ubiquitin-protein ligase trim71-like	1660	20	2.98798e-81	0.4625	7	P:GO:0044763; P:GO:0007275; P:GO:0050789; P:GO:0043170; F:GO:0008270; F:GO:0005515; C:GO:0005622	-	Coil (COILS); IPR000483 (SMART); IPR001841 (SMART); IPR003598 (SMART); IPR000372 (SMART); IPR003591 (SMART); IPR000315 (SMART); SM00365 (SMART); IPR003599 (SMART); IPR013098 (PFAM); IPR001611 (PFAM); IPR013783 (G3DSA:2.60.40.GENE3D); PF13855 (PFAM); IPR013106 (PFAM); IPR011042 (G3DSA:2.120.10.GENE3D); IPR013783 (G3DSA:2.60.40.GENE3D); IPR001258 (PFAM); IPR018957 (PFAM); IPR013783 (G3DSA:2.60.40.G…
Aqu2.1.35038_001	SOX2	437	20	0	0.756	8	P:GO:0040035; P:GO:0009792; P:GO:0010171; P:GO:0002119; P:GO:0018991; P:GO:0040010; P:GO:0040011; P:GO:0002009	-	PR00886 (PRINTS); IPR009071 (SMART); IPR009071 (PFAM); IPR009071 (G3DSA:1.10.30.GENE3D); PTHR10270:SF160 (PANTHER); PTHR10270 (PANTHER); IPR009071 (PROSITE_PROFILES); IPR009071 (SUPERFAMILY)
Aqu2.1.35039_001	rho gtpase activation protein	843	20	0	0.5805	3	P:GO:0051056; C:GO:0005622; F:GO:0005099	-	Coil (COILS); Coil (COILS); IPR001936 (SMART); IPR000593 (PFAM); IPR001936 (PFAM); IPR001936 (G3DSA:1.10.506.GENE3D); PTHR14149:SF5 (PANTHER); PTHR14149 (PANTHER); IPR001936 (PROSITE_PROFILES); IPR008936 (SUPERFAMILY); SSF143885 (SUPERFAMILY)
Aqu2.1.35048_001	nad mitochondrial	1071	20	0	0.812	9	F:GO:0008750; C:GO:0005743; F:GO:0050661; P:GO:0015992; C:GO:0016021; P:GO:0072593; P:GO:0055114; P:GO:0006769; P:GO:0046497	EC:1.6.1.2	IPR007698 (SMART); IPR007886 (SMART); IPR007886 (PFAM); IPR012136 (PFAM); G3DSA:3.40.50.1220 (GENE3D); IPR016040 (G3DSA:3.40.50.GENE3D); IPR024605 (PFAM); IPR007698 (PFAM); G3DSA:3.40.50.1770 (GENE3D); IPR026255 (TIGRFAM); PTHR10160:SF14 (PANTHER); PTHR10160 (PANTHER); IPR008142 (PROSITE_PATTERNS); IPR008143 (PROSITE_PATTERNS); CYTOPLASMIC_DOMAIN (PHOBIUS); CYTOPLASMIC_DOMAIN (PHOBIUS); TRANSMEMB…
Aqu2.1.35054_001	---NA---	94	0			0	-		NON_CYTOPLASMIC_DOMAIN (PHOBIUS); TRANSMEMBRANE (PHOBIUS); CYTOPLASMIC_DOMAIN (PHOBIUS)
Aqu2.1.35119_001	filamin-c-like isoform x3	1143	20	1.75972e-105	0.4535	1	F:GO:0003779		IPR001298 (SMART); IPR001715 (SMART); IPR001715 (G3DSA:1.10.418.GENE3D); IPR013783 (G3DSA:2.60.40.GENE3D); IPR001715 (PFAM); IPR017868 (PFAM); PTHR11915 (PANTHER); PTHR11915:SF47 (PANTHER); IPR001589 (PROSITE_PATTERNS); IPR017868 (PROSITE_PROFILES); IPR001715 (PROSITE_PROFILES); IPR014756 (SUPERFAMILY); IPR001715 (SUPERFAMILY)
Aqu2.1.35122_001	bromodomain adjacent to zinc finger domain protein 2a isoform x3	2355	20	0	0.5355	10	F:GO:0005515; F:GO:0008270; P:GO:0016575; P:GO:0006259; P:GO:0006342; C:GO:0044428; F:GO:0003677; P:GO:0006338; C:GO:0043232; P:GO:0034968	-	Coil (COILS); Coil (COILS); Coil (COILS); Coil (COILS); Coil (COILS); IPR001487 (PRINTS); IPR001965 (SMART); IPR001487 (SMART); IPR001739 (SMART); IPR001487 (PFAM); IPR019787 (PFAM); IPR001487 (G3DSA:1.20.920.GENE3D); IPR001739 (G3DSA:3.30.890.GENE3D); IPR001739 (PFAM); IPR013083 (G3DSA:3.30.40.GENE3D); PTHR22880 (PANTHER); PTHR22880:SF2 (PANTHER); IPR018359 (PROSITE_PATTERNS); IPR001739 (PROSITE…
Aqu2.1.35123_001	cyclic amp receptor-like protein a-like	374	20	1.0977e-33	0.4685	3	F:GO:0004888; C:GO:0016020; P:GO:0007166		PTHR23112 (PANTHER); CYTOPLASMIC_DOMAIN (PHOBIUS); NON_CYTOPLASMIC_DOMAIN (PHOBIUS); CYTOPLASMIC_DOMAIN (PHOBIUS); NON_CYTOPLASMIC_DOMAIN (PHOBIUS); TRANSMEMBRANE (PHOBIUS); TRANSMEMBRANE (PHOBIUS); TRANSMEMBRANE (PHOBIUS); TRANSMEMBRANE (PHOBIUS); NON_CYTOPLASMIC_DOMAIN (PHOBIUS); TRANSMEMBRANE (PHOBIUS); NON_CYTOPLASMIC_DOMAIN (PHOBIUS); TRANSMEMBRANE (PHOBIUS); CYTOPLASMIC_DOMAIN (PHOBIUS); CY…
Aqu2.1.35140_001	ubr5 protein	2680	20	0	0.5705	12	P:GO:0000209; P:GO:0080090; P:GO:0090316; F:GO:0005515; P:GO:0010605; P:GO:0048583; C:GO:0044424; F:GO:0004842; P:GO:0007165; P:GO:0042306; P:GO:0031324; P:GO:0006281	EC:6.3.2.19	Coil (COILS); IPR000569 (SMART); G3DSA:3.30.2160.10 (GENE3D); IPR000569 (PFAM); IPR009091 (G3DSA:2.130.10.GENE3D); PTHR11254 (PANTHER); PTHR11254:SF77 (PANTHER); IPR000569 (PROSITE_PROFILES); IPR000569 (SUPERFAMILY); IPR009091 (SUPERFAMILY)
Aqu2.1.35208_001	interferon regulatory factor 2-binding protein 1	524	20	0	0.479	8	F:GO:0046872; P:GO:0006355; P:GO:0000122; F:GO:0016874; P:GO:0006351; F:GO:0003714; F:GO:0008134; C:GO:0005634		IPR022750 (PFAM); PTHR31237 (PANTHER); PTHR31237:SF0 (PANTHER); SSF57850 (SUPERFAMILY)
Aqu2.1.35276_001	heat repeat-containing protein 5b isoform x2	1963	20	0	0.59	1	F:GO:0005488		IPR011989 (G3DSA:1.25.10.GENE3D); IPR011989 (G3DSA:1.25.10.GENE3D); PTHR21663 (PANTHER); IPR016024 (SUPERFAMILY); IPR016024 (SUPERFAMILY)
Aqu2.1.35282_001	mitogen-activated protein kinase kinase kinase 9- partial	488	1	1.07126e-59	1	7	P:GO:0018108; F:GO:0005524; F:GO:0004713; P:GO:0000186; F:GO:0004709; P:GO:0007178; P:GO:0009069	EC:2.7.10.0; EC:2.7.11.25	Coil (COILS)
Aqu2.1.35396_001	hypothetical protein LOTGIDRAFT_176545 [Lottia gigantea]	54	20	1.81773e-19	0.761	0	-		no IPS match
Aqu2.1.35559_001	folliculin-interacting protein 2 isoform x1	1527	20	0	0.535	5	P:GO:0001934; P:GO:0051716; P:GO:0007154; P:GO:0048523; C:GO:0005634	-	IPR026156 (PRINTS); IPR028086 (PFAM); IPR028084 (PFAM); IPR028085 (PFAM); PTHR21634:SF9 (PANTHER); IPR026156 (PANTHER); NON_CYTOPLASMIC_DOMAIN (PHOBIUS); CYTOPLASMIC_DOMAIN (PHOBIUS); TRANSMEMBRANE (PHOBIUS)
Aqu2.1.35571_001	na(+) h(+) exchange regulatory cofactor nhe-rf2 isoform x1	180	20	1.29574e-22	0.627	7	P:GO:0006461; F:GO:0019902; F:GO:0008013; F:GO:0005102; F:GO:0008022; C:GO:0016342; P:GO:0007165	-	IPR001478 (SMART); IPR001478 (PFAM); G3DSA:2.30.42.10 (GENE3D); PTHR14191 (PANTHER); PTHR14191:SF0 (PANTHER); IPR001478 (PROSITE_PROFILES); IPR001478 (SUPERFAMILY)
Aqu2.1.35745_001	Dmel\da	615	20	0	0.753	10	P:GO:0006357; F:GO:0044212; P:GO:0007517; P:GO:0006955; P:GO:0048522; F:GO:0046983; F:GO:0003700; C:GO:0005634; C:GO:0005667; P:GO:0045449	-	Coil (COILS); IPR011598 (SMART); IPR011598 (PFAM); IPR011598 (G3DSA:4.10.280.GENE3D); PTHR11793 (PANTHER); IPR011598 (PROSITE_PROFILES); IPR011598 (SUPERFAMILY)
Aqu2.1.35958_001	tyrosine-protein kinase csk-like	454	20	0	0.652	4	F:GO:0004672; P:GO:0006468; F:GO:0005515; F:GO:0005524	-	IPR001245 (PRINTS); IPR000980 (PRINTS); IPR001452 (SMART); IPR000980 (SMART); IPR000980 (PFAM); G3DSA:1.10.510.10 (GENE3D); IPR001452 (PFAM); G3DSA:3.30.200.20 (GENE3D); IPR000980 (G3DSA:3.30.505.GENE3D); IPR001245 (PFAM); G3DSA:2.30.30.40 (GENE3D); PTHR24418 (PANTHER); IPR017441 (PROSITE_PATTERNS); IPR000980 (PROSITE_PROFILES); IPR001452 (PROSITE_PROFILES); IPR000719 (PROSITE_PROFILES); IPR00145…
Aqu2.1.35962_001	macrophage-expressed gene 1 protein	757	20	0	0.589	0	-		IPR020864 (PFAM); PTHR31463 (PANTHER); SIGNAL_PEPTIDE_C_REGION (PHOBIUS); SIGNAL_PEPTIDE_N_REGION (PHOBIUS); NON_CYTOPLASMIC_DOMAIN (PHOBIUS); TRANSMEMBRANE (PHOBIUS); SIGNAL_PEPTIDE_H_REGION (PHOBIUS); CYTOPLASMIC_DOMAIN (PHOBIUS); SIGNAL_PEPTIDE (PHOBIUS); IPR020864 (PROSITE_PROFILES); SignalP-noTM (SIGNALP_EUK); TMhelix (TMHMM)
Aqu2.1.35965_001	nhl repeat containing protein	634	20	1.31738e-72	0.5705	2	F:GO:0008270; F:GO:0005515		Coil (COILS); IPR001841 (SMART); IPR013083 (G3DSA:3.30.40.GENE3D); IPR018957 (PFAM); IPR011042 (G3DSA:2.120.10.GENE3D); IPR001258 (PFAM); PTHR24103:SF208 (PANTHER); PTHR24103 (PANTHER); IPR017907 (PROSITE_PATTERNS); IPR001841 (PROSITE_PROFILES); IPR013017 (PROSITE_PROFILES); SSF57850 (SUPERFAMILY); SSF101898 (SUPERFAMILY)
Aqu2.1.35996_001	---NA---	844	0			0	-		no IPS match
Aqu2.1.36074_001	RFX2	703	20	0	0.7085	2	P:GO:0006355; F:GO:0003677		IPR011991 (G3DSA:1.10.10.GENE3D); IPR003150 (PFAM); PTHR12619 (PANTHER); IPR003150 (PROSITE_PROFILES); SSF46785 (SUPERFAMILY)
Aqu2.1.36092_001	zinc finger mym-type protein 3	151	20	7.38009e-25	0.5785	3	P:GO:0015074; P:GO:0006310; F:GO:0003677		IPR021893 (PFAM)
Aqu2.1.36094_001	tpa: zinc finger protein	183	20	2.26686e-38	0.5455	3	F:GO:0046872; F:GO:0008270; F:GO:0003676		SIGNAL_PEPTIDE_N_REGION (PHOBIUS); SIGNAL_PEPTIDE_H_REGION (PHOBIUS); SIGNAL_PEPTIDE_C_REGION (PHOBIUS); SIGNAL_PEPTIDE (PHOBIUS); NON_CYTOPLASMIC_DOMAIN (PHOBIUS); SignalP-TM (SIGNALP_GRAM_POSITIVE)
Aqu2.1.36117_001	isoform h	430	20	5.43051e-49	0.525	1	F:GO:0005515		IPR001849 (SMART); IPR001478 (SMART); G3DSA:2.30.42.10 (GENE3D); IPR001849 (PFAM); IPR011993 (G3DSA:2.30.29.GENE3D); IPR001478 (PFAM); PTHR23031 (PANTHER); PTHR23031:SF4 (PANTHER); IPR001478 (PROSITE_PROFILES); IPR001849 (PROSITE_PROFILES); IPR001478 (SUPERFAMILY); SSF50729 (SUPERFAMILY)
Aqu2.1.36145_001	dnaj homolog subfamily c member 27	181	20	7.89815e-116	0.786	6	F:GO:0005525; P:GO:0007264; P:GO:0006184; C:GO:0016020; C:GO:0005622; P:GO:0015031	-	IPR001806 (PRINTS); IPR020849 (SMART); IPR003578 (SMART); IPR003579 (SMART); G3DSA:3.40.50.300 (GENE3D); IPR005225 (TIGRFAM); IPR001806 (PFAM); PTHR24073:SF269 (PANTHER); PTHR24073 (PANTHER); PS51419 (PROSITE_PROFILES); IPR027417 (SUPERFAMILY)
Aqu2.1.36257_001	dystrobrevin- isoform a	647	20	4.13346e-31	0.452	2	F:GO:0008270; F:GO:0005509		Coil (COILS); IPR000433 (SMART); IPR015153 (PFAM); IPR011992 (G3DSA:1.10.238.GENE3D); IPR000433 (PFAM); PTHR11915:SF66 (PANTHER); PTHR11915 (PANTHER); IPR000433 (PROSITE_PATTERNS); IPR000433 (PROSITE_PROFILES); SSF47473 (SUPERFAMILY); SSF57850 (SUPERFAMILY)
Aqu2.1.36277_001	transmembrane protein 131 isoform x1	2123	20	0	0.54	5	F:GO:0003674; C:GO:0016021; C:GO:0016020; P:GO:0008150; C:GO:0005575		IPR022113 (PFAM); PTHR22050 (PANTHER); PTHR22050:SF0 (PANTHER); NON_CYTOPLASMIC_DOMAIN (PHOBIUS); SIGNAL_PEPTIDE_N_REGION (PHOBIUS); CYTOPLASMIC_DOMAIN (PHOBIUS); TRANSMEMBRANE (PHOBIUS); SIGNAL_PEPTIDE (PHOBIUS); NON_CYTOPLASMIC_DOMAIN (PHOBIUS); SIGNAL_PEPTIDE_C_REGION (PHOBIUS); SIGNAL_PEPTIDE_H_REGION (PHOBIUS); TRANSMEMBRANE (PHOBIUS); SignalP-noTM (SIGNALP_EUK)
Aqu2.1.36287_001	wash complex subunit strumpellin	1155	20	0	0.7795	3	C:GO:0071203; P:GO:0016197; C:GO:0005768	-	IPR019393 (PFAM); PTHR15691:SF6 (PANTHER); IPR019393 (PANTHER)
Aqu2.1.36290_001	chrd domain containing protein	861	20	1.91201e-43	0.506	2	F:GO:0005507; F:GO:0009055		IPR010895 (SMART); IPR008972 (G3DSA:2.60.40.GENE3D); IPR010895 (PFAM); TRANSMEMBRANE (PHOBIUS); SIGNAL_PEPTIDE_H_REGION (PHOBIUS); CYTOPLASMIC_DOMAIN (PHOBIUS); SIGNAL_PEPTIDE_N_REGION (PHOBIUS); NON_CYTOPLASMIC_DOMAIN (PHOBIUS); SIGNAL_PEPTIDE_C_REGION (PHOBIUS); SIGNAL_PEPTIDE (PHOBIUS); IPR010895 (PROSITE_PROFILES); IPR003245 (PROSITE_PROFILES); IPR010895 (PROSITE_PROFILES); SignalP-noTM (SIGN…
Aqu2.1.36374_001	integrase core domain protein	673	20	0	0.5825	3	F:GO:0003964; P:GO:0006278; F:GO:0003723	EC:2.7.7.49	Coil (COILS); IPR000477 (PFAM); IPR008042 (PFAM); G3DSA:3.30.70.270 (GENE3D); PTHR22955 (PANTHER); SSF56672 (SUPERFAMILY)
Aqu2.1.36416_001	extracellular protease	372	20	2.28579e-57	0.488	1	F:GO:0008237		PF14521 (PFAM); IPR024079 (G3DSA:3.40.390.GENE3D); CYTOPLASMIC_DOMAIN (PHOBIUS); NON_CYTOPLASMIC_DOMAIN (PHOBIUS); TRANSMEMBRANE (PHOBIUS); SSF55486 (SUPERFAMILY); TMhelix (TMHMM)
Aqu2.1.36486_001	solute carrier family 15 member 4-like	552	20	2.12887e-41	0.4125	8	C:GO:0016020; P:GO:0006810; F:GO:0005215; P:GO:0006857; F:GO:0015293; C:GO:0016021; P:GO:0015833; P:GO:0015031		CYTOPLASMIC_DOMAIN (PHOBIUS); TRANSMEMBRANE (PHOBIUS); TRANSMEMBRANE (PHOBIUS); CYTOPLASMIC_DOMAIN (PHOBIUS); TRANSMEMBRANE (PHOBIUS); NON_CYTOPLASMIC_DOMAIN (PHOBIUS); TRANSMEMBRANE (PHOBIUS); TRANSMEMBRANE (PHOBIUS); TRANSMEMBRANE (PHOBIUS); NON_CYTOPLASMIC_DOMAIN (PHOBIUS); TRANSMEMBRANE (PHOBIUS); CYTOPLASMIC_DOMAIN (PHOBIUS); NON_CYTOPLASMIC_DOMAIN (PHOBIUS); TRANSMEMBRANE (PHOBIUS); NON_CYT…
Aqu2.1.36546_001	phosphatidylserine decarboxylase proenzyme-like	477	20	0	0.622	6	F:GO:0004609; P:GO:0008654; P:GO:0006544; P:GO:0006563; P:GO:0006566; P:GO:0046486	EC:4.1.1.65	IPR005221 (TIGRFAM); IPR003817 (PFAM); IPR005221 (PANTHER); PTHR10067:SF0 (PANTHER); NON_CYTOPLASMIC_DOMAIN (PHOBIUS); TRANSMEMBRANE (PHOBIUS); TRANSMEMBRANE (PHOBIUS); CYTOPLASMIC_DOMAIN (PHOBIUS); NON_CYTOPLASMIC_DOMAIN (PHOBIUS); TMhelix (TMHMM)
Aqu2.1.36604_001	coatomer subunit beta	958	20	0	0.8005	5	P:GO:0016192; P:GO:0006886; C:GO:0030126; F:GO:0005198; F:GO:0005488	-	IPR016460 (PIRSF); IPR002553 (PFAM); PF14806 (PFAM); IPR011989 (G3DSA:1.25.10.GENE3D); IPR011710 (PFAM); IPR016460 (PANTHER); NON_CYTOPLASMIC_DOMAIN (PHOBIUS); TRANSMEMBRANE (PHOBIUS); TRANSMEMBRANE (PHOBIUS); NON_CYTOPLASMIC_DOMAIN (PHOBIUS); CYTOPLASMIC_DOMAIN (PHOBIUS); IPR016024 (SUPERFAMILY)
Aqu2.1.36677_001	hepatocyte growth factor receptor-like	556	20	0	0.6135	3	F:GO:0005261; P:GO:0015672; C:GO:0016020		PR00453 (PRINTS); IPR002035 (SMART); IPR002035 (G3DSA:3.40.50.GENE3D); IPR007866 (PFAM); IPR002035 (PFAM); PTHR22992 (PANTHER); IPR002035 (PROSITE_PROFILES); SSF53300 (SUPERFAMILY)
Aqu2.1.36692_001	trimeric intracellular cation channel type a-like	116	1	1.45828e-78	1	0	-		no IPS match
Aqu2.1.36705_001	---NA---	325	0			1	F:GO:0005515		IPR003892 (PFAM); IPR003892 (PROSITE_PROFILES); IPR009060 (SUPERFAMILY)
Aqu2.1.36708_001	atrial natriuretic peptide receptor 1-like	877	20	0	0.668	9	P:GO:0006468; P:GO:0035556; F:GO:0004383; F:GO:0004672; C:GO:0016021; F:GO:0005524; P:GO:0006182; P:GO:0006144; P:GO:0046039	EC:4.6.1.2	IPR001245 (PRINTS); IPR001054 (SMART); G3DSA:3.30.200.20 (GENE3D); IPR001054 (G3DSA:3.30.70.GENE3D); IPR001054 (PFAM); G3DSA:1.10.510.10 (GENE3D); IPR001245 (PFAM); PTHR11920 (PANTHER); PTHR11920:SF85 (PANTHER); IPR018297 (PROSITE_PATTERNS); CYTOPLASMIC_DOMAIN (PHOBIUS); TRANSMEMBRANE (PHOBIUS); SIGNAL_PEPTIDE (PHOBIUS); SIGNAL_PEPTIDE_H_REGION (PHOBIUS); SIGNAL_PEPTIDE_N_REGION (PHOBIUS); SIGNAL…
Aqu2.1.37089_001	ankyrin repeat protein	1861	20	0	0.502	5	F:GO:0008083; C:GO:0005576; P:GO:0007165; P:GO:0008283; P:GO:0040007	-	Coil (COILS); IPR002110 (SMART); IPR020683 (G3DSA:1.25.40.GENE3D); IPR020683 (G3DSA:1.25.40.GENE3D); IPR020683 (G3DSA:1.25.40.GENE3D); IPR020683 (PFAM); IPR002110 (PFAM); PTHR24182 (PANTHER); PTHR24182:SF1 (PANTHER); IPR002110 (PROSITE_PROFILES); IPR002110 (PROSITE_PROFILES); IPR002110 (PROSITE_PROFILES); IPR002110 (PROSITE_PROFILES); IPR020683 (PROSITE_PROFILES); IPR002110 (PROSITE_PROFILES); IP…
Aqu2.1.37090_001	PREDICTED: hypothetical protein LOC100639828 [Amphimedon queenslandica]	145	4	2.49888e-22	0.595	1	C:GO:0016021		G3DSA:1.20.1070.10 (GENE3D); CYTOPLASMIC_DOMAIN (PHOBIUS); NON_CYTOPLASMIC_DOMAIN (PHOBIUS); TRANSMEMBRANE (PHOBIUS); CYTOPLASMIC_DOMAIN (PHOBIUS); TRANSMEMBRANE (PHOBIUS); TRANSMEMBRANE (PHOBIUS); NON_CYTOPLASMIC_DOMAIN (PHOBIUS); IPR017452 (PROSITE_PROFILES); SSF81321 (SUPERFAMILY); TMhelix (TMHMM); TMhelix (TMHMM); TMhelix (TMHMM)
Aqu2.1.37106_001	85 88 kda calcium-independent phospholipase a2 isoform x2	798	20	9.04688e-71	0.4835	5	P:GO:0044763; P:GO:0048522; P:GO:0050896; F:GO:0005515; P:GO:0006629	-	IPR002110 (SMART); IPR020683 (PFAM); IPR020683 (G3DSA:1.25.40.GENE3D); G3DSA:3.40.1090.10 (GENE3D); IPR002641 (PFAM); PTHR24139 (PANTHER); PTHR24139:SF0 (PANTHER); IPR020683 (PROSITE_PROFILES); IPR002110 (PROSITE_PROFILES); IPR016035 (SUPERFAMILY); IPR020683 (SUPERFAMILY)
Aqu2.1.37163_001	g-protein coupled receptor 126-like	1633	20	0	0.4805	4	P:GO:0007218; C:GO:0016021; F:GO:0004930; F:GO:0005515	-	IPR003599 (SMART); IPR003598 (SMART); IPR000203 (SMART); IPR000832 (PFAM); IPR013783 (G3DSA:2.60.40.GENE3D); IPR013783 (G3DSA:2.60.40.GENE3D); IPR000203 (PFAM); IPR000742 (PFAM); IPR013098 (PFAM); G3DSA:2.10.25.10 (GENE3D); PF13895 (PFAM); IPR013783 (G3DSA:2.60.40.GENE3D); IPR013783 (G3DSA:2.60.40.GENE3D); IPR013783 (G3DSA:2.60.40.GENE3D); PTHR12011 (PANTHER); IPR013032 (PROSITE_PATTERNS); TRANSM…
Aqu2.1.37298_001	polyprenol reductase	245	20	2.00489e-31	0.5105	4	C:GO:0005737; C:GO:0016021; P:GO:0006629; F:GO:0016627		IPR001104 (PFAM); PTHR14624 (PANTHER); TRANSMEMBRANE (PHOBIUS); TRANSMEMBRANE (PHOBIUS); CYTOPLASMIC_DOMAIN (PHOBIUS); NON_CYTOPLASMIC_DOMAIN (PHOBIUS); NON_CYTOPLASMIC_DOMAIN (PHOBIUS); TRANSMEMBRANE (PHOBIUS); CYTOPLASMIC_DOMAIN (PHOBIUS); NON_CYTOPLASMIC_DOMAIN (PHOBIUS); CYTOPLASMIC_DOMAIN (PHOBIUS); TRANSMEMBRANE (PHOBIUS); TRANSMEMBRANE (PHOBIUS); IPR001104 (PROSITE_PROFILES); TMhelix (TMHM…
Aqu2.1.37422_001	nck-interacting protein with sh3 domain	810	20	0	0.652	1	F:GO:0005515		Coil (COILS); IPR001452 (SMART); PF14604 (PFAM); IPR018556 (PFAM); IPR001452 (PFAM); G3DSA:2.30.30.40 (GENE3D); PTHR13357 (PANTHER); IPR001452 (PROSITE_PROFILES); IPR001452 (SUPERFAMILY); IPR016024 (SUPERFAMILY)
Aqu2.1.37424_001	pseudouridylate synthase 7 homolog	614	20	0	0.646	3	P:GO:0001522; F:GO:0009982; F:GO:0003723		IPR017091 (PIRSF); IPR001656 (PFAM); IPR001656 (TIGRFAM); IPR001656 (PANTHER); IPR020119 (PROSITE_PATTERNS); IPR011760 (PROSITE_PROFILES); IPR020103 (SUPERFAMILY)
Aqu2.1.37427_001	serine threonine-protein kinase wnk3	1703	20	0	0.716	15	P:GO:0007243; P:GO:0032414; P:GO:0043270; P:GO:0090188; C:GO:0005737; P:GO:0003084; P:GO:0006468; P:GO:2000680; F:GO:0004674; F:GO:0019902; C:GO:0030054; P:GO:0010923; P:GO:0002028; F:GO:0005524; P:GO:0009069	EC:2.7.11.0	Coil (COILS); Coil (COILS); IPR002290 (SMART); IPR000719 (PFAM); G3DSA:3.30.200.20 (GENE3D); G3DSA:3.10.20.90 (GENE3D); G3DSA:1.10.510.10 (GENE3D); PTHR13902 (PANTHER); PTHR13902:SF13 (PANTHER); IPR008271 (PROSITE_PATTERNS); IPR000719 (PROSITE_PROFILES); IPR011009 (SUPERFAMILY)
Aqu2.1.37454_001	hemk methyltransferase family member 1-like	308	20	0	0.586	3	F:GO:0003676; P:GO:0006479; F:GO:0008276	-	IPR019874 (TIGRFAM); G3DSA:3.40.50.150 (GENE3D); G3DSA:1.10.8.10 (GENE3D); IPR007848 (PFAM); IPR004556 (TIGRFAM); PTHR18895:SF7 (PANTHER); PTHR18895 (PANTHER); IPR002052 (PROSITE_PATTERNS); SSF53335 (SUPERFAMILY)
Aqu2.1.37455_001	nuak family snf1-like kinase 1-like	387	20	0	0.643	4	P:GO:0006468; F:GO:0005524; F:GO:0004674; P:GO:0009069	EC:2.7.11.0	Coil (COILS); IPR002290 (SMART); IPR000719 (PFAM); G3DSA:3.30.200.20 (GENE3D); G3DSA:1.10.510.10 (GENE3D); PTHR24343 (PANTHER); IPR008271 (PROSITE_PATTERNS); IPR017441 (PROSITE_PATTERNS); IPR000719 (PROSITE_PROFILES); IPR011009 (SUPERFAMILY)
Aqu2.1.37481_001	sortilin isoform x2	777	20	0	0.489	10	P:GO:0007166; F:GO:0005515; C:GO:0016023; P:GO:0010033; C:GO:0005794; P:GO:0044765; C:GO:0044446; P:GO:0046907; P:GO:0032502; C:GO:0016021	-	IPR006581 (SMART); G3DSA:2.130.10.140 (GENE3D); PTHR12106 (PANTHER); NON_CYTOPLASMIC_DOMAIN (PHOBIUS); CYTOPLASMIC_DOMAIN (PHOBIUS); CYTOPLASMIC_DOMAIN (PHOBIUS); TRANSMEMBRANE (PHOBIUS); TRANSMEMBRANE (PHOBIUS); SignalP-noTM (SIGNALP_EUK); IPR011040 (SUPERFAMILY); TMhelix (TMHMM); TMhelix (TMHMM)
Aqu2.1.37502_001	prostacyclin receptor	313	20	3.00658e-53	0.4525	3	P:GO:0007186; F:GO:0004930; C:GO:0016021	-	IPR000276 (PRINTS); G3DSA:1.20.1070.10 (GENE3D); IPR000276 (PFAM); PTHR24249 (PANTHER); NON_CYTOPLASMIC_DOMAIN (PHOBIUS); TRANSMEMBRANE (PHOBIUS); CYTOPLASMIC_DOMAIN (PHOBIUS); CYTOPLASMIC_DOMAIN (PHOBIUS); TRANSMEMBRANE (PHOBIUS); NON_CYTOPLASMIC_DOMAIN (PHOBIUS); NON_CYTOPLASMIC_DOMAIN (PHOBIUS); TRANSMEMBRANE (PHOBIUS); CYTOPLASMIC_DOMAIN (PHOBIUS); NON_CYTOPLASMIC_DOMAIN (PHOBIUS); TRANSMEMBR…
Aqu2.1.37548_001	zinc transporter zip12-like	447	20	0	0.5575	4	P:GO:0055085; F:GO:0046873; P:GO:0030001; C:GO:0016020	-	Coil (COILS); IPR003689 (PFAM); PTHR12191 (PANTHER); TRANSMEMBRANE (PHOBIUS); CYTOPLASMIC_DOMAIN (PHOBIUS); NON_CYTOPLASMIC_DOMAIN (PHOBIUS); SIGNAL_PEPTIDE_C_REGION (PHOBIUS); SIGNAL_PEPTIDE (PHOBIUS); TRANSMEMBRANE (PHOBIUS); TRANSMEMBRANE (PHOBIUS); TRANSMEMBRANE (PHOBIUS); CYTOPLASMIC_DOMAIN (PHOBIUS); TRANSMEMBRANE (PHOBIUS); SIGNAL_PEPTIDE_N_REGION (PHOBIUS); CYTOPLASMIC_DOMAIN (PHOBIUS); T…
Aqu2.1.37583_001	adapter molecule crk	228	16	1.99277e-166	0.57375	2	F:GO:0046872; F:GO:0005515	-	IPR001452 (PRINTS); IPR015880 (SMART); IPR001452 (SMART); G3DSA:2.30.30.40 (GENE3D); PF14604 (PFAM); PF12874 (PFAM); PTHR22820 (PANTHER); IPR007087 (PROSITE_PATTERNS); IPR007087 (PROSITE_PROFILES); IPR001452 (PROSITE_PROFILES); IPR001452 (SUPERFAMILY); SSF57667 (SUPERFAMILY)
Aqu2.1.37634_001	PREDICTED: hypothetical protein LOC100639283 [Amphimedon queenslandica]	487	2	3.42513e-12	0.395	0	-		NON_CYTOPLASMIC_DOMAIN (PHOBIUS); CYTOPLASMIC_DOMAIN (PHOBIUS); TRANSMEMBRANE (PHOBIUS)
Aqu2.1.37660_001	---NA---	89	0			0	-		CYTOPLASMIC_DOMAIN (PHOBIUS); TRANSMEMBRANE (PHOBIUS); CYTOPLASMIC_DOMAIN (PHOBIUS); NON_CYTOPLASMIC_DOMAIN (PHOBIUS); TRANSMEMBRANE (PHOBIUS); TMhelix (TMHMM); TMhelix (TMHMM)
Aqu2.1.37716_001	arylsulfatase	475	20	5.68314e-141	0.6205	2	P:GO:0008152; F:GO:0008484	-	PF14707 (PFAM); IPR017849 (G3DSA:3.40.720.GENE3D); G3DSA:3.30.1120.10 (GENE3D); IPR000917 (PFAM); PTHR10342:SF29 (PANTHER); PTHR10342 (PANTHER); IPR024607 (PROSITE_PATTERNS); IPR024607 (PROSITE_PATTERNS); SIGNAL_PEPTIDE_N_REGION (PHOBIUS); SIGNAL_PEPTIDE (PHOBIUS); NON_CYTOPLASMIC_DOMAIN (PHOBIUS); SIGNAL_PEPTIDE_H_REGION (PHOBIUS); SIGNAL_PEPTIDE_C_REGION (PHOBIUS); SignalP-noTM (SIGNALP_EUK); I…
Aqu2.1.37774_001	serine arginine-rich splicing factor 2	169	20	1.57392e-112	0.886	13	F:GO:0003723; P:GO:0006369; C:GO:0005681; P:GO:0000398; C:GO:0016607; P:GO:0031124; F:GO:0003714; C:GO:0016605; F:GO:0005515; F:GO:0000166; P:GO:0006406; C:GO:0005667; P:GO:0016481	-	IPR000504 (SMART); IPR000504 (PFAM); IPR012677 (G3DSA:3.30.70.GENE3D); PTHR23147 (PANTHER); IPR000504 (PROSITE_PROFILES); SSF54928 (SUPERFAMILY)
Aqu2.1.37812_001	rgm domain family member b	523	20	1.80386e-09	0.466	4	P:GO:0044763; P:GO:0050794; C:GO:0044464; C:GO:0016020	-	IPR009496 (PFAM); IPR010536 (PFAM); SIGNAL_PEPTIDE_H_REGION (PHOBIUS); SIGNAL_PEPTIDE_N_REGION (PHOBIUS); NON_CYTOPLASMIC_DOMAIN (PHOBIUS); CYTOPLASMIC_DOMAIN (PHOBIUS); TRANSMEMBRANE (PHOBIUS); SIGNAL_PEPTIDE (PHOBIUS); SIGNAL_PEPTIDE_C_REGION (PHOBIUS); SignalP-TM (SIGNALP_GRAM_POSITIVE); SignalP-noTM (SIGNALP_EUK); TMhelix (TMHMM)
Aqu2.1.37879_001	ubiquitin carboxyl-terminal hydrolase 10	1005	20	4.94892e-93	0.6055	5	C:GO:0044424; P:GO:0006511; F:GO:0004843; P:GO:0016579; P:GO:0030330	-	IPR001394 (PFAM); PTHR24006 (PANTHER); IPR028767 (PTHR24006:PANTHER); IPR018200 (PROSITE_PATTERNS); IPR028889 (PROSITE_PROFILES); SSF54001 (SUPERFAMILY)
Aqu2.1.37880_001	e3 ubiquitin-protein ligase mylip-a-like	658	20	0	0.5515	5	P:GO:0009987; C:GO:0005856; F:GO:0005515; P:GO:0007275; C:GO:0005737	-	Coil (COILS); IPR019750 (PRINTS); IPR019749 (SMART); IPR019748 (PFAM); IPR018979 (PFAM); IPR014352 (G3DSA:1.20.80.GENE3D); G3DSA:3.10.20.90 (GENE3D); PF13920 (PFAM); IPR011993 (G3DSA:2.30.29.GENE3D); PTHR23280 (PANTHER); PTHR23280:SF0 (PANTHER); IPR000299 (PROSITE_PROFILES); SSF54236 (SUPERFAMILY); SSF50729 (SUPERFAMILY); IPR019748 (SUPERFAMILY)
Aqu2.1.37900_001	nadh dehydrogenase complex assembly factor 6	303	20	0	0.6655	5	C:GO:0005743; P:GO:0009058; F:GO:0016740; C:GO:0005634; P:GO:0032981	-	IPR008949 (G3DSA:1.10.600.GENE3D); IPR002060 (PFAM); PTHR21181 (PANTHER); PTHR21181:SF2 (PANTHER); IPR008949 (SUPERFAMILY)
Aqu2.1.37901_001	xaa-pro dipeptidase	498	20	0	0.786	3	P:GO:0009987; F:GO:0004177; F:GO:0030145	EC:3.4.11.0	IPR007865 (SMART); IPR007865 (PFAM); IPR000994 (G3DSA:3.90.230.GENE3D); G3DSA:3.40.350.10 (GENE3D); IPR000994 (PFAM); PTHR10804 (PANTHER); PTHR10804:SF17 (PANTHER); SSF53092 (SUPERFAMILY); IPR000994 (SUPERFAMILY)
Aqu2.1.37910_001	solute carrier family 15 member 4-like	471	20	3.00221e-92	0.4755	4	P:GO:0044765; F:GO:0008449; F:GO:0005215; P:GO:0006027	EC:3.1.6.14	TRANSMEMBRANE (PHOBIUS); CYTOPLASMIC_DOMAIN (PHOBIUS); CYTOPLASMIC_DOMAIN (PHOBIUS); TRANSMEMBRANE (PHOBIUS); TRANSMEMBRANE (PHOBIUS); TRANSMEMBRANE (PHOBIUS); TRANSMEMBRANE (PHOBIUS); CYTOPLASMIC_DOMAIN (PHOBIUS); NON_CYTOPLASMIC_DOMAIN (PHOBIUS); CYTOPLASMIC_DOMAIN (PHOBIUS); TRANSMEMBRANE (PHOBIUS); NON_CYTOPLASMIC_DOMAIN (PHOBIUS); TRANSMEMBRANE (PHOBIUS); NON_CYTOPLASMIC_DOMAIN (PHOBIUS); CY…
Aqu2.1.37919_001	maguk p55 subfamily member 5	1537	20	0	0.56	2	C:GO:0044464; F:GO:0005515	-	Coil (COILS); Coil (COILS); IPR001452 (SMART); IPR001478 (SMART); IPR001715 (SMART); IPR008145 (SMART); IPR011511 (PFAM); IPR001478 (PFAM); G3DSA:2.30.42.10 (GENE3D); IPR001715 (G3DSA:1.10.418.GENE3D); IPR001715 (PFAM); IPR008145 (PFAM); G3DSA:3.40.50.300 (GENE3D); G3DSA:1.10.287.650 (GENE3D); G3DSA:2.30.30.40 (GENE3D); G3DSA:3.30.63.10 (GENE3D); PTHR23122 (PANTHER); IPR008144 (PROSITE_PROFILES);…
Aqu2.1.37939_001	---NA---	334	0			0	-		IPR018800 (PFAM)
Aqu2.1.37958_001	probable trna threonylcarbamoyladenosine biosynthesis protein osgep-like	344	20	0	0.85	1	F:GO:0016787	-	IPR017861 (PRINTS); IPR017861 (TIGRFAM); IPR000905 (PFAM); G3DSA:3.30.420.40 (GENE3D); PTHR11735 (PANTHER); IPR017861 (PTHR11735:PANTHER); SSF53067 (SUPERFAMILY)
Aqu2.1.37967_001	ras-related protein raba4d-like	257	20	5.23826e-27	0.502	2	F:GO:0005525; P:GO:0007264		IPR001806 (PRINTS); IPR001806 (PFAM); G3DSA:3.40.50.300 (GENE3D); PS51419 (PROSITE_PROFILES); IPR027417 (SUPERFAMILY)
Aqu2.1.38043_001	---NA---	84	0			0	-		IPR003323 (PROSITE_PROFILES)
Aqu2.1.38086_001	---NA---	84	0			0	-		no IPS match
Aqu2.1.38114_001	extracellular serine proteinase-like	815	20	0	0.612	2	P:GO:0006508; F:GO:0004252	EC:3.4.21.0	IPR015500 (PRINTS); IPR000209 (PFAM); G3DSA:3.30.70.80 (GENE3D); IPR000209 (G3DSA:3.40.50.GENE3D); IPR015500 (PANTHER); IPR022398 (PROSITE_PATTERNS); IPR023828 (PROSITE_PATTERNS); IPR023827 (PROSITE_PATTERNS); SIGNAL_PEPTIDE_N_REGION (PHOBIUS); SIGNAL_PEPTIDE (PHOBIUS); SIGNAL_PEPTIDE_H_REGION (PHOBIUS); NON_CYTOPLASMIC_DOMAIN (PHOBIUS); SIGNAL_PEPTIDE_C_REGION (PHOBIUS); SignalP-noTM (SIGNALP_EU…
Aqu2.1.38134_001	secreted protein	290	20	1.29974e-26	0.455	4	F:GO:0046872; P:GO:0006281; F:GO:0008081; C:GO:0005634		SIGNAL_PEPTIDE_N_REGION (PHOBIUS); SIGNAL_PEPTIDE_C_REGION (PHOBIUS); SIGNAL_PEPTIDE (PHOBIUS); SIGNAL_PEPTIDE_H_REGION (PHOBIUS); NON_CYTOPLASMIC_DOMAIN (PHOBIUS); SignalP-noTM (SIGNALP_EUK); SignalP-TM (SIGNALP_GRAM_POSITIVE)
Aqu2.1.38140_001	m-phase inducer phosphatase	455	20	0	0.6635	19	P:GO:0035335; P:GO:0007498; P:GO:0007369; P:GO:0045792; P:GO:0000086; P:GO:0045977; F:GO:0004725; P:GO:0046331; P:GO:0007422; P:GO:0007030; P:GO:0045930; P:GO:0008284; P:GO:0007099; C:GO:0005694; P:GO:0007424; P:GO:0060305; C:GO:0005634; P:GO:0006570; P:GO:0000087	EC:3.1.3.48	IPR000751 (PRINTS); IPR001763 (SMART); IPR001763 (G3DSA:3.40.250.GENE3D); IPR001763 (PFAM); PTHR10828:SF17 (PANTHER); PTHR10828 (PANTHER); IPR001763 (PROSITE_PROFILES); IPR001763 (SUPERFAMILY)
Aqu2.1.38168_001	tyrosine-protein phosphatase non-receptor type 23	1047	20	1.2772e-135	0.5645	6	P:GO:0060271; C:GO:0005769; F:GO:0005515; P:GO:0043162; C:GO:0005932; C:GO:0005634	-	Coil (COILS); Coil (COILS); Coil (COILS); Coil (COILS); IPR004328 (SMART); G3DSA:1.20.140.50 (GENE3D); IPR025304 (PFAM); IPR004328 (G3DSA:1.25.40.GENE3D); G3DSA:1.20.120.560 (GENE3D); IPR004328 (PFAM); PTHR23030 (PANTHER); PTHR23030:SF11 (PANTHER); IPR004328 (PROSITE_PROFILES)
Aqu2.1.38177_001	---NA---	808	0			0	-		Coil (COILS)
Aqu2.1.38178_001	1-phosphatidylinositol 3-phosphate 5-kinase isoform x1	2468	20	0	0.584	7	C:GO:0044444; F:GO:0046872; P:GO:0035556; P:GO:0044267; F:GO:0005524; F:GO:0016307; P:GO:0046488	-	Coil (COILS); IPR000306 (SMART); IPR000591 (SMART); IPR016034 (SMART); IPR000591 (PFAM); IPR027483 (G3DSA:3.30.810.GENE3D); G3DSA:2.150.10.10 (GENE3D); IPR013083 (G3DSA:3.30.40.GENE3D); IPR002423 (PFAM); IPR011991 (G3DSA:1.10.10.GENE3D); IPR027409 (G3DSA:3.50.7.GENE3D); IPR002498 (PFAM); IPR027484 (G3DSA:3.30.800.GENE3D); IPR000306 (PFAM); IPR002423 (PANTHER); PTHR11353:SF14 (PANTHER); IPR002498 …
Aqu2.1.38324_001	IRX4	323	20	1.12779e-22	0.611	6	F:GO:0008233; F:GO:0046872; F:GO:0003700; P:GO:0006355; F:GO:0043565; C:GO:0005634	-	IPR001356 (SMART); IPR008422 (PFAM); IPR009057 (G3DSA:1.10.10.GENE3D); PTHR11211 (PANTHER); PTHR11211:SF10 (PANTHER); IPR017970 (PROSITE_PATTERNS); IPR001356 (PROSITE_PROFILES); IPR009057 (SUPERFAMILY)
Aqu2.1.38356_001	radial spoke head protein 4 homolog a	519	20	0	0.6815	1	C:GO:0005622	-	Coil (COILS); Coil (COILS); IPR006802 (PFAM); IPR006802 (PANTHER)
Aqu2.1.38404_001	g-protein coupled receptor 98	5861	20	0	0.4885	5	P:GO:0007423; P:GO:0030154; C:GO:0016021; F:GO:0004930; P:GO:0007218	-	IPR003644 (SMART); IPR003014 (PFAM); PF13385 (PFAM); G3DSA:3.50.4.10 (GENE3D); IPR013320 (G3DSA:2.60.120.GENE3D); IPR003644 (PFAM); IPR026919 (PTHR11878:PANTHER); PTHR11878 (PANTHER); NON_CYTOPLASMIC_DOMAIN (PHOBIUS); CYTOPLASMIC_DOMAIN (PHOBIUS); TRANSMEMBRANE (PHOBIUS); CYTOPLASMIC_DOMAIN (PHOBIUS); TRANSMEMBRANE (PHOBIUS); SIGNAL_PEPTIDE (PHOBIUS); TRANSMEMBRANE (PHOBIUS); SIGNAL_PEPTIDE_N_REG…
Aqu2.1.38441_001	peptidylprolyl isomerase	466	20	0	0.532	1	F:GO:0005515		IPR011990 (G3DSA:1.25.40.GENE3D); PTHR16263 (PANTHER); SSF48452 (SUPERFAMILY)
Aqu2.1.38442_001	HNF4	852	20	0	0.5795	9	P:GO:0043401; F:GO:0008270; P:GO:0006355; F:GO:0043565; F:GO:0003700; F:GO:0003707; C:GO:0005634; C:GO:0005667; P:GO:0045449	-	IPR000536 (SMART); IPR001628 (SMART); IPR001628 (PFAM); IPR013088 (G3DSA:3.30.50.GENE3D); IPR008946 (G3DSA:1.10.565.GENE3D); IPR000536 (PFAM); PTHR24083:SF5 (PANTHER); PTHR24083 (PANTHER); NON_CYTOPLASMIC_DOMAIN (PHOBIUS); SIGNAL_PEPTIDE_H_REGION (PHOBIUS); SIGNAL_PEPTIDE_C_REGION (PHOBIUS); SIGNAL_PEPTIDE_N_REGION (PHOBIUS); SIGNAL_PEPTIDE (PHOBIUS); IPR001628 (PROSITE_PROFILES); SignalP-TM (SIG…
Aqu2.1.38443_001	nuclear receptor subfamily 5 group a member 2-like	517	20	0	0.4865	7	P:GO:0043401; F:GO:0008270; P:GO:0006355; F:GO:0004887; F:GO:0043565; F:GO:0003707; C:GO:0005634	-	IPR001728 (PRINTS); IPR001723 (PRINTS); IPR001628 (PRINTS); IPR001628 (SMART); IPR000536 (SMART); IPR001628 (PFAM); IPR013088 (G3DSA:3.30.50.GENE3D); IPR000536 (PFAM); IPR008946 (G3DSA:1.10.565.GENE3D); PTHR24083 (PANTHER); IPR001628 (PROSITE_PATTERNS); IPR001628 (PROSITE_PROFILES); IPR008946 (SUPERFAMILY); SSF57716 (SUPERFAMILY)
Aqu2.1.38470_001	39s ribosomal protein mitochondrial	204	20	6.72593e-120	0.66	3	P:GO:0006412; C:GO:0005840; F:GO:0003735	-	IPR000206 (TIGRFAM); IPR013823 (PFAM); IPR014719 (G3DSA:3.30.1390.GENE3D); IPR000206 (PANTHER); IPR000206 (HAMAP); IPR008932 (SUPERFAMILY); IPR014719 (SUPERFAMILY)
Aqu2.1.38473_001	---NA---	570	0			0	-		SSF52129 (SUPERFAMILY)
Aqu2.1.38562_001	PREDICTED: hypothetical protein LOC100640912 [Amphimedon queenslandica]	2231	1	0	1	0	-		Coil (COILS); Coil (COILS); Coil (COILS)
Aqu2.1.38584_001	---NA---	130	0			0	-		SignalP-TM (SIGNALP_GRAM_POSITIVE); SignalP-noTM (SIGNALP_EUK)
Aqu2.1.38622_001	peptidyl-lys metalloendopeptidase	251	20	7.26857e-44	0.598	1	F:GO:0008237	-	PF14521 (PFAM); IPR024079 (G3DSA:3.40.390.GENE3D); SIGNAL_PEPTIDE_N_REGION (PHOBIUS); SIGNAL_PEPTIDE (PHOBIUS); SIGNAL_PEPTIDE_C_REGION (PHOBIUS); NON_CYTOPLASMIC_DOMAIN (PHOBIUS); SIGNAL_PEPTIDE_H_REGION (PHOBIUS); SignalP-noTM (SIGNALP_GRAM_NEGATIVE); SignalP-noTM (SIGNALP_EUK); SignalP-TM (SIGNALP_GRAM_POSITIVE); SSF55486 (SUPERFAMILY)
Aqu2.1.38652_001	deleted in malignant brain tumors 1	398	20	4.883e-95	0.548	3	C:GO:0016020; F:GO:0005044; P:GO:0007165	-	IPR001190 (PRINTS); IPR017448 (SMART); IPR001190 (PFAM); G3DSA:3.10.250.10 (GENE3D); PTHR19331 (PANTHER); PTHR19331:SF16 (PANTHER); IPR001190 (PROSITE_PATTERNS); NON_CYTOPLASMIC_DOMAIN (PHOBIUS); SIGNAL_PEPTIDE_N_REGION (PHOBIUS); SIGNAL_PEPTIDE_H_REGION (PHOBIUS); SIGNAL_PEPTIDE (PHOBIUS); SIGNAL_PEPTIDE_C_REGION (PHOBIUS); IPR001190 (PROSITE_PROFILES); IPR001190 (PROSITE_PROFILES); IPR001190 (P…
Aqu2.1.38668_001	major facilitator superfamily domain-containing protein 9	283	20	2.20761e-170	0.553	4	C:GO:0016021; C:GO:0005886; P:GO:0055085; F:GO:0005215	-	IPR001958 (PRINTS); IPR011701 (PFAM); G3DSA:1.20.1250.20 (GENE3D); PTHR24003:SF32 (PANTHER); PTHR24003 (PANTHER); TRANSMEMBRANE (PHOBIUS); CYTOPLASMIC_DOMAIN (PHOBIUS); NON_CYTOPLASMIC_DOMAIN (PHOBIUS); TRANSMEMBRANE (PHOBIUS); NON_CYTOPLASMIC_DOMAIN (PHOBIUS); CYTOPLASMIC_DOMAIN (PHOBIUS); TRANSMEMBRANE (PHOBIUS); TRANSMEMBRANE (PHOBIUS); NON_CYTOPLASMIC_DOMAIN (PHOBIUS); CYTOPLASMIC_DOMAIN (PHO…
Aqu2.1.38690_001	mitogen-activated protein kinase-binding protein 1-like	1377	20	0	0.607	1	F:GO:0005515		Coil (COILS); IPR001680 (SMART); IPR015943 (G3DSA:2.130.10.GENE3D); IPR001680 (PFAM); IPR015943 (G3DSA:2.130.10.GENE3D); PTHR22847:SF10 (PANTHER); PTHR22847 (PANTHER); IPR019775 (PROSITE_PATTERNS); IPR017986 (PROSITE_PROFILES); IPR017986 (PROSITE_PROFILES); IPR001680 (PROSITE_PROFILES); IPR001680 (PROSITE_PROFILES); IPR001680 (PROSITE_PROFILES); IPR017986 (SUPERFAMILY); IPR011047 (SUPERFAMILY)
Aqu2.1.38691_001	methylcytosine dioxygenase tet1	1120	20	0	0.5885	7	P:GO:0006351; P:GO:0044763; P:GO:0043412; P:GO:0019219; P:GO:0040029; F:GO:0003677; F:GO:0008270	-	Coil (COILS); IPR002857 (PFAM); IPR024779 (PFAM); PTHR23358 (PANTHER); IPR002857 (PROSITE_PROFILES)
Aqu2.1.38713_001	g-protein coupled receptor 161 isoform x3	356	20	1.02367e-90	0.511	3	P:GO:0007186; C:GO:0016021; F:GO:0004930		IPR000276 (PRINTS); IPR000276 (PFAM); G3DSA:1.20.1070.10 (GENE3D); PTHR24249:SF89 (PANTHER); PTHR24249 (PANTHER); IPR000276 (PROSITE_PATTERNS); NON_CYTOPLASMIC_DOMAIN (PHOBIUS); NON_CYTOPLASMIC_DOMAIN (PHOBIUS); CYTOPLASMIC_DOMAIN (PHOBIUS); CYTOPLASMIC_DOMAIN (PHOBIUS); TRANSMEMBRANE (PHOBIUS); NON_CYTOPLASMIC_DOMAIN (PHOBIUS); NON_CYTOPLASMIC_DOMAIN (PHOBIUS); TRANSMEMBRANE (PHOBIUS); TRANSMEMB…
Aqu2.1.38744_001	forkhead box protein l1	521	20	0	0.8285	19	P:GO:0007495; P:GO:0043010; P:GO:0007507; P:GO:0061146; P:GO:0051216; P:GO:0007389; P:GO:0035138; P:GO:0045892; P:GO:0030111; P:GO:0007420; F:GO:0043565; P:GO:0009790; P:GO:0009887; F:GO:0003700; P:GO:0030166; C:GO:0005634; F:GO:0008301; C:GO:0005667; P:GO:0045449	-	IPR001766 (PRINTS); IPR001766 (SMART); IPR001766 (PFAM); IPR011991 (G3DSA:1.10.10.GENE3D); PTHR11829 (PANTHER); IPR001766 (PROSITE_PROFILES); SSF46785 (SUPERFAMILY)
Aqu2.1.38788_001	scavenger receptor cysteine-rich protein	1525	20	0	0.5085	4	P:GO:0010466; C:GO:0005576; F:GO:0004867; F:GO:0005515	-	IPR002223 (PRINTS); IPR002223 (SMART); IPR006150 (SMART); IPR000716 (SMART); IPR008197 (SMART); IPR001007 (SMART); IPR008197 (G3DSA:4.10.75.GENE3D); IPR002223 (PFAM); IPR008197 (PFAM); IPR002223 (G3DSA:4.10.410.GENE3D); IPR008037 (PFAM); IPR000716 (G3DSA:4.10.800.GENE3D); IPR002919 (PFAM); G3DSA:2.10.25.10 (GENE3D); IPR000716 (PFAM); PTHR23259 (PANTHER); IPR020901 (PROSITE_PATTERNS); IPR000716 (P…
Aqu2.1.38941_001	interferon regulatory factor 2-binding protein 2 isoform 1	238	20	1.86568e-11	0.6545	2	P:GO:0006355; C:GO:0005634	-	IPR022750 (PFAM); CYTOPLASMIC_DOMAIN (PHOBIUS); TRANSMEMBRANE (PHOBIUS); NON_CYTOPLASMIC_DOMAIN (PHOBIUS); TMhelix (TMHMM)
Aqu2.1.39165_001	PREDICTED: hypothetical protein LOC100635014 [Amphimedon queenslandica]	503	4	0	0.6125	0	-		CYTOPLASMIC_DOMAIN (PHOBIUS); NON_CYTOPLASMIC_DOMAIN (PHOBIUS); TRANSMEMBRANE (PHOBIUS); CYTOPLASMIC_DOMAIN (PHOBIUS); CYTOPLASMIC_DOMAIN (PHOBIUS); TRANSMEMBRANE (PHOBIUS); TRANSMEMBRANE (PHOBIUS); NON_CYTOPLASMIC_DOMAIN (PHOBIUS); NON_CYTOPLASMIC_DOMAIN (PHOBIUS); TRANSMEMBRANE (PHOBIUS); TRANSMEMBRANE (PHOBIUS); NON_CYTOPLASMIC_DOMAIN (PHOBIUS); CYTOPLASMIC_DOMAIN (PHOBIUS); TRANSMEMBRANE (PHO…
Aqu2.1.39181_001	fh protein interacting protein fip2-like	334	20	7.28936e-07	0.474	2	F:GO:0005515; P:GO:0051260		Coil (COILS); IPR000210 (SMART); IPR011333 (G3DSA:3.30.710.GENE3D); IPR003131 (PFAM); PTHR14499 (PANTHER); PTHR14499:SF11 (PANTHER); IPR011333 (SUPERFAMILY); SSF141571 (SUPERFAMILY)
Aqu2.1.39244_001	nmra-like family domain-containing protein 1-like	290	20	0	0.7065	0	-		IPR016040 (G3DSA:3.40.50.GENE3D); IPR008030 (PFAM); PTHR14194 (PANTHER); PTHR14194:SF6 (PANTHER); SIGNAL_PEPTIDE_C_REGION (PHOBIUS); SIGNAL_PEPTIDE_N_REGION (PHOBIUS); SIGNAL_PEPTIDE (PHOBIUS); NON_CYTOPLASMIC_DOMAIN (PHOBIUS); SIGNAL_PEPTIDE_H_REGION (PHOBIUS); SSF51735 (SUPERFAMILY)
Aqu2.1.39348_001	tensin-1-like isoform x6	1286	20	0	0.6805	6	F:GO:0004725; P:GO:0035335; P:GO:0006570; F:GO:0005515; P:GO:0035556; F:GO:0046872	EC:3.1.3.48	Coil (COILS); IPR000980 (SMART); IPR002219 (SMART); IPR003595 (SMART); IPR013625 (PFAM); IPR014020 (PFAM); IPR011993 (G3DSA:2.30.29.GENE3D); IPR000242 (PFAM); IPR000980 (PFAM); G3DSA:2.60.40.1110 (GENE3D); G3DSA:3.30.60.20 (GENE3D); IPR000980 (G3DSA:3.30.505.GENE3D); G3DSA:3.90.190.10 (GENE3D); PTHR12305 (PANTHER); IPR007087 (PROSITE_PATTERNS); IPR016130 (PROSITE_PATTERNS); IPR014020 (PROSITE_PRO…
Aqu2.1.39415_001	c protein immunoglobulin-a-binding beta antigen	95	20	1.12079e-22	0.557	0	-		PTHR24637:SF164 (PANTHER); PTHR24637 (PANTHER)
Aqu2.1.39594_001	major facilitator superfamily domain-containing protein 5	464	20	0	0.582	0	-		IPR008509 (PFAM); G3DSA:1.20.1250.20 (GENE3D); PTHR24003:SF368 (PANTHER); PTHR24003 (PANTHER); TRANSMEMBRANE (PHOBIUS); NON_CYTOPLASMIC_DOMAIN (PHOBIUS); TRANSMEMBRANE (PHOBIUS); NON_CYTOPLASMIC_DOMAIN (PHOBIUS); TRANSMEMBRANE (PHOBIUS); TRANSMEMBRANE (PHOBIUS); TRANSMEMBRANE (PHOBIUS); TRANSMEMBRANE (PHOBIUS); NON_CYTOPLASMIC_DOMAIN (PHOBIUS); NON_CYTOPLASMIC_DOMAIN (PHOBIUS); NON_CYTOPLASMIC_DO…
Aqu2.1.39619_001	hypothetical protein CAPTEDRAFT_217035 [Capitella teleta]	562	13	1.619e-23	0.44	3	P:GO:0044237; F:GO:0003824; F:GO:0050662		IPR016040 (G3DSA:3.40.50.GENE3D); NON_CYTOPLASMIC_DOMAIN (PHOBIUS); CYTOPLASMIC_DOMAIN (PHOBIUS); TRANSMEMBRANE (PHOBIUS); SSF51735 (SUPERFAMILY); TMhelix (TMHMM)
Aqu2.1.39624_001	hydroxyethylthiazole kinase	273	20	0	0.6745	3	F:GO:0004417; F:GO:0043167; P:GO:0009228	EC:2.7.1.50	IPR000417 (PRINTS); IPR000417 (PIRSF); IPR000417 (PFAM); IPR000417 (TIGRFAM); G3DSA:3.40.1190.20 (GENE3D); PTHR20857 (PANTHER); PTHR20857:SF15 (PANTHER); IPR000417 (HAMAP); SSF53613 (SUPERFAMILY)
Aqu2.1.39629_001	diphthamide biosynthesis protein 1-like	423	20	0	0.786	3	P:GO:0017183; C:GO:0005737; P:GO:0008283	-	IPR016435 (PIRSF); IPR002728 (TIGRFAM); IPR002728 (PFAM); IPR016435 (PTHR10762:PANTHER); IPR002728 (PANTHER)
Aqu2.1.39647_001	receptor-type tyrosine-protein phosphatase s isoform x2	544	20	1.40448e-159	0.5145	1	F:GO:0005515		PR00014 (PRINTS); IPR003961 (SMART); IPR013783 (G3DSA:2.60.40.GENE3D); IPR003961 (PFAM); IPR013783 (G3DSA:2.60.40.GENE3D); PTHR10489 (PANTHER); TRANSMEMBRANE (PHOBIUS); NON_CYTOPLASMIC_DOMAIN (PHOBIUS); CYTOPLASMIC_DOMAIN (PHOBIUS); IPR003961 (PROSITE_PROFILES); IPR003961 (PROSITE_PROFILES); IPR003961 (PROSITE_PROFILES); IPR003961 (PROSITE_PROFILES); IPR003961 (SUPERFAMILY); IPR003961 (SUPERFAMIL…
Aqu2.1.39648_001	latrophilin-2-like isoform x3	2205	20	0	0.546	4	C:GO:0016021; F:GO:0004930; P:GO:0007218; F:GO:0005515	-	Coil (COILS); IPR000832 (PRINTS); IPR003598 (SMART); IPR001879 (SMART); IPR000203 (SMART); IPR003599 (SMART); PF13895 (PFAM); IPR001879 (PFAM); IPR000832 (PFAM); IPR022624 (PFAM); IPR013783 (G3DSA:2.60.40.GENE3D); IPR000203 (PFAM); IPR013783 (G3DSA:2.60.40.GENE3D); IPR013106 (PFAM); PTHR12011 (PANTHER); NON_CYTOPLASMIC_DOMAIN (PHOBIUS); CYTOPLASMIC_DOMAIN (PHOBIUS); SIGNAL_PEPTIDE_C_REGION (PHOBI…
Aqu2.1.39705_001	fibrous sheath-interacting protein 2-like	480	20	0	0.5335	0	-		Coil (COILS); Coil (COILS); Coil (COILS)
Aqu2.1.39717_001	inositol-3-phosphate synthase 1-a-like	879	20	0	0.83	6	C:GO:0005737; P:GO:0008654; F:GO:0004512; P:GO:0006021; P:GO:0019872; F:GO:0005515	EC:5.5.1.4	Coil (COILS); Coil (COILS); IPR016040 (G3DSA:3.40.50.GENE3D); G3DSA:3.30.360.10 (GENE3D); IPR013021 (PFAM); IPR002587 (PFAM); IPR002587 (PANTHER); PTHR11510:SF0 (PANTHER); SSF55347 (SUPERFAMILY); SSF51735 (SUPERFAMILY); IPR000008 (SUPERFAMILY)
Aqu2.1.39734_001	peptidyl-prolyl cis-trans isomerase e-like	316	20	0	0.8275	5	P:GO:0006457; P:GO:0000413; F:GO:0003723; F:GO:0003755; F:GO:0000166	EC:5.2.1.8	IPR002130 (PRINTS); IPR016304 (PIRSF); IPR000504 (SMART); IPR002130 (PFAM); IPR000504 (PFAM); IPR012677 (G3DSA:3.30.70.GENE3D); G3DSA:2.40.100.10 (GENE3D); PTHR11071 (PANTHER); PTHR11071:SF72 (PANTHER); IPR020892 (PROSITE_PATTERNS); IPR000504 (PROSITE_PROFILES); IPR002130 (PROSITE_PROFILES); SSF54928 (SUPERFAMILY); IPR002130 (SUPERFAMILY)
Aqu2.1.39742_001	ap-1 complex subunit beta-1 isoform x1	945	20	0	0.7935	5	F:GO:0008565; P:GO:0016192; P:GO:0006886; C:GO:0030131; F:GO:0005488	-	IPR015151 (SMART); IPR008152 (SMART); IPR016342 (PIRSF); IPR013037 (G3DSA:2.60.40.GENE3D); IPR011989 (G3DSA:1.25.10.GENE3D); IPR015151 (PFAM); IPR012295 (G3DSA:3.30.310.GENE3D); IPR008152 (PFAM); IPR002553 (PFAM); PTHR11134:SF3 (PANTHER); IPR026739 (PANTHER); IPR013041 (SUPERFAMILY); IPR009028 (SUPERFAMILY); IPR016024 (SUPERFAMILY)
Aqu2.1.39751_001	dna polymerase delta subunit 4	110	20	3.06013e-65	0.6895	2	C:GO:0043625; P:GO:0006261	-	IPR007218 (PFAM); PTHR14303 (PANTHER)
Aqu2.1.39753_001	sh2b adapter protein 1 isoform x1	815	20	7.68371e-30	0.692	20	P:GO:0030032; C:GO:0005884; C:GO:0016020; P:GO:0008286; P:GO:2000278; F:GO:0005068; P:GO:0006928; P:GO:0050873; P:GO:0050851; C:GO:0005829; P:GO:0019221; P:GO:0030036; C:GO:0001726; P:GO:0007596; P:GO:0009966; P:GO:0001922; C:GO:0001725; P:GO:0045840; F:GO:0005070; P:GO:0035556	-	IPR001849 (SMART); IPR000980 (SMART); IPR000980 (G3DSA:3.30.505.GENE3D); IPR000980 (PFAM); PTHR10872:SF2 (PANTHER); PTHR10872 (PANTHER); IPR000980 (PROSITE_PROFILES); SSF55550 (SUPERFAMILY); SSF50729 (SUPERFAMILY)
Aqu2.1.39821_001	protein	1005	3	3.39625e-15	0.413333	0	-		IPR003368 (TIGRFAM); IPR012334 (G3DSA:2.160.20.GENE3D); CYTOPLASMIC_DOMAIN (PHOBIUS); TRANSMEMBRANE (PHOBIUS); CYTOPLASMIC_DOMAIN (PHOBIUS); TRANSMEMBRANE (PHOBIUS); SIGNAL_PEPTIDE (PHOBIUS); SIGNAL_PEPTIDE_N_REGION (PHOBIUS); NON_CYTOPLASMIC_DOMAIN (PHOBIUS); SIGNAL_PEPTIDE_C_REGION (PHOBIUS); NON_CYTOPLASMIC_DOMAIN (PHOBIUS); TRANSMEMBRANE (PHOBIUS); CYTOPLASMIC_DOMAIN (PHOBIUS); TRANSMEMBRANE …
Aqu2.1.40014_001	brain protein 44	105	20	1.24012e-69	0.839	2	C:GO:0005743; P:GO:0006850	-	IPR005336 (PFAM); PTHR14154 (PANTHER); PTHR14154:SF2 (PANTHER); TRANSMEMBRANE (PHOBIUS); TRANSMEMBRANE (PHOBIUS); CYTOPLASMIC_DOMAIN (PHOBIUS); CYTOPLASMIC_DOMAIN (PHOBIUS); TRANSMEMBRANE (PHOBIUS); NON_CYTOPLASMIC_DOMAIN (PHOBIUS); NON_CYTOPLASMIC_DOMAIN (PHOBIUS)
Aqu2.1.40218_001	PREDICTED: hypothetical protein LOC100639764 [Amphimedon queenslandica]	115	2	2.32093e-08	0.61	3	F:GO:0003723; P:GO:0006278; F:GO:0003964		no IPS match
Aqu2.1.40428_001	uncharacterized protein loc101236297	835	20	2.25402e-81	0.4895	2	F:GO:0003677; F:GO:0008270		IPR002857 (PFAM); IPR002857 (PROSITE_PROFILES); IPR007527 (PROSITE_PROFILES); SSF54001 (SUPERFAMILY)
Aqu2.1.40442_001	uncharacterized protein loc103317341	212	20	5.50964e-16	0.607	1	F:GO:0005488	-	no IPS match
Aqu2.1.40600_001	myosin light chain smooth muscle-like	472	20	1.57911e-46	0.485	4	F:GO:0005515; F:GO:0005524; P:GO:0006468; F:GO:0004672		IPR003598 (SMART); IPR003961 (SMART); IPR003599 (SMART); IPR000719 (PFAM); IPR013098 (PFAM); IPR013783 (G3DSA:2.60.40.GENE3D); IPR013783 (G3DSA:2.60.40.GENE3D); G3DSA:3.30.200.20 (GENE3D); IPR003961 (PFAM); G3DSA:1.10.510.10 (GENE3D); IPR015725 (PTHR22964:PANTHER); IPR020675 (PANTHER); IPR000719 (PROSITE_PROFILES); IPR007110 (PROSITE_PROFILES); IPR003961 (PROSITE_PROFILES); IPR011009 (SUPERFAMILY…
Aqu2.1.40639_001	myoferlin isoform x2	2075	20	0	0.616	2	F:GO:0005515; C:GO:0016021		IPR000008 (SMART); IPR006614 (SMART); IPR006614 (SMART); IPR012968 (PFAM); IPR000008 (PFAM); G3DSA:2.60.40.150 (GENE3D); G3DSA:2.60.40.150 (GENE3D); IPR012561 (PFAM); G3DSA:2.60.40.150 (GENE3D); G3DSA:2.60.40.150 (GENE3D); PTHR12546 (PANTHER); CYTOPLASMIC_DOMAIN (PHOBIUS); TRANSMEMBRANE (PHOBIUS); NON_CYTOPLASMIC_DOMAIN (PHOBIUS); IPR000008 (PROSITE_PROFILES); IPR000008 (PROSITE_PROFILES); IPR000…
Aqu2.1.40674_001	tnf receptor-associated factor 5-like	453	20	7.48642e-11	0.5175	2	F:GO:0008270; F:GO:0005515		Coil (COILS); G3DSA:3.40.220.10 (GENE3D); PTHR10131 (PANTHER); PTHR10131:SF52 (PANTHER); IPR001293 (PROSITE_PROFILES); PS51257 (PROSITE_PROFILES); IPR008974 (SUPERFAMILY); SSF52949 (SUPERFAMILY)
Aqu2.1.40697_001	deleted in malignant brain tumors 1	1857	20	0	0.495	3	C:GO:0016020; F:GO:0005044; P:GO:0007165	-	IPR001190 (PRINTS); IPR017448 (SMART); IPR001190 (PFAM); G3DSA:3.10.250.10 (GENE3D); PTHR19331 (PANTHER); IPR001190 (PROSITE_PATTERNS); IPR001190 (PROSITE_PATTERNS); IPR001190 (PROSITE_PATTERNS); IPR001190 (PROSITE_PATTERNS); IPR001190 (PROSITE_PATTERNS); SIGNAL_PEPTIDE_H_REGION (PHOBIUS); TRANSMEMBRANE (PHOBIUS); SIGNAL_PEPTIDE (PHOBIUS); SIGNAL_PEPTIDE_N_REGION (PHOBIUS); CYTOPLASMIC_DOMAIN (PH…
Aqu2.1.40781_001	methyltransferase-like protein 4	439	20	0	0.52	2	P:GO:0006139; F:GO:0008168		IPR007757 (PFAM); PTHR14475 (PANTHER); PTHR14475:SF2 (PANTHER); IPR007757 (PROSITE_PROFILES); SSF53335 (SUPERFAMILY)
Aqu2.1.40831_001	wd repeat-containing protein 26-like	874	20	0	0.6885	1	F:GO:0005515		Coil (COILS); IPR006594 (SMART); IPR001680 (SMART); IPR001680 (PFAM); IPR015943 (G3DSA:2.130.10.GENE3D); PTHR22838 (PANTHER); IPR006595 (PROSITE_PROFILES); IPR017986 (PROSITE_PROFILES); IPR001680 (PROSITE_PROFILES); IPR006594 (PROSITE_PROFILES); IPR001680 (PROSITE_PROFILES); IPR017986 (SUPERFAMILY)
Aqu2.1.40861_001	inactive tyrosine-protein kinase 7	1132	20	5.79258e-74	0.508	25	F:GO:0043548; P:GO:0008284; P:GO:0006955; P:GO:0018108; P:GO:0051389; P:GO:0046328; F:GO:0031994; P:GO:0048513; C:GO:0043231; P:GO:0045740; F:GO:0043559; F:GO:0005010; P:GO:0051262; F:GO:0043560; F:GO:0042802; F:GO:0005158; P:GO:0048009; P:GO:0030335; P:GO:0014065; P:GO:0046777; P:GO:0043066; P:GO:0044767; P:GO:0008286; C:GO:0005899; F:GO:0005524	-	IPR001245 (PRINTS); IPR003599 (SMART); IPR003598 (SMART); IPR013783 (G3DSA:2.60.40.GENE3D); IPR013098 (PFAM); PF13895 (PFAM); IPR013783 (G3DSA:2.60.40.GENE3D); IPR013783 (G3DSA:2.60.40.GENE3D); G3DSA:1.10.510.10 (GENE3D); IPR013783 (G3DSA:2.60.40.GENE3D); IPR013783 (G3DSA:2.60.40.GENE3D); G3DSA:3.30.200.20 (GENE3D); IPR001245 (PFAM); IPR013783 (G3DSA:2.60.40.GENE3D); PTHR24416 (PANTHER); IPR00826…
Aqu2.1.40883_001	hypothetical protein LOTGIDRAFT_229856 [Lottia gigantea]	329	2	0.000150647	0.49	1	F:GO:0046872		IPR000571 (SMART); IPR000571 (PFAM); IPR000571 (G3DSA:4.10.1000.GENE3D); IPR000571 (PROSITE_PROFILES); SSF90229 (SUPERFAMILY)
Aqu2.1.40972_001	plasma membrane calcium-transporting atpase 2 isoform x1	1256	20	0	0.633	5	P:GO:0006812; C:GO:0016021; F:GO:0046872; F:GO:0000166; F:GO:0005388		IPR001757 (PRINTS); IPR004014 (SMART); IPR008250 (G3DSA:2.70.150.GENE3D); IPR023298 (G3DSA:1.20.1110.GENE3D); IPR023214 (PFAM); IPR001757 (TIGRFAM); IPR008250 (PFAM); IPR004014 (PFAM); IPR023299 (G3DSA:3.40.1110.GENE3D); IPR006068 (PFAM); IPR022141 (PFAM); PTHR24093 (PANTHER); PTHR24093:SF1 (PANTHER); IPR018303 (PROSITE_PATTERNS); NON_CYTOPLASMIC_DOMAIN (PHOBIUS); TRANSMEMBRANE (PHOBIUS); NON_CYT…
Aqu2.1.40985_001	---NA---	76	0			0	-		CYTOPLASMIC_DOMAIN (PHOBIUS); TRANSMEMBRANE (PHOBIUS); NON_CYTOPLASMIC_DOMAIN (PHOBIUS); CYTOPLASMIC_DOMAIN (PHOBIUS); TRANSMEMBRANE (PHOBIUS); TMhelix (TMHMM)
Aqu2.1.41006_001	integrator complex subunit 6-like isoform x1	1768	20	0	0.6135	0	-		Coil (COILS); PF13519 (PFAM); PF15300 (PFAM); PTHR12957 (PANTHER); PTHR12957:SF2 (PANTHER); SSF53300 (SUPERFAMILY)
Aqu2.1.41008_001	heme-binding protein 2	210	20	7.5424e-153	0.624	1	C:GO:0005737		IPR006917 (PFAM); IPR006917 (PANTHER); SIGNAL_PEPTIDE_N_REGION (PHOBIUS); SIGNAL_PEPTIDE (PHOBIUS); SIGNAL_PEPTIDE_C_REGION (PHOBIUS); NON_CYTOPLASMIC_DOMAIN (PHOBIUS); SIGNAL_PEPTIDE_H_REGION (PHOBIUS); SignalP-noTM (SIGNALP_EUK); SignalP-TM (SIGNALP_GRAM_POSITIVE); IPR011256 (SUPERFAMILY)
Aqu2.1.41023_001	leukocyte receptor cluster member 9	1666	20	0	0.5335	4	F:GO:0046872; F:GO:0005515; F:GO:0003824; F:GO:0003676		Coil (COILS); IPR000571 (SMART); IPR006575 (SMART); IPR018812 (PFAM); G3DSA:3.40.50.300 (GENE3D); IPR009097 (G3DSA:3.90.1140.GENE3D); IPR019510 (PFAM); IPR001374 (PFAM); IPR006575 (PFAM); IPR016135 (G3DSA:3.10.110.GENE3D); G3DSA:3.30.1370.50 (GENE3D); PF13671 (PFAM); PTHR15934:SF1 (PANTHER); PTHR15934 (PANTHER); IPR000571 (PROSITE_PROFILES); IPR001374 (PROSITE_PROFILES); IPR006575 (PROSITE_PROFIL…
Aqu2.1.41119_001	plexin domain-containing protein 2 isoform x2	419	20	0	0.5645	4	F:GO:0004872; P:GO:0007275; C:GO:0016020; P:GO:0007165	-	IPR016201 (SMART); PTHR13055 (PANTHER); SIGNAL_PEPTIDE_N_REGION (PHOBIUS); TRANSMEMBRANE (PHOBIUS); NON_CYTOPLASMIC_DOMAIN (PHOBIUS); CYTOPLASMIC_DOMAIN (PHOBIUS); SIGNAL_PEPTIDE_C_REGION (PHOBIUS); SIGNAL_PEPTIDE (PHOBIUS); SIGNAL_PEPTIDE_H_REGION (PHOBIUS); SignalP-noTM (SIGNALP_GRAM_NEGATIVE); SignalP-noTM (SIGNALP_EUK); TMhelix (TMHMM)
Aqu2.1.41157_001	ZBTB7A	465	20	0	0.6495	1	F:GO:0005515		PR00501 (PRINTS); IPR000210 (SMART); IPR011705 (SMART); IPR006652 (SMART); IPR013069 (PFAM); IPR011333 (G3DSA:3.30.710.GENE3D); IPR015916 (G3DSA:2.130.10.GENE3D); IPR011705 (PFAM); IPR006652 (PFAM); PTHR24412 (PANTHER); IPR000210 (PROSITE_PROFILES); IPR011333 (SUPERFAMILY); SSF117281 (SUPERFAMILY)
Aqu2.1.41158_001	transcriptional sir2 family protein	419	20	0	0.6375	1	F:GO:0070403	-	IPR026591 (G3DSA:3.30.1600.GENE3D); G3DSA:3.40.50.1220 (GENE3D); IPR003000 (PFAM); IPR003000 (PANTHER); IPR026590 (PROSITE_PROFILES); SSF52467 (SUPERFAMILY)
Aqu2.1.41190_001	septin-6 isoform x4	419	20	0	0.794	11	P:GO:0000910; P:GO:0019048; C:GO:0030496; C:GO:0008021; C:GO:0031105; C:GO:0032154; F:GO:0005515; C:GO:0005819; C:GO:0000777; C:GO:0043679; F:GO:0005525	-	Coil (COILS); IPR016491 (PIRSF); G3DSA:3.40.50.300 (GENE3D); IPR000038 (PFAM); IPR000038 (PANTHER); PTHR18884:SF28 (PANTHER); IPR027417 (SUPERFAMILY)
Aqu2.1.41204_001	protein furry homolog-like	3756	20	0	0.554	2	P:GO:0030001; F:GO:0046872		Coil (COILS); Coil (COILS); Coil (COILS); G3DSA:3.30.70.100 (GENE3D); IPR011989 (G3DSA:1.25.10.GENE3D); PF14228 (PFAM); IPR025614 (PFAM); IPR006121 (PFAM); IPR025481 (PFAM); PTHR12295 (PANTHER); IPR006121 (PROSITE_PROFILES); IPR016024 (SUPERFAMILY); IPR006121 (SUPERFAMILY); IPR016024 (SUPERFAMILY)
Aqu2.1.41205_001	---NA---	239	0			0	-		TRANSMEMBRANE (PHOBIUS); CYTOPLASMIC_DOMAIN (PHOBIUS); NON_CYTOPLASMIC_DOMAIN (PHOBIUS); SignalP-TM (SIGNALP_GRAM_POSITIVE)
Aqu2.1.41213_001	protein cbp-1-like	290	1	0	1	9	F:GO:0003712; F:GO:0008270; P:GO:0006355; F:GO:0004402; P:GO:0016573; C:GO:0005667; P:GO:0045449; C:GO:0000123; P:GO:0042967	EC:2.3.1.48	no IPS match
Aqu2.1.41314_001	rhs family protein	241	7	4.04358e-98	0.675714	0	-		SIGNAL_PEPTIDE_C_REGION (PHOBIUS); NON_CYTOPLASMIC_DOMAIN (PHOBIUS); SIGNAL_PEPTIDE_N_REGION (PHOBIUS); SIGNAL_PEPTIDE (PHOBIUS); SIGNAL_PEPTIDE_H_REGION (PHOBIUS); SignalP-noTM (SIGNALP_EUK); SignalP-TM (SIGNALP_GRAM_POSITIVE); SignalP-noTM (SIGNALP_GRAM_NEGATIVE)
Aqu2.1.41333_001	beta-sarcoglycan	300	20	1.10405e-18	0.4325	3	C:GO:0016021; C:GO:0016012; P:GO:0007517	-	IPR006875 (PFAM); IPR027659 (PANTHER); CYTOPLASMIC_DOMAIN (PHOBIUS); NON_CYTOPLASMIC_DOMAIN (PHOBIUS); TRANSMEMBRANE (PHOBIUS); TMhelix (TMHMM)
Aqu2.1.41391_001	udp-glucose 6-dehydrogenase	464	20	0	0.817	8	F:GO:0051287; F:GO:0003979; P:GO:0001702; C:GO:0005829; P:GO:0055114; P:GO:0005982; P:GO:0005985; P:GO:0009117	EC:1.1.1.22	IPR014027 (SMART); IPR028356 (PIRSF); IPR017476 (PIRSF); IPR001732 (PFAM); IPR016040 (G3DSA:3.40.50.GENE3D); IPR014026 (PFAM); G3DSA:1.20.5.100 (GENE3D); IPR017476 (TIGRFAM); IPR014027 (PFAM); IPR017476 (PANTHER); IPR028356 (PTHR11374:PANTHER); IPR014027 (SUPERFAMILY); IPR008927 (SUPERFAMILY); SSF51735 (SUPERFAMILY)
Aqu2.1.41430_001	vacuolar protein sorting-associated protein 13d	3889	20	0	0.541	3	F:GO:0008138; P:GO:0006470; F:GO:0004725		Coil (COILS); IPR000340 (PFAM); IPR026854 (PFAM); IPR009543 (PFAM); G3DSA:3.90.190.10 (GENE3D); IPR026847 (PANTHER); PTHR16166:SF24 (PANTHER); IPR016130 (PROSITE_PATTERNS); IPR000772 (PROSITE_PROFILES); IPR015940 (PROSITE_PROFILES); IPR000387 (PROSITE_PROFILES); SSF52799 (SUPERFAMILY)
Aqu2.1.41538_001	probable trna guanylyltransferase	283	20	2.16411e-171	0.6995	8	C:GO:0005739; F:GO:0042802; F:GO:0005524; F:GO:0000287; P:GO:0051289; P:GO:0006400; F:GO:0008193; F:GO:0005525	-	IPR007537 (PIRSF); IPR025845 (PFAM); IPR024956 (PFAM); PTHR12729:SF0 (PANTHER); IPR007537 (PANTHER); NON_CYTOPLASMIC_DOMAIN (PHOBIUS); TRANSMEMBRANE (PHOBIUS); CYTOPLASMIC_DOMAIN (PHOBIUS); TMhelix (TMHMM)
Aqu2.1.41541_001	regulator of chromosome condensation repeat domain containing protein	1541	20	2.81854e-142	0.4515	1	F:GO:0005515		IPR000408 (PRINTS); IPR009091 (G3DSA:2.130.10.GENE3D); IPR000408 (PFAM); IPR009091 (G3DSA:2.130.10.GENE3D); IPR015943 (G3DSA:2.130.10.GENE3D); PTHR22870 (PANTHER); IPR000408 (PROSITE_PATTERNS); IPR000408 (PROSITE_PATTERNS); IPR000408 (PROSITE_PROFILES); IPR000408 (PROSITE_PROFILES); IPR000408 (PROSITE_PROFILES); IPR000408 (PROSITE_PROFILES); IPR000408 (PROSITE_PROFILES); IPR011044 (SUPERFAMILY); …
Aqu2.1.41564_001	PREDICTED: hypothetical protein LOC100637079 [Amphimedon queenslandica]	7779	20	0	0.4365	1	F:GO:0005515		IPR002909 (SMART); IPR002909 (PFAM); IPR013783 (G3DSA:2.60.40.GENE3D); IPR013783 (G3DSA:2.60.40.GENE3D); IPR014756 (SUPERFAMILY); IPR014756 (SUPERFAMILY); IPR014756 (SUPERFAMILY)
Aqu2.1.41572_001	n-acetylgalactosamine-6-sulfatase isoform x1	524	20	0	0.785	2	P:GO:0008152; F:GO:0008484	EC:3.1.6.0	PF14707 (PFAM); IPR017849 (G3DSA:3.40.720.GENE3D); IPR000917 (PFAM); G3DSA:3.30.1120.10 (GENE3D); PTHR10342:SF27 (PANTHER); PTHR10342 (PANTHER); IPR024607 (PROSITE_PATTERNS); IPR024607 (PROSITE_PATTERNS); SIGNAL_PEPTIDE (PHOBIUS); NON_CYTOPLASMIC_DOMAIN (PHOBIUS); SIGNAL_PEPTIDE_N_REGION (PHOBIUS); SIGNAL_PEPTIDE_C_REGION (PHOBIUS); SIGNAL_PEPTIDE_H_REGION (PHOBIUS); SignalP-noTM (SIGNALP_EUK); S…
Aqu2.1.41573_001	tcna_trycr ame: full=sialidase ame: full=major surface antigen ame: full=neuraminidase short=na	677	5	8.15742e-104	0.616	11	C:GO:0016020; F:GO:0016787; C:GO:0031225; F:GO:0052796; F:GO:0052795; F:GO:0052794; F:GO:0004308; P:GO:0009405; P:GO:0008152; C:GO:0005886; F:GO:0016798		IPR008972 (G3DSA:2.60.40.GENE3D); CYTOPLASMIC_DOMAIN (PHOBIUS); SIGNAL_PEPTIDE_N_REGION (PHOBIUS); NON_CYTOPLASMIC_DOMAIN (PHOBIUS); TRANSMEMBRANE (PHOBIUS); SIGNAL_PEPTIDE_H_REGION (PHOBIUS); SIGNAL_PEPTIDE (PHOBIUS); SIGNAL_PEPTIDE_C_REGION (PHOBIUS); SignalP-noTM (SIGNALP_EUK); IPR008972 (SUPERFAMILY); TMhelix (TMHMM)
Aqu2.1.41743_001	zinc finger mym-type protein 1-like	72	20	8.91381e-26	0.793	2	F:GO:0003676; F:GO:0046983	-	IPR008906 (PFAM); PTHR11697 (PANTHER); PTHR11697:SF80 (PANTHER)
Aqu2.1.41812_001	tyrosine-protein kinase btk29a	751	20	0	0.7225	5	F:GO:0004713; P:GO:0018108; F:GO:0005524; F:GO:0005515; P:GO:0035556	EC:2.7.10.0	IPR001245 (PRINTS); IPR000980 (PRINTS); IPR020635 (SMART); IPR001849 (SMART); IPR000980 (SMART); IPR001452 (SMART); IPR001562 (SMART); IPR001849 (PFAM); IPR001562 (PFAM); G3DSA:3.30.200.20 (GENE3D); IPR001452 (PFAM); IPR011993 (G3DSA:2.30.29.GENE3D); G3DSA:1.10.510.10 (GENE3D); G3DSA:2.30.30.40 (GENE3D); IPR000980 (PFAM); IPR001245 (PFAM); IPR000980 (G3DSA:3.30.505.GENE3D); PTHR24418:SF65 (PANTHE…
Aqu2.1.41927_001	methionyl-trna synthetase	1895	20	0	0.664	7	C:GO:0005829; F:GO:0004825; P:GO:0006431; P:GO:0006555; P:GO:0038032; F:GO:0005515; F:GO:0005524	EC:6.1.1.10	IPR000342 (PRINTS); IPR001478 (SMART); IPR016137 (SMART); IPR001478 (PFAM); IPR024066 (G3DSA:1.10.196.GENE3D); G3DSA:2.20.28.20 (GENE3D); IPR011993 (G3DSA:2.30.29.GENE3D); G3DSA:1.10.167.10 (GENE3D); IPR014729 (G3DSA:3.40.50.GENE3D); IPR014758 (TIGRFAM); G3DSA:1.10.730.10 (GENE3D); G3DSA:2.30.42.10 (GENE3D); IPR000342 (PFAM); IPR015413 (PFAM); PTHR11946 (PANTHER); PTHR11946:SF13 (PANTHER); IPR016…
Aqu2.1.41939_001	protein fam184a isoform x1	944	20	4.50326e-30	0.46	3	F:GO:0003674; P:GO:0008150; C:GO:0005575		Coil (COILS); Coil (COILS); Coil (COILS); Coil (COILS); Coil (COILS); Coil (COILS); Coil (COILS); Coil (COILS); Coil (COILS); Coil (COILS); Coil (COILS); Coil (COILS); Coil (COILS); Coil (COILS); Coil (COILS); Coil (COILS); Coil (COILS); PTHR32144 (PANTHER)
Aqu2.1.41968_001	PREDICTED: hypothetical protein LOC100638610 [Amphimedon queenslandica]	1039	5	7.79794e-20	0.418	0	-		IPR006626 (SMART); CYTOPLASMIC_DOMAIN (PHOBIUS); NON_CYTOPLASMIC_DOMAIN (PHOBIUS); SIGNAL_PEPTIDE_N_REGION (PHOBIUS); SIGNAL_PEPTIDE_C_REGION (PHOBIUS); NON_CYTOPLASMIC_DOMAIN (PHOBIUS); TRANSMEMBRANE (PHOBIUS); SIGNAL_PEPTIDE_H_REGION (PHOBIUS); TRANSMEMBRANE (PHOBIUS); SIGNAL_PEPTIDE (PHOBIUS); CYTOPLASMIC_DOMAIN (PHOBIUS); TRANSMEMBRANE (PHOBIUS); SignalP-noTM (SIGNALP_EUK); SignalP-TM (SIGNAL…
Aqu2.1.42013_001	protein	1311	8	1.31145e-26	0.42	0	-		IPR003368 (TIGRFAM); TRANSMEMBRANE (PHOBIUS); TRANSMEMBRANE (PHOBIUS); NON_CYTOPLASMIC_DOMAIN (PHOBIUS); CYTOPLASMIC_DOMAIN (PHOBIUS); TRANSMEMBRANE (PHOBIUS); CYTOPLASMIC_DOMAIN (PHOBIUS); CYTOPLASMIC_DOMAIN (PHOBIUS); CYTOPLASMIC_DOMAIN (PHOBIUS); TRANSMEMBRANE (PHOBIUS); SIGNAL_PEPTIDE_C_REGION (PHOBIUS); TRANSMEMBRANE (PHOBIUS); SIGNAL_PEPTIDE (PHOBIUS); NON_CYTOPLASMIC_DOMAIN (PHOBIUS); TRAN…
Aqu2.1.42041_001	dual specificity protein kinase shkc-like	835	20	5.64284e-117	0.4925	4	F:GO:0005524; P:GO:0006468; F:GO:0004672; F:GO:0005515	-	Coil (COILS); IPR000719 (PFAM); G3DSA:3.30.200.20 (GENE3D); G3DSA:1.10.510.10 (GENE3D); IPR015915 (G3DSA:2.120.10.GENE3D); PF13418 (PFAM); PTHR23244 (PANTHER); IPR000719 (PROSITE_PROFILES); SSF117281 (SUPERFAMILY); IPR011009 (SUPERFAMILY)
Aqu2.1.42051_001	---NA---	25	0			0	-		TMhelix (TMHMM)
Aqu2.1.42089_001	morn repeat-containing protein 1	579	20	0	0.597	4	F:GO:0008239; P:GO:0006508; F:GO:0008235; F:GO:0016805		IPR003409 (SMART); G3DSA:2.20.110.10 (GENE3D); IPR003409 (PFAM); PTHR23084 (PANTHER); PTHR23084:SF56 (PANTHER); SSF82185 (SUPERFAMILY)
Aqu2.1.42090_001	tetratricopeptide repeat protein mitochondrial isoform x1	352	20	6.74828e-20	0.4635	1	F:GO:0005515		IPR019734 (SMART); IPR011990 (G3DSA:1.25.40.GENE3D); PF13424 (PFAM); IPR019734 (PFAM); PTHR13143 (PANTHER); IPR019734 (PROSITE_PROFILES); IPR013026 (PROSITE_PROFILES); IPR019734 (PROSITE_PROFILES); IPR013026 (PROSITE_PROFILES); IPR019734 (PROSITE_PROFILES); SSF48452 (SUPERFAMILY)
Aqu2.1.42116_001	transmembrane protein 106a	293	20	6.07899e-28	0.52	8	C:GO:0005765; C:GO:0005764; C:GO:0031902; F:GO:0003674; C:GO:0016021; C:GO:0016020; P:GO:0008150; C:GO:0005768		IPR009790 (PFAM); PTHR32042 (PANTHER); TRANSMEMBRANE (PHOBIUS); CYTOPLASMIC_DOMAIN (PHOBIUS); NON_CYTOPLASMIC_DOMAIN (PHOBIUS); TMhelix (TMHMM)
Aqu2.1.42130_001	transcription factor tfiiic complex subunit sfc9	117	11	8.64943e-21	0.510909	4	P:GO:0006468; F:GO:0005524; F:GO:0004674; P:GO:0009069	EC:2.7.11.0	IPR024764 (PFAM)
Aqu2.1.42176_001	integrator complex subunit 4-like	157	17	4.37022e-48	0.642941	5	P:GO:0009199; P:GO:0009119; F:GO:0016787; P:GO:0009165; P:GO:0009259	-	no IPS match
Aqu2.1.42189_001	achain crystal structure of engineered northeast structural genomics consortium target	840	20	1.21043e-16	0.5435	4	F:GO:0005515; F:GO:0005524; P:GO:0006468; F:GO:0004672		IPR002110 (SMART); G3DSA:1.10.510.10 (GENE3D); IPR020683 (G3DSA:1.25.40.GENE3D); IPR020683 (G3DSA:1.25.40.GENE3D); PF13857 (PFAM); PF13637 (PFAM); PTHR24193 (PANTHER); IPR000719 (PROSITE_PROFILES); IPR020683 (PROSITE_PROFILES); IPR002110 (PROSITE_PROFILES); IPR011009 (SUPERFAMILY); IPR020683 (SUPERFAMILY)
Aqu2.1.42191_001	insulin-like growth factor 2 mrna-binding protein 1-like	714	20	4.14063e-74	0.576	2	F:GO:0003723; F:GO:0000166		IPR000504 (SMART); IPR004087 (SMART); IPR000504 (PFAM); G3DSA:3.30.1370.10 (GENE3D); IPR012677 (G3DSA:3.30.70.GENE3D); IPR004088 (PFAM); G3DSA:3.30.1370.10 (GENE3D); IPR012677 (G3DSA:3.30.70.GENE3D); PF14259 (PFAM); PTHR10288:SF59 (PANTHER); PTHR10288 (PANTHER); IPR004088 (PROSITE_PROFILES); IPR004088 (PROSITE_PROFILES); IPR000504 (PROSITE_PROFILES); SSF54791 (SUPERFAMILY); SSF54791 (SUPERFAMILY)…
Aqu2.1.42211_001	---NA---	704	0			0	-		IPR001849 (SMART); IPR011993 (G3DSA:2.30.29.GENE3D); IPR001849 (PFAM); IPR001849 (PROSITE_PROFILES); SSF50729 (SUPERFAMILY)
Aqu2.1.42518_001	---NA---	39	0			0	-		no IPS match
Aqu2.1.42554_001	ferritin 1	184	20	9.77286e-133	0.8235	3	P:GO:0006879; F:GO:0008199; P:GO:0006826	-	IPR008331 (PFAM); IPR012347 (G3DSA:1.20.1260.GENE3D); IPR001519 (PANTHER); IPR014034 (PROSITE_PATTERNS); IPR009040 (PROSITE_PROFILES); IPR009078 (SUPERFAMILY)
Aqu2.1.42608_001	upf0553 protein c9orf64 homolog	348	20	0	0.618	0	-		IPR019438 (PFAM); IPR019438 (PANTHER); PTHR21314:SF0 (PANTHER); SIGNAL_PEPTIDE (PHOBIUS); NON_CYTOPLASMIC_DOMAIN (PHOBIUS); SIGNAL_PEPTIDE_H_REGION (PHOBIUS); SIGNAL_PEPTIDE_C_REGION (PHOBIUS); SIGNAL_PEPTIDE_N_REGION (PHOBIUS)
Aqu2.1.42636_001	tetratricopeptide repeat protein 7b	768	20	0	0.481	1	F:GO:0005515		IPR019734 (SMART); IPR011990 (G3DSA:1.25.40.GENE3D); IPR001440 (PFAM); IPR026900 (PTHR23083:PANTHER); PTHR23083 (PANTHER); TRANSMEMBRANE (PHOBIUS); CYTOPLASMIC_DOMAIN (PHOBIUS); NON_CYTOPLASMIC_DOMAIN (PHOBIUS); IPR019734 (PROSITE_PROFILES); IPR013026 (PROSITE_PROFILES); SSF48452 (SUPERFAMILY)
Aqu2.1.42637_001	tetratricopeptide repeat protein 7b-like	432	19	0	0.543684	5	P:GO:0009199; P:GO:0009119; F:GO:0016787; P:GO:0009165; P:GO:0009259	-	IPR014716 (G3DSA:3.90.215.GENE3D); SIGNAL_PEPTIDE_N_REGION (PHOBIUS); SIGNAL_PEPTIDE_C_REGION (PHOBIUS); NON_CYTOPLASMIC_DOMAIN (PHOBIUS); SIGNAL_PEPTIDE_H_REGION (PHOBIUS); SIGNAL_PEPTIDE (PHOBIUS); SignalP-noTM (SIGNALP_GRAM_NEGATIVE); SignalP-TM (SIGNALP_GRAM_POSITIVE); SignalP-noTM (SIGNALP_EUK); IPR002181 (SUPERFAMILY)
Aqu2.1.42709_001	uncharacterized protein partial	3460	20	0	0.4305	1	F:GO:0005515		IPR000436 (SMART); G3DSA:2.10.70.10 (GENE3D); IPR000436 (PFAM); PF14704 (PFAM); PTHR16897:SF0 (PANTHER); PTHR16897 (PANTHER); IPR013032 (PROSITE_PATTERNS); IPR013032 (PROSITE_PATTERNS); SIGNAL_PEPTIDE_H_REGION (PHOBIUS); NON_CYTOPLASMIC_DOMAIN (PHOBIUS); SIGNAL_PEPTIDE (PHOBIUS); SIGNAL_PEPTIDE_N_REGION (PHOBIUS); SIGNAL_PEPTIDE_C_REGION (PHOBIUS); IPR003961 (PROSITE_PROFILES); IPR003961 (PROSITE…
Aqu2.1.43104_001	---NA---	96	0			0	-		no IPS match
Aqu2.1.43119_001	---NA---	84	0			0	-		no IPS match
Aqu2.1.43271_001	f-box wd repeat-containing protein 7 isoform x5	578	20	0	0.767	5	P:GO:0001525; F:GO:0003677; P:GO:0045746; P:GO:0006281; F:GO:0005515	-	IPR020472 (PRINTS); IPR001810 (SMART); IPR001680 (SMART); IPR015943 (G3DSA:2.130.10.GENE3D); G3DSA:1.20.1280.50 (GENE3D); PF12937 (PFAM); IPR001680 (PFAM); IPR015943 (G3DSA:2.130.10.GENE3D); PTHR22844 (PANTHER); PTHR22844:SF95 (PANTHER); IPR019775 (PROSITE_PATTERNS); IPR019775 (PROSITE_PATTERNS); IPR019775 (PROSITE_PATTERNS); IPR019775 (PROSITE_PATTERNS); IPR019775 (PROSITE_PATTERNS); IPR001680 (…
Aqu2.1.43272_001	---NA---	54	0			0	-		SIGNAL_PEPTIDE_C_REGION (PHOBIUS); NON_CYTOPLASMIC_DOMAIN (PHOBIUS); SIGNAL_PEPTIDE (PHOBIUS); SIGNAL_PEPTIDE_H_REGION (PHOBIUS); SIGNAL_PEPTIDE_N_REGION (PHOBIUS); SignalP-TM (SIGNALP_GRAM_POSITIVE)
Aqu2.1.43331_001	---NA---	64	0			0	-		no IPS match
Aqu2.1.43364_001	---NA---	73	0			0	-		no IPS match
Aqu2.1.43431_001	golgi to er traffic protein 4 homolog	369	20	5.5751e-46	0.503	6	C:GO:0005737; C:GO:0071818; P:GO:0071816; C:GO:0005829; P:GO:0006810; F:GO:0003674		IPR007317 (PFAM); IPR007317 (PANTHER); PTHR12875:SF0 (PANTHER)
Aqu2.1.43455_001	ras-associating and dilute domain-containing protein	1501	20	1.77376e-42	0.464	2	P:GO:0007165; F:GO:0005515	-	Coil (COILS); IPR018444 (PFAM); IPR000159 (PFAM); G3DSA:2.30.42.10 (GENE3D); G3DSA:3.10.20.90 (GENE3D); PTHR16027 (PANTHER); NON_CYTOPLASMIC_DOMAIN (PHOBIUS); CYTOPLASMIC_DOMAIN (PHOBIUS); TRANSMEMBRANE (PHOBIUS); IPR001478 (PROSITE_PROFILES); IPR000159 (PROSITE_PROFILES); IPR002710 (PROSITE_PROFILES); IPR001478 (SUPERFAMILY); SSF54236 (SUPERFAMILY); IPR008984 (SUPERFAMILY)
Aqu2.1.43457_001	---NA---	55	0			0	-		no IPS match
Aqu2.1.43460_001	mkl myocardin-like protein 2	921	20	5.5434e-26	0.4865	5	P:GO:0009987; P:GO:0048513; P:GO:0010467; P:GO:0061061; F:GO:0003676	-	IPR003034 (SMART); IPR004018 (SMART); IPR003034 (G3DSA:1.10.720.GENE3D); IPR003034 (PFAM); PTHR22793 (PANTHER); IPR004018 (PROSITE_PROFILES); IPR003034 (PROSITE_PROFILES); IPR004018 (PROSITE_PROFILES); IPR004018 (PROSITE_PROFILES); SSF68906 (SUPERFAMILY)
Aqu2.1.43509_001	glucose-induced degradation protein 4 homolog	206	20	7.59939e-136	0.7555	3	F:GO:0003674; P:GO:0008150; C:GO:0005575		IPR018618 (PFAM); PTHR32279 (PANTHER); PTHR32279:SF0 (PANTHER)
Aqu2.1.43549_001	uncharacterized protein loc102804939	4144	20	0	0.4825	5	F:GO:0005543; C:GO:0005622; F:GO:0005509; F:GO:0008270; F:GO:0005515	-	Coil (COILS); IPR001881 (SMART); G3DSA:2.10.25.10 (GENE3D); IPR013083 (G3DSA:3.30.40.GENE3D); PTHR24103 (PANTHER); PTHR24103:SF134 (PANTHER); IPR018097 (PROSITE_PATTERNS); IPR000315 (PROSITE_PROFILES); SSF57196 (SUPERFAMILY); IPR003961 (SUPERFAMILY)
Aqu2.1.43588_001	muscleblind-like protein 2 isoform x1	359	20	2.88229e-126	0.531	1	F:GO:0046872		IPR000571 (SMART); IPR000571 (G3DSA:4.10.1000.GENE3D); PTHR12675:SF0 (PANTHER); PTHR12675 (PANTHER); IPR000571 (PROSITE_PROFILES); IPR000571 (PROSITE_PROFILES); IPR000571 (PROSITE_PROFILES); IPR000571 (PROSITE_PROFILES)
Aqu2.1.43595_001	histone deacetylase complex subunit sap130	768	20	0	0.4875	2	C:GO:0005681; P:GO:0006396	-	IPR024137 (PANTHER); PTHR13497:SF0 (PANTHER)
Aqu2.1.43607_001	26s proteasome non-atpase regulatory subunit 1-like	1059	20	0	0.718	5	P:GO:0042176; C:GO:0000502; P:GO:0050790; F:GO:0030234; F:GO:0005488	-	IPR016642 (PIRSF); IPR011989 (G3DSA:1.25.10.GENE3D); PF13646 (PFAM); IPR002015 (PFAM); PTHR10943:SF2 (PANTHER); PTHR10943 (PANTHER); TRANSMEMBRANE (PHOBIUS); NON_CYTOPLASMIC_DOMAIN (PHOBIUS); CYTOPLASMIC_DOMAIN (PHOBIUS); IPR016024 (SUPERFAMILY); TMhelix (TMHMM)
Aqu2.1.43632_001	---NA---	73	0			0	-		NON_CYTOPLASMIC_DOMAIN (PHOBIUS); TRANSMEMBRANE (PHOBIUS); CYTOPLASMIC_DOMAIN (PHOBIUS); TMhelix (TMHMM)
Aqu2.1.43713_001	major facilitator superfamily domain-containing protein 1-like	486	20	7.92685e-162	0.607	2	P:GO:0055085; C:GO:0016021	-	G3DSA:1.20.1250.20 (GENE3D); IPR011701 (PFAM); PTHR24003 (PANTHER); PTHR24003:SF84 (PANTHER); TRANSMEMBRANE (PHOBIUS); TRANSMEMBRANE (PHOBIUS); NON_CYTOPLASMIC_DOMAIN (PHOBIUS); NON_CYTOPLASMIC_DOMAIN (PHOBIUS); TRANSMEMBRANE (PHOBIUS); TRANSMEMBRANE (PHOBIUS); CYTOPLASMIC_DOMAIN (PHOBIUS); NON_CYTOPLASMIC_DOMAIN (PHOBIUS); TRANSMEMBRANE (PHOBIUS); CYTOPLASMIC_DOMAIN (PHOBIUS); TRANSMEMBRANE (PHO…
Aqu2.1.43775_001	NFKB2	1095	20	0	0.672	33	F:GO:0003700; P:GO:0045892; P:GO:0006357; P:GO:0044710; P:GO:0034138; P:GO:0032481; P:GO:0034142; F:GO:0003690; C:GO:0033257; C:GO:0005829; P:GO:0034162; C:GO:0005654; P:GO:0034166; P:GO:0006979; F:GO:0003713; P:GO:0038124; P:GO:0034146; P:GO:0009605; P:GO:0002755; P:GO:0046688; P:GO:0051092; P:GO:0035666; P:GO:0034134; P:GO:0045893; P:GO:0038123; F:GO:0000976; P:GO:0043066; C:GO:0005730; F:GO:00…	-	IPR000451 (PRINTS); IPR002909 (SMART); IPR002110 (SMART); IPR002110 (PFAM); IPR011029 (G3DSA:1.10.533.GENE3D); IPR013783 (G3DSA:2.60.40.GENE3D); IPR011539 (G3DSA:2.60.40.GENE3D); IPR011539 (PFAM); IPR020683 (G3DSA:1.25.40.GENE3D); IPR020683 (PFAM); IPR000488 (PFAM); PTHR24169:SF5 (PANTHER); PTHR24169 (PANTHER); IPR000451 (PROSITE_PATTERNS); IPR020683 (PROSITE_PROFILES); IPR002110 (PROSITE_PROFILE…
Aqu2.1.43810_001	plexin-a4 isoform x1	1878	20	0	0.5085	8	P:GO:0009653; C:GO:0016021; C:GO:0005622; P:GO:0007165; P:GO:0044767; P:GO:0007399; F:GO:0004872; F:GO:0005515	-	IPR002909 (SMART); IPR016201 (SMART); IPR002909 (PFAM); IPR013783 (G3DSA:2.60.40.GENE3D); G3DSA:3.10.20.90 (GENE3D); IPR013548 (PFAM); G3DSA:3.30.1680.10 (GENE3D); IPR002165 (PFAM); PTHR22625 (PANTHER); CYTOPLASMIC_DOMAIN (PHOBIUS); SIGNAL_PEPTIDE_H_REGION (PHOBIUS); TRANSMEMBRANE (PHOBIUS); SIGNAL_PEPTIDE_N_REGION (PHOBIUS); NON_CYTOPLASMIC_DOMAIN (PHOBIUS); SIGNAL_PEPTIDE_C_REGION (PHOBIUS); SI…
Aqu2.1.43811_001	deoxyribonuclease gamma	309	20	0	0.58	2	P:GO:0006308; F:GO:0004536	-	IPR016202 (PRINTS); IPR016202 (SMART); IPR005135 (G3DSA:3.60.10.GENE3D); IPR016202 (PANTHER); TRANSMEMBRANE (PHOBIUS); SIGNAL_PEPTIDE_H_REGION (PHOBIUS); NON_CYTOPLASMIC_DOMAIN (PHOBIUS); SIGNAL_PEPTIDE_N_REGION (PHOBIUS); SIGNAL_PEPTIDE_C_REGION (PHOBIUS); SIGNAL_PEPTIDE (PHOBIUS); CYTOPLASMIC_DOMAIN (PHOBIUS); SignalP-noTM (SIGNALP_EUK); IPR005135 (SUPERFAMILY); TMhelix (TMHMM); TMhelix (TMHMM)
Aqu2.1.43881_001	peptidylprolyl isomerase	180	20	6.28317e-91	0.876	3	P:GO:0006457; P:GO:0000413; F:GO:0003755	EC:5.2.1.8	IPR002130 (PRINTS); IPR024936 (PIRSF); IPR002130 (PFAM); G3DSA:2.40.100.10 (GENE3D); PTHR11071 (PANTHER); IPR020892 (PROSITE_PATTERNS); IPR002130 (PROSITE_PROFILES); IPR002130 (SUPERFAMILY)
Aqu2.1.43907_001	cellulase (glycosyl hydrolase family 5) subfamily protein	819	20	0	0.577	6	F:GO:0004553; P:GO:1901575; P:GO:0044237; P:GO:0005975; P:GO:0006629; F:GO:0016298	EC:3.2.1.0	IPR013831 (G3DSA:3.40.50.GENE3D); IPR001547 (PFAM); IPR013781 (G3DSA:3.20.20.GENE3D); IPR001087 (PFAM); PTHR31308 (PANTHER); PTHR31308:SF0 (PANTHER); IPR008265 (PROSITE_PATTERNS); SIGNAL_PEPTIDE_N_REGION (PHOBIUS); SIGNAL_PEPTIDE_C_REGION (PHOBIUS); SIGNAL_PEPTIDE_H_REGION (PHOBIUS); NON_CYTOPLASMIC_DOMAIN (PHOBIUS); SIGNAL_PEPTIDE (PHOBIUS); PS51257 (PROSITE_PROFILES); SignalP-TM (SIGNALP_GRAM_P…
Aqu2.1.43908_001	gamma-aminobutyric acid type b receptor subunit 2-like	763	20	7.6656e-171	0.494	3	C:GO:0016021; P:GO:0007186; F:GO:0004965		IPR002455 (PRINTS); IPR000337 (PRINTS); IPR001828 (PFAM); G3DSA:3.40.50.2300 (GENE3D); G3DSA:3.40.50.2300 (GENE3D); IPR017978 (PFAM); PTHR10519 (PANTHER); TRANSMEMBRANE (PHOBIUS); CYTOPLASMIC_DOMAIN (PHOBIUS); SIGNAL_PEPTIDE_N_REGION (PHOBIUS); SIGNAL_PEPTIDE (PHOBIUS); TRANSMEMBRANE (PHOBIUS); CYTOPLASMIC_DOMAIN (PHOBIUS); SIGNAL_PEPTIDE_H_REGION (PHOBIUS); NON_CYTOPLASMIC_DOMAIN (PHOBIUS); CYTO…
Aqu2.1.43936_001	gamma-secretase subunit aph-1	235	20	6.27177e-166	0.6115	3	P:GO:0043085; C:GO:0016021; P:GO:0016485	-	IPR009294 (PFAM); IPR009294 (PANTHER); TRANSMEMBRANE (PHOBIUS); TRANSMEMBRANE (PHOBIUS); NON_CYTOPLASMIC_DOMAIN (PHOBIUS); TRANSMEMBRANE (PHOBIUS); NON_CYTOPLASMIC_DOMAIN (PHOBIUS); CYTOPLASMIC_DOMAIN (PHOBIUS); TRANSMEMBRANE (PHOBIUS); NON_CYTOPLASMIC_DOMAIN (PHOBIUS); TRANSMEMBRANE (PHOBIUS); CYTOPLASMIC_DOMAIN (PHOBIUS); TRANSMEMBRANE (PHOBIUS); CYTOPLASMIC_DOMAIN (PHOBIUS); CYTOPLASMIC_DOMAIN…
Aqu2.1.43952_001	---NA---	357	0			1	F:GO:0005515		IPR001452 (SMART); IPR001452 (PFAM); G3DSA:2.30.30.40 (GENE3D); IPR001452 (PROSITE_PROFILES); IPR001452 (SUPERFAMILY)
Aqu2.1.43975_001	latrophilin cirl-like isoform 1	1677	20	0	0.602	7	P:GO:0006468; F:GO:0004674; F:GO:0005524; P:GO:0009069; C:GO:0016021; F:GO:0004930; P:GO:0007218	EC:2.7.11.0	IPR000832 (PRINTS); IPR000203 (SMART); IPR002290 (SMART); IPR000832 (PFAM); IPR000203 (PFAM); IPR000719 (PFAM); G3DSA:3.30.200.20 (GENE3D); G3DSA:1.10.510.10 (GENE3D); PTHR12011 (PANTHER); IPR008271 (PROSITE_PATTERNS); CYTOPLASMIC_DOMAIN (PHOBIUS); NON_CYTOPLASMIC_DOMAIN (PHOBIUS); TRANSMEMBRANE (PHOBIUS); CYTOPLASMIC_DOMAIN (PHOBIUS); CYTOPLASMIC_DOMAIN (PHOBIUS); NON_CYTOPLASMIC_DOMAIN (PHOBIUS…
Aqu2.1.43981_001	disks large homolog 5-like isoform x2	1435	20	5.66475e-15	0.424	1	F:GO:0005515		Coil (COILS); Coil (COILS); Coil (COILS); Coil (COILS); Coil (COILS); Coil (COILS); Coil (COILS); IPR001478 (SMART); IPR008145 (SMART); IPR001452 (SMART); IPR001478 (PFAM); G3DSA:2.30.42.10 (GENE3D); G3DSA:2.30.30.40 (GENE3D); G3DSA:3.40.50.300 (GENE3D); PTHR13865 (PANTHER); IPR001478 (PROSITE_PROFILES); IPR001478 (SUPERFAMILY); IPR001452 (SUPERFAMILY)
Aqu2.1.44009_001	sorbin and sh3 domain-containing protein 2 isoform x3	890	20	0	0.6545	7	C:GO:0005737; F:GO:0005200; F:GO:0008307; F:GO:0019904; C:GO:0005886; C:GO:0015629; F:GO:0008093	-	PR00499 (PRINTS); IPR001452 (PRINTS); IPR001478 (SMART); IPR001452 (SMART); IPR001452 (PFAM); G3DSA:2.30.30.40 (GENE3D); IPR001478 (PFAM); G3DSA:2.30.42.10 (GENE3D); G3DSA:2.30.30.40 (GENE3D); PTHR10661 (PANTHER); IPR001452 (PROSITE_PROFILES); IPR001478 (PROSITE_PROFILES); IPR001452 (PROSITE_PROFILES); IPR001452 (SUPERFAMILY); IPR001478 (SUPERFAMILY); IPR001452 (SUPERFAMILY)
Aqu2.1.44012_001	gtp-binding protein yptc1	818	20	0	0.6965	15	F:GO:0003777; F:GO:0008017; C:GO:0005874; P:GO:0007264; F:GO:0005524; P:GO:0007018; C:GO:0005871; F:GO:0005525; C:GO:0045298; F:GO:0005509; P:GO:0006184; C:GO:0016020; P:GO:0006913; F:GO:0003924; P:GO:0006886	-	Coil (COILS); IPR001806 (PRINTS); IPR002048 (SMART); IPR020849 (SMART); IPR003579 (SMART); IPR002041 (SMART); IPR003578 (SMART); IPR024156 (SMART); IPR002048 (PFAM); IPR001806 (PFAM); IPR011992 (G3DSA:1.10.238.GENE3D); IPR011992 (G3DSA:1.10.238.GENE3D); IPR005225 (TIGRFAM); G3DSA:3.40.50.300 (GENE3D); PTHR24073 (PANTHER); IPR018247 (PROSITE_PATTERNS); IPR002048 (PROSITE_PROFILES); PS51419 (PROSIT…
Aqu2.1.44020_001	actin bundling protein	276	20	0	0.7585	1	F:GO:0003779	-	IPR001715 (SMART); IPR001715 (G3DSA:1.10.418.GENE3D); IPR001715 (G3DSA:1.10.418.GENE3D); IPR001715 (PFAM); PTHR19961 (PANTHER); IPR001589 (PROSITE_PATTERNS); IPR001715 (PROSITE_PROFILES); IPR001715 (PROSITE_PROFILES); IPR001715 (SUPERFAMILY)
Aqu2.1.44038_001	tpr and ankyrin repeat-containing protein 1	2931	20	0	0.565	3	F:GO:0005524; F:GO:0016787; F:GO:0005515	-	Coil (COILS); IPR002110 (SMART); PF13414 (PFAM); IPR020683 (G3DSA:1.25.40.GENE3D); IPR014017 (PFAM); IPR011990 (G3DSA:1.25.40.GENE3D); IPR014016 (PFAM); G3DSA:3.40.50.300 (GENE3D); IPR026654 (PANTHER); PTHR21529:SF0 (PANTHER); NON_CYTOPLASMIC_DOMAIN (PHOBIUS); CYTOPLASMIC_DOMAIN (PHOBIUS); TRANSMEMBRANE (PHOBIUS); IPR014016 (PROSITE_PROFILES); IPR027417 (SUPERFAMILY); SSF48452 (SUPERFAMILY); IPR0…
Aqu2.1.44039_001	polyubiquitin-c- partial	251	4	2.90291e-19	0.665	1	P:GO:0007165		IPR011029 (G3DSA:1.10.533.GENE3D)
Aqu2.1.44051_001	suppressor of cytokine signaling 6	310	20	0	0.741	3	P:GO:0035556; F:GO:0005515; P:GO:0040008	-	IPR000980 (SMART); IPR001496 (SMART); IPR001496 (PFAM); IPR000980 (G3DSA:3.30.505.GENE3D); IPR000980 (PFAM); IPR028421 (PTHR10385:PANTHER); IPR028413 (PANTHER); IPR001496 (PROSITE_PROFILES); IPR000980 (PROSITE_PROFILES); SSF158235 (SUPERFAMILY); SSF55550 (SUPERFAMILY)
Aqu2.1.44097_001	leucine-rich repeat serine threonine-protein kinase 1	2853	20	0	0.4845	7	P:GO:0007264; F:GO:0005525; F:GO:0005515; P:GO:0006468; F:GO:0005524; C:GO:0005622; F:GO:0004674		IPR001806 (PRINTS); IPR003591 (SMART); SM00364 (SMART); IPR002110 (SMART); IPR002290 (SMART); G3DSA:3.80.10.10 (GENE3D); IPR002110 (PFAM); G3DSA:3.30.200.20 (GENE3D); PF13504 (PFAM); G3DSA:3.40.50.300 (GENE3D); IPR013684 (PFAM); IPR001611 (PFAM); IPR000719 (PFAM); IPR020683 (PFAM); G3DSA:3.30.70.1390 (GENE3D); IPR020683 (G3DSA:1.25.40.GENE3D); IPR025875 (PFAM); G3DSA:1.10.510.10 (GENE3D); IPR0206…
Aqu2.1.44121_001	start domain-containing protein	217	20	4.89187e-67	0.5715	1	F:GO:0008289		IPR002913 (PFAM); IPR023393 (G3DSA:3.30.530.GENE3D); PTHR19308 (PANTHER); IPR002913 (PROSITE_PROFILES); SSF55961 (SUPERFAMILY)
Aqu2.1.44137_001	mannose-binding protein	649	7	4.22182e-31	0.365714	1	C:GO:0005576		IPR004153 (PFAM); SIGNAL_PEPTIDE_N_REGION (PHOBIUS); SIGNAL_PEPTIDE_C_REGION (PHOBIUS); SIGNAL_PEPTIDE (PHOBIUS); NON_CYTOPLASMIC_DOMAIN (PHOBIUS); SIGNAL_PEPTIDE_H_REGION (PHOBIUS); SignalP-TM (SIGNALP_GRAM_POSITIVE); SignalP-noTM (SIGNALP_EUK); SignalP-noTM (SIGNALP_GRAM_NEGATIVE)
Aqu2.1.44149_001	netrin receptor unc5c isoform x1	1490	20	0	0.4645	0	-		IPR000906 (PFAM); IPR000906 (PROSITE_PROFILES)
Aqu2.1.44184_001	---NA---	865	0			0	-		no IPS match
Aqu2.1.44365_001	reverse transcriptase	125	20	3.1398e-13	0.6275	3	P:GO:0006278; F:GO:0003964; F:GO:0003723	-	G3DSA:3.30.70.270 (GENE3D); IPR000477 (PFAM); IPR000477 (PROSITE_PROFILES); SSF56672 (SUPERFAMILY)
Aqu2.1.44417_001	---NA---	112	0			0	-		no IPS match
Aqu2.1.44668_001	zinc finger protein 862-like	129	20	7.78601e-37	0.6315	0	-		CYTOPLASMIC_DOMAIN (PHOBIUS); TRANSMEMBRANE (PHOBIUS); NON_CYTOPLASMIC_DOMAIN (PHOBIUS); TMhelix (TMHMM)
Aqu2.1.44693_001	PREDICTED: hypothetical protein LOC100636160 [Amphimedon queenslandica]	1429	2	0	0.81	0	-		IPR000884 (SMART); G3DSA:2.20.100.10 (GENE3D); IPR000884 (PFAM); PTHR13723 (PANTHER); SIGNAL_PEPTIDE_C_REGION (PHOBIUS); NON_CYTOPLASMIC_DOMAIN (PHOBIUS); SIGNAL_PEPTIDE (PHOBIUS); SIGNAL_PEPTIDE_N_REGION (PHOBIUS); SIGNAL_PEPTIDE_H_REGION (PHOBIUS); IPR000884 (PROSITE_PROFILES); SignalP-noTM (SIGNALP_GRAM_NEGATIVE); SignalP-noTM (SIGNALP_EUK); SignalP-TM (SIGNALP_GRAM_POSITIVE); IPR000884 (SUPER…
