# Supplementary material for: Landscape of histone modifications in a sponge reveals the origin of animal cis-regulatory complexity
Source: eLife. 2017 Apr 11;6:e22194. doi: 10.7554/eLife.22194 (PMC5429095; doi:10.7554/eLife.22194)
Supplement: Figure 6—source data 3. — DOI: http://dx.doi.org/10.7554/eLife.22194.031 [file elife-22194-fig6-data3.xlsx]

## Sheet: Figure 6-Source Data 3
Figure 6-source data 3. Functional annotation of nearest neighbors genes of the larva predicted activated enhancer-like elements.
Seq. Name	Seq. Description	Seq. Length	#Hits	min. eValue	mean Similarity	#GOs	GOs	Enzyme Codes	InterProScan
Aqu2.1.00359_001	receptor-type tyrosine-protein phosphatase s	221	20	2.48342e-09	0.4395	5	P:GO:0009987; P:GO:0048731; P:GO:0044767; P:GO:0009653; F:GO:0005515	-	IPR003961 (SMART); IPR003961 (PFAM); IPR013783 (G3DSA:2.60.40.GENE3D); IPR013783 (G3DSA:2.60.40.GENE3D); PTHR10489 (PANTHER); IPR003961 (PROSITE_PROFILES); IPR003961 (PROSITE_PROFILES); IPR003961 (SUPERFAMILY)
Aqu2.1.00559_001	PREDICTED: hypothetical protein LOC100635527 [Amphimedon queenslandica]	122	1	1.19398e-05	0.48	0	-		no IPS match
Aqu2.1.00807_001	---NA---	63	0			0	-		NON_CYTOPLASMIC_DOMAIN (PHOBIUS); SIGNAL_PEPTIDE_H_REGION (PHOBIUS); CYTOPLASMIC_DOMAIN (PHOBIUS); SIGNAL_PEPTIDE_N_REGION (PHOBIUS); TRANSMEMBRANE (PHOBIUS); SIGNAL_PEPTIDE (PHOBIUS); SIGNAL_PEPTIDE_C_REGION (PHOBIUS); TMhelix (TMHMM); TMhelix (TMHMM)
Aqu2.1.01313_001	rna-directed dna polymerase from mobile element jockey-like	292	20	4.33061e-36	0.479	1	F:GO:0003824	-	PF14529 (PFAM); IPR005135 (G3DSA:3.60.10.GENE3D); PTHR19446 (PANTHER); PTHR19446:SF213 (PANTHER); IPR005135 (SUPERFAMILY)
Aqu2.1.01341_001	uncharacterized protein loc102800480	243	20	1.96737e-47	0.5945	5	F:GO:0003676; P:GO:0015074; F:GO:0003677; P:GO:0008150; C:GO:0005575		no IPS match
Aqu2.1.01351_001	---NA---	132	0			0	-		no IPS match
Aqu2.1.01411_001	ubiquitin carboxyl-terminal hydrolase 47	114	20	3.62642e-25	0.5505	21	F:GO:0008234; F:GO:0004221; P:GO:0006511; C:GO:0019005; P:GO:0010972; P:GO:0042493; F:GO:0071987; P:GO:0034644; P:GO:0035520; P:GO:0043154; P:GO:0006974; F:GO:0004843; P:GO:0030307; C:GO:0005737; P:GO:0006284; P:GO:0045892; F:GO:0005515; P:GO:0043066; F:GO:0016787; F:GO:0008233; P:GO:0006508		no IPS match
Aqu2.1.01757_001	---NA---	7	0			0	-		no IPS match
Aqu2.1.01836_001	uncharacterized	163	20	1.92774e-42	0.64	1	F:GO:0005488	-	PTHR10178:SF114 (PANTHER); PTHR10178 (PANTHER)
Aqu2.1.02007_001	---NA---	144	0			0	-		no IPS match
Aqu2.1.02117_001	polyphosphoinositide phosphatase- partial	110	17	2.41516e-12	0.651176	5	F:GO:0042578; P:GO:0044237; P:GO:0005975; P:GO:0071554; P:GO:0016043	-	IPR002013 (PFAM); CYTOPLASMIC_DOMAIN (PHOBIUS); TRANSMEMBRANE (PHOBIUS); NON_CYTOPLASMIC_DOMAIN (PHOBIUS); IPR002013 (PROSITE_PROFILES); TMhelix (TMHMM)
Aqu2.1.02432_001	---NA---	51	0			0	-		no IPS match
Aqu2.1.03075_001	jerky protein homolog- partial	233	20	1.8798e-39	0.681	4	F:GO:0003964; P:GO:0006278; F:GO:0003723; P:GO:0015074	EC:2.7.7.49	IPR006600 (PFAM); PTHR19303:SF64 (PANTHER); PTHR19303 (PANTHER); IPR006600 (PROSITE_PROFILES)
Aqu2.1.03076_001	uncharacterized protein - partial	71	6	1.91738e-39	0.976667	7	F:GO:0003964; P:GO:0006278; F:GO:0003723; F:GO:0004190; P:GO:0006508; F:GO:0008270; P:GO:0015074	EC:2.7.7.49; EC:3.4.23.0	no IPS match
Aqu2.1.03469_001	---NA---	50	0			0	-		no IPS match
Aqu2.1.03701_001	PREDICTED: hypothetical protein LOC100639246 [Amphimedon queenslandica]	190	1	2.09701e-06	0.64	0	-		no IPS match
Aqu2.1.03793_001	---NA---	78	0			0	-		no IPS match
Aqu2.1.04262_001	uncharacterized protein partial	93	20	1.17531e-32	0.6385	0	-		no IPS match
Aqu2.1.04611_001	PREDICTED: hypothetical protein LOC100632815, partial [Amphimedon queenslandica]	215	2	4.83039e-73	0.875	0	-		no IPS match
Aqu2.1.05174_001	protein lifeguard 1-like	126	3	4.09888e-08	0.6	0	-		no IPS match
Aqu2.1.05332_001	---NA---	70	0			0	-		no IPS match
Aqu2.1.05565_001	ankyrin repeat-containing protein	112	20	8.67127e-16	0.609	1	F:GO:0005515		IPR002110 (PRINTS); IPR002110 (SMART); IPR020683 (G3DSA:1.25.40.GENE3D); IPR020683 (G3DSA:1.25.40.GENE3D); IPR020683 (PFAM); PTHR24188 (PANTHER); IPR002110 (PROSITE_PROFILES); IPR020683 (PROSITE_PROFILES); IPR020683 (SUPERFAMILY)
Aqu2.1.05598_001	sacsin- partial	631	3	1.0299e-139	0.573333	2	F:GO:0016787; C:GO:0044424	-	G3DSA:3.80.10.10 (GENE3D); SSF52047 (SUPERFAMILY)
Aqu2.1.05680_001	transient receptor potential cation channel subfamily a member 1 homolog	261	20	4.43892e-86	0.5805	2	P:GO:0006810; F:GO:0005515	-	IPR002110 (SMART); IPR020683 (G3DSA:1.25.40.GENE3D); IPR020683 (PFAM); PTHR24197:SF10 (PANTHER); PTHR24197 (PANTHER); TRANSMEMBRANE (PHOBIUS); CYTOPLASMIC_DOMAIN (PHOBIUS); NON_CYTOPLASMIC_DOMAIN (PHOBIUS); IPR002110 (PROSITE_PROFILES); IPR002110 (PROSITE_PROFILES); IPR020683 (PROSITE_PROFILES); IPR020683 (SUPERFAMILY); TMhelix (TMHMM)
Aqu2.1.05795_001	---NA---	164	0			0	-		Coil (COILS)
Aqu2.1.06160_001	golgi-specific brefeldin a-resistance guanine nucleotide exchange factor 1	258	20	1.15963e-37	0.718	24	C:GO:0005802; C:GO:0000139; F:GO:0005515; C:GO:0005788; P:GO:0065008; P:GO:0006693; F:GO:0016853; C:GO:0005777; F:GO:0005044; C:GO:0005829; P:GO:0006633; C:GO:0005801; F:GO:0003677; P:GO:0032012; C:GO:0005795; F:GO:0005086; P:GO:0006892; P:GO:0006890; P:GO:0045893; C:GO:0005634; P:GO:0046903; P:GO:0048205; C:GO:0005739; P:GO:0043087	-	PTHR10663:SF8 (PANTHER); PTHR10663 (PANTHER)
Aqu2.1.06270_001	---NA---	65	0			0	-		NON_CYTOPLASMIC_DOMAIN (PHOBIUS); SIGNAL_PEPTIDE_N_REGION (PHOBIUS); SIGNAL_PEPTIDE_C_REGION (PHOBIUS); SIGNAL_PEPTIDE (PHOBIUS); SIGNAL_PEPTIDE_H_REGION (PHOBIUS)
Aqu2.1.06754_001	PREDICTED: hypothetical protein LOC100633990, partial [Amphimedon queenslandica]	178	4	7.27821e-58	0.76	0	-		Coil (COILS); Coil (COILS)
Aqu2.1.06811_001	uncharacterized protein loc100000534	625	20	4.69893e-62	0.466	2	F:GO:0046983; F:GO:0003676		Coil (COILS); Coil (COILS); IPR008906 (PFAM); PTHR23272 (PANTHER); IPR012337 (SUPERFAMILY)
Aqu2.1.06818_001	protein	740	5	1.30742e-33	0.39	0	-		IPR006626 (SMART); IPR012334 (G3DSA:2.160.20.GENE3D); SIGNAL_PEPTIDE_C_REGION (PHOBIUS); NON_CYTOPLASMIC_DOMAIN (PHOBIUS); SIGNAL_PEPTIDE_N_REGION (PHOBIUS); CYTOPLASMIC_DOMAIN (PHOBIUS); TRANSMEMBRANE (PHOBIUS); SIGNAL_PEPTIDE_H_REGION (PHOBIUS); SIGNAL_PEPTIDE (PHOBIUS); SignalP-noTM (SIGNALP_EUK); IPR011050 (SUPERFAMILY); TMhelix (TMHMM)
Aqu2.1.07012_001	uncharacterized protein loc102800480	353	20	0	0.5965	2	F:GO:0003676; P:GO:0015074	-	G3DSA:3.30.420.10 (GENE3D); IPR001584 (PROSITE_PROFILES); IPR012337 (SUPERFAMILY)
Aqu2.1.07112_001	PREDICTED: hypothetical protein LOC100631930 [Amphimedon queenslandica]	143	4	1.94737e-42	0.795	0	-		Coil (COILS); Coil (COILS); Coil (COILS); G3DSA:1.20.5.990 (GENE3D)
Aqu2.1.07251_001	probable g-protein coupled receptor 125-like	760	20	6.87845e-116	0.481	3	P:GO:0007166; C:GO:0016020; F:GO:0004930	-	IPR001879 (SMART); IPR001879 (PFAM); IPR001879 (PROSITE_PROFILES); IPR001879 (PROSITE_PROFILES); SSF111418 (SUPERFAMILY); SSF111418 (SUPERFAMILY)
Aqu2.1.07433_001	gamma-aminobutyric acid type b receptor subunit 2-like	538	20	7.55221e-14	0.447	3	P:GO:0007186; F:GO:0004930; C:GO:0016021		IPR001828 (PFAM); G3DSA:1.10.3720.10 (GENE3D); IPR017978 (PFAM); G3DSA:3.40.50.2300 (GENE3D); PTHR10519 (PANTHER); TRANSMEMBRANE (PHOBIUS); CYTOPLASMIC_DOMAIN (PHOBIUS); NON_CYTOPLASMIC_DOMAIN (PHOBIUS); CYTOPLASMIC_DOMAIN (PHOBIUS); NON_CYTOPLASMIC_DOMAIN (PHOBIUS); CYTOPLASMIC_DOMAIN (PHOBIUS); TRANSMEMBRANE (PHOBIUS); TRANSMEMBRANE (PHOBIUS); NON_CYTOPLASMIC_DOMAIN (PHOBIUS); TRANSMEMBRANE (PH…
Aqu2.1.07466_001	b chain crystal structure of mad mh2 domain	45	20	2.81788e-12	0.8085	40	F:GO:0003700; P:GO:0007179; F:GO:0000979; P:GO:0006954; P:GO:0071407; F:GO:0070411; P:GO:0043049; P:GO:0045669; P:GO:0030901; P:GO:0060038; F:GO:0046872; P:GO:0042592; P:GO:0009880; P:GO:0071773; P:GO:0001947; P:GO:2000223; P:GO:0061036; P:GO:0036342; P:GO:0060348; P:GO:0002051; C:GO:0005737; P:GO:1901522; F:GO:0042802; P:GO:0007276; C:GO:0005667; P:GO:0060030; P:GO:0001710; P:GO:0001657; P:GO:00…	-	IPR001132 (PFAM); IPR017855 (G3DSA:2.60.200.GENE3D); PTHR13703:SF21 (PANTHER); IPR013790 (PANTHER); IPR001132 (PROSITE_PROFILES); IPR008984 (SUPERFAMILY)
Aqu2.1.07551_001	zinc finger bed domain-containing protein 1-like	268	20	4.65881e-26	0.477	1	F:GO:0003677		IPR015880 (SMART); IPR003656 (PFAM); PTHR23272 (PANTHER); PTHR23272:SF0 (PANTHER); IPR012337 (SUPERFAMILY); SSF140996 (SUPERFAMILY)
Aqu2.1.07559_001	fibrinogen c domain-containing protein 1-like	275	20	0	0.676	2	F:GO:0016491; F:GO:0005488	-	IPR002181 (SMART); IPR002181 (PFAM); IPR014715 (G3DSA:4.10.530.GENE3D); IPR014716 (G3DSA:3.90.215.GENE3D); PTHR19143 (PANTHER); SIGNAL_PEPTIDE_N_REGION (PHOBIUS); SIGNAL_PEPTIDE (PHOBIUS); SIGNAL_PEPTIDE_C_REGION (PHOBIUS); NON_CYTOPLASMIC_DOMAIN (PHOBIUS); SIGNAL_PEPTIDE_H_REGION (PHOBIUS); IPR002181 (PROSITE_PROFILES); SignalP-noTM (SIGNALP_EUK); SignalP-noTM (SIGNALP_GRAM_NEGATIVE); IPR002181 …
Aqu2.1.08041_001	ankyrin repeat protein	479	20	0	0.4755	1	F:GO:0005515		IPR002110 (SMART); IPR020683 (G3DSA:1.25.40.GENE3D); IPR020683 (PFAM); IPR020683 (G3DSA:1.25.40.GENE3D); PTHR24123 (PANTHER); PTHR24123:SF2 (PANTHER); IPR002110 (PROSITE_PROFILES); IPR020683 (PROSITE_PROFILES); IPR002110 (PROSITE_PROFILES); IPR002110 (PROSITE_PROFILES); IPR002110 (PROSITE_PROFILES); IPR020683 (SUPERFAMILY); IPR020683 (SUPERFAMILY)
Aqu2.1.08166_001	---NA---	453	0			0	-		Coil (COILS)
Aqu2.1.08249_001	serine threonine-protein kinase 12- partial	872	20	6.23161e-52	0.4635	6	F:GO:0003676; P:GO:0044238; P:GO:0043170; F:GO:0003824; P:GO:0007165; F:GO:0005515	-	Coil (COILS); IPR011029 (G3DSA:1.10.533.GENE3D); G3DSA:3.40.50.300 (GENE3D); IPR020683 (PFAM); IPR000488 (PFAM); IPR020683 (G3DSA:1.25.40.GENE3D); IPR002110 (PROSITE_PROFILES); IPR000488 (PROSITE_PROFILES); IPR020683 (PROSITE_PROFILES); IPR011029 (SUPERFAMILY); IPR020683 (SUPERFAMILY)
Aqu2.1.08257_001	jerky protein homolog-like	871	20	0	0.6865	1	F:GO:0003677	-	Coil (COILS); IPR006600 (PFAM); IPR007889 (PFAM); IPR004875 (PFAM); PTHR19303 (PANTHER); PTHR19303:SF64 (PANTHER); IPR006600 (PROSITE_PROFILES); IPR009057 (SUPERFAMILY)
Aqu2.1.08434_001	dehydrodolichyl diphosphate synthase isoform x1	120	20	6.218e-38	0.6335	1	F:GO:0016765	EC:2.5.1.0	IPR001441 (G3DSA:3.40.1180.GENE3D); IPR001441 (PFAM); IPR001441 (PANTHER); SIGNAL_PEPTIDE_H_REGION (PHOBIUS); SIGNAL_PEPTIDE (PHOBIUS); SIGNAL_PEPTIDE_C_REGION (PHOBIUS); SIGNAL_PEPTIDE_N_REGION (PHOBIUS); NON_CYTOPLASMIC_DOMAIN (PHOBIUS); IPR001441 (SUPERFAMILY)
Aqu2.1.08555_001	---NA---	101	0			0	-		Coil (COILS)
Aqu2.1.08736_001	---NA---	38	0			0	-		CYTOPLASMIC_DOMAIN (PHOBIUS); TRANSMEMBRANE (PHOBIUS); NON_CYTOPLASMIC_DOMAIN (PHOBIUS)
Aqu2.1.08879_001	fibrinogen c domain-containing protein 1-like	311	20	0	0.759	0	-		IPR002181 (SMART); IPR014716 (G3DSA:3.90.215.GENE3D); IPR014715 (G3DSA:4.10.530.GENE3D); IPR002181 (PFAM); PTHR19143 (PANTHER); IPR020837 (PROSITE_PATTERNS); SIGNAL_PEPTIDE_H_REGION (PHOBIUS); SIGNAL_PEPTIDE_C_REGION (PHOBIUS); SIGNAL_PEPTIDE (PHOBIUS); SIGNAL_PEPTIDE_N_REGION (PHOBIUS); NON_CYTOPLASMIC_DOMAIN (PHOBIUS); IPR002181 (PROSITE_PROFILES); SignalP-noTM (SIGNALP_EUK); IPR002181 (SUPERFA…
Aqu2.1.08932_001	wd repeat-containing protein 63- partial	149	8	8.66605e-58	0.67125	3	P:GO:0042981; P:GO:0007165; C:GO:0005622		IPR011029 (G3DSA:1.10.533.GENE3D)
Aqu2.1.08968_001	---NA---	81	0			0	-		TRANSMEMBRANE (PHOBIUS); CYTOPLASMIC_DOMAIN (PHOBIUS); NON_CYTOPLASMIC_DOMAIN (PHOBIUS); TMhelix (TMHMM)
Aqu2.1.09043_001	---NA---	61	0			0	-		no IPS match
Aqu2.1.09087_001	wd repeat-containing protein 63- partial	854	20	1.68859e-106	0.5895	2	P:GO:0007165; F:GO:0005524		Coil (COILS); Coil (COILS); Coil (COILS); Coil (COILS); Coil (COILS)
Aqu2.1.09130_001	---NA---	66	0			0	-		SignalP-TM (SIGNALP_GRAM_POSITIVE)
Aqu2.1.09178_001	PREDICTED: hypothetical protein LOC100639045, partial [Amphimedon queenslandica]	561	5	1.48981e-83	0.614	1	F:GO:0005515		IPR003961 (SMART); IPR013783 (G3DSA:2.60.40.GENE3D); IPR013783 (G3DSA:2.60.40.GENE3D); NON_CYTOPLASMIC_DOMAIN (PHOBIUS); TRANSMEMBRANE (PHOBIUS); CYTOPLASMIC_DOMAIN (PHOBIUS); SIGNAL_PEPTIDE_C_REGION (PHOBIUS); SIGNAL_PEPTIDE_H_REGION (PHOBIUS); SIGNAL_PEPTIDE_N_REGION (PHOBIUS); SIGNAL_PEPTIDE (PHOBIUS); IPR003961 (PROSITE_PROFILES); IPR003961 (PROSITE_PROFILES); SignalP-noTM (SIGNALP_EUK); IPR0…
Aqu2.1.09199_001	uncharacterized protein loc102803889	470	16	7.38359e-32	0.493125	2	F:GO:0046872; F:GO:0008270		no IPS match
Aqu2.1.09201_001	tnf receptor-associated factor 3-like	65	20	1.21284e-12	0.5885	4	F:GO:0008270; P:GO:0016567; F:GO:0004842; F:GO:0005515		IPR013323 (G3DSA:3.90.890.GENE3D); PF02176 (PFAM); IPR001293 (PROSITE_PROFILES); IPR008974 (SUPERFAMILY)
Aqu2.1.09413_001	receptor-type tyrosine-protein phosphatase kappa-like	940	20	1.60807e-117	0.667	1	F:GO:0005515		IPR003961 (SMART); IPR013783 (G3DSA:2.60.40.GENE3D); IPR013783 (G3DSA:2.60.40.GENE3D); IPR003961 (PFAM); IPR013783 (G3DSA:2.60.40.GENE3D); IPR013783 (G3DSA:2.60.40.GENE3D); IPR013783 (G3DSA:2.60.40.GENE3D); PTHR10489 (PANTHER); CYTOPLASMIC_DOMAIN (PHOBIUS); SIGNAL_PEPTIDE (PHOBIUS); SIGNAL_PEPTIDE_H_REGION (PHOBIUS); NON_CYTOPLASMIC_DOMAIN (PHOBIUS); TRANSMEMBRANE (PHOBIUS); SIGNAL_PEPTIDE_C_REGI…
Aqu2.1.09430_001	neuroendocrine convertase 2	204	20	4.93014e-123	0.688	2	F:GO:0004252; P:GO:0006508	EC:3.4.21.0	IPR015500 (PRINTS); IPR000209 (G3DSA:3.40.50.GENE3D); IPR000209 (PFAM); IPR015500 (PANTHER); IPR022398 (PROSITE_PATTERNS); IPR023827 (PROSITE_PATTERNS); IPR000209 (SUPERFAMILY)
Aqu2.1.09725_001	---NA---	85	0			0	-		CYTOPLASMIC_DOMAIN (PHOBIUS); NON_CYTOPLASMIC_DOMAIN (PHOBIUS); TRANSMEMBRANE (PHOBIUS); TMhelix (TMHMM)
Aqu2.1.09754_001	udp-glucose:glycoprotein glucosyltransferase 1-like	109	20	1.0265e-71	0.8615	6	P:GO:0097359; F:GO:0003980; C:GO:0005793; C:GO:0005788; P:GO:0006486; F:GO:0051082	-	IPR009448 (PANTHER); SSF53448 (SUPERFAMILY)
Aqu2.1.09777_001	---NA---	185	0			0	-		no IPS match
Aqu2.1.09825_001	uncharacterized protein loc101240687	353	20	2.03794e-81	0.526	1	F:GO:0046872		no IPS match
Aqu2.1.09854_001	cytochrome p450 liketbp	164	4	2.29233e-07	0.6275	0	-		TMhelix (TMHMM)
Aqu2.1.09862_001	PREDICTED: hypothetical protein LOC100633393 [Amphimedon queenslandica]	672	1	1.88178e-55	0.63	1	P:GO:0007165		CYTOPLASMIC_DOMAIN (PHOBIUS); NON_CYTOPLASMIC_DOMAIN (PHOBIUS); TRANSMEMBRANE (PHOBIUS); TMhelix (TMHMM)
Aqu2.1.09891_001	tetratricopeptide repeat protein 7b-like	375	17	8.7159e-48	0.527647	2	F:GO:0016787; P:GO:0009117	-	SIGNAL_PEPTIDE_H_REGION (PHOBIUS); SIGNAL_PEPTIDE_N_REGION (PHOBIUS); SIGNAL_PEPTIDE (PHOBIUS); SIGNAL_PEPTIDE_C_REGION (PHOBIUS); NON_CYTOPLASMIC_DOMAIN (PHOBIUS); SignalP-TM (SIGNALP_EUK); TMhelix (TMHMM)
Aqu2.1.09919_001	sacsin- partial	393	5	8.4555e-70	0.558	2	F:GO:0016787; C:GO:0044424	-	no IPS match
Aqu2.1.10135_001	---NA---	47	0			0	-		no IPS match
Aqu2.1.10150_001	---NA---	140	0			0	-		SignalP-TM (SIGNALP_GRAM_POSITIVE)
Aqu2.1.10229_001	PREDICTED: hypothetical protein LOC100633900 [Amphimedon queenslandica]	81	1	6.4318e-08	0.62	0	-		no IPS match
Aqu2.1.10280_001	von willebrand factor c and egf domain-containing protein	590	20	1.42045e-59	0.5165	2	F:GO:0005515; F:GO:0005509		IPR000742 (SMART); IPR001881 (SMART); IPR013032 (PFAM); G3DSA:2.10.25.10 (GENE3D); IPR001881 (PFAM); G3DSA:2.10.25.10 (GENE3D); G3DSA:2.10.25.10 (GENE3D); PTHR24838 (PANTHER); IPR013032 (PROSITE_PATTERNS); IPR013032 (PROSITE_PATTERNS); IPR013032 (PROSITE_PATTERNS); IPR013032 (PROSITE_PATTERNS); IPR013032 (PROSITE_PATTERNS); IPR018097 (PROSITE_PATTERNS); IPR000152 (PROSITE_PATTERNS); IPR000152 (PR…
Aqu2.1.10628_001	deleted in malignant brain tumors 1 partial	188	20	1.03866e-132	0.7285	3	F:GO:0005044; C:GO:0016020; P:GO:0007165	-	IPR001190 (PRINTS); IPR017448 (SMART); G3DSA:3.10.250.10 (GENE3D); IPR001190 (PFAM); PTHR19331 (PANTHER); IPR001190 (PROSITE_PATTERNS); SIGNAL_PEPTIDE_N_REGION (PHOBIUS); SIGNAL_PEPTIDE_C_REGION (PHOBIUS); SIGNAL_PEPTIDE (PHOBIUS); NON_CYTOPLASMIC_DOMAIN (PHOBIUS); SIGNAL_PEPTIDE_H_REGION (PHOBIUS); IPR001190 (PROSITE_PROFILES); SignalP-noTM (SIGNALP_EUK); SignalP-TM (SIGNALP_GRAM_POSITIVE); IPR0…
Aqu2.1.10696_001	denn domain-containing protein 3-like	215	2	1.04581e-05	0.48	0	-		IPR005113 (PROSITE_PROFILES)
Aqu2.1.10904_001	seryl-trna mitochondrial-like	245	1	3.27402e-22	0.68	4	C:GO:0005737; F:GO:0005524; P:GO:0006434; F:GO:0004828		Coil (COILS); IPR015866 (G3DSA:1.10.287.GENE3D); TRANSMEMBRANE (PHOBIUS); NON_CYTOPLASMIC_DOMAIN (PHOBIUS); CYTOPLASMIC_DOMAIN (PHOBIUS); IPR010978 (SUPERFAMILY)
Aqu2.1.11002_001	cytidine and deoxycytidylate deaminase zinc-binding region	325	20	0	0.624	3	F:GO:0016787; F:GO:0008270; P:GO:0008152	-	Coil (COILS); IPR002125 (PFAM); G3DSA:3.40.140.10 (GENE3D); G3DSA:3.40.140.10 (GENE3D); IPR015517 (PANTHER); PTHR11086:SF4 (PANTHER); IPR016193 (SUPERFAMILY); IPR016193 (SUPERFAMILY)
Aqu2.1.11126_001	lyzozyme m1 ( -beta-n-acetylmuramidase)	1269	19	1.77034e-107	0.575263	1	F:GO:0005515		IPR003961 (SMART); IPR013783 (G3DSA:2.60.40.GENE3D); IPR003961 (PFAM); IPR013783 (G3DSA:2.60.40.GENE3D); SIGNAL_PEPTIDE_H_REGION (PHOBIUS); SIGNAL_PEPTIDE_N_REGION (PHOBIUS); NON_CYTOPLASMIC_DOMAIN (PHOBIUS); SIGNAL_PEPTIDE (PHOBIUS); SIGNAL_PEPTIDE_C_REGION (PHOBIUS); IPR003961 (PROSITE_PROFILES); IPR003961 (PROSITE_PROFILES); IPR003961 (PROSITE_PROFILES); SignalP-noTM (SIGNALP_EUK); IPR003961 (…
Aqu2.1.11209_001	deoxynucleoside triphosphate triphosphohydrolase samhd1-like	536	20	0	0.5725	2	F:GO:0046872; F:GO:0008081	EC:3.1.4.0	Coil (COILS); IPR006674 (PFAM); IPR006674 (G3DSA:1.10.3210.GENE3D); PTHR11373 (PANTHER); PTHR11373:SF11 (PANTHER); SSF109604 (SUPERFAMILY)
Aqu2.1.11273_001	---NA---	353	0			0	-		Coil (COILS); Coil (COILS)
Aqu2.1.11354_001	cytosolic carboxypeptidase 6-like	90	20	5.27855e-43	0.5835	3	P:GO:0019538; F:GO:0005488; F:GO:0004180	-	PTHR12756 (PANTHER)
Aqu2.1.11415_001	sacsin- partial	131	2	2.53908e-17	0.685	2	F:GO:0008233; C:GO:0044424	-	no IPS match
Aqu2.1.11421_001	u-box domain-containing protein 33-like	1150	20	0	0.6425	6	F:GO:0004672; P:GO:0006468; F:GO:0005524; C:GO:0005622; F:GO:0008270; F:GO:0005515	-	Coil (COILS); Coil (COILS); IPR002999 (SMART); IPR000315 (SMART); IPR015915 (G3DSA:2.120.10.GENE3D); PF13415 (PFAM); IPR002999 (PFAM); G3DSA:2.30.30.140 (GENE3D); IPR001245 (PFAM); G3DSA:1.10.510.10 (GENE3D); G3DSA:3.30.200.20 (GENE3D); IPR000315 (PFAM); PTHR23257 (PANTHER); IPR017441 (PROSITE_PATTERNS); IPR002999 (PROSITE_PROFILES); IPR000719 (PROSITE_PROFILES); IPR000315 (PROSITE_PROFILES); IPR…
Aqu2.1.11424_001	ankyrin repeat domain-containing protein 50- partial	162	20	1.8535e-30	0.6205	1	F:GO:0005515		IPR002110 (PRINTS); IPR002110 (SMART); IPR020683 (PFAM); IPR020683 (G3DSA:1.25.40.GENE3D); IPR020683 (G3DSA:1.25.40.GENE3D); PTHR24188 (PANTHER); IPR002110 (PROSITE_PROFILES); IPR020683 (PROSITE_PROFILES); IPR002110 (PROSITE_PROFILES); IPR002110 (PROSITE_PROFILES); IPR002110 (PROSITE_PROFILES); IPR020683 (SUPERFAMILY)
Aqu2.1.11443_001	fibrillin-1- partial	784	20	0	0.6535	2	F:GO:0005515; F:GO:0005509		IPR000742 (SMART); IPR001881 (SMART); G3DSA:2.10.25.10 (GENE3D); PF14670 (PFAM); G3DSA:2.10.25.10 (GENE3D); G3DSA:2.10.25.10 (GENE3D); G3DSA:2.10.25.10 (GENE3D); IPR001881 (PFAM); IPR026823 (PFAM); G3DSA:2.10.25.10 (GENE3D); G3DSA:2.10.25.10 (GENE3D); G3DSA:2.10.25.10 (GENE3D); PTHR24034 (PANTHER); IPR013032 (PROSITE_PATTERNS); IPR013032 (PROSITE_PATTERNS); IPR013032 (PROSITE_PATTERNS); IPR013032…
Aqu2.1.11531_001	major vault	330	20	2.87474e-130	0.739	2	C:GO:0005634; C:GO:0005737	-	Coil (COILS); IPR002499 (PFAM); PTHR14165:SF3 (PANTHER); PTHR14165 (PANTHER); IPR002499 (PROSITE_PROFILES); IPR002499 (PROSITE_PROFILES); IPR002499 (PROSITE_PROFILES)
Aqu2.1.11610_001	zinc finger bed domain-containing protein 1-like	596	20	1.8193e-23	0.5845	3	F:GO:0003676; F:GO:0046983; F:GO:0004842	-	IPR008906 (PFAM); PTHR23272 (PANTHER); IPR000569 (PROSITE_PROFILES); IPR012337 (SUPERFAMILY); IPR000569 (SUPERFAMILY)
Aqu2.1.11754_001	structural maintenance of chromosomes protein 5 isoform x2	142	20	1.70533e-74	0.681	7	C:GO:0030915; P:GO:0010638; P:GO:0000724; P:GO:0051276; P:GO:0007088; C:GO:0005634; P:GO:0090068	-	Coil (COILS); G3DSA:3.40.50.300 (GENE3D); PTHR19306 (PANTHER); IPR027131 (PTHR19306:PANTHER); IPR027417 (SUPERFAMILY)
Aqu2.1.11835_001	uncharacterized protein loc582807	200	20	1.65722e-54	0.5935	0	-		no IPS match
Aqu2.1.11877_001	PREDICTED: hypothetical protein LOC100639283 [Amphimedon queenslandica]	1135	1	4.8048e-07	0.42	0	-		TRANSMEMBRANE (PHOBIUS); NON_CYTOPLASMIC_DOMAIN (PHOBIUS); NON_CYTOPLASMIC_DOMAIN (PHOBIUS); TRANSMEMBRANE (PHOBIUS); TRANSMEMBRANE (PHOBIUS); CYTOPLASMIC_DOMAIN (PHOBIUS); NON_CYTOPLASMIC_DOMAIN (PHOBIUS); TRANSMEMBRANE (PHOBIUS); TRANSMEMBRANE (PHOBIUS); NON_CYTOPLASMIC_DOMAIN (PHOBIUS); CYTOPLASMIC_DOMAIN (PHOBIUS); TRANSMEMBRANE (PHOBIUS); CYTOPLASMIC_DOMAIN (PHOBIUS); NON_CYTOPLASMIC_DOMAIN …
Aqu2.1.11900_001	PREDICTED: hypothetical protein LOC100638197 [Amphimedon queenslandica]	169	7	1.20164e-12	0.53	0	-		no IPS match
Aqu2.1.11925_001	---NA---	58	0			0	-		no IPS match
Aqu2.1.12223_001	PREDICTED: hypothetical protein LOC100637094 [Amphimedon queenslandica]	278	1	3.46113e-76	0.77	0	-		no IPS match
Aqu2.1.12233_001	PREDICTED: hypothetical protein LOC100638018 [Amphimedon queenslandica]	889	20	0	0.6575	1	P:GO:0007165	-	Coil (COILS); Coil (COILS); Coil (COILS); IPR011029 (G3DSA:1.10.533.GENE3D); IPR011029 (SUPERFAMILY)
Aqu2.1.12280_001	wd repeat-containing protein 63- partial	1079	20	0	0.633	5	F:GO:0016301; P:GO:0016310; F:GO:0005515; C:GO:0005622; P:GO:0042981	-	Coil (COILS); IPR015915 (G3DSA:2.120.10.GENE3D); PF13964 (PFAM); PF13854 (PFAM); PTHR23244 (PANTHER); IPR001315 (PROSITE_PROFILES); IPR011043 (SUPERFAMILY)
Aqu2.1.12299_001	ankyrin repeat protein	211	20	4.24949e-35	0.5705	1	F:GO:0005515		IPR002110 (PRINTS); IPR002110 (SMART); IPR020683 (G3DSA:1.25.40.GENE3D); IPR020683 (PFAM); IPR020683 (G3DSA:1.25.40.GENE3D); PTHR24188 (PANTHER); IPR002110 (PROSITE_PROFILES); IPR002110 (PROSITE_PROFILES); IPR002110 (PROSITE_PROFILES); IPR002110 (PROSITE_PROFILES); IPR020683 (PROSITE_PROFILES); IPR002110 (PROSITE_PROFILES); IPR002110 (PROSITE_PROFILES); IPR020683 (SUPERFAMILY)
Aqu2.1.12414_001	PREDICTED: hypothetical protein LOC100636176, partial [Amphimedon queenslandica]	132	1	2.99528e-80	1	0	-		no IPS match
Aqu2.1.12523_001	acetyltransferase family protein	188	2	9.81401e-07	0.635	0	-		CYTOPLASMIC_DOMAIN (PHOBIUS); NON_CYTOPLASMIC_DOMAIN (PHOBIUS); TRANSMEMBRANE (PHOBIUS); TMhelix (TMHMM)
Aqu2.1.12625_001	lyzozyme m1 ( -beta-n-acetylmuramidase)	543	17	1.13074e-59	0.544706	1	F:GO:0005515		IPR003961 (SMART); IPR003961 (PFAM); IPR013783 (G3DSA:2.60.40.GENE3D); IPR003961 (PROSITE_PROFILES); IPR003961 (PROSITE_PROFILES); IPR003961 (SUPERFAMILY)
Aqu2.1.12652_001	deleted in malignant brain tumors 1	484	20	0	0.5645	3	C:GO:0016020; F:GO:0005044; F:GO:0005515		IPR001190 (PRINTS); IPR017448 (SMART); IPR003961 (SMART); IPR001190 (PFAM); IPR003961 (PFAM); IPR013783 (G3DSA:2.60.40.GENE3D); G3DSA:3.10.250.10 (GENE3D); PTHR19331 (PANTHER); PTHR19331:SF16 (PANTHER); IPR001190 (PROSITE_PATTERNS); IPR001190 (PROSITE_PROFILES); IPR003961 (PROSITE_PROFILES); IPR001190 (PROSITE_PROFILES); IPR020067 (PROSITE_PROFILES); IPR003961 (SUPERFAMILY); IPR017448 (SUPERFAMIL…
Aqu2.1.12683_001	e3 ubiquitin-protein ligase rnf213 isoform x1	858	20	0	0.5605	0	-		Coil (COILS)
Aqu2.1.12763_001	cytoplasmic dynein 1 heavy chain 1	257	20	4.92874e-71	0.7165	12	C:GO:0030175; C:GO:0005858; P:GO:0003341; C:GO:0005874; C:GO:0070062; P:GO:0033962; C:GO:0005813; F:GO:0000166; P:GO:0034063; F:GO:0051959; C:GO:0005794; F:GO:0003777	-	Coil (COILS); Coil (COILS); PTHR10676:SF28 (PANTHER); IPR026983 (PANTHER)
Aqu2.1.12817_001	transposase	147	6	1.57949e-10	0.551667	1	F:GO:0003677		IPR011991 (G3DSA:1.10.10.GENE3D); PTHR23022 (PANTHER); IPR009057 (SUPERFAMILY)
Aqu2.1.12842_001	deleted in malignant brain tumors 1	522	20	0	0.6185	2	C:GO:0016020; F:GO:0005044		IPR001190 (PRINTS); IPR017448 (SMART); G3DSA:3.10.250.10 (GENE3D); IPR001190 (PFAM); PTHR19331:SF192 (PANTHER); PTHR19331 (PANTHER); IPR001190 (PROSITE_PATTERNS); IPR001190 (PROSITE_PROFILES); IPR001190 (PROSITE_PROFILES); IPR001190 (PROSITE_PROFILES); IPR001190 (PROSITE_PROFILES); IPR017448 (SUPERFAMILY); IPR017448 (SUPERFAMILY); IPR017448 (SUPERFAMILY); IPR017448 (SUPERFAMILY)
Aqu2.1.12847_001	golgi-specific brefeldin a-resistance guanine nucleotide exchange factor 1-like	59	2	2.75983e-22	0.745	5	F:GO:0005044; F:GO:0005086; P:GO:0032012; C:GO:0016020; P:GO:0043087	-	no IPS match
Aqu2.1.12864_001	angiogenic factor with g patch and fha domains 1-like	232	20	9.857e-128	0.5735	4	P:GO:0044699; P:GO:0032502; F:GO:0003676; F:GO:0005515	-	IPR000467 (SMART); IPR000253 (G3DSA:2.60.200.GENE3D); IPR000467 (PFAM); PTHR23106:SF2 (PANTHER); PTHR23106 (PANTHER); IPR000467 (PROSITE_PROFILES)
Aqu2.1.12897_001	---NA---	53	0			0	-		no IPS match
Aqu2.1.12898_001	---NA---	53	0			0	-		no IPS match
Aqu2.1.12944_001	latrophilin-2 isoform x4	798	5	0	0.644	0	-		NON_CYTOPLASMIC_DOMAIN (PHOBIUS); TRANSMEMBRANE (PHOBIUS); NON_CYTOPLASMIC_DOMAIN (PHOBIUS); TRANSMEMBRANE (PHOBIUS); CYTOPLASMIC_DOMAIN (PHOBIUS); TMhelix (TMHMM); TMhelix (TMHMM)
Aqu2.1.13068_001	wd repeat-containing protein 7	134	20	1.07754e-12	0.727	0	-		no IPS match
Aqu2.1.13100_001	nucleolar complex protein 2 homolog isoform 1	137	11	2.40155e-05	0.510909	0	-		no IPS match
Aqu2.1.13240_001	---NA---	157	0			0	-		no IPS match
Aqu2.1.13257_001	mitochondrial ribosome-associated gtpase 2	305	20	1.57292e-121	0.685	1	F:GO:0005525	-	Coil (COILS); IPR006073 (PRINTS); G3DSA:3.40.50.300 (GENE3D); IPR006169 (G3DSA:2.70.210.GENE3D); IPR006169 (PFAM); IPR006073 (PFAM); PTHR11702:SF15 (PANTHER); PTHR11702 (PANTHER); IPR006169 (SUPERFAMILY); IPR027417 (SUPERFAMILY)
Aqu2.1.13264_001	---NA---	325	0			0	-		Coil (COILS); Coil (COILS); Coil (COILS); Coil (COILS); Coil (COILS)
Aqu2.1.13289_001	polyphosphoinositide phosphatase- partial	64	12	1.04695e-20	0.738333	1	F:GO:0016772	-	no IPS match
Aqu2.1.13290_001	PREDICTED: hypothetical protein LOC100639668 [Amphimedon queenslandica]	487	3	3.24553e-06	0.443333	0	-		no IPS match
Aqu2.1.13315_001	neuroendocrine convertase 1	399	20	0	0.6325	35	P:GO:0033334; P:GO:0009749; P:GO:0032496; F:GO:0051087; C:GO:0005802; P:GO:0031016; F:GO:0004252; F:GO:0043559; P:GO:0010157; C:GO:0030141; C:GO:0043679; P:GO:0051592; P:GO:0070542; C:GO:0005615; P:GO:0021983; P:GO:0051384; P:GO:0016540; C:GO:0030425; P:GO:0043434; P:GO:0043278; P:GO:0048703; P:GO:0050714; P:GO:0048678; P:GO:0042493; P:GO:0060536; P:GO:0016486; P:GO:0006508; C:GO:0048471; P:GO:00…	EC:3.4.21.0	IPR015500 (PRINTS); IPR000209 (PFAM); G3DSA:3.30.70.850 (GENE3D); IPR000209 (G3DSA:3.40.50.GENE3D); IPR015500 (PANTHER); IPR022398 (PROSITE_PATTERNS); IPR023827 (PROSITE_PATTERNS); SIGNAL_PEPTIDE_H_REGION (PHOBIUS); NON_CYTOPLASMIC_DOMAIN (PHOBIUS); SIGNAL_PEPTIDE_N_REGION (PHOBIUS); SIGNAL_PEPTIDE (PHOBIUS); SIGNAL_PEPTIDE_C_REGION (PHOBIUS); SignalP-noTM (SIGNALP_EUK); SignalP-noTM (SIGNALP_GRA…
Aqu2.1.13325_001	thromboxane-a synthase-like	157	4	5.90075e-20	0.67	9	P:GO:0008152; F:GO:0008449; F:GO:0003824; F:GO:0008484; P:GO:0030203; C:GO:0016020; P:GO:0055085; P:GO:0030001; F:GO:0046873		CYTOPLASMIC_DOMAIN (PHOBIUS); NON_CYTOPLASMIC_DOMAIN (PHOBIUS); CYTOPLASMIC_DOMAIN (PHOBIUS); TRANSMEMBRANE (PHOBIUS); NON_CYTOPLASMIC_DOMAIN (PHOBIUS); TRANSMEMBRANE (PHOBIUS); TRANSMEMBRANE (PHOBIUS); CYTOPLASMIC_DOMAIN (PHOBIUS); TRANSMEMBRANE (PHOBIUS); NON_CYTOPLASMIC_DOMAIN (PHOBIUS); TRANSMEMBRANE (PHOBIUS); IPR016196 (SUPERFAMILY); TMhelix (TMHMM); TMhelix (TMHMM); TMhelix (TMHMM); TMheli…
Aqu2.1.13375_001	uncharacterized protein loc494361	476	20	0	0.636	1	F:GO:0008270	-	IPR018289 (PFAM); IPR007527 (PROSITE_PROFILES)
Aqu2.1.13412_001	iq domain-containing protein g	171	20	1.72847e-33	0.6045	1	F:GO:0005515		Coil (COILS); IPR000048 (PFAM); G3DSA:1.20.5.190 (GENE3D); PTHR14871:SF0 (PANTHER); PTHR14871 (PANTHER); IPR000048 (PROSITE_PROFILES)
Aqu2.1.13490_001	dual specificity protein kinase shkd-like	303	20	2.36268e-138	0.711	4	F:GO:0004672; P:GO:0006468; F:GO:0000166; F:GO:0005515	-	IPR006652 (PFAM); PF13854 (PFAM); IPR015915 (G3DSA:2.120.10.GENE3D); PTHR23244 (PANTHER); SSF117281 (SUPERFAMILY)
Aqu2.1.13577_001	zinc finger mym-type protein 1-like	118	4	1.48513e-34	0.825	7	F:GO:0003700; F:GO:0003676; C:GO:0005634; F:GO:0008270; P:GO:0006355; C:GO:0005667; P:GO:0045449	-	Coil (COILS)
Aqu2.1.13665_001	PREDICTED: hypothetical protein LOC100639045, partial [Amphimedon queenslandica]	82	3	1.12879e-30	0.666667	1	F:GO:0005515		IPR013783 (G3DSA:2.60.40.GENE3D); IPR003961 (SUPERFAMILY)
Aqu2.1.13680_001	PREDICTED: hypothetical protein LOC100633344 [Amphimedon queenslandica]	59	1	5.44202e-12	0.75	0	-		TRANSMEMBRANE (PHOBIUS); NON_CYTOPLASMIC_DOMAIN (PHOBIUS); TRANSMEMBRANE (PHOBIUS); NON_CYTOPLASMIC_DOMAIN (PHOBIUS); CYTOPLASMIC_DOMAIN (PHOBIUS); TMhelix (TMHMM); TMhelix (TMHMM)
Aqu2.1.13690_001	---NA---	50	0			0	-		NON_CYTOPLASMIC_DOMAIN (PHOBIUS); SIGNAL_PEPTIDE_N_REGION (PHOBIUS); SIGNAL_PEPTIDE (PHOBIUS); SIGNAL_PEPTIDE_C_REGION (PHOBIUS); SIGNAL_PEPTIDE_H_REGION (PHOBIUS); SignalP-noTM (SIGNALP_EUK)
Aqu2.1.13722_001	n-acetylated-alpha-linked acidic dipeptidase 2-like	495	20	0	0.628	2	F:GO:0008238; P:GO:0006508	-	G3DSA:3.40.630.10 (GENE3D); IPR003137 (PFAM); IPR007484 (PFAM); G3DSA:3.50.30.30 (GENE3D); PTHR10404 (PANTHER); PTHR10404:SF15 (PANTHER); TRANSMEMBRANE (PHOBIUS); NON_CYTOPLASMIC_DOMAIN (PHOBIUS); CYTOPLASMIC_DOMAIN (PHOBIUS); SSF53187 (SUPERFAMILY); SSF52025 (SUPERFAMILY); TMhelix (TMHMM)
Aqu2.1.13936_001	long-chain-fatty-acid-- ligase acsbg2-like	984	20	3.20022e-117	0.626	5	F:GO:0016787; P:GO:0008152; C:GO:0044424; F:GO:0005515; P:GO:0007165	-	IPR000488 (SMART); G3DSA:3.40.50.980 (GENE3D); IPR000873 (PFAM); G3DSA:3.40.50.980 (GENE3D); G3DSA:3.80.10.10 (GENE3D); IPR000488 (PFAM); IPR011029 (G3DSA:1.10.533.GENE3D); PTHR24096:SF38 (PANTHER); PTHR24096 (PANTHER); IPR020845 (PROSITE_PATTERNS); IPR000488 (PROSITE_PROFILES); SSF52047 (SUPERFAMILY); SSF56801 (SUPERFAMILY); SSF52047 (SUPERFAMILY)
Aqu2.1.14092_001	serine threonine-protein kinase 12- partial	226	2	2.97745e-19	0.645	2	F:GO:0005515; P:GO:0007165		IPR011029 (G3DSA:1.10.533.GENE3D); IPR000488 (PFAM); IPR000488 (PROSITE_PROFILES); IPR011029 (SUPERFAMILY)
Aqu2.1.14103_001	probable ubiquitin carboxyl-terminal hydrolase faf-x-like	1454	20	0	0.649	2	F:GO:0016787; P:GO:0006511	-	IPR001394 (PFAM); PTHR24006:SF292 (PANTHER); PTHR24006 (PANTHER); IPR018200 (PROSITE_PATTERNS); IPR028889 (PROSITE_PROFILES); SSF54001 (SUPERFAMILY)
Aqu2.1.14124_001	PREDICTED: hypothetical protein LOC100641481, partial [Amphimedon queenslandica]	344	16	1.81637e-87	0.603125	1	P:GO:0007165	-	Coil (COILS); Coil (COILS)
Aqu2.1.14128_001	heat shock 70 kda protein 4-like	863	20	0	0.664	1	F:GO:0005524	-	Coil (COILS); IPR013126 (PRINTS); G3DSA:2.60.34.10 (GENE3D); G3DSA:3.30.30.30 (GENE3D); G3DSA:3.30.420.40 (GENE3D); IPR013126 (PFAM); G3DSA:3.90.640.10 (GENE3D); G3DSA:1.20.1270.10 (GENE3D); G3DSA:3.30.420.40 (GENE3D); PTHR19375:SF17 (PANTHER); PTHR19375 (PANTHER); IPR018181 (PROSITE_PATTERNS); SSF100920 (SUPERFAMILY); SSF100934 (SUPERFAMILY); SSF53067 (SUPERFAMILY); SSF100934 (SUPERFAMILY); SSF5…
Aqu2.1.14129_001	arginine--trna cytoplasmic	188	20	1.40912e-125	0.815	12	P:GO:0006420; C:GO:0005829; C:GO:0017101; C:GO:0005739; C:GO:0005730; F:GO:0005524; F:GO:0034618; F:GO:0005515; F:GO:0004814; F:GO:0000049; P:GO:0006525; P:GO:0006560	EC:6.1.1.19	IPR008909 (SMART); IPR014729 (G3DSA:3.40.50.GENE3D); IPR015945 (PFAM); IPR008909 (PFAM); G3DSA:1.10.730.10 (GENE3D); IPR001278 (PANTHER); PTHR11956:SF0 (PANTHER); SignalP-noTM (SIGNALP_EUK); IPR009080 (SUPERFAMILY)
Aqu2.1.14263_001	hepatocyte growth factor receptor-like	2216	20	0	0.8555	6	F:GO:0004713; P:GO:0018108; F:GO:0005524; F:GO:0005044; C:GO:0016020; F:GO:0005515	EC:2.7.10.0	IPR001190 (PRINTS); IPR001245 (PRINTS); IPR020635 (SMART); IPR017448 (SMART); G3DSA:1.10.510.10 (GENE3D); G3DSA:1.10.510.10 (GENE3D); G3DSA:3.10.250.10 (GENE3D); G3DSA:3.30.200.20 (GENE3D); IPR001245 (PFAM); IPR001190 (PFAM); PTHR24416 (PANTHER); IPR008266 (PROSITE_PATTERNS); IPR008266 (PROSITE_PATTERNS); IPR017441 (PROSITE_PATTERNS); IPR017441 (PROSITE_PATTERNS); IPR008266 (PROSITE_PATTERNS); IP…
Aqu2.1.14321_001	protein arginine n-methyltransferase 3- partial	1096	20	4.17657e-145	0.6465	3	F:GO:1901363; F:GO:0097159; F:GO:0005515	-	Coil (COILS); Coil (COILS); Coil (COILS); Coil (COILS); IPR015915 (G3DSA:2.120.10.GENE3D); SSF117281 (SUPERFAMILY)
Aqu2.1.14322_001	receptor-type tyrosine-protein phosphatase f-like	1285	20	8.36346e-145	0.631	1	F:GO:0005515		IPR003961 (SMART); IPR013783 (G3DSA:2.60.40.GENE3D); IPR013783 (G3DSA:2.60.40.GENE3D); IPR013783 (G3DSA:2.60.40.GENE3D); IPR013783 (G3DSA:2.60.40.GENE3D); IPR013783 (G3DSA:2.60.40.GENE3D); IPR003961 (PFAM); IPR013783 (G3DSA:2.60.40.GENE3D); PTHR10489:SF336 (PANTHER); PTHR10489 (PANTHER); SIGNAL_PEPTIDE_C_REGION (PHOBIUS); SIGNAL_PEPTIDE_H_REGION (PHOBIUS); TRANSMEMBRANE (PHOBIUS); NON_CYTOPLASMIC…
Aqu2.1.14534_001	histone -like	131	20	4.54944e-90	0.666	5	C:GO:0000786; F:GO:0003677; P:GO:0006334; F:GO:0046982; C:GO:0005634	-	IPR000164 (PRINTS); IPR000164 (SMART); IPR007125 (PFAM); IPR009072 (G3DSA:1.10.20.GENE3D); IPR000164 (PANTHER); IPR009072 (SUPERFAMILY)
Aqu2.1.14546_001	ankyrin repeat and ibr domain-containing protein 1-like	380	1	3.3392e-24	0.47	2	F:GO:0046872; F:GO:0008270		NON_CYTOPLASMIC_DOMAIN (PHOBIUS); TRANSMEMBRANE (PHOBIUS); TRANSMEMBRANE (PHOBIUS); CYTOPLASMIC_DOMAIN (PHOBIUS); CYTOPLASMIC_DOMAIN (PHOBIUS); TRANSMEMBRANE (PHOBIUS); CYTOPLASMIC_DOMAIN (PHOBIUS); TRANSMEMBRANE (PHOBIUS); NON_CYTOPLASMIC_DOMAIN (PHOBIUS); TRANSMEMBRANE (PHOBIUS); NON_CYTOPLASMIC_DOMAIN (PHOBIUS); TMhelix (TMHMM); TMhelix (TMHMM); TMhelix (TMHMM); TMhelix (TMHMM); TMhelix (TMHMM)
Aqu2.1.14596_001	integrin beta-5	150	20	1.34758e-45	0.554	7	C:GO:0016021; P:GO:0007229; F:GO:0004872; F:GO:0005102; P:GO:0007155; P:GO:0007275; C:GO:0044464	-	IPR015812 (PRINTS); IPR016201 (SMART); IPR002035 (G3DSA:3.40.50.GENE3D); IPR002369 (PFAM); IPR002165 (PFAM); IPR015812 (PANTHER); PTHR10082:SF16 (PANTHER); SIGNAL_PEPTIDE_H_REGION (PHOBIUS); SIGNAL_PEPTIDE_N_REGION (PHOBIUS); SIGNAL_PEPTIDE (PHOBIUS); NON_CYTOPLASMIC_DOMAIN (PHOBIUS); SIGNAL_PEPTIDE_C_REGION (PHOBIUS); SignalP-TM (SIGNALP_GRAM_POSITIVE); SignalP-noTM (SIGNALP_EUK); SignalP-noTM (…
Aqu2.1.14696_001	protein	830	10	8.48762e-28	0.486	4	C:GO:0016021; F:GO:0005216; P:GO:0006811; P:GO:0055085	-	SIGNAL_PEPTIDE_N_REGION (PHOBIUS); TRANSMEMBRANE (PHOBIUS); TRANSMEMBRANE (PHOBIUS); CYTOPLASMIC_DOMAIN (PHOBIUS); TRANSMEMBRANE (PHOBIUS); SIGNAL_PEPTIDE_C_REGION (PHOBIUS); TRANSMEMBRANE (PHOBIUS); CYTOPLASMIC_DOMAIN (PHOBIUS); SIGNAL_PEPTIDE_H_REGION (PHOBIUS); CYTOPLASMIC_DOMAIN (PHOBIUS); TRANSMEMBRANE (PHOBIUS); SIGNAL_PEPTIDE (PHOBIUS); NON_CYTOPLASMIC_DOMAIN (PHOBIUS); NON_CYTOPLASMIC_DOM…
Aqu2.1.14741_001	receptor-type tyrosine-protein phosphatase f-like	708	20	6.05219e-105	0.535	1	F:GO:0005515		IPR003961 (SMART); IPR013783 (G3DSA:2.60.40.GENE3D); IPR003961 (PFAM); IPR013783 (G3DSA:2.60.40.GENE3D); IPR013783 (G3DSA:2.60.40.GENE3D); PTHR10489 (PANTHER); IPR003961 (PROSITE_PROFILES); IPR003961 (PROSITE_PROFILES); IPR003961 (PROSITE_PROFILES); IPR003961 (SUPERFAMILY); IPR003961 (SUPERFAMILY)
Aqu2.1.14782_001	receptor-type tyrosine-protein phosphatase f-like	987	20	3.28341e-98	0.5815	5	P:GO:0044763; P:GO:0051239; P:GO:0050877; P:GO:0050794; F:GO:0005515	-	IPR003961 (SMART); IPR013783 (G3DSA:2.60.40.GENE3D); IPR013783 (G3DSA:2.60.40.GENE3D); IPR003961 (PFAM); IPR013783 (G3DSA:2.60.40.GENE3D); PTHR10489 (PANTHER); SIGNAL_PEPTIDE_N_REGION (PHOBIUS); SIGNAL_PEPTIDE_C_REGION (PHOBIUS); NON_CYTOPLASMIC_DOMAIN (PHOBIUS); SIGNAL_PEPTIDE_H_REGION (PHOBIUS); TRANSMEMBRANE (PHOBIUS); CYTOPLASMIC_DOMAIN (PHOBIUS); SIGNAL_PEPTIDE (PHOBIUS); IPR003961 (PROSITE_…
Aqu2.1.14841_001	uncharacterized protein loc100888891	555	20	0	0.5335	2	P:GO:0009987; F:GO:0003824	-	no IPS match
Aqu2.1.14855_001	rna-editing-associated protein 1	261	4	1.66031e-08	0.43	0	-		no IPS match
Aqu2.1.14863_001	tripartite motif-containing protein 71-like	657	20	1.27653e-142	0.584	3	F:GO:0005515; F:GO:0008270; C:GO:0005622		Coil (COILS); Coil (COILS); Coil (COILS); IPR001841 (SMART); IPR000315 (G3DSA:4.10.45.GENE3D); IPR013083 (G3DSA:3.30.40.GENE3D); IPR011042 (G3DSA:2.120.10.GENE3D); IPR001258 (PFAM); IPR027370 (PFAM); IPR000315 (PFAM); PTHR24103 (PANTHER); PTHR24103:SF134 (PANTHER); IPR017907 (PROSITE_PATTERNS); IPR013017 (PROSITE_PROFILES); IPR013017 (PROSITE_PROFILES); IPR013017 (PROSITE_PROFILES); IPR001841 (PR…
Aqu2.1.14945_001	---NA---	155	0			0	-		no IPS match
Aqu2.1.15019_001	tfiia-alpha and beta-like factor isoform x1	441	20	6.76734e-28	0.5675	9	F:GO:0017025; P:GO:0006367; C:GO:0005672; F:GO:0003677; P:GO:0006368; F:GO:0046982; P:GO:0016032; F:GO:0003713; P:GO:0045941	-	IPR013028 (G3DSA:1.10.287.GENE3D); IPR004855 (PFAM); IPR009088 (G3DSA:2.30.18.GENE3D); IPR004855 (PANTHER); IPR009088 (SUPERFAMILY); IPR009083 (SUPERFAMILY)
Aqu2.1.15196_001	phosphatidylinositol phosphatase ptprq	3069	20	0	0.495	1	F:GO:0005515		IPR003598 (SMART); IPR003961 (SMART); IPR003599 (SMART); PF13927 (PFAM); IPR013783 (G3DSA:2.60.40.GENE3D); IPR013783 (G3DSA:2.60.40.GENE3D); PF13895 (PFAM); IPR013783 (G3DSA:2.60.40.GENE3D); IPR013098 (PFAM); IPR013783 (G3DSA:2.60.40.GENE3D); IPR013783 (G3DSA:2.60.40.GENE3D); IPR013783 (G3DSA:2.60.40.GENE3D); IPR013783 (G3DSA:2.60.40.GENE3D); IPR013783 (G3DSA:2.60.40.GENE3D); IPR013783 (G3DSA:2.6…
Aqu2.1.15224_001	propionyl- carboxylase beta mitochondrial-like	406	20	0	0.8515	1	F:GO:0016874	-	IPR000022 (PFAM); G3DSA:3.90.226.10 (GENE3D); PTHR22855 (PANTHER); PTHR22855:SF14 (PANTHER); IPR011763 (PROSITE_PROFILES); IPR011762 (PROSITE_PROFILES); SSF52096 (SUPERFAMILY)
Aqu2.1.15261_001	ephrin type-a receptor 5-like	107	2	3.7154e-25	0.735	4	F:GO:0005543; F:GO:0004672; P:GO:0006468; F:GO:0005524	-	IPR011993 (G3DSA:2.30.29.GENE3D); IPR001849 (PROSITE_PROFILES); SSF50729 (SUPERFAMILY)
Aqu2.1.15327_001	---NA---	98	0			0	-		Coil (COILS)
Aqu2.1.15366_001	PREDICTED: hypothetical protein LOC100635436 [Amphimedon queenslandica]	221	4	1.05447e-12	0.4925	1	F:GO:0005515		IPR003599 (SMART); IPR013783 (G3DSA:2.60.40.GENE3D); IPR013783 (G3DSA:2.60.40.GENE3D); PF13927 (PFAM); PF13895 (PFAM); IPR007110 (PROSITE_PROFILES); IPR007110 (PROSITE_PROFILES); SSF48726 (SUPERFAMILY); SSF48726 (SUPERFAMILY)
Aqu2.1.15390_001	---NA---	107	0			0	-		no IPS match
Aqu2.1.15446_001	shc-transforming protein 1 isoform x1	563	20	3.78734e-22	0.535	1	F:GO:0005515		IPR000980 (SMART); IPR000980 (G3DSA:3.30.505.GENE3D); IPR000980 (PFAM); PTHR10337 (PANTHER); PTHR10337:SF1 (PANTHER); IPR000980 (PROSITE_PROFILES); SSF55550 (SUPERFAMILY)
Aqu2.1.15465_001	serine threonine-protein phosphatase 6 regulatory ankyrin repeat subunit b-like	1868	20	0	0.5875	1	F:GO:0005515		IPR002110 (SMART); G3DSA:3.40.50.300 (GENE3D); IPR020683 (G3DSA:1.25.40.GENE3D); IPR020683 (G3DSA:1.25.40.GENE3D); IPR020683 (PFAM); G3DSA:3.40.50.300 (GENE3D); PF13637 (PFAM); IPR020683 (G3DSA:1.25.40.GENE3D); IPR020683 (G3DSA:1.25.40.GENE3D); IPR020683 (G3DSA:1.25.40.GENE3D); PTHR24182 (PANTHER); IPR020683 (PROSITE_PROFILES); IPR002110 (PROSITE_PROFILES); IPR002110 (PROSITE_PROFILES); IPR002110…
Aqu2.1.15505_001	reverse	211	16	4.74278e-64	0.513125	4	F:GO:0003723; P:GO:0006278; F:GO:0003964; P:GO:0007267		Coil (COILS)
Aqu2.1.15611_001	---NA---	123	0			0	-		no IPS match
Aqu2.1.15617_001	zinc finger mym-type protein 1-like	74	20	1.75187e-07	0.6955	1	F:GO:0046983		IPR008906 (PFAM)
Aqu2.1.15646_001	protein alan shepard- partial	464	20	0	0.5875	3	P:GO:0042332; F:GO:0003723; F:GO:0000166	-	IPR002343 (PRINTS); IPR000504 (SMART); IPR000504 (PFAM); IPR012677 (G3DSA:3.30.70.GENE3D); PTHR24011 (PANTHER); PTHR24011:SF112 (PANTHER); IPR000504 (PROSITE_PROFILES); IPR000504 (PROSITE_PROFILES); SSF54928 (SUPERFAMILY)
Aqu2.1.15647_001	polyphosphoinositide phosphatase	1050	20	0	0.7165	7	P:GO:0006468; P:GO:0044763; F:GO:0004672; P:GO:0007399; F:GO:0000166; F:GO:0042578; F:GO:0005515	-	Coil (COILS); G3DSA:1.20.5.110 (GENE3D); IPR002013 (PFAM); IPR015915 (G3DSA:2.120.10.GENE3D); PTHR11200 (PANTHER); PTHR11200:SF9 (PANTHER); IPR002013 (PROSITE_PROFILES); SSF117281 (SUPERFAMILY)
Aqu2.1.15652_001	structural maintenance of chromosomes protein 5-like	540	20	3.89571e-130	0.6285	5	C:GO:0030915; P:GO:0000724; P:GO:0006996; P:GO:0050794; P:GO:0007049	-	Coil (COILS); Coil (COILS); PTHR19306 (PANTHER); IPR027131 (PTHR19306:PANTHER)
Aqu2.1.15653_001	protein arginine n-methyltransferase 3- partial	785	20	1.17077e-156	0.5975	4	F:GO:0016740; F:GO:1901363; F:GO:0097159; F:GO:0005515	-	Coil (COILS); IPR006652 (PFAM); IPR015915 (G3DSA:2.120.10.GENE3D); PTHR23244 (PANTHER); SSF117281 (SUPERFAMILY)
Aqu2.1.15662_001	lon protease mitochondrial	339	20	3.94842e-126	0.8005	26	F:GO:0004252; F:GO:0004176; F:GO:0070361; F:GO:0070363; F:GO:0070362; P:GO:0007568; P:GO:0051131; P:GO:0010044; F:GO:0043531; P:GO:0070407; F:GO:0003697; C:GO:0042645; F:GO:0003727; P:GO:0006515; F:GO:0070364; P:GO:0001666; F:GO:0043565; F:GO:0070182; F:GO:0051880; P:GO:0090296; P:GO:0051260; P:GO:0006200; P:GO:0009725; F:GO:0005524; P:GO:0034599; P:GO:0006510	EC:3.4.21.0	IPR003111 (SMART); IPR003111 (PFAM); G3DSA:3.40.50.300 (GENE3D); IPR027065 (PANTHER); PTHR10046:SF23 (PANTHER); IPR015947 (SUPERFAMILY); IPR027417 (SUPERFAMILY)
Aqu2.1.15668_001	glutathione s-transferase	336	20	7.17392e-84	0.678	1	F:GO:0005515		IPR012336 (G3DSA:3.40.30.GENE3D); IPR004045 (PFAM); IPR016639 (PANTHER); IPR012336 (SUPERFAMILY)
Aqu2.1.15670_001	lrr and pyd domains-containing protein 3-like	1158	20	0	0.4535	2	F:GO:0016787; C:GO:0044424	-	G3DSA:3.40.50.300 (GENE3D); G3DSA:3.80.10.10 (GENE3D); PF05729 (PFAM); G3DSA:3.40.50.300 (GENE3D); PTHR24106 (PANTHER); IPR007111 (PROSITE_PROFILES); SSF52047 (SUPERFAMILY); IPR027417 (SUPERFAMILY)
Aqu2.1.15737_001	uncharacterized protein partial	663	20	2.84384e-126	0.4815	5	F:GO:0046872; F:GO:0008270; P:GO:0009058; F:GO:0003824; F:GO:0030170		no IPS match
Aqu2.1.15814_001	jerky protein homolog- partial	254	20	4.11025e-154	0.79	2	F:GO:0043167; F:GO:0003677	-	IPR007889 (PFAM); IPR006600 (PFAM); PTHR19303:SF64 (PANTHER); PTHR19303 (PANTHER); SignalP-noTM (SIGNALP_EUK); IPR009057 (SUPERFAMILY)
Aqu2.1.15827_001	---NA---	51	0			0	-		no IPS match
Aqu2.1.15828_001	---NA---	51	0			0	-		no IPS match
Aqu2.1.15829_001	---NA---	51	0			0	-		no IPS match
Aqu2.1.15830_001	---NA---	51	0			0	-		no IPS match
Aqu2.1.15847_001	protein misato homolog 1	537	20	7.06437e-88	0.489	7	C:GO:0005741; C:GO:0005739; F:GO:0003674; C:GO:0016020; P:GO:0048311; C:GO:0005737; P:GO:0007005		IPR003008 (G3DSA:3.40.50.GENE3D); IPR019605 (PFAM); PF14881 (PFAM); PTHR13391 (PANTHER); IPR003008 (SUPERFAMILY)
Aqu2.1.15859_001	deleted in malignant brain tumors 1	565	20	0	0.692	6	C:GO:0016020; F:GO:0004222; F:GO:0005044; P:GO:0006508; F:GO:0008270; P:GO:0007165	EC:3.4.24.0	IPR001190 (PRINTS); IPR001506 (PRINTS); IPR006026 (SMART); IPR017448 (SMART); IPR001190 (PFAM); IPR001506 (PFAM); G3DSA:3.10.250.10 (GENE3D); IPR024079 (G3DSA:3.40.390.GENE3D); PTHR19331 (PANTHER); IPR001190 (PROSITE_PATTERNS); SIGNAL_PEPTIDE_H_REGION (PHOBIUS); SIGNAL_PEPTIDE_C_REGION (PHOBIUS); SIGNAL_PEPTIDE (PHOBIUS); SIGNAL_PEPTIDE_N_REGION (PHOBIUS); NON_CYTOPLASMIC_DOMAIN (PHOBIUS); IPR001…
Aqu2.1.15944_001	hydrocephalus-inducing protein homolog	229	18	8.91618e-75	0.582778	4	P:GO:0009199; P:GO:0009119; F:GO:0016787; P:GO:0009259	-	no IPS match
Aqu2.1.15945_001	PREDICTED: hypothetical protein LOC100638610 [Amphimedon queenslandica]	115	1	2.8662e-30	0.69	0	-		TRANSMEMBRANE (PHOBIUS); NON_CYTOPLASMIC_DOMAIN (PHOBIUS); CYTOPLASMIC_DOMAIN (PHOBIUS); CYTOPLASMIC_DOMAIN (PHOBIUS); TRANSMEMBRANE (PHOBIUS); SignalP-TM (SIGNALP_EUK); TMhelix (TMHMM); TMhelix (TMHMM)
Aqu2.1.15949_001	leukocyte tyrosine kinase receptor-like	613	20	4.52731e-154	0.5665	1	F:GO:0016772	-	NON_CYTOPLASMIC_DOMAIN (PHOBIUS); TRANSMEMBRANE (PHOBIUS); CYTOPLASMIC_DOMAIN (PHOBIUS); TMhelix (TMHMM)
Aqu2.1.15954_001	---NA---	30	0			0	-		NON_CYTOPLASMIC_DOMAIN (PHOBIUS); SIGNAL_PEPTIDE_C_REGION (PHOBIUS); SIGNAL_PEPTIDE (PHOBIUS); SIGNAL_PEPTIDE_H_REGION (PHOBIUS); SIGNAL_PEPTIDE_N_REGION (PHOBIUS)
Aqu2.1.15963_001	lysophospholipid acyltransferase 5-like	100	20	3.80983e-10	0.5455	2	C:GO:0016021; C:GO:0016020		IPR004299 (PFAM); PTHR13906 (PANTHER); PTHR13906:SF4 (PANTHER); NON_CYTOPLASMIC_DOMAIN (PHOBIUS); TRANSMEMBRANE (PHOBIUS); CYTOPLASMIC_DOMAIN (PHOBIUS); TMhelix (TMHMM)
Aqu2.1.15996_001	dna helicase mcm9 isoform x3	172	20	1.3452e-65	0.746	7	F:GO:0017111; P:GO:0006260; P:GO:0000724; P:GO:0007292; C:GO:0097362; F:GO:0005524; F:GO:0003677	EC:3.6.1.15	IPR001208 (PRINTS); G3DSA:3.40.50.300 (GENE3D); IPR001208 (PFAM); PTHR11630:SF48 (PANTHER); PTHR11630 (PANTHER); IPR001208 (PROSITE_PROFILES); IPR027417 (SUPERFAMILY)
Aqu2.1.16016_001	u-box domain-containing protein 33-like	740	20	0	0.6455	4	F:GO:0004713; P:GO:0018108; F:GO:0005524; F:GO:0005515	EC:2.7.10.0	Coil (COILS); PF13418 (PFAM); PF13415 (PFAM); IPR015915 (G3DSA:2.120.10.GENE3D); G3DSA:1.10.510.10 (GENE3D); G3DSA:3.30.200.20 (GENE3D); IPR000719 (PFAM); PTHR23257 (PANTHER); IPR017441 (PROSITE_PATTERNS); IPR000719 (PROSITE_PROFILES); IPR011043 (SUPERFAMILY); IPR011009 (SUPERFAMILY); SSF117281 (SUPERFAMILY)
Aqu2.1.16079_001	netrin receptor dcc	3057	20	0	0.497	1	F:GO:0005515		IPR003598 (SMART); IPR003961 (SMART); IPR003599 (SMART); IPR013783 (G3DSA:2.60.40.GENE3D); IPR013783 (G3DSA:2.60.40.GENE3D); IPR013783 (G3DSA:2.60.40.GENE3D); PF13895 (PFAM); IPR013783 (G3DSA:2.60.40.GENE3D); IPR013783 (G3DSA:2.60.40.GENE3D); PF13927 (PFAM); IPR013783 (G3DSA:2.60.40.GENE3D); IPR013783 (G3DSA:2.60.40.GENE3D); IPR013783 (G3DSA:2.60.40.GENE3D); IPR003961 (PFAM); IPR013151 (PFAM); PT…
Aqu2.1.16085_001	---NA---	55	0			0	-		TRANSMEMBRANE (PHOBIUS); CYTOPLASMIC_DOMAIN (PHOBIUS); NON_CYTOPLASMIC_DOMAIN (PHOBIUS); TRANSMEMBRANE (PHOBIUS); NON_CYTOPLASMIC_DOMAIN (PHOBIUS); TMhelix (TMHMM); TMhelix (TMHMM)
Aqu2.1.16247_001	nuclear mitotic apparatus protein 1-like isoform x1	196	12	1.18307e-05	0.528333	0	-		Coil (COILS); Coil (COILS)
Aqu2.1.16443_001	cyclin-dependent kinase 11b-like isoform x2	682	20	0	0.798	4	P:GO:0044763; P:GO:0006468; F:GO:0005524; F:GO:0004674	-	IPR002290 (SMART); IPR000719 (PFAM); G3DSA:1.10.510.10 (GENE3D); G3DSA:3.30.200.20 (GENE3D); PTHR24056:SF96 (PANTHER); PTHR24056 (PANTHER); IPR008271 (PROSITE_PATTERNS); IPR000719 (PROSITE_PROFILES); IPR011009 (SUPERFAMILY)
Aqu2.1.16450_001	solute carrier family 17 member 9-like	128	20	7.03156e-15	0.6045	2	C:GO:0016021; P:GO:0055085		G3DSA:1.20.1250.20 (GENE3D); PTHR11662:SF19 (PANTHER); PTHR11662 (PANTHER); NON_CYTOPLASMIC_DOMAIN (PHOBIUS); TRANSMEMBRANE (PHOBIUS); SIGNAL_PEPTIDE_N_REGION (PHOBIUS); SIGNAL_PEPTIDE_H_REGION (PHOBIUS); SIGNAL_PEPTIDE_C_REGION (PHOBIUS); TRANSMEMBRANE (PHOBIUS); CYTOPLASMIC_DOMAIN (PHOBIUS); SIGNAL_PEPTIDE (PHOBIUS); NON_CYTOPLASMIC_DOMAIN (PHOBIUS); CYTOPLASMIC_DOMAIN (PHOBIUS); TRANSMEMBRANE …
Aqu2.1.16484_001	---NA---	55	0			0	-		no IPS match
Aqu2.1.16485_001	---NA---	55	0			0	-		no IPS match
Aqu2.1.16533_001	lrr and pyd domains-containing protein 8	319	20	1.90924e-50	0.582	1	F:GO:0005515		IPR001452 (SMART); IPR001452 (PFAM); G3DSA:3.80.10.10 (GENE3D); G3DSA:2.30.30.40 (GENE3D); PTHR24106 (PANTHER); IPR001452 (PROSITE_PROFILES); SSF52047 (SUPERFAMILY); IPR001452 (SUPERFAMILY)
Aqu2.1.16534_001	PREDICTED: hypothetical protein LOC100638018 [Amphimedon queenslandica]	889	20	1.09875e-140	0.6275	2	P:GO:0007165; F:GO:0005515	-	IPR001452 (SMART); IPR003590 (SMART); G3DSA:3.80.10.10 (GENE3D); IPR001452 (PFAM); G3DSA:2.30.30.40 (GENE3D); IPR001452 (PROSITE_PROFILES); SSF52047 (SUPERFAMILY); IPR001452 (SUPERFAMILY)
Aqu2.1.16542_001	subtilisin-like serine protease	135	15	2.52546e-21	0.517333	5	P:GO:0006508; F:GO:0004252; F:GO:0008236; F:GO:0016787; F:GO:0008233		NON_CYTOPLASMIC_DOMAIN (PHOBIUS); TRANSMEMBRANE (PHOBIUS); TRANSMEMBRANE (PHOBIUS); CYTOPLASMIC_DOMAIN (PHOBIUS); TRANSMEMBRANE (PHOBIUS); CYTOPLASMIC_DOMAIN (PHOBIUS); NON_CYTOPLASMIC_DOMAIN (PHOBIUS); SignalP-noTM (SIGNALP_EUK)
Aqu2.1.16567_001	low-mr gtp-binding protein rab31	253	20	9.21353e-166	0.7185	3	F:GO:0005525; P:GO:0007264; P:GO:0015031	-	IPR001806 (PRINTS); IPR003579 (SMART); IPR001806 (PFAM); IPR005225 (TIGRFAM); G3DSA:3.40.50.300 (GENE3D); PTHR24073 (PANTHER); PTHR24073:SF266 (PANTHER); PS51419 (PROSITE_PROFILES); IPR027417 (SUPERFAMILY)
Aqu2.1.16593_001	rna-directed dna polymerase from mobile element jockey-like	374	18	4.39766e-31	0.445	7	F:GO:0016787; P:GO:0006541; F:GO:0003824; F:GO:0008242; F:GO:0003723; P:GO:0006278; F:GO:0003964		IPR005135 (SUPERFAMILY)
Aqu2.1.16617_001	dynamin-like 120 kda mitochondrial-like	899	20	0	0.6595	8	P:GO:0070584; F:GO:0005525; P:GO:0006184; P:GO:0006915; P:GO:0009790; P:GO:0008053; F:GO:0003924; C:GO:0005739	-	Coil (COILS); Coil (COILS); Coil (COILS); IPR022812 (PRINTS); IPR001401 (SMART); G3DSA:3.40.50.300 (GENE3D); IPR001401 (PFAM); IPR027740 (PTHR11566:PANTHER); IPR022812 (PANTHER); NON_CYTOPLASMIC_DOMAIN (PHOBIUS); CYTOPLASMIC_DOMAIN (PHOBIUS); TRANSMEMBRANE (PHOBIUS); IPR027417 (SUPERFAMILY); TMhelix (TMHMM)
Aqu2.1.16618_001	dynamin-like 120 kda mitochondrial-like	756	20	7.20305e-155	0.578	9	C:GO:0016020; F:GO:0005525; P:GO:0006184; P:GO:0006915; P:GO:0008053; F:GO:0003924; C:GO:0005739; F:GO:0005319; P:GO:0006869	-	Coil (COILS); Coil (COILS); IPR001747 (SMART); IPR001747 (PFAM); IPR015816 (G3DSA:2.30.230.GENE3D); IPR011030 (G3DSA:1.25.10.GENE3D); SIGNAL_PEPTIDE_C_REGION (PHOBIUS); SIGNAL_PEPTIDE_N_REGION (PHOBIUS); NON_CYTOPLASMIC_DOMAIN (PHOBIUS); SIGNAL_PEPTIDE_H_REGION (PHOBIUS); SIGNAL_PEPTIDE (PHOBIUS); IPR001747 (PROSITE_PROFILES); SignalP-TM (SIGNALP_GRAM_POSITIVE); SignalP-noTM (SIGNALP_GRAM_NEGATIV…
Aqu2.1.16672_001	centromere protein j-like	1140	20	0	0.7685	12	C:GO:0005829; P:GO:0000086; P:GO:0046785; C:GO:0008275; P:GO:0051301; P:GO:0046599; C:GO:0005814; F:GO:0019904; F:GO:0019901; F:GO:0015631; P:GO:0007020; C:GO:0045298	-	Coil (COILS); Coil (COILS); Coil (COILS); IPR009852 (PFAM); IPR026581 (PANTHER)
Aqu2.1.16689_001	ephrin type-a receptor 7 isoform x4	512	20	0	0.4815	6	P:GO:0006468; C:GO:0016021; P:GO:0007169; F:GO:0004713; F:GO:0000166; F:GO:0005515	EC:2.7.10.0	IPR003961 (SMART); IPR013783 (G3DSA:2.60.40.GENE3D); IPR003961 (PFAM); PTHR24416:SF16 (PANTHER); PTHR24416 (PANTHER); SIGNAL_PEPTIDE_H_REGION (PHOBIUS); SIGNAL_PEPTIDE_N_REGION (PHOBIUS); NON_CYTOPLASMIC_DOMAIN (PHOBIUS); SIGNAL_PEPTIDE (PHOBIUS); SIGNAL_PEPTIDE_C_REGION (PHOBIUS); IPR003961 (PROSITE_PROFILES); SignalP-noTM (SIGNALP_GRAM_NEGATIVE); SignalP-noTM (SIGNALP_EUK); SignalP-TM (SIGNALP_…
Aqu2.1.16694_001	immunoglobulin superfamily dcc subclass member 4-like	961	20	0	0.456	2	P:GO:0044699; F:GO:0005515	-	IPR003599 (SMART); IPR003598 (SMART); IPR013783 (G3DSA:2.60.40.GENE3D); IPR013783 (G3DSA:2.60.40.GENE3D); IPR013151 (PFAM); PF13895 (PFAM); PTHR10489 (PANTHER); TRANSMEMBRANE (PHOBIUS); CYTOPLASMIC_DOMAIN (PHOBIUS); NON_CYTOPLASMIC_DOMAIN (PHOBIUS); IPR007110 (PROSITE_PROFILES); IPR007110 (PROSITE_PROFILES); SSF48726 (SUPERFAMILY); SSF48726 (SUPERFAMILY); TMhelix (TMHMM)
Aqu2.1.16734_001	---NA---	238	0			0	-		Coil (COILS)
Aqu2.1.16743_001	beta- -galactosyl-o-glycosyl-glycoprotein beta- -n-acetylglucosaminyltransferase 7	188	20	1.03955e-22	0.4815	1	F:GO:0016757	-	no IPS match
Aqu2.1.16769_001	npc2p	168	20	8.89082e-28	0.485	2	P:GO:0006869; P:GO:0006810		IPR003172 (SMART); G3DSA:2.70.220.10 (GENE3D); IPR003172 (PFAM); SIGNAL_PEPTIDE_C_REGION (PHOBIUS); SIGNAL_PEPTIDE_H_REGION (PHOBIUS); SIGNAL_PEPTIDE (PHOBIUS); SIGNAL_PEPTIDE_N_REGION (PHOBIUS); NON_CYTOPLASMIC_DOMAIN (PHOBIUS); SignalP-noTM (SIGNALP_EUK); IPR014756 (SUPERFAMILY); TMhelix (TMHMM)
Aqu2.1.16770_001	tripartite motif-containing protein 71-like	1084	20	1.12316e-165	0.6475	3	C:GO:0005622; F:GO:0008270; F:GO:0005515		Coil (COILS); IPR003172 (SMART); IPR003649 (SMART); IPR000315 (SMART); IPR001841 (SMART); IPR001258 (PFAM); IPR003172 (G3DSA:2.60.40.GENE3D); IPR011042 (G3DSA:2.120.10.GENE3D); IPR000315 (PFAM); PF15227 (PFAM); IPR003172 (PFAM); IPR013083 (G3DSA:3.30.40.GENE3D); PTHR24103:SF134 (PANTHER); PTHR24103 (PANTHER); IPR017907 (PROSITE_PATTERNS); IPR000315 (PROSITE_PROFILES); IPR001841 (PROSITE_PROFILES)…
Aqu2.1.16771_001	npc2p	156	20	3.69579e-28	0.5	7	P:GO:0006869; F:GO:0003674; C:GO:0016023; C:GO:0005737; C:GO:0031410; C:GO:0005794; P:GO:0006810		G3DSA:2.70.220.10 (GENE3D); IPR003172 (PFAM); SIGNAL_PEPTIDE_C_REGION (PHOBIUS); SIGNAL_PEPTIDE_H_REGION (PHOBIUS); NON_CYTOPLASMIC_DOMAIN (PHOBIUS); SIGNAL_PEPTIDE (PHOBIUS); SIGNAL_PEPTIDE_N_REGION (PHOBIUS); SignalP-noTM (SIGNALP_EUK); SignalP-TM (SIGNALP_GRAM_POSITIVE); IPR014756 (SUPERFAMILY); TMhelix (TMHMM)
Aqu2.1.16832_001	g2 m phase-specific e3 ubiquitin-protein ligase-like	603	20	3.73974e-28	0.4445	1	F:GO:0004842		IPR000569 (PROSITE_PROFILES); IPR000569 (SUPERFAMILY)
Aqu2.1.16833_001	uncharacterized protein loc102800480	419	20	0	0.6705	2	F:GO:0003676; P:GO:0015074	-	IPR001584 (PFAM); G3DSA:3.30.420.10 (GENE3D); IPR001584 (PROSITE_PROFILES); IPR012337 (SUPERFAMILY)
Aqu2.1.16847_001	e3 ubiquitin-protein ligase trim71-like	720	20	0	0.668	4	F:GO:0008270; P:GO:0006334; C:GO:0005634; F:GO:0005515	-	Coil (COILS); Coil (COILS); IPR001298 (SMART); IPR001841 (SMART); IPR000315 (SMART); IPR013083 (G3DSA:3.30.40.GENE3D); IPR000315 (PFAM); IPR018957 (PFAM); IPR000315 (G3DSA:4.10.45.GENE3D); IPR011042 (G3DSA:2.120.10.GENE3D); IPR001258 (PFAM); IPR013783 (G3DSA:2.60.40.GENE3D); PTHR24103:SF134 (PANTHER); PTHR24103 (PANTHER); IPR017907 (PROSITE_PATTERNS); IPR013017 (PROSITE_PROFILES); IPR001841 (PROS…
Aqu2.1.16866_001	---NA---	207	0			0	-		TRANSMEMBRANE (PHOBIUS); NON_CYTOPLASMIC_DOMAIN (PHOBIUS); CYTOPLASMIC_DOMAIN (PHOBIUS); NON_CYTOPLASMIC_DOMAIN (PHOBIUS); CYTOPLASMIC_DOMAIN (PHOBIUS); TRANSMEMBRANE (PHOBIUS); CYTOPLASMIC_DOMAIN (PHOBIUS); TRANSMEMBRANE (PHOBIUS); TRANSMEMBRANE (PHOBIUS); TMhelix (TMHMM); TMhelix (TMHMM); TMhelix (TMHMM); TMhelix (TMHMM)
Aqu2.1.16958_001	tyrosyl-dna phosphodiesterase 1	535	20	0	0.6595	3	F:GO:0008081; C:GO:0005634; P:GO:0006281	EC:3.1.4.0	G3DSA:3.30.870.10 (GENE3D); IPR019406 (PFAM); IPR010347 (PFAM); IPR027415 (G3DSA:3.30.870.GENE3D); IPR010347 (PANTHER); SSF56024 (SUPERFAMILY)
Aqu2.1.16998_001	ubiquitin carboxyl-terminal hydrolase 47-like	1044	20	0	0.5765	3	P:GO:0007165; F:GO:0003824; F:GO:0005515	-	Coil (COILS); IPR001452 (SMART); G3DSA:2.30.30.40 (GENE3D); G3DSA:3.80.10.10 (GENE3D); IPR011029 (G3DSA:1.10.533.GENE3D); IPR000488 (PFAM); IPR001452 (PFAM); IPR000488 (PROSITE_PROFILES); IPR000488 (PROSITE_PROFILES); IPR001452 (PROSITE_PROFILES); IPR011029 (SUPERFAMILY); IPR001452 (SUPERFAMILY); IPR011029 (SUPERFAMILY); SSF52047 (SUPERFAMILY)
Aqu2.1.17034_001	wd repeat-containing protein 3	513	20	0	0.614	3	C:GO:0005730; C:GO:0031965; F:GO:0005515	-	IPR020472 (PRINTS); IPR001680 (SMART); IPR015943 (G3DSA:2.130.10.GENE3D); IPR001680 (PFAM); IPR015943 (G3DSA:2.130.10.GENE3D); PTHR19853:SF0 (PANTHER); PTHR19853 (PANTHER); IPR019775 (PROSITE_PATTERNS); IPR019775 (PROSITE_PATTERNS); IPR001680 (PROSITE_PROFILES); IPR001680 (PROSITE_PROFILES); IPR017986 (PROSITE_PROFILES); IPR001680 (PROSITE_PROFILES); IPR001680 (PROSITE_PROFILES); IPR001680 (PROSI…
Aqu2.1.17045_001	---NA---	88	0			0	-		no IPS match
Aqu2.1.17050_001	---NA---	47	0			0	-		SignalP-TM (SIGNALP_GRAM_POSITIVE)
Aqu2.1.17110_001	sacsin- partial	1072	20	1.97689e-51	0.47	5	F:GO:0004175; P:GO:0044267; C:GO:0044424; F:GO:0005515; P:GO:0042981	-	Coil (COILS); G3DSA:3.80.10.10 (GENE3D); G3DSA:3.40.50.300 (GENE3D); CYTOPLASMIC_DOMAIN (PHOBIUS); NON_CYTOPLASMIC_DOMAIN (PHOBIUS); TRANSMEMBRANE (PHOBIUS); IPR001315 (PROSITE_PROFILES)
Aqu2.1.17164_001	receptor-type tyrosine-protein phosphatase alpha-like	1296	20	0	0.6785	4	F:GO:0004725; P:GO:0035335; P:GO:0006570; F:GO:0005515	EC:3.1.3.48	IPR000242 (PRINTS); IPR000242 (SMART); IPR003961 (SMART); IPR013783 (G3DSA:2.60.40.GENE3D); IPR003961 (PFAM); G3DSA:3.90.190.10 (GENE3D); IPR000242 (PFAM); PTHR19134 (PANTHER); IPR016130 (PROSITE_PATTERNS); SIGNAL_PEPTIDE_H_REGION (PHOBIUS); TRANSMEMBRANE (PHOBIUS); NON_CYTOPLASMIC_DOMAIN (PHOBIUS); SIGNAL_PEPTIDE_N_REGION (PHOBIUS); CYTOPLASMIC_DOMAIN (PHOBIUS); SIGNAL_PEPTIDE (PHOBIUS); SIGNAL_…
Aqu2.1.17231_001	protein	234	20	8.4547e-87	0.565	3	F:GO:0003964; P:GO:0006278; F:GO:0003723	EC:2.7.7.49	Coil (COILS)
Aqu2.1.17252_001	espin-like isoform x1	250	20	1.37584e-120	0.5355	2	P:GO:0044699; F:GO:0005515	-	IPR002110 (SMART); IPR020683 (G3DSA:1.25.40.GENE3D); IPR020683 (PFAM); IPR020683 (G3DSA:1.25.40.GENE3D); PTHR24198 (PANTHER); TRANSMEMBRANE (PHOBIUS); NON_CYTOPLASMIC_DOMAIN (PHOBIUS); CYTOPLASMIC_DOMAIN (PHOBIUS); IPR002110 (PROSITE_PROFILES); IPR002110 (PROSITE_PROFILES); IPR020683 (PROSITE_PROFILES); IPR002110 (PROSITE_PROFILES); IPR020683 (SUPERFAMILY); TMhelix (TMHMM)
Aqu2.1.17272_001	fibrinogen c domain-containing protein 1-a-like	86	19	1.31838e-16	0.756842	0	-		IPR014716 (G3DSA:3.90.215.GENE3D); IPR002181 (PFAM); NON_CYTOPLASMIC_DOMAIN (PHOBIUS); SIGNAL_PEPTIDE_C_REGION (PHOBIUS); SIGNAL_PEPTIDE (PHOBIUS); SIGNAL_PEPTIDE_H_REGION (PHOBIUS); SIGNAL_PEPTIDE_N_REGION (PHOBIUS); IPR002181 (PROSITE_PROFILES); IPR002181 (SUPERFAMILY); TMhelix (TMHMM)
Aqu2.1.17273_001	beta- -galactosyl-o-glycosyl-glycoprotein beta- -n-acetylglucosaminyltransferase 7	160	20	9.18034e-26	0.494	1	F:GO:0008375	-	PTHR19297:SF6 (PANTHER); PTHR19297 (PANTHER)
Aqu2.1.17276_001	uncharacterized protein loc101886873	633	20	0	0.5355	0	-		PTHR31912:SF1 (PANTHER); PTHR31912 (PANTHER); CYTOPLASMIC_DOMAIN (PHOBIUS); NON_CYTOPLASMIC_DOMAIN (PHOBIUS); TRANSMEMBRANE (PHOBIUS); TMhelix (TMHMM)
Aqu2.1.17280_001	cullin-3 isoform x1	763	20	0	0.79	25	P:GO:0000209; P:GO:0008054; F:GO:0031208; P:GO:0017145; C:GO:0043231; P:GO:0032467; P:GO:0006513; P:GO:0000902; P:GO:0035024; P:GO:0040016; P:GO:0007229; P:GO:0097193; P:GO:0007050; P:GO:0008284; F:GO:0031625; F:GO:0004842; C:GO:0005827; P:GO:0048208; P:GO:0043149; P:GO:0000082; P:GO:0000090; P:GO:0016477; P:GO:0048598; P:GO:0001701; C:GO:0031463	EC:6.3.2.19	Coil (COILS); IPR019559 (SMART); IPR016158 (SMART); G3DSA:4.10.1030.10 (GENE3D); IPR019559 (PFAM); IPR011991 (G3DSA:1.10.10.GENE3D); G3DSA:1.20.1310.10 (GENE3D); IPR001373 (PFAM); PTHR11932:SF58 (PANTHER); PTHR11932 (PANTHER); IPR016158 (PROSITE_PROFILES); IPR016159 (SUPERFAMILY); SSF46785 (SUPERFAMILY); IPR016158 (SUPERFAMILY)
Aqu2.1.17285_001	---NA---	45	0			0	-		no IPS match
Aqu2.1.17293_001	lon protease mitochondrial-like	71	14	2.68529e-24	0.674286	5	F:GO:0004252; P:GO:0030163; F:GO:0005524; F:GO:0004176; P:GO:0006510	EC:3.4.21.0	no IPS match
Aqu2.1.17318_001	sacsin- partial	105	1	2.17974e-17	0.59	1	F:GO:0005524		no IPS match
Aqu2.1.17322_001	PREDICTED: hypothetical protein LOC100640170 [Amphimedon queenslandica]	857	4	1.44704e-27	0.525	0	-		IPR006626 (SMART); IPR012334 (G3DSA:2.160.20.GENE3D); NON_CYTOPLASMIC_DOMAIN (PHOBIUS); TRANSMEMBRANE (PHOBIUS); NON_CYTOPLASMIC_DOMAIN (PHOBIUS); CYTOPLASMIC_DOMAIN (PHOBIUS); TRANSMEMBRANE (PHOBIUS); NON_CYTOPLASMIC_DOMAIN (PHOBIUS); CYTOPLASMIC_DOMAIN (PHOBIUS); TRANSMEMBRANE (PHOBIUS); TRANSMEMBRANE (PHOBIUS); IPR011050 (SUPERFAMILY); TMhelix (TMHMM); TMhelix (TMHMM); TMhelix (TMHMM); TMhelix…
Aqu2.1.17342_001	sushi domain-containing protein 2-like	1350	20	0	0.597	1	F:GO:0005515		IPR003961 (SMART); IPR003598 (SMART); IPR000742 (SMART); IPR003599 (SMART); IPR001846 (PFAM); IPR013783 (G3DSA:2.60.40.GENE3D); PF13895 (PFAM); G3DSA:2.10.25.10 (GENE3D); IPR013783 (G3DSA:2.60.40.GENE3D); IPR003961 (PFAM); IPR013783 (G3DSA:2.60.40.GENE3D); IPR013783 (G3DSA:2.60.40.GENE3D); G3DSA:2.10.25.10 (GENE3D); PTHR10489 (PANTHER); SIGNAL_PEPTIDE_N_REGION (PHOBIUS); NON_CYTOPLASMIC_DOMAIN (P…
Aqu2.1.17343_001	PREDICTED: hypothetical protein LOC100638610 [Amphimedon queenslandica]	572	5	1.84914e-114	0.494	0	-		TRANSMEMBRANE (PHOBIUS); TRANSMEMBRANE (PHOBIUS); NON_CYTOPLASMIC_DOMAIN (PHOBIUS); NON_CYTOPLASMIC_DOMAIN (PHOBIUS); TRANSMEMBRANE (PHOBIUS); CYTOPLASMIC_DOMAIN (PHOBIUS); CYTOPLASMIC_DOMAIN (PHOBIUS); TRANSMEMBRANE (PHOBIUS); TRANSMEMBRANE (PHOBIUS); TRANSMEMBRANE (PHOBIUS); TRANSMEMBRANE (PHOBIUS); CYTOPLASMIC_DOMAIN (PHOBIUS); TRANSMEMBRANE (PHOBIUS); NON_CYTOPLASMIC_DOMAIN (PHOBIUS); NON_CYT…
Aqu2.1.17345_001	cell surface glycoprotein muc18	214	12	1.13263e-99	0.5725	1	F:GO:0005515		IPR003599 (SMART); IPR013783 (G3DSA:2.60.40.GENE3D); PF13895 (PFAM); IPR007110 (PROSITE_PROFILES); SSF48726 (SUPERFAMILY)
Aqu2.1.17349_001	---NA---	34	0			0	-		NON_CYTOPLASMIC_DOMAIN (PHOBIUS); SIGNAL_PEPTIDE_N_REGION (PHOBIUS); SIGNAL_PEPTIDE_C_REGION (PHOBIUS); SIGNAL_PEPTIDE (PHOBIUS); SIGNAL_PEPTIDE_H_REGION (PHOBIUS); TMhelix (TMHMM)
Aqu2.1.17350_001	hypothetical protein LOTGIDRAFT_175573 [Lottia gigantea]	255	4	1.4244e-16	0.4675	0	-		IPR012340 (G3DSA:2.40.50.GENE3D); IPR012340 (SUPERFAMILY); IPR012340 (SUPERFAMILY)
Aqu2.1.17403_001	lrr and pyd domains-containing protein 3-like	1406	20	0	0.4695	4	F:GO:0016787; C:GO:0005622; F:GO:0005515; P:GO:0042981	-	PF05729 (PFAM); G3DSA:3.40.50.300 (GENE3D); PTHR24106 (PANTHER); PTHR24106:SF21 (PANTHER); TRANSMEMBRANE (PHOBIUS); TRANSMEMBRANE (PHOBIUS); CYTOPLASMIC_DOMAIN (PHOBIUS); TRANSMEMBRANE (PHOBIUS); NON_CYTOPLASMIC_DOMAIN (PHOBIUS); NON_CYTOPLASMIC_DOMAIN (PHOBIUS); CYTOPLASMIC_DOMAIN (PHOBIUS); IPR007111 (PROSITE_PROFILES); IPR001315 (PROSITE_PROFILES); IPR027417 (SUPERFAMILY); TMhelix (TMHMM)
Aqu2.1.17409_001	solute carrier family 15 member 4	405	20	1.7807e-58	0.4395	2	F:GO:0022857; P:GO:0044765	-	TRANSMEMBRANE (PHOBIUS); TRANSMEMBRANE (PHOBIUS); TRANSMEMBRANE (PHOBIUS); CYTOPLASMIC_DOMAIN (PHOBIUS); CYTOPLASMIC_DOMAIN (PHOBIUS); TRANSMEMBRANE (PHOBIUS); TRANSMEMBRANE (PHOBIUS); CYTOPLASMIC_DOMAIN (PHOBIUS); NON_CYTOPLASMIC_DOMAIN (PHOBIUS); CYTOPLASMIC_DOMAIN (PHOBIUS); TRANSMEMBRANE (PHOBIUS); TRANSMEMBRANE (PHOBIUS); NON_CYTOPLASMIC_DOMAIN (PHOBIUS); TRANSMEMBRANE (PHOBIUS); NON_CYTOPLA…
Aqu2.1.17420_001	g2 m phase-specific e3 ubiquitin-protein ligase	716	20	4.26693e-32	0.45	1	F:GO:0004842		IPR000569 (PFAM); IPR000569 (SUPERFAMILY)
Aqu2.1.17462_001	hemicentin-1	1451	20	0	0.4335	1	F:GO:0005515		IPR003598 (SMART); IPR000742 (SMART); IPR003599 (SMART); IPR013783 (G3DSA:2.60.40.GENE3D); IPR013783 (G3DSA:2.60.40.GENE3D); IPR013098 (PFAM); IPR013783 (G3DSA:2.60.40.GENE3D); IPR013783 (G3DSA:2.60.40.GENE3D); G3DSA:2.10.25.10 (GENE3D); G3DSA:2.10.25.10 (GENE3D); PF13895 (PFAM); PTHR10489 (PANTHER); IPR001368 (PROSITE_PATTERNS); IPR013032 (PROSITE_PATTERNS); SIGNAL_PEPTIDE_H_REGION (PHOBIUS); NO…
Aqu2.1.17463_001	PREDICTED: hypothetical protein LOC100640592, partial [Amphimedon queenslandica]	4776	20	0	0.492	5	F:GO:0005524; F:GO:0000166; F:GO:0017111; F:GO:0016887; P:GO:0006200		Coil (COILS); Coil (COILS); G3DSA:3.40.50.300 (GENE3D); PTHR22605 (PANTHER); NON_CYTOPLASMIC_DOMAIN (PHOBIUS); NON_CYTOPLASMIC_DOMAIN (PHOBIUS); CYTOPLASMIC_DOMAIN (PHOBIUS); TRANSMEMBRANE (PHOBIUS); TRANSMEMBRANE (PHOBIUS); IPR027417 (SUPERFAMILY)
Aqu2.1.17524_001	nadph oxidase 5-like	743	20	0	0.713	3	F:GO:0005509; F:GO:0016491; P:GO:0055114	-	IPR002048 (SMART); IPR011992 (PFAM); IPR011992 (G3DSA:1.10.238.GENE3D); G3DSA:2.40.30.10 (GENE3D); IPR002048 (PFAM); IPR011992 (G3DSA:1.10.238.GENE3D); IPR013112 (PFAM); IPR013130 (PFAM); PTHR11972 (PANTHER); PTHR11972:SF4 (PANTHER); IPR018247 (PROSITE_PATTERNS); IPR018247 (PROSITE_PATTERNS); IPR018247 (PROSITE_PATTERNS); TRANSMEMBRANE (PHOBIUS); NON_CYTOPLASMIC_DOMAIN (PHOBIUS); TRANSMEMBRANE (P…
Aqu2.1.17564_001	uncharacterized protein loc102364447	258	20	2.84418e-41	0.5125	2	F:GO:0046872; F:GO:0003676		PF13358 (PFAM); PTHR23022:SF20 (PANTHER); PTHR23022 (PANTHER)
Aqu2.1.17568_001	achain crystal structure of engineered northeast structural genomics consortium target	184	20	2.89005e-19	0.586	1	F:GO:0005515		IPR002110 (PRINTS); IPR002110 (SMART); IPR020683 (G3DSA:1.25.40.GENE3D); IPR020683 (PFAM); PTHR24198 (PANTHER); IPR002110 (PROSITE_PROFILES); IPR002110 (PROSITE_PROFILES); IPR020683 (PROSITE_PROFILES); IPR020683 (SUPERFAMILY)
Aqu2.1.17569_001	achain crystal structure of engineered northeast structural genomics consortium target	184	20	2.89005e-19	0.586	1	F:GO:0005515		IPR002110 (PRINTS); IPR002110 (SMART); IPR020683 (G3DSA:1.25.40.GENE3D); IPR020683 (PFAM); PTHR24198 (PANTHER); IPR002110 (PROSITE_PROFILES); IPR002110 (PROSITE_PROFILES); IPR020683 (PROSITE_PROFILES); IPR020683 (SUPERFAMILY)
Aqu2.1.17602_001	---NA---	56	0			0	-		no IPS match
Aqu2.1.17662_001	leukocyte tyrosine kinase receptor-like	1352	20	0	0.5435	1	F:GO:0016740	-	SIGNAL_PEPTIDE_H_REGION (PHOBIUS); NON_CYTOPLASMIC_DOMAIN (PHOBIUS); SIGNAL_PEPTIDE_N_REGION (PHOBIUS); TRANSMEMBRANE (PHOBIUS); SIGNAL_PEPTIDE_C_REGION (PHOBIUS); SIGNAL_PEPTIDE (PHOBIUS); CYTOPLASMIC_DOMAIN (PHOBIUS); SignalP-noTM (SIGNALP_EUK); TMhelix (TMHMM)
Aqu2.1.17684_001	protein	512	9	1.73062e-27	0.532222	4	C:GO:0016021; F:GO:0005216; P:GO:0006811; P:GO:0055085	-	CYTOPLASMIC_DOMAIN (PHOBIUS); CYTOPLASMIC_DOMAIN (PHOBIUS); NON_CYTOPLASMIC_DOMAIN (PHOBIUS); NON_CYTOPLASMIC_DOMAIN (PHOBIUS); NON_CYTOPLASMIC_DOMAIN (PHOBIUS); CYTOPLASMIC_DOMAIN (PHOBIUS); TRANSMEMBRANE (PHOBIUS); TRANSMEMBRANE (PHOBIUS); TRANSMEMBRANE (PHOBIUS); TRANSMEMBRANE (PHOBIUS); TRANSMEMBRANE (PHOBIUS); CYTOPLASMIC_DOMAIN (PHOBIUS); TRANSMEMBRANE (PHOBIUS); TMhelix (TMHMM); TMhelix (T…
Aqu2.1.17685_001	protein	1111	8	3.61012e-34	0.49375	4	C:GO:0016021; F:GO:0005216; P:GO:0006811; P:GO:0055085	-	IPR006626 (SMART); CYTOPLASMIC_DOMAIN (PHOBIUS); TRANSMEMBRANE (PHOBIUS); CYTOPLASMIC_DOMAIN (PHOBIUS); SIGNAL_PEPTIDE_H_REGION (PHOBIUS); SIGNAL_PEPTIDE_C_REGION (PHOBIUS); SIGNAL_PEPTIDE_N_REGION (PHOBIUS); CYTOPLASMIC_DOMAIN (PHOBIUS); TRANSMEMBRANE (PHOBIUS); TRANSMEMBRANE (PHOBIUS); NON_CYTOPLASMIC_DOMAIN (PHOBIUS); CYTOPLASMIC_DOMAIN (PHOBIUS); TRANSMEMBRANE (PHOBIUS); NON_CYTOPLASMIC_DOMAI…
Aqu2.1.17718_001	reticulon-3 isoform x2	321	20	2.3857e-161	0.5485	2	C:GO:0016021; C:GO:0016020		IPR003388 (PFAM); PTHR10994:SF12 (PANTHER); IPR003388 (PANTHER); CYTOPLASMIC_DOMAIN (PHOBIUS); CYTOPLASMIC_DOMAIN (PHOBIUS); TRANSMEMBRANE (PHOBIUS); TRANSMEMBRANE (PHOBIUS); NON_CYTOPLASMIC_DOMAIN (PHOBIUS); NON_CYTOPLASMIC_DOMAIN (PHOBIUS); TRANSMEMBRANE (PHOBIUS); IPR003388 (PROSITE_PROFILES); TMhelix (TMHMM); TMhelix (TMHMM); TMhelix (TMHMM)
Aqu2.1.17748_001	hypothetical protein BRAFLDRAFT_117518 [Branchiostoma floridae]	970	9	2.07364e-119	0.511111	2	F:GO:0030246; F:GO:0046983		no IPS match
Aqu2.1.17752_001	zinc finger and scan domain-containing protein 20-like	163	20	2.50398e-24	0.696	5	P:GO:0006164; F:GO:0005524; F:GO:0004639; F:GO:0034023; P:GO:0006189		PF13837 (PFAM); PTHR21654 (PANTHER)
Aqu2.1.17760_001	---NA---	87	0			0	-		no IPS match
Aqu2.1.17763_001	---NA---	68	0			0	-		SIGNAL_PEPTIDE_N_REGION (PHOBIUS); SIGNAL_PEPTIDE_H_REGION (PHOBIUS); SIGNAL_PEPTIDE_C_REGION (PHOBIUS); SIGNAL_PEPTIDE (PHOBIUS); NON_CYTOPLASMIC_DOMAIN (PHOBIUS); SignalP-noTM (SIGNALP_EUK)
Aqu2.1.17828_001	thymidylate kinase	156	20	6.08088e-11	0.677	4	C:GO:0043231; C:GO:0044444; P:GO:0006796; F:GO:0016301	-	IPR000953 (SMART); G3DSA:2.40.50.40 (GENE3D); IPR023780 (PFAM); G3DSA:3.40.50.300 (GENE3D); IPR000953 (PROSITE_PROFILES); IPR016197 (SUPERFAMILY)
Aqu2.1.17840_001	tyrosine-protein kinase fyn isoform x3	168	20	1.32414e-34	0.6165	24	P:GO:0048011; F:GO:0004713; P:GO:0007631; P:GO:0007411; P:GO:0031295; P:GO:0007243; C:GO:0005829; P:GO:0038096; P:GO:0030168; P:GO:0050690; P:GO:0048015; P:GO:0050900; P:GO:0045087; P:GO:0007612; C:GO:0005886; P:GO:0016032; P:GO:0007173; P:GO:0038095; F:GO:0001948; P:GO:0050852; P:GO:0008543; F:GO:0046875; P:GO:0006468; C:GO:0005768	EC:2.7.10.0	Coil (COILS); IPR001452 (SMART); G3DSA:2.30.30.40 (GENE3D); IPR001452 (PFAM); IPR001452 (PROSITE_PROFILES); IPR001452 (SUPERFAMILY)
Aqu2.1.17841_001	tyrosine-protein kinase fyn isoform x3	168	20	1.32414e-34	0.6165	24	P:GO:0048011; F:GO:0004713; P:GO:0007631; P:GO:0007411; P:GO:0031295; P:GO:0007243; C:GO:0005829; P:GO:0038096; P:GO:0030168; P:GO:0050690; P:GO:0048015; P:GO:0050900; P:GO:0045087; P:GO:0007612; C:GO:0005886; P:GO:0016032; P:GO:0007173; P:GO:0038095; F:GO:0001948; P:GO:0050852; P:GO:0008543; F:GO:0046875; P:GO:0006468; C:GO:0005768	EC:2.7.10.0	Coil (COILS); IPR001452 (SMART); G3DSA:2.30.30.40 (GENE3D); IPR001452 (PFAM); IPR001452 (PROSITE_PROFILES); IPR001452 (SUPERFAMILY)
Aqu2.1.17926_001	transient receptor potential cation channel subfamily a member 1 homolog	62	1	4.17532e-14	0.89	4	C:GO:0016021; F:GO:0005216; P:GO:0006811; P:GO:0055085	-	no IPS match
Aqu2.1.17929_001	serine threonine-protein phosphatase 6 regulatory ankyrin repeat subunit a- partial	1499	20	2.35812e-121	0.466	1	F:GO:0005515		IPR002110 (SMART); IPR020683 (G3DSA:1.25.40.GENE3D); IPR020683 (PFAM); PF13637 (PFAM); IPR002110 (PFAM); IPR020683 (G3DSA:1.25.40.GENE3D); IPR020683 (G3DSA:1.25.40.GENE3D); IPR020683 (G3DSA:1.25.40.GENE3D); PTHR24133:SF3 (PANTHER); PTHR24133 (PANTHER); IPR002110 (PROSITE_PROFILES); IPR020683 (PROSITE_PROFILES); IPR002110 (PROSITE_PROFILES); IPR002110 (PROSITE_PROFILES); IPR020683 (SUPERFAMILY); I…
Aqu2.1.17930_001	tnf receptor-associated factor 3-like	320	20	2.11815e-84	0.493	5	P:GO:0050789; F:GO:0005515; F:GO:0008270; F:GO:0004842; P:GO:0016567	-	Coil (COILS); IPR001841 (SMART); IPR013323 (G3DSA:3.90.890.GENE3D); IPR013083 (G3DSA:3.30.40.GENE3D); PF13923 (PFAM); PF02176 (PFAM); PTHR10131:SF52 (PANTHER); PTHR10131 (PANTHER); IPR017907 (PROSITE_PATTERNS); IPR001293 (PROSITE_PROFILES); IPR001841 (PROSITE_PROFILES); SSF57850 (SUPERFAMILY); IPR008974 (SUPERFAMILY)
Aqu2.1.17960_001	nadph oxidase 5-like	118	12	1.81171e-26	0.6225	4	F:GO:0005524; F:GO:0004672; P:GO:0006468; F:GO:0016772		no IPS match
Aqu2.1.17962_001	---NA---	111	0			0	-		no IPS match
Aqu2.1.17973_001	serine threonine-protein kinase nek8-like	933	20	0	0.6255	3	F:GO:0005524; P:GO:0006468; F:GO:0004672	-	Coil (COILS); IPR000408 (PRINTS); G3DSA:1.10.510.10 (GENE3D); IPR000408 (PFAM); IPR009091 (G3DSA:2.130.10.GENE3D); IPR000719 (PFAM); PTHR22870 (PANTHER); IPR000408 (PROSITE_PROFILES); IPR000408 (PROSITE_PROFILES); IPR000719 (PROSITE_PROFILES); IPR000408 (PROSITE_PROFILES); IPR000408 (PROSITE_PROFILES); IPR000408 (PROSITE_PROFILES); IPR011009 (SUPERFAMILY); IPR009091 (SUPERFAMILY)
Aqu2.1.17974_001	zinc metalloproteinase nas-34-like	315	20	4.46531e-25	0.5175	3	P:GO:0006508; F:GO:0004222; F:GO:0008270	-	IPR001506 (PRINTS); IPR006026 (SMART); IPR024079 (G3DSA:3.40.390.GENE3D); IPR001506 (PFAM); NON_CYTOPLASMIC_DOMAIN (PHOBIUS); SIGNAL_PEPTIDE_C_REGION (PHOBIUS); SIGNAL_PEPTIDE_N_REGION (PHOBIUS); SIGNAL_PEPTIDE_H_REGION (PHOBIUS); SIGNAL_PEPTIDE (PHOBIUS); SignalP-TM (SIGNALP_GRAM_POSITIVE); SignalP-noTM (SIGNALP_EUK); SSF55486 (SUPERFAMILY)
Aqu2.1.17978_001	deleted in malignant brain tumors 1	1235	20	0	0.7645	6	F:GO:0005044; F:GO:0004672; P:GO:0006468; F:GO:0005524; C:GO:0016021; P:GO:0007165	-	IPR001190 (PRINTS); IPR003644 (SMART); IPR017448 (SMART); IPR001190 (PFAM); G3DSA:3.10.250.10 (GENE3D); IPR003644 (PFAM); PTHR19331 (PANTHER); IPR001190 (PROSITE_PATTERNS); IPR001190 (PROSITE_PATTERNS); IPR001190 (PROSITE_PATTERNS); NON_CYTOPLASMIC_DOMAIN (PHOBIUS); TRANSMEMBRANE (PHOBIUS); CYTOPLASMIC_DOMAIN (PHOBIUS); IPR001190 (PROSITE_PROFILES); IPR001190 (PROSITE_PROFILES); IPR001190 (PROSIT…
Aqu2.1.17983_001	---NA---	155	0			0	-		no IPS match
Aqu2.1.17985_001	PREDICTED: hypothetical protein LOC100639045, partial [Amphimedon queenslandica]	517	5	2.25371e-77	0.56	1	F:GO:0005515		IPR003961 (SMART); CYTOPLASMIC_DOMAIN (PHOBIUS); NON_CYTOPLASMIC_DOMAIN (PHOBIUS); TRANSMEMBRANE (PHOBIUS); IPR003961 (PROSITE_PROFILES); IPR003961 (SUPERFAMILY); TMhelix (TMHMM)
Aqu2.1.18003_001	hypothetical protein CGI_10016347 [Crassostrea gigas]	90	20	2.52716e-10	0.5815	0	-		no IPS match
Aqu2.1.18013_001	deleted in malignant brain tumors 1	580	20	0	0.6865	9	C:GO:0030670; F:GO:0005515; P:GO:0048518; P:GO:0051707; C:GO:0005576; F:GO:0005044; P:GO:0030855; P:GO:0045087; P:GO:0007165	-	IPR001190 (PRINTS); IPR017448 (SMART); IPR001190 (PFAM); G3DSA:3.10.250.10 (GENE3D); PTHR19331 (PANTHER); PTHR19331:SF192 (PANTHER); IPR001190 (PROSITE_PATTERNS); IPR001190 (PROSITE_PATTERNS); IPR001190 (PROSITE_PATTERNS); IPR001190 (PROSITE_PATTERNS); CYTOPLASMIC_DOMAIN (PHOBIUS); TRANSMEMBRANE (PHOBIUS); NON_CYTOPLASMIC_DOMAIN (PHOBIUS); IPR001190 (PROSITE_PROFILES); IPR001190 (PROSITE_PROFILES…
Aqu2.1.18074_001	transient receptor potential cation channel subfamily a member 1 homolog	934	20	5.91603e-38	0.4935	1	F:GO:0005515		IPR002110 (PRINTS); IPR002110 (SMART); IPR020683 (PFAM); IPR020683 (G3DSA:1.25.40.GENE3D); IPR020683 (G3DSA:1.25.40.GENE3D); PTHR24198 (PANTHER); SIGNAL_PEPTIDE_C_REGION (PHOBIUS); NON_CYTOPLASMIC_DOMAIN (PHOBIUS); SIGNAL_PEPTIDE_N_REGION (PHOBIUS); SIGNAL_PEPTIDE (PHOBIUS); SIGNAL_PEPTIDE_H_REGION (PHOBIUS); IPR002110 (PROSITE_PROFILES); IPR002110 (PROSITE_PROFILES); PS51257 (PROSITE_PROFILES); …
Aqu2.1.18085_001	ARNT2	628	20	0	0.659	12	F:GO:0004871; P:GO:0006355; F:GO:0008026; C:GO:0005667; F:GO:0003677; F:GO:0005524; F:GO:0046983; F:GO:0003700; P:GO:0007165; C:GO:0005737; C:GO:0005634; P:GO:0045449	-	IPR001067 (PRINTS); IPR011598 (SMART); IPR000014 (SMART); IPR001610 (SMART); G3DSA:3.30.450.20 (GENE3D); IPR013767 (PFAM); IPR011598 (G3DSA:4.10.280.GENE3D); PF14598 (PFAM); IPR000014 (TIGRFAM); G3DSA:3.30.450.20 (GENE3D); IPR011598 (PFAM); PTHR23042 (PANTHER); IPR000014 (PROSITE_PROFILES); IPR011598 (PROSITE_PROFILES); IPR000014 (PROSITE_PROFILES); IPR000014 (SUPERFAMILY); IPR011598 (SUPERFAMILY…
Aqu2.1.18089_001	u1 small nuclear ribonucleoprotein 70 kda	387	20	0	0.8	5	P:GO:0043484; C:GO:0005681; F:GO:0003723; P:GO:0000398; F:GO:0000166	-	Coil (COILS); IPR000504 (SMART); IPR012677 (G3DSA:3.30.70.GENE3D); IPR000504 (PFAM); IPR022023 (PFAM); PTHR13952:SF3 (PANTHER); PTHR13952 (PANTHER); IPR000504 (PROSITE_PROFILES); SSF54928 (SUPERFAMILY)
Aqu2.1.18094_001	---NA---	44	0			0	-		no IPS match
Aqu2.1.18173_001	PREDICTED: hypothetical protein LOC100633190 [Amphimedon queenslandica]	311	1	0	1	0	-		no IPS match
Aqu2.1.18179_001	receptor-type tyrosine-protein phosphatase delta-like	966	20	1.98839e-77	0.5555	1	F:GO:0005515		IPR003961 (SMART); IPR003961 (PFAM); IPR013783 (G3DSA:2.60.40.GENE3D); IPR013783 (G3DSA:2.60.40.GENE3D); IPR013783 (G3DSA:2.60.40.GENE3D); IPR013783 (G3DSA:2.60.40.GENE3D); IPR013783 (G3DSA:2.60.40.GENE3D); PTHR10489 (PANTHER); NON_CYTOPLASMIC_DOMAIN (PHOBIUS); SIGNAL_PEPTIDE_N_REGION (PHOBIUS); CYTOPLASMIC_DOMAIN (PHOBIUS); SIGNAL_PEPTIDE (PHOBIUS); TRANSMEMBRANE (PHOBIUS); SIGNAL_PEPTIDE_H_REGI…
Aqu2.1.18276_001	isoform a	487	20	0	0.7745	1	F:GO:0005515		Coil (COILS); IPR000555 (SMART); G3DSA:3.40.140.10 (GENE3D); IPR000555 (PFAM); IPR015063 (PFAM); PTHR12947 (PANTHER); SSF102712 (SUPERFAMILY)
Aqu2.1.18289_001	leukocyte tyrosine kinase receptor-like	1438	20	0	0.7075	3	F:GO:0004713; P:GO:0018108; F:GO:0005524	EC:2.7.10.0	IPR001245 (PRINTS); IPR001245 (PFAM); G3DSA:3.30.200.20 (GENE3D); G3DSA:1.10.510.10 (GENE3D); PTHR24416 (PANTHER); IPR017441 (PROSITE_PATTERNS); NON_CYTOPLASMIC_DOMAIN (PHOBIUS); SIGNAL_PEPTIDE_C_REGION (PHOBIUS); NON_CYTOPLASMIC_DOMAIN (PHOBIUS); TRANSMEMBRANE (PHOBIUS); CYTOPLASMIC_DOMAIN (PHOBIUS); TRANSMEMBRANE (PHOBIUS); SIGNAL_PEPTIDE_N_REGION (PHOBIUS); SIGNAL_PEPTIDE (PHOBIUS); SIGNAL_PEP…
Aqu2.1.18292_001	---NA---	72	0			0	-		no IPS match
Aqu2.1.18302_001	egf-like domain-containing protein	1514	20	0	0.541	3	F:GO:0005515; F:GO:0005509; F:GO:0004867		Coil (COILS); PR01983 (PRINTS); IPR000742 (SMART); IPR001881 (SMART); IPR000436 (SMART); IPR002223 (SMART); IPR026823 (PFAM); G3DSA:2.10.25.10 (GENE3D); G3DSA:2.10.70.10 (GENE3D); G3DSA:2.10.25.10 (GENE3D); G3DSA:2.10.25.10 (GENE3D); G3DSA:2.10.25.10 (GENE3D); G3DSA:2.10.25.10 (GENE3D); G3DSA:2.10.70.10 (GENE3D); G3DSA:2.10.25.10 (GENE3D); PF14670 (PFAM); IPR001881 (PFAM); PTHR24048 (PANTHER); IP…
Aqu2.1.18357_001	proto-oncogene tyrosine-protein kinase receptor ret	917	20	2.58704e-112	0.626	3	P:GO:0006468; F:GO:0004713; F:GO:0005524	-	IPR001245 (PRINTS); IPR020635 (SMART); G3DSA:1.10.510.10 (GENE3D); G3DSA:3.30.200.20 (GENE3D); IPR001245 (PFAM); PTHR24416 (PANTHER); IPR008266 (PROSITE_PATTERNS); SIGNAL_PEPTIDE_N_REGION (PHOBIUS); SIGNAL_PEPTIDE_H_REGION (PHOBIUS); CYTOPLASMIC_DOMAIN (PHOBIUS); SIGNAL_PEPTIDE (PHOBIUS); SIGNAL_PEPTIDE_C_REGION (PHOBIUS); NON_CYTOPLASMIC_DOMAIN (PHOBIUS); TRANSMEMBRANE (PHOBIUS); IPR000719 (PROS…
Aqu2.1.18378_001	uncharacterized protein loc101940834 isoform x1	472	20	3.03541e-56	0.5105	0	-		PTHR31751 (PANTHER); PTHR31751:SF1 (PANTHER)
Aqu2.1.18415_001	dol-p-man:man c -pp-dol alpha- -mannosyltransferase	382	20	0	0.719	4	C:GO:0005789; F:GO:0000033; P:GO:0006486; C:GO:0000136	-	IPR007873 (PFAM); IPR007873 (PANTHER); PTHR12646:SF0 (PANTHER); CYTOPLASMIC_DOMAIN (PHOBIUS); NON_CYTOPLASMIC_DOMAIN (PHOBIUS); TRANSMEMBRANE (PHOBIUS); NON_CYTOPLASMIC_DOMAIN (PHOBIUS); NON_CYTOPLASMIC_DOMAIN (PHOBIUS); TRANSMEMBRANE (PHOBIUS); TRANSMEMBRANE (PHOBIUS); TRANSMEMBRANE (PHOBIUS); CYTOPLASMIC_DOMAIN (PHOBIUS); TRANSMEMBRANE (PHOBIUS); TRANSMEMBRANE (PHOBIUS); NON_CYTOPLASMIC_DOMAIN …
Aqu2.1.18464_001	conserved hypothetical protein [Capsaspora owczarzaki ATCC 30864]	559	20	8.92093e-126	0.47	6	P:GO:0009058; C:GO:0016021; C:GO:0016020; C:GO:0005794; F:GO:0001733; F:GO:0016757		G3DSA:3.40.50.1820 (GENE3D); TRANSMEMBRANE (PHOBIUS); CYTOPLASMIC_DOMAIN (PHOBIUS); TRANSMEMBRANE (PHOBIUS); SIGNAL_PEPTIDE_H_REGION (PHOBIUS); CYTOPLASMIC_DOMAIN (PHOBIUS); SIGNAL_PEPTIDE_C_REGION (PHOBIUS); NON_CYTOPLASMIC_DOMAIN (PHOBIUS); SIGNAL_PEPTIDE (PHOBIUS); NON_CYTOPLASMIC_DOMAIN (PHOBIUS); SIGNAL_PEPTIDE_N_REGION (PHOBIUS); TRANSMEMBRANE (PHOBIUS); SignalP-noTM (SIGNALP_EUK); SignalP-…
Aqu2.1.18465_001	1-phosphatidylinositol -bisphosphate phosphodiesterase gamma-1-like	362	20	0	0.5395	1	F:GO:0005515		IPR000980 (PRINTS); IPR000980 (SMART); IPR000980 (PFAM); IPR000980 (G3DSA:3.30.505.GENE3D); PTHR24418 (PANTHER); IPR000980 (PROSITE_PROFILES); SSF55550 (SUPERFAMILY)
Aqu2.1.18503_001	neutrophil cytosol factor 2 isoform x2	404	20	7.32817e-50	0.4715	1	F:GO:0005515		IPR019734 (SMART); IPR011990 (G3DSA:1.25.40.GENE3D); G3DSA:3.10.20.90 (GENE3D); PF13414 (PFAM); PTHR15175 (PANTHER); IPR019734 (PROSITE_PROFILES); IPR019734 (PROSITE_PROFILES); IPR013026 (PROSITE_PROFILES); SSF48452 (SUPERFAMILY); SSF54277 (SUPERFAMILY)
Aqu2.1.18504_001	serine threonine-protein phosphatase 6 regulatory ankyrin repeat subunit b- partial	697	20	7.16939e-136	0.572	2	F:GO:0005524; F:GO:0005515	-	IPR002110 (SMART); G3DSA:3.40.50.300 (GENE3D); IPR020683 (G3DSA:1.25.40.GENE3D); PF13637 (PFAM); IPR020683 (PFAM); PTHR24198 (PANTHER); IPR002110 (PROSITE_PROFILES); IPR002110 (PROSITE_PROFILES); IPR020683 (PROSITE_PROFILES); IPR020683 (SUPERFAMILY); IPR027417 (SUPERFAMILY)
Aqu2.1.18552_001	ubiquitin carboxyl-terminal hydrolase 47-like	1080	20	0	0.713	2	P:GO:0007165; F:GO:0005515		Coil (COILS); IPR011029 (G3DSA:1.10.533.GENE3D); PTHR24619 (PANTHER); PTHR24619:SF57 (PANTHER); IPR000488 (PROSITE_PROFILES); IPR011029 (SUPERFAMILY)
Aqu2.1.18556_001	transient receptor potential cation channel subfamily a member 1 homolog	322	2	5.97818e-10	0.655	4	C:GO:0016021; F:GO:0005216; P:GO:0006811; P:GO:0055085	-	CYTOPLASMIC_DOMAIN (PHOBIUS); NON_CYTOPLASMIC_DOMAIN (PHOBIUS); TRANSMEMBRANE (PHOBIUS); NON_CYTOPLASMIC_DOMAIN (PHOBIUS); CYTOPLASMIC_DOMAIN (PHOBIUS); CYTOPLASMIC_DOMAIN (PHOBIUS); TRANSMEMBRANE (PHOBIUS); TRANSMEMBRANE (PHOBIUS); TRANSMEMBRANE (PHOBIUS); TRANSMEMBRANE (PHOBIUS); TRANSMEMBRANE (PHOBIUS); NON_CYTOPLASMIC_DOMAIN (PHOBIUS); NON_CYTOPLASMIC_DOMAIN (PHOBIUS); TMhelix (TMHMM); TMheli…
Aqu2.1.18559_001	uncharacterized transposase-like protein	122	20	1.62647e-50	0.559	0	-		PTHR31524 (PANTHER)
Aqu2.1.18564_001	hypothetical protein BRAFLDRAFT_85176 [Branchiostoma floridae]	108	1	5.22631e-05	0.53	0	-		no IPS match
Aqu2.1.18576_001	PREDICTED: hypothetical protein LOC100640075, partial [Amphimedon queenslandica]	384	20	7.14234e-115	0.582	1	P:GO:0007165	-	no IPS match
Aqu2.1.18577_001	PREDICTED: hypothetical protein LOC100640075, partial [Amphimedon queenslandica]	601	20	3.81206e-180	0.505	4	P:GO:0044267; F:GO:0003824; P:GO:0007165; F:GO:0005515	-	Coil (COILS); Coil (COILS); IPR000488 (PFAM); IPR011029 (G3DSA:1.10.533.GENE3D); IPR000488 (PROSITE_PROFILES); IPR011029 (SUPERFAMILY)
Aqu2.1.18580_001	PREDICTED: hypothetical protein LOC100636184 [Amphimedon queenslandica]	108	1	1.4528e-21	0.7	2	C:GO:0005634; F:GO:0008270		Coil (COILS); IPR012934 (PFAM)
Aqu2.1.18646_001	PREDICTED: hypothetical protein LOC100640089 [Amphimedon queenslandica]	900	20	0	0.569	3	F:GO:0016740; F:GO:0005515; P:GO:0007165	-	Coil (COILS); Coil (COILS); IPR001452 (SMART); IPR003590 (SMART); G3DSA:3.80.10.10 (GENE3D); G3DSA:2.30.30.40 (GENE3D); IPR001452 (PFAM); IPR011029 (G3DSA:1.10.533.GENE3D); IPR000488 (PROSITE_PROFILES); IPR001452 (PROSITE_PROFILES); IPR011029 (SUPERFAMILY); IPR001452 (SUPERFAMILY); SSF52047 (SUPERFAMILY)
Aqu2.1.18658_001	thromboxane-a synthase-like	425	20	1.3922e-97	0.5955	5	F:GO:0020037; F:GO:0016705; F:GO:0004497; F:GO:0005506; P:GO:0055114	-	IPR001128 (PRINTS); IPR002401 (PRINTS); IPR001128 (PFAM); IPR001128 (G3DSA:1.10.630.GENE3D); IPR001128 (G3DSA:1.10.630.GENE3D); PTHR24290:SF27 (PANTHER); PTHR24290 (PANTHER); IPR017972 (PROSITE_PATTERNS); IPR017972 (PROSITE_PATTERNS); IPR001128 (SUPERFAMILY); IPR001128 (SUPERFAMILY); IPR001128 (SUPERFAMILY)
Aqu2.1.18686_001	syntaxin-16 isoform x3	257	20	8.81606e-94	0.534	3	C:GO:0016020; P:GO:0016192; F:GO:0005515	-	Coil (COILS); Coil (COILS); IPR000727 (SMART); IPR000727 (PFAM); G3DSA:1.20.5.110 (GENE3D); PTHR19957 (PANTHER); CYTOPLASMIC_DOMAIN (PHOBIUS); NON_CYTOPLASMIC_DOMAIN (PHOBIUS); TRANSMEMBRANE (PHOBIUS); IPR000727 (PROSITE_PROFILES); IPR010989 (SUPERFAMILY); TMhelix (TMHMM)
Aqu2.1.18708_001	chemokine-like receptor 1	332	20	2.68673e-97	0.52	3	F:GO:0004930; P:GO:0007186; C:GO:0016021	-	IPR000276 (PRINTS); IPR000276 (PFAM); G3DSA:1.20.1070.10 (GENE3D); PTHR24249 (PANTHER); TRANSMEMBRANE (PHOBIUS); TRANSMEMBRANE (PHOBIUS); NON_CYTOPLASMIC_DOMAIN (PHOBIUS); NON_CYTOPLASMIC_DOMAIN (PHOBIUS); CYTOPLASMIC_DOMAIN (PHOBIUS); TRANSMEMBRANE (PHOBIUS); TRANSMEMBRANE (PHOBIUS); CYTOPLASMIC_DOMAIN (PHOBIUS); TRANSMEMBRANE (PHOBIUS); CYTOPLASMIC_DOMAIN (PHOBIUS); NON_CYTOPLASMIC_DOMAIN (PHOB…
Aqu2.1.18712_001	trace amine-associated receptor 1	285	12	3.19978e-76	0.498333	3	C:GO:0016021; F:GO:0004930; P:GO:0007186		IPR000276 (PRINTS); G3DSA:1.20.1070.10 (GENE3D); IPR000276 (PFAM); PTHR24249 (PANTHER); PTHR24249:SF89 (PANTHER); TRANSMEMBRANE (PHOBIUS); CYTOPLASMIC_DOMAIN (PHOBIUS); CYTOPLASMIC_DOMAIN (PHOBIUS); TRANSMEMBRANE (PHOBIUS); TRANSMEMBRANE (PHOBIUS); NON_CYTOPLASMIC_DOMAIN (PHOBIUS); TRANSMEMBRANE (PHOBIUS); CYTOPLASMIC_DOMAIN (PHOBIUS); NON_CYTOPLASMIC_DOMAIN (PHOBIUS); TRANSMEMBRANE (PHOBIUS); NO…
Aqu2.1.18718_001	ring finger protein 213-like	160	3	5.64805e-105	0.703333	0	-		no IPS match
Aqu2.1.18730_001	serine threonine protein kinase	1304	8	1.76242e-48	0.41875	8	F:GO:0016301; F:GO:0005524; F:GO:0004672; P:GO:0016310; F:GO:0000166; P:GO:0006468; F:GO:0016772; F:GO:0004674		IPR012334 (G3DSA:2.160.20.GENE3D); CYTOPLASMIC_DOMAIN (PHOBIUS); SIGNAL_PEPTIDE_H_REGION (PHOBIUS); NON_CYTOPLASMIC_DOMAIN (PHOBIUS); NON_CYTOPLASMIC_DOMAIN (PHOBIUS); CYTOPLASMIC_DOMAIN (PHOBIUS); NON_CYTOPLASMIC_DOMAIN (PHOBIUS); TRANSMEMBRANE (PHOBIUS); NON_CYTOPLASMIC_DOMAIN (PHOBIUS); TRANSMEMBRANE (PHOBIUS); TRANSMEMBRANE (PHOBIUS); NON_CYTOPLASMIC_DOMAIN (PHOBIUS); CYTOPLASMIC_DOMAIN (PHOB…
Aqu2.1.18731_001	tripartite motif-containing protein 71-like	635	20	1.44294e-48	0.531	3	F:GO:0008270; F:GO:0005515; C:GO:0005622		IPR001841 (SMART); IPR000315 (SMART); IPR013083 (G3DSA:3.30.40.GENE3D); IPR000315 (PFAM); IPR011042 (G3DSA:2.120.10.GENE3D); IPR018957 (PFAM); IPR001258 (PFAM); PTHR24103:SF134 (PANTHER); PTHR24103 (PANTHER); IPR017907 (PROSITE_PATTERNS); IPR013017 (PROSITE_PROFILES); IPR000315 (PROSITE_PROFILES); IPR013017 (PROSITE_PROFILES); IPR001841 (PROSITE_PROFILES); IPR013017 (PROSITE_PROFILES); SSF101898 …
Aqu2.1.18734_001	---NA---	109	0			0	-		no IPS match
Aqu2.1.18735_001	kinetochore-associated protein 1	1823	20	4.35452e-118	0.437	0	-		IPR019527 (PFAM); PTHR15688 (PANTHER); CYTOPLASMIC_DOMAIN (PHOBIUS); TRANSMEMBRANE (PHOBIUS); NON_CYTOPLASMIC_DOMAIN (PHOBIUS)
Aqu2.1.18748_001	deleted in malignant brain tumors 1	1704	20	0	0.443	2	C:GO:0016020; F:GO:0005044	-	IPR001190 (PRINTS); IPR017448 (SMART); G3DSA:3.10.250.10 (GENE3D); IPR001190 (PFAM); PTHR19331 (PANTHER); PTHR19331:SF192 (PANTHER); IPR001190 (PROSITE_PATTERNS); IPR001190 (PROSITE_PATTERNS); IPR001190 (PROSITE_PATTERNS); IPR001190 (PROSITE_PATTERNS); IPR001190 (PROSITE_PATTERNS); IPR001190 (PROSITE_PATTERNS); IPR001190 (PROSITE_PATTERNS); SIGNAL_PEPTIDE (PHOBIUS); NON_CYTOPLASMIC_DOMAIN (PHOBIU…
Aqu2.1.18752_001	uncharacterized protein loc101156956	481	20	0	0.629	2	F:GO:0003676; P:GO:0015074	-	Coil (COILS); G3DSA:3.30.420.10 (GENE3D); IPR001584 (PFAM); IPR001584 (PROSITE_PROFILES); IPR012337 (SUPERFAMILY)
Aqu2.1.18761_001	zinc finger mym-type protein 1-like	116	20	7.52493e-19	0.725	2	F:GO:0003676; F:GO:0046983	-	IPR008906 (PFAM); PTHR11697:SF8 (PANTHER); PTHR11697 (PANTHER)
Aqu2.1.18784_001	achain crystal structure of engineered northeast structural genomics consortium target	453	20	5.83763e-20	0.5745	2	F:GO:0005515; P:GO:0007165		Coil (COILS); IPR002110 (PRINTS); IPR002110 (SMART); IPR000488 (PFAM); IPR020683 (PFAM); IPR011029 (G3DSA:1.10.533.GENE3D); IPR020683 (G3DSA:1.25.40.GENE3D); PTHR24198 (PANTHER); IPR002110 (PROSITE_PROFILES); IPR000488 (PROSITE_PROFILES); IPR002110 (PROSITE_PROFILES); IPR020683 (PROSITE_PROFILES); IPR020683 (SUPERFAMILY); IPR011029 (SUPERFAMILY)
Aqu2.1.18791_001	structural maintenance of chromosomes protein 5-like	245	20	7.29946e-172	0.6795	7	C:GO:0030915; P:GO:0010638; P:GO:0000724; P:GO:0051276; P:GO:0007088; C:GO:0005634; P:GO:0090068	-	Coil (COILS); G3DSA:3.40.50.300 (GENE3D); PTHR19306 (PANTHER); IPR027131 (PTHR19306:PANTHER); IPR027417 (SUPERFAMILY)
Aqu2.1.18801_001	flavonoid 7-o-methyltransferase	444	20	3.58131e-95	0.5245	5	F:GO:0016772; P:GO:0071704; F:GO:0043168; P:GO:0044237; F:GO:0008171	EC:2.1.1.0	IPR001077 (PFAM); G3DSA:3.40.50.150 (GENE3D); PTHR11746:SF53 (PANTHER); PTHR11746 (PANTHER); NON_CYTOPLASMIC_DOMAIN (PHOBIUS); SIGNAL_PEPTIDE_N_REGION (PHOBIUS); SIGNAL_PEPTIDE_H_REGION (PHOBIUS); SIGNAL_PEPTIDE (PHOBIUS); SIGNAL_PEPTIDE_C_REGION (PHOBIUS); SSF53335 (SUPERFAMILY)
Aqu2.1.18802_001	syntaxin-binding protein 5-like isoform x1	57	20	3.64502e-06	0.733	2	P:GO:0016192; C:GO:0016021		no IPS match
Aqu2.1.18855_001	nadph--cytochrome p450 reductase isoform x1	99	20	8.25286e-60	0.752	21	P:GO:0010893; P:GO:1901615; F:GO:0005515; C:GO:0016020; P:GO:0042981; P:GO:0090346; P:GO:0032770; F:GO:0003958; P:GO:0061035; C:GO:0005829; P:GO:0051346; F:GO:0005506; P:GO:0048522; P:GO:0032787; P:GO:0055114; P:GO:0044270; C:GO:0005783; P:GO:0032870; F:GO:0016709; F:GO:0010181; P:GO:0006118	EC:1.6.2.4; EC:1.14.13.0	IPR001094 (PRINTS); IPR008254 (PFAM); G3DSA:3.40.50.360 (GENE3D); PTHR19384 (PANTHER); IPR008254 (PROSITE_PROFILES); SSF52218 (SUPERFAMILY)
Aqu2.1.18862_001	---NA---	208	0			1	F:GO:0005515		SIGNAL_PEPTIDE_N_REGION (PHOBIUS); SIGNAL_PEPTIDE (PHOBIUS); SIGNAL_PEPTIDE_H_REGION (PHOBIUS); SIGNAL_PEPTIDE_C_REGION (PHOBIUS); NON_CYTOPLASMIC_DOMAIN (PHOBIUS); SignalP-noTM (SIGNALP_GRAM_NEGATIVE); SignalP-noTM (SIGNALP_EUK); IPR008983 (SUPERFAMILY)
Aqu2.1.18863_001	ap-2 complex subunit mu isoform x2	409	20	0	0.7715	18	P:GO:0007411; C:GO:0030669; P:GO:0042059; F:GO:0005515; C:GO:0030131; C:GO:0030141; P:GO:0048011; C:GO:0005765; P:GO:0006886; C:GO:0005829; P:GO:0019886; P:GO:0050690; P:GO:0016192; P:GO:0007268; F:GO:0005215; P:GO:0016032; C:GO:0005886; C:GO:0005739	-	IPR001392 (PRINTS); IPR001392 (PIRSF); IPR022775 (PFAM); G3DSA:3.30.450.60 (GENE3D); IPR008968 (PFAM); G3DSA:2.60.40.1170 (GENE3D); PTHR11998 (PANTHER); IPR018240 (PROSITE_PATTERNS); IPR028565 (PROSITE_PROFILES); IPR028565 (SUPERFAMILY); IPR011012 (SUPERFAMILY)
Aqu2.1.18876_001	denn domain-containing protein 3-like	946	20	1.08398e-40	0.408	1	F:GO:0005515		Coil (COILS); IPR001194 (PFAM); IPR015943 (G3DSA:2.130.10.GENE3D); SSF63829 (SUPERFAMILY)
Aqu2.1.18877_001	transient receptor potential cation channel subfamily a member 1 homolog	1215	9	1.13269e-48	0.52	1	P:GO:0006810	-	IPR006626 (SMART); NON_CYTOPLASMIC_DOMAIN (PHOBIUS); CYTOPLASMIC_DOMAIN (PHOBIUS); TRANSMEMBRANE (PHOBIUS); TRANSMEMBRANE (PHOBIUS); TRANSMEMBRANE (PHOBIUS); TRANSMEMBRANE (PHOBIUS); TRANSMEMBRANE (PHOBIUS); NON_CYTOPLASMIC_DOMAIN (PHOBIUS); TRANSMEMBRANE (PHOBIUS); NON_CYTOPLASMIC_DOMAIN (PHOBIUS); CYTOPLASMIC_DOMAIN (PHOBIUS); TRANSMEMBRANE (PHOBIUS); CYTOPLASMIC_DOMAIN (PHOBIUS); NON_CYTOPLASM…
Aqu2.1.18916_001	receptor-type tyrosine-protein phosphatase alpha-like	1214	20	0	0.7685	4	F:GO:0004725; P:GO:0035335; P:GO:0006570; F:GO:0005515	EC:3.1.3.48	IPR000242 (PRINTS); PR00014 (PRINTS); IPR003599 (SMART); IPR003595 (SMART); IPR003961 (SMART); IPR000242 (SMART); IPR013783 (G3DSA:2.60.40.GENE3D); IPR013783 (G3DSA:2.60.40.GENE3D); IPR013098 (PFAM); IPR003961 (PFAM); IPR013783 (G3DSA:2.60.40.GENE3D); G3DSA:3.90.190.10 (GENE3D); IPR000242 (PFAM); IPR013783 (G3DSA:2.60.40.GENE3D); PTHR19134 (PANTHER); CYTOPLASMIC_DOMAIN (PHOBIUS); NON_CYTOPLASMIC_…
Aqu2.1.18918_001	receptor-type tyrosine-protein phosphatase alpha-like	192	20	1.18704e-118	0.876	3	F:GO:0004725; P:GO:0035335; P:GO:0006570	EC:3.1.3.48	IPR000242 (PRINTS); IPR003595 (SMART); G3DSA:3.90.190.10 (GENE3D); IPR000242 (PFAM); G3DSA:3.90.190.10 (GENE3D); PTHR19134 (PANTHER); IPR016130 (PROSITE_PATTERNS); IPR000387 (PROSITE_PROFILES); IPR000387 (PROSITE_PROFILES); IPR000242 (PROSITE_PROFILES); SSF52799 (SUPERFAMILY); SSF52799 (SUPERFAMILY)
Aqu2.1.18930_001	phenylalanine--trna ligase alpha subunit isoform x2	202	20	3.14692e-138	0.734	5	F:GO:0005524; F:GO:0004812; P:GO:0006418; F:GO:0000049; C:GO:0005737	-	IPR011991 (G3DSA:1.10.10.GENE3D); PTHR11538:SF15 (PANTHER); PTHR11538 (PANTHER); SSF46785 (SUPERFAMILY)
Aqu2.1.19082_001	protein arginine n-methyltransferase 3- partial	396	20	3.20443e-159	0.642	4	F:GO:1901363; F:GO:0097159; F:GO:0016772; F:GO:0005515	-	IPR015915 (G3DSA:2.120.10.GENE3D); PF13415 (PFAM); PTHR23244 (PANTHER); SSF117281 (SUPERFAMILY); SSF117281 (SUPERFAMILY)
Aqu2.1.19096_001	---NA---	250	0			0	-		NON_CYTOPLASMIC_DOMAIN (PHOBIUS); TRANSMEMBRANE (PHOBIUS); SIGNAL_PEPTIDE (PHOBIUS); CYTOPLASMIC_DOMAIN (PHOBIUS); SIGNAL_PEPTIDE_N_REGION (PHOBIUS); SIGNAL_PEPTIDE_C_REGION (PHOBIUS); SIGNAL_PEPTIDE_H_REGION (PHOBIUS); SignalP-noTM (SIGNALP_EUK); SignalP-TM (SIGNALP_GRAM_POSITIVE); TMhelix (TMHMM); TMhelix (TMHMM)
Aqu2.1.19181_001	tpa: zinc finger protein	176	20	3.01404e-50	0.6045	1	F:GO:0046872	-	no IPS match
Aqu2.1.19186_001	PREDICTED: hypothetical protein LOC100639246 [Amphimedon queenslandica]	55	1	6.87386e-20	0.94	0	-		no IPS match
Aqu2.1.19187_001	PREDICTED: hypothetical protein LOC100639246 [Amphimedon queenslandica]	55	1	6.87386e-20	0.94	0	-		no IPS match
Aqu2.1.19197_001	cytochrome p450 26b1-like isoform x1	432	20	0	0.59	5	F:GO:0020037; F:GO:0016705; F:GO:0004497; F:GO:0005506; P:GO:0055114	-	Coil (COILS); IPR002401 (PRINTS); IPR001128 (G3DSA:1.10.630.GENE3D); IPR001128 (PFAM); PTHR24286:SF24 (PANTHER); PTHR24286 (PANTHER); IPR017972 (PROSITE_PATTERNS); CYTOPLASMIC_DOMAIN (PHOBIUS); TRANSMEMBRANE (PHOBIUS); NON_CYTOPLASMIC_DOMAIN (PHOBIUS); IPR001128 (SUPERFAMILY)
Aqu2.1.19236_001	protein capicua homolog	840	20	5.884e-82	0.4885	0	-		PTHR13059:SF1 (PANTHER); PTHR13059 (PANTHER)
Aqu2.1.19237_001	thioredoxin reductase mitochondrial	543	20	0	0.7395	15	P:GO:0055114; C:GO:0030424; C:GO:0005739; C:GO:0030425; P:GO:0030097; P:GO:0007507; C:GO:0043025; F:GO:0042803; P:GO:0000305; F:GO:0004791; P:GO:0006118; P:GO:0006206; P:GO:0045454; F:GO:0050661; F:GO:0050660	EC:1.8.1.9	PR00411 (PRINTS); IPR013027 (PRINTS); G3DSA:3.50.50.60 (GENE3D); IPR004099 (PFAM); IPR023753 (PFAM); G3DSA:3.50.50.60 (GENE3D); IPR006338 (TIGRFAM); IPR004099 (G3DSA:3.30.390.GENE3D); IPR001327 (PFAM); IPR006338 (PTHR22912:PANTHER); PTHR22912 (PANTHER); IPR012999 (PROSITE_PATTERNS); SIGNAL_PEPTIDE_N_REGION (PHOBIUS); SIGNAL_PEPTIDE_C_REGION (PHOBIUS); SIGNAL_PEPTIDE_H_REGION (PHOBIUS); SIGNAL_PEP…
Aqu2.1.19265_001	---NA---	398	0			0	-		TRANSMEMBRANE (PHOBIUS); CYTOPLASMIC_DOMAIN (PHOBIUS); NON_CYTOPLASMIC_DOMAIN (PHOBIUS); TMhelix (TMHMM)
Aqu2.1.19267_001	methyltransferase-like protein 14 homolog	450	20	0	0.777	3	P:GO:0032259; P:GO:0006139; F:GO:0008168	EC:2.1.1.0	IPR007757 (PFAM); PTHR13107:SF0 (PANTHER); PTHR13107 (PANTHER); IPR007757 (PROSITE_PROFILES); PS51592 (PROSITE_PROFILES); SSF53335 (SUPERFAMILY)
Aqu2.1.19336_001	integrator complex subunit 4-like	107	17	3.191e-51	0.666471	7	P:GO:0046132; P:GO:0009209; P:GO:0009150; P:GO:0009220; P:GO:0046128; F:GO:0016787; P:GO:0009205	-	no IPS match
Aqu2.1.19337_001	integrator complex subunit 4-like	107	17	3.191e-51	0.666471	7	P:GO:0046132; P:GO:0009209; P:GO:0009150; P:GO:0009220; P:GO:0046128; F:GO:0016787; P:GO:0009205	-	no IPS match
Aqu2.1.19372_001	protein	318	20	6.63685e-64	0.6125	3	F:GO:0003723; P:GO:0006278; F:GO:0003964		no IPS match
Aqu2.1.19436_001	ubiquitin carboxyl-terminal hydrolase 47-like	789	20	3.16891e-112	0.692	2	P:GO:0007165; F:GO:0005515	-	IPR003590 (SMART); PF13516 (PFAM); G3DSA:3.80.10.10 (GENE3D); IPR020683 (G3DSA:1.25.40.GENE3D); IPR000488 (PFAM); IPR011029 (G3DSA:1.10.533.GENE3D); PTHR24106 (PANTHER); IPR002110 (PROSITE_PROFILES); IPR020683 (PROSITE_PROFILES); IPR000488 (PROSITE_PROFILES); IPR020683 (SUPERFAMILY); IPR011029 (SUPERFAMILY); SSF52047 (SUPERFAMILY)
Aqu2.1.19437_001	ubiquitin carboxyl-terminal hydrolase 47-like	362	20	1.06992e-50	0.655	2	P:GO:0007165; F:GO:0005515	-	IPR000488 (PFAM); IPR011029 (G3DSA:1.10.533.GENE3D); IPR000488 (PROSITE_PROFILES); SSF58104 (SUPERFAMILY); IPR011029 (SUPERFAMILY)
Aqu2.1.19444_001	tyrosine-protein kinase ryk	447	20	0	0.6065	3	F:GO:0004672; P:GO:0006468; F:GO:0005524	-	G3DSA:3.30.200.20 (GENE3D); IPR001245 (PFAM); G3DSA:1.10.510.10 (GENE3D); PTHR24416 (PANTHER); PTHR24416:SF256 (PANTHER); SIGNAL_PEPTIDE (PHOBIUS); SIGNAL_PEPTIDE_H_REGION (PHOBIUS); NON_CYTOPLASMIC_DOMAIN (PHOBIUS); SIGNAL_PEPTIDE_C_REGION (PHOBIUS); SIGNAL_PEPTIDE_N_REGION (PHOBIUS); IPR000719 (PROSITE_PROFILES); SignalP-TM (SIGNALP_GRAM_POSITIVE); SignalP-noTM (SIGNALP_EUK); IPR011009 (SUPERFA…
Aqu2.1.19515_001	---NA---	189	0			0	-		no IPS match
Aqu2.1.19530_001	deleted in malignant brain tumors 1	1204	20	3.28927e-144	0.439	2	C:GO:0016020; F:GO:0005044		IPR001190 (PRINTS); IPR017448 (SMART); IPR001190 (PFAM); G3DSA:3.10.250.10 (GENE3D); PTHR19331:SF151 (PANTHER); PTHR19331 (PANTHER); IPR001190 (PROSITE_PATTERNS); IPR001190 (PROSITE_PATTERNS); CYTOPLASMIC_DOMAIN (PHOBIUS); SIGNAL_PEPTIDE_N_REGION (PHOBIUS); TRANSMEMBRANE (PHOBIUS); NON_CYTOPLASMIC_DOMAIN (PHOBIUS); SIGNAL_PEPTIDE (PHOBIUS); SIGNAL_PEPTIDE_C_REGION (PHOBIUS); SIGNAL_PEPTIDE_H_REGI…
Aqu2.1.19532_001	3-mercaptopyruvate sulfurtransferase-like	309	20	3.00047e-127	0.587	8	F:GO:0004792; F:GO:0016740; F:GO:0008097; C:GO:0005739; P:GO:0051029; C:GO:0005743; P:GO:0035928; C:GO:0005886		IPR001763 (SMART); IPR001763 (PFAM); IPR001763 (G3DSA:3.40.250.GENE3D); PTHR11364 (PANTHER); IPR001763 (PROSITE_PROFILES); IPR001763 (SUPERFAMILY)
Aqu2.1.19534_001	e3 ubiquitin-protein ligase rnf6-like	503	20	0	0.672	4	P:GO:0044238; P:GO:0044260; F:GO:0008270; F:GO:0005515	-	IPR001841 (SMART); IPR001841 (PFAM); IPR013083 (G3DSA:3.30.40.GENE3D); PTHR14155 (PANTHER); IPR001841 (PROSITE_PROFILES); SSF57850 (SUPERFAMILY)
Aqu2.1.19542_001	solute carrier family 15 member 4	486	20	3.91536e-58	0.43	16	C:GO:0016020; P:GO:0006810; F:GO:0005215; P:GO:0006857; F:GO:0015293; C:GO:0016021; P:GO:0015833; P:GO:0015031; P:GO:0008152; F:GO:0008449; F:GO:0003824; F:GO:0008484; P:GO:0030203; P:GO:0055085; P:GO:0030001; F:GO:0046873		G3DSA:1.20.1250.20 (GENE3D); CYTOPLASMIC_DOMAIN (PHOBIUS); TRANSMEMBRANE (PHOBIUS); TRANSMEMBRANE (PHOBIUS); TRANSMEMBRANE (PHOBIUS); NON_CYTOPLASMIC_DOMAIN (PHOBIUS); TRANSMEMBRANE (PHOBIUS); TRANSMEMBRANE (PHOBIUS); NON_CYTOPLASMIC_DOMAIN (PHOBIUS); CYTOPLASMIC_DOMAIN (PHOBIUS); NON_CYTOPLASMIC_DOMAIN (PHOBIUS); TRANSMEMBRANE (PHOBIUS); NON_CYTOPLASMIC_DOMAIN (PHOBIUS); CYTOPLASMIC_DOMAIN (PHOB…
Aqu2.1.19548_001	serine threonine-protein phosphatase 6 regulatory ankyrin repeat subunit a- partial	916	20	6.51917e-121	0.464	1	F:GO:0005515		IPR002110 (SMART); IPR020683 (G3DSA:1.25.40.GENE3D); IPR002110 (PFAM); PF13637 (PFAM); IPR020683 (G3DSA:1.25.40.GENE3D); IPR020683 (PFAM); IPR020683 (G3DSA:1.25.40.GENE3D); PTHR24133:SF3 (PANTHER); PTHR24133 (PANTHER); IPR002110 (PROSITE_PROFILES); IPR002110 (PROSITE_PROFILES); IPR002110 (PROSITE_PROFILES); IPR002110 (PROSITE_PROFILES); IPR002110 (PROSITE_PROFILES); IPR002110 (PROSITE_PROFILES); …
Aqu2.1.19550_001	tetratricopeptide repeat protein 7b-like	496	20	3.3524e-74	0.617	5	P:GO:0009199; P:GO:0009119; F:GO:0016787; P:GO:0009165; P:GO:0009259	-	IPR014716 (G3DSA:3.90.215.GENE3D); TRANSMEMBRANE (PHOBIUS); NON_CYTOPLASMIC_DOMAIN (PHOBIUS); CYTOPLASMIC_DOMAIN (PHOBIUS); IPR002181 (SUPERFAMILY); TMhelix (TMHMM)
Aqu2.1.19566_001	PREDICTED: hypothetical protein LOC100641198 [Amphimedon queenslandica]	423	2	1.4631e-07	0.425	2	P:GO:0007165; F:GO:0005515		IPR011029 (G3DSA:1.10.533.GENE3D); IPR000488 (PROSITE_PROFILES); IPR011029 (SUPERFAMILY)
Aqu2.1.19567_001	ankyrin unc44	987	20	6.57013e-126	0.456	1	F:GO:0005515		IPR002110 (SMART); IPR020683 (PFAM); IPR020683 (G3DSA:1.25.40.GENE3D); PTHR24123:SF2 (PANTHER); PTHR24123 (PANTHER); IPR020683 (PROSITE_PROFILES); IPR002110 (PROSITE_PROFILES); IPR020683 (SUPERFAMILY)
Aqu2.1.19570_001	PREDICTED: hypothetical protein LOC100638531 [Amphimedon queenslandica]	712	1	8.84634e-180	0.77	1	F:GO:0005515		IPR013783 (G3DSA:2.60.40.GENE3D); TRANSMEMBRANE (PHOBIUS); SIGNAL_PEPTIDE_N_REGION (PHOBIUS); SIGNAL_PEPTIDE_H_REGION (PHOBIUS); NON_CYTOPLASMIC_DOMAIN (PHOBIUS); SIGNAL_PEPTIDE (PHOBIUS); SIGNAL_PEPTIDE_C_REGION (PHOBIUS); CYTOPLASMIC_DOMAIN (PHOBIUS); IPR003961 (PROSITE_PROFILES); IPR003961 (SUPERFAMILY); TMhelix (TMHMM); TMhelix (TMHMM); TMhelix (TMHMM)
Aqu2.1.19577_001	---NA---	75	0			0	-		TMhelix (TMHMM)
Aqu2.1.19630_001	ceramide synthase 1	255	20	9.34347e-152	0.607	1	C:GO:0016021		IPR006634 (SMART); IPR006634 (PFAM); PTHR12560 (PANTHER); PTHR12560:SF0 (PANTHER); NON_CYTOPLASMIC_DOMAIN (PHOBIUS); TRANSMEMBRANE (PHOBIUS); TRANSMEMBRANE (PHOBIUS); NON_CYTOPLASMIC_DOMAIN (PHOBIUS); CYTOPLASMIC_DOMAIN (PHOBIUS); NON_CYTOPLASMIC_DOMAIN (PHOBIUS); TRANSMEMBRANE (PHOBIUS); TRANSMEMBRANE (PHOBIUS); NON_CYTOPLASMIC_DOMAIN (PHOBIUS); CYTOPLASMIC_DOMAIN (PHOBIUS); TRANSMEMBRANE (PHOBI…
Aqu2.1.19686_001	upf0676	318	20	0	0.6385	3	P:GO:0055114; F:GO:0005506; F:GO:0016706	EC:1.14.11.0	IPR002283 (PRINTS); IPR026992 (PFAM); IPR027443 (G3DSA:2.60.120.GENE3D); IPR005123 (PFAM); PTHR10209 (PANTHER); PTHR10209:SF54 (PANTHER); IPR005123 (PROSITE_PROFILES); SSF51197 (SUPERFAMILY)
Aqu2.1.19693_001	solute carrier family 15 member 4-like	500	9	5.81074e-50	0.448889	8	C:GO:0016020; P:GO:0006810; F:GO:0005215; P:GO:0006857; F:GO:0015293; C:GO:0016021; P:GO:0015833; P:GO:0015031		Coil (COILS); NON_CYTOPLASMIC_DOMAIN (PHOBIUS); NON_CYTOPLASMIC_DOMAIN (PHOBIUS); TRANSMEMBRANE (PHOBIUS); CYTOPLASMIC_DOMAIN (PHOBIUS); CYTOPLASMIC_DOMAIN (PHOBIUS); TRANSMEMBRANE (PHOBIUS); TRANSMEMBRANE (PHOBIUS); NON_CYTOPLASMIC_DOMAIN (PHOBIUS); TRANSMEMBRANE (PHOBIUS); CYTOPLASMIC_DOMAIN (PHOBIUS); CYTOPLASMIC_DOMAIN (PHOBIUS); TRANSMEMBRANE (PHOBIUS); TRANSMEMBRANE (PHOBIUS); CYTOPLASMIC_D…
Aqu2.1.19738_001	PREDICTED: hypothetical protein LOC100641001 [Amphimedon queenslandica]	828	2	1.25773e-78	0.7	2	P:GO:0006869; F:GO:0005319		IPR011030 (G3DSA:1.25.10.GENE3D); IPR001747 (PFAM); IPR015816 (G3DSA:2.30.230.GENE3D); IPR011030 (SUPERFAMILY); IPR015819 (SUPERFAMILY)
Aqu2.1.19751_001	ankyrin repeat-containing	831	20	1.00811e-96	0.493	6	P:GO:0071704; P:GO:0044238; P:GO:0009987; F:GO:0003824; F:GO:0005524; F:GO:0005515	-	IPR002110 (SMART); IPR020683 (PFAM); G3DSA:3.40.50.300 (GENE3D); IPR020683 (G3DSA:1.25.40.GENE3D); PTHR24198 (PANTHER); IPR020683 (PROSITE_PROFILES); IPR027417 (SUPERFAMILY); IPR020683 (SUPERFAMILY)
Aqu2.1.19753_001	protease do-like 14-like	65	20	5.31043e-11	0.6725	2	P:GO:0006508; F:GO:0004252	EC:3.4.21.0	G3DSA:2.40.10.10 (GENE3D); IPR009003 (SUPERFAMILY)
Aqu2.1.19822_001	atp-dependent dna helicase pif1	116	20	2.34781e-23	0.5405	1	P:GO:0006259	-	PTHR23274:SF1 (PANTHER); PTHR23274 (PANTHER)
Aqu2.1.19836_001	uncharacterized protein loc100376482	347	20	5.7943e-115	0.6435	1	P:GO:0044699	-	PTHR31751 (PANTHER)
Aqu2.1.19900_001	acyl-coenzyme a thioesterase 13	240	20	3.50481e-76	0.758	3	F:GO:0047617; P:GO:0051289; C:GO:0005739	EC:3.1.2.20	IPR003736 (TIGRFAM); G3DSA:3.10.129.10 (GENE3D); IPR006683 (PFAM); PTHR21660 (PANTHER); SSF54637 (SUPERFAMILY)
Aqu2.1.19907_001	intraflagellar transport protein 74 homolog	172	3	8.21346e-114	0.626667	0	-		no IPS match
Aqu2.1.19998_001	eukaryotic translation initiation factor 2a isoform x2	583	20	2.05101e-156	0.596	14	P:GO:0031325; F:GO:0005515; F:GO:0003743; P:GO:0010604; P:GO:0019219; F:GO:0043022; P:GO:0006468; C:GO:0005850; F:GO:0000049; P:GO:0042255; P:GO:0030968; C:GO:0005851; C:GO:0005840; P:GO:0006446	-	Coil (COILS); IPR011659 (PFAM); IPR011042 (G3DSA:2.120.10.GENE3D); IPR013979 (PFAM); PTHR13227:SF0 (PANTHER); PTHR13227 (PANTHER); SSF82171 (SUPERFAMILY)
Aqu2.1.20004_001	serine threonine-protein phosphatase 6 regulatory ankyrin repeat subunit b-like	701	17	8.49898e-163	0.512941	1	F:GO:0005515		IPR020683 (G3DSA:1.25.40.GENE3D); IPR020683 (PROSITE_PROFILES); IPR002110 (PROSITE_PROFILES)
Aqu2.1.20027_001	delta-like protein a-like	1171	20	0	0.5925	12	P:GO:0009888; P:GO:0007219; P:GO:0048568; P:GO:0007389; C:GO:0044464; F:GO:0005509; C:GO:0016021; P:GO:0048468; P:GO:0043009; P:GO:0048839; P:GO:0030182; F:GO:0005515	-	PR00010 (PRINTS); IPR000742 (SMART); IPR001774 (SMART); IPR001881 (SMART); IPR001774 (PFAM); IPR000742 (PFAM); IPR011651 (PFAM); G3DSA:2.10.25.10 (GENE3D); G3DSA:2.10.25.10 (GENE3D); PTHR24044 (PANTHER); IPR013032 (PROSITE_PATTERNS); IPR013032 (PROSITE_PATTERNS); IPR013032 (PROSITE_PATTERNS); IPR013032 (PROSITE_PATTERNS); IPR013032 (PROSITE_PATTERNS); IPR013032 (PROSITE_PATTERNS); IPR013032 (PROS…
Aqu2.1.20040_001	nidogen and egf-like domain-containing protein 1-like	2303	20	0	0.645	2	P:GO:0007160; F:GO:0005515	-	IPR003961 (SMART); IPR003886 (SMART); IPR000436 (SMART); IPR003886 (PFAM); IPR013783 (G3DSA:2.60.40.GENE3D); IPR013783 (G3DSA:2.60.40.GENE3D); G3DSA:2.10.70.10 (GENE3D); IPR003961 (PFAM); IPR013783 (G3DSA:2.60.40.GENE3D); IPR000436 (PFAM); IPR013783 (G3DSA:2.60.40.GENE3D); G3DSA:2.10.70.10 (GENE3D); IPR013783 (G3DSA:2.60.40.GENE3D); PTHR19325 (PANTHER); CYTOPLASMIC_DOMAIN (PHOBIUS); TRANSMEMBRANE…
Aqu2.1.20056_001	zinc finger mym-type protein 3	450	20	1.33609e-60	0.5525	3	P:GO:0006310; F:GO:0003677; P:GO:0015074		IPR021893 (PFAM); IPR013762 (G3DSA:1.10.443.GENE3D); IPR011010 (SUPERFAMILY)
Aqu2.1.20068_001	nadph oxidase 5-like	1410	20	1.83463e-137	0.599	5	P:GO:0044763; P:GO:0044260; P:GO:0050794; F:GO:0003824; P:GO:0019538	-	Coil (COILS); IPR011029 (G3DSA:1.10.533.GENE3D); CYTOPLASMIC_DOMAIN (PHOBIUS); TRANSMEMBRANE (PHOBIUS); NON_CYTOPLASMIC_DOMAIN (PHOBIUS); TMhelix (TMHMM)
Aqu2.1.20073_001	ankyrin repeat domain-containing protein 50- partial	905	20	3.73366e-63	0.5485	3	F:GO:0005515; P:GO:0009116; F:GO:0003824		Coil (COILS); IPR002110 (SMART); IPR020683 (G3DSA:1.25.40.GENE3D); IPR000845 (PFAM); IPR020683 (PFAM); IPR000845 (G3DSA:3.40.50.GENE3D); PTHR24198 (PANTHER); IPR020683 (PROSITE_PROFILES); IPR002110 (PROSITE_PROFILES); IPR020683 (SUPERFAMILY); SSF53167 (SUPERFAMILY)
Aqu2.1.20082_001	zinc finger bed domain-containing protein 1-like	108	19	1.09242e-10	0.576842	2	F:GO:0046983; F:GO:0003676		IPR008906 (PFAM); IPR012337 (SUPERFAMILY)
Aqu2.1.20092_001	protein	142	20	4.07474e-35	0.545	3	F:GO:0003723; P:GO:0006278; F:GO:0003964		no IPS match
Aqu2.1.20101_001	beta-mannosidase-like	910	20	0	0.597	2	F:GO:0004567; P:GO:0046355	EC:3.2.1.25	IPR006103 (PFAM); IPR006104 (PFAM); IPR013781 (G3DSA:3.20.20.GENE3D); IPR008979 (G3DSA:2.60.120.GENE3D); PTHR10066 (PANTHER); IPR028369 (PTHR10066:PANTHER); SIGNAL_PEPTIDE_H_REGION (PHOBIUS); SIGNAL_PEPTIDE_N_REGION (PHOBIUS); SIGNAL_PEPTIDE_C_REGION (PHOBIUS); NON_CYTOPLASMIC_DOMAIN (PHOBIUS); SIGNAL_PEPTIDE (PHOBIUS); SignalP-noTM (SIGNALP_EUK); IPR006102 (SUPERFAMILY); IPR017853 (SUPERFAMILY);…
Aqu2.1.20189_001	PREDICTED: hypothetical protein LOC100635749, partial [Amphimedon queenslandica]	655	5	1.87907e-66	0.656	1	F:GO:0005515		IPR003961 (SMART); IPR013783 (G3DSA:2.60.40.GENE3D); IPR013783 (G3DSA:2.60.40.GENE3D); TRANSMEMBRANE (PHOBIUS); SIGNAL_PEPTIDE_N_REGION (PHOBIUS); CYTOPLASMIC_DOMAIN (PHOBIUS); SIGNAL_PEPTIDE_C_REGION (PHOBIUS); NON_CYTOPLASMIC_DOMAIN (PHOBIUS); SIGNAL_PEPTIDE_H_REGION (PHOBIUS); SIGNAL_PEPTIDE (PHOBIUS); IPR003961 (PROSITE_PROFILES); IPR003961 (PROSITE_PROFILES); SignalP-noTM (SIGNALP_EUK); IPR0…
Aqu2.1.20209_001	---NA---	133	0			0	-		no IPS match
Aqu2.1.20215_001	---NA---	263	0			0	-		SIGNAL_PEPTIDE_N_REGION (PHOBIUS); SIGNAL_PEPTIDE_C_REGION (PHOBIUS); SIGNAL_PEPTIDE_H_REGION (PHOBIUS); SIGNAL_PEPTIDE (PHOBIUS); NON_CYTOPLASMIC_DOMAIN (PHOBIUS); SignalP-TM (SIGNALP_GRAM_POSITIVE); SignalP-noTM (SIGNALP_GRAM_NEGATIVE); SignalP-noTM (SIGNALP_EUK)
Aqu2.1.20301_001	serine threonine-protein kinase 12- partial	109	3	3.1937e-17	0.646667	2	P:GO:0007165; F:GO:0005515		IPR000488 (PFAM); IPR011029 (G3DSA:1.10.533.GENE3D); IPR000488 (PROSITE_PROFILES); IPR011029 (SUPERFAMILY)
Aqu2.1.20323_001	PREDICTED: hypothetical protein LOC100640893 [Amphimedon queenslandica]	223	1	3.68438e-18	0.59	0	-		SIGNAL_PEPTIDE_N_REGION (PHOBIUS); SIGNAL_PEPTIDE_C_REGION (PHOBIUS); SIGNAL_PEPTIDE_H_REGION (PHOBIUS); SIGNAL_PEPTIDE (PHOBIUS); NON_CYTOPLASMIC_DOMAIN (PHOBIUS); SignalP-TM (SIGNALP_GRAM_POSITIVE); SignalP-noTM (SIGNALP_GRAM_NEGATIVE); SignalP-noTM (SIGNALP_EUK)
Aqu2.1.20333_001	nucleoporin gle1	669	20	1.03208e-153	0.5295	2	P:GO:0016973; C:GO:0005643		Coil (COILS); Coil (COILS); Coil (COILS); IPR012476 (PFAM); PTHR12960:SF0 (PANTHER); IPR012476 (PANTHER); CYTOPLASMIC_DOMAIN (PHOBIUS); NON_CYTOPLASMIC_DOMAIN (PHOBIUS); TRANSMEMBRANE (PHOBIUS); TRANSMEMBRANE (PHOBIUS); CYTOPLASMIC_DOMAIN (PHOBIUS)
Aqu2.1.20336_001	anhydro-n-acetylmuramic acid kinase	407	20	3.00814e-84	0.5885	4	P:GO:0009254; F:GO:0016773; P:GO:0006040; F:GO:0005524	-	IPR005338 (PFAM); G3DSA:3.30.420.40 (GENE3D); PTHR30605 (PANTHER); SSF53067 (SUPERFAMILY)
Aqu2.1.20355_001	e3 ubiquitin-protein ligase hectd1	2122	20	0	0.6305	4	F:GO:0005515; F:GO:0004842; F:GO:0046872; P:GO:0016567		IPR002110 (SMART); IPR000569 (SMART); IPR011989 (G3DSA:1.25.10.GENE3D); IPR012919 (PFAM); IPR020683 (PFAM); G3DSA:3.30.2160.10 (GENE3D); IPR010606 (PFAM); IPR008979 (G3DSA:2.60.120.GENE3D); IPR020683 (G3DSA:1.25.40.GENE3D); IPR000569 (PFAM); PTHR11254:SF75 (PANTHER); PTHR11254 (PANTHER); IPR000569 (PROSITE_PROFILES); IPR010606 (PROSITE_PROFILES); IPR002110 (PROSITE_PROFILES); IPR002110 (PROSITE_P…
Aqu2.1.20441_001	reverse transcriptase	94	20	1.06642e-13	0.671	4	P:GO:0006810; F:GO:0003723; P:GO:0006278; F:GO:0003964	-	IPR000477 (PFAM); PTHR19446 (PANTHER); IPR000477 (PROSITE_PROFILES)
Aqu2.1.20503_001	lim domain kinase 1	719	20	0	0.525	9	P:GO:0032233; C:GO:0043005; F:GO:0005515; F:GO:0008270; C:GO:0043231; C:GO:0005737; P:GO:0006468; F:GO:0005524; F:GO:0004713	-	IPR001245 (PRINTS); IPR001781 (SMART); IPR001245 (PFAM); G3DSA:1.10.510.10 (GENE3D); IPR001781 (PFAM); IPR001781 (G3DSA:2.10.110.GENE3D); IPR001781 (G3DSA:2.10.110.GENE3D); G3DSA:2.30.42.10 (GENE3D); G3DSA:3.30.200.20 (GENE3D); PTHR23257:SF94 (PANTHER); PTHR23257 (PANTHER); IPR008266 (PROSITE_PATTERNS); IPR017441 (PROSITE_PATTERNS); IPR001781 (PROSITE_PATTERNS); IPR001781 (PROSITE_PATTERNS); IPR0…
Aqu2.1.20525_001	fibroblast growth factor receptor 4-like	366	4	1.01641e-174	0.74	1	F:GO:0005515		PF13895 (PFAM); IPR013783 (G3DSA:2.60.40.GENE3D); NON_CYTOPLASMIC_DOMAIN (PHOBIUS); SIGNAL_PEPTIDE_H_REGION (PHOBIUS); SIGNAL_PEPTIDE_N_REGION (PHOBIUS); SIGNAL_PEPTIDE (PHOBIUS); SIGNAL_PEPTIDE_C_REGION (PHOBIUS); IPR007110 (PROSITE_PROFILES); SignalP-noTM (SIGNALP_EUK); SSF48726 (SUPERFAMILY)
Aqu2.1.20538_001	transmembrane protein 17	151	20	3.0549e-100	0.674	4	C:GO:0005886; P:GO:0030030; C:GO:0044425; C:GO:0035869	-	IPR019184 (PFAM); PTHR31456 (PANTHER); TRANSMEMBRANE (PHOBIUS); CYTOPLASMIC_DOMAIN (PHOBIUS); CYTOPLASMIC_DOMAIN (PHOBIUS); CYTOPLASMIC_DOMAIN (PHOBIUS); TRANSMEMBRANE (PHOBIUS); TRANSMEMBRANE (PHOBIUS); TRANSMEMBRANE (PHOBIUS); NON_CYTOPLASMIC_DOMAIN (PHOBIUS); NON_CYTOPLASMIC_DOMAIN (PHOBIUS); TMhelix (TMHMM); TMhelix (TMHMM); TMhelix (TMHMM); TMhelix (TMHMM)
Aqu2.1.20540_001	structure-specific endonuclease subunit slx1-like	274	20	0	0.6425	3	F:GO:0017108; P:GO:0006281; C:GO:0033557	-	IPR000305 (PFAM); PTHR20208 (PANTHER); IPR000305 (PROSITE_PROFILES); IPR027520 (HAMAP); IPR000305 (SUPERFAMILY)
Aqu2.1.20544_001	mfs-type transporter slc18b1	448	20	3.18389e-60	0.5395	2	P:GO:0055085; C:GO:0016021		G3DSA:1.20.1250.20 (GENE3D); IPR011701 (PFAM); PTHR24004:SF6 (PANTHER); PTHR24004 (PANTHER); TRANSMEMBRANE (PHOBIUS); NON_CYTOPLASMIC_DOMAIN (PHOBIUS); TRANSMEMBRANE (PHOBIUS); CYTOPLASMIC_DOMAIN (PHOBIUS); CYTOPLASMIC_DOMAIN (PHOBIUS); TRANSMEMBRANE (PHOBIUS); CYTOPLASMIC_DOMAIN (PHOBIUS); NON_CYTOPLASMIC_DOMAIN (PHOBIUS); TRANSMEMBRANE (PHOBIUS); TRANSMEMBRANE (PHOBIUS); TRANSMEMBRANE (PHOBIUS)…
Aqu2.1.20546_001	protein pelota homolog	384	20	0	0.839	8	F:GO:0004519; P:GO:0007049; F:GO:0046872; C:GO:0005737; P:GO:0051276; C:GO:0005634; P:GO:0051301; P:GO:0008283	-	IPR004405 (TIGRFAM); G3DSA:3.30.1330.30 (GENE3D); IPR005141 (PFAM); IPR005142 (PFAM); IPR005140 (PFAM); IPR004405 (PANTHER); SSF159065 (SUPERFAMILY); SSF53137 (SUPERFAMILY); SSF55315 (SUPERFAMILY)
Aqu2.1.20552_001	uncharacterized protein loc101236297	336	5	6.08322e-10	0.664	0	-		IPR018289 (PFAM)
Aqu2.1.20559_001	dehydrodolichyl diphosphate synthase isoform x1	84	20	2.0255e-49	0.788	1	F:GO:0016765	EC:2.5.1.0	IPR001441 (G3DSA:3.40.1180.GENE3D); IPR001441 (PFAM); IPR001441 (PANTHER); IPR001441 (SUPERFAMILY)
Aqu2.1.20603_001	multidrug and toxin extrusion protein 1-like	833	20	3.46313e-140	0.576	4	P:GO:0006855; C:GO:0016021; F:GO:0015297; F:GO:0015238	-	Coil (COILS); IPR002528 (TIGRFAM); IPR002528 (PFAM); IPR019365 (PFAM); PTHR11206:SF8 (PANTHER); PTHR11206 (PANTHER); TRANSMEMBRANE (PHOBIUS); TRANSMEMBRANE (PHOBIUS); TRANSMEMBRANE (PHOBIUS); CYTOPLASMIC_DOMAIN (PHOBIUS); NON_CYTOPLASMIC_DOMAIN (PHOBIUS); TRANSMEMBRANE (PHOBIUS); TRANSMEMBRANE (PHOBIUS); TRANSMEMBRANE (PHOBIUS); CYTOPLASMIC_DOMAIN (PHOBIUS); TRANSMEMBRANE (PHOBIUS); CYTOPLASMIC_D…
Aqu2.1.20655_001	uncharacterized protein kiaa1467 homolog isoform x1	875	20	0	0.46	0	-		IPR027295 (G3DSA:2.140.10.GENE3D); PTHR21419 (PANTHER); CYTOPLASMIC_DOMAIN (PHOBIUS); NON_CYTOPLASMIC_DOMAIN (PHOBIUS); TRANSMEMBRANE (PHOBIUS); SSF69318 (SUPERFAMILY); TMhelix (TMHMM)
Aqu2.1.20668_001	zinc finger protein glis3	670	20	0	0.698	5	F:GO:0003676; P:GO:0045944; F:GO:0046872; P:GO:0000122; C:GO:0005634	-	IPR015880 (SMART); IPR013087 (G3DSA:3.30.160.GENE3D); IPR007087 (PFAM); PF13465 (PFAM); PTHR19818 (PANTHER); PTHR19818:SF39 (PANTHER); IPR007087 (PROSITE_PATTERNS); IPR007087 (PROSITE_PROFILES); SSF57667 (SUPERFAMILY)
Aqu2.1.20690_001	peptidase m35	349	20	9.25711e-67	0.557	1	F:GO:0008237		IPR024079 (G3DSA:3.40.390.GENE3D); PF14521 (PFAM); NON_CYTOPLASMIC_DOMAIN (PHOBIUS); SIGNAL_PEPTIDE_N_REGION (PHOBIUS); SIGNAL_PEPTIDE (PHOBIUS); SIGNAL_PEPTIDE_C_REGION (PHOBIUS); SIGNAL_PEPTIDE_H_REGION (PHOBIUS); SignalP-noTM (SIGNALP_EUK); SignalP-TM (SIGNALP_GRAM_POSITIVE); SignalP-noTM (SIGNALP_GRAM_NEGATIVE); SSF55486 (SUPERFAMILY)
Aqu2.1.20691_001	extracellular protease	351	20	3.80493e-62	0.557	1	F:GO:0008237		IPR024079 (G3DSA:3.40.390.GENE3D); PF14521 (PFAM); NON_CYTOPLASMIC_DOMAIN (PHOBIUS); SIGNAL_PEPTIDE_N_REGION (PHOBIUS); SIGNAL_PEPTIDE (PHOBIUS); SIGNAL_PEPTIDE_C_REGION (PHOBIUS); SIGNAL_PEPTIDE_H_REGION (PHOBIUS); SignalP-noTM (SIGNALP_EUK); SignalP-TM (SIGNALP_GRAM_POSITIVE); SignalP-noTM (SIGNALP_GRAM_NEGATIVE); SSF55486 (SUPERFAMILY)
Aqu2.1.20694_001	unnamed protein product [Oikopleura dioica]	339	3	2.31952e-09	0.406667	0	-		SIGNAL_PEPTIDE_N_REGION (PHOBIUS); SIGNAL_PEPTIDE (PHOBIUS); SIGNAL_PEPTIDE_C_REGION (PHOBIUS); SIGNAL_PEPTIDE_H_REGION (PHOBIUS); NON_CYTOPLASMIC_DOMAIN (PHOBIUS); SignalP-noTM (SIGNALP_EUK)
Aqu2.1.20720_001	long-chain-fatty-acid-- ligase acsbg2-like isoform x2	620	20	0	0.6455	2	P:GO:0006629; F:GO:0003824	-	G3DSA:2.30.38.10 (GENE3D); IPR000873 (PFAM); G3DSA:3.40.50.980 (GENE3D); PTHR24096 (PANTHER); PTHR24096:SF38 (PANTHER); IPR020845 (PROSITE_PATTERNS); SSF56801 (SUPERFAMILY)
Aqu2.1.20730_001	leukocyte tyrosine kinase receptor-like	518	20	9.3484e-95	0.5735	6	F:GO:0005524; F:GO:0004672; P:GO:0018108; P:GO:0006468; F:GO:0004713; F:GO:0016772		TRANSMEMBRANE (PHOBIUS); NON_CYTOPLASMIC_DOMAIN (PHOBIUS); CYTOPLASMIC_DOMAIN (PHOBIUS); TMhelix (TMHMM)
Aqu2.1.20735_001	ephrin type-a receptor 3-like	507	20	0	0.705	3	F:GO:0004713; P:GO:0018108; F:GO:0005524	EC:2.7.10.0	IPR020635 (SMART); G3DSA:1.10.510.10 (GENE3D); IPR001245 (PFAM); PTHR24418 (PANTHER); IPR000719 (PROSITE_PROFILES); IPR011009 (SUPERFAMILY)
Aqu2.1.20793_001	zinc finger bed domain-containing protein 1-like	99	20	1.3072e-42	0.478	3	F:GO:0003676; F:GO:0046983; F:GO:0003677		SSF140996 (SUPERFAMILY)
Aqu2.1.20806_001	---NA---	50	0			0	-		CYTOPLASMIC_DOMAIN (PHOBIUS); NON_CYTOPLASMIC_DOMAIN (PHOBIUS); TRANSMEMBRANE (PHOBIUS); TMhelix (TMHMM)
Aqu2.1.20840_001	protein mak16 homolog	278	20	0	0.7215	1	C:GO:0005730		IPR006958 (PIRSF); IPR006958 (PFAM); PF01778 (PFAM); IPR006958 (PTHR23405:PANTHER); PTHR23405 (PANTHER)
Aqu2.1.20848_001	nucleotide exchange factor sil1 isoform x1	425	20	0	0.533	1	F:GO:0005488		IPR011989 (G3DSA:1.25.10.GENE3D); IPR013918 (PFAM); PTHR19316:SF1 (PANTHER); PTHR19316 (PANTHER); SIGNAL_PEPTIDE_H_REGION (PHOBIUS); NON_CYTOPLASMIC_DOMAIN (PHOBIUS); SIGNAL_PEPTIDE_C_REGION (PHOBIUS); SIGNAL_PEPTIDE (PHOBIUS); SIGNAL_PEPTIDE_N_REGION (PHOBIUS); SignalP-noTM (SIGNALP_EUK); SignalP-noTM (SIGNALP_GRAM_NEGATIVE); SignalP-TM (SIGNALP_GRAM_POSITIVE); IPR016024 (SUPERFAMILY)
Aqu2.1.20852_001	phosphatidylinositide phosphatase sac2	1282	20	0	0.62	14	P:GO:0032314; C:GO:0001750; P:GO:0032855; C:GO:0005802; F:GO:0042578; C:GO:0044431; F:GO:0030675; P:GO:0046488; C:GO:0005769; P:GO:0042384; F:GO:0048365; C:GO:0030136; C:GO:0005886; C:GO:0005634	-	Coil (COILS); IPR022158 (PFAM); IPR002013 (PFAM); PTHR11200:SF2 (PANTHER); PTHR11200 (PANTHER); NON_CYTOPLASMIC_DOMAIN (PHOBIUS); TRANSMEMBRANE (PHOBIUS); CYTOPLASMIC_DOMAIN (PHOBIUS); NON_CYTOPLASMIC_DOMAIN (PHOBIUS); TRANSMEMBRANE (PHOBIUS); IPR002013 (PROSITE_PROFILES)
Aqu2.1.20885_001	wd repeat-containing protein 63- partial	590	20	3.36157e-177	0.5965	3	P:GO:0006355; F:GO:0003677; C:GO:0005634	-	Coil (COILS); Coil (COILS)
Aqu2.1.20890_001	wd repeat-containing protein 63- partial	369	20	0	0.5915	3	P:GO:0007165; F:GO:0005524; F:GO:0003950		no IPS match
Aqu2.1.20972_001	tripartite motif-containing protein 71-like	115	20	2.20736e-32	0.721	1	F:GO:0005515		IPR011042 (G3DSA:2.120.10.GENE3D); IPR001258 (PFAM); PTHR24103 (PANTHER); PTHR24103:SF0 (PANTHER); IPR013017 (PROSITE_PROFILES); SSF63829 (SUPERFAMILY)
Aqu2.1.20973_001	tyrosine-protein kinase fyn-like	766	20	0	0.5455	2	F:GO:0016740; F:GO:0005515	-	Coil (COILS); IPR001452 (SMART); G3DSA:2.30.30.40 (GENE3D); IPR001452 (PFAM); G3DSA:3.80.10.10 (GENE3D); IPR001452 (PROSITE_PROFILES); IPR001452 (SUPERFAMILY); SSF52047 (SUPERFAMILY)
Aqu2.1.21018_001	recq-mediated genome instability protein 1	342	20	2.08865e-163	0.5855	1	F:GO:0005515	-	IPR013894 (PFAM); PTHR14790 (PANTHER)
Aqu2.1.21024_001	peptidyl-prolyl cis-trans isomerase-like 6-like	306	20	0	0.5845	3	P:GO:0006457; P:GO:0000413; F:GO:0003755	EC:5.2.1.8	IPR002130 (PRINTS); G3DSA:2.40.100.10 (GENE3D); IPR002130 (PFAM); PTHR11071:SF51 (PANTHER); PTHR11071 (PANTHER); IPR002130 (PROSITE_PROFILES); IPR002130 (SUPERFAMILY)
Aqu2.1.21027_001	brain protein 44-like	103	20	2.46392e-70	0.812	2	C:GO:0005743; P:GO:0006850	-	IPR005336 (PFAM); PTHR14154 (PANTHER); PTHR14154:SF3 (PANTHER); NON_CYTOPLASMIC_DOMAIN (PHOBIUS); TRANSMEMBRANE (PHOBIUS); CYTOPLASMIC_DOMAIN (PHOBIUS)
Aqu2.1.21047_001	---NA---	483	0			0	-		SIGNAL_PEPTIDE_N_REGION (PHOBIUS); CYTOPLASMIC_DOMAIN (PHOBIUS); SIGNAL_PEPTIDE_C_REGION (PHOBIUS); TRANSMEMBRANE (PHOBIUS); SIGNAL_PEPTIDE (PHOBIUS); NON_CYTOPLASMIC_DOMAIN (PHOBIUS); SIGNAL_PEPTIDE_H_REGION (PHOBIUS); SignalP-noTM (SIGNALP_EUK); TMhelix (TMHMM)
Aqu2.1.21048_001	---NA---	521	0			0	-		NON_CYTOPLASMIC_DOMAIN (PHOBIUS); CYTOPLASMIC_DOMAIN (PHOBIUS); TRANSMEMBRANE (PHOBIUS); CYTOPLASMIC_DOMAIN (PHOBIUS); TRANSMEMBRANE (PHOBIUS)
Aqu2.1.21050_001	---NA---	78	0			0	-		no IPS match
Aqu2.1.21065_001	histone deacetylase 11	280	20	0	0.767	1	F:GO:0016787	-	IPR000286 (PRINTS); IPR023801 (G3DSA:3.40.800.GENE3D); IPR023801 (PFAM); IPR000286 (PANTHER); PTHR10625:SF9 (PANTHER); SSF52768 (SUPERFAMILY)
Aqu2.1.21069_001	espin	668	20	0	0.5155	1	F:GO:0005515		Coil (COILS); Coil (COILS); IPR002110 (PRINTS); IPR002110 (SMART); IPR020683 (G3DSA:1.25.40.GENE3D); IPR020683 (PFAM); PTHR24153 (PANTHER); IPR002110 (PROSITE_PROFILES); IPR020683 (PROSITE_PROFILES); IPR020683 (SUPERFAMILY)
Aqu2.1.21070_001	proactivator polypeptide	899	20	0	0.4425	1	P:GO:0006629	-	Coil (COILS); IPR003119 (SMART); IPR008139 (SMART); IPR011001 (G3DSA:1.10.225.GENE3D); IPR007856 (PFAM); IPR011001 (G3DSA:1.10.225.GENE3D); IPR008138 (PFAM); IPR011001 (G3DSA:1.10.225.GENE3D); IPR003119 (PFAM); IPR011001 (G3DSA:1.10.225.GENE3D); PTHR11480:SF3 (PANTHER); PTHR11480 (PANTHER); SIGNAL_PEPTIDE_N_REGION (PHOBIUS); SIGNAL_PEPTIDE (PHOBIUS); SIGNAL_PEPTIDE_C_REGION (PHOBIUS); SIGNAL_PEPT…
Aqu2.1.21080_001	loc779081 protein	2780	20	0	0.809	8	C:GO:0005737; P:GO:0001955; F:GO:0003723; P:GO:0051151; P:GO:0019048; C:GO:0005634; P:GO:0007492; F:GO:0005515	-	Coil (COILS); IPR002110 (PRINTS); IPR001660 (SMART); IPR002110 (SMART); IPR004087 (SMART); IPR013761 (G3DSA:1.10.150.GENE3D); G3DSA:3.30.1370.10 (GENE3D); IPR004088 (PFAM); IPR002110 (PFAM); IPR020683 (G3DSA:1.25.40.GENE3D); IPR020683 (PFAM); IPR020683 (G3DSA:1.25.40.GENE3D); IPR020683 (G3DSA:1.25.40.GENE3D); IPR020683 (G3DSA:1.25.40.GENE3D); IPR021129 (PFAM); PTHR23206:SF0 (PANTHER); PTHR23206 (…
Aqu2.1.21089_001	plexin- partial	362	20	9.7235e-34	0.557	6	C:GO:0016021; P:GO:0007165; P:GO:0007275; F:GO:0004872; C:GO:0005622; P:GO:0016539	-	IPR016201 (SMART); IPR002165 (PFAM); G3DSA:3.30.1680.10 (GENE3D); IPR006141 (PROSITE_PROFILES); IPR016201 (SUPERFAMILY)
Aqu2.1.21091_001	plexin-b	1811	20	0	0.438	7	P:GO:0009653; C:GO:0016020; P:GO:0007165; P:GO:0044767; P:GO:0007399; F:GO:0004872; F:GO:0005515	-	Coil (COILS); Coil (COILS); IPR016201 (SMART); IPR002909 (SMART); G3DSA:3.30.1680.10 (GENE3D); IPR013783 (G3DSA:2.60.40.GENE3D); IPR013783 (G3DSA:2.60.40.GENE3D); IPR013783 (G3DSA:2.60.40.GENE3D); IPR002909 (PFAM); G3DSA:3.30.1680.10 (GENE3D); IPR002165 (PFAM); PTHR22625 (PANTHER); PTHR22625:SF16 (PANTHER); TRANSMEMBRANE (PHOBIUS); CYTOPLASMIC_DOMAIN (PHOBIUS); NON_CYTOPLASMIC_DOMAIN (PHOBIUS); T…
Aqu2.1.21164_001	lipase maturation factor 2-like	1559	20	0	0.626	2	F:GO:0008270; F:GO:0005515		Coil (COILS); IPR001841 (SMART); IPR013083 (G3DSA:3.30.40.GENE3D); PF02176 (PFAM); PF13923 (PFAM); IPR009613 (PFAM); PTHR14463 (PANTHER); PTHR14463:SF5 (PANTHER); IPR017907 (PROSITE_PATTERNS); TRANSMEMBRANE (PHOBIUS); NON_CYTOPLASMIC_DOMAIN (PHOBIUS); TRANSMEMBRANE (PHOBIUS); TRANSMEMBRANE (PHOBIUS); CYTOPLASMIC_DOMAIN (PHOBIUS); NON_CYTOPLASMIC_DOMAIN (PHOBIUS); TRANSMEMBRANE (PHOBIUS); TRANSMEM…
Aqu2.1.21167_001	---NA---	118	0			0	-		Coil (COILS); Coil (COILS)
Aqu2.1.21200_001	tetratricopeptide repeat protein 18-like	1130	20	0	0.54	1	F:GO:0005515		IPR019734 (SMART); IPR011716 (PFAM); IPR011990 (G3DSA:1.25.40.GENE3D); IPR013105 (PFAM); PTHR23083 (PANTHER); PTHR23083:SF192 (PANTHER); IPR013026 (PROSITE_PROFILES); SSF48452 (SUPERFAMILY)
Aqu2.1.21201_001	acylphosphatase-2-like isoform x1	58	20	3.75804e-12	0.7035	1	F:GO:0003998		IPR020456 (PRINTS); G3DSA:3.30.70.100 (GENE3D); IPR001792 (PFAM); PTHR10029 (PANTHER); IPR017968 (PROSITE_PATTERNS); IPR017968 (PROSITE_PATTERNS); IPR001792 (PROSITE_PROFILES); IPR001792 (SUPERFAMILY)
Aqu2.1.21212_001	ras-specific guanine nucleotide-releasing factor 2	452	20	2.00424e-19	0.552	3	C:GO:0005622; P:GO:0007264; F:GO:0005085		Coil (COILS); IPR001895 (G3DSA:1.10.840.GENE3D); PTHR23113:SF43 (PANTHER); IPR008937 (PANTHER); IPR023578 (SUPERFAMILY); SSF50729 (SUPERFAMILY)
Aqu2.1.21216_001	HES1	514	20	0	0.634	23	P:GO:0045892; P:GO:0006357; P:GO:2000026; P:GO:0006811; P:GO:0016043; P:GO:0048738; P:GO:0003008; P:GO:0007165; P:GO:0055001; P:GO:0060411; P:GO:0003179; P:GO:0048518; P:GO:0048646; P:GO:0048844; C:GO:0016021; P:GO:0051145; F:GO:0003677; F:GO:0005216; C:GO:0005634; P:GO:0003208; P:GO:0055085; P:GO:0014031; F:GO:0046983	-	IPR011598 (SMART); IPR011598 (G3DSA:4.10.280.GENE3D); IPR011598 (PFAM); PTHR10985 (PANTHER); IPR011598 (PROSITE_PROFILES); IPR011598 (SUPERFAMILY)
Aqu2.1.21229_001	uncharacterized protein c1orf112 homolog	901	20	2.7013e-171	0.461	4	P:GO:0010138; P:GO:0046132; F:GO:0000166; F:GO:0016301	-	IPR027902 (PFAM); PTHR16071 (PANTHER); TRANSMEMBRANE (PHOBIUS); NON_CYTOPLASMIC_DOMAIN (PHOBIUS); CYTOPLASMIC_DOMAIN (PHOBIUS)
Aqu2.1.21230_001	uridine-cytidine kinase 2	252	20	1.37093e-176	0.766	14	F:GO:0005515; C:GO:0043231; P:GO:0016579; F:GO:0004849; F:GO:0016773; P:GO:0016310; P:GO:0044206; C:GO:0005829; P:GO:0048678; P:GO:0044211; P:GO:0007631; F:GO:0005524; P:GO:0071453; P:GO:0006206	EC:2.7.1.48; EC:2.7.1.0	IPR000764 (PRINTS); IPR006083 (PFAM); IPR000764 (TIGRFAM); G3DSA:3.40.50.300 (GENE3D); PTHR10285 (PANTHER); PTHR10285:SF28 (PANTHER); IPR027417 (SUPERFAMILY)
Aqu2.1.21231_001	tm2 domain-containing protein cg11103	191	20	1.67046e-132	0.658	3	F:GO:0003674; P:GO:0008150; C:GO:0005575		IPR007829 (PFAM); PTHR21016 (PANTHER); TRANSMEMBRANE (PHOBIUS); NON_CYTOPLASMIC_DOMAIN (PHOBIUS); SIGNAL_PEPTIDE_N_REGION (PHOBIUS); TRANSMEMBRANE (PHOBIUS); SIGNAL_PEPTIDE_H_REGION (PHOBIUS); SIGNAL_PEPTIDE (PHOBIUS); CYTOPLASMIC_DOMAIN (PHOBIUS); NON_CYTOPLASMIC_DOMAIN (PHOBIUS); SIGNAL_PEPTIDE_C_REGION (PHOBIUS); SignalP-noTM (SIGNALP_EUK); TMhelix (TMHMM); TMhelix (TMHMM)
Aqu2.1.21235_001	calcineurin catalytic subunit	732	20	0	0.6065	2	F:GO:0016787; F:GO:0005509		IPR006186 (PRINTS); IPR002048 (SMART); IPR006186 (SMART); IPR011992 (G3DSA:1.10.238.GENE3D); IPR011992 (PFAM); IPR004843 (PFAM); G3DSA:3.60.21.10 (GENE3D); IPR011992 (G3DSA:1.10.238.GENE3D); PTHR11668:SF118 (PANTHER); PTHR11668 (PANTHER); IPR018247 (PROSITE_PATTERNS); IPR006186 (PROSITE_PATTERNS); IPR018247 (PROSITE_PATTERNS); IPR002048 (PROSITE_PROFILES); IPR002048 (PROSITE_PROFILES); SSF56300 (…
Aqu2.1.21241_001	cre-mig-6 protein	698	20	1.16822e-64	0.431	3	P:GO:0048856; P:GO:0044767; P:GO:0007275	-	IPR000884 (SMART); IPR000884 (PFAM); G3DSA:2.20.100.10 (GENE3D); PTHR13723 (PANTHER); PTHR13723:SF4 (PANTHER); SIGNAL_PEPTIDE_C_REGION (PHOBIUS); SIGNAL_PEPTIDE (PHOBIUS); SIGNAL_PEPTIDE_N_REGION (PHOBIUS); SIGNAL_PEPTIDE_H_REGION (PHOBIUS); NON_CYTOPLASMIC_DOMAIN (PHOBIUS); IPR000884 (PROSITE_PROFILES); IPR000884 (PROSITE_PROFILES); IPR000884 (PROSITE_PROFILES); IPR000884 (PROSITE_PROFILES); IPR…
Aqu2.1.21260_001	threonine--trna cytoplasmic	704	20	0	0.8175	7	P:GO:0006435; F:GO:0004829; F:GO:0005524; C:GO:0005737; P:GO:0006544; P:GO:0006563; P:GO:0006566	EC:6.1.1.3	IPR002320 (PRINTS); IPR012947 (SMART); IPR012675 (G3DSA:3.10.20.GENE3D); IPR002320 (TIGRFAM); G3DSA:3.30.54.20 (GENE3D); IPR002314 (PFAM); G3DSA:3.30.930.10 (GENE3D); G3DSA:3.30.980.10 (GENE3D); IPR004154 (G3DSA:3.40.50.GENE3D); IPR012947 (PFAM); IPR004154 (PFAM); IPR004095 (PFAM); PTHR11451 (PANTHER); PTHR11451:SF5 (PANTHER); IPR002320 (HAMAP); IPR006195 (PROSITE_PROFILES); SSF55681 (SUPERFAMILY…
Aqu2.1.21261_001	comm domain-containing protein 10	199	20	3.23266e-139	0.686	0	-		IPR009886 (PFAM); PTHR12333:SF0 (PANTHER); PTHR12333 (PANTHER); IPR017920 (PROSITE_PROFILES)
Aqu2.1.21268_001	immunoglobulin i-set domain-containing protein	442	20	3.84791e-177	0.4715	2	C:GO:0016020; F:GO:0005515	-	IPR003599 (SMART); IPR003598 (SMART); IPR013783 (G3DSA:2.60.40.GENE3D); PF13895 (PFAM); IPR013783 (G3DSA:2.60.40.GENE3D); PTHR10489 (PANTHER); IPR007110 (PROSITE_PROFILES); IPR007110 (PROSITE_PROFILES); SSF48726 (SUPERFAMILY); SSF48726 (SUPERFAMILY); SSF48726 (SUPERFAMILY)
Aqu2.1.21357_001	hypothetical protein BRAFLDRAFT_70615 [Branchiostoma floridae]	145	2	4.98146e-05	0.47	6	F:GO:0005509; P:GO:0007155; C:GO:0016020; F:GO:0003735; C:GO:0005763; F:GO:0008270		no IPS match
Aqu2.1.21358_001	hypothetical protein BRAFLDRAFT_70615 [Branchiostoma floridae]	145	2	4.98146e-05	0.47	6	F:GO:0005509; P:GO:0007155; C:GO:0016020; F:GO:0003735; C:GO:0005763; F:GO:0008270		no IPS match
Aqu2.1.21429_001	wd repeat-containing protein 63- partial	516	20	4.12973e-48	0.5105	4	P:GO:0006869; P:GO:0042157; F:GO:0008289; C:GO:0005576		IPR008405 (PFAM); TRANSMEMBRANE (PHOBIUS); CYTOPLASMIC_DOMAIN (PHOBIUS); TRANSMEMBRANE (PHOBIUS); CYTOPLASMIC_DOMAIN (PHOBIUS); NON_CYTOPLASMIC_DOMAIN (PHOBIUS); TMhelix (TMHMM); TMhelix (TMHMM)
Aqu2.1.21431_001	PREDICTED: hypothetical protein LOC100638228 [Amphimedon queenslandica]	1344	20	0	0.554	2	P:GO:0007165; F:GO:0016740	-	Coil (COILS); IPR003590 (SMART); G3DSA:3.80.10.10 (GENE3D); PTHR24106 (PANTHER); SSF52047 (SUPERFAMILY)
Aqu2.1.21444_001	---NA---	97	0			0	-		no IPS match
Aqu2.1.21460_001	uncharacterized protein loc101887066	282	20	3.9787e-34	0.5335	1	F:GO:0046872		PTHR31912:SF1 (PANTHER); PTHR31912 (PANTHER)
Aqu2.1.21475_001	PREDICTED: hypothetical protein LOC100640716, partial [Amphimedon queenslandica]	1178	20	0	0.5655	2	P:GO:0007165; F:GO:0005515	-	IPR000488 (PFAM); IPR011029 (G3DSA:1.10.533.GENE3D); G3DSA:3.40.50.300 (GENE3D); IPR000488 (PROSITE_PROFILES); IPR011029 (SUPERFAMILY); IPR027417 (SUPERFAMILY)
Aqu2.1.21476_001	solute carrier family 15 member 4-like	488	20	9.7705e-57	0.428	13	C:GO:0016020; P:GO:0006810; F:GO:0005215; P:GO:0008152; F:GO:0008449; F:GO:0003824; F:GO:0008484; P:GO:0030203; P:GO:0006857; F:GO:0015293; C:GO:0016021; P:GO:0015833; P:GO:0015031		TRANSMEMBRANE (PHOBIUS); NON_CYTOPLASMIC_DOMAIN (PHOBIUS); CYTOPLASMIC_DOMAIN (PHOBIUS); TRANSMEMBRANE (PHOBIUS); CYTOPLASMIC_DOMAIN (PHOBIUS); NON_CYTOPLASMIC_DOMAIN (PHOBIUS); TRANSMEMBRANE (PHOBIUS); NON_CYTOPLASMIC_DOMAIN (PHOBIUS); TRANSMEMBRANE (PHOBIUS); TRANSMEMBRANE (PHOBIUS); TRANSMEMBRANE (PHOBIUS); CYTOPLASMIC_DOMAIN (PHOBIUS); NON_CYTOPLASMIC_DOMAIN (PHOBIUS); TRANSMEMBRANE (PHOBIUS)…
Aqu2.1.21509_001	tpa: zinc finger protein	242	20	3.30716e-86	0.59	1	F:GO:0046872		no IPS match
Aqu2.1.21511_001	PREDICTED: hypothetical protein LOC100636843 [Amphimedon queenslandica]	74	1	4.54949e-27	0.85	0	-		no IPS match
Aqu2.1.21523_001	deleted in malignant brain tumors 1	2776	20	0	0.5675	5	C:GO:0016020; F:GO:0005044; F:GO:0005515; P:GO:0006955; F:GO:0030247		IPR001190 (PRINTS); IPR003961 (SMART); IPR017448 (SMART); IPR013783 (G3DSA:2.60.40.GENE3D); IPR003961 (PFAM); G3DSA:3.10.250.10 (GENE3D); IPR001190 (PFAM); IPR013783 (G3DSA:2.60.40.GENE3D); PTHR19331:SF192 (PANTHER); PTHR19331 (PANTHER); IPR001190 (PROSITE_PATTERNS); IPR001190 (PROSITE_PATTERNS); IPR001190 (PROSITE_PATTERNS); IPR001190 (PROSITE_PATTERNS); IPR001190 (PROSITE_PATTERNS); IPR001190 (…
Aqu2.1.21528_001	tyrosine-protein kinase fer	318	20	0	0.471	6	F:GO:0016772; P:GO:0007166; C:GO:0044424; P:GO:0071310; F:GO:0005488; P:GO:0006468	-	IPR001060 (PFAM); IPR001060 (PROSITE_PROFILES); SSF103657 (SUPERFAMILY)
Aqu2.1.21531_001	dynein heavy chain axonemal	4683	20	0	0.5125	3	C:GO:0030286; F:GO:0003777; P:GO:0007018		Coil (COILS); Coil (COILS); Coil (COILS); Coil (COILS); Coil (COILS); PF12781 (PFAM); IPR004273 (PFAM); PF12774 (PFAM); PF12775 (PFAM); IPR024317 (PFAM); G3DSA:3.40.50.300 (GENE3D); IPR013602 (PFAM); IPR013594 (PFAM); PTHR10676:SF137 (PANTHER); IPR026983 (PANTHER); IPR027417 (SUPERFAMILY)
Aqu2.1.21532_001	uncharacterized protein partial	102	10	5.50159e-08	0.564	1	F:GO:0003676		no IPS match
Aqu2.1.21534_001	---NA---	60	0			0	-		no IPS match
Aqu2.1.21535_001	multidrug resistance-associated protein 4 isoform x2	561	20	1.06509e-52	0.4995	2	F:GO:0005524; F:GO:0016887		IPR007497 (PFAM); G3DSA:3.40.50.300 (GENE3D); IPR003439 (PFAM); PTHR24223 (PANTHER); IPR017871 (PROSITE_PATTERNS); CYTOPLASMIC_DOMAIN (PHOBIUS); TRANSMEMBRANE (PHOBIUS); TRANSMEMBRANE (PHOBIUS); NON_CYTOPLASMIC_DOMAIN (PHOBIUS); TRANSMEMBRANE (PHOBIUS); CYTOPLASMIC_DOMAIN (PHOBIUS); NON_CYTOPLASMIC_DOMAIN (PHOBIUS); IPR003439 (PROSITE_PROFILES); IPR027417 (SUPERFAMILY)
Aqu2.1.21549_001	---NA---	102	0			0	-		no IPS match
Aqu2.1.21552_001	---NA---	371	0			0	-		NON_CYTOPLASMIC_DOMAIN (PHOBIUS); SIGNAL_PEPTIDE_N_REGION (PHOBIUS); CYTOPLASMIC_DOMAIN (PHOBIUS); TRANSMEMBRANE (PHOBIUS); SIGNAL_PEPTIDE_C_REGION (PHOBIUS); SIGNAL_PEPTIDE (PHOBIUS); SIGNAL_PEPTIDE_H_REGION (PHOBIUS); SignalP-TM (SIGNALP_GRAM_NEGATIVE); SignalP-TM (SIGNALP_EUK); SignalP-TM (SIGNALP_GRAM_POSITIVE); TMhelix (TMHMM); TMhelix (TMHMM)
Aqu2.1.21566_001	kinesin-like protein kifc3-like	753	20	0	0.662	7	F:GO:0008017; P:GO:0007018; F:GO:0005524; C:GO:0005871; F:GO:0003777; C:GO:0005874; C:GO:0045298	-	Coil (COILS); Coil (COILS); IPR001752 (PRINTS); IPR001752 (SMART); IPR001752 (G3DSA:3.40.850.GENE3D); IPR001752 (PFAM); IPR027640 (PANTHER); IPR019821 (PROSITE_PATTERNS); IPR001752 (PROSITE_PROFILES); IPR027417 (SUPERFAMILY)
Aqu2.1.21570_001	ankyrin repeat protein rbe_0317-like	794	20	9.12858e-87	0.504	3	F:GO:0005524; F:GO:0005515; P:GO:0007165	-	IPR002110 (SMART); IPR020683 (PFAM); G3DSA:3.40.50.300 (GENE3D); IPR011029 (G3DSA:1.10.533.GENE3D); IPR020683 (G3DSA:1.25.40.GENE3D); IPR020675 (PANTHER); IPR015725 (PTHR22964:PANTHER); IPR000488 (PROSITE_PROFILES); IPR020683 (PROSITE_PROFILES); IPR002110 (PROSITE_PROFILES); IPR011029 (SUPERFAMILY); IPR027417 (SUPERFAMILY); IPR020683 (SUPERFAMILY)
Aqu2.1.21651_001	pif1p	181	20	2.39852e-21	0.6785	2	F:GO:0004386; F:GO:0005524		G3DSA:3.40.50.300 (GENE3D); IPR003840 (PFAM); PTHR23274 (PANTHER); IPR027417 (SUPERFAMILY)
Aqu2.1.21655_001	---NA---	164	0			0	-		no IPS match
Aqu2.1.21658_001	lon protease mitochondrial	73	20	3.97266e-33	0.822	5	F:GO:0004252; F:GO:0005524; F:GO:0004176; P:GO:0006515; P:GO:0006510	EC:3.4.21.0	no IPS match
Aqu2.1.21683_001	ubiquitin-conjugating enzyme e2 q2-like	401	20	0	0.6525	1	F:GO:0016881	EC:6.3.2.0	SM00212 (SMART); IPR000608 (PFAM); IPR016135 (G3DSA:3.10.110.GENE3D); PTHR24068:SF3 (PANTHER); PTHR24068 (PANTHER); IPR000608 (PROSITE_PROFILES); IPR016135 (SUPERFAMILY)
Aqu2.1.21689_001	ankyrin repeat-containing	902	20	1.02869e-83	0.474	1	F:GO:0005515		IPR002110 (SMART); IPR020683 (PFAM); IPR020683 (G3DSA:1.25.40.GENE3D); PF13857 (PFAM); IPR020683 (G3DSA:1.25.40.GENE3D); PTHR24198 (PANTHER); IPR020683 (PROSITE_PROFILES); IPR002110 (PROSITE_PROFILES); IPR002110 (PROSITE_PROFILES); IPR020683 (SUPERFAMILY); IPR020683 (SUPERFAMILY)
Aqu2.1.21723_001	thrombospondin-2	1090	20	0	0.5435	8	F:GO:0005515; F:GO:0005509; P:GO:0007155; C:GO:0005615; P:GO:0016525; P:GO:0006954; F:GO:0050840; F:GO:0008201		PR01705 (PRINTS); IPR000742 (SMART); IPR000884 (SMART); IPR001881 (SMART); IPR001881 (PFAM); G3DSA:2.10.25.10 (GENE3D); IPR000884 (PFAM); IPR013320 (G3DSA:2.60.120.GENE3D); G3DSA:2.20.100.10 (GENE3D); G3DSA:2.10.25.10 (GENE3D); IPR008859 (PFAM); G3DSA:4.10.1080.10 (GENE3D); IPR003367 (PFAM); IPR028499 (PTHR10199:PANTHER); PTHR10199 (PANTHER); IPR018097 (PROSITE_PATTERNS); IPR018097 (PROSITE_PATTE…
Aqu2.1.21725_001	tyrosine-protein kinase transmembrane receptor ror2	389	20	9.65601e-62	0.4635	5	P:GO:0007165; P:GO:0032502; F:GO:0005515; P:GO:0006468; F:GO:0004672	-	PR00018 (PRINTS); IPR000001 (SMART); IPR020067 (PFAM); IPR000001 (PFAM); IPR000001 (G3DSA:2.40.20.GENE3D); G3DSA:1.10.510.10 (GENE3D); IPR001245 (PFAM); PTHR24272 (PANTHER); IPR018056 (PROSITE_PATTERNS); SIGNAL_PEPTIDE_H_REGION (PHOBIUS); NON_CYTOPLASMIC_DOMAIN (PHOBIUS); SIGNAL_PEPTIDE_N_REGION (PHOBIUS); SIGNAL_PEPTIDE_C_REGION (PHOBIUS); SIGNAL_PEPTIDE (PHOBIUS); IPR020067 (PROSITE_PROFILES); …
Aqu2.1.21742_001	u-box domain-containing protein 33-like	1463	20	0	0.651	4	F:GO:0004672; P:GO:0006468; F:GO:0005515; F:GO:0005524	-	Coil (COILS); Coil (COILS); Coil (COILS); Coil (COILS); PF13418 (PFAM); IPR015915 (G3DSA:2.120.10.GENE3D); G3DSA:3.30.200.20 (GENE3D); G3DSA:1.10.510.10 (GENE3D); IPR000719 (PFAM); IPR015916 (G3DSA:2.130.10.GENE3D); PTHR23257 (PANTHER); IPR017441 (PROSITE_PATTERNS); CYTOPLASMIC_DOMAIN (PHOBIUS); TRANSMEMBRANE (PHOBIUS); NON_CYTOPLASMIC_DOMAIN (PHOBIUS); IPR000719 (PROSITE_PROFILES); IPR011009 (SU…
Aqu2.1.21746_001	PREDICTED: hypothetical protein LOC100640170 [Amphimedon queenslandica]	379	3	4.39602e-18	0.49	0	-		TRANSMEMBRANE (PHOBIUS); NON_CYTOPLASMIC_DOMAIN (PHOBIUS); CYTOPLASMIC_DOMAIN (PHOBIUS); TMhelix (TMHMM)
Aqu2.1.21756_001	transient receptor potential cation channel subfamily a member 1 homolog	985	8	6.27907e-40	0.47375	1	P:GO:0006810	-	IPR006626 (SMART); CYTOPLASMIC_DOMAIN (PHOBIUS); NON_CYTOPLASMIC_DOMAIN (PHOBIUS); TRANSMEMBRANE (PHOBIUS); TRANSMEMBRANE (PHOBIUS); TRANSMEMBRANE (PHOBIUS); CYTOPLASMIC_DOMAIN (PHOBIUS); TRANSMEMBRANE (PHOBIUS); TRANSMEMBRANE (PHOBIUS); NON_CYTOPLASMIC_DOMAIN (PHOBIUS); NON_CYTOPLASMIC_DOMAIN (PHOBIUS); TRANSMEMBRANE (PHOBIUS); CYTOPLASMIC_DOMAIN (PHOBIUS); NON_CYTOPLASMIC_DOMAIN (PHOBIUS); CYTO…
Aqu2.1.21765_001	PREDICTED: hypothetical protein LOC100632299 [Amphimedon queenslandica]	344	1	0	1	0	-		no IPS match
Aqu2.1.21767_001	transient receptor potential cation channel subfamily a member 1 homolog	249	6	2.61409e-16	0.546667	4	C:GO:0016021; F:GO:0005216; P:GO:0006811; P:GO:0055085	-	CYTOPLASMIC_DOMAIN (PHOBIUS); TRANSMEMBRANE (PHOBIUS); NON_CYTOPLASMIC_DOMAIN (PHOBIUS); TMhelix (TMHMM)
Aqu2.1.21774_001	xanthine dehydrogenase-like	1389	20	0	0.682	7	F:GO:0050660; F:GO:0016614; F:GO:0005506; F:GO:0009055; F:GO:0051536; P:GO:0055114; P:GO:0006118	-	IPR000674 (SMART); IPR016208 (PIRSF); IPR008274 (G3DSA:3.30.365.GENE3D); IPR008274 (G3DSA:3.30.365.GENE3D); IPR001041 (PFAM); IPR008274 (PFAM); IPR000674 (PFAM); IPR002346 (PFAM); IPR008274 (G3DSA:3.30.365.GENE3D); IPR002888 (G3DSA:1.10.150.GENE3D); IPR002888 (PFAM); IPR012675 (G3DSA:3.10.20.GENE3D); IPR016169 (G3DSA:3.30.465.GENE3D); IPR000674 (G3DSA:3.90.1170.GENE3D); IPR008274 (G3DSA:3.30.365.…
Aqu2.1.21786_001	sushi domain-containing protein 2	442	20	2.62795e-99	0.443	1	F:GO:0005515		IPR002909 (PFAM); IPR005533 (PFAM); PTHR13802 (PANTHER); PTHR13802:SF1 (PANTHER); TRANSMEMBRANE (PHOBIUS); NON_CYTOPLASMIC_DOMAIN (PHOBIUS); CYTOPLASMIC_DOMAIN (PHOBIUS); IPR005533 (PROSITE_PROFILES); IPR001846 (PROSITE_PROFILES); IPR011047 (SUPERFAMILY); IPR014756 (SUPERFAMILY)
Aqu2.1.21824_001	---NA---	93	0			0	-		SignalP-noTM (SIGNALP_EUK)
Aqu2.1.21876_001	---NA---	28	0			0	-		no IPS match
Aqu2.1.21885_001	vacuolar protein sorting-associated protein 9a-like	436	20	4.0995e-49	0.588	0	-		Coil (COILS); IPR013995 (SMART); IPR003123 (PFAM); PTHR23101 (PANTHER); IPR003123 (PROSITE_PROFILES); SSF109993 (SUPERFAMILY)
Aqu2.1.21895_001	tyrosine-protein kinase stk-like	1151	20	0	0.823	5	F:GO:0004713; P:GO:0018108; F:GO:0005524; P:GO:0007165; F:GO:0005515	EC:2.7.10.0	IPR001245 (PRINTS); IPR001452 (PRINTS); IPR000980 (PRINTS); IPR000980 (SMART); IPR001452 (SMART); IPR000980 (PFAM); IPR000980 (G3DSA:3.30.505.GENE3D); G3DSA:2.30.30.40 (GENE3D); G3DSA:1.10.510.10 (GENE3D); IPR001452 (PFAM); G3DSA:3.30.200.20 (GENE3D); IPR011029 (G3DSA:1.10.533.GENE3D); IPR001245 (PFAM); IPR000488 (PFAM); PTHR24418 (PANTHER); PTHR24418:SF35 (PANTHER); IPR008266 (PROSITE_PATTERNS);…
Aqu2.1.21903_001	lrr and pyd domains-containing protein 3-like	997	20	0	0.46	2	F:GO:0016787; C:GO:0044424	-	PF05729 (PFAM); G3DSA:3.40.50.300 (GENE3D); G3DSA:3.40.50.300 (GENE3D); PTHR24106 (PANTHER); IPR007111 (PROSITE_PROFILES); IPR027417 (SUPERFAMILY)
Aqu2.1.21905_001	---NA---	102	0			0	-		TRANSMEMBRANE (PHOBIUS); NON_CYTOPLASMIC_DOMAIN (PHOBIUS); CYTOPLASMIC_DOMAIN (PHOBIUS); TMhelix (TMHMM)
Aqu2.1.21927_001	solute carrier family 15 member 4-like	715	13	1.00075e-45	0.509231	4	F:GO:0046873; P:GO:0055085; C:GO:0016020; P:GO:0030001	-	TRANSMEMBRANE (PHOBIUS); NON_CYTOPLASMIC_DOMAIN (PHOBIUS); TRANSMEMBRANE (PHOBIUS); TRANSMEMBRANE (PHOBIUS); TRANSMEMBRANE (PHOBIUS); CYTOPLASMIC_DOMAIN (PHOBIUS); CYTOPLASMIC_DOMAIN (PHOBIUS); CYTOPLASMIC_DOMAIN (PHOBIUS); TRANSMEMBRANE (PHOBIUS); TRANSMEMBRANE (PHOBIUS); TRANSMEMBRANE (PHOBIUS); NON_CYTOPLASMIC_DOMAIN (PHOBIUS); CYTOPLASMIC_DOMAIN (PHOBIUS); TRANSMEMBRANE (PHOBIUS); TRANSMEMBRA…
Aqu2.1.22047_001	ammonium transporter	390	20	0	0.4495	3	P:GO:0072488; C:GO:0016021; F:GO:0008519	-	G3DSA:1.10.3430.10 (GENE3D); IPR024041 (PFAM); IPR001905 (PANTHER); TRANSMEMBRANE (PHOBIUS); TRANSMEMBRANE (PHOBIUS); TRANSMEMBRANE (PHOBIUS); NON_CYTOPLASMIC_DOMAIN (PHOBIUS); TRANSMEMBRANE (PHOBIUS); NON_CYTOPLASMIC_DOMAIN (PHOBIUS); TRANSMEMBRANE (PHOBIUS); NON_CYTOPLASMIC_DOMAIN (PHOBIUS); NON_CYTOPLASMIC_DOMAIN (PHOBIUS); CYTOPLASMIC_DOMAIN (PHOBIUS); CYTOPLASMIC_DOMAIN (PHOBIUS); CYTOPLASMI…
Aqu2.1.22050_001	SUB1	112	20	1.43139e-74	0.7345	4	F:GO:0003713; F:GO:0003677; C:GO:0005667; P:GO:0045941	-	IPR003173 (PFAM); IPR009044 (G3DSA:2.30.31.GENE3D); PTHR13215 (PANTHER); IPR009044 (SUPERFAMILY)
Aqu2.1.22073_001	receptor-type tyrosine-protein phosphatase mu-like	484	6	2.18539e-12	0.501667	2	P:GO:0007165; F:GO:0005515		Coil (COILS); Coil (COILS); Coil (COILS); IPR000488 (PFAM); IPR011029 (G3DSA:1.10.533.GENE3D); IPR000488 (PROSITE_PROFILES); IPR011029 (SUPERFAMILY)
Aqu2.1.22096_001	deleted in malignant brain tumors 1	304	20	1.156e-123	0.6135	2	C:GO:0016020; F:GO:0005044		IPR001190 (PRINTS); IPR017448 (SMART); IPR001190 (PFAM); G3DSA:3.10.250.10 (GENE3D); PTHR19331:SF192 (PANTHER); PTHR19331 (PANTHER); IPR001190 (PROSITE_PATTERNS); SIGNAL_PEPTIDE_C_REGION (PHOBIUS); SIGNAL_PEPTIDE_H_REGION (PHOBIUS); NON_CYTOPLASMIC_DOMAIN (PHOBIUS); SIGNAL_PEPTIDE_N_REGION (PHOBIUS); SIGNAL_PEPTIDE (PHOBIUS); CYTOPLASMIC_DOMAIN (PHOBIUS); TRANSMEMBRANE (PHOBIUS); IPR001190 (PROSI…
Aqu2.1.22099_001	deleted in malignant brain tumors 1	492	20	0	0.5645	4	F:GO:0003677; P:GO:0015074; C:GO:0016020; F:GO:0005044	-	IPR001190 (PRINTS); IPR017448 (SMART); G3DSA:3.10.250.10 (GENE3D); IPR001190 (PFAM); PTHR19331:SF192 (PANTHER); PTHR19331 (PANTHER); IPR001190 (PROSITE_PATTERNS); IPR001190 (PROSITE_PATTERNS); IPR001190 (PROSITE_PROFILES); IPR001190 (PROSITE_PROFILES); IPR001190 (PROSITE_PROFILES); IPR001190 (PROSITE_PROFILES); IPR017448 (SUPERFAMILY); IPR017448 (SUPERFAMILY); IPR017448 (SUPERFAMILY); IPR017448 (…
Aqu2.1.22142_001	serine-protein kinase atm	781	20	0	0.663	37	F:GO:1901363; P:GO:0071044; F:GO:0047485; P:GO:0007094; P:GO:0030889; P:GO:0006975; P:GO:0007507; P:GO:0043525; P:GO:0007420; C:GO:0000781; P:GO:0006977; C:GO:0005654; P:GO:0048599; P:GO:0016572; P:GO:0090399; P:GO:0043517; P:GO:0071480; C:GO:0005737; P:GO:0031572; F:GO:0032403; F:GO:0097159; P:GO:0018105; C:GO:0005819; P:GO:0001756; P:GO:0046777; P:GO:0007131; F:GO:0016303; P:GO:0008630; F:GO:00…	EC:2.7.1.137	Coil (COILS); IPR000403 (SMART); G3DSA:3.30.1010.10 (GENE3D); IPR000403 (G3DSA:1.10.1070.GENE3D); IPR003152 (PFAM); IPR000403 (PFAM); PTHR11139 (PANTHER); IPR015519 (PTHR11139:PANTHER); IPR018936 (PROSITE_PATTERNS); IPR018936 (PROSITE_PATTERNS); IPR000403 (PROSITE_PROFILES); IPR014009 (PROSITE_PROFILES); IPR003152 (PROSITE_PROFILES); IPR011009 (SUPERFAMILY)
Aqu2.1.22161_001	hemicentin-1	2731	20	0	0.406	5	P:GO:0007160; P:GO:0007218; F:GO:0005515; C:GO:0016021; F:GO:0004930		IPR003598 (SMART); IPR003599 (SMART); IPR003886 (SMART); IPR003596 (SMART); IPR000203 (SMART); IPR000742 (SMART); IPR013783 (G3DSA:2.60.40.GENE3D); G3DSA:2.10.25.10 (GENE3D); IPR013783 (G3DSA:2.60.40.GENE3D); IPR013783 (G3DSA:2.60.40.GENE3D); IPR000832 (PFAM); IPR013783 (G3DSA:2.60.40.GENE3D); IPR000203 (PFAM); PF13927 (PFAM); IPR013783 (G3DSA:2.60.40.GENE3D); PF13895 (PFAM); IPR013783 (G3DSA:2.6…
Aqu2.1.22163_001	protein	230	20	4.70292e-165	0.7085	3	F:GO:0003964; P:GO:0006278; F:GO:0003723	EC:2.7.7.49	no IPS match
Aqu2.1.22199_001	PREDICTED: hypothetical protein LOC100639245 [Amphimedon queenslandica]	106	1	4.336e-05	0.49	0	-		NON_CYTOPLASMIC_DOMAIN (PHOBIUS); CYTOPLASMIC_DOMAIN (PHOBIUS); TRANSMEMBRANE (PHOBIUS); TRANSMEMBRANE (PHOBIUS); CYTOPLASMIC_DOMAIN (PHOBIUS); TMhelix (TMHMM); TMhelix (TMHMM)
Aqu2.1.22200_001	PREDICTED: hypothetical protein LOC100639245 [Amphimedon queenslandica]	212	1	8.98322e-39	0.58	0	-		CYTOPLASMIC_DOMAIN (PHOBIUS); TRANSMEMBRANE (PHOBIUS); NON_CYTOPLASMIC_DOMAIN (PHOBIUS); TRANSMEMBRANE (PHOBIUS); CYTOPLASMIC_DOMAIN (PHOBIUS); CYTOPLASMIC_DOMAIN (PHOBIUS); TRANSMEMBRANE (PHOBIUS); TRANSMEMBRANE (PHOBIUS); NON_CYTOPLASMIC_DOMAIN (PHOBIUS); TMhelix (TMHMM); TMhelix (TMHMM); TMhelix (TMHMM); TMhelix (TMHMM)
Aqu2.1.22203_001	PREDICTED: hypothetical protein LOC100639245 [Amphimedon queenslandica]	212	1	7.38755e-37	0.62	0	-		CYTOPLASMIC_DOMAIN (PHOBIUS); TRANSMEMBRANE (PHOBIUS); SIGNAL_PEPTIDE_H_REGION (PHOBIUS); NON_CYTOPLASMIC_DOMAIN (PHOBIUS); TRANSMEMBRANE (PHOBIUS); CYTOPLASMIC_DOMAIN (PHOBIUS); SIGNAL_PEPTIDE_N_REGION (PHOBIUS); SIGNAL_PEPTIDE_C_REGION (PHOBIUS); TRANSMEMBRANE (PHOBIUS); NON_CYTOPLASMIC_DOMAIN (PHOBIUS); SIGNAL_PEPTIDE (PHOBIUS); TMhelix (TMHMM); TMhelix (TMHMM); TMhelix (TMHMM); TMhelix (TMHMM)
Aqu2.1.22236_001	coronin-7	935	20	0	0.5875	2	F:GO:0005515; C:GO:0005794	-	IPR020472 (PRINTS); IPR001680 (SMART); IPR015048 (PFAM); IPR001680 (PFAM); IPR015943 (G3DSA:2.130.10.GENE3D); IPR015049 (PFAM); IPR015943 (G3DSA:2.130.10.GENE3D); IPR015505 (PANTHER); IPR027331 (PTHR10856:PANTHER); IPR019775 (PROSITE_PATTERNS); IPR001680 (PROSITE_PROFILES); IPR017986 (PROSITE_PROFILES); IPR001680 (PROSITE_PROFILES); IPR017986 (PROSITE_PROFILES); IPR017986 (SUPERFAMILY); IPR017986…
Aqu2.1.22242_001	coiled-coil domain-containing protein 138	364	20	1.87275e-16	0.473	0	-		Coil (COILS); Coil (COILS)
Aqu2.1.22279_001	zinc finger protein 862-like	781	20	1.28787e-157	0.543	1	F:GO:0003676		IPR012337 (SUPERFAMILY)
Aqu2.1.22281_001	PREDICTED: hypothetical protein LOC100632806 [Amphimedon queenslandica]	997	20	0	0.589	2	F:GO:0003677; F:GO:0005515	-	Coil (COILS); IPR015915 (G3DSA:2.120.10.GENE3D); PF13418 (PFAM); PTHR23244 (PANTHER); SSF117281 (SUPERFAMILY)
Aqu2.1.22282_001	tyrosine-protein kinase stk-like	708	20	0	0.764	3	F:GO:0004713; P:GO:0018108; F:GO:0005524	EC:2.7.10.0	Coil (COILS); Coil (COILS); IPR001245 (PRINTS); G3DSA:1.10.510.10 (GENE3D); IPR001245 (PFAM); G3DSA:3.30.200.20 (GENE3D); PTHR24418 (PANTHER); IPR008266 (PROSITE_PATTERNS); IPR000719 (PROSITE_PROFILES); IPR011009 (SUPERFAMILY)
Aqu2.1.22303_001	---NA---	29	0			0	-		no IPS match
Aqu2.1.22305_001	---NA---	37	0			0	-		no IPS match
Aqu2.1.22313_001	hypothetical protein LOTGIDRAFT_235026 [Lottia gigantea]	969	1	0.000230587	0.38	0	-		no IPS match
Aqu2.1.22322_001	upf0488 protein c8orf33 homolog	159	20	1.77431e-20	0.565	3	F:GO:0003674; P:GO:0008150; C:GO:0005575		Coil (COILS); PF15393 (PFAM); PTHR13602:SF0 (PANTHER); PTHR13602 (PANTHER)
Aqu2.1.22325_001	---NA---	70	0			0	-		SIGNAL_PEPTIDE_N_REGION (PHOBIUS); NON_CYTOPLASMIC_DOMAIN (PHOBIUS); SIGNAL_PEPTIDE (PHOBIUS); SIGNAL_PEPTIDE_C_REGION (PHOBIUS); SIGNAL_PEPTIDE_H_REGION (PHOBIUS); TMhelix (TMHMM)
Aqu2.1.22335_001	salivary secreted ribonuclease	113	20	2.54024e-76	0.5745	3	F:GO:0004521; P:GO:0009303; P:GO:0051252	-	IPR026770 (PANTHER); TRANSMEMBRANE (PHOBIUS); NON_CYTOPLASMIC_DOMAIN (PHOBIUS); CYTOPLASMIC_DOMAIN (PHOBIUS); TRANSMEMBRANE (PHOBIUS); CYTOPLASMIC_DOMAIN (PHOBIUS); TMhelix (TMHMM); TMhelix (TMHMM)
Aqu2.1.22403_001	poly -binding protein 3 isoform x3	379	20	7.12528e-83	0.636	3	C:GO:0044444; C:GO:0005634; F:GO:0003723	-	IPR004087 (SMART); IPR004088 (PFAM); G3DSA:3.30.1370.10 (GENE3D); G3DSA:3.30.1370.10 (GENE3D); PTHR10288:SF48 (PANTHER); PTHR10288 (PANTHER); IPR004088 (PROSITE_PROFILES); IPR004088 (PROSITE_PROFILES); IPR004088 (PROSITE_PROFILES); SSF54791 (SUPERFAMILY); SSF54791 (SUPERFAMILY); SSF54791 (SUPERFAMILY)
Aqu2.1.22405_001	tetratricopeptide repeat protein 7b-like	391	20	3.3235e-122	0.5985	2	F:GO:0016787; P:GO:0009117	-	CYTOPLASMIC_DOMAIN (PHOBIUS); NON_CYTOPLASMIC_DOMAIN (PHOBIUS); TRANSMEMBRANE (PHOBIUS); TMhelix (TMHMM)
Aqu2.1.22476_001	tyrosine-protein kinase src42a	517	20	0	0.7735	4	F:GO:0004713; P:GO:0018108; F:GO:0005524; F:GO:0005515	EC:2.7.10.0	IPR000980 (PRINTS); IPR001452 (PRINTS); IPR001245 (PRINTS); IPR020635 (SMART); IPR001452 (SMART); IPR000980 (SMART); G3DSA:2.30.30.40 (GENE3D); IPR001452 (PFAM); G3DSA:1.10.510.10 (GENE3D); G3DSA:3.30.200.20 (GENE3D); IPR001245 (PFAM); IPR000980 (PFAM); IPR000980 (G3DSA:3.30.505.GENE3D); PTHR24418 (PANTHER); IPR017441 (PROSITE_PATTERNS); IPR008266 (PROSITE_PATTERNS); IPR000719 (PROSITE_PROFILES);…
Aqu2.1.22494_001	midasin	1098	20	0	0.735	5	F:GO:0005524; F:GO:0016887; C:GO:0005622; F:GO:0008270; F:GO:0005515	EC:3.6.1.15	IPR003593 (SMART); IPR011704 (PFAM); IPR011042 (G3DSA:2.120.10.GENE3D); IPR000315 (PFAM); G3DSA:3.40.50.300 (GENE3D); IPR001258 (PFAM); PTHR22908:SF14 (PANTHER); PTHR22908 (PANTHER); IPR013017 (PROSITE_PROFILES); IPR013017 (PROSITE_PROFILES); IPR013017 (PROSITE_PROFILES); IPR013017 (PROSITE_PROFILES); IPR013017 (PROSITE_PROFILES); IPR000315 (PROSITE_PROFILES); IPR013017 (PROSITE_PROFILES); IPR027…
Aqu2.1.22496_001	PREDICTED: hypothetical protein LOC100633038 [Amphimedon queenslandica]	116	1	5.18827e-09	0.53	0	-		SIGNAL_PEPTIDE_C_REGION (PHOBIUS); SIGNAL_PEPTIDE_N_REGION (PHOBIUS); NON_CYTOPLASMIC_DOMAIN (PHOBIUS); SIGNAL_PEPTIDE (PHOBIUS); SIGNAL_PEPTIDE_H_REGION (PHOBIUS); SignalP-noTM (SIGNALP_EUK)
Aqu2.1.22556_001	PREDICTED: hypothetical protein LOC100631415 [Amphimedon queenslandica]	154	3	1.85291e-21	0.626667	0	-		no IPS match
Aqu2.1.22574_001	---NA---	61	0			0	-		no IPS match
Aqu2.1.22591_001	uncharacterized protein loc100378134 isoform x1	248	6	0	0.531667	0	-		IPR010736 (PFAM)
Aqu2.1.22647_001	PREDICTED: hypothetical protein LOC100634655 [Amphimedon queenslandica]	152	2	2.53852e-14	0.61	0	-		IPR003172 (PFAM); SIGNAL_PEPTIDE_N_REGION (PHOBIUS); SIGNAL_PEPTIDE_C_REGION (PHOBIUS); SIGNAL_PEPTIDE (PHOBIUS); SIGNAL_PEPTIDE_H_REGION (PHOBIUS); NON_CYTOPLASMIC_DOMAIN (PHOBIUS); SignalP-noTM (SIGNALP_EUK); SignalP-TM (SIGNALP_GRAM_POSITIVE); IPR014756 (SUPERFAMILY)
Aqu2.1.22648_001	PREDICTED: hypothetical protein LOC100634655 [Amphimedon queenslandica]	209	3	1.54607e-12	0.543333	4	F:GO:0005525; P:GO:0007264; F:GO:0000166; P:GO:0015031		IPR003172 (PFAM)
Aqu2.1.22662_001	aggregation factor core protein isoform c	550	20	5.75267e-175	0.4645	3	F:GO:0003824; P:GO:0007154; C:GO:0016021	-	IPR003644 (PFAM); TRANSMEMBRANE (PHOBIUS); CYTOPLASMIC_DOMAIN (PHOBIUS); TRANSMEMBRANE (PHOBIUS); NON_CYTOPLASMIC_DOMAIN (PHOBIUS); NON_CYTOPLASMIC_DOMAIN (PHOBIUS); SSF141072 (SUPERFAMILY); TMhelix (TMHMM)
Aqu2.1.22672_001	rna-binding protein nob1	74	20	6.26947e-40	0.772	0	-		PTHR12814 (PANTHER)
Aqu2.1.22699_001	islet cell autoantigen 1-like protein	552	20	0	0.6455	1	F:GO:0019904		IPR010504 (SMART); IPR027267 (G3DSA:1.20.1270.GENE3D); IPR010504 (PFAM); IPR024114 (PANTHER); PTHR10164:SF0 (PANTHER); IPR010504 (PROSITE_PROFILES); SSF103657 (SUPERFAMILY)
Aqu2.1.22704_001	ef-hand domain-containing family member c2-like	720	20	0	0.685	1	F:GO:0005509	-	IPR002048 (SMART); IPR006602 (SMART); IPR011992 (G3DSA:1.10.238.GENE3D); IPR010554 (PFAM); PTHR12086:SF6 (PANTHER); PTHR12086 (PANTHER); IPR002048 (PROSITE_PROFILES); IPR006602 (PROSITE_PROFILES); SSF47473 (SUPERFAMILY)
Aqu2.1.22710_001	60s ribosomal protein l35a	110	20	4.44392e-73	0.774	7	P:GO:0042273; F:GO:0003735; P:GO:0006364; C:GO:0022625; P:GO:0006412; C:GO:0005739; F:GO:0000049	-	IPR001780 (PFAM); IPR001780 (PANTHER); PTHR10902:SF0 (PANTHER); IPR001780 (PRODOM); IPR009000 (SUPERFAMILY)
Aqu2.1.22711_001	kidney mitochondrial carrier protein 1-like	302	20	0	0.7505	3	P:GO:0055085; C:GO:0016021; C:GO:0005739	-	IPR002067 (PRINTS); IPR018108 (PFAM); IPR023395 (G3DSA:1.50.40.GENE3D); PTHR24089:SF98 (PANTHER); PTHR24089 (PANTHER); IPR018108 (PROSITE_PROFILES); IPR023395 (SUPERFAMILY)
Aqu2.1.22822_001	rho guanine nucleotide exchange factor 17	1390	20	3.30665e-63	0.451	3	F:GO:0005089; P:GO:0035023; F:GO:0005515		Coil (COILS); IPR000219 (SMART); IPR000219 (G3DSA:1.20.900.GENE3D); IPR000219 (PFAM); IPR011993 (G3DSA:2.30.29.GENE3D); PTHR12877 (PANTHER); IPR000219 (PROSITE_PROFILES); IPR017986 (SUPERFAMILY); IPR000219 (SUPERFAMILY)
Aqu2.1.22926_001	---NA---	26	0			0	-		no IPS match
Aqu2.1.23006_001	protein fam188a	562	20	0	0.653	4	P:GO:0006915; C:GO:0005634; C:GO:0031965; F:GO:0005509		Coil (COILS); IPR025257 (PFAM); PTHR12473 (PANTHER)
Aqu2.1.23050_001	uncharacterized	303	20	5.75605e-40	0.4885	2	P:GO:0015074; F:GO:0003676		G3DSA:3.30.420.10 (GENE3D); IPR001584 (PFAM); PTHR10178 (PANTHER); PTHR10178:SF26 (PANTHER); CYTOPLASMIC_DOMAIN (PHOBIUS); NON_CYTOPLASMIC_DOMAIN (PHOBIUS); TRANSMEMBRANE (PHOBIUS); IPR001584 (PROSITE_PROFILES); IPR012337 (SUPERFAMILY); TMhelix (TMHMM)
Aqu2.1.23214_001	cytoplasmic dynein 2 light intermediate chain 1	366	20	0	0.6885	4	C:GO:0043231; C:GO:0043234; C:GO:0042995; C:GO:0044446	-	Coil (COILS); IPR022780 (PFAM); G3DSA:3.40.50.300 (GENE3D); PTHR13236 (PANTHER); IPR027417 (SUPERFAMILY)
Aqu2.1.23216_001	---NA---	171	0			0	-		Coil (COILS)
Aqu2.1.23226_001	tubulin-specific chaperone e isoform x1	819	20	0	0.6065	5	P:GO:0009987; P:GO:0071840; P:GO:0044707; F:GO:0005524; F:GO:0016887	-	IPR000938 (SMART); IPR000938 (G3DSA:2.30.30.GENE3D); IPR003439 (PFAM); G3DSA:3.40.50.300 (GENE3D); IPR000938 (PFAM); G3DSA:3.80.10.10 (GENE3D); IPR026082 (PANTHER); IPR000938 (PROSITE_PATTERNS); IPR003439 (PROSITE_PROFILES); IPR000938 (PROSITE_PROFILES); IPR027417 (SUPERFAMILY); IPR000938 (SUPERFAMILY); SSF52058 (SUPERFAMILY)
Aqu2.1.23251_001	hypothetical protein EAI_05389 [Harpegnathos saltator]	162	1	0.000206599	0.81	0	-		Coil (COILS); Coil (COILS); NON_CYTOPLASMIC_DOMAIN (PHOBIUS); TRANSMEMBRANE (PHOBIUS); CYTOPLASMIC_DOMAIN (PHOBIUS); TMhelix (TMHMM)
Aqu2.1.23313_001	pleckstrin domain-containing protein	468	20	0	0.5995	4	F:GO:0005089; F:GO:0005543; P:GO:0035023; P:GO:0043087	-	IPR000219 (SMART); IPR001849 (SMART); IPR000219 (PFAM); IPR000219 (G3DSA:1.20.900.GENE3D); IPR011993 (G3DSA:2.30.29.GENE3D); PTHR12673 (PANTHER); IPR001331 (PROSITE_PATTERNS); IPR001849 (PROSITE_PROFILES); IPR000219 (PROSITE_PROFILES); SSF50729 (SUPERFAMILY); IPR000219 (SUPERFAMILY)
Aqu2.1.23314_001	rab3 gtpase-activating protein non-catalytic subunit	1345	20	1.01902e-55	0.461	1	P:GO:0043087		PF14655 (PFAM); PF14656 (PFAM); IPR026059 (PANTHER)
Aqu2.1.23321_001	gamma-aminobutyric acid type b receptor subunit 2-like	855	20	7.51471e-29	0.4	3	C:GO:0016021; P:GO:0007186; F:GO:0004930		IPR017978 (PFAM); G3DSA:3.40.50.2300 (GENE3D); IPR001828 (PFAM); G3DSA:3.40.50.2300 (GENE3D); PTHR10519:SF4 (PANTHER); PTHR10519 (PANTHER); NON_CYTOPLASMIC_DOMAIN (PHOBIUS); TRANSMEMBRANE (PHOBIUS); NON_CYTOPLASMIC_DOMAIN (PHOBIUS); SIGNAL_PEPTIDE (PHOBIUS); NON_CYTOPLASMIC_DOMAIN (PHOBIUS); NON_CYTOPLASMIC_DOMAIN (PHOBIUS); CYTOPLASMIC_DOMAIN (PHOBIUS); TRANSMEMBRANE (PHOBIUS); SIGNAL_PEPTIDE_N_…
Aqu2.1.23322_001	gamma-aminobutyric acid type b receptor subunit 2	472	2	8.81423e-07	0.435	3	C:GO:0016021; P:GO:0007186; F:GO:0004930		IPR017978 (PFAM); TRANSMEMBRANE (PHOBIUS); CYTOPLASMIC_DOMAIN (PHOBIUS); TRANSMEMBRANE (PHOBIUS); NON_CYTOPLASMIC_DOMAIN (PHOBIUS); TRANSMEMBRANE (PHOBIUS); NON_CYTOPLASMIC_DOMAIN (PHOBIUS); CYTOPLASMIC_DOMAIN (PHOBIUS); CYTOPLASMIC_DOMAIN (PHOBIUS); TRANSMEMBRANE (PHOBIUS); TRANSMEMBRANE (PHOBIUS); TRANSMEMBRANE (PHOBIUS); NON_CYTOPLASMIC_DOMAIN (PHOBIUS); CYTOPLASMIC_DOMAIN (PHOBIUS); IPR028082…
Aqu2.1.23346_001	ankyrin repeat protein l93-like	556	20	0	0.6415	1	F:GO:0005515		IPR002110 (SMART); IPR020683 (G3DSA:1.25.40.GENE3D); IPR020683 (PFAM); PTHR24198 (PANTHER); IPR002110 (PROSITE_PROFILES); IPR020683 (PROSITE_PROFILES); IPR020683 (SUPERFAMILY)
Aqu2.1.23353_001	fibrinogen c domain-containing protein 1-like	296	20	2.75898e-106	0.731	0	-		IPR002181 (SMART); IPR014715 (G3DSA:4.10.530.GENE3D); IPR014715 (G3DSA:4.10.530.GENE3D); IPR014716 (G3DSA:3.90.215.GENE3D); IPR002181 (PFAM); PTHR19143 (PANTHER); IPR020837 (PROSITE_PATTERNS); IPR002181 (PROSITE_PROFILES); IPR002181 (SUPERFAMILY); IPR002181 (SUPERFAMILY)
Aqu2.1.23354_001	fibrinogen c domain-containing protein 1-like	244	20	9.40991e-131	0.727	0	-		IPR002181 (SMART); IPR014715 (G3DSA:4.10.530.GENE3D); IPR002181 (PFAM); IPR014716 (G3DSA:3.90.215.GENE3D); PTHR19143 (PANTHER); IPR020837 (PROSITE_PATTERNS); NON_CYTOPLASMIC_DOMAIN (PHOBIUS); SIGNAL_PEPTIDE_N_REGION (PHOBIUS); SIGNAL_PEPTIDE_H_REGION (PHOBIUS); SIGNAL_PEPTIDE (PHOBIUS); SIGNAL_PEPTIDE_C_REGION (PHOBIUS); IPR002181 (PROSITE_PROFILES); SignalP-TM (SIGNALP_GRAM_POSITIVE); SignalP-no…
Aqu2.1.23391_001	peptidylglycine alpha-hydroxylating monooxygenase	96	18	5.94205e-07	0.596111	3	F:GO:0005507; P:GO:0055114; F:GO:0016715		IPR000323 (G3DSA:2.60.120.GENE3D); IPR000323 (PFAM); IPR020611 (PROSITE_PATTERNS); SIGNAL_PEPTIDE_C_REGION (PHOBIUS); SIGNAL_PEPTIDE_N_REGION (PHOBIUS); SIGNAL_PEPTIDE_H_REGION (PHOBIUS); NON_CYTOPLASMIC_DOMAIN (PHOBIUS); SIGNAL_PEPTIDE (PHOBIUS); SignalP-TM (SIGNALP_GRAM_POSITIVE); SignalP-noTM (SIGNALP_GRAM_NEGATIVE); SignalP-noTM (SIGNALP_EUK); IPR008977 (SUPERFAMILY); TMhelix (TMHMM)
Aqu2.1.23395_001	chromatin assembly factor 1 subunit a	603	20	0	0.5795	4	C:GO:0043234; P:GO:0044763; P:GO:0006259; P:GO:0034645	-	Coil (COILS); PF11600 (PFAM); IPR022043 (PFAM); PTHR15272:SF0 (PANTHER); PTHR15272 (PANTHER)
Aqu2.1.23410_001	g2 mitotic-specific cyclin-b1-like	387	20	7.32881e-63	0.5635	6	P:GO:0000278; P:GO:0006996; P:GO:0022402; F:GO:0019901; P:GO:0000079; C:GO:0005634	-	IPR013763 (SMART); IPR014400 (PIRSF); IPR004367 (PFAM); IPR006671 (PFAM); IPR013763 (G3DSA:1.10.472.GENE3D); PTHR10177 (PANTHER); PTHR10177:SF64 (PANTHER); IPR006671 (PROSITE_PATTERNS); IPR013763 (SUPERFAMILY)
Aqu2.1.23426_001	---NA---	305	0			0	-		Coil (COILS)
Aqu2.1.23465_001	uncharacterized protein partial	191	20	3.45533e-66	0.5515	1	F:GO:0003676		G3DSA:3.30.420.10 (GENE3D); PTHR22955 (PANTHER); IPR012337 (SUPERFAMILY)
Aqu2.1.23567_001	beta-hexosaminidase subunit beta	405	20	0	0.766	5	P:GO:0005975; F:GO:0004563; P:GO:0001575; P:GO:0006027; P:GO:0006040	EC:3.2.1.52	IPR025705 (PRINTS); G3DSA:3.30.379.10 (GENE3D); PF14845 (PFAM); IPR015883 (PFAM); IPR013781 (G3DSA:3.20.20.GENE3D); PTHR22600:SF0 (PANTHER); PTHR22600 (PANTHER); SIGNAL_PEPTIDE_H_REGION (PHOBIUS); NON_CYTOPLASMIC_DOMAIN (PHOBIUS); SIGNAL_PEPTIDE_N_REGION (PHOBIUS); SIGNAL_PEPTIDE (PHOBIUS); SIGNAL_PEPTIDE_C_REGION (PHOBIUS); SignalP-noTM (SIGNALP_EUK); SignalP-TM (SIGNALP_GRAM_POSITIVE); SignalP-…
Aqu2.1.23573_001	---NA---	30	0			0	-		no IPS match
Aqu2.1.23575_001	serine threonine-protein kinase 12- partial	189	2	1.33718e-12	0.65	2	F:GO:0003676; F:GO:0003677		SIGNAL_PEPTIDE_H_REGION (PHOBIUS); NON_CYTOPLASMIC_DOMAIN (PHOBIUS); SIGNAL_PEPTIDE_N_REGION (PHOBIUS); SIGNAL_PEPTIDE (PHOBIUS); SIGNAL_PEPTIDE_C_REGION (PHOBIUS); SignalP-TM (SIGNALP_GRAM_POSITIVE); SignalP-noTM (SIGNALP_EUK); SignalP-noTM (SIGNALP_GRAM_NEGATIVE)
Aqu2.1.23587_001	---NA---	58	0			0	-		no IPS match
Aqu2.1.23634_001	eukaryotic translation initiation factor 2-alpha kinase 4-like	167	4	2.9639e-06	0.4925	6	F:GO:0005524; F:GO:0004672; F:GO:0000166; P:GO:0006468; F:GO:0016772; F:GO:0004674		no IPS match
Aqu2.1.23696_001	deleted in malignant brain tumors 1	451	20	1.14836e-116	0.519	3	F:GO:0003676; C:GO:0016020; F:GO:0005044	-	IPR001190 (PRINTS); IPR017448 (SMART); G3DSA:3.10.250.10 (GENE3D); IPR001190 (PFAM); PTHR19331:SF192 (PANTHER); PTHR19331 (PANTHER); IPR001190 (PROSITE_PATTERNS); TRANSMEMBRANE (PHOBIUS); SIGNAL_PEPTIDE_N_REGION (PHOBIUS); CYTOPLASMIC_DOMAIN (PHOBIUS); SIGNAL_PEPTIDE_H_REGION (PHOBIUS); SIGNAL_PEPTIDE (PHOBIUS); SIGNAL_PEPTIDE_C_REGION (PHOBIUS); NON_CYTOPLASMIC_DOMAIN (PHOBIUS); IPR001190 (PROSI…
Aqu2.1.23707_001	achain crystal structure of engineered northeast structural genomics consortium target	122	20	1.31071e-51	0.571	1	F:GO:0005515		IPR002110 (SMART); IPR020683 (PFAM); IPR020683 (G3DSA:1.25.40.GENE3D); IPR002110 (PROSITE_PROFILES); IPR020683 (PROSITE_PROFILES); IPR020683 (SUPERFAMILY)
Aqu2.1.23709_001	ankyrin repeat domain-containing protein 35	423	20	1.37323e-32	0.649	1	F:GO:0005515		IPR002110 (SMART); IPR020683 (G3DSA:1.25.40.GENE3D); IPR020683 (PFAM); PTHR24198 (PANTHER); TRANSMEMBRANE (PHOBIUS); CYTOPLASMIC_DOMAIN (PHOBIUS); NON_CYTOPLASMIC_DOMAIN (PHOBIUS); IPR002110 (PROSITE_PROFILES); IPR020683 (PROSITE_PROFILES); IPR020683 (SUPERFAMILY)
Aqu2.1.23718_001	wd repeat-containing protein 63- partial	349	20	5.52755e-72	0.6665	2	P:GO:0007165; F:GO:0005524		Coil (COILS)
Aqu2.1.23720_001	serine threonine-protein phosphatase 6 regulatory ankyrin repeat subunit b-like	316	20	8.59267e-123	0.562	1	F:GO:0005524		no IPS match
Aqu2.1.23722_001	PREDICTED: hypothetical protein LOC100634664 [Amphimedon queenslandica]	53	1	1.26777e-25	0.96	0	-		no IPS match
Aqu2.1.23723_001	---NA---	725	0			1	F:GO:0005515		IPR013783 (G3DSA:2.60.40.GENE3D); IPR013783 (G3DSA:2.60.40.GENE3D); CYTOPLASMIC_DOMAIN (PHOBIUS); NON_CYTOPLASMIC_DOMAIN (PHOBIUS); TRANSMEMBRANE (PHOBIUS); IPR003961 (PROSITE_PROFILES); IPR003961 (PROSITE_PROFILES); IPR003961 (PROSITE_PROFILES); IPR003961 (SUPERFAMILY); IPR003961 (SUPERFAMILY); TMhelix (TMHMM)
Aqu2.1.23725_001	receptor-type tyrosine-protein phosphatase f-like	611	20	1.23129e-10	0.4505	1	F:GO:0005515		IPR003961 (SMART); IPR013783 (G3DSA:2.60.40.GENE3D); IPR003961 (PFAM); IPR013783 (G3DSA:2.60.40.GENE3D); PTHR10489 (PANTHER); SIGNAL_PEPTIDE_N_REGION (PHOBIUS); SIGNAL_PEPTIDE_H_REGION (PHOBIUS); TRANSMEMBRANE (PHOBIUS); SIGNAL_PEPTIDE (PHOBIUS); SIGNAL_PEPTIDE_C_REGION (PHOBIUS); NON_CYTOPLASMIC_DOMAIN (PHOBIUS); CYTOPLASMIC_DOMAIN (PHOBIUS); IPR003961 (PROSITE_PROFILES); IPR003961 (PROSITE_PROF…
Aqu2.1.23799_001	transient receptor potential cation channel subfamily a member 1 homolog	812	4	4.03871e-44	0.5525	1	P:GO:0006810	-	IPR006626 (SMART); SIGNAL_PEPTIDE_N_REGION (PHOBIUS); TRANSMEMBRANE (PHOBIUS); SIGNAL_PEPTIDE (PHOBIUS); NON_CYTOPLASMIC_DOMAIN (PHOBIUS); SIGNAL_PEPTIDE_C_REGION (PHOBIUS); CYTOPLASMIC_DOMAIN (PHOBIUS); NON_CYTOPLASMIC_DOMAIN (PHOBIUS); TRANSMEMBRANE (PHOBIUS); SIGNAL_PEPTIDE_H_REGION (PHOBIUS); SignalP-noTM (SIGNALP_EUK); SignalP-TM (SIGNALP_GRAM_POSITIVE); SignalP-TM (SIGNALP_GRAM_NEGATIVE); T…
Aqu2.1.23804_001	predicted protein [Nematostella vectensis]	507	1	1.5905e-05	0.64	0	-		IPR006626 (SMART); SIGNAL_PEPTIDE_C_REGION (PHOBIUS); SIGNAL_PEPTIDE_N_REGION (PHOBIUS); SIGNAL_PEPTIDE (PHOBIUS); NON_CYTOPLASMIC_DOMAIN (PHOBIUS); SIGNAL_PEPTIDE_H_REGION (PHOBIUS); SignalP-noTM (SIGNALP_EUK); SignalP-noTM (SIGNALP_GRAM_NEGATIVE); SignalP-TM (SIGNALP_GRAM_POSITIVE); IPR011050 (SUPERFAMILY)
Aqu2.1.23810_001	wsc domain-containing protein 1-like	306	20	0	0.555	1	F:GO:0008146		G3DSA:3.40.50.300 (GENE3D); IPR000863 (PFAM); PTHR19297:SF12 (PANTHER); PTHR19297 (PANTHER); CYTOPLASMIC_DOMAIN (PHOBIUS); NON_CYTOPLASMIC_DOMAIN (PHOBIUS); TRANSMEMBRANE (PHOBIUS); IPR027417 (SUPERFAMILY); TMhelix (TMHMM)
Aqu2.1.23829_001	---NA---	190	0			0	-		no IPS match
Aqu2.1.23858_001	protein maats1	641	20	0	0.7255	0	-		Coil (COILS); Coil (COILS); Coil (COILS); Coil (COILS); PTHR22455 (PANTHER); PTHR22455:SF10 (PANTHER)
Aqu2.1.23866_001	structure-specific endonuclease subunit slx4	645	20	2.07062e-13	0.5245	5	F:GO:0005515; C:GO:0033557; F:GO:0017108; P:GO:0006281; P:GO:0006260		IPR011333 (G3DSA:3.30.710.GENE3D); IPR013069 (PFAM); IPR018574 (PFAM); PTHR21541 (PANTHER); PTHR21541:SF0 (PANTHER); IPR000210 (PROSITE_PROFILES); IPR011333 (SUPERFAMILY)
Aqu2.1.23869_001	cgmp-dependent 3 -cyclic phosphodiesterase isoform x3	870	20	0	0.6565	30	P:GO:0019933; F:GO:0004118; F:GO:0042803; P:GO:0071321; P:GO:0019934; P:GO:0043116; F:GO:0030552; P:GO:0036006; F:GO:0046872; C:GO:0005829; P:GO:0006198; P:GO:0007596; P:GO:0033159; F:GO:0005262; F:GO:0008144; P:GO:0046069; P:GO:0071560; P:GO:0009605; C:GO:0005886; F:GO:0030553; C:GO:0048471; P:GO:0000122; C:GO:0097458; F:GO:0030911; P:GO:0035690; P:GO:0030224; P:GO:0070588; C:GO:0005634; P:GO:00…	-	IPR023088 (PRINTS); IPR003018 (SMART); IPR003607 (SMART); IPR002073 (PFAM); IPR002073 (G3DSA:1.10.1300.GENE3D); IPR003018 (PFAM); G3DSA:3.30.450.40 (GENE3D); PTHR11347:SF18 (PANTHER); PTHR11347 (PANTHER); IPR023174 (PROSITE_PATTERNS); SSF55781 (SUPERFAMILY); SSF109604 (SUPERFAMILY)
Aqu2.1.23870_001	ring finger protein 150-like	396	20	8.56312e-29	0.4645	2	F:GO:0005515; F:GO:0008270		IPR001841 (SMART); IPR001841 (PFAM); IPR013083 (G3DSA:3.30.40.GENE3D); IPR003137 (PFAM); PTHR22765 (PANTHER); TRANSMEMBRANE (PHOBIUS); SIGNAL_PEPTIDE (PHOBIUS); NON_CYTOPLASMIC_DOMAIN (PHOBIUS); SIGNAL_PEPTIDE_N_REGION (PHOBIUS); SIGNAL_PEPTIDE_C_REGION (PHOBIUS); CYTOPLASMIC_DOMAIN (PHOBIUS); SIGNAL_PEPTIDE_H_REGION (PHOBIUS); IPR001841 (PROSITE_PROFILES); SignalP-noTM (SIGNALP_EUK); SignalP-TM …
Aqu2.1.23893_001	arf-gap with rho-gap ank repeat and ph domain-containing protein 1 isoform x2	2186	20	0	0.4995	7	F:GO:0008060; P:GO:0032312; F:GO:0008270; C:GO:0005622; F:GO:0005543; P:GO:0043547; F:GO:0005515	-	Coil (COILS); PR01217 (PRINTS); IPR001164 (SMART); IPR001660 (SMART); IPR000198 (SMART); IPR001849 (SMART); IPR011993 (G3DSA:2.30.29.GENE3D); IPR013761 (G3DSA:1.10.150.GENE3D); IPR001849 (PFAM); IPR011993 (G3DSA:2.30.29.GENE3D); IPR011993 (G3DSA:2.30.29.GENE3D); IPR001164 (PFAM); IPR011510 (PFAM); IPR000198 (G3DSA:1.10.555.GENE3D); IPR011993 (G3DSA:2.30.29.GENE3D); IPR000198 (PFAM); PTHR23180 (PA…
Aqu2.1.23939_001	PREDICTED: hypothetical protein LOC100636292, partial [Amphimedon queenslandica]	646	16	0	0.59625	2	F:GO:0016301; P:GO:0016310	-	CYTOPLASMIC_DOMAIN (PHOBIUS); NON_CYTOPLASMIC_DOMAIN (PHOBIUS); TRANSMEMBRANE (PHOBIUS); TMhelix (TMHMM)
Aqu2.1.23952_001	PREDICTED: hypothetical protein LOC100631648 [Amphimedon queenslandica]	851	20	0	0.581	2	F:GO:0016301; P:GO:0016310	-	TRANSMEMBRANE (PHOBIUS); SIGNAL_PEPTIDE_C_REGION (PHOBIUS); SIGNAL_PEPTIDE_N_REGION (PHOBIUS); SIGNAL_PEPTIDE (PHOBIUS); CYTOPLASMIC_DOMAIN (PHOBIUS); NON_CYTOPLASMIC_DOMAIN (PHOBIUS); SIGNAL_PEPTIDE_H_REGION (PHOBIUS); SignalP-noTM (SIGNALP_EUK)
Aqu2.1.23969_001	von willebrand factor a domain-containing protein 3a	265	20	4.57601e-30	0.5215	0	-		IPR002035 (SMART); IPR002035 (G3DSA:3.40.50.GENE3D); PF13768 (PFAM); PTHR10338:SF63 (PANTHER); PTHR10338 (PANTHER); IPR002035 (PROSITE_PROFILES); SSF53300 (SUPERFAMILY)
Aqu2.1.23970_001	PREDICTED: hypothetical protein LOC100639632, partial [Amphimedon queenslandica]	651	13	3.2441e-159	0.597692	2	F:GO:0016301; P:GO:0016310	-	no IPS match
Aqu2.1.23972_001	uncharacterized protein partial	102	20	1.90427e-26	0.625	4	F:GO:0003676; P:GO:0015074; P:GO:0008150; C:GO:0005575		no IPS match
Aqu2.1.23978_001	integrase core domain protein	178	20	1.85885e-76	0.5265	2	F:GO:0003676; F:GO:0008270	-	no IPS match
Aqu2.1.23993_001	uncharacterized protein loc100552244	207	19	1.40992e-13	0.496842	3	F:GO:0003723; P:GO:0006278; F:GO:0003964		CYTOPLASMIC_DOMAIN (PHOBIUS); NON_CYTOPLASMIC_DOMAIN (PHOBIUS); TRANSMEMBRANE (PHOBIUS); TMhelix (TMHMM)
Aqu2.1.24006_001	biogenesis of lysosome-related organelles complex 1 subunit 6-like	136	20	4.62644e-90	0.584	0	-		Coil (COILS); IPR028119 (PFAM); PTHR31328:SF1 (PANTHER); IPR017242 (PANTHER)
Aqu2.1.24008_001	wd repeat-containing protein 7 isoform 2	1359	20	0	0.512	1	F:GO:0005515		IPR001680 (SMART); IPR015943 (G3DSA:2.130.10.GENE3D); IPR001680 (PFAM); IPR015943 (G3DSA:2.130.10.GENE3D); PTHR22847 (PANTHER); IPR019775 (PROSITE_PATTERNS); IPR019775 (PROSITE_PATTERNS); IPR001680 (PROSITE_PROFILES); IPR017986 (PROSITE_PROFILES); IPR017986 (PROSITE_PROFILES); IPR017986 (SUPERFAMILY); IPR017986 (SUPERFAMILY); IPR017986 (SUPERFAMILY)
Aqu2.1.24025_001	udp-d-glucuronate 4-epimerase 4	597	20	0	0.491	3	P:GO:0044237; F:GO:0050662; F:GO:0003824	-	G3DSA:3.90.25.10 (GENE3D); IPR016040 (G3DSA:3.40.50.GENE3D); IPR001509 (PFAM); PTHR10366:SF42 (PANTHER); PTHR10366 (PANTHER); NON_CYTOPLASMIC_DOMAIN (PHOBIUS); SIGNAL_PEPTIDE_N_REGION (PHOBIUS); SIGNAL_PEPTIDE (PHOBIUS); SIGNAL_PEPTIDE_C_REGION (PHOBIUS); SIGNAL_PEPTIDE_H_REGION (PHOBIUS); SignalP-noTM (SIGNALP_EUK); SSF51735 (SUPERFAMILY)
Aqu2.1.24041_001	e3 ubiquitin-protein ligase topors	679	20	0	0.55	5	P:GO:0044260; F:GO:0008270; C:GO:0005815; P:GO:0044238; F:GO:0005515	-	Coil (COILS); IPR001841 (SMART); IPR001841 (PFAM); IPR013083 (G3DSA:3.30.40.GENE3D); PTHR12456 (PANTHER); PTHR12456:SF8 (PANTHER); IPR017907 (PROSITE_PATTERNS); IPR001841 (PROSITE_PROFILES); SSF57850 (SUPERFAMILY)
Aqu2.1.24060_001	uncharacterized protein partial	141	20	3.58508e-69	0.7	4	F:GO:0003723; P:GO:0006278; F:GO:0003964; P:GO:0015074	EC:2.7.7.49	PTHR24559 (PANTHER); PTHR24559:SF97 (PANTHER)
Aqu2.1.24070_001	hemicentin-1	1325	20	0	0.4085	1	F:GO:0005515		PR01832 (PRINTS); IPR003599 (SMART); IPR003961 (SMART); IPR003598 (SMART); IPR013098 (PFAM); IPR013783 (G3DSA:2.60.40.GENE3D); PF13895 (PFAM); IPR003961 (PFAM); PTHR10489 (PANTHER); SIGNAL_PEPTIDE_C_REGION (PHOBIUS); SIGNAL_PEPTIDE_N_REGION (PHOBIUS); NON_CYTOPLASMIC_DOMAIN (PHOBIUS); SIGNAL_PEPTIDE (PHOBIUS); SIGNAL_PEPTIDE_H_REGION (PHOBIUS); IPR007110 (PROSITE_PROFILES); IPR003961 (PROSITE_PRO…
Aqu2.1.24077_001	receptor-type tyrosine-protein phosphatase alpha-like	1260	20	0	0.7025	4	F:GO:0004725; P:GO:0035335; P:GO:0006570; F:GO:0005515	EC:3.1.3.48	IPR000242 (PRINTS); PR00014 (PRINTS); IPR003961 (SMART); IPR003599 (SMART); IPR000242 (SMART); IPR000242 (PFAM); IPR013783 (G3DSA:2.60.40.GENE3D); IPR013098 (PFAM); G3DSA:3.90.190.10 (GENE3D); IPR003961 (PFAM); PTHR19134 (PANTHER); NON_CYTOPLASMIC_DOMAIN (PHOBIUS); TRANSMEMBRANE (PHOBIUS); CYTOPLASMIC_DOMAIN (PHOBIUS); IPR000387 (PROSITE_PROFILES); IPR000242 (PROSITE_PROFILES); IPR007110 (PROSITE…
Aqu2.1.24119_001	amylo- 6- 4-alpha-glucanotransferase isoform 1	1476	20	0	0.5605	3	F:GO:0004135; F:GO:0004134; P:GO:0005980	-	Coil (COILS); PF14699 (PFAM); IPR010401 (PFAM); IPR013781 (G3DSA:3.20.20.GENE3D); PF14701 (PFAM); PF14702 (PFAM); IPR010401 (PANTHER); IPR017853 (SUPERFAMILY); IPR008928 (SUPERFAMILY)
Aqu2.1.24130_001	---NA---	437	0			0	-		Coil (COILS); Coil (COILS); Coil (COILS)
Aqu2.1.24153_001	protein	812	9	2.01045e-51	0.431111	0	-		IPR003368 (TIGRFAM); TRANSMEMBRANE (PHOBIUS); NON_CYTOPLASMIC_DOMAIN (PHOBIUS); TRANSMEMBRANE (PHOBIUS); NON_CYTOPLASMIC_DOMAIN (PHOBIUS); TRANSMEMBRANE (PHOBIUS); NON_CYTOPLASMIC_DOMAIN (PHOBIUS); TRANSMEMBRANE (PHOBIUS); TRANSMEMBRANE (PHOBIUS); CYTOPLASMIC_DOMAIN (PHOBIUS); NON_CYTOPLASMIC_DOMAIN (PHOBIUS); TRANSMEMBRANE (PHOBIUS); TRANSMEMBRANE (PHOBIUS); TRANSMEMBRANE (PHOBIUS); CYTOPLASMIC_…
Aqu2.1.24165_001	retrotransposon ty1-copia subclass	147	20	4.56736e-16	0.496	5	F:GO:0046872; F:GO:0003676; P:GO:0015074; F:GO:0008270; C:GO:0009536		PTHR11439 (PANTHER)
Aqu2.1.24170_001	calcium uptake protein mitochondrial-like	60	12	6.95938e-20	0.723333	3	F:GO:0008270; C:GO:0005622; F:GO:0005509	-	no IPS match
Aqu2.1.24181_001	gamma-aminobutyric acid type b receptor subunit 2-like	1128	20	1.03717e-18	0.45	3	C:GO:0044425; P:GO:0007165; C:GO:0005886	-	IPR001828 (PFAM); G3DSA:3.40.50.2300 (GENE3D); G3DSA:3.40.50.2300 (GENE3D); PTHR10519 (PANTHER); SIGNAL_PEPTIDE_N_REGION (PHOBIUS); NON_CYTOPLASMIC_DOMAIN (PHOBIUS); SIGNAL_PEPTIDE_H_REGION (PHOBIUS); SIGNAL_PEPTIDE (PHOBIUS); SIGNAL_PEPTIDE_C_REGION (PHOBIUS); SignalP-noTM (SIGNALP_EUK); IPR028082 (SUPERFAMILY)
Aqu2.1.24199_001	tyrosine-protein kinase src42a-like	497	20	3.06755e-45	0.58	5	P:GO:0030036; F:GO:0003779; F:GO:0000166; P:GO:0016310; F:GO:0016301	-	Coil (COILS); Coil (COILS); Coil (COILS); IPR001452 (SMART); G3DSA:2.30.30.40 (GENE3D); G3DSA:3.80.10.10 (GENE3D); IPR001452 (PFAM); PTHR24106 (PANTHER); IPR001452 (PROSITE_PROFILES); IPR001452 (SUPERFAMILY); SSF52047 (SUPERFAMILY)
Aqu2.1.24238_001	protein	185	19	1.95946e-29	0.529474	1	F:GO:0003676		no IPS match
Aqu2.1.24245_001	predicted protein [Nematostella vectensis]	196	1	6.68004e-05	0.54	0	-		no IPS match
Aqu2.1.24308_001	ephrin type-b receptor 1-like	2309	20	0	0.7045	3	F:GO:0004713; P:GO:0018108; F:GO:0005524	EC:2.7.10.0	IPR001245 (PRINTS); IPR000436 (SMART); IPR020635 (SMART); IPR001245 (PFAM); G3DSA:3.30.200.20 (GENE3D); IPR000436 (PFAM); G3DSA:1.10.510.10 (GENE3D); G3DSA:1.10.510.10 (GENE3D); G3DSA:1.10.510.10 (GENE3D); G3DSA:2.10.70.10 (GENE3D); G3DSA:2.10.70.10 (GENE3D); G3DSA:2.10.70.10 (GENE3D); G3DSA:2.10.70.10 (GENE3D); G3DSA:3.30.200.20 (GENE3D); G3DSA:3.30.200.20 (GENE3D); PTHR24418 (PANTHER); IPR01744…
Aqu2.1.24311_001	ephrin type-a receptor 4-like	836	20	0	0.6395	3	F:GO:0004713; P:GO:0018108; F:GO:0005524	EC:2.7.10.0	IPR001245 (PRINTS); IPR000436 (SMART); G3DSA:3.30.200.20 (GENE3D); G3DSA:1.10.510.10 (GENE3D); IPR001245 (PFAM); G3DSA:2.10.70.10 (GENE3D); PTHR24418 (PANTHER); IPR017441 (PROSITE_PATTERNS); IPR008266 (PROSITE_PATTERNS); TRANSMEMBRANE (PHOBIUS); CYTOPLASMIC_DOMAIN (PHOBIUS); NON_CYTOPLASMIC_DOMAIN (PHOBIUS); IPR000719 (PROSITE_PROFILES); IPR000436 (PROSITE_PROFILES); SignalP-noTM (SIGNALP_EUK); I…
Aqu2.1.24312_001	ephrin type-a receptor 4-like	811	20	0	0.643	3	F:GO:0004713; P:GO:0018108; F:GO:0005524	EC:2.7.10.0	IPR001245 (PRINTS); IPR000436 (SMART); IPR001245 (PFAM); G3DSA:3.30.200.20 (GENE3D); G3DSA:1.10.510.10 (GENE3D); G3DSA:2.10.70.10 (GENE3D); PTHR24418 (PANTHER); IPR017441 (PROSITE_PATTERNS); IPR008266 (PROSITE_PATTERNS); SIGNAL_PEPTIDE_N_REGION (PHOBIUS); NON_CYTOPLASMIC_DOMAIN (PHOBIUS); SIGNAL_PEPTIDE_H_REGION (PHOBIUS); SIGNAL_PEPTIDE (PHOBIUS); TRANSMEMBRANE (PHOBIUS); CYTOPLASMIC_DOMAIN (PHO…
Aqu2.1.24315_001	asparagine synthetase domain-containing protein 1	113	20	2.11697e-59	0.7325	4	F:GO:0004066; P:GO:0006529; P:GO:0006522; P:GO:0006531	EC:6.3.5.4	IPR001962 (PFAM); IPR014729 (G3DSA:3.40.50.GENE3D); PTHR11772 (PANTHER); SSF52402 (SUPERFAMILY)
Aqu2.1.24326_001	---NA---	21	0			0	-		no IPS match
Aqu2.1.24327_001	uncharacterized protein loc100374259	244	20	3.99797e-123	0.613	0	-		IPR025452 (PFAM)
Aqu2.1.24358_001	membrane-bound o-acyltransferase domain-containing protein 2-like	449	20	0	0.601	1	C:GO:0016021	-	IPR004299 (PFAM); PTHR13906 (PANTHER); PTHR13906:SF4 (PANTHER); TRANSMEMBRANE (PHOBIUS); NON_CYTOPLASMIC_DOMAIN (PHOBIUS); TRANSMEMBRANE (PHOBIUS); TRANSMEMBRANE (PHOBIUS); TRANSMEMBRANE (PHOBIUS); NON_CYTOPLASMIC_DOMAIN (PHOBIUS); NON_CYTOPLASMIC_DOMAIN (PHOBIUS); CYTOPLASMIC_DOMAIN (PHOBIUS); CYTOPLASMIC_DOMAIN (PHOBIUS); CYTOPLASMIC_DOMAIN (PHOBIUS); TRANSMEMBRANE (PHOBIUS); CYTOPLASMIC_DOMAIN…
Aqu2.1.24372_001	---NA---	74	0			0	-		Coil (COILS)
Aqu2.1.24377_001	PREDICTED: hypothetical protein LOC100631956 [Amphimedon queenslandica]	187	1	2.16842e-136	1	0	-		no IPS match
Aqu2.1.24388_001	inositol -trisphosphate receptor type 3-like	2115	20	0	0.4385	1	C:GO:0016020		G3DSA:2.80.10.50 (GENE3D); G3DSA:2.80.10.50 (GENE3D); IPR013662 (PFAM); CYTOPLASMIC_DOMAIN (PHOBIUS); TRANSMEMBRANE (PHOBIUS); TRANSMEMBRANE (PHOBIUS); NON_CYTOPLASMIC_DOMAIN (PHOBIUS); NON_CYTOPLASMIC_DOMAIN (PHOBIUS); IPR016093 (PROSITE_PROFILES); IPR016093 (PROSITE_PROFILES); IPR016093 (PROSITE_PROFILES); IPR016093 (SUPERFAMILY); TMhelix (TMHMM); TMhelix (TMHMM)
Aqu2.1.24425_001	uncharacterized protein loc582807	241	20	5.95176e-57	0.6835	0	-		no IPS match
Aqu2.1.24427_001	---NA---	150	0			0	-		no IPS match
Aqu2.1.24443_001	solute carrier family 15 member 4-like	478	20	1.07768e-59	0.4985	4	F:GO:0046873; P:GO:0055085; C:GO:0016020; P:GO:0030001	-	TRANSMEMBRANE (PHOBIUS); CYTOPLASMIC_DOMAIN (PHOBIUS); NON_CYTOPLASMIC_DOMAIN (PHOBIUS); TRANSMEMBRANE (PHOBIUS); CYTOPLASMIC_DOMAIN (PHOBIUS); TRANSMEMBRANE (PHOBIUS); CYTOPLASMIC_DOMAIN (PHOBIUS); CYTOPLASMIC_DOMAIN (PHOBIUS); NON_CYTOPLASMIC_DOMAIN (PHOBIUS); CYTOPLASMIC_DOMAIN (PHOBIUS); TRANSMEMBRANE (PHOBIUS); CYTOPLASMIC_DOMAIN (PHOBIUS); TRANSMEMBRANE (PHOBIUS); NON_CYTOPLASMIC_DOMAIN (PH…
Aqu2.1.24451_001	lrr and pyd domains-containing protein 3-like	457	7	9.47303e-85	0.527143	2	F:GO:0016787; C:GO:0044424	-	no IPS match
Aqu2.1.24453_001	rna pseudouridylate synthase domain-containing protein 2-like	425	20	0	0.633	5	F:GO:0009982; P:GO:0045089; F:GO:0003723; P:GO:0001522; P:GO:0050829	EC:5.4.99.12	IPR006145 (PFAM); IPR006225 (TIGRFAM); PTHR10436:SF40 (PANTHER); PTHR10436 (PANTHER); IPR006224 (PROSITE_PATTERNS); IPR002942 (PROSITE_PROFILES); IPR020103 (SUPERFAMILY)
Aqu2.1.24470_001	nitrate transporter	521	14	2.45599e-26	0.547857	4	P:GO:0030001; C:GO:0016020; F:GO:0046873; P:GO:0055085	-	G3DSA:1.20.1250.20 (GENE3D); CYTOPLASMIC_DOMAIN (PHOBIUS); TRANSMEMBRANE (PHOBIUS); NON_CYTOPLASMIC_DOMAIN (PHOBIUS); CYTOPLASMIC_DOMAIN (PHOBIUS); TRANSMEMBRANE (PHOBIUS); TRANSMEMBRANE (PHOBIUS); CYTOPLASMIC_DOMAIN (PHOBIUS); CYTOPLASMIC_DOMAIN (PHOBIUS); TRANSMEMBRANE (PHOBIUS); NON_CYTOPLASMIC_DOMAIN (PHOBIUS); SIGNAL_PEPTIDE_N_REGION (PHOBIUS); TRANSMEMBRANE (PHOBIUS); SIGNAL_PEPTIDE_H_REGIO…
Aqu2.1.24471_001	zinc transporter zip9-b-like	756	20	6.06211e-57	0.54	4	P:GO:0030001; C:GO:0016020; F:GO:0046873; P:GO:0055085	-	Coil (COILS); Coil (COILS); Coil (COILS); NON_CYTOPLASMIC_DOMAIN (PHOBIUS); TRANSMEMBRANE (PHOBIUS); NON_CYTOPLASMIC_DOMAIN (PHOBIUS); CYTOPLASMIC_DOMAIN (PHOBIUS); CYTOPLASMIC_DOMAIN (PHOBIUS); NON_CYTOPLASMIC_DOMAIN (PHOBIUS); CYTOPLASMIC_DOMAIN (PHOBIUS); TRANSMEMBRANE (PHOBIUS); TRANSMEMBRANE (PHOBIUS); TRANSMEMBRANE (PHOBIUS); TRANSMEMBRANE (PHOBIUS); IPR016196 (SUPERFAMILY); TMhelix (TMHMM)…
Aqu2.1.24487_001	hypoxia-inducible factor 1-alpha inhibitor	329	20	0	0.7435	23	F:GO:0048037; P:GO:0045746; P:GO:2001214; F:GO:0008270; F:GO:0071532; F:GO:0036140; F:GO:0031406; P:GO:0061428; C:GO:0005829; P:GO:0042264; F:GO:0005506; P:GO:0042265; F:GO:0051059; F:GO:0036139; F:GO:0019826; P:GO:0055114; P:GO:0045663; P:GO:0036138; C:GO:0048471; F:GO:0042803; C:GO:0005634; F:GO:0005112; C:GO:0005667	-	IPR003347 (SMART); G3DSA:2.60.120.650 (GENE3D); IPR027452 (G3DSA:1.10.287.GENE3D); PF13621 (PFAM); PTHR12461 (PANTHER); IPR003347 (PROSITE_PROFILES); SSF51197 (SUPERFAMILY)
Aqu2.1.24493_001	---NA---	654	0			0	-		Coil (COILS); Coil (COILS); Coil (COILS)
Aqu2.1.24513_001	protein	286	20	0	0.6245	2	P:GO:0006810; C:GO:0016021	-	IPR018108 (PFAM); IPR023395 (G3DSA:1.50.40.GENE3D); PTHR24089:SF108 (PANTHER); PTHR24089 (PANTHER); NON_CYTOPLASMIC_DOMAIN (PHOBIUS); CYTOPLASMIC_DOMAIN (PHOBIUS); CYTOPLASMIC_DOMAIN (PHOBIUS); TRANSMEMBRANE (PHOBIUS); TRANSMEMBRANE (PHOBIUS); IPR018108 (PROSITE_PROFILES); IPR023395 (SUPERFAMILY); TMhelix (TMHMM); TMhelix (TMHMM); TMhelix (TMHMM)
Aqu2.1.24516_001	wd repeat-containing protein 61	329	20	0	0.762	12	C:GO:0016593; P:GO:0045638; F:GO:0005515; P:GO:2001162; P:GO:0032968; C:GO:0055087; F:GO:0016740; C:GO:0005730; P:GO:0051571; P:GO:0045944; P:GO:0080182; C:GO:0035327	-	IPR020472 (PRINTS); IPR001680 (SMART); IPR015943 (G3DSA:2.130.10.GENE3D); IPR001680 (PFAM); PTHR22841:SF6 (PANTHER); PTHR22841 (PANTHER); IPR019775 (PROSITE_PATTERNS); IPR019775 (PROSITE_PATTERNS); SIGNAL_PEPTIDE_H_REGION (PHOBIUS); SIGNAL_PEPTIDE_N_REGION (PHOBIUS); SIGNAL_PEPTIDE_C_REGION (PHOBIUS); SIGNAL_PEPTIDE (PHOBIUS); NON_CYTOPLASMIC_DOMAIN (PHOBIUS); IPR001680 (PROSITE_PROFILES); IPR001…
Aqu2.1.24534_001	deleted in malignant brain tumors 1	484	20	1.37502e-70	0.495	5	C:GO:0016020; F:GO:0005044; F:GO:0004222; P:GO:0006508; F:GO:0008270		IPR001190 (PRINTS); IPR001506 (PRINTS); IPR006026 (SMART); IPR017448 (SMART); IPR001190 (PFAM); IPR001506 (PFAM); G3DSA:3.10.250.10 (GENE3D); IPR024079 (G3DSA:3.40.390.GENE3D); PTHR19331 (PANTHER); IPR001190 (PROSITE_PATTERNS); SIGNAL_PEPTIDE_N_REGION (PHOBIUS); SIGNAL_PEPTIDE (PHOBIUS); SIGNAL_PEPTIDE_H_REGION (PHOBIUS); NON_CYTOPLASMIC_DOMAIN (PHOBIUS); SIGNAL_PEPTIDE_C_REGION (PHOBIUS); IPR001…
Aqu2.1.24543_001	PREDICTED: hypothetical protein LOC100635700 [Amphimedon queenslandica]	390	1	5.09956e-123	1	0	-		TRANSMEMBRANE (PHOBIUS); NON_CYTOPLASMIC_DOMAIN (PHOBIUS); TRANSMEMBRANE (PHOBIUS); NON_CYTOPLASMIC_DOMAIN (PHOBIUS); TRANSMEMBRANE (PHOBIUS); NON_CYTOPLASMIC_DOMAIN (PHOBIUS); TRANSMEMBRANE (PHOBIUS); TRANSMEMBRANE (PHOBIUS); TRANSMEMBRANE (PHOBIUS); CYTOPLASMIC_DOMAIN (PHOBIUS); CYTOPLASMIC_DOMAIN (PHOBIUS); TRANSMEMBRANE (PHOBIUS); NON_CYTOPLASMIC_DOMAIN (PHOBIUS); CYTOPLASMIC_DOMAIN (PHOBIUS)…
Aqu2.1.24545_001	adenylate cyclase type 2	1048	20	0	0.5625	4	C:GO:0016020; F:GO:0016849; P:GO:0035556; P:GO:0009190	-	IPR001054 (SMART); IPR001054 (G3DSA:3.30.70.GENE3D); IPR001054 (PFAM); IPR001054 (G3DSA:3.30.70.GENE3D); PTHR11920 (PANTHER); PTHR11920:SF23 (PANTHER); IPR018297 (PROSITE_PATTERNS); TRANSMEMBRANE (PHOBIUS); TRANSMEMBRANE (PHOBIUS); TRANSMEMBRANE (PHOBIUS); TRANSMEMBRANE (PHOBIUS); NON_CYTOPLASMIC_DOMAIN (PHOBIUS); CYTOPLASMIC_DOMAIN (PHOBIUS); CYTOPLASMIC_DOMAIN (PHOBIUS); CYTOPLASMIC_DOMAIN (PHO…
Aqu2.1.24554_001	protein arv1	231	20	3.1154e-14	0.546	6	P:GO:0009405; P:GO:0006810; P:GO:0006629; C:GO:0043231; C:GO:0044444; C:GO:0016020	-	IPR007290 (PFAM); IPR007290 (PANTHER); CYTOPLASMIC_DOMAIN (PHOBIUS); TRANSMEMBRANE (PHOBIUS); NON_CYTOPLASMIC_DOMAIN (PHOBIUS); CYTOPLASMIC_DOMAIN (PHOBIUS); TRANSMEMBRANE (PHOBIUS); CYTOPLASMIC_DOMAIN (PHOBIUS); NON_CYTOPLASMIC_DOMAIN (PHOBIUS); TRANSMEMBRANE (PHOBIUS); NON_CYTOPLASMIC_DOMAIN (PHOBIUS); TRANSMEMBRANE (PHOBIUS); TRANSMEMBRANE (PHOBIUS); TMhelix (TMHMM); TMhelix (TMHMM); TMhelix (…
Aqu2.1.24601_001	golgin subfamily a member 2-like	575	20	1.785e-138	0.519	1	C:GO:0005794	-	Coil (COILS); Coil (COILS); Coil (COILS); Coil (COILS); Coil (COILS); Coil (COILS); Coil (COILS); Coil (COILS); Coil (COILS); Coil (COILS); G3DSA:1.20.5.170 (GENE3D); PF15070 (PFAM); PTHR10881:SF4 (PANTHER); IPR024858 (PANTHER)
Aqu2.1.24613_001	intelectin 2	428	20	1.51622e-62	0.576	2	F:GO:0016787; P:GO:0009117	-	IPR014716 (G3DSA:3.90.215.GENE3D); NON_CYTOPLASMIC_DOMAIN (PHOBIUS); CYTOPLASMIC_DOMAIN (PHOBIUS); TRANSMEMBRANE (PHOBIUS); IPR002181 (SUPERFAMILY); TMhelix (TMHMM)
Aqu2.1.24617_001	protein phosphatase 1 regulatory subunit 11-like	101	20	1.6777e-67	0.645	0	-		IPR011107 (PFAM); IPR011107 (PANTHER)
Aqu2.1.24632_001	rna-directed dna polymerase from mobile element jockey-like	178	20	4.49353e-19	0.5355	19	F:GO:0005525; F:GO:0003924; P:GO:0006184; F:GO:0000166; F:GO:0004674; P:GO:0006397; P:GO:0016310; F:GO:0004540; F:GO:0004672; P:GO:0006468; F:GO:0005524; F:GO:0016301; F:GO:0016772; F:GO:0003723; P:GO:0006278; F:GO:0003964; F:GO:0003676; C:GO:0016021; C:GO:0016020		CYTOPLASMIC_DOMAIN (PHOBIUS); NON_CYTOPLASMIC_DOMAIN (PHOBIUS); TRANSMEMBRANE (PHOBIUS); TRANSMEMBRANE (PHOBIUS); CYTOPLASMIC_DOMAIN (PHOBIUS); NON_CYTOPLASMIC_DOMAIN (PHOBIUS); TRANSMEMBRANE (PHOBIUS); TMhelix (TMHMM)
Aqu2.1.24636_001	receptor-type tyrosine-protein phosphatase f-like	802	18	0	0.603333	1	F:GO:0005515		IPR003961 (SMART); IPR003961 (PFAM); IPR013783 (G3DSA:2.60.40.GENE3D); SIGNAL_PEPTIDE_N_REGION (PHOBIUS); SIGNAL_PEPTIDE_H_REGION (PHOBIUS); NON_CYTOPLASMIC_DOMAIN (PHOBIUS); SIGNAL_PEPTIDE (PHOBIUS); SIGNAL_PEPTIDE_C_REGION (PHOBIUS); IPR003961 (PROSITE_PROFILES); SignalP-noTM (SIGNALP_EUK); IPR003961 (SUPERFAMILY)
Aqu2.1.24637_001	fibrinogen c domain-containing protein 1-like	102	20	7.11174e-47	0.717	0	-		IPR002181 (SMART); IPR002181 (PFAM); IPR014715 (G3DSA:4.10.530.GENE3D); PTHR19143 (PANTHER); IPR020837 (PROSITE_PATTERNS); IPR002181 (PROSITE_PROFILES); IPR002181 (SUPERFAMILY)
Aqu2.1.24655_001	dna damage-binding protein 2	424	20	3.23242e-84	0.5695	2	P:GO:0009987; F:GO:0005515	-	IPR001680 (SMART); IPR015943 (G3DSA:2.130.10.GENE3D); IPR001680 (PFAM); PTHR15169 (PANTHER); PTHR15169:SF0 (PANTHER); IPR019775 (PROSITE_PATTERNS); IPR001680 (PROSITE_PROFILES); IPR017986 (PROSITE_PROFILES); IPR017986 (SUPERFAMILY)
Aqu2.1.24658_001	PREDICTED: hypothetical protein LOC100639632, partial [Amphimedon queenslandica]	525	19	1.71975e-137	0.550526	2	F:GO:0016301; P:GO:0016310	-	SIGNAL_PEPTIDE_C_REGION (PHOBIUS); SIGNAL_PEPTIDE_N_REGION (PHOBIUS); NON_CYTOPLASMIC_DOMAIN (PHOBIUS); TRANSMEMBRANE (PHOBIUS); SIGNAL_PEPTIDE_H_REGION (PHOBIUS); SIGNAL_PEPTIDE (PHOBIUS); CYTOPLASMIC_DOMAIN (PHOBIUS); SignalP-noTM (SIGNALP_EUK); TMhelix (TMHMM)
Aqu2.1.24660_001	multidrug resistance-associated protein 4	1238	20	0	0.592	4	F:GO:0005524; P:GO:0055085; F:GO:0042626; C:GO:0016021	-	IPR003593 (SMART); G3DSA:3.40.50.300 (GENE3D); IPR003439 (PFAM); G3DSA:1.20.1560.10 (GENE3D); IPR001140 (PFAM); G3DSA:3.40.50.300 (GENE3D); PTHR24223 (PANTHER); IPR017871 (PROSITE_PATTERNS); CYTOPLASMIC_DOMAIN (PHOBIUS); TRANSMEMBRANE (PHOBIUS); CYTOPLASMIC_DOMAIN (PHOBIUS); CYTOPLASMIC_DOMAIN (PHOBIUS); CYTOPLASMIC_DOMAIN (PHOBIUS); TRANSMEMBRANE (PHOBIUS); TRANSMEMBRANE (PHOBIUS); CYTOPLASMIC_D…
Aqu2.1.24681_001	gag-pol polyprotein	82	20	3.15606e-31	0.7675	5	F:GO:0003964; P:GO:0006278; F:GO:0003723; F:GO:0004190; P:GO:0006508	EC:2.7.7.49; EC:3.4.23.0	G3DSA:3.10.10.10 (GENE3D); IPR000477 (PFAM); PTHR10178 (PANTHER); PTHR10178:SF228 (PANTHER); SSF56672 (SUPERFAMILY)
Aqu2.1.24718_001	wd repeat-containing protein 52	191	18	3.10415e-17	0.656111	0	-		no IPS match
Aqu2.1.24734_001	hypothetical protein A306_06070, partial [Columba livia]	53	1	0.000569627	0.66	0	-		NON_CYTOPLASMIC_DOMAIN (PHOBIUS); CYTOPLASMIC_DOMAIN (PHOBIUS); TRANSMEMBRANE (PHOBIUS); TMhelix (TMHMM)
Aqu2.1.24735_001	uncharacterized protein loc102723774	172	18	1.3833e-25	0.558889	0	-		NON_CYTOPLASMIC_DOMAIN (PHOBIUS); NON_CYTOPLASMIC_DOMAIN (PHOBIUS); SIGNAL_PEPTIDE_H_REGION (PHOBIUS); TRANSMEMBRANE (PHOBIUS); TRANSMEMBRANE (PHOBIUS); SIGNAL_PEPTIDE_N_REGION (PHOBIUS); CYTOPLASMIC_DOMAIN (PHOBIUS); TRANSMEMBRANE (PHOBIUS); SIGNAL_PEPTIDE (PHOBIUS); SIGNAL_PEPTIDE_C_REGION (PHOBIUS); NON_CYTOPLASMIC_DOMAIN (PHOBIUS); CYTOPLASMIC_DOMAIN (PHOBIUS); TRANSMEMBRANE (PHOBIUS); TMheli…
Aqu2.1.24739_001	ankyrin repeat protein	926	20	5.172e-108	0.5585	3	F:GO:0005524; F:GO:0005515; P:GO:0007165	-	IPR002110 (SMART); IPR020683 (G3DSA:1.25.40.GENE3D); IPR020683 (PFAM); G3DSA:3.40.50.300 (GENE3D); IPR011029 (G3DSA:1.10.533.GENE3D); PTHR24198 (PANTHER); IPR020683 (PROSITE_PROFILES); IPR002110 (PROSITE_PROFILES); IPR000488 (PROSITE_PROFILES); IPR020683 (SUPERFAMILY); IPR027417 (SUPERFAMILY); IPR011029 (SUPERFAMILY)
Aqu2.1.24740_001	ankyrin-1- partial	142	20	3.2007e-25	0.5885	1	F:GO:0005515		IPR002110 (SMART); IPR020683 (G3DSA:1.25.40.GENE3D); IPR020683 (PFAM); PTHR24193 (PANTHER); IPR002110 (PROSITE_PROFILES); IPR020683 (PROSITE_PROFILES); IPR020683 (SUPERFAMILY)
Aqu2.1.24781_001	85 88 kda calcium-independent phospholipase a2 isoform x2	705	20	1.35559e-65	0.5195	2	F:GO:0005515; P:GO:0006629		IPR002110 (SMART); IPR020683 (G3DSA:1.25.40.GENE3D); IPR020683 (PFAM); IPR002641 (PFAM); G3DSA:3.40.1090.10 (GENE3D); PTHR24139:SF0 (PANTHER); PTHR24139 (PANTHER); IPR002110 (PROSITE_PROFILES); IPR020683 (PROSITE_PROFILES); IPR016035 (SUPERFAMILY); IPR020683 (SUPERFAMILY)
Aqu2.1.24816_001	tyrosine-protein kinase btk29a-like	827	20	0	0.771	4	F:GO:0004713; P:GO:0018108; F:GO:0005524; F:GO:0005515	EC:2.7.10.0	Coil (COILS); Coil (COILS); IPR001245 (PRINTS); IPR000980 (PRINTS); IPR000980 (SMART); IPR000719 (PFAM); G3DSA:3.30.200.20 (GENE3D); IPR000980 (PFAM); G3DSA:1.10.510.10 (GENE3D); IPR001245 (PFAM); IPR000980 (G3DSA:3.30.505.GENE3D); PTHR24418:SF65 (PANTHER); PTHR24418 (PANTHER); IPR017441 (PROSITE_PATTERNS); IPR008266 (PROSITE_PATTERNS); IPR000980 (PROSITE_PROFILES); IPR000719 (PROSITE_PROFILES); …
Aqu2.1.24817_001	tyrosine-protein kinase btk29a-like	1818	20	0	0.7385	15	F:GO:0050839; P:GO:0050775; P:GO:0007185; F:GO:0005102; F:GO:0005001; P:GO:0007157; F:GO:0004713; P:GO:0097105; P:GO:0018108; P:GO:0006470; P:GO:0021772; C:GO:0005887; F:GO:0005524; P:GO:0006570; F:GO:0004843	EC:2.7.10.0	Coil (COILS); Coil (COILS); Coil (COILS); IPR001245 (PRINTS); IPR000980 (PRINTS); IPR000242 (PRINTS); IPR003595 (SMART); IPR000980 (SMART); IPR020635 (SMART); IPR000242 (SMART); IPR000719 (PFAM); G3DSA:3.90.190.10 (GENE3D); G3DSA:3.90.190.10 (GENE3D); G3DSA:1.10.510.10 (GENE3D); IPR000242 (PFAM); G3DSA:1.10.510.10 (GENE3D); G3DSA:3.30.2230.10 (GENE3D); G3DSA:3.30.200.20 (GENE3D); IPR000980 (G3DSA…
Aqu2.1.24852_001	---NA---	166	0			0	-		no IPS match
Aqu2.1.24900_001	PREDICTED: hypothetical protein LOC100636501 [Amphimedon queenslandica]	94	1	6.48678e-58	1	0	-		no IPS match
Aqu2.1.24903_001	---NA---	175	0			0	-		NON_CYTOPLASMIC_DOMAIN (PHOBIUS); TRANSMEMBRANE (PHOBIUS); CYTOPLASMIC_DOMAIN (PHOBIUS); TMhelix (TMHMM)
Aqu2.1.24920_001	adp-ribosylation factor-like protein 13b isoform x1	391	20	1.52844e-169	0.596	4	F:GO:0005525; C:GO:0005622; P:GO:0007264; P:GO:0006886	-	Coil (COILS); IPR006689 (PRINTS); IPR024156 (SMART); IPR006687 (SMART); G3DSA:3.40.50.300 (GENE3D); IPR006689 (PFAM); IPR005225 (TIGRFAM); PTHR11711 (PANTHER); PTHR11711:SF11 (PANTHER); IPR024156 (PROSITE_PROFILES); IPR027417 (SUPERFAMILY)
Aqu2.1.24921_001	ras-associated and pleckstrin homology domains-containing protein 1	1335	20	0	0.543	1	P:GO:0007165		IPR000159 (SMART); IPR001849 (SMART); IPR001849 (PFAM); IPR011993 (G3DSA:2.30.29.GENE3D); G3DSA:3.10.20.90 (GENE3D); IPR000159 (PFAM); G3DSA:3.40.50.300 (GENE3D); PTHR11243 (PANTHER); IPR000159 (PROSITE_PROFILES); IPR001849 (PROSITE_PROFILES); SSF54236 (SUPERFAMILY); SSF50729 (SUPERFAMILY)
Aqu2.1.24922_001	PREDICTED: hypothetical protein LOC100635236 [Amphimedon queenslandica]	497	1	0	1	0	-		Coil (COILS)
Aqu2.1.24923_001	cation efflux family protein	481	20	0	0.6395	4	C:GO:0016021; F:GO:0008324; P:GO:0006812; P:GO:0055085	-	IPR002524 (TIGRFAM); IPR002524 (PFAM); IPR027469 (G3DSA:1.20.1510.GENE3D); IPR027470 (G3DSA:3.30.70.GENE3D); IPR002524 (PANTHER); PTHR11562:SF10 (PANTHER); TRANSMEMBRANE (PHOBIUS); CYTOPLASMIC_DOMAIN (PHOBIUS); CYTOPLASMIC_DOMAIN (PHOBIUS); NON_CYTOPLASMIC_DOMAIN (PHOBIUS); TRANSMEMBRANE (PHOBIUS); TRANSMEMBRANE (PHOBIUS); CYTOPLASMIC_DOMAIN (PHOBIUS); NON_CYTOPLASMIC_DOMAIN (PHOBIUS); TRANSMEMBR…
Aqu2.1.24924_001	kelch domain-containing protein 4-like	457	20	0	0.651	3	F:GO:0016301; P:GO:0016310; F:GO:0005515	-	IPR015915 (G3DSA:2.120.10.GENE3D); PF13415 (PFAM); IPR006652 (PFAM); PTHR23244 (PANTHER); SSF117281 (SUPERFAMILY); SSF117281 (SUPERFAMILY)
Aqu2.1.24930_001	PREDICTED: hypothetical protein LOC100636843 [Amphimedon queenslandica]	81	1	3.97901e-24	0.57	0	-		no IPS match
Aqu2.1.24981_001	rna-binding protein 38	214	20	1.29304e-153	0.8	15	P:GO:0070935; F:GO:0005515; F:GO:0097157; F:GO:0000166; C:GO:0016607; F:GO:0003730; P:GO:0000381; C:GO:0005829; P:GO:0008285; P:GO:0006978; P:GO:0032956; P:GO:0030154; C:GO:0030529; P:GO:0006977; P:GO:0040012	-	IPR000504 (SMART); IPR012677 (G3DSA:3.30.70.GENE3D); IPR000504 (PFAM); PTHR24011 (PANTHER); PTHR24011:SF87 (PANTHER); IPR000504 (PROSITE_PROFILES); SSF54928 (SUPERFAMILY)
Aqu2.1.24982_001	adenylyl cyclase-associated protein 1	478	20	0	0.647	4	P:GO:0000902; F:GO:0003779; P:GO:0007010; F:GO:0016787	-	IPR006599 (SMART); IPR016098 (G3DSA:2.160.20.GENE3D); IPR013992 (PFAM); IPR013912 (PFAM); IPR001837 (PANTHER); IPR028417 (PROSITE_PATTERNS); IPR017901 (PROSITE_PROFILES); IPR013992 (SUPERFAMILY); IPR013912 (SUPERFAMILY)
Aqu2.1.24983_001	ef-hand domain-containing protein	352	20	0	0.6295	5	C:GO:0043231; C:GO:0044444; P:GO:0008152; C:GO:0016020; P:GO:0055085	-	IPR002067 (PRINTS); IPR018108 (PFAM); IPR023395 (G3DSA:1.50.40.GENE3D); PTHR24089:SF92 (PANTHER); PTHR24089 (PANTHER); IPR018108 (PROSITE_PROFILES); IPR018108 (PROSITE_PROFILES); IPR018108 (PROSITE_PROFILES); IPR023395 (SUPERFAMILY)
Aqu2.1.25008_001	ras-related protein rab-20-like	243	20	6.23789e-171	0.6075	2	F:GO:0005525; P:GO:0007264	-	IPR001806 (PRINTS); IPR005225 (TIGRFAM); G3DSA:3.40.50.300 (GENE3D); IPR001806 (PFAM); PTHR24073 (PANTHER); PTHR24073:SF136 (PANTHER); PS51419 (PROSITE_PROFILES); IPR027417 (SUPERFAMILY)
Aqu2.1.25014_001	receptor-type tyrosine-protein phosphatase s isoform x6	3502	20	0	0.572	17	F:GO:0050839; P:GO:0050775; P:GO:0007185; C:GO:0043005; F:GO:0005102; C:GO:0043231; F:GO:0005001; P:GO:0007157; P:GO:0009968; P:GO:0071310; P:GO:0007169; P:GO:0035335; P:GO:0043065; F:GO:0043168; P:GO:0097105; C:GO:0005887; P:GO:0006570	-	IPR000242 (PRINTS); IPR003595 (SMART); IPR003961 (SMART); IPR003599 (SMART); IPR000242 (SMART); IPR003598 (SMART); IPR013783 (G3DSA:2.60.40.GENE3D); IPR013783 (G3DSA:2.60.40.GENE3D); IPR003961 (PFAM); IPR013098 (PFAM); PF13895 (PFAM); IPR013783 (G3DSA:2.60.40.GENE3D); PF13927 (PFAM); IPR013783 (G3DSA:2.60.40.GENE3D); G3DSA:3.90.190.10 (GENE3D); IPR013783 (G3DSA:2.60.40.GENE3D); IPR013783 (G3DSA:2…
Aqu2.1.25015_001	---NA---	94	0			0	-		Coil (COILS); Coil (COILS)
Aqu2.1.25019_001	high mobility group protein b2-like	467	20	0	0.462	7	P:GO:0044763; P:GO:0006355; C:GO:0044424; P:GO:0048513; F:GO:0003677; P:GO:0048522; P:GO:0044767	-	Coil (COILS); IPR009071 (SMART); IPR009071 (G3DSA:1.10.30.GENE3D); IPR009071 (PFAM); IPR009071 (G3DSA:1.10.30.GENE3D); PTHR13711 (PANTHER); IPR009071 (PROSITE_PROFILES); IPR009071 (PROSITE_PROFILES); IPR009071 (SUPERFAMILY); IPR009071 (SUPERFAMILY)
Aqu2.1.25038_001	---NA---	97	0			0	-		no IPS match
Aqu2.1.25069_001	---NA---	371	0			0	-		SIGNAL_PEPTIDE_H_REGION (PHOBIUS); SIGNAL_PEPTIDE_C_REGION (PHOBIUS); SIGNAL_PEPTIDE_N_REGION (PHOBIUS); SIGNAL_PEPTIDE (PHOBIUS); NON_CYTOPLASMIC_DOMAIN (PHOBIUS)
Aqu2.1.25076_001	uncharacterized protein loc101886873	840	20	0	0.513	1	F:GO:0046872		IPR015880 (SMART); PTHR31912 (PANTHER); PTHR31912:SF1 (PANTHER); IPR007087 (PROSITE_PATTERNS)
Aqu2.1.25085_001	tyrosine-protein kinase isoform srk1-like	876	20	0	0.5855	3	F:GO:0016740; F:GO:0005515; P:GO:0007165	-	Coil (COILS); IPR003590 (SMART); G3DSA:3.80.10.10 (GENE3D); G3DSA:2.30.30.40 (GENE3D); IPR000488 (PFAM); IPR011029 (G3DSA:1.10.533.GENE3D); IPR001452 (PFAM); PTHR24106 (PANTHER); IPR001452 (PROSITE_PROFILES); IPR000488 (PROSITE_PROFILES); IPR001452 (SUPERFAMILY); SSF52047 (SUPERFAMILY); IPR011029 (SUPERFAMILY)
Aqu2.1.25129_001	fibrillin-1- partial	1278	20	0	0.575	4	F:GO:0005515; F:GO:0005509; F:GO:0005201; C:GO:0005578		IPR000742 (SMART); IPR001881 (SMART); G3DSA:2.10.25.10 (GENE3D); IPR026823 (PFAM); IPR001881 (PFAM); G3DSA:2.10.25.10 (GENE3D); PF14670 (PFAM); G3DSA:2.10.25.10 (GENE3D); G3DSA:2.10.25.10 (GENE3D); G3DSA:2.10.25.10 (GENE3D); G3DSA:2.10.25.10 (GENE3D); G3DSA:2.10.25.10 (GENE3D); G3DSA:2.10.25.10 (GENE3D); IPR011398 (PANTHER); IPR000152 (PROSITE_PATTERNS); IPR013032 (PROSITE_PATTERNS); IPR000152 (P…
Aqu2.1.25130_001	fibrillin-1- partial	1699	20	0	0.629	2	F:GO:0005515; F:GO:0005509		IPR000742 (SMART); IPR001881 (SMART); IPR000436 (SMART); PF14670 (PFAM); IPR026823 (PFAM); G3DSA:2.10.25.10 (GENE3D); G3DSA:2.10.25.10 (GENE3D); G3DSA:2.10.25.10 (GENE3D); G3DSA:2.10.25.10 (GENE3D); IPR001881 (PFAM); G3DSA:2.10.70.10 (GENE3D); G3DSA:2.10.70.10 (GENE3D); G3DSA:2.10.25.10 (GENE3D); G3DSA:2.10.25.10 (GENE3D); G3DSA:2.10.25.10 (GENE3D); G3DSA:2.10.25.10 (GENE3D); PTHR24034 (PANTHER);…
Aqu2.1.25131_001	fibrillin-1- partial	1017	20	0	0.5915	4	F:GO:0005509; F:GO:0005515; F:GO:0005201; C:GO:0005578		IPR001881 (SMART); IPR000742 (SMART); G3DSA:2.10.25.10 (GENE3D); G3DSA:2.10.25.10 (GENE3D); G3DSA:2.10.25.10 (GENE3D); IPR026823 (PFAM); G3DSA:2.10.25.10 (GENE3D); G3DSA:2.10.25.10 (GENE3D); G3DSA:2.10.25.10 (GENE3D); G3DSA:2.10.25.10 (GENE3D); G3DSA:2.10.25.10 (GENE3D); PF14670 (PFAM); IPR023413 (G3DSA:2.40.155.GENE3D); IPR001881 (PFAM); IPR011398 (PANTHER); IPR013032 (PROSITE_PATTERNS); IPR0001…
Aqu2.1.25174_001	dual specificity protein kinase shkc-like	369	20	0	0.711	3	F:GO:0004672; P:GO:0006468; F:GO:0005524	-	Coil (COILS); IPR000719 (PFAM); G3DSA:3.30.200.20 (GENE3D); G3DSA:1.10.510.10 (GENE3D); PTHR23257 (PANTHER); IPR017441 (PROSITE_PATTERNS); IPR000719 (PROSITE_PROFILES); IPR011009 (SUPERFAMILY)
Aqu2.1.25178_001	protein fam183a-like	140	20	4.75556e-101	0.728	0	-		PF14886 (PFAM)
Aqu2.1.25184_001	protein aurora borealis	625	20	4.90727e-17	0.49	1	P:GO:0007049	-	IPR023252 (PRINTS); PF15280 (PFAM); IPR023252 (PANTHER)
Aqu2.1.25193_001	---NA---	158	0			0	-		Coil (COILS)
Aqu2.1.25204_001	shc-transforming protein 1-like	149	20	8.381e-105	0.5875	21	P:GO:0006955; P:GO:0007507; P:GO:0031532; P:GO:0018108; P:GO:0016337; F:GO:0030971; P:GO:0019219; P:GO:0007596; P:GO:0030968; F:GO:0005159; C:GO:0043231; F:GO:0005158; F:GO:0005168; P:GO:0007173; P:GO:0071495; P:GO:0001525; P:GO:0071363; P:GO:0000187; C:GO:0044444; F:GO:0046875; C:GO:0005899	-	IPR006019 (PRINTS); IPR006020 (PFAM); IPR011993 (G3DSA:2.30.29.GENE3D); PTHR10337 (PANTHER); PTHR10337:SF1 (PANTHER); IPR006020 (PROSITE_PROFILES); SSF50729 (SUPERFAMILY)
Aqu2.1.25208_001	g-protein coupled receptor 64- partial	1057	20	0	0.5485	4	C:GO:0044464; P:GO:0007186; F:GO:0004930; C:GO:0016021	-	IPR000832 (PRINTS); IPR000832 (PFAM); PTHR12011 (PANTHER); NON_CYTOPLASMIC_DOMAIN (PHOBIUS); CYTOPLASMIC_DOMAIN (PHOBIUS); TRANSMEMBRANE (PHOBIUS); TRANSMEMBRANE (PHOBIUS); SIGNAL_PEPTIDE_N_REGION (PHOBIUS); CYTOPLASMIC_DOMAIN (PHOBIUS); SIGNAL_PEPTIDE_C_REGION (PHOBIUS); TRANSMEMBRANE (PHOBIUS); NON_CYTOPLASMIC_DOMAIN (PHOBIUS); TRANSMEMBRANE (PHOBIUS); CYTOPLASMIC_DOMAIN (PHOBIUS); TRANSMEMBRAN…
Aqu2.1.25210_001	g-protein coupled receptor 64- partial	1473	20	0	0.5855	4	F:GO:0004930; C:GO:0005886; C:GO:0016021; P:GO:0007218	-	IPR000832 (PRINTS); IPR000203 (SMART); IPR001879 (SMART); IPR000203 (PFAM); IPR001879 (PFAM); IPR000832 (PFAM); PTHR12011 (PANTHER); SIGNAL_PEPTIDE (PHOBIUS); NON_CYTOPLASMIC_DOMAIN (PHOBIUS); TRANSMEMBRANE (PHOBIUS); TRANSMEMBRANE (PHOBIUS); NON_CYTOPLASMIC_DOMAIN (PHOBIUS); SIGNAL_PEPTIDE_C_REGION (PHOBIUS); CYTOPLASMIC_DOMAIN (PHOBIUS); TRANSMEMBRANE (PHOBIUS); TRANSMEMBRANE (PHOBIUS); TRANSME…
Aqu2.1.25215_001	PREDICTED: hypothetical protein LOC100636215 [Amphimedon queenslandica]	340	1	1.91675e-11	0.52	1	F:GO:0005515		CYTOPLASMIC_DOMAIN (PHOBIUS); NON_CYTOPLASMIC_DOMAIN (PHOBIUS); TRANSMEMBRANE (PHOBIUS); IPR007110 (PROSITE_PROFILES); TMhelix (TMHMM)
Aqu2.1.25219_001	achain crystal structure of engineered northeast structural genomics consortium target	844	20	2.44071e-114	0.593	6	P:GO:0071704; P:GO:0044238; F:GO:0003824; F:GO:0005524; F:GO:0005515; P:GO:0007165	-	IPR002110 (SMART); IPR020683 (G3DSA:1.25.40.GENE3D); IPR011029 (G3DSA:1.10.533.GENE3D); IPR020683 (PFAM); G3DSA:3.40.50.300 (GENE3D); PTHR24193 (PANTHER); IPR002110 (PROSITE_PROFILES); IPR020683 (PROSITE_PROFILES); IPR002110 (PROSITE_PROFILES); IPR000488 (PROSITE_PROFILES); IPR020683 (SUPERFAMILY); IPR011029 (SUPERFAMILY); IPR027417 (SUPERFAMILY)
Aqu2.1.25221_001	coiled-coil domain-containing protein 112	478	20	1.75014e-51	0.5475	0	-		Coil (COILS); Coil (COILS); Coil (COILS); Coil (COILS); Coil (COILS); PTHR21549 (PANTHER); PTHR21549:SF0 (PANTHER)
Aqu2.1.25223_001	serine threonine-protein kinase ulk3	462	20	0	0.7135	7	P:GO:0045879; P:GO:0045880; P:GO:0046777; F:GO:0004674; F:GO:0005524; C:GO:0005737; P:GO:0009069	EC:2.7.11.0	IPR002290 (SMART); IPR007330 (SMART); G3DSA:1.20.58.280 (GENE3D); IPR000719 (PFAM); G3DSA:3.30.200.20 (GENE3D); IPR007330 (PFAM); G3DSA:1.20.58.280 (GENE3D); G3DSA:1.10.510.10 (GENE3D); PTHR24348:SF20 (PANTHER); PTHR24348 (PANTHER); IPR008271 (PROSITE_PATTERNS); IPR017441 (PROSITE_PATTERNS); IPR000719 (PROSITE_PROFILES); SSF116846 (SUPERFAMILY); IPR011009 (SUPERFAMILY); SSF116846 (SUPERFAMILY)
Aqu2.1.25305_001	---NA---	74	0			0	-		no IPS match
Aqu2.1.25318_001	sh3 and px domain-containing protein 2b-like	993	20	3.17549e-29	0.5745	3	F:GO:0035091; F:GO:0003676; F:GO:0008270		Coil (COILS); IPR001683 (SMART); IPR001683 (PFAM); IPR021129 (PFAM); IPR013761 (G3DSA:1.10.150.GENE3D); IPR001683 (G3DSA:3.30.1520.GENE3D); PTHR15706 (PANTHER); IPR001683 (PROSITE_PROFILES); IPR001878 (PROSITE_PROFILES); IPR013761 (SUPERFAMILY); IPR001683 (SUPERFAMILY)
Aqu2.1.25321_001	eukaryotic translation initiation factor 6	245	20	7.61671e-177	0.917	8	F:GO:0003743; C:GO:0005730; P:GO:0007229; C:GO:0005638; F:GO:0043022; P:GO:0042256; C:GO:0005840; P:GO:0006446	-	IPR002769 (PIRSF); IPR002769 (SMART); IPR002769 (TIGRFAM); IPR002769 (PFAM); G3DSA:3.75.10.10 (GENE3D); PTHR10784:SF0 (PANTHER); IPR002769 (PANTHER); IPR002769 (HAMAP); SSF55909 (SUPERFAMILY)
Aqu2.1.25340_001	extracellular protease	350	20	3.74399e-68	0.5455	1	F:GO:0008237		PF14521 (PFAM); IPR024079 (G3DSA:3.40.390.GENE3D); SIGNAL_PEPTIDE_N_REGION (PHOBIUS); NON_CYTOPLASMIC_DOMAIN (PHOBIUS); SIGNAL_PEPTIDE (PHOBIUS); SIGNAL_PEPTIDE_C_REGION (PHOBIUS); SIGNAL_PEPTIDE_H_REGION (PHOBIUS); SignalP-noTM (SIGNALP_GRAM_NEGATIVE); SignalP-TM (SIGNALP_GRAM_POSITIVE); SignalP-noTM (SIGNALP_EUK); SSF55486 (SUPERFAMILY)
Aqu2.1.25341_001	---NA---	22	0			0	-		no IPS match
Aqu2.1.25342_001	fibrinogen c domain-containing protein 1-like	291	20	0	0.7715	1	P:GO:0044763	-	IPR002181 (SMART); IPR014715 (G3DSA:4.10.530.GENE3D); IPR014716 (G3DSA:3.90.215.GENE3D); IPR002181 (PFAM); PTHR19143 (PANTHER); IPR020837 (PROSITE_PATTERNS); IPR002181 (PROSITE_PROFILES); IPR002181 (SUPERFAMILY)
Aqu2.1.25399_001	lipoprotein	551	20	1.20618e-12	0.5735	3	F:GO:0008061; P:GO:0006030; C:GO:0005576		IPR011936 (TIGRFAM); IPR011936 (PFAM); TRANSMEMBRANE (PHOBIUS); CYTOPLASMIC_DOMAIN (PHOBIUS); CYTOPLASMIC_DOMAIN (PHOBIUS); NON_CYTOPLASMIC_DOMAIN (PHOBIUS); TRANSMEMBRANE (PHOBIUS); TMhelix (TMHMM); TMhelix (TMHMM)
Aqu2.1.25400_001	tetratricopeptide repeat protein 39b	599	20	9.5032e-155	0.6205	1	F:GO:0005515		IPR019734 (SMART); IPR011990 (G3DSA:1.25.40.GENE3D); IPR019412 (PFAM); PTHR31859 (PANTHER); PTHR31859:SF0 (PANTHER); SSF48452 (SUPERFAMILY)
Aqu2.1.25405_001	transcription factor btf3 isoform x2	166	20	8.15859e-118	0.754	6	P:GO:0072643; P:GO:0002456; F:GO:0005515; P:GO:0001701; C:GO:0005886; P:GO:0006366	-	IPR002715 (PFAM); PTHR10351 (PANTHER); IPR002715 (PROSITE_PROFILES)
Aqu2.1.25455_001	---NA---	168	0			0	-		NON_CYTOPLASMIC_DOMAIN (PHOBIUS); CYTOPLASMIC_DOMAIN (PHOBIUS); TRANSMEMBRANE (PHOBIUS); TMhelix (TMHMM)
Aqu2.1.25484_001	reverse transcriptase	669	20	2.07552e-58	0.438	3	P:GO:0006278; F:GO:0003723; F:GO:0003964		IPR000477 (PFAM); CYTOPLASMIC_DOMAIN (PHOBIUS); TRANSMEMBRANE (PHOBIUS); NON_CYTOPLASMIC_DOMAIN (PHOBIUS); SSF56672 (SUPERFAMILY)
Aqu2.1.25556_001	---NA---	66	0			0	-		no IPS match
Aqu2.1.25559_001	ankyrin repeat domain-containing protein 50- partial	502	20	8.56446e-148	0.6315	1	F:GO:0005515		IPR002110 (SMART); IPR020683 (PFAM); IPR020683 (G3DSA:1.25.40.GENE3D); IPR002110 (PFAM); IPR020683 (G3DSA:1.25.40.GENE3D); PTHR24198 (PANTHER); IPR020683 (PROSITE_PROFILES); IPR002110 (PROSITE_PROFILES); IPR002110 (PROSITE_PROFILES); IPR002110 (PROSITE_PROFILES); IPR002110 (PROSITE_PROFILES); IPR002110 (PROSITE_PROFILES); IPR002110 (PROSITE_PROFILES); IPR020683 (SUPERFAMILY)
Aqu2.1.25560_001	ankyrin repeat protein l93-like	650	20	0	0.686	2	F:GO:0005515; P:GO:0007165	-	IPR006624 (SMART); IPR002110 (SMART); IPR020683 (PFAM); PF13857 (PFAM); IPR020683 (G3DSA:1.25.40.GENE3D); IPR011029 (G3DSA:1.10.533.GENE3D); PTHR24198 (PANTHER); NON_CYTOPLASMIC_DOMAIN (PHOBIUS); TRANSMEMBRANE (PHOBIUS); CYTOPLASMIC_DOMAIN (PHOBIUS); TRANSMEMBRANE (PHOBIUS); NON_CYTOPLASMIC_DOMAIN (PHOBIUS); IPR000488 (PROSITE_PROFILES); IPR002110 (PROSITE_PROFILES); IPR020683 (PROSITE_PROFILES);…
Aqu2.1.25565_001	sorting nexin-27	539	20	0	0.6455	12	C:GO:0043234; F:GO:0032266; C:GO:0005769; F:GO:0016740; P:GO:0016197; C:GO:0044446; F:GO:0005515; C:GO:0044425; P:GO:0042493; P:GO:0006886; C:GO:0005634; P:GO:0007165	-	IPR001683 (SMART); IPR001478 (SMART); IPR001683 (G3DSA:3.30.1520.GENE3D); IPR000159 (PFAM); IPR001683 (PFAM); G3DSA:3.10.20.90 (GENE3D); G3DSA:2.30.42.10 (GENE3D); IPR001478 (PFAM); PTHR12431 (PANTHER); IPR028667 (PTHR12431:PANTHER); IPR001683 (PROSITE_PROFILES); IPR001478 (PROSITE_PROFILES); IPR000159 (PROSITE_PROFILES); IPR001478 (SUPERFAMILY); IPR001683 (SUPERFAMILY)
Aqu2.1.25567_001	protein efr3 homolog b-like	778	20	0	0.5585	1	F:GO:0005488		PTHR12444 (PANTHER); IPR016024 (SUPERFAMILY)
Aqu2.1.25585_001	leucine-rich repeat-containing protein 59	268	20	0	0.62	5	C:GO:0043231; C:GO:0044444; C:GO:0016020; C:GO:0044446; F:GO:0005515	-	Coil (COILS); IPR001611 (PFAM); PF13855 (PFAM); G3DSA:3.80.10.10 (GENE3D); PTHR23155 (PANTHER); CYTOPLASMIC_DOMAIN (PHOBIUS); TRANSMEMBRANE (PHOBIUS); NON_CYTOPLASMIC_DOMAIN (PHOBIUS); SSF52058 (SUPERFAMILY); TMhelix (TMHMM)
Aqu2.1.25609_001	transcriptional sir2 family protein	419	20	0	0.6785	1	F:GO:0070403	-	IPR026591 (G3DSA:3.30.1600.GENE3D); IPR003000 (PFAM); G3DSA:3.40.50.1220 (GENE3D); IPR003000 (PANTHER); IPR026590 (PROSITE_PROFILES); SSF52467 (SUPERFAMILY)
Aqu2.1.25623_001	zinc finger bed domain-containing protein 4-like	350	5	2.33092e-12	0.566	3	F:GO:0003676; F:GO:0046983; F:GO:0003677		Coil (COILS)
Aqu2.1.25658_001	---NA---	156	0			0	-		no IPS match
Aqu2.1.25667_001	---NA---	171	0			0	-		no IPS match
Aqu2.1.25677_001	frizzled and frizzled protein domain containing protein	264	20	0	0.544	4	P:GO:0007275; F:GO:0042813; P:GO:0016055; F:GO:0005515	-	IPR020067 (PFAM); IPR020067 (G3DSA:1.10.2000.GENE3D); IPR026543 (PTHR11309:PANTHER); IPR015526 (PANTHER); NON_CYTOPLASMIC_DOMAIN (PHOBIUS); SIGNAL_PEPTIDE (PHOBIUS); CYTOPLASMIC_DOMAIN (PHOBIUS); SIGNAL_PEPTIDE_C_REGION (PHOBIUS); SIGNAL_PEPTIDE_H_REGION (PHOBIUS); TRANSMEMBRANE (PHOBIUS); SIGNAL_PEPTIDE_N_REGION (PHOBIUS); IPR020067 (PROSITE_PROFILES); SignalP-TM (SIGNALP_GRAM_POSITIVE); SignalP…
Aqu2.1.25679_001	---NA---	36	0			0	-		TRANSMEMBRANE (PHOBIUS); NON_CYTOPLASMIC_DOMAIN (PHOBIUS); CYTOPLASMIC_DOMAIN (PHOBIUS); TMhelix (TMHMM)
Aqu2.1.25685_001	leucine-rich repeat-containing protein 20-like isoform 2	213	20	8.8775e-31	0.599	2	P:GO:0003012; F:GO:0005515	-	Coil (COILS); PR00019 (PRINTS); IPR025875 (PFAM); IPR001611 (PFAM); PF13504 (PFAM); G3DSA:3.80.10.10 (GENE3D); PF13516 (PFAM); PTHR16083 (PANTHER); IPR001611 (PROSITE_PROFILES); SSF52058 (SUPERFAMILY)
Aqu2.1.25739_001	---NA---	69	0			0	-		NON_CYTOPLASMIC_DOMAIN (PHOBIUS); TRANSMEMBRANE (PHOBIUS); CYTOPLASMIC_DOMAIN (PHOBIUS)
Aqu2.1.25751_001	cytochrome c oxidase assembly protein mitochondrial-like	253	20	0	0.7515	2	F:GO:0005507; C:GO:0016020	-	IPR007533 (PIRSF); IPR023471 (G3DSA:2.60.370.GENE3D); IPR007533 (PFAM); IPR007533 (PANTHER); PTHR21320:SF0 (PANTHER); NON_CYTOPLASMIC_DOMAIN (PHOBIUS); SIGNAL_PEPTIDE_C_REGION (PHOBIUS); CYTOPLASMIC_DOMAIN (PHOBIUS); SIGNAL_PEPTIDE_N_REGION (PHOBIUS); SIGNAL_PEPTIDE (PHOBIUS); TRANSMEMBRANE (PHOBIUS); SIGNAL_PEPTIDE_H_REGION (PHOBIUS); IPR007533 (HAMAP); IPR023471 (SUPERFAMILY)
Aqu2.1.25782_001	---NA---	64	0			0	-		no IPS match
Aqu2.1.25795_001	PREDICTED: hypothetical protein LOC100639448 [Amphimedon queenslandica]	122	1	9.02757e-16	0.69	0	-		no IPS match
Aqu2.1.25797_001	ankyrin repeat-containing protein	1075	20	5.3342e-168	0.549	7	P:GO:0071704; P:GO:0044238; F:GO:0005524; F:GO:0003824; P:GO:0044237; F:GO:0005515; P:GO:0007165	-	IPR002110 (SMART); IPR011029 (G3DSA:1.10.533.GENE3D); IPR020683 (G3DSA:1.25.40.GENE3D); G3DSA:3.40.50.300 (GENE3D); IPR011029 (G3DSA:1.10.533.GENE3D); IPR020683 (PFAM); PTHR24198 (PANTHER); IPR000488 (PROSITE_PROFILES); IPR020683 (PROSITE_PROFILES); IPR000488 (PROSITE_PROFILES); IPR011029 (SUPERFAMILY); IPR011029 (SUPERFAMILY); IPR027417 (SUPERFAMILY); IPR020683 (SUPERFAMILY)
Aqu2.1.25804_001	e3 sumo-protein ligase 2	708	20	2.28312e-67	0.42	2	P:GO:0009987; F:GO:0005515	-	IPR011990 (G3DSA:1.25.40.GENE3D); PTHR23138 (PANTHER); PTHR23138:SF62 (PANTHER); IPR013026 (PROSITE_PROFILES); SSF48452 (SUPERFAMILY)
Aqu2.1.25805_001	uncharacterized protein partial	137	20	1.08416e-10	0.5195	3	F:GO:0003723; P:GO:0006278; F:GO:0003964		no IPS match
Aqu2.1.25808_001	methylcrotonoyl- carboxylase subunit mitochondrial	713	20	0	0.6745	13	C:GO:0005829; F:GO:0046872; F:GO:0005524; F:GO:0005515; C:GO:0005759; F:GO:0004075; F:GO:0004485; P:GO:0006768; P:GO:0006633; C:GO:0009343; P:GO:0006550; P:GO:0006552; P:GO:0006574	EC:6.3.4.14; EC:6.4.1.4	IPR005482 (SMART); IPR013816 (G3DSA:3.30.470.GENE3D); G3DSA:2.40.50.100 (GENE3D); IPR013815 (G3DSA:3.30.1490.GENE3D); IPR005479 (PFAM); IPR005481 (PFAM); IPR016185 (G3DSA:3.40.50.GENE3D); IPR000089 (PFAM); IPR005482 (PFAM); PTHR18866:SF17 (PANTHER); PTHR18866 (PANTHER); IPR005479 (PROSITE_PATTERNS); IPR000089 (PROSITE_PROFILES); IPR011761 (PROSITE_PROFILES); IPR011764 (PROSITE_PROFILES); SSF56059…
Aqu2.1.25831_001	uncharacterized protein partial	257	20	1.11417e-20	0.489	5	F:GO:0046872; F:GO:0008270; P:GO:0009058; F:GO:0003824; F:GO:0030170		no IPS match
Aqu2.1.25874_001	p protein	840	20	0	0.7125	4	C:GO:0016021; P:GO:0006814; P:GO:0055085; F:GO:0005215	-	Coil (COILS); IPR004680 (PFAM); IPR001898 (PFAM); PTHR10283 (PANTHER); PTHR10283:SF33 (PANTHER); NON_CYTOPLASMIC_DOMAIN (PHOBIUS); CYTOPLASMIC_DOMAIN (PHOBIUS); TRANSMEMBRANE (PHOBIUS); TRANSMEMBRANE (PHOBIUS); CYTOPLASMIC_DOMAIN (PHOBIUS); TRANSMEMBRANE (PHOBIUS); CYTOPLASMIC_DOMAIN (PHOBIUS); TRANSMEMBRANE (PHOBIUS); NON_CYTOPLASMIC_DOMAIN (PHOBIUS); TRANSMEMBRANE (PHOBIUS); CYTOPLASMIC_DOMAIN …
Aqu2.1.25875_001	bactericidal permeability-increasing	491	20	0	0.59	1	F:GO:0008289	-	IPR001124 (SMART); IPR017942 (SMART); G3DSA:3.15.10.10 (GENE3D); IPR001124 (PFAM); G3DSA:3.15.20.10 (GENE3D); IPR017942 (PFAM); PTHR10504:SF53 (PANTHER); PTHR10504 (PANTHER); SIGNAL_PEPTIDE_N_REGION (PHOBIUS); SIGNAL_PEPTIDE (PHOBIUS); SIGNAL_PEPTIDE_H_REGION (PHOBIUS); NON_CYTOPLASMIC_DOMAIN (PHOBIUS); SIGNAL_PEPTIDE_C_REGION (PHOBIUS); SignalP-TM (SIGNALP_GRAM_POSITIVE); SignalP-noTM (SIGNALP_E…
Aqu2.1.25876_001	bactericidal permeability-increasing	209	20	1.3982e-103	0.6105	1	F:GO:0008289	-	IPR017942 (SMART); G3DSA:3.15.10.10 (GENE3D); IPR017942 (PFAM); PTHR10504:SF53 (PANTHER); PTHR10504 (PANTHER); SIGNAL_PEPTIDE_H_REGION (PHOBIUS); SIGNAL_PEPTIDE_N_REGION (PHOBIUS); SIGNAL_PEPTIDE (PHOBIUS); NON_CYTOPLASMIC_DOMAIN (PHOBIUS); SIGNAL_PEPTIDE_C_REGION (PHOBIUS); SignalP-noTM (SIGNALP_EUK); SignalP-TM (SIGNALP_GRAM_POSITIVE); IPR017943 (SUPERFAMILY)
Aqu2.1.25890_001	npc2p	159	15	7.35515e-33	0.472	0	-		IPR003172 (SMART); IPR003172 (PFAM); G3DSA:2.70.220.10 (GENE3D); SIGNAL_PEPTIDE_N_REGION (PHOBIUS); NON_CYTOPLASMIC_DOMAIN (PHOBIUS); SIGNAL_PEPTIDE (PHOBIUS); SIGNAL_PEPTIDE_C_REGION (PHOBIUS); SIGNAL_PEPTIDE_H_REGION (PHOBIUS); SignalP-TM (SIGNALP_GRAM_POSITIVE); SignalP-noTM (SIGNALP_EUK); IPR014756 (SUPERFAMILY)
Aqu2.1.25894_001	vasa-like protein	818	20	0	0.7665	4	F:GO:0008026; F:GO:0003676; F:GO:0005524; F:GO:0008270	-	IPR001650 (SMART); IPR014001 (SMART); IPR011545 (PFAM); G3DSA:3.40.50.300 (GENE3D); G3DSA:3.40.50.300 (GENE3D); IPR001650 (PFAM); PTHR24031:SF9 (PANTHER); PTHR24031 (PANTHER); IPR000629 (PROSITE_PATTERNS); IPR014014 (PROSITE_PROFILES); IPR001650 (PROSITE_PROFILES); IPR014001 (PROSITE_PROFILES); IPR027417 (SUPERFAMILY)
Aqu2.1.25898_001	phosphatidylinositol phosphatase ptprq	1264	20	0	0.5005	1	F:GO:0005515		Coil (COILS); IPR003961 (SMART); IPR003961 (PFAM); IPR013783 (G3DSA:2.60.40.GENE3D); IPR013783 (G3DSA:2.60.40.GENE3D); IPR013783 (G3DSA:2.60.40.GENE3D); IPR013783 (G3DSA:2.60.40.GENE3D); PTHR10489 (PANTHER); TRANSMEMBRANE (PHOBIUS); SIGNAL_PEPTIDE_C_REGION (PHOBIUS); SIGNAL_PEPTIDE (PHOBIUS); CYTOPLASMIC_DOMAIN (PHOBIUS); NON_CYTOPLASMIC_DOMAIN (PHOBIUS); SIGNAL_PEPTIDE_N_REGION (PHOBIUS); SIGNAL…
Aqu2.1.25945_001	PREDICTED: hypothetical protein LOC100632806 [Amphimedon queenslandica]	308	20	6.71551e-115	0.5715	6	P:GO:0007165; F:GO:0005524; F:GO:0004672; F:GO:0000166; P:GO:0006468; F:GO:0016772		Coil (COILS); Coil (COILS)
Aqu2.1.25964_001	uncharacterized protein loc582807	55	4	2.37144e-08	0.5875	0	-		no IPS match
Aqu2.1.26005_001	---NA---	131	0			0	-		no IPS match
Aqu2.1.26006_001	sodium potassium calcium exchanger 6-like	838	20	0	0.629	2	P:GO:0055085; C:GO:0016021		IPR004837 (PFAM); PTHR12266:SF0 (PANTHER); PTHR12266 (PANTHER); NON_CYTOPLASMIC_DOMAIN (PHOBIUS); TRANSMEMBRANE (PHOBIUS); TRANSMEMBRANE (PHOBIUS); TRANSMEMBRANE (PHOBIUS); CYTOPLASMIC_DOMAIN (PHOBIUS); NON_CYTOPLASMIC_DOMAIN (PHOBIUS); TRANSMEMBRANE (PHOBIUS); CYTOPLASMIC_DOMAIN (PHOBIUS); TRANSMEMBRANE (PHOBIUS); TRANSMEMBRANE (PHOBIUS); CYTOPLASMIC_DOMAIN (PHOBIUS); TRANSMEMBRANE (PHOBIUS); TR…
Aqu2.1.26013_001	trafficking protein particle complex subunit 11-like	1121	20	5.57609e-139	0.534	2	P:GO:0060041; P:GO:0001889	-	IPR021773 (PFAM); IPR012880 (PFAM); PTHR14374 (PANTHER)
Aqu2.1.26015_001	---NA---	31	0			0	-		no IPS match
Aqu2.1.26016_001	calpain-a-like isoform 1	685	20	0	0.6415	4	C:GO:0005622; P:GO:0006508; F:GO:0004198; F:GO:0005509	-	IPR022684 (PRINTS); IPR001300 (SMART); IPR002048 (SMART); IPR022683 (SMART); IPR022682 (PFAM); G3DSA:3.90.70.10 (GENE3D); G3DSA:2.60.120.380 (GENE3D); IPR011992 (G3DSA:1.10.238.GENE3D); PF13833 (PFAM); IPR002048 (PFAM); IPR001300 (PFAM); PTHR10183:SF45 (PANTHER); PTHR10183 (PANTHER); IPR000169 (PROSITE_PATTERNS); IPR018247 (PROSITE_PATTERNS); IPR001751 (PROSITE_PATTERNS); IPR001300 (PROSITE_PROFI…
Aqu2.1.26025_001	e3 ubiquitin-protein ligase chfr isoform 3	561	20	0	0.555	8	P:GO:0000278; F:GO:0008270; P:GO:0022402; P:GO:0019941; F:GO:0016874; P:GO:0016567; C:GO:0005634; F:GO:0005515	-	IPR000253 (SMART); IPR001841 (SMART); IPR000253 (PFAM); PF13920 (PFAM); IPR000253 (G3DSA:2.60.200.GENE3D); IPR013083 (G3DSA:3.30.40.GENE3D); PTHR16079 (PANTHER); PTHR16079:SF0 (PANTHER); IPR017907 (PROSITE_PATTERNS); IPR001841 (PROSITE_PROFILES); IPR000253 (PROSITE_PROFILES); IPR008984 (SUPERFAMILY); SSF57850 (SUPERFAMILY)
Aqu2.1.26079_001	integrator complex subunit 4	1043	20	0	0.6855	3	F:GO:0005515; P:GO:0016180; C:GO:0032039	-	IPR011989 (G3DSA:1.25.10.GENE3D); PTHR20938 (PANTHER); PTHR20938:SF0 (PANTHER); TRANSMEMBRANE (PHOBIUS); CYTOPLASMIC_DOMAIN (PHOBIUS); NON_CYTOPLASMIC_DOMAIN (PHOBIUS); IPR016024 (SUPERFAMILY)
Aqu2.1.26080_001	uncharacterized transposase-like protein	56	20	6.70413e-19	0.659	0	-		IPR024445 (PFAM); PTHR31524 (PANTHER)
Aqu2.1.26090_001	uncharacterized protein c11orf70 homolog	262	20	5.00255e-162	0.6395	3	F:GO:0003674; P:GO:0008150; C:GO:0005575		PF14926 (PFAM); PTHR31078 (PANTHER)
Aqu2.1.26096_001	fbox-lrr protein	312	20	9.89103e-99	0.5475	3	P:GO:0007165; F:GO:0046872; F:GO:0008270		Coil (COILS); Coil (COILS); IPR003590 (SMART); G3DSA:3.80.10.10 (GENE3D); PF13516 (PFAM); PTHR24106 (PANTHER); SSF52047 (SUPERFAMILY)
Aqu2.1.26123_001	lysosomal acid phosphatase-like	426	20	1.20625e-116	0.605	3	F:GO:0003993; P:GO:0006771; P:GO:0019497	EC:3.1.3.2	IPR000560 (PFAM); G3DSA:3.40.50.1240 (GENE3D); PTHR11567:SF26 (PANTHER); PTHR11567 (PANTHER); IPR000560 (PROSITE_PATTERNS); TRANSMEMBRANE (PHOBIUS); CYTOPLASMIC_DOMAIN (PHOBIUS); SIGNAL_PEPTIDE_N_REGION (PHOBIUS); SIGNAL_PEPTIDE_H_REGION (PHOBIUS); NON_CYTOPLASMIC_DOMAIN (PHOBIUS); SIGNAL_PEPTIDE (PHOBIUS); SIGNAL_PEPTIDE_C_REGION (PHOBIUS); SignalP-noTM (SIGNALP_EUK); SSF53254 (SUPERFAMILY); TMh…
Aqu2.1.26163_001	---NA---	1114	0			1	F:GO:0005515		IPR013783 (G3DSA:2.60.40.GENE3D); IPR013783 (G3DSA:2.60.40.GENE3D); NON_CYTOPLASMIC_DOMAIN (PHOBIUS); TRANSMEMBRANE (PHOBIUS); SIGNAL_PEPTIDE_H_REGION (PHOBIUS); NON_CYTOPLASMIC_DOMAIN (PHOBIUS); CYTOPLASMIC_DOMAIN (PHOBIUS); SIGNAL_PEPTIDE_N_REGION (PHOBIUS); SIGNAL_PEPTIDE_C_REGION (PHOBIUS); TRANSMEMBRANE (PHOBIUS); CYTOPLASMIC_DOMAIN (PHOBIUS); TRANSMEMBRANE (PHOBIUS); SIGNAL_PEPTIDE (PHOBIUS…
Aqu2.1.26164_001	---NA---	435	0			0	-		CYTOPLASMIC_DOMAIN (PHOBIUS); SIGNAL_PEPTIDE_N_REGION (PHOBIUS); NON_CYTOPLASMIC_DOMAIN (PHOBIUS); SIGNAL_PEPTIDE_C_REGION (PHOBIUS); SIGNAL_PEPTIDE (PHOBIUS); SIGNAL_PEPTIDE_H_REGION (PHOBIUS); TRANSMEMBRANE (PHOBIUS); SignalP-TM (SIGNALP_GRAM_POSITIVE); SignalP-noTM (SIGNALP_EUK); TMhelix (TMHMM)
Aqu2.1.26169_001	---NA---	271	0			0	-		SIGNAL_PEPTIDE_N_REGION (PHOBIUS); NON_CYTOPLASMIC_DOMAIN (PHOBIUS); SIGNAL_PEPTIDE_C_REGION (PHOBIUS); CYTOPLASMIC_DOMAIN (PHOBIUS); SIGNAL_PEPTIDE (PHOBIUS); TRANSMEMBRANE (PHOBIUS); SIGNAL_PEPTIDE_H_REGION (PHOBIUS); SignalP-noTM (SIGNALP_EUK); TMhelix (TMHMM)
Aqu2.1.26173_001	---NA---	589	0			1	F:GO:0005515		IPR003961 (SMART); IPR013783 (G3DSA:2.60.40.GENE3D); IPR003961 (PFAM); NON_CYTOPLASMIC_DOMAIN (PHOBIUS); CYTOPLASMIC_DOMAIN (PHOBIUS); TRANSMEMBRANE (PHOBIUS); IPR003961 (PROSITE_PROFILES); IPR003961 (SUPERFAMILY); TMhelix (TMHMM)
Aqu2.1.26198_001	rap1 gtpase-gdp dissociation stimulator 1 isoform x3	604	20	1.58458e-32	0.466	1	F:GO:0005515		Coil (COILS); IPR000225 (SMART); IPR011989 (G3DSA:1.25.10.GENE3D); PTHR10957 (PANTHER); PTHR10957:SF1 (PANTHER); IPR016024 (SUPERFAMILY); IPR016024 (SUPERFAMILY)
Aqu2.1.26222_001	deleted in malignant brain tumors 1	2289	20	1.13393e-41	0.384	4	C:GO:0016020; F:GO:0005044; F:GO:0005515; F:GO:0005509		IPR003598 (SMART); IPR017448 (SMART); IPR000742 (SMART); IPR001881 (SMART); IPR003599 (SMART); IPR001190 (PFAM); IPR013783 (G3DSA:2.60.40.GENE3D); IPR013106 (PFAM); G3DSA:3.10.250.10 (GENE3D); G3DSA:2.10.25.10 (GENE3D); IPR013783 (G3DSA:2.60.40.GENE3D); PF13895 (PFAM); PTHR22576:SF1 (PANTHER); PTHR22576 (PANTHER); IPR013032 (PROSITE_PATTERNS); IPR000152 (PROSITE_PATTERNS); SIGNAL_PEPTIDE_N_REGION…
Aqu2.1.26305_001	translin-associated factor x-interacting protein 1-like	319	20	2.86949e-131	0.637	1	C:GO:0005737		Coil (COILS); Coil (COILS); Coil (COILS); PTHR16306 (PANTHER)
Aqu2.1.26328_001	acyl- -binding domain-containing protein 5 isoform 2	278	20	2.38993e-74	0.725	6	F:GO:0046873; C:GO:0005777; P:GO:0055085; C:GO:0016020; P:GO:0030001; F:GO:0000062	-	IPR000582 (PRINTS); IPR000582 (PFAM); IPR014352 (G3DSA:1.20.80.GENE3D); PTHR23310 (PANTHER); PTHR23310:SF6 (PANTHER); IPR000582 (PROSITE_PROFILES); IPR000582 (SUPERFAMILY)
Aqu2.1.26340_001	caspase-8- partial	510	20	2.1901e-27	0.4685	11	P:GO:0048731; F:GO:0005515; P:GO:0042981; P:GO:0097190; C:GO:0043234; P:GO:0048522; P:GO:0009966; C:GO:0043229; P:GO:0044767; P:GO:0006508; F:GO:0004197	-	Coil (COILS); IPR015917 (PRINTS); IPR015917 (SMART); IPR011600 (PFAM); G3DSA:3.40.50.1460 (GENE3D); PTHR10454:SF126 (PANTHER); PTHR10454 (PANTHER); IPR002138 (PROSITE_PROFILES); IPR001309 (PROSITE_PROFILES); SSF52129 (SUPERFAMILY)
Aqu2.1.26368_001	major facilitator superfamily domain-containing protein 8	714	20	0	0.593	4	C:GO:0005886; F:GO:0005215; P:GO:0055085; C:GO:0016021		IPR001958 (PRINTS); G3DSA:1.20.1250.20 (GENE3D); IPR011701 (PFAM); PTHR24003:SF40 (PANTHER); PTHR24003 (PANTHER); SIGNAL_PEPTIDE_H_REGION (PHOBIUS); SIGNAL_PEPTIDE (PHOBIUS); CYTOPLASMIC_DOMAIN (PHOBIUS); TRANSMEMBRANE (PHOBIUS); NON_CYTOPLASMIC_DOMAIN (PHOBIUS); CYTOPLASMIC_DOMAIN (PHOBIUS); NON_CYTOPLASMIC_DOMAIN (PHOBIUS); CYTOPLASMIC_DOMAIN (PHOBIUS); CYTOPLASMIC_DOMAIN (PHOBIUS); TRANSMEMBRA…
Aqu2.1.26376_001	ankyrin repeat and ibr domain-containing protein 1-like	271	1	1.23944e-22	0.59	2	F:GO:0046872; F:GO:0008270		CYTOPLASMIC_DOMAIN (PHOBIUS); TRANSMEMBRANE (PHOBIUS); NON_CYTOPLASMIC_DOMAIN (PHOBIUS); TRANSMEMBRANE (PHOBIUS); CYTOPLASMIC_DOMAIN (PHOBIUS); CYTOPLASMIC_DOMAIN (PHOBIUS); TRANSMEMBRANE (PHOBIUS); NON_CYTOPLASMIC_DOMAIN (PHOBIUS); TRANSMEMBRANE (PHOBIUS); TRANSMEMBRANE (PHOBIUS); NON_CYTOPLASMIC_DOMAIN (PHOBIUS); TMhelix (TMHMM); TMhelix (TMHMM); TMhelix (TMHMM); TMhelix (TMHMM); TMhelix (TMHMM)
Aqu2.1.26404_001	caspase-8-like isoform x2	348	20	5.02675e-28	0.5225	8	P:GO:0048731; P:GO:0051716; C:GO:0044424; P:GO:0050794; P:GO:0044767; P:GO:0006915; P:GO:0006508; F:GO:0004197	-	IPR015917 (PRINTS); IPR011600 (PFAM); G3DSA:3.40.50.1460 (GENE3D); PTHR10454 (PANTHER); IPR016129 (PROSITE_PATTERNS); IPR002138 (PROSITE_PROFILES); IPR001309 (PROSITE_PROFILES); SSF52129 (SUPERFAMILY)
Aqu2.1.26405_001	intraflagellar transport protein 172 homolog	1242	20	0	0.74	8	P:GO:0045494; C:GO:0005929; P:GO:0007399; P:GO:0042384; P:GO:0032006; P:GO:0048793; P:GO:0007389; F:GO:0005515	-	IPR011990 (G3DSA:1.25.40.GENE3D); PTHR15722:SF2 (PANTHER); PTHR15722 (PANTHER)
Aqu2.1.26426_001	sacsin- partial	1717	20	0	0.5515	3	F:GO:0016787; C:GO:0044424; F:GO:0005515	-	IPR002110 (SMART); PF05729 (PFAM); IPR011029 (G3DSA:1.10.533.GENE3D); G3DSA:3.80.10.10 (GENE3D); G3DSA:3.40.50.300 (GENE3D); IPR020683 (G3DSA:1.25.40.GENE3D); IPR020683 (PFAM); PTHR24106 (PANTHER); TRANSMEMBRANE (PHOBIUS); NON_CYTOPLASMIC_DOMAIN (PHOBIUS); CYTOPLASMIC_DOMAIN (PHOBIUS); NON_CYTOPLASMIC_DOMAIN (PHOBIUS); TRANSMEMBRANE (PHOBIUS); IPR007111 (PROSITE_PROFILES); IPR020683 (PROSITE_PROF…
Aqu2.1.26429_001	kdel motif-containing protein 1	356	20	4.94625e-46	0.5005	1	C:GO:0005788		IPR017868 (PFAM); IPR006598 (PFAM); IPR013783 (G3DSA:2.60.40.GENE3D); PTHR12203 (PANTHER); PTHR12203:SF5 (PANTHER); CYTOPLASMIC_DOMAIN (PHOBIUS); TRANSMEMBRANE (PHOBIUS); NON_CYTOPLASMIC_DOMAIN (PHOBIUS); SignalP-noTM (SIGNALP_EUK); IPR014756 (SUPERFAMILY)
Aqu2.1.26432_001	major facilitator superfamily domain-containing protein 2a-b-like	469	20	0	0.589	3	C:GO:0016021; C:GO:0016020; P:GO:0006810		PF13347 (PFAM); G3DSA:1.20.1250.20 (GENE3D); PTHR32425 (PANTHER); CYTOPLASMIC_DOMAIN (PHOBIUS); NON_CYTOPLASMIC_DOMAIN (PHOBIUS); TRANSMEMBRANE (PHOBIUS); CYTOPLASMIC_DOMAIN (PHOBIUS); TRANSMEMBRANE (PHOBIUS); TRANSMEMBRANE (PHOBIUS); TRANSMEMBRANE (PHOBIUS); TRANSMEMBRANE (PHOBIUS); CYTOPLASMIC_DOMAIN (PHOBIUS); NON_CYTOPLASMIC_DOMAIN (PHOBIUS); CYTOPLASMIC_DOMAIN (PHOBIUS); CYTOPLASMIC_DOMAIN (…
Aqu2.1.26435_001	multidrug resistance-associated protein 1-like	1431	20	0	0.6115	11	P:GO:0006767; P:GO:0033559; C:GO:0005794; C:GO:0005730; P:GO:0006690; P:GO:0006200; C:GO:0005886; P:GO:0055085; F:GO:0042626; C:GO:0016021; F:GO:0005524	EC:3.6.1.3	IPR003593 (SMART); G3DSA:1.20.1560.10 (GENE3D); IPR001140 (PFAM); G3DSA:3.40.50.300 (GENE3D); IPR003439 (PFAM); PTHR24223 (PANTHER); PTHR24223:SF61 (PANTHER); IPR017871 (PROSITE_PATTERNS); CYTOPLASMIC_DOMAIN (PHOBIUS); TRANSMEMBRANE (PHOBIUS); NON_CYTOPLASMIC_DOMAIN (PHOBIUS); NON_CYTOPLASMIC_DOMAIN (PHOBIUS); TRANSMEMBRANE (PHOBIUS); TRANSMEMBRANE (PHOBIUS); TRANSMEMBRANE (PHOBIUS); TRANSMEMBRAN…
Aqu2.1.26445_001	---NA---	277	0			2	F:GO:0005524; F:GO:0016772		G3DSA:3.30.200.20 (GENE3D); IPR017441 (PROSITE_PATTERNS); IPR011009 (SUPERFAMILY)
Aqu2.1.26474_001	PREDICTED: hypothetical protein LOC100640756 [Amphimedon queenslandica]	131	20	1.66567e-74	0.5695	0	-		no IPS match
Aqu2.1.26482_001	protein let- isoform a	979	20	1.16627e-98	0.5935	2	P:GO:0007275; F:GO:0005515	-	IPR003961 (SMART); IPR013783 (G3DSA:2.60.40.GENE3D); IPR013783 (G3DSA:2.60.40.GENE3D); IPR013783 (G3DSA:2.60.40.GENE3D); IPR013783 (G3DSA:2.60.40.GENE3D); IPR003961 (PFAM); PTHR10489 (PANTHER); NON_CYTOPLASMIC_DOMAIN (PHOBIUS); CYTOPLASMIC_DOMAIN (PHOBIUS); TRANSMEMBRANE (PHOBIUS); IPR003961 (PROSITE_PROFILES); IPR003961 (PROSITE_PROFILES); IPR003961 (PROSITE_PROFILES); IPR003961 (PROSITE_PROFILE…
Aqu2.1.26491_001	oligopeptide transporter	631	20	0	0.5135	3	C:GO:0016021; P:GO:0006857; F:GO:0005215	-	IPR000109 (PFAM); IPR000109 (PANTHER); PTHR11654:SF14 (PANTHER); TRANSMEMBRANE (PHOBIUS); CYTOPLASMIC_DOMAIN (PHOBIUS); NON_CYTOPLASMIC_DOMAIN (PHOBIUS); NON_CYTOPLASMIC_DOMAIN (PHOBIUS); TRANSMEMBRANE (PHOBIUS); TRANSMEMBRANE (PHOBIUS); TRANSMEMBRANE (PHOBIUS); TRANSMEMBRANE (PHOBIUS); NON_CYTOPLASMIC_DOMAIN (PHOBIUS); CYTOPLASMIC_DOMAIN (PHOBIUS); CYTOPLASMIC_DOMAIN (PHOBIUS); CYTOPLASMIC_DOMAI…
Aqu2.1.26492_001	maguk p55 subfamily member 6	560	20	0	0.6125	2	C:GO:0005886; F:GO:0030165	-	Coil (COILS); IPR008145 (SMART); IPR001478 (SMART); IPR004172 (SMART); IPR001452 (SMART); IPR014775 (PFAM); G3DSA:3.30.63.10 (GENE3D); G3DSA:3.40.50.300 (GENE3D); G3DSA:2.30.42.10 (GENE3D); IPR001478 (PFAM); G3DSA:2.30.30.40 (GENE3D); IPR008145 (PFAM); IPR011511 (PFAM); PTHR23122 (PANTHER); IPR008144 (PROSITE_PROFILES); IPR001452 (PROSITE_PROFILES); IPR001478 (PROSITE_PROFILES); IPR001478 (SUPERF…
Aqu2.1.26493_001	maguk p55 subfamily member 6-like isoform x1	550	20	1.06369e-82	0.508	19	P:GO:0042127; F:GO:0005515; P:GO:0007275; P:GO:0006357; P:GO:0045892; P:GO:0048856; F:GO:0003677; P:GO:0022402; P:GO:0009966; P:GO:0080135; F:GO:0003700; P:GO:0044767; P:GO:0045893; C:GO:0005886; C:GO:0005634; P:GO:0035556; P:GO:0006281; C:GO:0005667; P:GO:0045449	-	Coil (COILS); IPR008145 (SMART); IPR004172 (SMART); IPR001452 (SMART); IPR001478 (SMART); G3DSA:3.30.63.10 (GENE3D); G3DSA:2.30.30.40 (GENE3D); IPR001452 (PFAM); G3DSA:1.10.287.650 (GENE3D); IPR001478 (PFAM); IPR008145 (PFAM); G3DSA:2.30.42.10 (GENE3D); G3DSA:3.40.50.300 (GENE3D); PTHR23122 (PANTHER); IPR020590 (PROSITE_PATTERNS); IPR001452 (PROSITE_PROFILES); IPR008144 (PROSITE_PROFILES); IPR001…
Aqu2.1.26512_001	lrr and pyd domains-containing protein 3-like	1457	20	0	0.4905	6	P:GO:0044237; F:GO:0016787; C:GO:0044424; P:GO:0007165; P:GO:0048523; P:GO:0019538	-	Coil (COILS); G3DSA:3.40.50.300 (GENE3D); G3DSA:3.40.50.300 (GENE3D); PF05729 (PFAM); PTHR24106:SF0 (PANTHER); PTHR24106 (PANTHER); TRANSMEMBRANE (PHOBIUS); CYTOPLASMIC_DOMAIN (PHOBIUS); NON_CYTOPLASMIC_DOMAIN (PHOBIUS); TRANSMEMBRANE (PHOBIUS); NON_CYTOPLASMIC_DOMAIN (PHOBIUS); CYTOPLASMIC_DOMAIN (PHOBIUS); TRANSMEMBRANE (PHOBIUS); NON_CYTOPLASMIC_DOMAIN (PHOBIUS); TRANSMEMBRANE (PHOBIUS); IPR00…
Aqu2.1.26513_001	glutaminase	162	20	1.53278e-43	0.6195	2	P:GO:0008152; F:GO:0003824		IPR014870 (PFAM); PTHR31987 (PANTHER)
Aqu2.1.26514_001	serine threonine-protein kinase vrk1 isoform x3	82	20	3.78649e-17	0.687	9	P:GO:0046777; P:GO:0006996; F:GO:0004674; C:GO:0043232; F:GO:0005524; C:GO:0044446; C:GO:0005737; C:GO:0005634; P:GO:0009069	EC:2.7.11.0	no IPS match
Aqu2.1.26523_001	dyt3 protein	169	19	7.40528e-72	0.610526	23	F:GO:0002039; P:GO:0006367; F:GO:0008270; F:GO:0004402; P:GO:0018107; C:GO:0005730; P:GO:0046777; F:GO:0003676; P:GO:0032436; P:GO:0018105; F:GO:0004674; F:GO:0003713; F:GO:0017025; C:GO:0005669; P:GO:0045944; P:GO:0016032; F:GO:0070577; P:GO:0016573; C:GO:0071339; C:GO:0000123; P:GO:0042967; P:GO:0009069; P:GO:0045941	EC:2.3.1.48; EC:2.7.11.0	IPR001487 (G3DSA:1.20.920.GENE3D); IPR001487 (PFAM); PTHR13900 (PANTHER); PTHR13900:SF0 (PANTHER); IPR001487 (PROSITE_PROFILES); IPR001487 (SUPERFAMILY)
Aqu2.1.26551_001	gamma-aminobutyric acid type b receptor subunit 2-like	503	20	1.99911e-122	0.567	3	C:GO:0016021; P:GO:0007186; F:GO:0004965	-	Coil (COILS); IPR002455 (PRINTS); IPR000337 (PRINTS); G3DSA:3.40.50.2300 (GENE3D); G3DSA:3.40.50.2300 (GENE3D); IPR001828 (PFAM); PTHR10519 (PANTHER); NON_CYTOPLASMIC_DOMAIN (PHOBIUS); SIGNAL_PEPTIDE_H_REGION (PHOBIUS); TRANSMEMBRANE (PHOBIUS); SIGNAL_PEPTIDE_N_REGION (PHOBIUS); SIGNAL_PEPTIDE_C_REGION (PHOBIUS); TRANSMEMBRANE (PHOBIUS); CYTOPLASMIC_DOMAIN (PHOBIUS); SIGNAL_PEPTIDE (PHOBIUS); NON…
Aqu2.1.26552_001	---NA---	24	0			0	-		no IPS match
Aqu2.1.26564_001	---NA---	400	0			0	-		SIGNAL_PEPTIDE_N_REGION (PHOBIUS); NON_CYTOPLASMIC_DOMAIN (PHOBIUS); SIGNAL_PEPTIDE_C_REGION (PHOBIUS); SIGNAL_PEPTIDE (PHOBIUS); SIGNAL_PEPTIDE_H_REGION (PHOBIUS); SignalP-noTM (SIGNALP_EUK)
Aqu2.1.26575_001	dep domain-containing mtor-interacting	280	20	1.12612e-21	0.6705	4	P:GO:0035556; P:GO:0055114; P:GO:0006979; F:GO:0004602		IPR000591 (SMART); IPR012336 (G3DSA:3.40.30.GENE3D); IPR000591 (PFAM); IPR000889 (PFAM); IPR011993 (G3DSA:2.30.29.GENE3D); IPR011991 (G3DSA:1.10.10.GENE3D); PTHR22829 (PANTHER); PTHR22829:SF4 (PANTHER); IPR000591 (PROSITE_PROFILES); IPR000889 (PROSITE_PROFILES); SSF50729 (SUPERFAMILY); IPR012336 (SUPERFAMILY); SSF46785 (SUPERFAMILY)
Aqu2.1.26583_001	receptor-type tyrosine-protein phosphatase eta	854	4	4.24299e-13	0.455	1	F:GO:0005515		IPR003961 (SMART); IPR013783 (G3DSA:2.60.40.GENE3D); IPR013783 (G3DSA:2.60.40.GENE3D); IPR013783 (G3DSA:2.60.40.GENE3D); SIGNAL_PEPTIDE_N_REGION (PHOBIUS); SIGNAL_PEPTIDE (PHOBIUS); NON_CYTOPLASMIC_DOMAIN (PHOBIUS); SIGNAL_PEPTIDE_H_REGION (PHOBIUS); SIGNAL_PEPTIDE_C_REGION (PHOBIUS); IPR003961 (PROSITE_PROFILES); IPR003961 (PROSITE_PROFILES); IPR003961 (PROSITE_PROFILES); IPR003961 (PROSITE_PROF…
Aqu2.1.26584_001	---NA---	80	0			0	-		TRANSMEMBRANE (PHOBIUS); NON_CYTOPLASMIC_DOMAIN (PHOBIUS); CYTOPLASMIC_DOMAIN (PHOBIUS); TMhelix (TMHMM)
Aqu2.1.26586_001	PREDICTED: hypothetical protein LOC100639235 [Amphimedon queenslandica]	387	2	6.95794e-26	0.585	1	F:GO:0005515		IPR003961 (SMART); IPR013783 (G3DSA:2.60.40.GENE3D); IPR013783 (G3DSA:2.60.40.GENE3D); NON_CYTOPLASMIC_DOMAIN (PHOBIUS); TRANSMEMBRANE (PHOBIUS); CYTOPLASMIC_DOMAIN (PHOBIUS); IPR003961 (PROSITE_PROFILES); IPR003961 (PROSITE_PROFILES); IPR003961 (SUPERFAMILY)
Aqu2.1.26605_001	phosphate carrier mitochondrial-like	51	20	1.38404e-24	0.747	3	P:GO:0006259; P:GO:0006810; C:GO:0016021	-	IPR023395 (SUPERFAMILY)
Aqu2.1.26613_001	armadillo repeat-containing protein 8 isoform x1	652	20	0	0.5165	1	F:GO:0005515		IPR000225 (SMART); IPR000225 (PFAM); IPR011989 (G3DSA:1.25.10.GENE3D); PTHR15651 (PANTHER); IPR016024 (SUPERFAMILY)
Aqu2.1.26623_001	zinc phosphodiesterase elac protein 1-like	369	20	2.45375e-125	0.635	2	F:GO:0016891; P:GO:0042779		Coil (COILS); PF12706 (PFAM); IPR001279 (G3DSA:3.60.15.GENE3D); PTHR12553 (PANTHER); NON_CYTOPLASMIC_DOMAIN (PHOBIUS); SIGNAL_PEPTIDE (PHOBIUS); SIGNAL_PEPTIDE_H_REGION (PHOBIUS); SIGNAL_PEPTIDE_C_REGION (PHOBIUS); SIGNAL_PEPTIDE_N_REGION (PHOBIUS); IPR013471 (HAMAP); SignalP-noTM (SIGNALP_EUK); SSF56281 (SUPERFAMILY)
Aqu2.1.26624_001	x-ray radiation resistance-associated protein 1	745	20	0	0.4695	1	F:GO:0005515		IPR003591 (SMART); IPR025875 (PFAM); G3DSA:3.80.10.10 (GENE3D); PF13516 (PFAM); PTHR22710 (PANTHER); IPR001611 (PROSITE_PROFILES); IPR001611 (PROSITE_PROFILES); IPR001611 (PROSITE_PROFILES); IPR001611 (PROSITE_PROFILES); IPR001611 (PROSITE_PROFILES); IPR001611 (PROSITE_PROFILES); IPR001611 (PROSITE_PROFILES); SSF52058 (SUPERFAMILY)
Aqu2.1.26630_001	dep domain-containing mtor-interacting	491	20	0	0.5805	2	P:GO:0035556; F:GO:0005515	-	IPR001478 (SMART); IPR000591 (SMART); IPR011991 (G3DSA:1.10.10.GENE3D); IPR001478 (PFAM); IPR000591 (PFAM); G3DSA:2.30.42.10 (GENE3D); PTHR22829:SF4 (PANTHER); PTHR22829 (PANTHER); IPR001478 (PROSITE_PROFILES); IPR000591 (PROSITE_PROFILES); SSF46785 (SUPERFAMILY); IPR001478 (SUPERFAMILY)
Aqu2.1.26651_001	vwfa and cache domain-containing protein 1	1076	20	0	0.4125	0	-		SIGNAL_PEPTIDE_N_REGION (PHOBIUS); SIGNAL_PEPTIDE_H_REGION (PHOBIUS); TRANSMEMBRANE (PHOBIUS); CYTOPLASMIC_DOMAIN (PHOBIUS); SIGNAL_PEPTIDE_C_REGION (PHOBIUS); NON_CYTOPLASMIC_DOMAIN (PHOBIUS); SIGNAL_PEPTIDE (PHOBIUS); SignalP-TM (SIGNALP_GRAM_POSITIVE); SignalP-noTM (SIGNALP_GRAM_NEGATIVE); SignalP-noTM (SIGNALP_EUK); TMhelix (TMHMM)
Aqu2.1.26670_001	tripartite motif-containing protein 71-like	202	20	1.56737e-83	0.675	1	F:GO:0005515		IPR001258 (PFAM); IPR011042 (G3DSA:2.120.10.GENE3D); PTHR24103 (PANTHER); PTHR24103:SF208 (PANTHER); IPR013017 (PROSITE_PROFILES); IPR013017 (PROSITE_PROFILES); IPR013017 (PROSITE_PROFILES); IPR013017 (PROSITE_PROFILES); SSF101898 (SUPERFAMILY)
Aqu2.1.26685_001	solute carrier family 35 member e1	331	20	0	0.68	1	C:GO:0016021	-	IPR004853 (PFAM); IPR000620 (PFAM); PTHR11132:SF14 (PANTHER); PTHR11132 (PANTHER); NON_CYTOPLASMIC_DOMAIN (PHOBIUS); TRANSMEMBRANE (PHOBIUS); TRANSMEMBRANE (PHOBIUS); SIGNAL_PEPTIDE_C_REGION (PHOBIUS); TRANSMEMBRANE (PHOBIUS); TRANSMEMBRANE (PHOBIUS); NON_CYTOPLASMIC_DOMAIN (PHOBIUS); CYTOPLASMIC_DOMAIN (PHOBIUS); NON_CYTOPLASMIC_DOMAIN (PHOBIUS); CYTOPLASMIC_DOMAIN (PHOBIUS); CYTOPLASMIC_DOMAIN …
Aqu2.1.26738_001	protein let- isoform b	285	20	2.69883e-80	0.4725	1	F:GO:0005515		IPR003961 (SMART); IPR003961 (PFAM); IPR013783 (G3DSA:2.60.40.GENE3D); IPR013783 (G3DSA:2.60.40.GENE3D); PTHR10489 (PANTHER); TRANSMEMBRANE (PHOBIUS); NON_CYTOPLASMIC_DOMAIN (PHOBIUS); CYTOPLASMIC_DOMAIN (PHOBIUS); IPR003961 (PROSITE_PROFILES); IPR003961 (PROSITE_PROFILES); IPR003961 (SUPERFAMILY); TMhelix (TMHMM)
Aqu2.1.26749_001	kelch domain-containing protein 4-like	874	20	2.9992e-169	0.591	2	F:GO:0016772; F:GO:0005515	-	Coil (COILS); Coil (COILS); IPR015915 (G3DSA:2.120.10.GENE3D); PTHR23244 (PANTHER); SSF117281 (SUPERFAMILY); SSF117281 (SUPERFAMILY)
Aqu2.1.26750_001	protein	668	10	2.05573e-69	0.45	0	-		CYTOPLASMIC_DOMAIN (PHOBIUS); CYTOPLASMIC_DOMAIN (PHOBIUS); NON_CYTOPLASMIC_DOMAIN (PHOBIUS); TRANSMEMBRANE (PHOBIUS); TRANSMEMBRANE (PHOBIUS); TRANSMEMBRANE (PHOBIUS); TRANSMEMBRANE (PHOBIUS); NON_CYTOPLASMIC_DOMAIN (PHOBIUS); CYTOPLASMIC_DOMAIN (PHOBIUS); NON_CYTOPLASMIC_DOMAIN (PHOBIUS); CYTOPLASMIC_DOMAIN (PHOBIUS); TRANSMEMBRANE (PHOBIUS); CYTOPLASMIC_DOMAIN (PHOBIUS); TRANSMEMBRANE (PHOBIUS…
Aqu2.1.26758_001	transcription initiation factor tfiid subunit 2	861	20	0	0.62	2	F:GO:0008270; F:GO:0008237		IPR011989 (G3DSA:1.25.10.GENE3D); IPR014782 (PFAM); G3DSA:1.10.390.10 (GENE3D); PTHR15137:SF9 (PANTHER); PTHR15137 (PANTHER); SIGNAL_PEPTIDE_C_REGION (PHOBIUS); SIGNAL_PEPTIDE_N_REGION (PHOBIUS); SIGNAL_PEPTIDE_H_REGION (PHOBIUS); SIGNAL_PEPTIDE (PHOBIUS); NON_CYTOPLASMIC_DOMAIN (PHOBIUS); SignalP-noTM (SIGNALP_EUK); SSF63737 (SUPERFAMILY); SSF55486 (SUPERFAMILY)
Aqu2.1.26794_001	sodium leak channel non-selective protein	1809	20	3.9463e-159	0.472	4	P:GO:0055085; P:GO:0006811; C:GO:0016020; F:GO:0005261		Coil (COILS); IPR005821 (PFAM); PTHR10037 (PANTHER); IPR028823 (PTHR10037:PANTHER); TRANSMEMBRANE (PHOBIUS); TRANSMEMBRANE (PHOBIUS); TRANSMEMBRANE (PHOBIUS); TRANSMEMBRANE (PHOBIUS); TRANSMEMBRANE (PHOBIUS); NON_CYTOPLASMIC_DOMAIN (PHOBIUS); NON_CYTOPLASMIC_DOMAIN (PHOBIUS); TRANSMEMBRANE (PHOBIUS); TRANSMEMBRANE (PHOBIUS); TRANSMEMBRANE (PHOBIUS); NON_CYTOPLASMIC_DOMAIN (PHOBIUS); NON_CYTOPLASM…
Aqu2.1.26795_001	peptidase m35	356	20	9.96672e-62	0.4845	1	F:GO:0008237		PF14521 (PFAM); IPR024079 (G3DSA:3.40.390.GENE3D); NON_CYTOPLASMIC_DOMAIN (PHOBIUS); SIGNAL_PEPTIDE_N_REGION (PHOBIUS); SIGNAL_PEPTIDE_C_REGION (PHOBIUS); SIGNAL_PEPTIDE (PHOBIUS); SIGNAL_PEPTIDE_H_REGION (PHOBIUS); SignalP-noTM (SIGNALP_EUK); SignalP-TM (SIGNALP_GRAM_POSITIVE); SignalP-noTM (SIGNALP_GRAM_NEGATIVE); SSF55486 (SUPERFAMILY)
Aqu2.1.26862_001	PREDICTED: hypothetical protein LOC100640093 [Amphimedon queenslandica]	168	1	6.2065e-55	0.79	3	F:GO:0005044; C:GO:0016020; P:GO:0007165	-	no IPS match
Aqu2.1.26906_001	PREDICTED: hypothetical protein LOC100639045, partial [Amphimedon queenslandica]	570	5	1.61711e-67	0.554	1	F:GO:0005515		IPR003961 (SMART); IPR013783 (G3DSA:2.60.40.GENE3D); SIGNAL_PEPTIDE_H_REGION (PHOBIUS); SIGNAL_PEPTIDE_N_REGION (PHOBIUS); SIGNAL_PEPTIDE (PHOBIUS); TRANSMEMBRANE (PHOBIUS); SIGNAL_PEPTIDE_C_REGION (PHOBIUS); NON_CYTOPLASMIC_DOMAIN (PHOBIUS); CYTOPLASMIC_DOMAIN (PHOBIUS); IPR003961 (PROSITE_PROFILES); IPR003961 (PROSITE_PROFILES); SignalP-noTM (SIGNALP_GRAM_NEGATIVE); SignalP-TM (SIGNALP_GRAM_POS…
Aqu2.1.26912_001	sorbitol dehydrogenase-like	484	20	0	0.816	5	F:GO:0008270; F:GO:0003939; P:GO:0055114; P:GO:0006000; P:GO:0006013	EC:1.1.1.14	IPR013149 (PFAM); IPR011032 (G3DSA:3.90.180.GENE3D); IPR013154 (PFAM); IPR016040 (G3DSA:3.40.50.GENE3D); IPR002085 (PANTHER); PTHR11695:SF38 (PANTHER); IPR011032 (SUPERFAMILY); SSF51735 (SUPERFAMILY)
Aqu2.1.26915_001	sentrin sumo-specific	866	20	3.29769e-35	0.505	5	P:GO:0048667; P:GO:0048812; C:GO:0044424; P:GO:0006508; F:GO:0008234	-	G3DSA:3.30.310.130 (GENE3D); IPR003653 (PFAM); PTHR12438:SF7 (PANTHER); PTHR12438 (PANTHER); IPR003653 (PROSITE_PROFILES); SSF54001 (SUPERFAMILY)
Aqu2.1.26926_001	inositol -trisphosphate receptor type 3-like	2290	20	1.01037e-83	0.443	1	C:GO:0016020		G3DSA:2.80.10.50 (GENE3D); G3DSA:2.80.10.50 (GENE3D); IPR014821 (PFAM); TRANSMEMBRANE (PHOBIUS); CYTOPLASMIC_DOMAIN (PHOBIUS); NON_CYTOPLASMIC_DOMAIN (PHOBIUS); CYTOPLASMIC_DOMAIN (PHOBIUS); TRANSMEMBRANE (PHOBIUS); NON_CYTOPLASMIC_DOMAIN (PHOBIUS); TRANSMEMBRANE (PHOBIUS); NON_CYTOPLASMIC_DOMAIN (PHOBIUS); NON_CYTOPLASMIC_DOMAIN (PHOBIUS); TRANSMEMBRANE (PHOBIUS); TRANSMEMBRANE (PHOBIUS); CYTOPL…
Aqu2.1.26945_001	hemicentin-1	1078	20	3.05343e-62	0.4075	1	F:GO:0005515		IPR003598 (SMART); IPR003599 (SMART); IPR013783 (G3DSA:2.60.40.GENE3D); PF13895 (PFAM); IPR013783 (G3DSA:2.60.40.GENE3D); IPR013783 (G3DSA:2.60.40.GENE3D); IPR013098 (PFAM); IPR013783 (G3DSA:2.60.40.GENE3D); PTHR10489 (PANTHER); TRANSMEMBRANE (PHOBIUS); CYTOPLASMIC_DOMAIN (PHOBIUS); TRANSMEMBRANE (PHOBIUS); SIGNAL_PEPTIDE_H_REGION (PHOBIUS); NON_CYTOPLASMIC_DOMAIN (PHOBIUS); TRANSMEMBRANE (PHOBIU…
Aqu2.1.26951_001	alsin isoform 1	895	20	0	0.5265	14	C:GO:0043005; P:GO:0043085; P:GO:0044260; P:GO:0016043; P:GO:0046578; C:GO:0005737; F:GO:0005088; F:GO:0005515; P:GO:0048522; C:GO:0043229; P:GO:0007275; P:GO:0044767; P:GO:0048856; P:GO:0043087	-	Coil (COILS); IPR003409 (SMART); IPR003409 (PFAM); G3DSA:2.20.110.10 (GENE3D); IPR003123 (PFAM); PTHR23084 (PANTHER); PTHR23084:SF11 (PANTHER); IPR003123 (PROSITE_PROFILES); SSF109993 (SUPERFAMILY); SSF82185 (SUPERFAMILY); SSF82185 (SUPERFAMILY)
Aqu2.1.26954_001	vacuolar protein-sorting-associated protein 25-like	190	20	2.212e-140	0.737	1	P:GO:0006810	-	IPR011991 (G3DSA:1.10.10.GENE3D); IPR008570 (PFAM); IPR014041 (G3DSA:1.10.10.GENE3D); IPR008570 (PANTHER); PTHR13149:SF0 (PANTHER); SSF46785 (SUPERFAMILY)
Aqu2.1.26964_001	SP4	629	20	0	0.745	2	F:GO:0003676; F:GO:0046872	-	IPR015880 (SMART); IPR013087 (G3DSA:3.30.160.GENE3D); PF13465 (PFAM); PTHR23235 (PANTHER); IPR007087 (PROSITE_PATTERNS); IPR007087 (PROSITE_PROFILES); SSF57667 (SUPERFAMILY)
Aqu2.1.26965_001	obg-like atpase 1	434	20	0	0.8615	1	F:GO:0005525	-	IPR006073 (PRINTS); IPR004396 (TIGRFAM); G3DSA:3.40.50.300 (GENE3D); IPR012675 (G3DSA:3.10.20.GENE3D); IPR006073 (PFAM); IPR013029 (PFAM); IPR023192 (G3DSA:1.10.150.GENE3D); PTHR23305:SF3 (PANTHER); PTHR23305 (PANTHER); IPR004396 (HAMAP); IPR012676 (SUPERFAMILY); IPR027417 (SUPERFAMILY)
Aqu2.1.26966_001	dynein heavy chain axonemal	808	20	0	0.5735	5	F:GO:0016887; P:GO:0001539; C:GO:0005858; F:GO:0003777; P:GO:0007018		Coil (COILS); IPR013602 (PFAM); IPR026979 (PTHR10676:PANTHER); IPR026983 (PANTHER)
Aqu2.1.26967_001	dynein heavy chain axonemal	3108	20	0	0.8615	10	F:GO:0003777; C:GO:0005858; F:GO:0005509; P:GO:0006200; F:GO:0005524; C:GO:0005929; P:GO:0007018; P:GO:0001539; F:GO:0016887; C:GO:0005874	EC:3.6.1.3	Coil (COILS); IPR024743 (PFAM); IPR013602 (PFAM); IPR024317 (PFAM); PF12775 (PFAM); G3DSA:3.40.50.300 (GENE3D); IPR004273 (PFAM); PF12774 (PFAM); PF12781 (PFAM); IPR026983 (PANTHER); IPR026979 (PTHR10676:PANTHER); IPR018247 (PROSITE_PATTERNS); IPR002048 (PROSITE_PROFILES); IPR027417 (SUPERFAMILY); IPR027417 (SUPERFAMILY); IPR027417 (SUPERFAMILY); IPR027417 (SUPERFAMILY)
Aqu2.1.26985_001	sodium hydrogen exchanger 1	721	20	0	0.5945	6	F:GO:0015385; P:GO:0055085; P:GO:0006885; C:GO:0016021; P:GO:0006814; P:GO:0015992	-	IPR004709 (PRINTS); IPR004709 (TIGRFAM); IPR006153 (PFAM); PTHR10110:SF20 (PANTHER); IPR018422 (PANTHER); TRANSMEMBRANE (PHOBIUS); TRANSMEMBRANE (PHOBIUS); TRANSMEMBRANE (PHOBIUS); CYTOPLASMIC_DOMAIN (PHOBIUS); NON_CYTOPLASMIC_DOMAIN (PHOBIUS); TRANSMEMBRANE (PHOBIUS); TRANSMEMBRANE (PHOBIUS); TRANSMEMBRANE (PHOBIUS); NON_CYTOPLASMIC_DOMAIN (PHOBIUS); CYTOPLASMIC_DOMAIN (PHOBIUS); NON_CYTOPLASMIC…
Aqu2.1.27032_001	nadph-dependent diflavin oxidoreductase 1- partial	1139	5	7.38074e-17	0.442	2	P:GO:0055114; F:GO:0016491		CYTOPLASMIC_DOMAIN (PHOBIUS); CYTOPLASMIC_DOMAIN (PHOBIUS); NON_CYTOPLASMIC_DOMAIN (PHOBIUS); TRANSMEMBRANE (PHOBIUS); TRANSMEMBRANE (PHOBIUS); NON_CYTOPLASMIC_DOMAIN (PHOBIUS); TRANSMEMBRANE (PHOBIUS); NON_CYTOPLASMIC_DOMAIN (PHOBIUS); TRANSMEMBRANE (PHOBIUS); CYTOPLASMIC_DOMAIN (PHOBIUS); NON_CYTOPLASMIC_DOMAIN (PHOBIUS); CYTOPLASMIC_DOMAIN (PHOBIUS); NON_CYTOPLASMIC_DOMAIN (PHOBIUS); TRANSMEMB…
Aqu2.1.27081_001	rho gtpase activator	102	20	1.64644e-27	0.6525	3	F:GO:0005515; P:GO:0007165; C:GO:0005622		IPR015943 (G3DSA:2.130.10.GENE3D); IPR000198 (G3DSA:1.10.555.GENE3D); IPR000198 (PFAM); IPR000198 (PROSITE_PROFILES); IPR008936 (SUPERFAMILY)
Aqu2.1.27094_001	ecto-nox disulfide-thiol exchanger 2 isoform x1	611	20	0	0.489	2	F:GO:0003676; F:GO:0000166	-	Coil (COILS); Coil (COILS); IPR000504 (SMART); IPR012677 (G3DSA:3.30.70.GENE3D); IPR000504 (PFAM); PTHR16001:SF4 (PANTHER); PTHR16001 (PANTHER); IPR000504 (PROSITE_PROFILES); SSF54928 (SUPERFAMILY)
Aqu2.1.27097_001	histidine--trna cytoplasmic-like	86	20	2.28463e-09	0.649	6	C:GO:0005737; F:GO:0005524; F:GO:0004812; F:GO:0004821; P:GO:0006418; P:GO:0006427		G3DSA:3.30.930.10 (GENE3D)
Aqu2.1.27104_001	uncharacterized protein c9orf84 homolog	577	20	8.09619e-17	0.417	0	-		no IPS match
Aqu2.1.27108_001	---NA---	566	0			0	-		no IPS match
Aqu2.1.27110_001	tripartite motif-containing protein 71-like	746	20	1.86394e-175	0.651	3	F:GO:0008270; F:GO:0005515; C:GO:0005622		Coil (COILS); Coil (COILS); IPR001841 (SMART); IPR000315 (SMART); IPR003649 (SMART); IPR000315 (PFAM); IPR011042 (G3DSA:2.120.10.GENE3D); IPR000315 (G3DSA:4.10.45.GENE3D); IPR001841 (PFAM); IPR013083 (G3DSA:3.30.40.GENE3D); IPR001258 (PFAM); PTHR24103:SF134 (PANTHER); PTHR24103 (PANTHER); IPR017907 (PROSITE_PATTERNS); IPR013017 (PROSITE_PROFILES); IPR000315 (PROSITE_PROFILES); IPR013017 (PROSITE_…
Aqu2.1.27129_001	trafficking protein particle complex subunit 5	207	20	9.30149e-123	0.729	0	-		IPR016696 (PIRSF); IPR007194 (PFAM); G3DSA:3.30.1380.20 (GENE3D); PTHR20902:SF0 (PANTHER); IPR016696 (PANTHER); IPR024096 (SUPERFAMILY)
Aqu2.1.27151_001	probable g-protein coupled receptor 112-like	2003	20	0	0.492	6	F:GO:0005509; P:GO:0007218; F:GO:0004930; C:GO:0016021; F:GO:0005515; F:GO:0003993	-	IPR003599 (SMART); IPR001881 (SMART); IPR003598 (SMART); IPR000203 (SMART); IPR001879 (PFAM); G3DSA:2.10.25.10 (GENE3D); IPR013783 (G3DSA:2.60.40.GENE3D); IPR013783 (G3DSA:2.60.40.GENE3D); IPR013783 (G3DSA:2.60.40.GENE3D); IPR000832 (PFAM); IPR000203 (PFAM); PF13927 (PFAM); IPR013098 (PFAM); IPR013783 (G3DSA:2.60.40.GENE3D); PTHR12011 (PANTHER); IPR013032 (PROSITE_PATTERNS); IPR013032 (PROSITE_PA…
Aqu2.1.27173_001	deleted in malignant brain tumors 1	385	20	6.27707e-39	0.415	2	C:GO:0016020; F:GO:0005044		G3DSA:3.10.250.10 (GENE3D); IPR001190 (PFAM); SIGNAL_PEPTIDE_N_REGION (PHOBIUS); SIGNAL_PEPTIDE_C_REGION (PHOBIUS); NON_CYTOPLASMIC_DOMAIN (PHOBIUS); SIGNAL_PEPTIDE_H_REGION (PHOBIUS); SIGNAL_PEPTIDE (PHOBIUS); IPR001190 (PROSITE_PROFILES); SignalP-TM (SIGNALP_GRAM_POSITIVE); SignalP-noTM (SIGNALP_GRAM_NEGATIVE); SignalP-noTM (SIGNALP_EUK); IPR017448 (SUPERFAMILY); TMhelix (TMHMM)
Aqu2.1.27176_001	neurofibromin isoform x2	2749	20	0	0.5725	22	P:GO:0045685; P:GO:0050890; P:GO:0050768; P:GO:0061351; P:GO:0043409; P:GO:0045765; P:GO:0021782; P:GO:0030336; P:GO:0016043; P:GO:0030900; P:GO:0019226; C:GO:0030424; P:GO:0043535; P:GO:0032320; P:GO:0001937; F:GO:0005099; F:GO:0005515; P:GO:0048522; P:GO:0065008; C:GO:0030425; P:GO:0007422; C:GO:0005622	-	IPR001936 (SMART); IPR001936 (PFAM); IPR001936 (G3DSA:1.10.506.GENE3D); IPR001251 (PFAM); G3DSA:1.10.494.10 (GENE3D); PTHR10194 (PANTHER); IPR028553 (PTHR10194:PANTHER); IPR023152 (PROSITE_PATTERNS); IPR001936 (PROSITE_PROFILES); IPR001251 (PROSITE_PROFILES); IPR008936 (SUPERFAMILY)
Aqu2.1.27186_001	phytanoyl- dioxygenase domain-containing protein 1 isoform x1	288	20	0	0.6775	1	F:GO:0051213		G3DSA:2.60.120.620 (GENE3D); IPR008775 (PFAM); PTHR20883 (PANTHER); SSF51197 (SUPERFAMILY)
Aqu2.1.27194_001	elongation factor 2	348	20	1.14399e-60	0.51	3	F:GO:0004674; F:GO:0005524; P:GO:0006468	-	IPR004166 (SMART); IPR004166 (PFAM); PTHR14187 (PANTHER); CYTOPLASMIC_DOMAIN (PHOBIUS); TRANSMEMBRANE (PHOBIUS); NON_CYTOPLASMIC_DOMAIN (PHOBIUS); IPR004166 (PROSITE_PROFILES); IPR011009 (SUPERFAMILY); TMhelix (TMHMM)
Aqu2.1.27199_001	signal peptide peptidase-like 3	360	20	0	0.593	2	F:GO:0004190; C:GO:0016021	-	IPR006639 (SMART); IPR007369 (PFAM); IPR007369 (PANTHER); CYTOPLASMIC_DOMAIN (PHOBIUS); NON_CYTOPLASMIC_DOMAIN (PHOBIUS); TRANSMEMBRANE (PHOBIUS); TRANSMEMBRANE (PHOBIUS); TRANSMEMBRANE (PHOBIUS); CYTOPLASMIC_DOMAIN (PHOBIUS); TRANSMEMBRANE (PHOBIUS); TRANSMEMBRANE (PHOBIUS); NON_CYTOPLASMIC_DOMAIN (PHOBIUS); CYTOPLASMIC_DOMAIN (PHOBIUS); CYTOPLASMIC_DOMAIN (PHOBIUS); NON_CYTOPLASMIC_DOMAIN (PHOB…
Aqu2.1.27220_001	uncharacterized protein loc100375776	513	20	3.8242e-18	0.4705	0	-		TRANSMEMBRANE (PHOBIUS); CYTOPLASMIC_DOMAIN (PHOBIUS); NON_CYTOPLASMIC_DOMAIN (PHOBIUS); NON_CYTOPLASMIC_DOMAIN (PHOBIUS); NON_CYTOPLASMIC_DOMAIN (PHOBIUS); TRANSMEMBRANE (PHOBIUS); TRANSMEMBRANE (PHOBIUS); TRANSMEMBRANE (PHOBIUS); CYTOPLASMIC_DOMAIN (PHOBIUS); TRANSMEMBRANE (PHOBIUS); TRANSMEMBRANE (PHOBIUS); NON_CYTOPLASMIC_DOMAIN (PHOBIUS); CYTOPLASMIC_DOMAIN (PHOBIUS); TRANSMEMBRANE (PHOBIUS)…
Aqu2.1.27236_001	e-selectin	342	20	0	0.5305	3	C:GO:0016020; F:GO:0005044; P:GO:0007165	-	IPR000436 (SMART); IPR013320 (G3DSA:2.60.120.GENE3D); G3DSA:2.10.70.10 (GENE3D); G3DSA:2.10.70.10 (GENE3D); IPR000436 (PFAM); IPR021023 (PFAM); PTHR19325 (PANTHER); CYTOPLASMIC_DOMAIN (PHOBIUS); NON_CYTOPLASMIC_DOMAIN (PHOBIUS); TRANSMEMBRANE (PHOBIUS); IPR000436 (PROSITE_PROFILES); IPR000436 (PROSITE_PROFILES); IPR000436 (PROSITE_PROFILES); IPR000436 (SUPERFAMILY); IPR000436 (SUPERFAMILY); IPR00…
Aqu2.1.27265_001	methylenetetrahydrofolate reductase	673	20	0	0.7615	4	P:GO:0006575; P:GO:0055114; F:GO:0004489; P:GO:0006555	-	IPR004621 (TIGRFAM); G3DSA:3.20.20.220 (GENE3D); IPR003171 (PFAM); PTHR21091:SF1 (PANTHER); PTHR21091 (PANTHER); SSF51730 (SUPERFAMILY)
Aqu2.1.27266_001	pentatricopeptide repeat-containing protein chloroplastic-like	46	7	8.15689e-06	0.67	0	-		IPR002885 (TIGRFAM); IPR002885 (PFAM)
Aqu2.1.27275_001	zinc transporter zip12-like	478	20	0	0.564	4	P:GO:0030001; C:GO:0016020; F:GO:0046873; P:GO:0055085	-	IPR003689 (PFAM); IPR021333 (PFAM); PTHR12191 (PANTHER); TRANSMEMBRANE (PHOBIUS); CYTOPLASMIC_DOMAIN (PHOBIUS); SIGNAL_PEPTIDE_N_REGION (PHOBIUS); NON_CYTOPLASMIC_DOMAIN (PHOBIUS); TRANSMEMBRANE (PHOBIUS); TRANSMEMBRANE (PHOBIUS); CYTOPLASMIC_DOMAIN (PHOBIUS); TRANSMEMBRANE (PHOBIUS); TRANSMEMBRANE (PHOBIUS); CYTOPLASMIC_DOMAIN (PHOBIUS); NON_CYTOPLASMIC_DOMAIN (PHOBIUS); NON_CYTOPLASMIC_DOMAIN (…
Aqu2.1.27303_001	myotubularin-related protein 5	1810	20	0	0.4945	2	P:GO:0016311; F:GO:0016791		IPR005113 (SMART); IPR001194 (SMART); IPR001194 (PFAM); IPR004182 (PFAM); IPR005113 (PFAM); IPR010569 (PFAM); IPR005112 (PFAM); IPR022096 (PFAM); PTHR10807 (PANTHER); PTHR10807:SF1 (PANTHER); NON_CYTOPLASMIC_DOMAIN (PHOBIUS); TRANSMEMBRANE (PHOBIUS); CYTOPLASMIC_DOMAIN (PHOBIUS); IPR005113 (PROSITE_PROFILES); IPR001194 (PROSITE_PROFILES); IPR017906 (PROSITE_PROFILES); IPR005112 (PROSITE_PROFILES)…
Aqu2.1.27304_001	myotubularin-related protein 5-like	392	20	0	0.424	1	P:GO:0035556		IPR002219 (SMART); IPR001849 (SMART); IPR001849 (PFAM); G3DSA:3.30.60.20 (GENE3D); IPR011993 (G3DSA:2.30.29.GENE3D); PTHR12092 (PANTHER); IPR002219 (PROSITE_PATTERNS); IPR001849 (PROSITE_PROFILES); IPR002219 (PROSITE_PROFILES); SSF50729 (SUPERFAMILY); SSF57889 (SUPERFAMILY)
Aqu2.1.27316_001	---NA---	79	0			0	-		no IPS match
Aqu2.1.27339_001	inner nuclear membrane protein man1	532	20	6.9724e-62	0.5065	2	F:GO:0000166; C:GO:0005639		IPR012677 (G3DSA:3.30.70.GENE3D); IPR018996 (PFAM); PTHR13428:SF4 (PANTHER); PTHR13428 (PANTHER); NON_CYTOPLASMIC_DOMAIN (PHOBIUS); TRANSMEMBRANE (PHOBIUS); TRANSMEMBRANE (PHOBIUS); CYTOPLASMIC_DOMAIN (PHOBIUS); NON_CYTOPLASMIC_DOMAIN (PHOBIUS); TRANSMEMBRANE (PHOBIUS); CYTOPLASMIC_DOMAIN (PHOBIUS); SSF54928 (SUPERFAMILY); TMhelix (TMHMM); TMhelix (TMHMM)
Aqu2.1.27349_001	low quality protein: zona pellucida sperm-binding protein 1	143	1	3.3789e-06	0.44	0	-		no IPS match
Aqu2.1.27351_001	arginine and glutamate-rich protein 1	257	20	3.55285e-163	0.7455	2	P:GO:0006351; F:GO:0005515	-	Coil (COILS); Coil (COILS); PF15346 (PFAM); PTHR31711 (PANTHER); SignalP-TM (SIGNALP_GRAM_POSITIVE)
Aqu2.1.27354_001	mannose-p-dolichol utilization defect 1 protein	237	20	1.51498e-146	0.621	0	-		IPR006603 (SMART); IPR016817 (PIRSF); PF04193 (PFAM); IPR016817 (PANTHER); TRANSMEMBRANE (PHOBIUS); NON_CYTOPLASMIC_DOMAIN (PHOBIUS); NON_CYTOPLASMIC_DOMAIN (PHOBIUS); CYTOPLASMIC_DOMAIN (PHOBIUS); TRANSMEMBRANE (PHOBIUS); TRANSMEMBRANE (PHOBIUS); CYTOPLASMIC_DOMAIN (PHOBIUS); CYTOPLASMIC_DOMAIN (PHOBIUS); NON_CYTOPLASMIC_DOMAIN (PHOBIUS); TRANSMEMBRANE (PHOBIUS); CYTOPLASMIC_DOMAIN (PHOBIUS); NO…
Aqu2.1.27362_001	leishmanolysin-like peptidase-like	710	20	0	0.548	6	F:GO:0004222; P:GO:0006508; P:GO:0007155; P:GO:0032501; P:GO:0007067; C:GO:0016020	EC:3.4.24.0	IPR001577 (PFAM); G3DSA:3.10.170.20 (GENE3D); G3DSA:3.90.132.10 (GENE3D); G3DSA:2.30.34.10 (GENE3D); G3DSA:2.10.55.10 (GENE3D); IPR001577 (PANTHER); PTHR10942:SF0 (PANTHER); CYTOPLASMIC_DOMAIN (PHOBIUS); SIGNAL_PEPTIDE_H_REGION (PHOBIUS); SIGNAL_PEPTIDE_N_REGION (PHOBIUS); SIGNAL_PEPTIDE_C_REGION (PHOBIUS); TRANSMEMBRANE (PHOBIUS); SIGNAL_PEPTIDE (PHOBIUS); NON_CYTOPLASMIC_DOMAIN (PHOBIUS); Signa…
Aqu2.1.27374_001	prolactin-releasing peptide receptor-like	310	20	5.61317e-68	0.502	3	F:GO:0004930; P:GO:0007186; C:GO:0016021	-	IPR000276 (PRINTS); G3DSA:1.20.1070.10 (GENE3D); IPR000276 (PFAM); PTHR24237 (PANTHER); TRANSMEMBRANE (PHOBIUS); TRANSMEMBRANE (PHOBIUS); TRANSMEMBRANE (PHOBIUS); CYTOPLASMIC_DOMAIN (PHOBIUS); CYTOPLASMIC_DOMAIN (PHOBIUS); TRANSMEMBRANE (PHOBIUS); CYTOPLASMIC_DOMAIN (PHOBIUS); TRANSMEMBRANE (PHOBIUS); NON_CYTOPLASMIC_DOMAIN (PHOBIUS); NON_CYTOPLASMIC_DOMAIN (PHOBIUS); CYTOPLASMIC_DOMAIN (PHOBIUS)…
Aqu2.1.27375_001	phenylalanine--trna ligase alpha subunit-like	61	20	4.24957e-30	0.934	8	P:GO:0006432; F:GO:0005524; F:GO:0004826; F:GO:0000049; P:GO:0000162; P:GO:0006571; P:GO:0009094; C:GO:0009328	EC:6.1.1.20	IPR002319 (PFAM); G3DSA:3.30.930.10 (GENE3D); PTHR11538 (PANTHER); PTHR11538:SF15 (PANTHER); IPR006195 (PROSITE_PROFILES); SSF55681 (SUPERFAMILY)
Aqu2.1.27377_001	phenylalanine--trna ligase alpha subunit-like	103	20	9.0157e-57	0.9185	8	P:GO:0006432; F:GO:0005524; F:GO:0004826; F:GO:0000049; P:GO:0000162; P:GO:0006571; P:GO:0009094; C:GO:0009328	EC:6.1.1.20	G3DSA:3.30.930.10 (GENE3D); IPR002319 (PFAM); PTHR11538 (PANTHER); PTHR11538:SF15 (PANTHER); IPR006195 (PROSITE_PROFILES); SSF55681 (SUPERFAMILY)
Aqu2.1.27378_001	receptor-type tyrosine-protein phosphatase f-like	478	20	3.50236e-57	0.593	1	F:GO:0005515		IPR003961 (SMART); IPR003961 (PFAM); IPR013783 (G3DSA:2.60.40.GENE3D); CYTOPLASMIC_DOMAIN (PHOBIUS); TRANSMEMBRANE (PHOBIUS); NON_CYTOPLASMIC_DOMAIN (PHOBIUS); IPR003961 (PROSITE_PROFILES); IPR003961 (SUPERFAMILY); TMhelix (TMHMM)
Aqu2.1.27410_001	poly	685	20	0	0.5725	3	F:GO:0008270; P:GO:0006471; F:GO:0003950		IPR018123 (SMART); IPR008893 (SMART); IPR004102 (PFAM); IPR008893 (G3DSA:2.20.140.GENE3D); IPR004102 (G3DSA:1.20.142.GENE3D); IPR008893 (PFAM); IPR012317 (PFAM); IPR004170 (PFAM); IPR012317 (G3DSA:3.90.228.GENE3D); PTHR15447 (PANTHER); IPR012317 (PROSITE_PROFILES); IPR004102 (PROSITE_PROFILES); IPR004170 (PROSITE_PROFILES); IPR004170 (PROSITE_PROFILES); SSF117839 (SUPERFAMILY); IPR004102 (SUPERFA…
Aqu2.1.27411_001	FOX03	589	20	0	0.6295	6	F:GO:0003700; F:GO:0043565; C:GO:0005634; P:GO:0006355; C:GO:0005667; P:GO:0045449	-	IPR001766 (PRINTS); IPR001766 (SMART); IPR001766 (PFAM); IPR011991 (G3DSA:1.10.10.GENE3D); PTHR11829:SF88 (PANTHER); PTHR11829 (PANTHER); IPR018122 (PROSITE_PATTERNS); IPR001766 (PROSITE_PROFILES); SSF46785 (SUPERFAMILY)
Aqu2.1.27417_001	intersectin-1- partial	222	20	1.15882e-160	0.607	11	F:GO:0005509; P:GO:0007264; F:GO:0005543; C:GO:0030139; P:GO:0051897; F:GO:0005515; P:GO:0042327; P:GO:0043524; C:GO:0030027; P:GO:0043085; F:GO:0019209	-	IPR001849 (SMART); IPR011993 (G3DSA:2.30.29.GENE3D); IPR000008 (PFAM); G3DSA:2.60.40.150 (GENE3D); PTHR12673 (PANTHER); PTHR12673:SF43 (PANTHER); IPR000008 (SUPERFAMILY); SSF50729 (SUPERFAMILY)
Aqu2.1.27423_001	tyrosine-protein kinase isoform srk1-like	693	20	0	0.5985	3	P:GO:0007165; F:GO:0016772; F:GO:0005515	-	Coil (COILS); IPR001452 (SMART); G3DSA:2.30.30.40 (GENE3D); IPR001452 (PFAM); G3DSA:3.80.10.10 (GENE3D); IPR001452 (PROSITE_PROFILES); SSF52047 (SUPERFAMILY); IPR001452 (SUPERFAMILY)
Aqu2.1.27475_001	ras-related protein rab-35-like	108	20	2.31147e-51	0.779	4	F:GO:0005525; F:GO:0016787; P:GO:0007264; P:GO:0015031	-	IPR001806 (PRINTS); G3DSA:3.40.50.300 (GENE3D); IPR001806 (PFAM); PTHR24073:SF213 (PANTHER); PTHR24073 (PANTHER); PS51419 (PROSITE_PROFILES); IPR027417 (SUPERFAMILY)
Aqu2.1.27484_001	e3 ubiquitin-protein ligase trim37	973	20	1.16842e-69	0.562	3	C:GO:0005622; F:GO:0008270; F:GO:0005515	-	Coil (COILS); Coil (COILS); Coil (COILS); IPR000315 (SMART); G3DSA:2.60.210.10 (GENE3D); IPR002083 (PFAM); IPR000315 (PFAM); IPR000315 (G3DSA:4.10.45.GENE3D); PTHR24103 (PANTHER); PTHR24103:SF134 (PANTHER); IPR000315 (PROSITE_PROFILES); IPR002083 (PROSITE_PROFILES); IPR008974 (SUPERFAMILY); SSF57845 (SUPERFAMILY)
Aqu2.1.27485_001	membrane-associated phosphatidylinositol transfer protein 2-like	877	20	0	0.7395	13	F:GO:0008526; P:GO:0006629; C:GO:0043231; F:GO:0005509; C:GO:0016021; P:GO:0007420; F:GO:0005543; P:GO:0007602; C:GO:0044446; C:GO:0044444; C:GO:0031090; C:GO:0012505; P:GO:0015914	-	IPR001666 (PRINTS); IPR023393 (G3DSA:3.30.530.GENE3D); IPR004177 (PFAM); IPR001666 (PFAM); PTHR10658:SF11 (PANTHER); IPR001666 (PANTHER); IPR004177 (PROSITE_PROFILES); SSF55961 (SUPERFAMILY)
Aqu2.1.27487_001	---NA---	109	0			0	-		NON_CYTOPLASMIC_DOMAIN (PHOBIUS); TRANSMEMBRANE (PHOBIUS); CYTOPLASMIC_DOMAIN (PHOBIUS); SignalP-noTM (SIGNALP_EUK)
Aqu2.1.27488_001	TBX5	516	20	0	0.8025	36	F:GO:0003700; P:GO:0055007; P:GO:0003283; P:GO:0060174; P:GO:0003166; P:GO:0030336; P:GO:0003197; P:GO:0060045; C:GO:0015629; C:GO:0005654; F:GO:0008134; P:GO:0001947; P:GO:0051891; P:GO:1900117; P:GO:0003218; P:GO:0060980; P:GO:0035118; P:GO:0045944; C:GO:0005737; P:GO:0003344; P:GO:0003229; P:GO:0010719; P:GO:0003281; P:GO:0003342; P:GO:0006367; C:GO:0005667; P:GO:0007267; P:GO:0030262; F:GO:00…	-	IPR002070 (PRINTS); IPR001699 (PRINTS); IPR001699 (SMART); IPR001699 (G3DSA:2.60.40.GENE3D); IPR001699 (PFAM); IPR001699 (PANTHER); IPR018186 (PROSITE_PATTERNS); TRANSMEMBRANE (PHOBIUS); CYTOPLASMIC_DOMAIN (PHOBIUS); NON_CYTOPLASMIC_DOMAIN (PHOBIUS); IPR001699 (PROSITE_PROFILES); IPR008967 (SUPERFAMILY); TMhelix (TMHMM)
Aqu2.1.27489_001	serine dehydratase-like	322	20	0	0.649	4	P:GO:0006520; F:GO:0030170; F:GO:0016829; F:GO:0003941		IPR001926 (PFAM); G3DSA:3.40.50.1100 (GENE3D); G3DSA:3.40.50.1100 (GENE3D); PTHR10314:SF10 (PANTHER); PTHR10314 (PANTHER); IPR001926 (SUPERFAMILY)
Aqu2.1.27498_001	PREDICTED: hypothetical protein LOC100638645 [Amphimedon queenslandica]	136	1	2.25913e-58	0.95	0	-		no IPS match
Aqu2.1.27535_001	minor histocompatibility protein ha-1-like	1032	20	0	0.532	3	F:GO:0046872; C:GO:0005622; P:GO:0035556	-	Coil (COILS); Coil (COILS); Coil (COILS); IPR002219 (SMART); IPR000198 (SMART); G3DSA:3.30.60.20 (GENE3D); IPR001060 (PFAM); IPR000198 (PFAM); IPR000198 (G3DSA:1.10.555.GENE3D); PTHR15228:SF11 (PANTHER); PTHR15228 (PANTHER); IPR002219 (PROSITE_PATTERNS); IPR002219 (PROSITE_PROFILES); IPR000198 (PROSITE_PROFILES); SignalP-TM (SIGNALP_GRAM_POSITIVE); SSF57889 (SUPERFAMILY); SSF103657 (SUPERFAMILY);…
Aqu2.1.27536_001	wd repeat-containing protein 63- partial	678	20	1.26338e-132	0.5955	2	P:GO:0007165; F:GO:0005524		Coil (COILS); Coil (COILS)
Aqu2.1.27543_001	serine threonine-protein kinase chk1 isoform x1	483	20	0	0.6465	11	P:GO:0080090; P:GO:0008630; P:GO:0031323; P:GO:0006996; P:GO:0006468; C:GO:0044446; C:GO:0043232; P:GO:0007095; P:GO:0060255; F:GO:0005524; F:GO:0004674	-	IPR002290 (SMART); IPR000719 (PFAM); G3DSA:1.10.510.10 (GENE3D); G3DSA:3.30.200.20 (GENE3D); PTHR24344 (PANTHER); IPR017441 (PROSITE_PATTERNS); IPR008271 (PROSITE_PATTERNS); IPR000719 (PROSITE_PROFILES); IPR011009 (SUPERFAMILY)
Aqu2.1.27547_001	dbh-like monooxygenase protein 1 homolog	661	20	0	0.5675	5	P:GO:0006584; F:GO:0005507; F:GO:0004500; P:GO:0055114; P:GO:0006570	EC:1.14.17.1	IPR000945 (PRINTS); IPR005018 (SMART); IPR000323 (PFAM); IPR015920 (G3DSA:2.60.40.GENE3D); IPR005018 (PFAM); IPR000323 (G3DSA:2.60.120.GENE3D); PF03712 (PFAM); IPR014784 (G3DSA:2.60.120.GENE3D); IPR000945 (PANTHER); IPR014783 (PROSITE_PATTERNS); CYTOPLASMIC_DOMAIN (PHOBIUS); TRANSMEMBRANE (PHOBIUS); NON_CYTOPLASMIC_DOMAIN (PHOBIUS); IPR005018 (PROSITE_PROFILES); IPR008977 (SUPERFAMILY); IPR008977…
Aqu2.1.27549_001	---NA---	197	0			0	-		CYTOPLASMIC_DOMAIN (PHOBIUS); TRANSMEMBRANE (PHOBIUS); NON_CYTOPLASMIC_DOMAIN (PHOBIUS); TMhelix (TMHMM)
Aqu2.1.27550_001	coatomer subunit alpha isoform x2	1241	20	0	0.82	9	P:GO:0030157; C:GO:0030126; P:GO:0006890; C:GO:0005615; P:GO:0006891; P:GO:0006886; F:GO:0005198; F:GO:0005179; P:GO:0007165	-	IPR020472 (PRINTS); IPR001680 (SMART); IPR016391 (PIRSF); IPR015943 (G3DSA:2.130.10.GENE3D); IPR001680 (PFAM); IPR010714 (PFAM); IPR006692 (PFAM); PTHR19876 (PANTHER); PTHR19876:SF1 (PANTHER); IPR019775 (PROSITE_PATTERNS); IPR017986 (PROSITE_PROFILES); IPR001680 (PROSITE_PROFILES); IPR017986 (SUPERFAMILY)
Aqu2.1.27555_001	mitochondrial	178	20	1.09526e-128	0.789	5	C:GO:0005730; F:GO:0003676; C:GO:0005886; F:GO:0008408; C:GO:0005739	-	IPR006055 (SMART); G3DSA:3.30.420.10 (GENE3D); IPR013520 (PFAM); PTHR11046 (PANTHER); IPR012337 (SUPERFAMILY)
Aqu2.1.27560_001	transmembrane protein 192	285	20	0	0.5855	2	C:GO:0044444; C:GO:0043231	-	PF14802 (PFAM); PTHR31592 (PANTHER); CYTOPLASMIC_DOMAIN (PHOBIUS); TRANSMEMBRANE (PHOBIUS); TRANSMEMBRANE (PHOBIUS); NON_CYTOPLASMIC_DOMAIN (PHOBIUS); CYTOPLASMIC_DOMAIN (PHOBIUS); TRANSMEMBRANE (PHOBIUS); CYTOPLASMIC_DOMAIN (PHOBIUS); NON_CYTOPLASMIC_DOMAIN (PHOBIUS); TRANSMEMBRANE (PHOBIUS); TMhelix (TMHMM); TMhelix (TMHMM); TMhelix (TMHMM); TMhelix (TMHMM)
Aqu2.1.27573_001	gamma-aminobutyric acid type b receptor subunit 2-like	1083	20	0	0.564	3	C:GO:0016021; F:GO:0004965; P:GO:0007216	-	IPR002455 (PRINTS); IPR000337 (PRINTS); G3DSA:3.40.50.2300 (GENE3D); IPR017978 (PFAM); G3DSA:3.40.50.2300 (GENE3D); IPR001828 (PFAM); PTHR10519 (PANTHER); TRANSMEMBRANE (PHOBIUS); TRANSMEMBRANE (PHOBIUS); TRANSMEMBRANE (PHOBIUS); TRANSMEMBRANE (PHOBIUS); CYTOPLASMIC_DOMAIN (PHOBIUS); NON_CYTOPLASMIC_DOMAIN (PHOBIUS); NON_CYTOPLASMIC_DOMAIN (PHOBIUS); TRANSMEMBRANE (PHOBIUS); TRANSMEMBRANE (PHOBIU…
Aqu2.1.27594_001	PREDICTED: hypothetical protein LOC100639448 [Amphimedon queenslandica]	509	1	0	0.66	0	-		no IPS match
Aqu2.1.27597_001	---NA---	224	0			0	-		no IPS match
Aqu2.1.27600_001	---NA---	118	0			0	-		no IPS match
Aqu2.1.27617_001	phosphatidylinositol phosphatase ptprq	3100	20	0	0.468	2	P:GO:0009987; F:GO:0005515	-	IPR003598 (SMART); IPR003961 (SMART); IPR003599 (SMART); IPR013783 (G3DSA:2.60.40.GENE3D); IPR013098 (PFAM); PF13927 (PFAM); IPR013783 (G3DSA:2.60.40.GENE3D); IPR013783 (G3DSA:2.60.40.GENE3D); IPR013783 (G3DSA:2.60.40.GENE3D); IPR013783 (G3DSA:2.60.40.GENE3D); IPR003961 (PFAM); IPR013783 (G3DSA:2.60.40.GENE3D); IPR013783 (G3DSA:2.60.40.GENE3D); IPR013783 (G3DSA:2.60.40.GENE3D); PF13895 (PFAM); IP…
Aqu2.1.27618_001	PREDICTED: hypothetical protein LOC100633393 [Amphimedon queenslandica]	1040	3	0	0.693333	2	P:GO:0007165; F:GO:0005515	-	Coil (COILS); IPR011029 (G3DSA:1.10.533.GENE3D); IPR011029 (G3DSA:1.10.533.GENE3D); IPR000488 (PFAM); TRANSMEMBRANE (PHOBIUS); CYTOPLASMIC_DOMAIN (PHOBIUS); CYTOPLASMIC_DOMAIN (PHOBIUS); TRANSMEMBRANE (PHOBIUS); NON_CYTOPLASMIC_DOMAIN (PHOBIUS); IPR000488 (PROSITE_PROFILES); IPR011029 (SUPERFAMILY); TMhelix (TMHMM); TMhelix (TMHMM); TMhelix (TMHMM)
Aqu2.1.27630_001	---NA---	211	0			0	-		SIGNAL_PEPTIDE_N_REGION (PHOBIUS); SIGNAL_PEPTIDE_C_REGION (PHOBIUS); SIGNAL_PEPTIDE (PHOBIUS); NON_CYTOPLASMIC_DOMAIN (PHOBIUS); SIGNAL_PEPTIDE_H_REGION (PHOBIUS); SignalP-noTM (SIGNALP_EUK); SignalP-TM (SIGNALP_GRAM_POSITIVE); TMhelix (TMHMM)
Aqu2.1.27632_001	---NA---	100	0			0	-		no IPS match
Aqu2.1.27719_001	---NA---	59	0			0	-		no IPS match
Aqu2.1.27720_001	---NA---	20	0			0	-		no IPS match
Aqu2.1.27768_001	PREDICTED: hypothetical protein LOC100639753 [Amphimedon queenslandica]	151	1	2.84936e-05	0.66	0	-		no IPS match
Aqu2.1.27787_001	katanin p60 atpase-containing subunit a-like 2-like	567	20	0	0.686	7	C:GO:0005737; F:GO:0008017; P:GO:0051013; F:GO:0005524; F:GO:0008568; C:GO:0005874; C:GO:0045298	EC:3.6.4.3	IPR003593 (SMART); IPR006594 (SMART); IPR003959 (PFAM); G3DSA:3.40.50.300 (GENE3D); G3DSA:1.10.8.60 (GENE3D); PTHR23074:SF21 (PANTHER); PTHR23074 (PANTHER); IPR006594 (PROSITE_PROFILES); IPR027497 (HAMAP); IPR027417 (SUPERFAMILY)
Aqu2.1.27828_001	krueppel-like factor 6 isoform x1	272	20	4.4051e-45	0.707	14	P:GO:0001525; F:GO:0005515; P:GO:0006366; P:GO:0071310; C:GO:0005794; C:GO:0005730; F:GO:0046872; P:GO:0035914; F:GO:0003677; P:GO:0030033; F:GO:0003700; P:GO:0045893; C:GO:0005667; P:GO:0045449	-	IPR015880 (SMART); IPR013087 (G3DSA:3.30.160.GENE3D); PF13465 (PFAM); PTHR23223 (PANTHER); IPR007087 (PROSITE_PATTERNS); IPR007087 (PROSITE_PROFILES); SSF57667 (SUPERFAMILY)
Aqu2.1.27834_001	protein transport protein sec61 subunit beta	83	20	4.32798e-50	0.771	6	P:GO:0000060; F:GO:0043022; P:GO:0030433; P:GO:0030970; F:GO:0048408; C:GO:0016020	-	IPR016482 (PFAM); IPR016482 (PANTHER); CYTOPLASMIC_DOMAIN (PHOBIUS); NON_CYTOPLASMIC_DOMAIN (PHOBIUS); TRANSMEMBRANE (PHOBIUS); TMhelix (TMHMM)
Aqu2.1.27853_001	triple functional domain isoform x6	766	20	1.16335e-63	0.4615	1	F:GO:0005515		Coil (COILS); IPR018159 (SMART); G3DSA:1.20.58.60 (GENE3D); IPR001251 (PFAM); IPR002017 (PFAM); PTHR22826:SF15 (PANTHER); PTHR22826 (PANTHER); SSF46966 (SUPERFAMILY); SSF46966 (SUPERFAMILY)
Aqu2.1.27870_001	---NA---	20	0			0	-		no IPS match
Aqu2.1.27881_001	tnf receptor-associated factor 6	634	20	4.94091e-31	0.4325	21	P:GO:0031325; P:GO:0044093; P:GO:0006955; P:GO:0009966; P:GO:0002682; P:GO:0007243; P:GO:0016567; P:GO:0048513; P:GO:0010033; P:GO:0051247; P:GO:0030154; P:GO:0007166; P:GO:0001817; C:GO:0071944; F:GO:0019899; P:GO:0044767; C:GO:0044444; P:GO:0048584; C:GO:0016020; P:GO:0006355; F:GO:0008270	-	Coil (COILS); Coil (COILS); IPR002083 (SMART); IPR001841 (SMART); G3DSA:2.60.210.10 (GENE3D); IPR013083 (G3DSA:3.30.40.GENE3D); IPR002083 (PFAM); PF02176 (PFAM); PTHR10131 (PANTHER); IPR001293 (PROSITE_PROFILES); IPR002083 (PROSITE_PROFILES); IPR001841 (PROSITE_PROFILES); SSF57850 (SUPERFAMILY); IPR008974 (SUPERFAMILY)
Aqu2.1.27888_001	spermatogenesis associated 4	222	20	2.53992e-160	0.7195	2	F:GO:0003674; C:GO:0005575		IPR010441 (PFAM); IPR010441 (PANTHER)
Aqu2.1.27915_001	uncharacterized protein loc102356565 isoform x1	215	14	1.22038e-15	0.547143	0	-		no IPS match
Aqu2.1.27925_001	---NA---	63	0			0	-		TRANSMEMBRANE (PHOBIUS); CYTOPLASMIC_DOMAIN (PHOBIUS); NON_CYTOPLASMIC_DOMAIN (PHOBIUS); TRANSMEMBRANE (PHOBIUS); CYTOPLASMIC_DOMAIN (PHOBIUS); TMhelix (TMHMM)
Aqu2.1.27926_001	zinc finger bed domain-containing protein 4-like	151	20	6.80337e-50	0.5475	3	F:GO:0003676; F:GO:0046983; F:GO:0003677		Coil (COILS); PTHR23272:SF0 (PANTHER); PTHR23272 (PANTHER); SSF140996 (SUPERFAMILY)
Aqu2.1.27943_001	---NA---	107	0			0	-		no IPS match
Aqu2.1.27964_001	lrr and pyd domains-containing protein 10	1010	20	0	0.4615	2	F:GO:0016787; C:GO:0044424	-	G3DSA:3.80.10.10 (GENE3D); PF05729 (PFAM); G3DSA:3.40.50.300 (GENE3D); PTHR24106 (PANTHER); IPR007111 (PROSITE_PROFILES); SSF52047 (SUPERFAMILY); IPR027417 (SUPERFAMILY)
Aqu2.1.27967_001	sacsin- partial	267	3	4.24446e-54	0.58	2	F:GO:0016787; C:GO:0044424	-	G3DSA:3.80.10.10 (GENE3D); SSF52047 (SUPERFAMILY)
Aqu2.1.27974_001	dna topoisomerase 1-like	402	20	0	0.806	5	F:GO:0003917; F:GO:0003918; F:GO:0003677; C:GO:0005694; P:GO:0006265	EC:5.99.1.2; EC:5.99.1.3	Coil (COILS); IPR001631 (PRINTS); IPR013499 (SMART); IPR014711 (G3DSA:3.90.15.GENE3D); IPR013034 (G3DSA:1.10.10.GENE3D); IPR013500 (PFAM); IPR013030 (G3DSA:2.170.11.GENE3D); IPR008336 (PFAM); PTHR10290 (PANTHER); SignalP-TM (SIGNALP_GRAM_POSITIVE); IPR008336 (SUPERFAMILY); IPR011010 (SUPERFAMILY)
Aqu2.1.28013_001	sh3 and px domain-containing protein 2a isoform x2	884	20	0	0.622	13	F:GO:0010314; P:GO:0001654; F:GO:0042169; P:GO:0045600; F:GO:0070273; P:GO:0071800; C:GO:0002102; P:GO:0007507; F:GO:0032266; P:GO:0060612; P:GO:0060348; F:GO:0080025; C:GO:0005737	-	IPR000980 (PRINTS); IPR000980 (SMART); IPR001452 (SMART); IPR000980 (PFAM); IPR000980 (G3DSA:3.30.505.GENE3D); PF14604 (PFAM); G3DSA:2.30.30.40 (GENE3D); G3DSA:2.30.30.40 (GENE3D); IPR011511 (PFAM); G3DSA:2.30.30.40 (GENE3D); PTHR15706:SF2 (PANTHER); PTHR15706 (PANTHER); IPR001452 (PROSITE_PROFILES); IPR001452 (PROSITE_PROFILES); IPR001452 (PROSITE_PROFILES); IPR000980 (PROSITE_PROFILES); IPR0014…
Aqu2.1.28043_001	deleted in malignant brain tumors 1	302	20	1.35456e-137	0.69	3	C:GO:0016020; F:GO:0005044; F:GO:0005515		IPR001190 (PRINTS); IPR001190 (PFAM); G3DSA:3.10.250.10 (GENE3D); G3DSA:2.10.25.10 (GENE3D); PTHR19331 (PANTHER); SIGNAL_PEPTIDE_H_REGION (PHOBIUS); SIGNAL_PEPTIDE_N_REGION (PHOBIUS); SIGNAL_PEPTIDE_C_REGION (PHOBIUS); SIGNAL_PEPTIDE (PHOBIUS); NON_CYTOPLASMIC_DOMAIN (PHOBIUS); IPR001190 (PROSITE_PROFILES); IPR000742 (PROSITE_PROFILES); SignalP-TM (SIGNALP_GRAM_POSITIVE); SignalP-noTM (SIGNALP_EU…
Aqu2.1.28044_001	---NA---	25	0			0	-		no IPS match
Aqu2.1.28045_001	deleted in malignant brain tumors 1	3216	20	0	0.6575	11	C:GO:0030670; F:GO:0005515; P:GO:0048518; P:GO:0051707; C:GO:0005576; P:GO:0030855; P:GO:0045087; F:GO:0005044; P:GO:0007218; C:GO:0016021; F:GO:0004930	-	Coil (COILS); IPR001190 (PRINTS); IPR003598 (SMART); IPR000203 (SMART); IPR003599 (SMART); IPR017448 (SMART); IPR003961 (SMART); IPR013783 (G3DSA:2.60.40.GENE3D); IPR013098 (PFAM); IPR013783 (G3DSA:2.60.40.GENE3D); G3DSA:2.10.25.10 (GENE3D); IPR013783 (G3DSA:2.60.40.GENE3D); IPR000203 (PFAM); IPR013783 (G3DSA:2.60.40.GENE3D); IPR013783 (G3DSA:2.60.40.GENE3D); IPR000832 (PFAM); IPR013783 (G3DSA:2.…
Aqu2.1.28058_001	ubiquitin carboxyl-terminal hydrolase 7-like	1078	20	0	0.6915	5	F:GO:0008234; P:GO:0010468; P:GO:0090304; F:GO:0005515; P:GO:0006511	-	IPR002083 (SMART); IPR002083 (PFAM); G3DSA:2.60.210.10 (GENE3D); G3DSA:2.20.210.10 (GENE3D); IPR001394 (PFAM); PF14533 (PFAM); IPR024729 (PFAM); PTHR24006:SF89 (PANTHER); PTHR24006 (PANTHER); IPR018200 (PROSITE_PATTERNS); IPR018200 (PROSITE_PATTERNS); IPR002083 (PROSITE_PROFILES); IPR028889 (PROSITE_PROFILES); IPR008974 (SUPERFAMILY); SSF54001 (SUPERFAMILY)
Aqu2.1.28075_001	synapse differentiation-inducing gene protein 1-like	144	20	4.59209e-16	0.5565	2	C:GO:0016021; P:GO:0009607		IPR007593 (PFAM); PTHR14948 (PANTHER); PTHR14948:SF3 (PANTHER); TRANSMEMBRANE (PHOBIUS); NON_CYTOPLASMIC_DOMAIN (PHOBIUS); NON_CYTOPLASMIC_DOMAIN (PHOBIUS); TRANSMEMBRANE (PHOBIUS); CYTOPLASMIC_DOMAIN (PHOBIUS); TMhelix (TMHMM); TMhelix (TMHMM)
Aqu2.1.28083_001	gamma-aminobutyric acid type b receptor subunit 1-like	340	20	2.79067e-38	0.5165	3	P:GO:0007186; C:GO:0016021; F:GO:0004965	-	IPR002455 (PRINTS); IPR001828 (PFAM); G3DSA:3.40.50.2300 (GENE3D); G3DSA:3.40.50.2300 (GENE3D); PTHR10519 (PANTHER); NON_CYTOPLASMIC_DOMAIN (PHOBIUS); TRANSMEMBRANE (PHOBIUS); SIGNAL_PEPTIDE (PHOBIUS); SIGNAL_PEPTIDE_H_REGION (PHOBIUS); SIGNAL_PEPTIDE_N_REGION (PHOBIUS); TRANSMEMBRANE (PHOBIUS); CYTOPLASMIC_DOMAIN (PHOBIUS); SIGNAL_PEPTIDE_C_REGION (PHOBIUS); NON_CYTOPLASMIC_DOMAIN (PHOBIUS); Sig…
Aqu2.1.28163_001	---NA---	147	0			0	-		no IPS match
Aqu2.1.28177_001	latent-transforming growth factor beta-binding protein 1- partial	3197	20	6.63324e-166	0.5305	4	F:GO:0003824; F:GO:0004867; F:GO:0005509; F:GO:0005515	-	Coil (COILS); Coil (COILS); IPR002223 (PRINTS); IPR001881 (SMART); IPR002223 (SMART); IPR000436 (SMART); IPR003598 (SMART); IPR000742 (SMART); IPR003599 (SMART); IPR002223 (PFAM); IPR013783 (G3DSA:2.60.40.GENE3D); G3DSA:2.10.25.10 (GENE3D); G3DSA:2.10.25.10 (GENE3D); IPR002223 (G3DSA:4.10.410.GENE3D); IPR002223 (G3DSA:4.10.410.GENE3D); G3DSA:2.10.25.10 (GENE3D); G3DSA:2.10.25.10 (GENE3D); G3DSA:2…
Aqu2.1.28178_001	wall-associated receptor kinase 4-like	950	20	2.58075e-07	0.409	3	F:GO:0005524; P:GO:0006468; F:GO:0004674		IPR002290 (SMART); IPR000719 (PFAM); G3DSA:1.10.510.10 (GENE3D); G3DSA:3.30.200.20 (GENE3D); PTHR24362 (PANTHER); IPR008271 (PROSITE_PATTERNS); IPR000719 (PROSITE_PROFILES); IPR011009 (SUPERFAMILY)
Aqu2.1.28185_001	ZXDC	958	20	0	0.497	2	F:GO:0003676; F:GO:0046872	-	IPR015880 (SMART); IPR007087 (PFAM); PF13894 (PFAM); PF13465 (PFAM); IPR013087 (G3DSA:3.30.160.GENE3D); PTHR11389 (PANTHER); IPR007087 (PROSITE_PATTERNS); IPR007087 (PROSITE_PROFILES); SSF57667 (SUPERFAMILY)
Aqu2.1.28186_001	protein kish-a	76	20	1.76494e-42	0.841	2	C:GO:0000139; C:GO:0016021	-	IPR009653 (PFAM); PTHR13229:SF2 (PANTHER); IPR009653 (PANTHER); NON_CYTOPLASMIC_DOMAIN (PHOBIUS); TRANSMEMBRANE (PHOBIUS); TRANSMEMBRANE (PHOBIUS); NON_CYTOPLASMIC_DOMAIN (PHOBIUS); CYTOPLASMIC_DOMAIN (PHOBIUS); TMhelix (TMHMM); TMhelix (TMHMM)
Aqu2.1.28187_001	serine threonine-protein kinase mark2 isoform x5	863	20	0	0.6625	4	P:GO:0006468; F:GO:0005524; F:GO:0004674; P:GO:0009069	EC:2.7.11.0	IPR002290 (SMART); G3DSA:1.10.510.10 (GENE3D); G3DSA:1.10.8.10 (GENE3D); G3DSA:3.30.310.80 (GENE3D); G3DSA:3.30.200.20 (GENE3D); IPR000719 (PFAM); IPR001772 (PFAM); PTHR24346 (PANTHER); PTHR24346:SF0 (PANTHER); IPR008271 (PROSITE_PATTERNS); IPR017441 (PROSITE_PATTERNS); IPR000719 (PROSITE_PROFILES); IPR015940 (PROSITE_PROFILES); IPR001772 (PROSITE_PROFILES); IPR028375 (SUPERFAMILY); IPR011009 (SU…
Aqu2.1.28189_001	stress-induced-phosphoprotein 1	554	20	0	0.709	2	F:GO:0005509; F:GO:0005515	-	IPR019734 (SMART); IPR006636 (SMART); IPR001440 (PFAM); PF13414 (PFAM); IPR011990 (G3DSA:1.25.40.GENE3D); PTHR22904:SF14 (PANTHER); PTHR22904 (PANTHER); IPR013026 (PROSITE_PROFILES); IPR019734 (PROSITE_PROFILES); SSF48452 (SUPERFAMILY)
Aqu2.1.28194_001	serine arginine-rich splicing factor 6-like isoform x3	351	20	0	0.7885	2	F:GO:0003676; F:GO:0000166	-	IPR000504 (SMART); IPR012677 (G3DSA:3.30.70.GENE3D); IPR000504 (PFAM); PTHR10548 (PANTHER); PTHR10548:SF56 (PANTHER); IPR000504 (PROSITE_PROFILES); SSF54928 (SUPERFAMILY)
Aqu2.1.28196_001	uncharacterized protein c19orf47 homolog isoform x1	350	20	0	0.7675	1	F:GO:0005515		IPR013761 (G3DSA:1.10.150.GENE3D); PTHR21359 (PANTHER); PTHR21359:SF0 (PANTHER); IPR001660 (PROSITE_PROFILES); IPR013761 (SUPERFAMILY)
Aqu2.1.28198_001	pleckstrin homology domain-containing family d member 1	456	20	2.58941e-180	0.615	1	F:GO:0005543	-	Coil (COILS); Coil (COILS); IPR001849 (SMART); IPR001849 (PFAM); IPR011993 (G3DSA:2.30.29.GENE3D); PTHR14383:SF1 (PANTHER); PTHR14383 (PANTHER); IPR001849 (PROSITE_PROFILES); SSF50729 (SUPERFAMILY)
Aqu2.1.28218_001	polypeptide n-acetylgalactosaminyltransferase 2	537	20	0	0.731	5	C:GO:0016021; P:GO:0018193; P:GO:0006493; F:GO:0016757; C:GO:0005794	-	IPR000772 (SMART); G3DSA:3.90.550.10 (GENE3D); IPR027791 (PFAM); G3DSA:2.80.10.50 (GENE3D); IPR000772 (PFAM); IPR001173 (PFAM); PTHR11675 (PANTHER); CYTOPLASMIC_DOMAIN (PHOBIUS); NON_CYTOPLASMIC_DOMAIN (PHOBIUS); TRANSMEMBRANE (PHOBIUS); IPR000772 (PROSITE_PROFILES); SignalP-TM (SIGNALP_GRAM_POSITIVE); IPR000772 (SUPERFAMILY); SSF53448 (SUPERFAMILY); TMhelix (TMHMM)
Aqu2.1.28243_001	salivary glue protein	296	10	9.50852e-18	0.578	0	-		no IPS match
Aqu2.1.28244_001	sjoegren syndrome scleroderma autoantigen 1	161	20	2.03192e-18	0.4885	7	F:GO:0042802; F:GO:0003674; P:GO:0008150; C:GO:0005575; P:GO:0051301; P:GO:0007067; F:GO:0005515		IPR009563 (PFAM); PTHR32137:SF0 (PANTHER); PTHR32137 (PANTHER)
Aqu2.1.28258_001	transmembrane expressed	544	20	0	0.5395	4	F:GO:0015105; C:GO:0016021; P:GO:0015700; P:GO:0055085	-	IPR000802 (PRINTS); IPR004680 (PFAM); PTHR10283:SF21 (PANTHER); PTHR10283 (PANTHER); TRANSMEMBRANE (PHOBIUS); TRANSMEMBRANE (PHOBIUS); TRANSMEMBRANE (PHOBIUS); NON_CYTOPLASMIC_DOMAIN (PHOBIUS); CYTOPLASMIC_DOMAIN (PHOBIUS); NON_CYTOPLASMIC_DOMAIN (PHOBIUS); NON_CYTOPLASMIC_DOMAIN (PHOBIUS); TRANSMEMBRANE (PHOBIUS); CYTOPLASMIC_DOMAIN (PHOBIUS); NON_CYTOPLASMIC_DOMAIN (PHOBIUS); NON_CYTOPLASMIC_DO…
Aqu2.1.28272_001	ankyrin repeat domain-containing protein 26-like	1972	20	0	0.4925	1	F:GO:0005515		Coil (COILS); Coil (COILS); Coil (COILS); Coil (COILS); Coil (COILS); Coil (COILS); Coil (COILS); Coil (COILS); Coil (COILS); Coil (COILS); Coil (COILS); Coil (COILS); Coil (COILS); Coil (COILS); Coil (COILS); IPR002110 (SMART); IPR020683 (G3DSA:1.25.40.GENE3D); IPR020683 (PFAM); PF13857 (PFAM); PTHR24147 (PANTHER); IPR020683 (PROSITE_PROFILES); IPR002110 (PROSITE_PROFILES); IPR020683 (SUPERFAMIL…
Aqu2.1.28273_001	bcl-2-like protein 1-like	234	20	4.05483e-173	0.505	14	C:GO:0044446; P:GO:0097190; P:GO:0016043; P:GO:0010033; C:GO:0005739; F:GO:0005515; P:GO:0097285; P:GO:0044702; P:GO:0065008; P:GO:0043066; P:GO:0044767; P:GO:0032501; P:GO:0048856; C:GO:0016020	-	IPR026298 (PRINTS); SM00337 (SMART); IPR026298 (PFAM); G3DSA:1.10.437.10 (GENE3D); IPR026298 (PANTHER); TRANSMEMBRANE (PHOBIUS); CYTOPLASMIC_DOMAIN (PHOBIUS); CYTOPLASMIC_DOMAIN (PHOBIUS); TRANSMEMBRANE (PHOBIUS); NON_CYTOPLASMIC_DOMAIN (PHOBIUS); IPR002475 (PROSITE_PROFILES); SSF56854 (SUPERFAMILY); TMhelix (TMHMM); TMhelix (TMHMM)
Aqu2.1.28279_001	acylamino-acid-releasing enzyme-like	259	20	3.69743e-153	0.514	1	F:GO:0005515		IPR015943 (G3DSA:2.130.10.GENE3D); PTHR11731:SF7 (PANTHER); PTHR11731 (PANTHER); SSF82171 (SUPERFAMILY)
Aqu2.1.28281_001	helicase mov10l1-like	1071	20	0	0.616	12	P:GO:0033036; P:GO:0044260; C:GO:0043005; P:GO:0000226; F:GO:0017111; P:GO:0010605; F:GO:0000166; P:GO:0007315; C:GO:0044424; P:GO:0044238; P:GO:0010608; P:GO:0050794	EC:3.6.1.15	G3DSA:3.40.50.300 (GENE3D); PF13086 (PFAM); PF13087 (PFAM); PTHR10887 (PANTHER); PTHR10887:SF240 (PANTHER); IPR027417 (SUPERFAMILY)
Aqu2.1.28284_001	grb2-associated-binding protein 1 isoform x4	438	20	0	0.543	1	F:GO:0005543	-	IPR001849 (SMART); IPR001849 (PFAM); IPR011993 (G3DSA:2.30.29.GENE3D); PTHR12156 (PANTHER); PTHR12156:SF13 (PANTHER); IPR001849 (PROSITE_PROFILES); SSF50729 (SUPERFAMILY)
Aqu2.1.28287_001	cyclic amp receptor-like protein a-like	369	20	6.77567e-22	0.4485	9	F:GO:0004888; C:GO:0016020; P:GO:0007166; F:GO:0004930; C:GO:0016021; F:GO:0030552; P:GO:0007186; P:GO:0006506; F:GO:0016758		PTHR23112 (PANTHER); TRANSMEMBRANE (PHOBIUS); TRANSMEMBRANE (PHOBIUS); CYTOPLASMIC_DOMAIN (PHOBIUS); TRANSMEMBRANE (PHOBIUS); TRANSMEMBRANE (PHOBIUS); CYTOPLASMIC_DOMAIN (PHOBIUS); TRANSMEMBRANE (PHOBIUS); NON_CYTOPLASMIC_DOMAIN (PHOBIUS); NON_CYTOPLASMIC_DOMAIN (PHOBIUS); CYTOPLASMIC_DOMAIN (PHOBIUS); NON_CYTOPLASMIC_DOMAIN (PHOBIUS); CYTOPLASMIC_DOMAIN (PHOBIUS); NON_CYTOPLASMIC_DOMAIN (PHOBIUS…
Aqu2.1.28296_001	methylmalonate-semialdehyde dehydrogenase	523	20	0	0.848	6	F:GO:0004491; P:GO:0055114; P:GO:0006020; P:GO:0006550; P:GO:0006552; P:GO:0006574	EC:1.2.1.27	IPR015590 (PFAM); IPR010061 (TIGRFAM); IPR016163 (G3DSA:3.40.309.GENE3D); IPR016162 (G3DSA:3.40.605.GENE3D); PTHR11699 (PANTHER); IPR010061 (PTHR11699:PANTHER); IPR016160 (PROSITE_PATTERNS); SIGNAL_PEPTIDE_C_REGION (PHOBIUS); SIGNAL_PEPTIDE (PHOBIUS); SIGNAL_PEPTIDE_H_REGION (PHOBIUS); SIGNAL_PEPTIDE_N_REGION (PHOBIUS); NON_CYTOPLASMIC_DOMAIN (PHOBIUS); SignalP-TM (SIGNALP_GRAM_POSITIVE); IPR0161…
Aqu2.1.28297_001	signal-induced proliferation-associated 1-like protein 2 isoform x2	1573	20	0	0.568	2	F:GO:0005096; P:GO:0051056	-	Coil (COILS); IPR000331 (PFAM); PTHR15711 (PANTHER); PTHR15711:SF0 (PANTHER); IPR000331 (PROSITE_PROFILES); SSF111347 (SUPERFAMILY)
Aqu2.1.28349_001	---NA---	54	0			0	-		SignalP-noTM (SIGNALP_EUK)
Aqu2.1.28359_001	vacuolar protein sorting-associated protein 13c-like	314	2	3.27545e-59	0.555	0	-		no IPS match
Aqu2.1.28363_001	---NA---	81	0			0	-		no IPS match
Aqu2.1.28372_001	---NA---	378	0			0	-		no IPS match
Aqu2.1.28374_001	protein	101	20	8.85937e-16	0.5485	1	P:GO:0006810	-	no IPS match
Aqu2.1.28445_001	nidogen and egf-like domain-containing protein 1	489	20	6.07418e-38	0.474	1	P:GO:0007160		IPR003886 (PFAM); CYTOPLASMIC_DOMAIN (PHOBIUS); NON_CYTOPLASMIC_DOMAIN (PHOBIUS); SIGNAL_PEPTIDE_N_REGION (PHOBIUS); TRANSMEMBRANE (PHOBIUS); SIGNAL_PEPTIDE_C_REGION (PHOBIUS); SIGNAL_PEPTIDE_H_REGION (PHOBIUS); SIGNAL_PEPTIDE (PHOBIUS); SignalP-noTM (SIGNALP_EUK); TMhelix (TMHMM); TMhelix (TMHMM)
Aqu2.1.28446_001	mitogen-activated protein kinase 15-like	581	20	0	0.757	6	F:GO:0004707; P:GO:0000165; P:GO:0006468; F:GO:0005524; P:GO:0007178; P:GO:0009069	EC:2.7.11.24	IPR002290 (SMART); IPR000719 (PFAM); G3DSA:1.10.510.10 (GENE3D); G3DSA:3.30.200.20 (GENE3D); PTHR24055 (PANTHER); PTHR24055:SF114 (PANTHER); IPR003527 (PROSITE_PATTERNS); IPR008271 (PROSITE_PATTERNS); IPR017441 (PROSITE_PATTERNS); IPR000719 (PROSITE_PROFILES); IPR011009 (SUPERFAMILY)
Aqu2.1.28447_001	alpha-tectorin- partial	272	20	4.97369e-120	0.477	7	C:GO:0016021; C:GO:0016020; P:GO:0007160; F:GO:0005509; P:GO:0008150; C:GO:0005576; C:GO:0005575		SIGNAL_PEPTIDE_N_REGION (PHOBIUS); SIGNAL_PEPTIDE_H_REGION (PHOBIUS); SIGNAL_PEPTIDE (PHOBIUS); NON_CYTOPLASMIC_DOMAIN (PHOBIUS); SIGNAL_PEPTIDE_C_REGION (PHOBIUS); SignalP-noTM (SIGNALP_EUK)
Aqu2.1.28461_001	c protein alpha-antigen	203	2	1.75456e-08	0.485	0	-		NON_CYTOPLASMIC_DOMAIN (PHOBIUS); CYTOPLASMIC_DOMAIN (PHOBIUS); TRANSMEMBRANE (PHOBIUS); TMhelix (TMHMM)
Aqu2.1.28462_001	PREDICTED: hypothetical protein LOC100640781, partial [Amphimedon queenslandica]	162	3	1.88982e-17	0.64	2	P:GO:0008152; F:GO:0003824		no IPS match
Aqu2.1.28466_001	---NA---	53	0			0	-		TRANSMEMBRANE (PHOBIUS); NON_CYTOPLASMIC_DOMAIN (PHOBIUS); TRANSMEMBRANE (PHOBIUS); CYTOPLASMIC_DOMAIN (PHOBIUS); NON_CYTOPLASMIC_DOMAIN (PHOBIUS); TMhelix (TMHMM); TMhelix (TMHMM)
Aqu2.1.28471_001	eukaryotic translation initiation factor 4 gamma 2-like	783	20	1.4622e-101	0.548	3	P:GO:0007498; F:GO:0005515; F:GO:0003723	-	IPR003890 (SMART); IPR016021 (G3DSA:1.25.40.GENE3D); IPR016021 (G3DSA:1.25.40.GENE3D); IPR016021 (G3DSA:1.25.40.GENE3D); IPR003890 (PFAM); PTHR23253:SF5 (PANTHER); PTHR23253 (PANTHER); IPR003307 (PROSITE_PROFILES); IPR016024 (SUPERFAMILY); IPR016024 (SUPERFAMILY); IPR016024 (SUPERFAMILY)
Aqu2.1.28474_001	synaptonemal complex protein 3	235	20	1.04278e-166	0.6515	1	P:GO:0035093		Coil (COILS); IPR006888 (PFAM); IPR006888 (PANTHER); PTHR19368:SF5 (PANTHER)
Aqu2.1.28498_001	batten s disease protein cln3 family protein	418	20	0	0.532	1	C:GO:0016020		IPR003492 (PRINTS); IPR003492 (PFAM); G3DSA:1.20.1250.20 (GENE3D); IPR003492 (PANTHER); CYTOPLASMIC_DOMAIN (PHOBIUS); NON_CYTOPLASMIC_DOMAIN (PHOBIUS); CYTOPLASMIC_DOMAIN (PHOBIUS); TRANSMEMBRANE (PHOBIUS); CYTOPLASMIC_DOMAIN (PHOBIUS); TRANSMEMBRANE (PHOBIUS); TRANSMEMBRANE (PHOBIUS); TRANSMEMBRANE (PHOBIUS); TRANSMEMBRANE (PHOBIUS); NON_CYTOPLASMIC_DOMAIN (PHOBIUS); NON_CYTOPLASMIC_DOMAIN (PHOB…
Aqu2.1.28547_001	short-chain collagen c4-like	192	20	3.05853e-77	0.7185	0	-		PTHR24024 (PANTHER); PTHR24024:SF12 (PANTHER); NON_CYTOPLASMIC_DOMAIN (PHOBIUS); SIGNAL_PEPTIDE_N_REGION (PHOBIUS); SIGNAL_PEPTIDE (PHOBIUS); SIGNAL_PEPTIDE_C_REGION (PHOBIUS); SIGNAL_PEPTIDE_H_REGION (PHOBIUS); SignalP-noTM (SIGNALP_EUK)
Aqu2.1.28559_001	ubiquitin carboxyl-terminal hydrolase 47-like	643	20	7.65379e-135	0.5925	5	P:GO:0007165; F:GO:0005524; F:GO:0046872; F:GO:0008081; F:GO:0003950		IPR011029 (G3DSA:1.10.533.GENE3D); G3DSA:3.40.50.300 (GENE3D); IPR011029 (SUPERFAMILY); IPR027417 (SUPERFAMILY)
Aqu2.1.28586_001	---NA---	116	0			0	-		CYTOPLASMIC_DOMAIN (PHOBIUS); NON_CYTOPLASMIC_DOMAIN (PHOBIUS); NON_CYTOPLASMIC_DOMAIN (PHOBIUS); TRANSMEMBRANE (PHOBIUS); TRANSMEMBRANE (PHOBIUS); CYTOPLASMIC_DOMAIN (PHOBIUS); TRANSMEMBRANE (PHOBIUS); TMhelix (TMHMM); TMhelix (TMHMM); TMhelix (TMHMM)
Aqu2.1.28587_001	stromal interaction molecule 2	649	20	0	0.515	5	P:GO:0044699; P:GO:0065007; C:GO:0044464; C:GO:0016020; F:GO:0005515	-	Coil (COILS); Coil (COILS); Coil (COILS); IPR011510 (PFAM); IPR013761 (G3DSA:1.10.150.GENE3D); PTHR15136 (PANTHER); TRANSMEMBRANE (PHOBIUS); TRANSMEMBRANE (PHOBIUS); CYTOPLASMIC_DOMAIN (PHOBIUS); NON_CYTOPLASMIC_DOMAIN (PHOBIUS); NON_CYTOPLASMIC_DOMAIN (PHOBIUS); IPR001660 (PROSITE_PROFILES); IPR013761 (SUPERFAMILY); TMhelix (TMHMM)
Aqu2.1.28596_001	PREDICTED: hypothetical protein LOC100638610 [Amphimedon queenslandica]	365	3	1.09961e-09	0.563333	0	-		CYTOPLASMIC_DOMAIN (PHOBIUS); NON_CYTOPLASMIC_DOMAIN (PHOBIUS); CYTOPLASMIC_DOMAIN (PHOBIUS); CYTOPLASMIC_DOMAIN (PHOBIUS); TRANSMEMBRANE (PHOBIUS); TRANSMEMBRANE (PHOBIUS); NON_CYTOPLASMIC_DOMAIN (PHOBIUS); TRANSMEMBRANE (PHOBIUS); TRANSMEMBRANE (PHOBIUS); TMhelix (TMHMM); TMhelix (TMHMM); TMhelix (TMHMM); TMhelix (TMHMM)
Aqu2.1.28598_001	lrr and pyd domains-containing protein 3-like	1112	20	0	0.4675	2	F:GO:0016787; C:GO:0044424	-	Coil (COILS); G3DSA:3.40.50.300 (GENE3D); PF05729 (PFAM); G3DSA:3.40.50.300 (GENE3D); PTHR24106 (PANTHER); PTHR24106:SF0 (PANTHER); NON_CYTOPLASMIC_DOMAIN (PHOBIUS); TRANSMEMBRANE (PHOBIUS); TRANSMEMBRANE (PHOBIUS); TRANSMEMBRANE (PHOBIUS); CYTOPLASMIC_DOMAIN (PHOBIUS); CYTOPLASMIC_DOMAIN (PHOBIUS); TRANSMEMBRANE (PHOBIUS); NON_CYTOPLASMIC_DOMAIN (PHOBIUS); NON_CYTOPLASMIC_DOMAIN (PHOBIUS); IPR00…
Aqu2.1.28609_001	---NA---	182	0			0	-		no IPS match
Aqu2.1.28619_001	ring finger protein nhl-1-like	102	20	1.50362e-48	0.5845	3	P:GO:0030097; F:GO:0008270; F:GO:0005515	-	IPR001841 (SMART); IPR013083 (G3DSA:3.30.40.GENE3D); IPR018957 (PFAM); PTHR24103:SF209 (PANTHER); PTHR24103 (PANTHER); IPR001841 (PROSITE_PROFILES); SSF57850 (SUPERFAMILY)
Aqu2.1.28654_001	phd finger protein 20 isoform x2	1082	20	0	0.5265	2	F:GO:0008270; F:GO:0005515		Coil (COILS); Coil (COILS); IPR001965 (SMART); IPR013083 (G3DSA:3.30.40.GENE3D); IPR019787 (PFAM); G3DSA:2.30.30.270 (GENE3D); PTHR15856 (PANTHER); PTHR15856:SF5 (PANTHER); IPR007087 (PROSITE_PATTERNS); IPR019786 (PROSITE_PATTERNS); IPR007087 (PROSITE_PROFILES); IPR011011 (SUPERFAMILY); IPR016197 (SUPERFAMILY)
Aqu2.1.28655_001	glutaminase kidney mitochondrial-like	442	20	0	0.6605	2	P:GO:0006541; F:GO:0004359	EC:3.5.1.2	IPR015868 (PFAM); IPR015868 (TIGRFAM); IPR012338 (G3DSA:3.40.710.GENE3D); IPR015868 (PANTHER); IPR015868 (HAMAP); IPR012338 (SUPERFAMILY)
Aqu2.1.28684_001	proteasome inhibitor pi31 subunit	310	20	0	0.477	1	C:GO:0000502		IPR021625 (PFAM); PTHR13266 (PANTHER); PTHR13266:SF1 (PANTHER)
Aqu2.1.28689_001	kinesin-like protein kif2a isoform x2	1448	20	0	0.657	10	F:GO:0003777; P:GO:0055085; F:GO:0008017; P:GO:0007049; C:GO:0016021; C:GO:0005874; F:GO:0005524; P:GO:0007018; C:GO:0005871; C:GO:0045298	-	Coil (COILS); Coil (COILS); Coil (COILS); IPR001752 (PRINTS); IPR001752 (SMART); IPR001752 (G3DSA:3.40.850.GENE3D); IPR006876 (PFAM); IPR001752 (PFAM); IPR027640 (PANTHER); PTHR24115:SF1 (PANTHER); IPR019821 (PROSITE_PATTERNS); CYTOPLASMIC_DOMAIN (PHOBIUS); TRANSMEMBRANE (PHOBIUS); TRANSMEMBRANE (PHOBIUS); CYTOPLASMIC_DOMAIN (PHOBIUS); TRANSMEMBRANE (PHOBIUS); CYTOPLASMIC_DOMAIN (PHOBIUS); CYTOPL…
Aqu2.1.28714_001	elmo domain-containing protein 1	300	20	0	0.6205	2	C:GO:0005856; P:GO:0006909	-	IPR006816 (PFAM); PTHR12771 (PANTHER); IPR006816 (PROSITE_PROFILES)
Aqu2.1.28723_001	receptor-type tyrosine-protein phosphatase delta isoform x2	2966	20	0	0.505	4	F:GO:0004725; P:GO:0035335; P:GO:0006570; F:GO:0005515	EC:3.1.3.48	Coil (COILS); IPR000242 (PRINTS); IPR000242 (SMART); IPR003596 (SMART); IPR003599 (SMART); IPR003598 (SMART); IPR003961 (SMART); IPR003595 (SMART); IPR013098 (PFAM); G3DSA:3.90.190.10 (GENE3D); IPR013783 (G3DSA:2.60.40.GENE3D); IPR013783 (G3DSA:2.60.40.GENE3D); IPR013783 (G3DSA:2.60.40.GENE3D); IPR013783 (G3DSA:2.60.40.GENE3D); IPR013783 (G3DSA:2.60.40.GENE3D); IPR000242 (PFAM); IPR013783 (G3DSA:…
Aqu2.1.28726_001	dual specificity protein phosphatase cdc14a isoform x3	485	20	0	0.7845	12	C:GO:0005737; F:GO:0004725; C:GO:0005730; F:GO:0008138; P:GO:0008283; F:GO:0005515; P:GO:0007049; C:GO:0005819; C:GO:0005813; P:GO:0035335; P:GO:0051301; P:GO:0006570	EC:3.1.3.48	Coil (COILS); G3DSA:3.90.190.10 (GENE3D); PF14671 (PFAM); IPR026068 (PTHR23339:PANTHER); PTHR23339 (PANTHER); SSF52799 (SUPERFAMILY)
Aqu2.1.28743_001	jnk-interacting protein	1093	11	0	0.469091	0	-		Coil (COILS); Coil (COILS); Coil (COILS); Coil (COILS); Coil (COILS)
Aqu2.1.28763_001	fibrinogen c domain-containing protein 1-like	180	20	3.19431e-88	0.8155	0	-		IPR002181 (SMART); IPR014716 (G3DSA:3.90.215.GENE3D); IPR014715 (G3DSA:4.10.530.GENE3D); IPR002181 (PFAM); PTHR19143 (PANTHER); IPR002181 (PROSITE_PROFILES); IPR002181 (SUPERFAMILY)
Aqu2.1.28791_001	protein notum homolog	372	20	0	0.6255	0	-		IPR004963 (PFAM); IPR004963 (PANTHER); NON_CYTOPLASMIC_DOMAIN (PHOBIUS); SIGNAL_PEPTIDE_N_REGION (PHOBIUS); SIGNAL_PEPTIDE_C_REGION (PHOBIUS); SIGNAL_PEPTIDE (PHOBIUS); SIGNAL_PEPTIDE_H_REGION (PHOBIUS); SignalP-noTM (SIGNALP_EUK)
Aqu2.1.28798_001	hemicentin-1	3082	20	2.20466e-159	0.391	4	P:GO:0007218; C:GO:0016021; F:GO:0004930; F:GO:0005515		Coil (COILS); IPR003598 (SMART); IPR000203 (SMART); IPR003596 (SMART); IPR003599 (SMART); IPR013783 (G3DSA:2.60.40.GENE3D); IPR013783 (G3DSA:2.60.40.GENE3D); IPR013783 (G3DSA:2.60.40.GENE3D); IPR000832 (PFAM); IPR000203 (PFAM); IPR013783 (G3DSA:2.60.40.GENE3D); PF13895 (PFAM); G3DSA:1.20.1070.10 (GENE3D); IPR013098 (PFAM); IPR013783 (G3DSA:2.60.40.GENE3D); G3DSA:2.10.25.10 (GENE3D); IPR013783 (G3…
Aqu2.1.28800_001	---NA---	40	0			0	-		no IPS match
Aqu2.1.28801_001	hemicentin-1 isoform x3	3422	20	0	0.4015	4	C:GO:0016020; P:GO:0007218; F:GO:0005515; F:GO:0004930		PR01832 (PRINTS); IPR000203 (SMART); IPR003599 (SMART); IPR003596 (SMART); IPR003598 (SMART); IPR013783 (G3DSA:2.60.40.GENE3D); PF13927 (PFAM); PF13895 (PFAM); IPR013783 (G3DSA:2.60.40.GENE3D); IPR013783 (G3DSA:2.60.40.GENE3D); IPR013783 (G3DSA:2.60.40.GENE3D); IPR013783 (G3DSA:2.60.40.GENE3D); IPR013783 (G3DSA:2.60.40.GENE3D); IPR013098 (PFAM); IPR000203 (PFAM); IPR013783 (G3DSA:2.60.40.GENE3D);…
Aqu2.1.28802_001	hemicentin-1	214	20	1.04329e-12	0.419	1	F:GO:0005515		IPR003598 (SMART); IPR003599 (SMART); IPR013783 (G3DSA:2.60.40.GENE3D); PF13895 (PFAM); IPR013783 (G3DSA:2.60.40.GENE3D); PTHR10489 (PANTHER); IPR007110 (PROSITE_PROFILES); IPR007110 (PROSITE_PROFILES); SSF48726 (SUPERFAMILY); SSF48726 (SUPERFAMILY)
Aqu2.1.28814_001	transmembrane protein 116 isoform x1	369	20	2.39531e-24	0.429	3	F:GO:0004930; P:GO:0007186; C:GO:0016021		IPR000276 (PFAM); G3DSA:1.20.1070.10 (GENE3D); PTHR23112 (PANTHER); TRANSMEMBRANE (PHOBIUS); NON_CYTOPLASMIC_DOMAIN (PHOBIUS); CYTOPLASMIC_DOMAIN (PHOBIUS); TRANSMEMBRANE (PHOBIUS); TRANSMEMBRANE (PHOBIUS); NON_CYTOPLASMIC_DOMAIN (PHOBIUS); NON_CYTOPLASMIC_DOMAIN (PHOBIUS); CYTOPLASMIC_DOMAIN (PHOBIUS); CYTOPLASMIC_DOMAIN (PHOBIUS); TRANSMEMBRANE (PHOBIUS); TRANSMEMBRANE (PHOBIUS); TRANSMEMBRANE …
Aqu2.1.28816_001	60s ribosomal protein l23a	197	20	1.7204e-134	0.8745	17	P:GO:0000184; P:GO:0006415; P:GO:0006413; F:GO:0005515; P:GO:0031016; F:GO:0000166; C:GO:0031932; P:GO:0008283; P:GO:0006414; C:GO:0022625; P:GO:0051726; F:GO:0003735; P:GO:0019083; P:GO:0006614; C:GO:0005634; F:GO:0019843; P:GO:0042254	-	IPR019985 (TIGRFAM); IPR005633 (PFAM); IPR013025 (PFAM); IPR012677 (G3DSA:3.30.70.GENE3D); PTHR11620 (PANTHER); IPR001014 (PROSITE_PATTERNS); IPR013025 (HAMAP); IPR012678 (SUPERFAMILY)
Aqu2.1.28822_001	rab gtpase-binding effector protein 1- partial	871	3	0	0.65	0	-		Coil (COILS); Coil (COILS); Coil (COILS); Coil (COILS); Coil (COILS); Coil (COILS); Coil (COILS); Coil (COILS); G3DSA:1.20.5.730 (GENE3D); PTHR31179 (PANTHER); PTHR31179:SF0 (PANTHER); SSF103652 (SUPERFAMILY)
Aqu2.1.28823_001	proline dehydrogenase mitochondrial-like	544	20	0	0.575	6	P:GO:0006537; P:GO:0006562; F:GO:0004657; P:GO:0055114; P:GO:0006525; P:GO:0006561	EC:1.5.99.8	IPR002872 (PFAM); G3DSA:3.20.20.220 (GENE3D); IPR015659 (PANTHER); SIGNAL_PEPTIDE_C_REGION (PHOBIUS); SIGNAL_PEPTIDE_N_REGION (PHOBIUS); NON_CYTOPLASMIC_DOMAIN (PHOBIUS); SIGNAL_PEPTIDE (PHOBIUS); SIGNAL_PEPTIDE_H_REGION (PHOBIUS); SignalP-TM (SIGNALP_GRAM_POSITIVE); SignalP-noTM (SIGNALP_GRAM_NEGATIVE); SSF51730 (SUPERFAMILY)
Aqu2.1.28831_001	clustered mitochondria protein homolog	1426	20	0	0.5655	1	F:GO:0005515		IPR019734 (SMART); IPR011990 (G3DSA:1.25.40.GENE3D); IPR028275 (PFAM); IPR025697 (PFAM); PF13424 (PFAM); PF13374 (PFAM); PF12807 (PFAM); PTHR12601:SF6 (PANTHER); PTHR12601 (PANTHER); SSF48452 (SUPERFAMILY); IPR023231 (SUPERFAMILY)
Aqu2.1.28833_001	n-alpha-acetyltransferase auxiliary subunit	1479	20	0	0.558	1	F:GO:0005515		IPR011990 (G3DSA:1.25.40.GENE3D); IPR019183 (PFAM); PTHR22767:SF3 (PANTHER); PTHR22767 (PANTHER); TRANSMEMBRANE (PHOBIUS); CYTOPLASMIC_DOMAIN (PHOBIUS); NON_CYTOPLASMIC_DOMAIN (PHOBIUS); SSF48452 (SUPERFAMILY)
Aqu2.1.28834_001	---NA---	99	0			0	-		SIGNAL_PEPTIDE_C_REGION (PHOBIUS); SIGNAL_PEPTIDE_N_REGION (PHOBIUS); NON_CYTOPLASMIC_DOMAIN (PHOBIUS); SIGNAL_PEPTIDE (PHOBIUS); SIGNAL_PEPTIDE_H_REGION (PHOBIUS); SignalP-noTM (SIGNALP_EUK); TMhelix (TMHMM)
Aqu2.1.28836_001	---NA---	374	0			0	-		no IPS match
Aqu2.1.28843_001	atp-dependent rna helicase tdrd12 isoform x1	1642	20	0	0.4375	3	F:GO:0008026; F:GO:0003676; F:GO:0005524	-	IPR002999 (SMART); IPR014001 (SMART); G3DSA:2.60.40.790 (GENE3D); IPR007052 (PFAM); IPR002999 (PFAM); G3DSA:2.30.30.140 (GENE3D); IPR011545 (PFAM); G3DSA:3.40.50.300 (GENE3D); PTHR22655 (PANTHER); IPR007052 (PROSITE_PROFILES); IPR002999 (PROSITE_PROFILES); IPR002999 (PROSITE_PROFILES); IPR014014 (PROSITE_PROFILES); IPR014001 (PROSITE_PROFILES); SSF63748 (SUPERFAMILY); IPR027417 (SUPERFAMILY); SSF…
Aqu2.1.28844_001	replication-associated protein	417	2	5.0089e-05	0.465	2	F:GO:0003723; F:GO:0003724		IPR000605 (PFAM); G3DSA:3.40.50.300 (GENE3D); G3DSA:3.40.50.300 (GENE3D); IPR027417 (SUPERFAMILY)
Aqu2.1.28846_001	exosome complex component rrp42	281	20	0	0.7035	1	C:GO:0005575		IPR015847 (PFAM); IPR001247 (PFAM); PTHR11097:SF5 (PANTHER); PTHR11097 (PANTHER); IPR015847 (SUPERFAMILY); IPR020568 (SUPERFAMILY)
Aqu2.1.28857_001	u-box domain-containing protein 33-like	768	20	0	0.649	4	F:GO:0004672; P:GO:0006468; F:GO:0005524; F:GO:0005515	-	Coil (COILS); Coil (COILS); G3DSA:3.30.200.20 (GENE3D); G3DSA:1.10.510.10 (GENE3D); IPR015915 (G3DSA:2.120.10.GENE3D); IPR001245 (PFAM); PTHR23257 (PANTHER); IPR017441 (PROSITE_PATTERNS); CYTOPLASMIC_DOMAIN (PHOBIUS); TRANSMEMBRANE (PHOBIUS); NON_CYTOPLASMIC_DOMAIN (PHOBIUS); IPR000719 (PROSITE_PROFILES); SSF117281 (SUPERFAMILY); IPR011009 (SUPERFAMILY)
Aqu2.1.28867_001	major vault protein	166	20	4.03749e-31	0.877	3	C:GO:0005634; C:GO:0005737; C:GO:0030529	-	IPR021870 (PFAM); PTHR14165 (PANTHER)
Aqu2.1.28868_001	synaptic vesicle 2-related protein	125	20	1.29529e-65	0.5935	2	P:GO:0006810; F:GO:0005215	-	PTHR24064:SF107 (PANTHER); PTHR24064 (PANTHER); TRANSMEMBRANE (PHOBIUS); CYTOPLASMIC_DOMAIN (PHOBIUS); TRANSMEMBRANE (PHOBIUS); NON_CYTOPLASMIC_DOMAIN (PHOBIUS); NON_CYTOPLASMIC_DOMAIN (PHOBIUS); TRANSMEMBRANE (PHOBIUS); CYTOPLASMIC_DOMAIN (PHOBIUS); PS51257 (PROSITE_PROFILES); TMhelix (TMHMM); TMhelix (TMHMM); TMhelix (TMHMM)
Aqu2.1.28901_001	PREDICTED: hypothetical protein LOC100636423 [Amphimedon queenslandica]	411	4	1.99018e-27	0.4725	1	F:GO:0003676		Coil (COILS); IPR003034 (SMART); IPR003034 (PFAM); IPR013083 (G3DSA:3.30.40.GENE3D); IPR003034 (G3DSA:1.10.720.GENE3D); IPR019786 (PROSITE_PATTERNS); SSF68906 (SUPERFAMILY); IPR011011 (SUPERFAMILY)
Aqu2.1.28913_001	---NA---	103	0			0	-		no IPS match
Aqu2.1.28926_001	---NA---	69	0			0	-		CYTOPLASMIC_DOMAIN (PHOBIUS); TRANSMEMBRANE (PHOBIUS); NON_CYTOPLASMIC_DOMAIN (PHOBIUS); TMhelix (TMHMM)
Aqu2.1.28956_001	cytoplasmic trna 2-thiolation protein 2	412	20	0	0.576	3	F:GO:0000049; P:GO:0034227; P:GO:0002098	-	IPR019407 (PFAM); IPR014729 (G3DSA:3.40.50.GENE3D); PTHR20882:SF9 (PANTHER); PTHR20882 (PANTHER); IPR019407 (HAMAP); SSF52402 (SUPERFAMILY)
Aqu2.1.28988_001	dna repair protein rad51 homolog 2 isoform 2	367	20	4.55374e-58	0.556	8	P:GO:0006310; P:GO:0044763; F:GO:0005515; P:GO:0006950; C:GO:0005634; F:GO:0003677; F:GO:0005524; F:GO:0008094	-	IPR016467 (PIRSF); IPR003593 (SMART); G3DSA:3.40.50.300 (GENE3D); IPR013632 (PFAM); PTHR22942 (PANTHER); PTHR22942:SF15 (PANTHER); IPR020588 (PROSITE_PROFILES); IPR027417 (SUPERFAMILY)
Aqu2.1.28989_001	transcription factor mitochondrial-like isoform x1	235	20	2.13426e-167	0.5145	12	P:GO:0000003; F:GO:0042162; C:GO:0000784; C:GO:0042645; P:GO:0006391; P:GO:0006390; P:GO:0045893; F:GO:0003682; F:GO:0070363; F:GO:0008301; F:GO:0003700; C:GO:0005739		Coil (COILS); Coil (COILS); IPR009071 (SMART); IPR009071 (PFAM); IPR009071 (G3DSA:1.10.30.GENE3D); IPR009071 (PROSITE_PROFILES); IPR009071 (SUPERFAMILY)
Aqu2.1.29020_001	tyrosine-protein phosphatase non-receptor type 9	1056	20	0	0.6005	7	C:GO:0005737; F:GO:0004725; P:GO:0006909; F:GO:0005515; P:GO:0035335; P:GO:0022008; P:GO:0006570	EC:3.1.3.48	IPR000242 (PRINTS); IPR000242 (SMART); IPR001251 (PFAM); G3DSA:3.90.190.10 (GENE3D); IPR000242 (PFAM); IPR001251 (G3DSA:3.40.525.GENE3D); PTHR19134 (PANTHER); IPR016130 (PROSITE_PATTERNS); IPR000387 (PROSITE_PROFILES); IPR000242 (PROSITE_PROFILES); IPR001251 (PROSITE_PROFILES); IPR001251 (SUPERFAMILY); SSF52799 (SUPERFAMILY)
Aqu2.1.29024_001	serine threonine-protein phosphatase 6 regulatory ankyrin repeat subunit a- partial	1174	20	1.36814e-129	0.474	1	F:GO:0005515		IPR002110 (SMART); IPR020683 (G3DSA:1.25.40.GENE3D); PF13637 (PFAM); IPR020683 (PFAM); PTHR24133 (PANTHER); PTHR24133:SF3 (PANTHER); IPR002110 (PROSITE_PROFILES); IPR020683 (PROSITE_PROFILES); IPR020683 (SUPERFAMILY)
Aqu2.1.29027_001	epidermal growth factor receptor isoform x1	625	20	0	0.672	39	P:GO:0048011; P:GO:0045943; P:GO:0023014; P:GO:0032321; P:GO:0045945; F:GO:0008022; P:GO:0007411; P:GO:0045727; P:GO:0007507; P:GO:0045765; P:GO:0018108; P:GO:0043406; C:GO:0016323; P:GO:0045785; P:GO:0050679; P:GO:0042060; P:GO:0045087; C:GO:0043235; F:GO:0005006; C:GO:0016021; F:GO:0042802; F:GO:0001042; P:GO:0030307; C:GO:0010008; P:GO:0007173; F:GO:0005524; P:GO:0038095; P:GO:0014065; F:GO:00…	-	IPR001245 (PRINTS); IPR020635 (SMART); IPR006212 (SMART); G3DSA:3.30.200.20 (GENE3D); IPR001245 (PFAM); G3DSA:1.10.510.10 (GENE3D); PTHR24416:SF95 (PANTHER); PTHR24416 (PANTHER); IPR017441 (PROSITE_PATTERNS); IPR008266 (PROSITE_PATTERNS); CYTOPLASMIC_DOMAIN (PHOBIUS); NON_CYTOPLASMIC_DOMAIN (PHOBIUS); TRANSMEMBRANE (PHOBIUS); NON_CYTOPLASMIC_DOMAIN (PHOBIUS); TRANSMEMBRANE (PHOBIUS); IPR000719 (P…
Aqu2.1.29033_001	epidermal growth factor receptor-like	822	20	0	0.5155	5	P:GO:0018108; F:GO:0051536; F:GO:0005524; F:GO:0004713; C:GO:0016020	EC:2.7.10.0	IPR001245 (PRINTS); IPR006212 (SMART); IPR020635 (SMART); PF14843 (PFAM); IPR000494 (PFAM); IPR000494 (G3DSA:3.80.20.GENE3D); G3DSA:2.10.220.10 (GENE3D); G3DSA:1.10.510.10 (GENE3D); G3DSA:3.30.200.20 (GENE3D); IPR001245 (PFAM); PTHR24416 (PANTHER); PTHR24416:SF95 (PANTHER); IPR017441 (PROSITE_PATTERNS); IPR008266 (PROSITE_PATTERNS); CYTOPLASMIC_DOMAIN (PHOBIUS); TRANSMEMBRANE (PHOBIUS); NON_CYTOP…
Aqu2.1.29057_001	PREDICTED: hypothetical protein LOC100632454 [Amphimedon queenslandica]	53	1	1.75974e-29	1	0	-		NON_CYTOPLASMIC_DOMAIN (PHOBIUS); TRANSMEMBRANE (PHOBIUS); CYTOPLASMIC_DOMAIN (PHOBIUS); TMhelix (TMHMM)
Aqu2.1.29083_001	phospholipase a-2-activating protein	801	20	2.09565e-130	0.5025	1	F:GO:0005515		IPR020472 (PRINTS); IPR001680 (SMART); IPR013535 (PFAM); IPR015155 (PFAM); IPR015943 (G3DSA:2.130.10.GENE3D); IPR015943 (G3DSA:2.130.10.GENE3D); IPR001680 (PFAM); PTHR19849 (PANTHER); PTHR19849:SF0 (PANTHER); IPR019775 (PROSITE_PATTERNS); IPR013535 (PROSITE_PROFILES); IPR017986 (PROSITE_PROFILES); IPR001680 (PROSITE_PROFILES); IPR001680 (PROSITE_PROFILES); IPR001680 (PROSITE_PROFILES); IPR001680 …
Aqu2.1.29110_001	kinesin light chain 1 isoform x8	484	20	0	0.66	11	P:GO:0035418; C:GO:0030424; C:GO:0031982; C:GO:0005871; C:GO:0043025; F:GO:0015631; P:GO:0006886; C:GO:0005737; C:GO:0016020; C:GO:0045298; F:GO:0003777	-	Coil (COILS); Coil (COILS); IPR002151 (PRINTS); IPR019734 (SMART); IPR001440 (PFAM); IPR015390 (PFAM); PF13424 (PFAM); IPR011990 (G3DSA:1.25.40.GENE3D); PTHR19959 (PANTHER); PTHR19959:SF32 (PANTHER); IPR013026 (PROSITE_PROFILES); SSF48452 (SUPERFAMILY)
Aqu2.1.29116_001	foot protein 1 variant 3	171	20	7.62504e-19	0.4745	2	P:GO:0006904; P:GO:0016192		CYTOPLASMIC_DOMAIN (PHOBIUS); NON_CYTOPLASMIC_DOMAIN (PHOBIUS); CYTOPLASMIC_DOMAIN (PHOBIUS); NON_CYTOPLASMIC_DOMAIN (PHOBIUS); NON_CYTOPLASMIC_DOMAIN (PHOBIUS); TRANSMEMBRANE (PHOBIUS); TRANSMEMBRANE (PHOBIUS); TRANSMEMBRANE (PHOBIUS); TRANSMEMBRANE (PHOBIUS); TMhelix (TMHMM)
Aqu2.1.29125_001	ral gtpase-activating protein subunit beta isoform x2	1525	20	0	0.4885	2	F:GO:0005096; P:GO:0051056		PTHR21344 (PANTHER); PTHR21344:SF0 (PANTHER); IPR000331 (PROSITE_PROFILES); SSF111347 (SUPERFAMILY); SSF111347 (SUPERFAMILY)
Aqu2.1.29132_001	39s ribosomal protein mitochondrial isoform 1	165	20	1.56998e-115	0.758	5	C:GO:0005840; F:GO:0003735; P:GO:0006412; C:GO:0005739; P:GO:0042254	-	IPR000911 (SMART); IPR020784 (PFAM); IPR020783 (G3DSA:1.10.10.GENE3D); IPR020784 (G3DSA:3.30.1550.GENE3D); IPR020783 (PFAM); IPR000911 (PANTHER); PTHR11661:SF1 (PANTHER); PD001367 (PRODOM); IPR000911 (HAMAP); IPR020784 (SUPERFAMILY); IPR020783 (SUPERFAMILY)
Aqu2.1.29138_001	receptor-type tyrosine-protein phosphatase f-like	466	20	3.28678e-52	0.614	1	F:GO:0005515		IPR003961 (SMART); IPR013783 (G3DSA:2.60.40.GENE3D); IPR003961 (PFAM); NON_CYTOPLASMIC_DOMAIN (PHOBIUS); CYTOPLASMIC_DOMAIN (PHOBIUS); CYTOPLASMIC_DOMAIN (PHOBIUS); TRANSMEMBRANE (PHOBIUS); TRANSMEMBRANE (PHOBIUS); TRANSMEMBRANE (PHOBIUS); NON_CYTOPLASMIC_DOMAIN (PHOBIUS); IPR003961 (PROSITE_PROFILES); IPR003961 (SUPERFAMILY); TMhelix (TMHMM); TMhelix (TMHMM); TMhelix (TMHMM)
Aqu2.1.29207_001	tyrosine-protein phosphatase corkscrew-like	451	20	3.01942e-118	0.527	3	F:GO:0005515; F:GO:0004725; P:GO:0006470	-	IPR000980 (PRINTS); IPR000242 (PRINTS); IPR000242 (SMART); IPR000980 (SMART); IPR000980 (PFAM); IPR000980 (G3DSA:3.30.505.GENE3D); G3DSA:3.90.190.10 (GENE3D); IPR000242 (PFAM); PTHR19134 (PANTHER); PTHR19134:SF63 (PANTHER); IPR000242 (PROSITE_PROFILES); IPR000980 (PROSITE_PROFILES); IPR000387 (PROSITE_PROFILES); SSF52799 (SUPERFAMILY); SSF55550 (SUPERFAMILY)
Aqu2.1.29212_001	deleted in malignant brain tumors 1	929	20	0	0.6	3	C:GO:0016020; F:GO:0005044; F:GO:0005515		IPR001190 (PRINTS); IPR017448 (SMART); IPR000742 (SMART); IPR001190 (PFAM); IPR013783 (G3DSA:2.60.40.GENE3D); G3DSA:3.10.250.10 (GENE3D); G3DSA:2.10.25.10 (GENE3D); PTHR19331 (PANTHER); PTHR19331:SF16 (PANTHER); IPR013032 (PROSITE_PATTERNS); IPR013032 (PROSITE_PATTERNS); IPR001190 (PROSITE_PATTERNS); IPR013032 (PROSITE_PATTERNS); IPR001190 (PROSITE_PATTERNS); IPR013032 (PROSITE_PATTERNS); IPR0011…
Aqu2.1.29219_001	solute carrier family 15 member 4	574	20	2.33333e-19	0.4155	1	P:GO:0044765	-	NON_CYTOPLASMIC_DOMAIN (PHOBIUS); TRANSMEMBRANE (PHOBIUS); TRANSMEMBRANE (PHOBIUS); TRANSMEMBRANE (PHOBIUS); TRANSMEMBRANE (PHOBIUS); TRANSMEMBRANE (PHOBIUS); NON_CYTOPLASMIC_DOMAIN (PHOBIUS); TRANSMEMBRANE (PHOBIUS); NON_CYTOPLASMIC_DOMAIN (PHOBIUS); CYTOPLASMIC_DOMAIN (PHOBIUS); CYTOPLASMIC_DOMAIN (PHOBIUS); CYTOPLASMIC_DOMAIN (PHOBIUS); TRANSMEMBRANE (PHOBIUS); TRANSMEMBRANE (PHOBIUS); NON_CYT…
Aqu2.1.29225_001	uncharacterized protein c9orf114 homolog	176	1	1.07269e-86	1	0	-		TRANSMEMBRANE (PHOBIUS); NON_CYTOPLASMIC_DOMAIN (PHOBIUS); CYTOPLASMIC_DOMAIN (PHOBIUS); TMhelix (TMHMM)
Aqu2.1.29237_001	e3 ubiquitin-protein ligase rnf213	5486	20	0	0.573	3	F:GO:0017111; F:GO:0005524; P:GO:0016539		Coil (COILS); IPR003593 (SMART); G3DSA:3.40.50.300 (GENE3D); IPR003959 (PFAM); PTHR22605 (PANTHER); PTHR22605:SF0 (PANTHER); IPR006141 (PROSITE_PROFILES); IPR015940 (PROSITE_PROFILES); IPR027417 (SUPERFAMILY); IPR027417 (SUPERFAMILY)
Aqu2.1.29244_001	---NA---	65	0			0	-		no IPS match
Aqu2.1.29253_001	nuclease harbi1-like	105	20	1.897e-25	0.594	0	-		IPR027806 (PFAM); IPR026103 (PANTHER); PTHR22930:SF0 (PANTHER)
Aqu2.1.29267_001	PREDICTED: hypothetical protein LOC100633104 [Amphimedon queenslandica]	86	1	1.38236e-20	0.87	0	-		no IPS match
Aqu2.1.29278_001	zinc finger bed domain-containing protein 1	76	20	5.26719e-07	0.601	6	F:GO:0003676; F:GO:0046983; F:GO:0003677; F:GO:0046872; F:GO:0004803; C:GO:0000228		SSF57667 (SUPERFAMILY)
Aqu2.1.29289_001	---NA---	73	0			0	-		SSF56672 (SUPERFAMILY)
Aqu2.1.29350_001	PREDICTED: hypothetical protein LOC100635279 [Amphimedon queenslandica]	291	1	5.80219e-138	0.8	1	F:GO:0005515		IPR020067 (PFAM); CYTOPLASMIC_DOMAIN (PHOBIUS); TRANSMEMBRANE (PHOBIUS); TRANSMEMBRANE (PHOBIUS); CYTOPLASMIC_DOMAIN (PHOBIUS); NON_CYTOPLASMIC_DOMAIN (PHOBIUS); IPR020067 (PROSITE_PROFILES); TMhelix (TMHMM); TMhelix (TMHMM)
Aqu2.1.29353_001	PREDICTED: hypothetical protein LOC100635279 [Amphimedon queenslandica]	456	1	0	0.83	1	F:GO:0005515		IPR020067 (PFAM); IPR020067 (G3DSA:1.10.2000.GENE3D); CYTOPLASMIC_DOMAIN (PHOBIUS); NON_CYTOPLASMIC_DOMAIN (PHOBIUS); TRANSMEMBRANE (PHOBIUS); TRANSMEMBRANE (PHOBIUS); TRANSMEMBRANE (PHOBIUS); NON_CYTOPLASMIC_DOMAIN (PHOBIUS); CYTOPLASMIC_DOMAIN (PHOBIUS); CYTOPLASMIC_DOMAIN (PHOBIUS); TRANSMEMBRANE (PHOBIUS); NON_CYTOPLASMIC_DOMAIN (PHOBIUS); TRANSMEMBRANE (PHOBIUS); IPR020067 (PROSITE_PROFILES)…
Aqu2.1.29354_001	uncharacterized protein loc102804514	604	20	0	0.638	2	P:GO:0008152; F:GO:0003824		SIGNAL_PEPTIDE_C_REGION (PHOBIUS); SIGNAL_PEPTIDE_N_REGION (PHOBIUS); SIGNAL_PEPTIDE (PHOBIUS); SIGNAL_PEPTIDE_H_REGION (PHOBIUS); NON_CYTOPLASMIC_DOMAIN (PHOBIUS); SignalP-noTM (SIGNALP_EUK); IPR017853 (SUPERFAMILY)
Aqu2.1.29366_001	tnf receptor-associated factor 4	494	20	2.12057e-119	0.433	2	C:GO:0005643; F:GO:0008270	-	Coil (COILS); PF02176 (PFAM); PTHR10131 (PANTHER); PTHR10131:SF52 (PANTHER); IPR001293 (PROSITE_PROFILES); IPR001293 (PROSITE_PROFILES)
Aqu2.1.29367_001	tnf receptor-associated factor 4	320	20	1.06131e-161	0.473	2	C:GO:0005643; F:GO:0008270	-	Coil (COILS); IPR013083 (G3DSA:3.30.40.GENE3D); PF02176 (PFAM); PTHR10131 (PANTHER); IPR001293 (PROSITE_PROFILES); IPR001293 (PROSITE_PROFILES); SignalP-TM (SIGNALP_GRAM_POSITIVE)
Aqu2.1.29373_001	staphylococcal nuclease domain-containing protein 1	975	20	0	0.688	7	C:GO:0043231; F:GO:0016788; F:GO:0003676; C:GO:0016442; P:GO:0090304; P:GO:0031047; C:GO:0005737	-	IPR016685 (PIRSF); IPR002999 (SMART); IPR016071 (SMART); IPR016071 (G3DSA:2.40.50.GENE3D); G3DSA:2.30.30.140 (GENE3D); IPR002999 (PFAM); IPR016071 (PFAM); IPR016071 (G3DSA:2.40.50.GENE3D); PTHR12302 (PANTHER); PTHR12302:SF0 (PANTHER); TRANSMEMBRANE (PHOBIUS); CYTOPLASMIC_DOMAIN (PHOBIUS); NON_CYTOPLASMIC_DOMAIN (PHOBIUS); IPR016071 (PROSITE_PROFILES); IPR016071 (PROSITE_PROFILES); IPR016071 (PROS…
Aqu2.1.29382_001	e3 ubiquitin-protein ligase mylip	547	20	0	0.513	7	P:GO:0044267; P:GO:0060255; P:GO:0044699; P:GO:0030163; F:GO:0008270; F:GO:0005515; C:GO:0005856	-	IPR019750 (PRINTS); IPR001841 (SMART); IPR019749 (SMART); IPR013083 (G3DSA:3.30.40.GENE3D); IPR014352 (G3DSA:1.20.80.GENE3D); IPR011993 (G3DSA:2.30.29.GENE3D); IPR018979 (PFAM); IPR019748 (PFAM); PF13920 (PFAM); IPR018980 (PFAM); G3DSA:3.10.20.90 (GENE3D); PTHR23280 (PANTHER); IPR001841 (PROSITE_PROFILES); IPR000299 (PROSITE_PROFILES); SSF57850 (SUPERFAMILY); SSF50729 (SUPERFAMILY); IPR019748 (SU…
Aqu2.1.29384_001	multiple inositol polyphosphate phosphatase 1-like	474	20	1.40574e-155	0.5035	1	F:GO:0003993		IPR016274 (PIRSF); G3DSA:3.40.50.1240 (GENE3D); IPR000560 (PFAM); PTHR20963 (PANTHER); PTHR20963:SF8 (PANTHER); SIGNAL_PEPTIDE_H_REGION (PHOBIUS); NON_CYTOPLASMIC_DOMAIN (PHOBIUS); SIGNAL_PEPTIDE_C_REGION (PHOBIUS); SIGNAL_PEPTIDE_N_REGION (PHOBIUS); SIGNAL_PEPTIDE (PHOBIUS); SignalP-noTM (SIGNALP_EUK); SSF53254 (SUPERFAMILY); TMhelix (TMHMM)
Aqu2.1.29386_001	tetratricopeptide repeat protein 7b-like	279	18	2.92045e-68	0.573889	2	F:GO:0016787; P:GO:0009117	-	SIGNAL_PEPTIDE_N_REGION (PHOBIUS); NON_CYTOPLASMIC_DOMAIN (PHOBIUS); SIGNAL_PEPTIDE_H_REGION (PHOBIUS); SIGNAL_PEPTIDE (PHOBIUS); SIGNAL_PEPTIDE_C_REGION (PHOBIUS); SignalP-TM (SIGNALP_GRAM_POSITIVE); SignalP-noTM (SIGNALP_GRAM_NEGATIVE); SignalP-noTM (SIGNALP_EUK)
Aqu2.1.29402_001	protein smg5	1090	20	1.69192e-79	0.452	1	F:GO:0005515		Coil (COILS); IPR019458 (PFAM); IPR018834 (PFAM); IPR011990 (G3DSA:1.25.40.GENE3D); IPR002716 (PFAM); PTHR15696 (PANTHER); TRANSMEMBRANE (PHOBIUS); CYTOPLASMIC_DOMAIN (PHOBIUS); NON_CYTOPLASMIC_DOMAIN (PHOBIUS); SSF48452 (SUPERFAMILY)
Aqu2.1.29403_001	---NA---	41	0			0	-		no IPS match
Aqu2.1.29404_001	---NA---	53	0			0	-		no IPS match
Aqu2.1.29417_001	receptor-type tyrosine-protein phosphatase s-like isoform x1	816	20	3.12741e-92	0.5915	1	F:GO:0005515		IPR003961 (SMART); IPR013783 (G3DSA:2.60.40.GENE3D); IPR013783 (G3DSA:2.60.40.GENE3D); IPR013783 (G3DSA:2.60.40.GENE3D); IPR003961 (PFAM); IPR013783 (G3DSA:2.60.40.GENE3D); PTHR10489 (PANTHER); TRANSMEMBRANE (PHOBIUS); SIGNAL_PEPTIDE_C_REGION (PHOBIUS); NON_CYTOPLASMIC_DOMAIN (PHOBIUS); SIGNAL_PEPTIDE_N_REGION (PHOBIUS); CYTOPLASMIC_DOMAIN (PHOBIUS); SIGNAL_PEPTIDE (PHOBIUS); SIGNAL_PEPTIDE_H_REG…
Aqu2.1.29423_001	myoferlin isoform x1	1729	20	0	0.561	1	F:GO:0005515		IPR000008 (SMART); IPR000008 (PFAM); G3DSA:2.60.40.150 (GENE3D); G3DSA:2.60.40.150 (GENE3D); G3DSA:2.60.40.150 (GENE3D); PTHR12546 (PANTHER); CYTOPLASMIC_DOMAIN (PHOBIUS); NON_CYTOPLASMIC_DOMAIN (PHOBIUS); TRANSMEMBRANE (PHOBIUS); IPR000008 (PROSITE_PROFILES); IPR000008 (PROSITE_PROFILES); IPR000008 (PROSITE_PROFILES); IPR000008 (PROSITE_PROFILES); IPR000008 (SUPERFAMILY); IPR000008 (SUPERFAMILY)…
Aqu2.1.29424_001	myoferlin-like isoform x2	1217	20	0	0.5635	1	F:GO:0005515		IPR000008 (SMART); IPR000008 (PFAM); G3DSA:2.60.40.150 (GENE3D); G3DSA:2.60.40.150 (GENE3D); G3DSA:2.60.40.150 (GENE3D); G3DSA:2.60.40.150 (GENE3D); G3DSA:2.60.40.150 (GENE3D); PTHR12546 (PANTHER); IPR000008 (PROSITE_PROFILES); IPR000008 (PROSITE_PROFILES); IPR000008 (PROSITE_PROFILES); IPR000008 (SUPERFAMILY); IPR000008 (SUPERFAMILY); IPR000008 (SUPERFAMILY); IPR000008 (SUPERFAMILY); IPR000008 (…
Aqu2.1.29439_001	uncharacterized protein loc100178935	464	4	3.59678e-41	0.545	1	F:GO:0005515		IPR003961 (SMART); IPR013783 (G3DSA:2.60.40.GENE3D); IPR013783 (G3DSA:2.60.40.GENE3D); IPR003961 (PFAM); CYTOPLASMIC_DOMAIN (PHOBIUS); TRANSMEMBRANE (PHOBIUS); NON_CYTOPLASMIC_DOMAIN (PHOBIUS); IPR003961 (PROSITE_PROFILES); IPR003961 (PROSITE_PROFILES); IPR003961 (SUPERFAMILY); TMhelix (TMHMM)
Aqu2.1.29460_001	dynein heavy chain axonemal- partial	336	18	1.34737e-85	0.552778	2	F:GO:0016787; P:GO:0009117	-	Coil (COILS); SIGNAL_PEPTIDE_C_REGION (PHOBIUS); SIGNAL_PEPTIDE_N_REGION (PHOBIUS); SIGNAL_PEPTIDE (PHOBIUS); SIGNAL_PEPTIDE_H_REGION (PHOBIUS); NON_CYTOPLASMIC_DOMAIN (PHOBIUS); SignalP-noTM (SIGNALP_GRAM_NEGATIVE); SignalP-noTM (SIGNALP_EUK)
Aqu2.1.29491_001	protein cip2a isoform 1	882	20	3.5463e-40	0.4425	2	C:GO:0016020; F:GO:0005488	-	Coil (COILS); Coil (COILS); Coil (COILS); PTHR23161 (PANTHER); PTHR23161:SF2 (PANTHER); NON_CYTOPLASMIC_DOMAIN (PHOBIUS); TRANSMEMBRANE (PHOBIUS); CYTOPLASMIC_DOMAIN (PHOBIUS); CYTOPLASMIC_DOMAIN (PHOBIUS); TRANSMEMBRANE (PHOBIUS); TRANSMEMBRANE (PHOBIUS); TRANSMEMBRANE (PHOBIUS); NON_CYTOPLASMIC_DOMAIN (PHOBIUS); NON_CYTOPLASMIC_DOMAIN (PHOBIUS); TRANSMEMBRANE (PHOBIUS); CYTOPLASMIC_DOMAIN (PHOB…
Aqu2.1.29513_001	FOXG1	473	20	0	0.7105	9	P:GO:0006355; P:GO:0060059; F:GO:0043565; F:GO:0003700; P:GO:0030182; C:GO:0005634; P:GO:0043584; C:GO:0005667; P:GO:0045449	-	IPR001766 (PRINTS); IPR001766 (SMART); IPR001766 (PFAM); IPR011991 (G3DSA:1.10.10.GENE3D); PTHR11829:SF79 (PANTHER); PTHR11829 (PANTHER); IPR018122 (PROSITE_PATTERNS); IPR018122 (PROSITE_PATTERNS); IPR001766 (PROSITE_PROFILES); SSF46785 (SUPERFAMILY)
Aqu2.1.29619_001	utp--glucose-1-phosphate uridylyltransferase	1022	20	0	0.752	16	F:GO:0003983; F:GO:0032557; C:GO:0005829; P:GO:0052695; P:GO:0006805; P:GO:0019255; F:GO:0005536; P:GO:0006011; F:GO:0005515; P:GO:0016310; P:GO:0006006; P:GO:0006065; P:GO:0005978; P:GO:0005982; P:GO:0005985; P:GO:0006012	EC:2.7.7.9	IPR002618 (PFAM); G3DSA:3.90.550.10 (GENE3D); IPR016267 (PTHR11952:PANTHER); IPR002618 (PANTHER); SSF53448 (SUPERFAMILY)
Aqu2.1.29638_001	---NA---	86	0			0	-		no IPS match
Aqu2.1.29658_001	---NA---	183	0			0	-		Coil (COILS)
Aqu2.1.29664_001	hydrocephalus-inducing protein homolog	212	18	9.85696e-51	0.566667	2	F:GO:0016787; P:GO:0009117	-	no IPS match
Aqu2.1.29720_001	deoxycytidylate deaminase	215	20	2.01617e-142	0.6555	3	F:GO:0016787; F:GO:0008270; P:GO:0008152	-	IPR002125 (PFAM); G3DSA:3.40.140.10 (GENE3D); PTHR11086:SF4 (PANTHER); IPR015517 (PANTHER); IPR016193 (SUPERFAMILY)
Aqu2.1.29757_001	conserved oligomeric golgi complex subunit 8- partial	250	2	4.57328e-10	0.725	1	C:GO:0017119	-	NON_CYTOPLASMIC_DOMAIN (PHOBIUS); CYTOPLASMIC_DOMAIN (PHOBIUS); TRANSMEMBRANE (PHOBIUS); TMhelix (TMHMM)
Aqu2.1.29786_001	---NA---	159	0			0	-		no IPS match
Aqu2.1.29796_001	---NA---	149	0			0	-		no IPS match
Aqu2.1.29829_001	protein kinase catalytic domain partial	280	20	3.89935e-07	0.5265	3	P:GO:0006468; F:GO:0004672; F:GO:0005524		Coil (COILS); G3DSA:1.10.510.10 (GENE3D); IPR000719 (PFAM); PTHR26266 (PANTHER); IPR000719 (PROSITE_PROFILES); SignalP-TM (SIGNALP_GRAM_POSITIVE); IPR011009 (SUPERFAMILY)
Aqu2.1.29830_001	---NA---	58	0			0	-		no IPS match
Aqu2.1.29836_001	---NA---	186	0			0	-		no IPS match
Aqu2.1.29853_001	probable e3 ubiquitin-protein ligase hectd4 isoform x1	3900	20	0	0.523	1	F:GO:0004842		Coil (COILS); Coil (COILS); IPR000569 (SMART); IPR000569 (PFAM); PTHR11254 (PANTHER); PTHR11254:SF213 (PANTHER); IPR000569 (PROSITE_PROFILES); IPR008985 (SUPERFAMILY); IPR000569 (SUPERFAMILY)
Aqu2.1.29859_001	gtp-binding protein 128up	367	20	0	0.9235	1	F:GO:0005525	-	Coil (COILS); IPR006073 (PRINTS); IPR004095 (PFAM); IPR005225 (TIGRFAM); IPR006073 (PFAM); G3DSA:3.40.50.300 (GENE3D); PTHR11702 (PANTHER); IPR006074 (PROSITE_PATTERNS); IPR012676 (SUPERFAMILY); IPR027417 (SUPERFAMILY)
Aqu2.1.29926_001	ubiquitin carboxyl-terminal hydrolase 25	1096	20	0	0.5695	4	P:GO:0006511; F:GO:0004221; F:GO:0008234; P:GO:0016579	EC:3.1.2.15	IPR003903 (SMART); IPR001394 (PFAM); PTHR24006:SF111 (PANTHER); PTHR24006 (PANTHER); IPR018200 (PROSITE_PATTERNS); IPR018200 (PROSITE_PATTERNS); IPR003903 (PROSITE_PROFILES); IPR028889 (PROSITE_PROFILES); SSF54001 (SUPERFAMILY)
Aqu2.1.29969_001	gram domain-containing protein 1b isoform x9	823	20	0	0.526	0	-		IPR004182 (SMART); IPR004182 (PFAM); PTHR23319:SF0 (PANTHER); PTHR23319 (PANTHER); TRANSMEMBRANE (PHOBIUS); NON_CYTOPLASMIC_DOMAIN (PHOBIUS); CYTOPLASMIC_DOMAIN (PHOBIUS)
Aqu2.1.29970_001	trk system potassium uptake protein amine-terminal domain protein	302	20	4.51815e-73	0.577	0	-		IPR008030 (PFAM); IPR016040 (G3DSA:3.40.50.GENE3D); PTHR14194:SF2 (PANTHER); PTHR14194 (PANTHER); SSF51735 (SUPERFAMILY)
Aqu2.1.29995_001	delta-like protein 1-like	376	3	5.08871e-05	0.45	3	P:GO:0007219; C:GO:0016021; P:GO:0007275		IPR011651 (PFAM); SIGNAL_PEPTIDE_N_REGION (PHOBIUS); TRANSMEMBRANE (PHOBIUS); SIGNAL_PEPTIDE_C_REGION (PHOBIUS); SIGNAL_PEPTIDE (PHOBIUS); CYTOPLASMIC_DOMAIN (PHOBIUS); NON_CYTOPLASMIC_DOMAIN (PHOBIUS); SIGNAL_PEPTIDE_H_REGION (PHOBIUS); SignalP-noTM (SIGNALP_EUK); TMhelix (TMHMM)
Aqu2.1.30002_001	PREDICTED: hypothetical protein LOC100631617 [Amphimedon queenslandica]	294	1	0	0.99	6	F:GO:0003700; F:GO:0003677; C:GO:0005634; P:GO:0006355; C:GO:0005667; P:GO:0045449	-	IPR012346 (G3DSA:2.60.40.GENE3D)
Aqu2.1.30029_001	28s ribosomal protein mitochondrial	197	20	1.36739e-25	0.555	3	F:GO:0003735; C:GO:0005840; P:GO:0006412	-	IPR001648 (TIGRFAM); IPR001648 (G3DSA:4.10.640.GENE3D); IPR001648 (PFAM); PTHR13329 (PANTHER); IPR001648 (SUPERFAMILY)
Aqu2.1.30115_001	---NA---	122	0			0	-		no IPS match
Aqu2.1.30128_001	---NA---	104	0			0	-		NON_CYTOPLASMIC_DOMAIN (PHOBIUS); TRANSMEMBRANE (PHOBIUS); CYTOPLASMIC_DOMAIN (PHOBIUS); TMhelix (TMHMM)
Aqu2.1.30132_001	protein	209	20	1.13311e-145	0.664	3	F:GO:0003723; P:GO:0006278; F:GO:0003964		no IPS match
Aqu2.1.30168_001	hepatocyte growth factor receptor-like	2790	20	0	0.7835	6	F:GO:0004713; P:GO:0018108; F:GO:0005524; P:GO:0007218; F:GO:0004930; C:GO:0016021	EC:2.7.10.0	IPR001245 (PRINTS); IPR002290 (SMART); IPR020635 (SMART); IPR000203 (SMART); G3DSA:1.10.510.10 (GENE3D); G3DSA:3.30.200.20 (GENE3D); IPR001245 (PFAM); IPR001879 (PFAM); IPR000203 (PFAM); IPR003644 (PFAM); PTHR12011 (PANTHER); IPR017441 (PROSITE_PATTERNS); IPR008266 (PROSITE_PATTERNS); TRANSMEMBRANE (PHOBIUS); TRANSMEMBRANE (PHOBIUS); CYTOPLASMIC_DOMAIN (PHOBIUS); TRANSMEMBRANE (PHOBIUS); TRANSMEM…
Aqu2.1.30169_001	---NA---	46	0			0	-		no IPS match
Aqu2.1.30170_001	isoform a	224	20	3.20107e-131	0.513	5	P:GO:0050896; P:GO:0008038; P:GO:0031175; F:GO:0005509; F:GO:0005515	-	IPR003599 (SMART); IPR001881 (SMART); IPR000742 (SMART); IPR003598 (SMART); IPR000742 (PFAM); IPR013098 (PFAM); G3DSA:2.10.25.10 (GENE3D); IPR013783 (G3DSA:2.60.40.GENE3D); PTHR10489:SF478 (PANTHER); PTHR10489 (PANTHER); IPR013032 (PROSITE_PATTERNS); IPR000742 (PROSITE_PROFILES); IPR007110 (PROSITE_PROFILES); SSF57196 (SUPERFAMILY); SSF48726 (SUPERFAMILY)
Aqu2.1.30171_001	atp-dependent dna helicase	138	20	1.14503e-22	0.5935	4	P:GO:0044237; F:GO:0008026; F:GO:0003676; F:GO:0005524	-	IPR011545 (PFAM); G3DSA:3.40.50.300 (GENE3D); PTHR13710:SF14 (PANTHER); PTHR13710 (PANTHER); IPR027417 (SUPERFAMILY)
Aqu2.1.30182_001	tripartite motif-containing protein 71-like	855	20	0	0.6115	3	F:GO:0008270; C:GO:0005622; F:GO:0005515		Coil (COILS); IPR000315 (SMART); IPR001841 (SMART); IPR003649 (SMART); IPR001258 (PFAM); IPR013083 (G3DSA:3.30.40.GENE3D); IPR011042 (G3DSA:2.120.10.GENE3D); IPR000315 (G3DSA:4.10.45.GENE3D); PF15227 (PFAM); IPR000315 (PFAM); PTHR24103:SF134 (PANTHER); PTHR24103 (PANTHER); IPR017907 (PROSITE_PATTERNS); IPR013017 (PROSITE_PROFILES); IPR013017 (PROSITE_PROFILES); IPR013017 (PROSITE_PROFILES); IPR01…
Aqu2.1.30183_001	phosphatidylinositide phosphatase sac1-like	99	20	4.91648e-39	0.6385	1	F:GO:0042578	-	no IPS match
Aqu2.1.30191_001	protein vac14 homolog	65	20	3.16169e-08	0.66	5	P:GO:0019222; C:GO:0005768; C:GO:0031090; P:GO:0009987; C:GO:0044446	-	IPR021841 (PFAM)
Aqu2.1.30200_001	tripartite motif-containing protein 71-like	312	20	2.40616e-85	0.6365	2	F:GO:0008270; C:GO:0005622		Coil (COILS); IPR000315 (SMART); IPR003649 (SMART); IPR000315 (G3DSA:4.10.45.GENE3D); IPR000315 (PFAM); PTHR24103 (PANTHER); IPR000315 (PROSITE_PROFILES); SSF57845 (SUPERFAMILY)
Aqu2.1.30205_001	sacsin-like	74	10	2.76267e-23	0.673	1	F:GO:0005524	-	G3DSA:1.20.120.330 (GENE3D)
Aqu2.1.30237_001	wd repeat-containing protein 63- partial	933	20	7.62051e-180	0.6125	3	P:GO:0009987; F:GO:0016772; F:GO:0005515	-	Coil (COILS); Coil (COILS); Coil (COILS); IPR015915 (G3DSA:2.120.10.GENE3D); IPR011043 (SUPERFAMILY)
Aqu2.1.30239_001	ubiquitin carboxyl-terminal hydrolase 47-like	245	20	2.16009e-88	0.6455	15	P:GO:0030307; P:GO:0043066; F:GO:0071987; P:GO:1902230; P:GO:0045892; C:GO:0005737; C:GO:0019005; P:GO:0043154; F:GO:0004843; P:GO:0035520; P:GO:0006284; P:GO:0042493; P:GO:0034644; P:GO:0010972; P:GO:0006508	-	Coil (COILS); PTHR24619 (PANTHER); PTHR24619:SF57 (PANTHER)
Aqu2.1.30241_001	histone-lysine n-methyltransferase prdm9-like	323	20	3.67841e-43	0.4615	12	P:GO:0007283; P:GO:0018022; P:GO:0060903; F:GO:0043565; P:GO:0051568; P:GO:0010845; F:GO:0042800; P:GO:0045944; F:GO:0010844; C:GO:0005634; F:GO:0046872; F:GO:0005515	-	IPR015880 (SMART); IPR013087 (G3DSA:3.30.160.GENE3D); IPR013087 (G3DSA:3.30.160.GENE3D); IPR007087 (PFAM); G3DSA:2.170.270.10 (GENE3D); PF12874 (PFAM); PTHR16515 (PANTHER); IPR007087 (PROSITE_PATTERNS); IPR001214 (PROSITE_PROFILES); IPR007087 (PROSITE_PROFILES); IPR007087 (PROSITE_PROFILES); SSF57667 (SUPERFAMILY); SSF82199 (SUPERFAMILY)
Aqu2.1.30258_001	uncharacterized protein loc103135707 isoform x2	1100	20	1.49554e-101	0.4725	3	F:GO:0004842; P:GO:0016567; C:GO:0000151		Coil (COILS); Coil (COILS); IPR003613 (SMART); IPR002035 (SMART); SM00212 (SMART); IPR016135 (G3DSA:3.10.110.GENE3D); IPR013083 (G3DSA:3.30.40.GENE3D); PF13519 (PFAM); IPR000608 (PFAM); IPR003613 (PFAM); IPR002035 (G3DSA:3.40.50.GENE3D); PTHR24067 (PANTHER); PTHR24067:SF31 (PANTHER); IPR000608 (PROSITE_PROFILES); IPR002035 (PROSITE_PROFILES); SSF57850 (SUPERFAMILY); SSF53300 (SUPERFAMILY); IPR016…
Aqu2.1.30274_001	jerky protein homolog-like	810	20	0	0.6275	3	F:GO:0003677; F:GO:0008270; F:GO:0005515	-	Coil (COILS); IPR001965 (SMART); IPR013083 (G3DSA:3.30.40.GENE3D); IPR007889 (PFAM); IPR004875 (PFAM); PTHR19303 (PANTHER); PTHR19303:SF64 (PANTHER); IPR006600 (PROSITE_PROFILES); IPR011011 (SUPERFAMILY); IPR009057 (SUPERFAMILY)
Aqu2.1.30281_001	transmembrane protein 14c-like	104	20	4.9567e-65	0.676	2	F:GO:0008270; C:GO:0016020	-	IPR005349 (PFAM); IPR005349 (PANTHER); CYTOPLASMIC_DOMAIN (PHOBIUS); TRANSMEMBRANE (PHOBIUS); TRANSMEMBRANE (PHOBIUS); NON_CYTOPLASMIC_DOMAIN (PHOBIUS); CYTOPLASMIC_DOMAIN (PHOBIUS); CYTOPLASMIC_DOMAIN (PHOBIUS); TRANSMEMBRANE (PHOBIUS); TRANSMEMBRANE (PHOBIUS); NON_CYTOPLASMIC_DOMAIN (PHOBIUS); TMhelix (TMHMM); TMhelix (TMHMM); TMhelix (TMHMM); TMhelix (TMHMM)
Aqu2.1.30282_001	SOX	400	20	0	0.8065	35	P:GO:0045892; F:GO:0000979; P:GO:0072034; P:GO:0060018; C:GO:0044798; P:GO:0001701; P:GO:0048484; P:GO:0035914; F:GO:0008134; P:GO:0007283; P:GO:0010817; P:GO:0072289; P:GO:0048709; P:GO:0090190; P:GO:0007165; P:GO:0014015; P:GO:0045944; P:GO:0045444; P:GO:0001649; P:GO:0046533; C:GO:0005737; P:GO:0060612; P:GO:0045662; P:GO:0055114; F:GO:0046982; P:GO:0060009; P:GO:0007422; F:GO:0000981; P:GO:00…	EC:1.3.1.74	IPR009071 (SMART); IPR009071 (PFAM); IPR009071 (G3DSA:1.10.30.GENE3D); PTHR10270 (PANTHER); IPR009071 (PROSITE_PROFILES); IPR009071 (SUPERFAMILY)
Aqu2.1.30283_001	low quality protein: ethanolaminephosphotransferase 1-like	437	20	0	0.582	3	C:GO:0016020; F:GO:0016780; P:GO:0008654	EC:2.7.8.0	IPR014472 (PIRSF); IPR000462 (PFAM); IPR014472 (PANTHER); PTHR10414:SF18 (PANTHER); IPR000462 (PROSITE_PATTERNS); TRANSMEMBRANE (PHOBIUS); TRANSMEMBRANE (PHOBIUS); CYTOPLASMIC_DOMAIN (PHOBIUS); TRANSMEMBRANE (PHOBIUS); NON_CYTOPLASMIC_DOMAIN (PHOBIUS); TRANSMEMBRANE (PHOBIUS); NON_CYTOPLASMIC_DOMAIN (PHOBIUS); CYTOPLASMIC_DOMAIN (PHOBIUS); TRANSMEMBRANE (PHOBIUS); CYTOPLASMIC_DOMAIN (PHOBIUS); TR…
Aqu2.1.30286_001	---NA---	93	0			0	-		no IPS match
Aqu2.1.30288_001	tyrosine-protein kinase src42a	522	20	0	0.781	20	F:GO:0004871; P:GO:0042059; F:GO:0004715; P:GO:0045886; P:GO:0034332; P:GO:0007424; P:GO:0051017; P:GO:0007395; P:GO:0090136; F:GO:0046983; P:GO:0006099; P:GO:0007254; P:GO:0046529; P:GO:0018108; P:GO:0048749; C:GO:0005912; P:GO:0043277; F:GO:0005524; P:GO:0007476; P:GO:0007435	EC:2.7.10.2	IPR001245 (PRINTS); IPR000980 (PRINTS); IPR001452 (PRINTS); IPR020635 (SMART); IPR000980 (SMART); IPR001452 (SMART); IPR000980 (G3DSA:3.30.505.GENE3D); IPR000980 (PFAM); IPR001245 (PFAM); G3DSA:1.10.510.10 (GENE3D); IPR001452 (PFAM); G3DSA:2.30.30.40 (GENE3D); G3DSA:3.30.200.20 (GENE3D); PTHR24418 (PANTHER); IPR017441 (PROSITE_PATTERNS); IPR008266 (PROSITE_PATTERNS); IPR000719 (PROSITE_PROFILES);…
Aqu2.1.30292_001	coatomer subunit beta	884	20	0	0.8525	6	F:GO:0005080; C:GO:0030126; P:GO:0006891; C:GO:0015629; P:GO:0006886; F:GO:0005198	-	IPR020472 (PRINTS); IPR001680 (SMART); IPR016453 (PIRSF); IPR001680 (PFAM); IPR015943 (G3DSA:2.130.10.GENE3D); IPR006692 (PFAM); PTHR19876:SF2 (PANTHER); PTHR19876 (PANTHER); IPR001680 (PROSITE_PROFILES); IPR017986 (PROSITE_PROFILES); IPR011044 (SUPERFAMILY); IPR017986 (SUPERFAMILY)
Aqu2.1.30293_001	myb-binding protein 1a-like	1063	20	1.59537e-133	0.439	7	P:GO:0016192; C:GO:0030117; P:GO:0006886; F:GO:0005198; P:GO:0006351; F:GO:0003887; F:GO:0003677	-	Coil (COILS); IPR007015 (PFAM); IPR007015 (PANTHER); IPR016024 (SUPERFAMILY)
Aqu2.1.30306_001	ctd nuclear envelope phosphatase 1	313	20	0	0.749	11	P:GO:0006470; P:GO:0006998; C:GO:0031965; C:GO:0071595; P:GO:0010867; F:GO:0003677; P:GO:0034504; F:GO:0004722; F:GO:0005515; P:GO:0007275; C:GO:0005789	-	IPR004274 (SMART); IPR011948 (TIGRFAM); IPR023214 (G3DSA:3.40.50.GENE3D); IPR004274 (PFAM); PTHR12210:SF7 (PANTHER); PTHR12210 (PANTHER); IPR004274 (PROSITE_PROFILES); IPR023214 (SUPERFAMILY)
Aqu2.1.30307_001	calmodulin-binding transcription activator 1-like	955	20	0	0.647	2	C:GO:0005634; F:GO:0003677	-	IPR005559 (SMART); IPR005559 (PFAM); PTHR23335 (PANTHER); IPR005559 (PROSITE_PROFILES)
Aqu2.1.30347_001	---NA---	57	0			0	-		NON_CYTOPLASMIC_DOMAIN (PHOBIUS); TRANSMEMBRANE (PHOBIUS); CYTOPLASMIC_DOMAIN (PHOBIUS)
Aqu2.1.30403_001	tetratricopeptide repeat protein 7b-like	519	20	6.7962e-55	0.566	5	P:GO:0009199; P:GO:0009119; F:GO:0016787; P:GO:0009165; P:GO:0009259	-	IPR002181 (SUPERFAMILY)
Aqu2.1.30420_001	uncharacterized protein loc100680066 isoform x1	360	20	9.45748e-21	0.4655	3	P:GO:0006351; F:GO:0003899; F:GO:0003677		Coil (COILS)
Aqu2.1.30428_001	protein cwc15 homolog a-like	231	20	2.06956e-126	0.751	3	C:GO:0005681; F:GO:0003723; P:GO:0000398	-	Coil (COILS); IPR006973 (PFAM); IPR006973 (PANTHER)
Aqu2.1.30433_001	---NA---	58	0			0	-		Coil (COILS)
Aqu2.1.30435_001	glypican-1	677	20	0	0.413	4	C:GO:0016020; F:GO:0043395; C:GO:0005578; P:GO:0009987	-	Coil (COILS); Coil (COILS); IPR001863 (PFAM); PTHR10822:SF2 (PANTHER); IPR001863 (PANTHER); CYTOPLASMIC_DOMAIN (PHOBIUS); NON_CYTOPLASMIC_DOMAIN (PHOBIUS); SIGNAL_PEPTIDE_H_REGION (PHOBIUS); SIGNAL_PEPTIDE_N_REGION (PHOBIUS); TRANSMEMBRANE (PHOBIUS); SIGNAL_PEPTIDE_C_REGION (PHOBIUS); SIGNAL_PEPTIDE (PHOBIUS); SignalP-noTM (SIGNALP_EUK); SignalP-noTM (SIGNALP_GRAM_NEGATIVE); TMhelix (TMHMM)
Aqu2.1.30437_001	centrosomal protein of 135 kda-like	835	20	1.91528e-171	0.5065	4	F:GO:0008233; C:GO:0044424; F:GO:0005515; P:GO:0042981	-	PF05729 (PFAM); IPR011029 (G3DSA:1.10.533.GENE3D); G3DSA:3.40.50.300 (GENE3D); PTHR24106 (PANTHER); CYTOPLASMIC_DOMAIN (PHOBIUS); NON_CYTOPLASMIC_DOMAIN (PHOBIUS); TRANSMEMBRANE (PHOBIUS); IPR001315 (PROSITE_PROFILES); IPR007111 (PROSITE_PROFILES); IPR027417 (SUPERFAMILY); TMhelix (TMHMM)
Aqu2.1.30440_001	PREDICTED: hypothetical protein LOC100638610 [Amphimedon queenslandica]	1022	4	4.76671e-40	0.4125	0	-		Coil (COILS); IPR006626 (SMART); SIGNAL_PEPTIDE_C_REGION (PHOBIUS); SIGNAL_PEPTIDE_N_REGION (PHOBIUS); SIGNAL_PEPTIDE (PHOBIUS); SIGNAL_PEPTIDE_H_REGION (PHOBIUS); NON_CYTOPLASMIC_DOMAIN (PHOBIUS); SignalP-noTM (SIGNALP_EUK)
Aqu2.1.30447_001	protein arginine n-methyltransferase 3- partial	1130	20	1.57396e-168	0.6135	4	P:GO:0009987; F:GO:1901363; F:GO:0097159; F:GO:0005515	-	Coil (COILS); Coil (COILS); Coil (COILS); IPR015915 (G3DSA:2.120.10.GENE3D); PTHR23244 (PANTHER); IPR011043 (SUPERFAMILY)
Aqu2.1.30448_001	multidrug resistance-associated protein 4 isoform x1	1040	20	0	0.6145	5	C:GO:0044464; P:GO:0055085; F:GO:0042626; F:GO:0005524; C:GO:0016021	-	IPR003593 (SMART); IPR001140 (PFAM); IPR003439 (PFAM); G3DSA:1.20.1560.10 (GENE3D); G3DSA:3.40.50.300 (GENE3D); PTHR24223 (PANTHER); IPR017871 (PROSITE_PATTERNS); CYTOPLASMIC_DOMAIN (PHOBIUS); TRANSMEMBRANE (PHOBIUS); NON_CYTOPLASMIC_DOMAIN (PHOBIUS); TRANSMEMBRANE (PHOBIUS); NON_CYTOPLASMIC_DOMAIN (PHOBIUS); TRANSMEMBRANE (PHOBIUS); NON_CYTOPLASMIC_DOMAIN (PHOBIUS); TRANSMEMBRANE (PHOBIUS); CYTO…
Aqu2.1.30449_001	multidrug resistance-associated protein 4-like	166	20	4.4724e-28	0.7215	4	P:GO:0006810; P:GO:0006200; F:GO:0005524; F:GO:0016887	EC:3.6.1.3	G3DSA:3.40.50.300 (GENE3D); PTHR24223 (PANTHER); IPR027417 (SUPERFAMILY)
Aqu2.1.30450_001	gag-pol fusion protein	308	20	4.20525e-63	0.567	2	P:GO:0015074; F:GO:0003676	-	IPR001584 (PFAM); G3DSA:3.30.420.10 (GENE3D); PTHR10178 (PANTHER); PTHR10178:SF26 (PANTHER); IPR001584 (PROSITE_PROFILES); IPR012337 (SUPERFAMILY)
Aqu2.1.30454_001	---NA---	22	0			0	-		SIGNAL_PEPTIDE_C_REGION (PHOBIUS); SIGNAL_PEPTIDE_H_REGION (PHOBIUS); NON_CYTOPLASMIC_DOMAIN (PHOBIUS); SIGNAL_PEPTIDE_N_REGION (PHOBIUS); SIGNAL_PEPTIDE (PHOBIUS); SignalP-noTM (SIGNALP_EUK)
Aqu2.1.30455_001	sid1 transmembrane family member 1 isoform x2	767	20	0	0.5695	3	P:GO:0033227; C:GO:0016021; F:GO:0051033		Coil (COILS); IPR025958 (PFAM); IPR025958 (PANTHER); PTHR32543:SF3 (PANTHER); TRANSMEMBRANE (PHOBIUS); TRANSMEMBRANE (PHOBIUS); TRANSMEMBRANE (PHOBIUS); TRANSMEMBRANE (PHOBIUS); TRANSMEMBRANE (PHOBIUS); NON_CYTOPLASMIC_DOMAIN (PHOBIUS); CYTOPLASMIC_DOMAIN (PHOBIUS); NON_CYTOPLASMIC_DOMAIN (PHOBIUS); NON_CYTOPLASMIC_DOMAIN (PHOBIUS); TRANSMEMBRANE (PHOBIUS); SIGNAL_PEPTIDE_N_REGION (PHOBIUS); NON_…
Aqu2.1.30458_001	transmembrane protein 205	176	20	5.82169e-17	0.5865	3	C:GO:0016020; C:GO:0044444; C:GO:0043231	-	IPR025423 (PFAM); PTHR23241 (PANTHER); TRANSMEMBRANE (PHOBIUS); CYTOPLASMIC_DOMAIN (PHOBIUS); NON_CYTOPLASMIC_DOMAIN (PHOBIUS); TRANSMEMBRANE (PHOBIUS); NON_CYTOPLASMIC_DOMAIN (PHOBIUS); TRANSMEMBRANE (PHOBIUS); CYTOPLASMIC_DOMAIN (PHOBIUS); TMhelix (TMHMM); TMhelix (TMHMM); TMhelix (TMHMM)
Aqu2.1.30486_001	TFAP4	329	20	0	0.6225	8	P:GO:0044763; P:GO:0010605; P:GO:2001141; P:GO:0010468; F:GO:0046983; F:GO:0003677; P:GO:0048522; P:GO:0031324	-	Coil (COILS); IPR011598 (SMART); IPR011598 (G3DSA:4.10.280.GENE3D); IPR011598 (PFAM); PTHR15741 (PANTHER); IPR011598 (PROSITE_PROFILES); IPR011598 (SUPERFAMILY)
Aqu2.1.30490_001	---NA---	41	0			0	-		no IPS match
Aqu2.1.30507_001	heat shock cognate 71 kda protein	597	20	0	0.8755	29	C:GO:0009986; P:GO:0045892; C:GO:0070062; P:GO:0006892; P:GO:0019048; C:GO:0005681; F:GO:0051082; C:GO:0043005; C:GO:0061202; P:GO:0007411; F:GO:0005102; C:GO:0005829; C:GO:0000974; P:GO:0051726; P:GO:0051085; P:GO:0006200; P:GO:0008380; P:GO:0006986; C:GO:0005886; F:GO:0042623; F:GO:0005524; C:GO:0042470; F:GO:0043531; P:GO:0006397; C:GO:0005730; C:GO:0043025; P:GO:0007269; C:GO:0008021; P:GO:00…	-	Coil (COILS); IPR013126 (PRINTS); G3DSA:3.30.30.30 (GENE3D); G3DSA:2.60.34.10 (GENE3D); G3DSA:3.30.420.40 (GENE3D); IPR013126 (PFAM); G3DSA:3.90.640.10 (GENE3D); PTHR19375:SF130 (PANTHER); PTHR19375 (PANTHER); IPR018181 (PROSITE_PATTERNS); SSF53067 (SUPERFAMILY); SSF100920 (SUPERFAMILY)
Aqu2.1.30510_001	elongation factor 2	257	20	4.64015e-63	0.4885	3	F:GO:0004674; F:GO:0005524; P:GO:0006468		IPR004166 (SMART); IPR004166 (PFAM); PTHR14187:SF29 (PANTHER); PTHR14187 (PANTHER); IPR004166 (PROSITE_PROFILES); IPR011009 (SUPERFAMILY)
Aqu2.1.30556_001	thromboxane-a synthase	1472	20	0	0.595	4	F:GO:0020037; P:GO:0055114; F:GO:0005506; F:GO:0016705	-	IPR001128 (PRINTS); IPR002401 (PRINTS); IPR001128 (G3DSA:1.10.630.GENE3D); IPR001128 (PFAM); PTHR24292:SF24 (PANTHER); PTHR24292 (PANTHER); IPR017972 (PROSITE_PATTERNS); SIGNAL_PEPTIDE_H_REGION (PHOBIUS); SIGNAL_PEPTIDE_N_REGION (PHOBIUS); SIGNAL_PEPTIDE (PHOBIUS); SIGNAL_PEPTIDE_C_REGION (PHOBIUS); NON_CYTOPLASMIC_DOMAIN (PHOBIUS); IPR001128 (SUPERFAMILY); TMhelix (TMHMM)
Aqu2.1.30578_001	dna repair and recombination protein rad26-like	752	20	0	0.6815	3	F:GO:0004386; F:GO:0005524; F:GO:0003677	-	IPR014001 (SMART); IPR001650 (SMART); G3DSA:3.40.50.300 (GENE3D); G3DSA:3.40.50.300 (GENE3D); IPR001650 (PFAM); IPR000330 (PFAM); PTHR10799 (PANTHER); PTHR10799:SF65 (PANTHER); IPR014001 (PROSITE_PROFILES); IPR001650 (PROSITE_PROFILES); IPR027417 (SUPERFAMILY); IPR027417 (SUPERFAMILY)
Aqu2.1.30582_001	connector enhancer of kinase suppressor of ras 1	592	20	0	0.521	2	F:GO:0005543; F:GO:0005515	-	IPR001660 (SMART); IPR001478 (SMART); IPR001849 (SMART); IPR011993 (G3DSA:2.30.29.GENE3D); IPR013761 (G3DSA:1.10.150.GENE3D); G3DSA:2.30.42.10 (GENE3D); IPR001849 (PFAM); IPR021129 (PFAM); IPR001478 (PFAM); PTHR12844:SF9 (PANTHER); PTHR12844 (PANTHER); IPR001660 (PROSITE_PROFILES); IPR017874 (PROSITE_PROFILES); IPR001478 (PROSITE_PROFILES); IPR001849 (PROSITE_PROFILES); IPR013761 (SUPERFAMILY); S…
Aqu2.1.30594_001	PREDICTED: hypothetical protein LOC100632884 [Amphimedon queenslandica]	405	1	1.75887e-20	0.44	0	-		IPR018379 (PFAM)
Aqu2.1.30613_001	zinc finger bed domain-containing protein 1-like	466	20	1.37136e-38	0.5305	2	F:GO:0003677; F:GO:0046983		IPR003656 (SMART); IPR008906 (PFAM); IPR003656 (PFAM); PTHR23272 (PANTHER); IPR003656 (PROSITE_PROFILES); SSF57667 (SUPERFAMILY); IPR012337 (SUPERFAMILY)
Aqu2.1.30625_001	uncharacterized protein partial	143	20	8.67429e-25	0.581	1	F:GO:0005488	-	no IPS match
Aqu2.1.30644_001	ras guanine nucleotide exchange factor	1092	20	0	0.71	6	P:GO:0044281; P:GO:0044237; F:GO:0005085; C:GO:0005622; P:GO:0051056; F:GO:0005515	-	Coil (COILS); IPR001895 (SMART); IPR000651 (SMART); IPR011029 (G3DSA:1.10.533.GENE3D); IPR000488 (PFAM); IPR001895 (G3DSA:1.10.840.GENE3D); IPR001895 (PFAM); IPR000651 (PFAM); G3DSA:1.20.870.10 (GENE3D); PTHR23113:SF87 (PANTHER); IPR008937 (PANTHER); IPR001895 (PROSITE_PROFILES); IPR000651 (PROSITE_PROFILES); IPR000488 (PROSITE_PROFILES); IPR023578 (SUPERFAMILY); IPR011029 (SUPERFAMILY)
Aqu2.1.30645_001	tripartite motif-containing protein 3 isoform x2	625	20	7.90146e-169	0.5125	3	C:GO:0005622; F:GO:0008270; F:GO:0005515		Coil (COILS); Coil (COILS); IPR003649 (SMART); IPR001841 (SMART); IPR000315 (G3DSA:4.10.45.GENE3D); IPR001258 (PFAM); IPR011042 (G3DSA:2.120.10.GENE3D); IPR001841 (PFAM); IPR013083 (G3DSA:3.30.40.GENE3D); IPR000315 (PFAM); PTHR24103 (PANTHER); PTHR24103:SF134 (PANTHER); IPR017907 (PROSITE_PATTERNS); IPR013017 (PROSITE_PROFILES); IPR013017 (PROSITE_PROFILES); IPR000315 (PROSITE_PROFILES); IPR01301…
Aqu2.1.30674_001	jerky protein homolog-like	427	20	0	0.8	1	F:GO:0003677	-	IPR004875 (PFAM); IPR007889 (PFAM); PTHR19303 (PANTHER); PTHR19303:SF64 (PANTHER); IPR009057 (SUPERFAMILY)
Aqu2.1.30675_001	atp-dependent dna helicase pif1	69	20	1.72685e-19	0.6505	7	F:GO:0004386; F:GO:0003676; P:GO:0006281; F:GO:0004523; P:GO:0032508; F:GO:0003678; P:GO:0000723		no IPS match
Aqu2.1.30684_001	---NA---	131	0			0	-		Coil (COILS)
Aqu2.1.30707_001	wd repeat-containing protein 63- partial	522	20	0	0.573	1	P:GO:0007165	-	IPR011029 (G3DSA:1.10.533.GENE3D); IPR011029 (SUPERFAMILY)
Aqu2.1.30721_001	serine threonine-protein phosphatase 6 regulatory ankyrin repeat subunit c-like	1181	20	0	0.475	1	F:GO:0005515		IPR002110 (SMART); IPR020683 (G3DSA:1.25.40.GENE3D); IPR020683 (PFAM); IPR020683 (G3DSA:1.25.40.GENE3D); IPR020683 (G3DSA:1.25.40.GENE3D); PF13637 (PFAM); PF13857 (PFAM); IPR020683 (G3DSA:1.25.40.GENE3D); IPR020683 (G3DSA:1.25.40.GENE3D); PTHR24133 (PANTHER); PTHR24133:SF3 (PANTHER); IPR020683 (PROSITE_PROFILES); IPR002110 (PROSITE_PROFILES); IPR002110 (PROSITE_PROFILES); IPR002110 (PROSITE_PROFI…
Aqu2.1.30727_001	non-structural maintenance of chromosomes element 1 homolog	281	20	0	0.5295	2	P:GO:0006281; C:GO:0030915	-	IPR011513 (PFAM); IPR011513 (PANTHER); PTHR20973:SF0 (PANTHER); SSF57850 (SUPERFAMILY)
Aqu2.1.30729_001	lyzozyme m1 ( -beta-n-acetylmuramidase)	702	14	1.19765e-27	0.638571	1	F:GO:0005515		IPR003961 (SMART); IPR013783 (G3DSA:2.60.40.GENE3D); IPR003961 (PFAM); PTHR10489 (PANTHER); NON_CYTOPLASMIC_DOMAIN (PHOBIUS); TRANSMEMBRANE (PHOBIUS); NON_CYTOPLASMIC_DOMAIN (PHOBIUS); CYTOPLASMIC_DOMAIN (PHOBIUS); TRANSMEMBRANE (PHOBIUS); IPR003961 (PROSITE_PROFILES); IPR003961 (PROSITE_PROFILES); IPR003961 (SUPERFAMILY); TMhelix (TMHMM); TMhelix (TMHMM)
Aqu2.1.30734_001	receptor-type tyrosine-protein phosphatase f-like	860	19	1.65716e-133	0.604211	1	F:GO:0005515		IPR003961 (SMART); IPR013783 (G3DSA:2.60.40.GENE3D); IPR003961 (PFAM); IPR013783 (G3DSA:2.60.40.GENE3D); IPR013783 (G3DSA:2.60.40.GENE3D); PTHR10489 (PANTHER); PTHR10489:SF336 (PANTHER); SIGNAL_PEPTIDE_C_REGION (PHOBIUS); SIGNAL_PEPTIDE_N_REGION (PHOBIUS); SIGNAL_PEPTIDE_H_REGION (PHOBIUS); SIGNAL_PEPTIDE (PHOBIUS); NON_CYTOPLASMIC_DOMAIN (PHOBIUS); IPR003961 (PROSITE_PROFILES); IPR003961 (PROSIT…
Aqu2.1.30735_001	---NA---	1272	0			2	F:GO:0008270; C:GO:0005634		Coil (COILS); IPR001876 (SMART); G3DSA:3.90.10.10 (GENE3D); IPR003380 (G3DSA:3.10.260.GENE3D)
Aqu2.1.30737_001	map kinase-activated protein kinase 2	364	20	0	0.7805	11	F:GO:0004683; P:GO:0010033; P:GO:0006974; C:GO:0044424; P:GO:0001817; P:GO:0048255; P:GO:0006468; P:GO:0007165; P:GO:0006952; F:GO:0005524; P:GO:0009069	EC:2.7.11.17	IPR002290 (SMART); G3DSA:3.30.200.20 (GENE3D); G3DSA:1.10.510.10 (GENE3D); IPR027442 (G3DSA:4.10.1170.GENE3D); IPR000719 (PFAM); PTHR24349:SF41 (PANTHER); PTHR24349 (PANTHER); IPR017441 (PROSITE_PATTERNS); IPR008271 (PROSITE_PATTERNS); IPR000719 (PROSITE_PROFILES); IPR011009 (SUPERFAMILY)
Aqu2.1.30806_001	iq and aaa domain-containing protein 1	169	20	5.96381e-46	0.6315	3	F:GO:0005524; F:GO:0000166; F:GO:0017111		IPR002181 (SMART); G3DSA:3.40.50.300 (GENE3D); IPR014716 (G3DSA:3.90.215.GENE3D); IPR002181 (PFAM); PTHR14690 (PANTHER); PTHR14690:SF1 (PANTHER); IPR002181 (PROSITE_PROFILES); IPR002181 (SUPERFAMILY)
Aqu2.1.30820_001	copper-translocating p-type atpase	101	20	7.71951e-19	0.611	2	F:GO:0000166; F:GO:0046872		IPR008250 (G3DSA:2.70.150.GENE3D); IPR008250 (PFAM); SSF81653 (SUPERFAMILY)
Aqu2.1.30831_001	unconventional myosin-if-like	753	20	0	0.844	18	C:GO:0005911; P:GO:0072015; P:GO:0035166; F:GO:0035091; P:GO:0032836; F:GO:0003774; P:GO:0006897; F:GO:0051015; P:GO:0048008; C:GO:0005912; P:GO:0003094; F:GO:0042623; F:GO:0005516; F:GO:0005524; P:GO:0001701; C:GO:0016459; P:GO:0001570; C:GO:0045334	-	IPR001609 (PRINTS); IPR001609 (SMART); IPR010926 (PFAM); G3DSA:3.40.50.300 (GENE3D); IPR001609 (PFAM); PTHR13140 (PANTHER); IPR027417 (SUPERFAMILY)
Aqu2.1.30860_001	---NA---	172	0			0	-		NON_CYTOPLASMIC_DOMAIN (PHOBIUS); TRANSMEMBRANE (PHOBIUS); CYTOPLASMIC_DOMAIN (PHOBIUS); TRANSMEMBRANE (PHOBIUS); NON_CYTOPLASMIC_DOMAIN (PHOBIUS); TMhelix (TMHMM); TMhelix (TMHMM); TMhelix (TMHMM)
Aqu2.1.30862_001	armadillo repeat-containing protein 1-like	278	20	0	0.653	3	P:GO:0030001; F:GO:0046872; F:GO:0005515	-	G3DSA:3.30.70.100 (GENE3D); IPR011989 (G3DSA:1.25.10.GENE3D); PTHR32079 (PANTHER); PTHR32079:SF0 (PANTHER); IPR000225 (PROSITE_PROFILES); IPR006121 (PROSITE_PROFILES); IPR006121 (SUPERFAMILY); IPR016024 (SUPERFAMILY)
Aqu2.1.30877_001	uncharacterized protein loc103185440 isoform x1	313	20	1.634e-17	0.4235	3	F:GO:0003676; P:GO:0090305; F:GO:0004518		IPR011528 (PFAM)
Aqu2.1.30900_001	---NA---	275	0			0	-		CYTOPLASMIC_DOMAIN (PHOBIUS); TRANSMEMBRANE (PHOBIUS); TRANSMEMBRANE (PHOBIUS); NON_CYTOPLASMIC_DOMAIN (PHOBIUS); NON_CYTOPLASMIC_DOMAIN (PHOBIUS); TMhelix (TMHMM); TMhelix (TMHMM)
Aqu2.1.30905_001	protein lin-54 homolog isoform x2	417	20	0	0.5975	0	-		IPR005172 (PFAM); PTHR12446 (PANTHER); PTHR12446:SF6 (PANTHER); IPR005172 (PROSITE_PROFILES)
Aqu2.1.30923_001	uncharacterized protein loc100571459	222	20	7.80702e-13	0.523	1	F:GO:0008270		no IPS match
Aqu2.1.30970_001	---NA---	240	0			0	-		no IPS match
Aqu2.1.31004_001	PREDICTED: hypothetical protein LOC100638228 [Amphimedon queenslandica]	898	20	0	0.541	2	F:GO:0005515; P:GO:0007165	-	Coil (COILS); Coil (COILS); IPR003590 (SMART); G3DSA:3.80.10.10 (GENE3D); PTHR24106 (PANTHER); IPR000488 (PROSITE_PROFILES); SSF52047 (SUPERFAMILY)
Aqu2.1.31014_001	plexin-a4 isoform x2	1100	20	0	0.435	8	P:GO:0009653; C:GO:0016021; C:GO:0005622; P:GO:0007165; P:GO:0044767; P:GO:0007399; F:GO:0004872; F:GO:0005515	-	IPR002909 (SMART); IPR016201 (SMART); IPR001627 (SMART); G3DSA:3.30.1680.10 (GENE3D); IPR013783 (G3DSA:2.60.40.GENE3D); IPR013783 (G3DSA:2.60.40.GENE3D); IPR002165 (PFAM); IPR002909 (PFAM); IPR013783 (G3DSA:2.60.40.GENE3D); G3DSA:3.30.1680.10 (GENE3D); PTHR22625:SF16 (PANTHER); PTHR22625 (PANTHER); SIGNAL_PEPTIDE_N_REGION (PHOBIUS); NON_CYTOPLASMIC_DOMAIN (PHOBIUS); SIGNAL_PEPTIDE (PHOBIUS); TRAN…
Aqu2.1.31015_001	plexin-a1 isoform x1	1799	20	0	0.424	6	C:GO:0016021; C:GO:0005622; F:GO:0004872; P:GO:0007165; P:GO:0007275; F:GO:0005515	-	IPR002909 (SMART); IPR016201 (SMART); IPR002909 (PFAM); G3DSA:3.30.1680.10 (GENE3D); IPR013783 (G3DSA:2.60.40.GENE3D); IPR002165 (PFAM); PTHR22625:SF16 (PANTHER); PTHR22625 (PANTHER); TRANSMEMBRANE (PHOBIUS); TRANSMEMBRANE (PHOBIUS); CYTOPLASMIC_DOMAIN (PHOBIUS); TRANSMEMBRANE (PHOBIUS); NON_CYTOPLASMIC_DOMAIN (PHOBIUS); CYTOPLASMIC_DOMAIN (PHOBIUS); NON_CYTOPLASMIC_DOMAIN (PHOBIUS); IPR016201 (S…
Aqu2.1.31023_001	trna (cytidine guanosine -2 -o)-methyltransferase isoform x3	278	20	5.41803e-144	0.668	3	F:GO:0003677; F:GO:0008168; P:GO:0001510	-	G3DSA:3.40.50.150 (GENE3D); IPR002877 (PFAM); G3DSA:3.40.50.150 (GENE3D); IPR015507 (PANTHER); IPR015507 (HAMAP); SSF53335 (SUPERFAMILY)
Aqu2.1.31026_001	protein arginine n-methyltransferase 3- partial	583	20	0	0.6105	3	F:GO:0003676; F:GO:0016772; F:GO:0005515	-	Coil (COILS); Coil (COILS); PF13418 (PFAM); IPR015915 (G3DSA:2.120.10.GENE3D); PTHR23244 (PANTHER); IPR011043 (SUPERFAMILY); SSF117281 (SUPERFAMILY)
Aqu2.1.31027_001	rna-directed dna polymerase from mobile element jockey-like	275	20	1.73957e-63	0.563	3	F:GO:0003723; F:GO:0003964; P:GO:0006278		IPR000477 (PFAM); PTHR19446 (PANTHER); SSF56672 (SUPERFAMILY)
Aqu2.1.31036_001	cytidine and deoxycytidylate deaminase zinc-binding region	450	20	3.65979e-57	0.5595	5	F:GO:0008270; F:GO:0016787; F:GO:0005515; F:GO:0005525; P:GO:0007264	-	Coil (COILS); Coil (COILS); IPR002125 (PFAM); IPR000488 (PFAM); G3DSA:3.40.140.10 (GENE3D); IPR001806 (PFAM); IPR011029 (G3DSA:1.10.533.GENE3D); G3DSA:3.40.50.300 (GENE3D); PTHR11086:SF5 (PANTHER); IPR015517 (PANTHER); IPR000488 (PROSITE_PROFILES); IPR027417 (SUPERFAMILY); IPR016193 (SUPERFAMILY); IPR011029 (SUPERFAMILY)
Aqu2.1.31058_001	myotubularin-related protein 6-like	682	20	0	0.636	4	F:GO:0004725; F:GO:0046872; P:GO:0035335; P:GO:0006570	EC:3.1.3.48	Coil (COILS); IPR003595 (SMART); IPR000306 (SMART); IPR013083 (G3DSA:3.30.40.GENE3D); IPR000306 (PFAM); G3DSA:3.90.190.10 (GENE3D); IPR010569 (PFAM); PTHR10807:SF11 (PANTHER); PTHR10807 (PANTHER); IPR016130 (PROSITE_PATTERNS); IPR017906 (PROSITE_PROFILES); IPR017455 (PROSITE_PROFILES); SSF50729 (SUPERFAMILY); SSF52799 (SUPERFAMILY); IPR011011 (SUPERFAMILY)
Aqu2.1.31068_001	u-box domain-containing protein 33-like	1488	20	0	0.6745	9	P:GO:0006468; F:GO:0004672; C:GO:0016021; C:GO:0005622; F:GO:0004872; F:GO:0005524; P:GO:0007165; P:GO:0007275; F:GO:0005515	-	Coil (COILS); IPR016201 (SMART); IPR001245 (PFAM); G3DSA:3.30.1680.10 (GENE3D); IPR002165 (PFAM); IPR002909 (PFAM); IPR015916 (G3DSA:2.130.10.GENE3D); IPR013783 (G3DSA:2.60.40.GENE3D); G3DSA:3.30.200.20 (GENE3D); IPR015915 (G3DSA:2.120.10.GENE3D); G3DSA:1.10.510.10 (GENE3D); G3DSA:3.30.1680.10 (GENE3D); PTHR22625:SF16 (PANTHER); PTHR22625 (PANTHER); IPR017441 (PROSITE_PATTERNS); IPR000719 (PROSIT…
Aqu2.1.31069_001	plexin-a1 isoform x1	1373	20	0	0.4215	6	C:GO:0016021; C:GO:0005622; F:GO:0004872; P:GO:0007165; P:GO:0007275; F:GO:0005515	-	IPR002909 (SMART); IPR016201 (SMART); G3DSA:3.30.1680.10 (GENE3D); IPR002165 (PFAM); IPR013783 (G3DSA:2.60.40.GENE3D); IPR013783 (G3DSA:2.60.40.GENE3D); G3DSA:3.30.1680.10 (GENE3D); IPR002909 (PFAM); IPR013783 (G3DSA:2.60.40.GENE3D); PTHR22625 (PANTHER); PTHR22625:SF16 (PANTHER); SIGNAL_PEPTIDE_N_REGION (PHOBIUS); SIGNAL_PEPTIDE_H_REGION (PHOBIUS); NON_CYTOPLASMIC_DOMAIN (PHOBIUS); CYTOPLASMIC_DO…
Aqu2.1.31081_001	uncharacterized	276	20	1.9414e-171	0.7275	7	F:GO:0003964; P:GO:0006278; F:GO:0003723; F:GO:0004190; P:GO:0006508; F:GO:0008270; P:GO:0015074	EC:2.7.7.49; EC:3.4.23.0	IPR001584 (PFAM); G3DSA:3.30.420.10 (GENE3D); PTHR10178 (PANTHER); IPR001584 (PROSITE_PROFILES); IPR012337 (SUPERFAMILY)
Aqu2.1.31086_001	tetratricopeptide repeat protein 7b-like	465	20	7.01208e-78	0.609	5	P:GO:0009199; P:GO:0009119; F:GO:0016787; P:GO:0009165; P:GO:0009259	-	IPR014716 (G3DSA:3.90.215.GENE3D); NON_CYTOPLASMIC_DOMAIN (PHOBIUS); TRANSMEMBRANE (PHOBIUS); CYTOPLASMIC_DOMAIN (PHOBIUS); IPR002181 (SUPERFAMILY); TMhelix (TMHMM)
Aqu2.1.31087_001	---NA---	391	0			0	-		TRANSMEMBRANE (PHOBIUS); CYTOPLASMIC_DOMAIN (PHOBIUS); NON_CYTOPLASMIC_DOMAIN (PHOBIUS); TRANSMEMBRANE (PHOBIUS); NON_CYTOPLASMIC_DOMAIN (PHOBIUS); CYTOPLASMIC_DOMAIN (PHOBIUS); TRANSMEMBRANE (PHOBIUS); TRANSMEMBRANE (PHOBIUS); CYTOPLASMIC_DOMAIN (PHOBIUS); NON_CYTOPLASMIC_DOMAIN (PHOBIUS); NON_CYTOPLASMIC_DOMAIN (PHOBIUS); TRANSMEMBRANE (PHOBIUS); TRANSMEMBRANE (PHOBIUS); TMhelix (TMHMM); TMheli…
Aqu2.1.31100_001	ubiquitin carboxyl-terminal hydrolase 5	50	20	9.18613e-22	0.7965	3	P:GO:0006511; F:GO:0004221; P:GO:0016579	EC:3.1.2.15	IPR001394 (PFAM); PTHR24006:SF149 (PANTHER); PTHR24006 (PANTHER); SSF54001 (SUPERFAMILY)
Aqu2.1.31101_001	deleted in malignant brain tumors 1	908	20	1.38303e-62	0.429	2	C:GO:0016020; F:GO:0005044		IPR001190 (PRINTS); IPR017448 (SMART); G3DSA:3.10.250.10 (GENE3D); IPR001190 (PFAM); PTHR19331 (PANTHER); PTHR19331:SF8 (PANTHER); IPR001190 (PROSITE_PATTERNS); NON_CYTOPLASMIC_DOMAIN (PHOBIUS); NON_CYTOPLASMIC_DOMAIN (PHOBIUS); TRANSMEMBRANE (PHOBIUS); SIGNAL_PEPTIDE_H_REGION (PHOBIUS); TRANSMEMBRANE (PHOBIUS); CYTOPLASMIC_DOMAIN (PHOBIUS); SIGNAL_PEPTIDE (PHOBIUS); TRANSMEMBRANE (PHOBIUS); CYTO…
Aqu2.1.31153_001	leucine-rich repeat serine threonine-protein kinase 1	2135	20	0	0.4805	7	F:GO:0005515; F:GO:0005524; P:GO:0006468; C:GO:0005622; P:GO:0007264; F:GO:0005525; F:GO:0004674	-	SM00364 (SMART); IPR003591 (SMART); IPR002110 (SMART); IPR002290 (SMART); IPR020683 (G3DSA:1.25.40.GENE3D); G3DSA:3.80.10.10 (GENE3D); IPR000719 (PFAM); IPR020683 (PFAM); G3DSA:3.30.70.1390 (GENE3D); IPR020683 (G3DSA:1.25.40.GENE3D); PF13855 (PFAM); G3DSA:1.10.510.10 (GENE3D); IPR013684 (PFAM); IPR001611 (PFAM); G3DSA:3.30.200.20 (GENE3D); G3DSA:3.40.50.300 (GENE3D); PTHR23257:SF88 (PANTHER); PTH…
Aqu2.1.31167_001	protein asteroid homolog 1	651	20	1.39836e-130	0.418	3	P:GO:0006281; P:GO:0090305; F:GO:0004518		PF12813 (PFAM); G3DSA:3.40.50.1010 (GENE3D); IPR026832 (PANTHER); SSF88723 (SUPERFAMILY)
Aqu2.1.31168_001	furin	366	20	0	0.597	15	P:GO:0042176; P:GO:0032902; P:GO:0007166; F:GO:0005515; P:GO:0019058; F:GO:0004252; C:GO:0044431; P:GO:0051241; P:GO:0006518; C:GO:0044425; P:GO:0016043; P:GO:0016486; P:GO:0006508; P:GO:0032268; P:GO:0031329	EC:3.4.21.0	IPR015500 (PRINTS); G3DSA:3.30.70.850 (GENE3D); IPR000209 (PFAM); IPR000209 (G3DSA:3.40.50.GENE3D); IPR015500 (PANTHER); IPR022398 (PROSITE_PATTERNS); IPR023827 (PROSITE_PATTERNS); CYTOPLASMIC_DOMAIN (PHOBIUS); TRANSMEMBRANE (PHOBIUS); NON_CYTOPLASMIC_DOMAIN (PHOBIUS); SIGNAL_PEPTIDE_C_REGION (PHOBIUS); SIGNAL_PEPTIDE_N_REGION (PHOBIUS); SIGNAL_PEPTIDE_H_REGION (PHOBIUS); SIGNAL_PEPTIDE (PHOBIUS)…
Aqu2.1.31183_001	---NA---	268	0			0	-		CYTOPLASMIC_DOMAIN (PHOBIUS); NON_CYTOPLASMIC_DOMAIN (PHOBIUS); TRANSMEMBRANE (PHOBIUS); TMhelix (TMHMM)
Aqu2.1.31188_001	atp-binding cassette sub-family a member 3-like	3104	20	0	0.63	2	F:GO:0016887; F:GO:0005524		IPR003593 (SMART); IPR007042 (PFAM); IPR003439 (PFAM); G3DSA:3.40.50.300 (GENE3D); IPR021933 (PFAM); PF12698 (PFAM); PTHR19229:SF36 (PANTHER); IPR026082 (PANTHER); NON_CYTOPLASMIC_DOMAIN (PHOBIUS); CYTOPLASMIC_DOMAIN (PHOBIUS); TRANSMEMBRANE (PHOBIUS); CYTOPLASMIC_DOMAIN (PHOBIUS); NON_CYTOPLASMIC_DOMAIN (PHOBIUS); TRANSMEMBRANE (PHOBIUS); NON_CYTOPLASMIC_DOMAIN (PHOBIUS); CYTOPLASMIC_DOMAIN (PHO…
Aqu2.1.31189_001	---NA---	39	0			0	-		no IPS match
Aqu2.1.31190_001	zgc:165461 protein	154	4	8.92733e-08	0.4475	0	-		IPR010510 (PFAM); SIGNAL_PEPTIDE_C_REGION (PHOBIUS); SIGNAL_PEPTIDE_N_REGION (PHOBIUS); SIGNAL_PEPTIDE_H_REGION (PHOBIUS); SIGNAL_PEPTIDE (PHOBIUS); NON_CYTOPLASMIC_DOMAIN (PHOBIUS); SignalP-noTM (SIGNALP_GRAM_NEGATIVE); SignalP-noTM (SIGNALP_EUK); SignalP-TM (SIGNALP_GRAM_POSITIVE)
Aqu2.1.31205_001	PREDICTED: hypothetical protein LOC100639045, partial [Amphimedon queenslandica]	567	3	1.09827e-08	0.44	1	F:GO:0005515		IPR013783 (G3DSA:2.60.40.GENE3D); SIGNAL_PEPTIDE_N_REGION (PHOBIUS); SIGNAL_PEPTIDE_C_REGION (PHOBIUS); TRANSMEMBRANE (PHOBIUS); NON_CYTOPLASMIC_DOMAIN (PHOBIUS); SIGNAL_PEPTIDE (PHOBIUS); CYTOPLASMIC_DOMAIN (PHOBIUS); SIGNAL_PEPTIDE_H_REGION (PHOBIUS); IPR003961 (PROSITE_PROFILES); SignalP-noTM (SIGNALP_GRAM_NEGATIVE); SignalP-noTM (SIGNALP_EUK); SignalP-TM (SIGNALP_GRAM_POSITIVE); IPR003961 (SU…
Aqu2.1.31216_001	neural cell adhesion molecule 1 isoform x6	878	20	4.20745e-18	0.4155	1	F:GO:0005515		IPR003599 (SMART); IPR003598 (SMART); IPR003961 (SMART); IPR013783 (G3DSA:2.60.40.GENE3D); IPR013783 (G3DSA:2.60.40.GENE3D); IPR013783 (G3DSA:2.60.40.GENE3D); IPR013783 (G3DSA:2.60.40.GENE3D); IPR013098 (PFAM); IPR013783 (G3DSA:2.60.40.GENE3D); PF13895 (PFAM); IPR013783 (G3DSA:2.60.40.GENE3D); IPR003961 (PFAM); PTHR10489 (PANTHER); NON_CYTOPLASMIC_DOMAIN (PHOBIUS); TRANSMEMBRANE (PHOBIUS); SIGNAL…
Aqu2.1.31217_001	PREDICTED: hypothetical protein LOC100633301 [Amphimedon queenslandica]	549	3	0	0.706667	0	-		IPR003599 (SMART); PF13895 (PFAM); IPR013783 (G3DSA:2.60.40.GENE3D); TRANSMEMBRANE (PHOBIUS); SIGNAL_PEPTIDE_N_REGION (PHOBIUS); NON_CYTOPLASMIC_DOMAIN (PHOBIUS); SIGNAL_PEPTIDE_H_REGION (PHOBIUS); SIGNAL_PEPTIDE_C_REGION (PHOBIUS); SIGNAL_PEPTIDE (PHOBIUS); CYTOPLASMIC_DOMAIN (PHOBIUS); SignalP-TM (SIGNALP_GRAM_POSITIVE); SignalP-noTM (SIGNALP_EUK); SignalP-noTM (SIGNALP_GRAM_NEGATIVE); SSF48726…
Aqu2.1.31224_001	nuclear factor related to kappa-b-binding	834	20	0	0.5935	4	C:GO:0031011; F:GO:0005488; P:GO:0044260; P:GO:0090304	-	IPR025220 (PFAM); IPR024867 (PANTHER); PTHR13052:SF0 (PANTHER)
Aqu2.1.31239_001	39s ribosomal protein mitochondrial isoform x2	144	20	9.28303e-18	0.541	4	C:GO:0005739; P:GO:0006412; C:GO:0005840; F:GO:0003735	-	IPR000218 (PFAM); IPR023571 (G3DSA:2.40.150.GENE3D); PTHR21037:SF0 (PANTHER); PTHR21037 (PANTHER); IPR023571 (SUPERFAMILY)
Aqu2.1.31242_001	sodium potassium-transporting atpase subunit alpha-1	1024	20	0	0.799	31	F:GO:0051087; F:GO:0030506; P:GO:0002028; F:GO:0043548; C:GO:0005901; C:GO:0005783; F:GO:0030955; P:GO:0060081; C:GO:0016323; C:GO:0030315; P:GO:0008217; P:GO:0006754; P:GO:0010107; P:GO:0002026; F:GO:0031402; P:GO:0045989; P:GO:0031947; F:GO:0019904; P:GO:0045822; C:GO:0005794; F:GO:0005524; C:GO:0042470; F:GO:0019901; P:GO:0045823; C:GO:0005890; F:GO:0005391; P:GO:0042493; F:GO:0043531; P:GO:00…	EC:3.6.3.9	PR00121 (PRINTS); IPR001757 (PRINTS); IPR004014 (SMART); IPR008250 (G3DSA:2.70.150.GENE3D); IPR023298 (G3DSA:1.20.1110.GENE3D); IPR001757 (TIGRFAM); IPR006068 (PFAM); IPR023214 (PFAM); G3DSA:4.10.6.10 (GENE3D); IPR008250 (PFAM); IPR005775 (TIGRFAM); IPR004014 (PFAM); IPR023299 (G3DSA:3.40.1110.GENE3D); PTHR24093:SF58 (PANTHER); PTHR24093 (PANTHER); IPR018303 (PROSITE_PATTERNS); TRANSMEMBRANE (PHO…
Aqu2.1.31267_001	nuclease harbi1-like	350	20	0	0.6695	0	-		IPR027806 (PFAM); IPR026103 (PANTHER); PTHR22930:SF6 (PANTHER)
Aqu2.1.31282_001	predicted protein [Nematostella vectensis]	100	1	1.47921e-06	0.64	0	-		no IPS match
Aqu2.1.31347_001	PREDICTED: hypothetical protein LOC100639407 [Amphimedon queenslandica]	478	1	0	0.96	0	-		SIGNAL_PEPTIDE_C_REGION (PHOBIUS); TRANSMEMBRANE (PHOBIUS); SIGNAL_PEPTIDE (PHOBIUS); CYTOPLASMIC_DOMAIN (PHOBIUS); SIGNAL_PEPTIDE_N_REGION (PHOBIUS); NON_CYTOPLASMIC_DOMAIN (PHOBIUS); SIGNAL_PEPTIDE_H_REGION (PHOBIUS); SignalP-TM (SIGNALP_EUK); TMhelix (TMHMM); TMhelix (TMHMM)
Aqu2.1.31353_001	prelamin-a c isoform x3	635	20	0	0.5765	5	P:GO:0006996; P:GO:0051726; F:GO:0005198; C:GO:0005882; C:GO:0005634	-	Coil (COILS); Coil (COILS); Coil (COILS); Coil (COILS); IPR013763 (SMART); IPR013763 (G3DSA:1.10.472.GENE3D); IPR001664 (PFAM); IPR006671 (PFAM); G3DSA:1.20.5.170 (GENE3D); IPR004367 (PFAM); G3DSA:2.60.40.1260 (GENE3D); PTHR10177:SF64 (PANTHER); PTHR10177 (PANTHER); IPR013763 (SUPERFAMILY); SSF64593 (SUPERFAMILY)
Aqu2.1.31354_001	e3 ubiquitin-protein ligase nedd4 isoform x1	792	20	0	0.553	2	F:GO:0005515; F:GO:0004842		IPR000008 (SMART); IPR000569 (SMART); IPR001202 (SMART); G3DSA:3.30.2160.10 (GENE3D); G3DSA:2.20.70.10 (GENE3D); G3DSA:2.20.70.10 (GENE3D); IPR000008 (PFAM); IPR001202 (PFAM); IPR000569 (PFAM); G3DSA:2.60.40.150 (GENE3D); PTHR11254 (PANTHER); PTHR11254:SF78 (PANTHER); IPR001202 (PROSITE_PATTERNS); IPR001202 (PROSITE_PATTERNS); IPR000569 (PROSITE_PROFILES); IPR000008 (PROSITE_PROFILES); IPR001202 …
Aqu2.1.31361_001	---NA---	718	0			0	-		no IPS match
Aqu2.1.31362_001	---NA---	57	0			0	-		Coil (COILS)
Aqu2.1.31392_001	rna pseudouridylate synthase domain-containing protein 2-like	268	20	5.04102e-53	0.555	3	F:GO:0009982; F:GO:0003723; P:GO:0001522	-	IPR006145 (PFAM); PTHR10436:SF40 (PANTHER); PTHR10436 (PANTHER); IPR006224 (PROSITE_PATTERNS); IPR020103 (SUPERFAMILY)
Aqu2.1.31414_001	protein arginine n-methyltransferase 3- partial	1132	20	0	0.6475	3	F:GO:1901363; F:GO:0097159; F:GO:0005515	-	Coil (COILS); Coil (COILS); IPR015915 (G3DSA:2.120.10.GENE3D); PTHR23244 (PANTHER); SSF117281 (SUPERFAMILY); SSF117281 (SUPERFAMILY)
Aqu2.1.31424_001	polyubiquitin-c- partial	781	4	0	0.6325	2	P:GO:0007165; F:GO:0005515	-	Coil (COILS); IPR000488 (PFAM); IPR011029 (G3DSA:1.10.533.GENE3D); NON_CYTOPLASMIC_DOMAIN (PHOBIUS); CYTOPLASMIC_DOMAIN (PHOBIUS); TRANSMEMBRANE (PHOBIUS); IPR000488 (PROSITE_PROFILES); IPR011029 (SUPERFAMILY); TMhelix (TMHMM)
Aqu2.1.31436_001	leukocyte tyrosine kinase receptor-like	724	20	0	0.7505	3	F:GO:0004713; P:GO:0018108; F:GO:0005524	EC:2.7.10.0	IPR001245 (PRINTS); IPR020635 (SMART); G3DSA:1.10.510.10 (GENE3D); IPR001245 (PFAM); PTHR24418 (PANTHER); IPR008266 (PROSITE_PATTERNS); IPR000719 (PROSITE_PROFILES); IPR011009 (SUPERFAMILY)
Aqu2.1.31441_001	dna methyltransferase 1-associated protein 1-like	86	20	3.68272e-09	0.66	3	P:GO:0016568; P:GO:0044238; P:GO:0044260	-	no IPS match
Aqu2.1.31447_001	uncharacterized protein loc103130989 isoform x2	283	8	5.04723e-12	0.42375	2	P:GO:0008150; C:GO:0005575		IPR004212 (G3DSA:3.90.1460.GENE3D); IPR004212 (PFAM); IPR004212 (PROSITE_PROFILES); IPR004212 (SUPERFAMILY)
Aqu2.1.31487_001	high affinity camp-specific 3 -cyclic phosphodiesterase 7a-like isoform x2	1042	20	0	0.563	3	P:GO:0007165; F:GO:0004114; P:GO:0006144	EC:3.1.4.17	Coil (COILS); Coil (COILS); IPR023088 (PRINTS); IPR003607 (SMART); IPR002073 (PFAM); IPR002073 (G3DSA:1.10.1300.GENE3D); PTHR11347:SF36 (PANTHER); PTHR11347 (PANTHER); CYTOPLASMIC_DOMAIN (PHOBIUS); NON_CYTOPLASMIC_DOMAIN (PHOBIUS); TRANSMEMBRANE (PHOBIUS); SSF109604 (SUPERFAMILY)
Aqu2.1.31491_001	---NA---	195	0			0	-		Coil (COILS); Coil (COILS)
Aqu2.1.31497_001	---NA---	113	0			0	-		NON_CYTOPLASMIC_DOMAIN (PHOBIUS); CYTOPLASMIC_DOMAIN (PHOBIUS); CYTOPLASMIC_DOMAIN (PHOBIUS); TRANSMEMBRANE (PHOBIUS); TRANSMEMBRANE (PHOBIUS); TMhelix (TMHMM)
Aqu2.1.31500_001	---NA---	34	0			0	-		NON_CYTOPLASMIC_DOMAIN (PHOBIUS); CYTOPLASMIC_DOMAIN (PHOBIUS); TRANSMEMBRANE (PHOBIUS); TMhelix (TMHMM)
Aqu2.1.31510_001	---NA---	254	0			0	-		TRANSMEMBRANE (PHOBIUS); TRANSMEMBRANE (PHOBIUS); CYTOPLASMIC_DOMAIN (PHOBIUS); NON_CYTOPLASMIC_DOMAIN (PHOBIUS); CYTOPLASMIC_DOMAIN (PHOBIUS); TRANSMEMBRANE (PHOBIUS); NON_CYTOPLASMIC_DOMAIN (PHOBIUS); TMhelix (TMHMM); TMhelix (TMHMM); TMhelix (TMHMM)
Aqu2.1.31511_001	u-box domain-containing protein 33-like	716	20	0	0.652	4	F:GO:0004672; P:GO:0006468; F:GO:0005515; F:GO:0005524	-	Coil (COILS); Coil (COILS); G3DSA:3.30.200.20 (GENE3D); IPR015915 (G3DSA:2.120.10.GENE3D); IPR001245 (PFAM); PTHR23244 (PANTHER); IPR017441 (PROSITE_PATTERNS); IPR000719 (PROSITE_PROFILES); IPR011009 (SUPERFAMILY); SSF117281 (SUPERFAMILY)
Aqu2.1.31515_001	---NA---	133	0			0	-		no IPS match
Aqu2.1.31517_001	---NA---	138	0			0	-		SignalP-noTM (SIGNALP_EUK)
Aqu2.1.31543_001	---NA---	37	0			0	-		no IPS match
Aqu2.1.31544_001	tigger transposable element-derived protein 6- partial	138	1	0.000307982	0.5	1	F:GO:0003676		no IPS match
Aqu2.1.31600_001	probable atp-dependent rna helicase ddx58-like	454	20	4.57908e-99	0.673	4	F:GO:0004713; P:GO:0018108; F:GO:0005524; F:GO:0005515	EC:2.7.10.0	Coil (COILS); IPR001452 (SMART); G3DSA:2.30.30.40 (GENE3D); IPR011029 (G3DSA:1.10.533.GENE3D); IPR001452 (PFAM); IPR001452 (PROSITE_PROFILES); IPR001452 (SUPERFAMILY)
Aqu2.1.31616_001	iq and ubiquitin-like domain-containing partial	67	7	2.40331e-13	0.714286	0	-		no IPS match
Aqu2.1.31633_001	gamma-aminobutyric acid receptor-associated	127	20	8.16339e-88	0.6175	1	P:GO:0006914	-	G3DSA:3.10.20.90 (GENE3D); IPR004241 (PFAM); PTHR10969:SF5 (PANTHER); IPR004241 (PANTHER); SSF54236 (SUPERFAMILY)
Aqu2.1.31639_001	kinesin-like protein kif21a-like isoform x2	1383	20	0	0.6185	5	F:GO:0005524; P:GO:0007018; F:GO:0003777; F:GO:0008017; C:GO:0005871	-	Coil (COILS); Coil (COILS); Coil (COILS); Coil (COILS); Coil (COILS); Coil (COILS); Coil (COILS); IPR001752 (PRINTS); IPR001752 (SMART); IPR001680 (SMART); IPR001752 (G3DSA:3.40.850.GENE3D); IPR001752 (PFAM); IPR001680 (PFAM); IPR015943 (G3DSA:2.130.10.GENE3D); PTHR24115:SF278 (PANTHER); IPR027640 (PANTHER); IPR019821 (PROSITE_PATTERNS); TRANSMEMBRANE (PHOBIUS); NON_CYTOPLASMIC_DOMAIN (PHOBIUS); …
Aqu2.1.31641_001	kinesin-like protein kif21a-like	178	20	3.90103e-119	0.575	1	F:GO:0005515		IPR001680 (SMART); IPR001680 (PFAM); IPR015943 (G3DSA:2.130.10.GENE3D); PTHR22844 (PANTHER); IPR017986 (PROSITE_PROFILES); IPR001680 (PROSITE_PROFILES); IPR017986 (SUPERFAMILY)
Aqu2.1.31642_001	btb poz domain-containing protein kctd20	314	20	0	0.7865	2	P:GO:0051260; F:GO:0005515	-	IPR000210 (SMART); IPR003131 (PFAM); IPR011333 (G3DSA:3.30.710.GENE3D); PTHR21637:SF0 (PANTHER); PTHR21637 (PANTHER); IPR011333 (SUPERFAMILY)
Aqu2.1.31643_001	grip and coiled-coil domain-containing protein 2	1070	20	5.06699e-58	0.497	4	F:GO:0005515; P:GO:0016043; C:GO:0044424; P:GO:0000042	-	Coil (COILS); Coil (COILS); Coil (COILS); Coil (COILS); Coil (COILS); Coil (COILS); Coil (COILS); Coil (COILS); Coil (COILS); Coil (COILS); Coil (COILS); Coil (COILS); Coil (COILS); Coil (COILS); Coil (COILS); Coil (COILS); IPR000237 (SMART); IPR000237 (G3DSA:1.10.220.GENE3D); IPR000237 (PFAM); IPR000237 (PROSITE_PROFILES)
Aqu2.1.31653_001	basement membrane-specific heparan sulfate proteoglycan core protein	1986	20	0	0.501	2	P:GO:0044707; F:GO:0005515	-	IPR002172 (PRINTS); IPR002172 (SMART); IPR003598 (SMART); IPR003599 (SMART); IPR002172 (G3DSA:4.10.400.GENE3D); IPR002035 (G3DSA:3.40.50.GENE3D); IPR013098 (PFAM); IPR013151 (PFAM); IPR002035 (G3DSA:3.40.50.GENE3D); IPR013783 (G3DSA:2.60.40.GENE3D); IPR002172 (G3DSA:4.10.400.GENE3D); IPR013783 (G3DSA:2.60.40.GENE3D); IPR013783 (G3DSA:2.60.40.GENE3D); IPR013783 (G3DSA:2.60.40.GENE3D); IPR013783 (G…
Aqu2.1.31673_001	ankyrin repeat domain-containing protein 12-like	1058	20	0	0.6095	5	P:GO:0048705; P:GO:0060325; C:GO:0005634; P:GO:0042475; F:GO:0005515	-	IPR002110 (PRINTS); IPR002110 (SMART); IPR020683 (G3DSA:1.25.40.GENE3D); IPR020683 (PFAM); PTHR24149 (PANTHER); IPR002110 (PROSITE_PROFILES); IPR020683 (PROSITE_PROFILES); IPR002110 (PROSITE_PROFILES); IPR002110 (PROSITE_PROFILES); IPR020683 (SUPERFAMILY)
Aqu2.1.31674_001	pogo transposable element with krab domain- partial	85	20	2.34889e-20	0.671	1	F:GO:0003676		IPR006600 (PFAM)
Aqu2.1.31687_001	uncharacterized protein loc100571363	144	20	1.05528e-20	0.6225	1	F:GO:0008270		no IPS match
Aqu2.1.31688_001	uncharacterized protein loc100207175	207	20	2.063e-29	0.636	1	F:GO:0008270		TRANSMEMBRANE (PHOBIUS); CYTOPLASMIC_DOMAIN (PHOBIUS); NON_CYTOPLASMIC_DOMAIN (PHOBIUS); TMhelix (TMHMM)
Aqu2.1.31726_001	zinc finger bed domain-containing protein 1-like	704	20	1.16401e-89	0.4685	2	F:GO:0046983; F:GO:0003676		IPR008906 (PFAM); PTHR23272 (PANTHER); IPR012337 (SUPERFAMILY)
Aqu2.1.31803_001	fibrinogen-like molecule	381	20	1.74216e-30	0.512	3	P:GO:0044763; P:GO:0050877; P:GO:0050794	-	IPR002181 (SMART); IPR014716 (G3DSA:3.90.215.GENE3D); IPR002181 (PFAM); PTHR19143:SF52 (PANTHER); PTHR19143 (PANTHER); SIGNAL_PEPTIDE_N_REGION (PHOBIUS); SIGNAL_PEPTIDE_H_REGION (PHOBIUS); SIGNAL_PEPTIDE (PHOBIUS); SIGNAL_PEPTIDE_C_REGION (PHOBIUS); NON_CYTOPLASMIC_DOMAIN (PHOBIUS); IPR002181 (PROSITE_PROFILES); SignalP-TM (SIGNALP_GRAM_POSITIVE); SignalP-noTM (SIGNALP_GRAM_NEGATIVE); SignalP-noT…
Aqu2.1.31839_001	integrator complex subunit 5	942	20	1.20548e-51	0.476	2	C:GO:0032039; P:GO:0016180		PF14838 (PFAM); PF14837 (PFAM); PTHR31697 (PANTHER); CYTOPLASMIC_DOMAIN (PHOBIUS); NON_CYTOPLASMIC_DOMAIN (PHOBIUS); TRANSMEMBRANE (PHOBIUS)
Aqu2.1.31842_001	tbc1 domain family member 2b-like	388	3	1.46794e-05	0.44	4	P:GO:0032313; P:GO:0032851; F:GO:0005543; F:GO:0005097		Coil (COILS); Coil (COILS); IPR001849 (SMART); IPR001849 (PFAM); IPR011993 (G3DSA:2.30.29.GENE3D); G3DSA:1.20.5.170 (GENE3D); SIGNAL_PEPTIDE_H_REGION (PHOBIUS); SIGNAL_PEPTIDE_N_REGION (PHOBIUS); NON_CYTOPLASMIC_DOMAIN (PHOBIUS); SIGNAL_PEPTIDE (PHOBIUS); SIGNAL_PEPTIDE_C_REGION (PHOBIUS); IPR001849 (PROSITE_PROFILES); SSF50729 (SUPERFAMILY)
Aqu2.1.31845_001	protein	1532	11	1.25766e-45	0.53	5	P:GO:0055085; P:GO:0006811; C:GO:0016021; F:GO:0005216; F:GO:0005515	-	IPR003961 (SMART); IPR003961 (PFAM); IPR013783 (G3DSA:2.60.40.GENE3D); TRANSMEMBRANE (PHOBIUS); TRANSMEMBRANE (PHOBIUS); CYTOPLASMIC_DOMAIN (PHOBIUS); SIGNAL_PEPTIDE_N_REGION (PHOBIUS); TRANSMEMBRANE (PHOBIUS); NON_CYTOPLASMIC_DOMAIN (PHOBIUS); TRANSMEMBRANE (PHOBIUS); NON_CYTOPLASMIC_DOMAIN (PHOBIUS); TRANSMEMBRANE (PHOBIUS); SIGNAL_PEPTIDE_C_REGION (PHOBIUS); NON_CYTOPLASMIC_DOMAIN (PHOBIUS); N…
Aqu2.1.31849_001	protein	561	8	4.12099e-29	0.4875	4	C:GO:0016021; F:GO:0005216; P:GO:0006811; P:GO:0055085	-	NON_CYTOPLASMIC_DOMAIN (PHOBIUS); CYTOPLASMIC_DOMAIN (PHOBIUS); TRANSMEMBRANE (PHOBIUS); CYTOPLASMIC_DOMAIN (PHOBIUS); TRANSMEMBRANE (PHOBIUS); NON_CYTOPLASMIC_DOMAIN (PHOBIUS); TRANSMEMBRANE (PHOBIUS); NON_CYTOPLASMIC_DOMAIN (PHOBIUS); TRANSMEMBRANE (PHOBIUS); CYTOPLASMIC_DOMAIN (PHOBIUS); NON_CYTOPLASMIC_DOMAIN (PHOBIUS); TRANSMEMBRANE (PHOBIUS); TRANSMEMBRANE (PHOBIUS); TRANSMEMBRANE (PHOBIUS)…
Aqu2.1.31855_001	uncharacterized protein c15orf26 homolog	277	20	0	0.5855	1	C:GO:0016020	-	G3DSA:2.80.10.50 (GENE3D); PTHR24274 (PANTHER); IPR016093 (SUPERFAMILY)
Aqu2.1.31887_001	ig-like domain-containing protein	849	20	3.27202e-22	0.442	5	C:GO:0016021; P:GO:0007154; F:GO:0005509; C:GO:0016020; F:GO:0030246		SIGNAL_PEPTIDE_N_REGION (PHOBIUS); NON_CYTOPLASMIC_DOMAIN (PHOBIUS); SIGNAL_PEPTIDE (PHOBIUS); CYTOPLASMIC_DOMAIN (PHOBIUS); TRANSMEMBRANE (PHOBIUS); SIGNAL_PEPTIDE_H_REGION (PHOBIUS); SIGNAL_PEPTIDE_C_REGION (PHOBIUS); SignalP-noTM (SIGNALP_EUK); TMhelix (TMHMM)
Aqu2.1.31888_001	---NA---	351	0			0	-		CYTOPLASMIC_DOMAIN (PHOBIUS); NON_CYTOPLASMIC_DOMAIN (PHOBIUS); TRANSMEMBRANE (PHOBIUS); TMhelix (TMHMM)
Aqu2.1.31889_001	focadhesin	877	20	4.50453e-27	0.4635	1	F:GO:0005488		IPR011989 (G3DSA:1.25.10.GENE3D); IPR022542 (PFAM); PTHR16212:SF3 (PANTHER); PTHR16212 (PANTHER); IPR016024 (SUPERFAMILY)
Aqu2.1.31890_001	---NA---	565	0			1	F:GO:0005515		IPR003961 (SMART); IPR013783 (G3DSA:2.60.40.GENE3D); SIGNAL_PEPTIDE_N_REGION (PHOBIUS); NON_CYTOPLASMIC_DOMAIN (PHOBIUS); SIGNAL_PEPTIDE_C_REGION (PHOBIUS); SIGNAL_PEPTIDE_H_REGION (PHOBIUS); SIGNAL_PEPTIDE (PHOBIUS); IPR003961 (PROSITE_PROFILES); SignalP-noTM (SIGNALP_GRAM_NEGATIVE); SignalP-noTM (SIGNALP_EUK); SignalP-TM (SIGNALP_GRAM_POSITIVE); IPR003961 (SUPERFAMILY)
Aqu2.1.31894_001	translocase of inner mitochondrial membrane domain-containing protein 1	228	20	4.35847e-32	0.515	2	C:GO:0016021; C:GO:0016020		IPR003397 (PFAM); PTHR13002 (PANTHER); CYTOPLASMIC_DOMAIN (PHOBIUS); TRANSMEMBRANE (PHOBIUS); NON_CYTOPLASMIC_DOMAIN (PHOBIUS); TRANSMEMBRANE (PHOBIUS); NON_CYTOPLASMIC_DOMAIN (PHOBIUS); CYTOPLASMIC_DOMAIN (PHOBIUS); TRANSMEMBRANE (PHOBIUS); NON_CYTOPLASMIC_DOMAIN (PHOBIUS); TRANSMEMBRANE (PHOBIUS); TMhelix (TMHMM); TMhelix (TMHMM); TMhelix (TMHMM)
Aqu2.1.31918_001	polyglutamine-binding protein 1- partial	203	20	2.49152e-61	0.579	1	F:GO:0005515		IPR001202 (SMART); IPR001202 (PFAM); PTHR21737:SF3 (PANTHER); PTHR21737 (PANTHER); IPR001202 (PROSITE_PROFILES); IPR001202 (SUPERFAMILY)
Aqu2.1.31932_001	transmembrane protein 161b	453	20	3.02603e-40	0.441	0	-		IPR019395 (PFAM); PTHR13624 (PANTHER); CYTOPLASMIC_DOMAIN (PHOBIUS); TRANSMEMBRANE (PHOBIUS); NON_CYTOPLASMIC_DOMAIN (PHOBIUS); TRANSMEMBRANE (PHOBIUS); TRANSMEMBRANE (PHOBIUS); NON_CYTOPLASMIC_DOMAIN (PHOBIUS); TRANSMEMBRANE (PHOBIUS); SIGNAL_PEPTIDE (PHOBIUS); NON_CYTOPLASMIC_DOMAIN (PHOBIUS); TRANSMEMBRANE (PHOBIUS); NON_CYTOPLASMIC_DOMAIN (PHOBIUS); SIGNAL_PEPTIDE_H_REGION (PHOBIUS); CYTOPLAS…
Aqu2.1.31943_001	---NA---	151	0			0	-		IPR003172 (SMART); IPR003172 (PFAM); IPR003172 (G3DSA:2.60.40.GENE3D); SIGNAL_PEPTIDE_H_REGION (PHOBIUS); NON_CYTOPLASMIC_DOMAIN (PHOBIUS); SIGNAL_PEPTIDE_N_REGION (PHOBIUS); SIGNAL_PEPTIDE_C_REGION (PHOBIUS); SIGNAL_PEPTIDE (PHOBIUS); SignalP-noTM (SIGNALP_EUK); SignalP-noTM (SIGNALP_GRAM_NEGATIVE); IPR014756 (SUPERFAMILY)
Aqu2.1.31962_001	ring finger protein nhl-1-like	953	20	0	0.624	4	F:GO:0016740; P:GO:0006464; F:GO:0008270; F:GO:0005515	-	IPR001841 (SMART); G3DSA:3.40.50.300 (GENE3D); IPR013083 (G3DSA:3.30.40.GENE3D); PF15227 (PFAM); IPR011029 (G3DSA:1.10.533.GENE3D); PTHR24103 (PANTHER); IPR017907 (PROSITE_PATTERNS); IPR001841 (PROSITE_PROFILES); SSF57850 (SUPERFAMILY); IPR027417 (SUPERFAMILY)
Aqu2.1.32010_001	wd repeat-containing protein 63- partial	661	20	2.52673e-98	0.592	2	P:GO:0007165; F:GO:0003950		Coil (COILS); IPR011029 (G3DSA:1.10.533.GENE3D)
Aqu2.1.32023_001	---NA---	100	0			0	-		no IPS match
Aqu2.1.32031_001	---NA---	75	0			0	-		Coil (COILS)
Aqu2.1.32038_001	uncharacterized	98	20	3.61813e-18	0.6015	5	F:GO:0003723; F:GO:0003676; P:GO:0015074; P:GO:0006278; F:GO:0003964		no IPS match
Aqu2.1.32111_001	synaptonemal complex protein 1	843	20	6.89532e-29	0.5265	4	C:GO:0000795; P:GO:0007283; P:GO:0007131; P:GO:0007130	-	Coil (COILS); Coil (COILS); Coil (COILS); Coil (COILS); Coil (COILS); Coil (COILS); Coil (COILS); Coil (COILS); G3DSA:1.20.5.340 (GENE3D); IPR008827 (PFAM); IPR008827 (PANTHER); PTHR18878:SF4 (PANTHER)
Aqu2.1.32117_001	low quality protein: calcyphosin-2	601	20	0	0.56	10	F:GO:0005509; P:GO:0016082; P:GO:0015031; P:GO:0045921; C:GO:0030054; C:GO:0030659; F:GO:0005543; F:GO:0046872; C:GO:0045211; C:GO:0042734		PTHR10891 (PANTHER); PTHR10891:SF491 (PANTHER); SSF47473 (SUPERFAMILY)
Aqu2.1.32118_001	synaptotagmin-7-like isoform x2	398	20	0	0.655	2	P:GO:0071912; F:GO:0005515	-	IPR000008 (PRINTS); IPR000008 (SMART); IPR000008 (PFAM); G3DSA:2.60.40.150 (GENE3D); PTHR10024 (PANTHER); IPR000008 (PROSITE_PROFILES); IPR000008 (SUPERFAMILY)
Aqu2.1.32125_001	glutamine--fructose-6-phosphate aminotransferase	477	20	0	0.806	16	P:GO:0006042; P:GO:0045719; F:GO:0030246; P:GO:0006541; P:GO:0009744; P:GO:0051289; P:GO:0032869; F:GO:0016597; F:GO:0004360; P:GO:0006488; C:GO:0005829; P:GO:0006987; P:GO:0006048; P:GO:0043687; P:GO:0006002; P:GO:0018279	EC:2.6.1.16	G3DSA:3.40.50.10490 (GENE3D); IPR000583 (PFAM); G3DSA:3.60.20.10 (GENE3D); IPR001347 (PFAM); PTHR10937 (PANTHER); PTHR10937:SF1 (PANTHER); IPR001347 (PROSITE_PROFILES); IPR017932 (PROSITE_PROFILES); SSF53697 (SUPERFAMILY); SSF56235 (SUPERFAMILY)
Aqu2.1.32156_001	attractin-like protein 1-like	1199	20	0	0.4575	4	F:GO:0005515; F:GO:0004872; P:GO:0007275; C:GO:0016020		IPR000742 (SMART); IPR000859 (SMART); IPR002049 (SMART); IPR016201 (SMART); G3DSA:2.10.25.10 (GENE3D); PF13418 (PFAM); IPR011498 (PFAM); G3DSA:2.170.300.10 (GENE3D); IPR015915 (G3DSA:2.120.10.GENE3D); IPR000859 (G3DSA:2.60.120.GENE3D); PF13964 (PFAM); IPR002165 (PFAM); IPR015916 (G3DSA:2.130.10.GENE3D); PTHR10574:SF3 (PANTHER); PTHR10574 (PANTHER); IPR013032 (PROSITE_PATTERNS); IPR013032 (PROSITE…
Aqu2.1.32177_001	protein ric1 homolog	786	20	5.2664e-48	0.531	3	F:GO:0003723; F:GO:0003964; P:GO:0006278	-	IPR000477 (PFAM); PTHR19446 (PANTHER); IPR000477 (PROSITE_PROFILES); SSF56672 (SUPERFAMILY)
Aqu2.1.32180_001	---NA---	65	0			0	-		no IPS match
Aqu2.1.32220_001	cleft lip and palate transmembrane protein 1 homolog	502	20	0	0.622	2	C:GO:0009897; P:GO:0033081	-	Coil (COILS); IPR008429 (PFAM); IPR008429 (PANTHER); NON_CYTOPLASMIC_DOMAIN (PHOBIUS); CYTOPLASMIC_DOMAIN (PHOBIUS); TRANSMEMBRANE (PHOBIUS); NON_CYTOPLASMIC_DOMAIN (PHOBIUS); CYTOPLASMIC_DOMAIN (PHOBIUS); TRANSMEMBRANE (PHOBIUS); TRANSMEMBRANE (PHOBIUS); TMhelix (TMHMM); TMhelix (TMHMM)
Aqu2.1.32224_001	---NA---	320	0			0	-		Coil (COILS)
Aqu2.1.32230_001	protein	1142	6	5.55254e-18	0.423333	0	-		IPR006626 (SMART); IPR012334 (G3DSA:2.160.20.GENE3D); IPR003368 (TIGRFAM); TRANSMEMBRANE (PHOBIUS); CYTOPLASMIC_DOMAIN (PHOBIUS); CYTOPLASMIC_DOMAIN (PHOBIUS); NON_CYTOPLASMIC_DOMAIN (PHOBIUS); NON_CYTOPLASMIC_DOMAIN (PHOBIUS); TRANSMEMBRANE (PHOBIUS); CYTOPLASMIC_DOMAIN (PHOBIUS); TRANSMEMBRANE (PHOBIUS); NON_CYTOPLASMIC_DOMAIN (PHOBIUS); NON_CYTOPLASMIC_DOMAIN (PHOBIUS); TRANSMEMBRANE (PHOBIUS)…
Aqu2.1.32270_001	fanconi anemia group d2 protein	1350	20	1.06868e-174	0.491	1	P:GO:0043066		Coil (COILS); PF14631 (PFAM); PTHR32086:SF0 (PANTHER); PTHR32086 (PANTHER); NON_CYTOPLASMIC_DOMAIN (PHOBIUS); TRANSMEMBRANE (PHOBIUS); CYTOPLASMIC_DOMAIN (PHOBIUS)
Aqu2.1.32271_001	oxoglutarate iron-dependent dioxygenase	443	20	5.98635e-61	0.526	2	F:GO:0016706; P:GO:0055114		IPR005123 (PFAM); IPR005123 (PROSITE_PROFILES)
Aqu2.1.32272_001	nad-dependent protein deacetylase sirtuin-2	413	20	3.13838e-126	0.6845	4	F:GO:0008270; F:GO:0016811; P:GO:0006476; F:GO:0070403	-	IPR017328 (PIRSF); IPR026591 (G3DSA:3.30.1600.GENE3D); G3DSA:3.40.50.1220 (GENE3D); IPR003000 (PFAM); IPR003000 (PANTHER); IPR026590 (PROSITE_PROFILES); SSF52467 (SUPERFAMILY)
Aqu2.1.32382_001	multidrug resistance-associated protein 1-like	873	20	0	0.589	4	F:GO:0005524; F:GO:0042626; C:GO:0016021; P:GO:0055085	EC:3.6.1.15	IPR003593 (SMART); G3DSA:1.20.1560.10 (GENE3D); G3DSA:3.40.50.300 (GENE3D); IPR003439 (PFAM); IPR001140 (PFAM); PTHR24223 (PANTHER); PTHR24223:SF61 (PANTHER); IPR017871 (PROSITE_PATTERNS); TRANSMEMBRANE (PHOBIUS); CYTOPLASMIC_DOMAIN (PHOBIUS); NON_CYTOPLASMIC_DOMAIN (PHOBIUS); NON_CYTOPLASMIC_DOMAIN (PHOBIUS); TRANSMEMBRANE (PHOBIUS); TRANSMEMBRANE (PHOBIUS); TRANSMEMBRANE (PHOBIUS); TRANSMEMBRAN…
Aqu2.1.32387_001	thromboxane-a synthase-like	505	20	0	0.639	5	F:GO:0020037; F:GO:0016705; F:GO:0004497; F:GO:0005506; P:GO:0055114	-	Coil (COILS); IPR001128 (PRINTS); IPR002401 (PRINTS); IPR001128 (G3DSA:1.10.630.GENE3D); IPR001128 (PFAM); PTHR24290:SF27 (PANTHER); PTHR24290 (PANTHER); IPR017972 (PROSITE_PATTERNS); SIGNAL_PEPTIDE (PHOBIUS); TRANSMEMBRANE (PHOBIUS); NON_CYTOPLASMIC_DOMAIN (PHOBIUS); SIGNAL_PEPTIDE_N_REGION (PHOBIUS); SIGNAL_PEPTIDE_C_REGION (PHOBIUS); CYTOPLASMIC_DOMAIN (PHOBIUS); SIGNAL_PEPTIDE_H_REGION (PHOBI…
Aqu2.1.32408_001	gag pol polyprotein	77	20	2.34353e-13	0.6715	3	P:GO:0043170; P:GO:0044238; F:GO:0003676	-	G3DSA:3.30.420.10 (GENE3D); PTHR10178:SF228 (PANTHER); PTHR10178 (PANTHER); NON_CYTOPLASMIC_DOMAIN (PHOBIUS); TRANSMEMBRANE (PHOBIUS); CYTOPLASMIC_DOMAIN (PHOBIUS); IPR012337 (SUPERFAMILY)
Aqu2.1.32428_001	atp-dependent dna helicase pif1- partial	66	9	8.52672e-16	0.703333	1	P:GO:0006259	-	no IPS match
Aqu2.1.32442_001	uncharacterized protein partial	348	1	4.22842e-07	0.42	0	-		no IPS match
Aqu2.1.32448_001	---NA---	132	0			0	-		no IPS match
Aqu2.1.32450_001	---NA---	84	0			0	-		no IPS match
Aqu2.1.32469_001	inositol-trisphosphate 3-kinase b	593	20	0	0.7065	1	F:GO:0008440	EC:2.7.1.127	IPR005522 (PFAM); IPR005522 (PANTHER); PTHR12400:SF5 (PANTHER); SIGNAL_PEPTIDE_N_REGION (PHOBIUS); SIGNAL_PEPTIDE (PHOBIUS); SIGNAL_PEPTIDE_H_REGION (PHOBIUS); SIGNAL_PEPTIDE_C_REGION (PHOBIUS); NON_CYTOPLASMIC_DOMAIN (PHOBIUS); SSF56104 (SUPERFAMILY)
Aqu2.1.32521_001	tnf receptor-associated factor 4-like	414	20	1.04609e-151	0.552	3	P:GO:0009987; F:GO:0005515; F:GO:0008270	-	IPR002083 (SMART); IPR013083 (G3DSA:3.30.40.GENE3D); IPR002083 (PFAM); IPR018957 (PFAM); PF02176 (PFAM); G3DSA:2.60.210.10 (GENE3D); PTHR10131 (PANTHER); IPR017907 (PROSITE_PATTERNS); IPR002083 (PROSITE_PROFILES); IPR001841 (PROSITE_PROFILES); IPR001293 (PROSITE_PROFILES); IPR001293 (PROSITE_PROFILES); IPR008974 (SUPERFAMILY); SSF57850 (SUPERFAMILY); IPR008974 (SUPERFAMILY); IPR008974 (SUPERFAMIL…
Aqu2.1.32540_001	---NA---	219	0			0	-		no IPS match
Aqu2.1.32558_001	n-acetyltransferase gcn5	339	20	4.35684e-15	0.4185	2	F:GO:0016740; F:GO:0008080		PTHR21471 (PANTHER); IPR016181 (SUPERFAMILY)
Aqu2.1.32578_001	kinesin motor domain protein	1054	20	0	0.619	8	F:GO:0003777; F:GO:0008017; P:GO:0035556; C:GO:0005874; F:GO:0005524; P:GO:0007018; C:GO:0005871; C:GO:0045298	-	Coil (COILS); Coil (COILS); IPR001752 (PRINTS); IPR001752 (SMART); IPR002110 (SMART); IPR020683 (G3DSA:1.25.40.GENE3D); IPR001752 (PFAM); IPR020683 (PFAM); IPR001752 (G3DSA:3.40.850.GENE3D); IPR011991 (G3DSA:1.10.10.GENE3D); IPR000591 (PFAM); IPR002110 (PFAM); IPR027640 (PANTHER); IPR019821 (PROSITE_PATTERNS); IPR002110 (PROSITE_PROFILES); IPR002110 (PROSITE_PROFILES); IPR002110 (PROSITE_PROFILES…
Aqu2.1.32584_001	epithelial cell-transforming sequence 2 oncogene-like isoform x1	392	20	1.73978e-47	0.646	1	F:GO:0005515		IPR001810 (SMART); PF12937 (PFAM); G3DSA:1.20.1280.50 (GENE3D); PTHR22844 (PANTHER); PTHR22844:SF99 (PANTHER); IPR001810 (PROSITE_PROFILES); IPR001810 (SUPERFAMILY)
Aqu2.1.32597_001	myotubularin-related protein 9	548	20	0	0.631	5	P:GO:0016311; F:GO:0016791; P:GO:0050790; F:GO:0030234; F:GO:0005515	EC:3.1.3.0	Coil (COILS); IPR010569 (PFAM); PTHR10807 (PANTHER); PTHR10807:SF9 (PANTHER); IPR017906 (PROSITE_PROFILES); SSF50729 (SUPERFAMILY); SSF52799 (SUPERFAMILY)
Aqu2.1.32615_001	receptor-type tyrosine-protein phosphatase delta-like	728	20	1.3557e-34	0.507	1	F:GO:0005515		PR00014 (PRINTS); IPR003961 (SMART); IPR003961 (PFAM); IPR013783 (G3DSA:2.60.40.GENE3D); PTHR10489:SF336 (PANTHER); PTHR10489 (PANTHER); IPR003961 (PROSITE_PROFILES); IPR007110 (PROSITE_PROFILES); IPR003961 (SUPERFAMILY)
Aqu2.1.32636_001	ferric-chelate reductase 1-like	1230	20	0	0.4725	1	C:GO:0016021		IPR006593 (SMART); IPR005018 (SMART); IPR002861 (PFAM); IPR005018 (PFAM); PTHR23130 (PANTHER); NON_CYTOPLASMIC_DOMAIN (PHOBIUS); TRANSMEMBRANE (PHOBIUS); NON_CYTOPLASMIC_DOMAIN (PHOBIUS); CYTOPLASMIC_DOMAIN (PHOBIUS); NON_CYTOPLASMIC_DOMAIN (PHOBIUS); SIGNAL_PEPTIDE_N_REGION (PHOBIUS); SIGNAL_PEPTIDE (PHOBIUS); TRANSMEMBRANE (PHOBIUS); SIGNAL_PEPTIDE_C_REGION (PHOBIUS); CYTOPLASMIC_DOMAIN (PHOBIU…
Aqu2.1.32681_001	low quality protein: hemicentin-1-like	999	20	0	0.4185	1	F:GO:0005515		IPR003961 (SMART); IPR003598 (SMART); IPR003599 (SMART); IPR013783 (G3DSA:2.60.40.GENE3D); IPR013783 (G3DSA:2.60.40.GENE3D); IPR013783 (G3DSA:2.60.40.GENE3D); IPR013783 (G3DSA:2.60.40.GENE3D); IPR013098 (PFAM); PF13895 (PFAM); IPR013783 (G3DSA:2.60.40.GENE3D); PTHR10489 (PANTHER); NON_CYTOPLASMIC_DOMAIN (PHOBIUS); SIGNAL_PEPTIDE (PHOBIUS); SIGNAL_PEPTIDE_C_REGION (PHOBIUS); SIGNAL_PEPTIDE_N_REGIO…
Aqu2.1.32690_001	FOXD3	418	20	0	0.756	27	P:GO:0001829; P:GO:0030513; P:GO:0000122; P:GO:0050935; P:GO:0060678; P:GO:0072210; P:GO:0001892; P:GO:0072076; P:GO:0072267; P:GO:0051216; P:GO:0001755; P:GO:0090184; C:GO:0005667; P:GO:0030318; P:GO:0048937; P:GO:0051090; F:GO:0003705; P:GO:0007422; F:GO:0043565; P:GO:0048846; P:GO:0048484; P:GO:0045944; F:GO:0003690; F:GO:0008134; C:GO:0005634; F:GO:0008301; P:GO:0048485	-	IPR001766 (PRINTS); IPR001766 (SMART); IPR011991 (G3DSA:1.10.10.GENE3D); IPR001766 (PFAM); PTHR11829:SF83 (PANTHER); PTHR11829 (PANTHER); IPR018122 (PROSITE_PATTERNS); IPR018122 (PROSITE_PATTERNS); IPR001766 (PROSITE_PROFILES); SSF46785 (SUPERFAMILY)
Aqu2.1.32701_001	---NA---	433	0			0	-		SIGNAL_PEPTIDE_C_REGION (PHOBIUS); NON_CYTOPLASMIC_DOMAIN (PHOBIUS); SIGNAL_PEPTIDE_H_REGION (PHOBIUS); SIGNAL_PEPTIDE_N_REGION (PHOBIUS); SIGNAL_PEPTIDE (PHOBIUS); CYTOPLASMIC_DOMAIN (PHOBIUS); TRANSMEMBRANE (PHOBIUS); SignalP-noTM (SIGNALP_EUK); TMhelix (TMHMM)
Aqu2.1.32744_001	kelch domain-containing protein 3	390	20	0	0.513	1	F:GO:0005515		IPR015916 (G3DSA:2.130.10.GENE3D); PF13854 (PFAM); IPR011498 (PFAM); PF13418 (PFAM); IPR015915 (G3DSA:2.120.10.GENE3D); PTHR23244 (PANTHER); SSF117281 (SUPERFAMILY)
Aqu2.1.32858_001	---NA---	63	0			0	-		no IPS match
Aqu2.1.32869_001	ylp motif-containing protein 1	584	20	0	0.6405	5	P:GO:0000122; F:GO:0005515; P:GO:0032204; F:GO:0001078; C:GO:0005634	-	PF13671 (PFAM); G3DSA:3.40.50.300 (GENE3D); PTHR13413:SF0 (PANTHER); IPR026314 (PANTHER); IPR027417 (SUPERFAMILY)
Aqu2.1.32870_001	---NA---	132	0			0	-		Coil (COILS)
Aqu2.1.32872_001	tpr and ankyrin repeat-containing protein 1	2286	20	0	0.4985	2	F:GO:0016787; F:GO:0005524		Coil (COILS); IPR014017 (PFAM); IPR020683 (G3DSA:1.25.40.GENE3D); G3DSA:3.40.50.300 (GENE3D); G3DSA:3.40.50.300 (GENE3D); PTHR21529:SF0 (PANTHER); IPR026654 (PANTHER); CYTOPLASMIC_DOMAIN (PHOBIUS); TRANSMEMBRANE (PHOBIUS); NON_CYTOPLASMIC_DOMAIN (PHOBIUS); IPR020683 (SUPERFAMILY); IPR027417 (SUPERFAMILY)
Aqu2.1.32878_001	---NA---	76	0			0	-		SIGNAL_PEPTIDE_N_REGION (PHOBIUS); SIGNAL_PEPTIDE (PHOBIUS); TRANSMEMBRANE (PHOBIUS); SIGNAL_PEPTIDE_C_REGION (PHOBIUS); CYTOPLASMIC_DOMAIN (PHOBIUS); NON_CYTOPLASMIC_DOMAIN (PHOBIUS); SIGNAL_PEPTIDE_H_REGION (PHOBIUS); SignalP-TM (SIGNALP_EUK); SignalP-TM (SIGNALP_GRAM_POSITIVE); SignalP-TM (SIGNALP_GRAM_NEGATIVE); TMhelix (TMHMM); TMhelix (TMHMM)
Aqu2.1.32901_001	phd finger protein 3 isoform x1	1254	20	0	0.5165	4	P:GO:0006351; F:GO:0008270; F:GO:0005515; C:GO:0005634	-	IPR001965 (SMART); IPR017890 (SMART); IPR003618 (PFAM); IPR013083 (G3DSA:3.30.40.GENE3D); IPR012921 (PFAM); IPR019787 (PFAM); IPR003618 (G3DSA:1.10.472.GENE3D); PTHR14914 (PANTHER); IPR019786 (PROSITE_PATTERNS); IPR019787 (PROSITE_PROFILES); IPR003618 (PROSITE_PROFILES); IPR011011 (SUPERFAMILY); IPR003618 (SUPERFAMILY); SSF160481 (SUPERFAMILY)
Aqu2.1.32925_001	sid1 transmembrane family member 1	1025	20	0	0.613	3	P:GO:0033227; F:GO:0051033; C:GO:0016021		Coil (COILS); IPR025958 (PFAM); PTHR12185 (PANTHER); NON_CYTOPLASMIC_DOMAIN (PHOBIUS); CYTOPLASMIC_DOMAIN (PHOBIUS); SIGNAL_PEPTIDE_H_REGION (PHOBIUS); CYTOPLASMIC_DOMAIN (PHOBIUS); NON_CYTOPLASMIC_DOMAIN (PHOBIUS); TRANSMEMBRANE (PHOBIUS); TRANSMEMBRANE (PHOBIUS); CYTOPLASMIC_DOMAIN (PHOBIUS); SIGNAL_PEPTIDE_C_REGION (PHOBIUS); TRANSMEMBRANE (PHOBIUS); CYTOPLASMIC_DOMAIN (PHOBIUS); TRANSMEMBRANE…
Aqu2.1.32926_001	sid1 transmembrane family member 1	969	20	1.62367e-143	0.575	3	P:GO:0033227; F:GO:0051033; C:GO:0016021		Coil (COILS); IPR025958 (PFAM); PTHR12185 (PANTHER); NON_CYTOPLASMIC_DOMAIN (PHOBIUS); CYTOPLASMIC_DOMAIN (PHOBIUS); TRANSMEMBRANE (PHOBIUS); NON_CYTOPLASMIC_DOMAIN (PHOBIUS); TRANSMEMBRANE (PHOBIUS); TRANSMEMBRANE (PHOBIUS); SIGNAL_PEPTIDE_N_REGION (PHOBIUS); TRANSMEMBRANE (PHOBIUS); NON_CYTOPLASMIC_DOMAIN (PHOBIUS); TRANSMEMBRANE (PHOBIUS); CYTOPLASMIC_DOMAIN (PHOBIUS); SIGNAL_PEPTIDE_C_REGION …
Aqu2.1.32932_001	coatomer subunit delta	512	20	0	0.788	15	P:GO:0055085; C:GO:0030126; C:GO:0005829; P:GO:0008344; C:GO:0016021; P:GO:0043473; P:GO:0006890; F:GO:0022857; P:GO:0006891; C:GO:0030131; P:GO:0021691; F:GO:0005515; P:GO:0048205; P:GO:0006886; C:GO:0005783	-	Coil (COILS); IPR022775 (PFAM); G3DSA:3.30.450.60 (GENE3D); IPR008968 (PFAM); PTHR10121:SF0 (PANTHER); IPR027059 (PANTHER); SIGNAL_PEPTIDE_C_REGION (PHOBIUS); NON_CYTOPLASMIC_DOMAIN (PHOBIUS); SIGNAL_PEPTIDE_N_REGION (PHOBIUS); SIGNAL_PEPTIDE (PHOBIUS); SIGNAL_PEPTIDE_H_REGION (PHOBIUS); IPR028565 (PROSITE_PROFILES); IPR011012 (SUPERFAMILY); IPR028565 (SUPERFAMILY)
Aqu2.1.32933_001	BSX	403	20	0	0.6295	6	F:GO:0003700; F:GO:0043565; C:GO:0005634; P:GO:0006355; C:GO:0005667; P:GO:0045449	-	IPR020479 (PRINTS); IPR001356 (SMART); IPR001356 (PFAM); IPR009057 (G3DSA:1.10.10.GENE3D); PTHR24327:SF3 (PANTHER); PTHR24327 (PANTHER); IPR017970 (PROSITE_PATTERNS); IPR001356 (PROSITE_PROFILES); IPR009057 (SUPERFAMILY)
Aqu2.1.32959_001	cationic amino acid transporter	174	20	2.37137e-118	0.596	3	P:GO:0003333; F:GO:0015171; C:GO:0016021	-	PF13906 (PFAM); IPR002293 (PANTHER); PTHR11785:SF177 (PANTHER); TRANSMEMBRANE (PHOBIUS); NON_CYTOPLASMIC_DOMAIN (PHOBIUS); CYTOPLASMIC_DOMAIN (PHOBIUS); TRANSMEMBRANE (PHOBIUS); CYTOPLASMIC_DOMAIN (PHOBIUS); CYTOPLASMIC_DOMAIN (PHOBIUS); NON_CYTOPLASMIC_DOMAIN (PHOBIUS); TRANSMEMBRANE (PHOBIUS); TRANSMEMBRANE (PHOBIUS); TMhelix (TMHMM); TMhelix (TMHMM); TMhelix (TMHMM); TMhelix (TMHMM)
Aqu2.1.32960_001	RCOR2	438	20	0	0.6295	5	P:GO:1900052; F:GO:0003677; F:GO:0003682; C:GO:0005634; C:GO:0000785	-	Coil (COILS); IPR001005 (SMART); IPR009057 (G3DSA:1.10.10.GENE3D); IPR000949 (PFAM); PTHR16089 (PANTHER); PTHR16089:SF16 (PANTHER); IPR017884 (PROSITE_PROFILES); IPR000949 (PROSITE_PROFILES); IPR017884 (PROSITE_PROFILES); IPR009057 (SUPERFAMILY); IPR009057 (SUPERFAMILY)
Aqu2.1.32962_001	endoplasmic reticulum lectin 1	465	20	0	0.521	3	C:GO:0005788; P:GO:0030433; F:GO:0001948		G3DSA:2.70.130.10 (GENE3D); IPR012913 (PFAM); PTHR15414 (PANTHER); SIGNAL_PEPTIDE_H_REGION (PHOBIUS); NON_CYTOPLASMIC_DOMAIN (PHOBIUS); SIGNAL_PEPTIDE_N_REGION (PHOBIUS); SIGNAL_PEPTIDE_C_REGION (PHOBIUS); SIGNAL_PEPTIDE (PHOBIUS); SignalP-noTM (SIGNALP_EUK); IPR009011 (SUPERFAMILY)
Aqu2.1.32981_001	methyltransferase	289	20	1.78494e-24	0.543	3	F:GO:0008168; F:GO:0016740; P:GO:0032259		G3DSA:3.40.50.150 (GENE3D); IPR025714 (PFAM); PTHR10108 (PANTHER); SSF53335 (SUPERFAMILY)
Aqu2.1.32998_001	---NA---	25	0			0	-		no IPS match
Aqu2.1.32999_001	adhesin-like protein	641	17	3.18832e-34	0.414118	1	C:GO:0005727		PF13229 (PFAM); SIGNAL_PEPTIDE_C_REGION (PHOBIUS); SIGNAL_PEPTIDE_H_REGION (PHOBIUS); SIGNAL_PEPTIDE_N_REGION (PHOBIUS); NON_CYTOPLASMIC_DOMAIN (PHOBIUS); SIGNAL_PEPTIDE (PHOBIUS); SignalP-noTM (SIGNALP_GRAM_NEGATIVE); SignalP-noTM (SIGNALP_EUK); SignalP-TM (SIGNALP_GRAM_POSITIVE); IPR011050 (SUPERFAMILY)
Aqu2.1.33009_001	uncharacterized protein loc101237989	149	20	5.10026e-45	0.6075	3	F:GO:0003723; P:GO:0006278; F:GO:0003964		no IPS match
Aqu2.1.33012_001	sodium leak channel non-selective protein	1879	20	1.69114e-147	0.4635	5	F:GO:0005515; P:GO:0006811; C:GO:0016020; P:GO:0055085; F:GO:0005261		Coil (COILS); IPR002110 (SMART); IPR020683 (G3DSA:1.25.40.GENE3D); IPR005821 (PFAM); IPR020683 (PFAM); PTHR10037 (PANTHER); IPR028823 (PTHR10037:PANTHER); CYTOPLASMIC_DOMAIN (PHOBIUS); CYTOPLASMIC_DOMAIN (PHOBIUS); TRANSMEMBRANE (PHOBIUS); NON_CYTOPLASMIC_DOMAIN (PHOBIUS); CYTOPLASMIC_DOMAIN (PHOBIUS); TRANSMEMBRANE (PHOBIUS); NON_CYTOPLASMIC_DOMAIN (PHOBIUS); CYTOPLASMIC_DOMAIN (PHOBIUS); CYTOPL…
Aqu2.1.33013_001	competence protein	135	13	0.000122598	0.635385	0	-		no IPS match
Aqu2.1.33014_001	competence protein	313	20	1.34944e-16	0.4355	1	F:GO:0016787		NON_CYTOPLASMIC_DOMAIN (PHOBIUS); SIGNAL_PEPTIDE_N_REGION (PHOBIUS); SIGNAL_PEPTIDE (PHOBIUS); SIGNAL_PEPTIDE_C_REGION (PHOBIUS); SIGNAL_PEPTIDE_H_REGION (PHOBIUS); SignalP-noTM (SIGNALP_EUK); SSF56281 (SUPERFAMILY)
Aqu2.1.33015_001	---NA---	69	0			0	-		no IPS match
Aqu2.1.33029_001	protein fam76b	94	20	2.54622e-50	0.514	3	F:GO:0003674; P:GO:0008150; C:GO:0005575		PTHR22875:SF1 (PANTHER); PTHR22875 (PANTHER)
Aqu2.1.33032_001	protein fam76b	114	20	1.43458e-49	0.62	4	F:GO:0003674; P:GO:0008150; C:GO:0005575; C:GO:0016607		no IPS match
Aqu2.1.33061_001	serine threonine-protein kinase lats1-like	833	20	0	0.729	8	P:GO:0048519; P:GO:0006468; F:GO:0004674; F:GO:0005524; P:GO:0009069; P:GO:0035329; P:GO:0007067; F:GO:0005515	EC:2.7.11.0	Coil (COILS); IPR015940 (SMART); IPR000961 (SMART); IPR002290 (SMART); IPR000719 (PFAM); G3DSA:3.30.200.20 (GENE3D); G3DSA:1.10.510.10 (GENE3D); G3DSA:1.10.8.10 (GENE3D); PTHR24356 (PANTHER); IPR028742 (PTHR24356:PANTHER); IPR008271 (PROSITE_PATTERNS); IPR017441 (PROSITE_PATTERNS); IPR000961 (PROSITE_PROFILES); IPR015940 (PROSITE_PROFILES); IPR000719 (PROSITE_PROFILES); IPR009060 (SUPERFAMILY); I…
Aqu2.1.33095_001	PREDICTED: hypothetical protein LOC100640919 [Amphimedon queenslandica]	686	1	8.53308e-76	0.6	0	-		Coil (COILS); Coil (COILS)
Aqu2.1.33122_001	ankyrin repeat domain-containing protein 50- partial	379	20	2.81678e-159	0.615	2	F:GO:0005515; P:GO:0007165		IPR011029 (G3DSA:1.10.533.GENE3D); IPR000488 (PFAM); IPR000488 (PROSITE_PROFILES); IPR011029 (SUPERFAMILY)
Aqu2.1.33181_001	s chain structural evidence for feedback activation by rasgtp of the ras-specific nucleotide exchange factor sos	301	11	5.61273e-15	0.444545	3	F:GO:0005085; C:GO:0005622; P:GO:0007264		G3DSA:1.20.870.10 (GENE3D); IPR001895 (G3DSA:1.10.840.GENE3D); IPR015759 (PTHR23113:PANTHER); IPR008937 (PANTHER); SignalP-TM (SIGNALP_GRAM_POSITIVE); IPR023578 (SUPERFAMILY)
Aqu2.1.33277_001	annexin a11-like	204	11	2.44938e-16	0.630909	5	C:GO:0016021; F:GO:0004930; P:GO:0007186; F:GO:0005509; F:GO:0005544		SIGNAL_PEPTIDE_C_REGION (PHOBIUS); NON_CYTOPLASMIC_DOMAIN (PHOBIUS); SIGNAL_PEPTIDE_N_REGION (PHOBIUS); SIGNAL_PEPTIDE (PHOBIUS); SIGNAL_PEPTIDE_H_REGION (PHOBIUS); SignalP-noTM (SIGNALP_GRAM_NEGATIVE); SignalP-TM (SIGNALP_GRAM_POSITIVE)
Aqu2.1.33325_001	general transcription factor 3c polypeptide 3	875	20	6.73506e-133	0.489	1	F:GO:0005515		IPR019734 (SMART); IPR011990 (G3DSA:1.25.40.GENE3D); PTHR23082 (PANTHER); IPR019734 (PROSITE_PROFILES); IPR013026 (PROSITE_PROFILES); IPR019734 (PROSITE_PROFILES); IPR019734 (PROSITE_PROFILES); IPR019734 (PROSITE_PROFILES); IPR013026 (PROSITE_PROFILES); IPR019734 (PROSITE_PROFILES); IPR013026 (PROSITE_PROFILES); SSF48452 (SUPERFAMILY); SSF48452 (SUPERFAMILY)
Aqu2.1.33382_001	peptidase s8	883	20	0	0.5635	2	P:GO:0006508; F:GO:0004252	-	IPR015500 (PRINTS); IPR000209 (G3DSA:3.40.50.GENE3D); IPR000209 (PFAM); IPR015500 (PANTHER); IPR023828 (PROSITE_PATTERNS); IPR000209 (SUPERFAMILY)
Aqu2.1.33402_001	receptor-type tyrosine-protein phosphatase f-like	1017	20	9.96199e-97	0.5315	1	F:GO:0005515		IPR003961 (SMART); IPR013783 (G3DSA:2.60.40.GENE3D); IPR013783 (G3DSA:2.60.40.GENE3D); IPR003961 (PFAM); IPR013783 (G3DSA:2.60.40.GENE3D); IPR013783 (G3DSA:2.60.40.GENE3D); PTHR10489 (PANTHER); SIGNAL_PEPTIDE_C_REGION (PHOBIUS); CYTOPLASMIC_DOMAIN (PHOBIUS); TRANSMEMBRANE (PHOBIUS); SIGNAL_PEPTIDE_H_REGION (PHOBIUS); SIGNAL_PEPTIDE_N_REGION (PHOBIUS); NON_CYTOPLASMIC_DOMAIN (PHOBIUS); SIGNAL_PEPT…
Aqu2.1.33434_001	PREDICTED: hypothetical protein LOC100634052, partial [Amphimedon queenslandica]	294	2	1.71913e-15	0.5	0	-		Coil (COILS); SIGNAL_PEPTIDE_N_REGION (PHOBIUS); SIGNAL_PEPTIDE (PHOBIUS); SIGNAL_PEPTIDE_C_REGION (PHOBIUS); NON_CYTOPLASMIC_DOMAIN (PHOBIUS); SIGNAL_PEPTIDE_H_REGION (PHOBIUS); TMhelix (TMHMM)
Aqu2.1.33439_001	protocadherin fat 4 isoform x1	7157	20	0	0.496	4	F:GO:0005509; P:GO:0007156; F:GO:0005515; C:GO:0005886		Coil (COILS); IPR002126 (PRINTS); IPR002126 (SMART); IPR002126 (G3DSA:2.60.40.GENE3D); IPR013783 (G3DSA:2.60.40.GENE3D); IPR013783 (G3DSA:2.60.40.GENE3D); IPR002126 (G3DSA:2.60.40.GENE3D); IPR002909 (PFAM); IPR002893 (PFAM); IPR002126 (G3DSA:2.60.40.GENE3D); IPR002126 (PFAM); PTHR24027:SF132 (PANTHER); PTHR24027 (PANTHER); IPR020894 (PROSITE_PATTERNS); IPR020894 (PROSITE_PATTERNS); IPR020894 (PRO…
Aqu2.1.33448_001	fibrocystin-l	4758	20	0	0.546	1	F:GO:0005515		IPR002909 (SMART); IPR001283 (SMART); IPR006626 (SMART); IPR014044 (G3DSA:3.40.33.GENE3D); IPR005301 (PFAM); IPR002909 (PFAM); IPR014044 (PFAM); IPR013783 (G3DSA:2.60.40.GENE3D); IPR008972 (G3DSA:2.60.40.GENE3D); IPR019316 (PFAM); IPR011658 (PFAM); IPR011658 (G3DSA:3.90.182.GENE3D); IPR005301 (G3DSA:1.20.140.GENE3D); IPR013783 (G3DSA:2.60.40.GENE3D); IPR013783 (G3DSA:2.60.40.GENE3D); IPR013783 (G…
Aqu2.1.33460_001	beta- -n-acetylglucosaminyltransferase lunatic fringe-like	518	20	0	0.506	11	P:GO:0035114; P:GO:0007450; P:GO:0035220; C:GO:0016020; C:GO:0044431; F:GO:0008194; P:GO:0044702; P:GO:0035120; P:GO:0048609; P:GO:0007560; P:GO:0008593	-	IPR003378 (PFAM); PTHR10811 (PANTHER); TRANSMEMBRANE (PHOBIUS); CYTOPLASMIC_DOMAIN (PHOBIUS); TRANSMEMBRANE (PHOBIUS); NON_CYTOPLASMIC_DOMAIN (PHOBIUS); CYTOPLASMIC_DOMAIN (PHOBIUS); TMhelix (TMHMM); TMhelix (TMHMM)
Aqu2.1.33466_001	---NA---	48	0			0	-		SIGNAL_PEPTIDE_C_REGION (PHOBIUS); SIGNAL_PEPTIDE_N_REGION (PHOBIUS); SIGNAL_PEPTIDE (PHOBIUS); SIGNAL_PEPTIDE_H_REGION (PHOBIUS); NON_CYTOPLASMIC_DOMAIN (PHOBIUS); TMhelix (TMHMM)
Aqu2.1.33474_001	glycoside hydrolase 15-like protein	276	20	7.02146e-144	0.6225	1	F:GO:0003824	-	IPR006869 (PFAM); PTHR23054:SF0 (PANTHER); PTHR23054 (PANTHER)
Aqu2.1.33495_001	---NA---	26	0			0	-		no IPS match
Aqu2.1.33506_001	testis-specific serine threonine-protein kinase 1-like	425	20	0	0.651	4	P:GO:0006468; F:GO:0005524; F:GO:0004674; P:GO:0009069	EC:2.7.11.0	IPR002290 (SMART); IPR000719 (PFAM); G3DSA:3.30.200.20 (GENE3D); G3DSA:1.10.510.10 (GENE3D); PTHR24343 (PANTHER); IPR008271 (PROSITE_PATTERNS); IPR017441 (PROSITE_PATTERNS); IPR000719 (PROSITE_PROFILES); IPR011009 (SUPERFAMILY)
Aqu2.1.33507_001	vacuolar protein sorting-associated protein 13a isoform x3	3562	20	0	0.4695	0	-		Coil (COILS); IPR009543 (PFAM); IPR026847 (PANTHER); NON_CYTOPLASMIC_DOMAIN (PHOBIUS); SIGNAL_PEPTIDE_N_REGION (PHOBIUS); SIGNAL_PEPTIDE (PHOBIUS); SIGNAL_PEPTIDE_C_REGION (PHOBIUS); SIGNAL_PEPTIDE_H_REGION (PHOBIUS)
Aqu2.1.33518_001	fibrillin-1- partial	2925	20	0	0.604	7	F:GO:0005509; C:GO:0016020; F:GO:0004888; P:GO:0007596; F:GO:0005515; C:GO:0005578; F:GO:0005201	-	IPR001491 (PRINTS); IPR001881 (SMART); IPR000742 (SMART); IPR011398 (PIRSF); PF14670 (PFAM); IPR018864 (PFAM); IPR026823 (PFAM); G3DSA:2.10.25.10 (GENE3D); G3DSA:2.10.25.10 (GENE3D); G3DSA:2.10.25.10 (GENE3D); G3DSA:2.10.25.10 (GENE3D); IPR001881 (PFAM); G3DSA:2.10.25.10 (GENE3D); G3DSA:2.10.25.10 (GENE3D); G3DSA:2.10.25.10 (GENE3D); G3DSA:2.10.25.10 (GENE3D); IPR011398 (PANTHER); IPR013032 (PROS…
Aqu2.1.33521_001	activating signal cointegrator 1 complex subunit 2 homolog	1182	6	5.44282e-20	0.621667	3	F:GO:0004672; P:GO:0006468; F:GO:0005515	-	Coil (COILS); Coil (COILS); IPR000210 (SMART); IPR002110 (SMART); IPR020683 (G3DSA:1.25.40.GENE3D); IPR020683 (PFAM); IPR011333 (G3DSA:3.30.710.GENE3D); IPR013069 (PFAM); IPR000210 (PROSITE_PROFILES); IPR020683 (PROSITE_PROFILES); IPR002110 (PROSITE_PROFILES); IPR011333 (SUPERFAMILY); IPR020683 (SUPERFAMILY)
Aqu2.1.33525_001	serine threonine protein kinase 3	189	20	3.80175e-125	0.567	3	F:GO:0016772; F:GO:0005543; P:GO:0050794	-	IPR001849 (SMART); IPR011993 (G3DSA:2.30.29.GENE3D); IPR001849 (PFAM); PTHR12092 (PANTHER); IPR001849 (PROSITE_PROFILES); SSF50729 (SUPERFAMILY)
Aqu2.1.33558_001	zinc finger cchc domain-containing protein 24-like	275	20	7.50722e-16	0.5745	2	F:GO:0003676; F:GO:0008270		no IPS match
Aqu2.1.33565_001	splicing factor 3b subunit 1-like	742	20	0	0.933	3	C:GO:0019013; C:GO:0030529; F:GO:0005488	-	IPR011989 (G3DSA:1.25.10.GENE3D); PTHR12097 (PANTHER); CYTOPLASMIC_DOMAIN (PHOBIUS); NON_CYTOPLASMIC_DOMAIN (PHOBIUS); TRANSMEMBRANE (PHOBIUS); NON_CYTOPLASMIC_DOMAIN (PHOBIUS); TRANSMEMBRANE (PHOBIUS); IPR016024 (SUPERFAMILY)
Aqu2.1.33591_001	d-3-phosphoglycerate dehydrogenase	327	20	0	0.7745	13	C:GO:0005829; F:GO:0051287; P:GO:0055114; P:GO:0022008; P:GO:0007420; F:GO:0004617; F:GO:0009055; P:GO:0034641; P:GO:0048468; P:GO:0006564; P:GO:0006544; P:GO:0006566; P:GO:0006118	EC:1.1.1.95	IPR016040 (G3DSA:3.40.50.GENE3D); IPR006139 (PFAM); IPR006140 (PFAM); IPR006236 (PTHR10996:PANTHER); PTHR10996 (PANTHER); IPR006140 (PROSITE_PATTERNS); IPR006140 (PROSITE_PATTERNS); IPR006140 (PROSITE_PATTERNS); SSF51735 (SUPERFAMILY); SSF52283 (SUPERFAMILY)
Aqu2.1.33601_001	sterol o-acyltransferase 1	454	20	1.89233e-98	0.4785	3	F:GO:0008374; P:GO:0008202; P:GO:0042967	-	IPR004299 (PFAM); IPR014371 (PANTHER); NON_CYTOPLASMIC_DOMAIN (PHOBIUS); TRANSMEMBRANE (PHOBIUS); NON_CYTOPLASMIC_DOMAIN (PHOBIUS); CYTOPLASMIC_DOMAIN (PHOBIUS); TRANSMEMBRANE (PHOBIUS); CYTOPLASMIC_DOMAIN (PHOBIUS); TRANSMEMBRANE (PHOBIUS); TRANSMEMBRANE (PHOBIUS); NON_CYTOPLASMIC_DOMAIN (PHOBIUS); NON_CYTOPLASMIC_DOMAIN (PHOBIUS); TRANSMEMBRANE (PHOBIUS); CYTOPLASMIC_DOMAIN (PHOBIUS); TRANSMEMB…
Aqu2.1.33603_001	glutamate-rich protein 2	142	20	1.80343e-11	0.6435	0	-		IPR026703 (PANTHER); PTHR21520:SF0 (PANTHER)
Aqu2.1.33626_001	uncharacterized protein loc102807910	239	20	3.75386e-173	0.4935	4	P:GO:0006810; C:GO:0005737; C:GO:0016021; F:GO:0005215	-	PF02157 (PFAM); IPR000479 (PFAM); G3DSA:2.70.130.10 (GENE3D); PTHR15071 (PANTHER); SIGNAL_PEPTIDE_H_REGION (PHOBIUS); TRANSMEMBRANE (PHOBIUS); SIGNAL_PEPTIDE_N_REGION (PHOBIUS); SIGNAL_PEPTIDE (PHOBIUS); NON_CYTOPLASMIC_DOMAIN (PHOBIUS); CYTOPLASMIC_DOMAIN (PHOBIUS); SIGNAL_PEPTIDE_C_REGION (PHOBIUS); SignalP-noTM (SIGNALP_GRAM_NEGATIVE); SignalP-noTM (SIGNALP_EUK); SignalP-TM (SIGNALP_GRAM_POSIT…
Aqu2.1.33639_001	---NA---	44	0			0	-		no IPS match
Aqu2.1.33643_001	primary ciliary dyskinesia protein 1-like	856	20	0	0.53	0	-		IPR008962 (G3DSA:2.60.40.GENE3D)
Aqu2.1.33644_001	slit like protein 3 protein	681	2	9.1667e-22	0.535	0	-		SIGNAL_PEPTIDE_N_REGION (PHOBIUS); SIGNAL_PEPTIDE (PHOBIUS); SIGNAL_PEPTIDE_C_REGION (PHOBIUS); SIGNAL_PEPTIDE_H_REGION (PHOBIUS); NON_CYTOPLASMIC_DOMAIN (PHOBIUS); SignalP-noTM (SIGNALP_EUK); SSF111418 (SUPERFAMILY)
Aqu2.1.33679_001	PREDICTED: hypothetical protein LOC100633636 [Amphimedon queenslandica]	614	1	0	1	0	-		Coil (COILS); Coil (COILS); Coil (COILS); Coil (COILS); Coil (COILS)
Aqu2.1.33710_001	major vault protein	63	20	4.99751e-21	0.817	3	C:GO:0005634; C:GO:0005737; C:GO:0030529	-	Coil (COILS); PTHR14165 (PANTHER)
Aqu2.1.33713_001	PREDICTED: hypothetical protein LOC100634772 [Amphimedon queenslandica]	473	3	1.25041e-163	0.746667	1	F:GO:0005515		IPR003599 (SMART); IPR013783 (G3DSA:2.60.40.GENE3D); IPR013783 (G3DSA:2.60.40.GENE3D); PF13895 (PFAM); TRANSMEMBRANE (PHOBIUS); NON_CYTOPLASMIC_DOMAIN (PHOBIUS); CYTOPLASMIC_DOMAIN (PHOBIUS); IPR007110 (PROSITE_PROFILES); IPR007110 (PROSITE_PROFILES); SSF48726 (SUPERFAMILY); SSF48726 (SUPERFAMILY); TMhelix (TMHMM)
Aqu2.1.33723_001	nadh dehydrogenase	468	20	0	0.8855	7	P:GO:0006979; F:GO:0051287; F:GO:0048038; C:GO:0005747; P:GO:0055114; F:GO:0003954; P:GO:0006118	EC:1.6.99.3	IPR001135 (PFAM); G3DSA:1.10.645.10 (GENE3D); IPR022885 (TIGRFAM); PTHR11993 (PANTHER); PTHR11993:SF10 (PANTHER); IPR014029 (PROSITE_PATTERNS); IPR022885 (HAMAP); SSF56762 (SUPERFAMILY)
Aqu2.1.33730_001	dna repair protein xrcc1	451	20	0	0.5555	3	F:GO:0003684; P:GO:0000012; C:GO:0005634		IPR001357 (SMART); IPR001357 (G3DSA:3.40.50.GENE3D); IPR002706 (PFAM); IPR008979 (G3DSA:2.60.120.GENE3D); IPR001357 (PFAM); PTHR11370 (PANTHER); PTHR11370:SF0 (PANTHER); IPR001357 (PROSITE_PROFILES); IPR001357 (SUPERFAMILY); IPR008979 (SUPERFAMILY)
Aqu2.1.33760_001	hemicentin-1	1541	20	1.01135e-60	0.416	1	F:GO:0005515		Coil (COILS); Coil (COILS); IPR003599 (SMART); IPR003598 (SMART); IPR003961 (SMART); IPR013783 (G3DSA:2.60.40.GENE3D); IPR013783 (G3DSA:2.60.40.GENE3D); IPR013783 (G3DSA:2.60.40.GENE3D); PF13895 (PFAM); IPR003961 (PFAM); IPR013098 (PFAM); IPR013783 (G3DSA:2.60.40.GENE3D); IPR013783 (G3DSA:2.60.40.GENE3D); IPR013783 (G3DSA:2.60.40.GENE3D); PF13927 (PFAM); IPR013783 (G3DSA:2.60.40.GENE3D); IPR01378…
Aqu2.1.33872_001	proteasome-associated protein ecm29 homolog	1505	20	0	0.569	11	C:GO:0005769; C:GO:0030134; C:GO:0005771; C:GO:0030139; C:GO:0005813; P:GO:0030433; C:GO:0000502; C:GO:0005634; C:GO:0005783; C:GO:0005802; F:GO:0005488	-	IPR024372 (PFAM); IPR011989 (G3DSA:1.25.10.GENE3D); IPR026827 (PANTHER); PTHR23346:SF2 (PANTHER); IPR016024 (SUPERFAMILY); IPR016024 (SUPERFAMILY); IPR016024 (SUPERFAMILY)
Aqu2.1.33873_001	wd repeat-containing protein 63- partial	269	17	0	0.637059	2	F:GO:0005524; P:GO:0007165		Coil (COILS)
Aqu2.1.33876_001	protein fam91a1	830	20	0	0.6525	3	F:GO:0003674; P:GO:0008150; C:GO:0005575		IPR028091 (PFAM); IPR028097 (PFAM); IPR028093 (PANTHER); PTHR32477:SF0 (PANTHER)
Aqu2.1.33896_001	deleted in malignant brain tumors 1	588	20	0	0.604	5	C:GO:0016020; F:GO:0005044; P:GO:0006508; F:GO:0004222; F:GO:0008270	-	IPR001190 (PRINTS); IPR001506 (PRINTS); IPR017448 (SMART); IPR006026 (SMART); IPR024079 (G3DSA:3.40.390.GENE3D); G3DSA:3.10.250.10 (GENE3D); IPR001190 (PFAM); IPR001506 (PFAM); PTHR19331 (PANTHER); IPR001190 (PROSITE_PATTERNS); NON_CYTOPLASMIC_DOMAIN (PHOBIUS); SIGNAL_PEPTIDE_H_REGION (PHOBIUS); SIGNAL_PEPTIDE_C_REGION (PHOBIUS); SIGNAL_PEPTIDE (PHOBIUS); SIGNAL_PEPTIDE_N_REGION (PHOBIUS); IPR001…
Aqu2.1.33904_001	deleted in malignant brain tumors 1	572	20	2.61207e-31	0.4385	2	C:GO:0016020; F:GO:0005044		IPR001190 (PRINTS); IPR017448 (SMART); G3DSA:3.10.250.10 (GENE3D); IPR001190 (PFAM); PTHR19331:SF8 (PANTHER); PTHR19331 (PANTHER); SIGNAL_PEPTIDE (PHOBIUS); SIGNAL_PEPTIDE_C_REGION (PHOBIUS); NON_CYTOPLASMIC_DOMAIN (PHOBIUS); SIGNAL_PEPTIDE_H_REGION (PHOBIUS); SIGNAL_PEPTIDE_N_REGION (PHOBIUS); IPR001190 (PROSITE_PROFILES); IPR001190 (PROSITE_PROFILES); IPR001190 (PROSITE_PROFILES); SignalP-noTM …
Aqu2.1.33910_001	dual specificity tyrosine-phosphorylation-regulated kinase 4-like	751	20	0	0.8065	4	P:GO:0006468; F:GO:0005524; F:GO:0004674; P:GO:0009069	EC:2.7.11.0	IPR002290 (SMART); G3DSA:3.30.200.20 (GENE3D); G3DSA:1.10.510.10 (GENE3D); IPR000719 (PFAM); PTHR24058:SF37 (PANTHER); PTHR24058 (PANTHER); IPR008271 (PROSITE_PATTERNS); IPR017441 (PROSITE_PATTERNS); IPR000719 (PROSITE_PROFILES); IPR011009 (SUPERFAMILY)
Aqu2.1.33929_001	---NA---	704	0			0	-		no IPS match
Aqu2.1.33930_001	vacuolar protein sorting-associated protein 11 homolog	902	20	0	0.6435	12	P:GO:0016192; P:GO:0030318; P:GO:0003407; F:GO:0008270; P:GO:0001889; P:GO:0060036; P:GO:0010507; P:GO:0048794; P:GO:1902362; P:GO:0003406; P:GO:0006886; F:GO:0005515	-	Coil (COILS); IPR001841 (SMART); IPR000547 (PFAM); IPR015943 (G3DSA:2.130.10.GENE3D); IPR024763 (PFAM); IPR013083 (G3DSA:3.30.40.GENE3D); PTHR23323:SF24 (PANTHER); PTHR23323 (PANTHER); IPR000547 (PROSITE_PROFILES); IPR001841 (PROSITE_PROFILES); IPR017986 (SUPERFAMILY); SSF57850 (SUPERFAMILY); IPR016024 (SUPERFAMILY)
Aqu2.1.33938_001	ef-hand domain-containing protein 1	323	20	0	0.7905	1	F:GO:0005509	-	IPR006602 (SMART); IPR010554 (PFAM); PTHR12086 (PANTHER); PTHR12086:SF1 (PANTHER); IPR006602 (PROSITE_PROFILES)
Aqu2.1.33973_001	---NA---	76	0			0	-		no IPS match
Aqu2.1.34032_001	---NA---	59	0			0	-		NON_CYTOPLASMIC_DOMAIN (PHOBIUS); TRANSMEMBRANE (PHOBIUS); CYTOPLASMIC_DOMAIN (PHOBIUS); TMhelix (TMHMM)
Aqu2.1.34034_001	---NA---	219	0			0	-		no IPS match
Aqu2.1.34056_001	uncharacterized protein loc100211034	72	20	1.25459e-22	0.6555	3	P:GO:0006259; F:GO:0003676; F:GO:0003824	-	no IPS match
Aqu2.1.34076_001	uncharacterized protein loc102805096	180	20	3.96068e-39	0.637	1	F:GO:0003676	-	IPR005312 (PFAM); PTHR21166 (PANTHER); PTHR21166:SF1 (PANTHER)
Aqu2.1.34078_001	tpa_exp: replicase helicase endonuclease	111	18	5.02515e-08	0.723889	2	P:GO:0006259; P:GO:0044763	-	no IPS match
Aqu2.1.34080_001	predicted protein [Nematostella vectensis]	144	2	7.40426e-09	0.53	5	P:GO:0007218; C:GO:0016021; C:GO:0016020; C:GO:0005886; F:GO:0016787		no IPS match
Aqu2.1.34090_001	---NA---	130	0			0	-		no IPS match
Aqu2.1.34133_001	cullin-1	767	20	0	0.8105	3	F:GO:0031625; C:GO:0031461; P:GO:0006511	-	IPR016158 (SMART); IPR019559 (SMART); G3DSA:1.20.1310.10 (GENE3D); G3DSA:1.20.1310.10 (GENE3D); G3DSA:4.10.1030.10 (GENE3D); G3DSA:1.20.1310.10 (GENE3D); IPR011991 (G3DSA:1.10.10.GENE3D); G3DSA:1.20.1310.10 (GENE3D); IPR019559 (PFAM); IPR001373 (PFAM); IPR011991 (G3DSA:1.10.10.GENE3D); PTHR11932:SF40 (PANTHER); PTHR11932 (PANTHER); IPR016157 (PROSITE_PATTERNS); IPR016158 (PROSITE_PROFILES); IPR01…
Aqu2.1.34136_001	KDM5	1559	20	0	0.5955	6	P:GO:0055114; F:GO:0008270; F:GO:0016706; F:GO:0003677; C:GO:0005634; F:GO:0005515	EC:1.14.11.0	Coil (COILS); IPR003347 (SMART); IPR001965 (SMART); SM01014 (SMART); IPR001606 (SMART); IPR003349 (SMART); IPR004198 (PFAM); IPR003347 (PFAM); IPR001606 (PFAM); IPR019787 (PFAM); IPR013637 (PFAM); IPR013083 (G3DSA:3.30.40.GENE3D); IPR003349 (PFAM); IPR001606 (G3DSA:1.10.150.GENE3D); PTHR10694:SF8 (PANTHER); PTHR10694 (PANTHER); IPR019786 (PROSITE_PATTERNS); IPR003349 (PROSITE_PROFILES); IPR019787…
Aqu2.1.34137_001	dna repair protein complementing xp-c cells	582	20	0	0.607	3	F:GO:0003684; P:GO:0006289; C:GO:0005634	-	IPR018326 (SMART); IPR018328 (SMART); IPR018327 (SMART); IPR018327 (PFAM); IPR018326 (PFAM); IPR018325 (PFAM); IPR018328 (PFAM); IPR004583 (PANTHER); SSF54001 (SUPERFAMILY)
Aqu2.1.34144_001	uncharacterized protein c17orf59-like	204	20	1.46885e-46	0.5885	0	-		Coil (COILS); IPR019314 (PFAM); PTHR13440 (PANTHER); PTHR13440:SF5 (PANTHER)
Aqu2.1.34146_001	nuclease harbi1-like	124	20	1.48266e-49	0.595	0	-		IPR027806 (PFAM); IPR026103 (PANTHER)
Aqu2.1.34172_001	---NA---	70	0			0	-		SignalP-noTM (SIGNALP_EUK)
Aqu2.1.34173_001	---NA---	232	0			0	-		no IPS match
Aqu2.1.34188_001	calcium-binding mitochondrial carrier protein s -2 isoform x3	795	20	0	0.726	9	P:GO:0055085; F:GO:0005509; C:GO:0016021; P:GO:0006355; F:GO:0043565; F:GO:0003700; C:GO:0005634; C:GO:0005667; P:GO:0045449	-	IPR002067 (PRINTS); IPR001356 (SMART); IPR002048 (SMART); IPR011992 (G3DSA:1.10.238.GENE3D); IPR018108 (PFAM); IPR011992 (PFAM); IPR002048 (PFAM); IPR023395 (G3DSA:1.50.40.GENE3D); IPR001356 (PFAM); PF13833 (PFAM); IPR009057 (G3DSA:1.10.10.GENE3D); PTHR24089:SF57 (PANTHER); PTHR24089 (PANTHER); IPR018247 (PROSITE_PATTERNS); IPR017970 (PROSITE_PATTERNS); IPR002048 (PROSITE_PROFILES); IPR018108 (PR…
Aqu2.1.34189_001	coiled-coil domain-containing protein 180-like	1197	20	1.93332e-101	0.44	0	-		Coil (COILS); Coil (COILS); Coil (COILS); Coil (COILS); IPR027914 (PFAM); IPR028089 (PFAM); PTHR21444:SF11 (PANTHER); PTHR21444 (PANTHER); TRANSMEMBRANE (PHOBIUS); CYTOPLASMIC_DOMAIN (PHOBIUS); NON_CYTOPLASMIC_DOMAIN (PHOBIUS)
Aqu2.1.34194_001	embryonic stem cell-specific 5-hydroxymethylcytosine-binding protein	335	20	0	0.578	0	-		IPR003738 (G3DSA:3.90.1680.GENE3D); IPR003738 (PFAM); PTHR13604:SF0 (PANTHER); IPR003738 (PANTHER); IPR003738 (SUPERFAMILY)
Aqu2.1.34195_001	transmembrane and tpr repeat-containing protein 3	653	20	0	0.5695	4	P:GO:0048856; P:GO:0007275; P:GO:0044767; F:GO:0005515	-	IPR019734 (SMART); PF13414 (PFAM); IPR013105 (PFAM); IPR013618 (PFAM); IPR011990 (G3DSA:1.25.40.GENE3D); PTHR23083 (PANTHER); PTHR23083:SF1 (PANTHER); NON_CYTOPLASMIC_DOMAIN (PHOBIUS); TRANSMEMBRANE (PHOBIUS); TRANSMEMBRANE (PHOBIUS); TRANSMEMBRANE (PHOBIUS); NON_CYTOPLASMIC_DOMAIN (PHOBIUS); CYTOPLASMIC_DOMAIN (PHOBIUS); TRANSMEMBRANE (PHOBIUS); TRANSMEMBRANE (PHOBIUS); TRANSMEMBRANE (PHOBIUS); …
Aqu2.1.34219_001	transmembrane protein 115-like	1246	20	0	0.554	2	F:GO:0004252; C:GO:0016021		Coil (COILS); Coil (COILS); Coil (COILS); IPR013861 (PFAM); PTHR13377:SF3 (PANTHER); PTHR13377 (PANTHER); TRANSMEMBRANE (PHOBIUS); CYTOPLASMIC_DOMAIN (PHOBIUS); CYTOPLASMIC_DOMAIN (PHOBIUS); NON_CYTOPLASMIC_DOMAIN (PHOBIUS); NON_CYTOPLASMIC_DOMAIN (PHOBIUS); CYTOPLASMIC_DOMAIN (PHOBIUS); NON_CYTOPLASMIC_DOMAIN (PHOBIUS); TRANSMEMBRANE (PHOBIUS); TRANSMEMBRANE (PHOBIUS); TRANSMEMBRANE (PHOBIUS); N…
Aqu2.1.34252_001	wd repeat-containing protein 78	204	20	2.10269e-123	0.59	1	F:GO:0005515		IPR001680 (SMART); IPR015943 (G3DSA:2.130.10.GENE3D); IPR001680 (PFAM); PTHR12442 (PANTHER); PTHR12442:SF12 (PANTHER); IPR017986 (PROSITE_PROFILES); IPR001680 (PROSITE_PROFILES); IPR017986 (SUPERFAMILY)
Aqu2.1.34267_001	filamin-a-like isoform x4	1768	20	0	0.507	1	F:GO:0003779	-	IPR001715 (SMART); IPR001298 (SMART); IPR013783 (G3DSA:2.60.40.GENE3D); IPR017868 (PFAM); IPR001715 (G3DSA:1.10.418.GENE3D); IPR001715 (PFAM); PTHR11915 (PANTHER); PTHR11915:SF47 (PANTHER); IPR001589 (PROSITE_PATTERNS); IPR001589 (PROSITE_PATTERNS); IPR017868 (PROSITE_PROFILES); IPR001715 (PROSITE_PROFILES); IPR001715 (SUPERFAMILY); IPR014756 (SUPERFAMILY)
Aqu2.1.34272_001	origin recognition complex subunit 1	962	20	0	0.7255	7	F:GO:0017111; C:GO:0000808; P:GO:0006260; F:GO:0005524; C:GO:0005634; F:GO:0003677; F:GO:0003682	EC:3.6.1.15	IPR020478 (PRINTS); IPR017956 (SMART); IPR015163 (SMART); IPR001025 (SMART); IPR003593 (SMART); G3DSA:3.40.50.300 (GENE3D); IPR015163 (PFAM); IPR017956 (PFAM); IPR001025 (PFAM); IPR011991 (G3DSA:1.10.10.GENE3D); G3DSA:1.10.8.60 (GENE3D); IPR003959 (PFAM); PTHR10763 (PANTHER); IPR020793 (PTHR10763:PANTHER); IPR001025 (PROSITE_PROFILES); IPR027417 (SUPERFAMILY)
Aqu2.1.34274_001	microtubule-associated serine threonine-protein kinase 4 isoform x1	1368	20	0	0.623	6	P:GO:0006468; F:GO:0005524; F:GO:0000287; F:GO:0004674; P:GO:0009069; F:GO:0005515	EC:2.7.11.0	IPR002290 (SMART); IPR000961 (SMART); IPR001478 (SMART); G3DSA:3.30.200.20 (GENE3D); G3DSA:1.10.510.10 (GENE3D); IPR000719 (PFAM); IPR015022 (PFAM); G3DSA:2.30.42.10 (GENE3D); IPR023142 (G3DSA:1.20.1480.GENE3D); PTHR24356:SF39 (PANTHER); PTHR24356 (PANTHER); IPR008271 (PROSITE_PATTERNS); IPR000719 (PROSITE_PROFILES); IPR000961 (PROSITE_PROFILES); IPR023142 (SUPERFAMILY); IPR001478 (SUPERFAMILY); …
Aqu2.1.34277_001	PREDICTED: hypothetical protein LOC100638531 [Amphimedon queenslandica]	196	2	1.30291e-69	0.625	1	F:GO:0005515		SIGNAL_PEPTIDE_N_REGION (PHOBIUS); SIGNAL_PEPTIDE_C_REGION (PHOBIUS); SIGNAL_PEPTIDE (PHOBIUS); SIGNAL_PEPTIDE_H_REGION (PHOBIUS); NON_CYTOPLASMIC_DOMAIN (PHOBIUS); IPR003961 (PROSITE_PROFILES); SignalP-noTM (SIGNALP_EUK); SignalP-noTM (SIGNALP_GRAM_NEGATIVE); SignalP-TM (SIGNALP_GRAM_POSITIVE); IPR003961 (SUPERFAMILY)
Aqu2.1.34294_001	adhesin-like protein	1245	10	3.72439e-54	0.412	8	F:GO:0016301; F:GO:0005524; F:GO:0004672; P:GO:0016310; F:GO:0000166; P:GO:0006468; F:GO:0016772; F:GO:0004674		IPR006626 (SMART); TRANSMEMBRANE (PHOBIUS); TRANSMEMBRANE (PHOBIUS); NON_CYTOPLASMIC_DOMAIN (PHOBIUS); NON_CYTOPLASMIC_DOMAIN (PHOBIUS); TRANSMEMBRANE (PHOBIUS); TRANSMEMBRANE (PHOBIUS); NON_CYTOPLASMIC_DOMAIN (PHOBIUS); TRANSMEMBRANE (PHOBIUS); NON_CYTOPLASMIC_DOMAIN (PHOBIUS); TRANSMEMBRANE (PHOBIUS); CYTOPLASMIC_DOMAIN (PHOBIUS); CYTOPLASMIC_DOMAIN (PHOBIUS); CYTOPLASMIC_DOMAIN (PHOBIUS); TRAN…
Aqu2.1.34312_001	---NA---	34	0			0	-		no IPS match
Aqu2.1.34331_001	dual specificity protein kinase shkd-like	1041	20	8.4949e-76	0.5775	4	F:GO:0005515; P:GO:0006468; F:GO:0004672; F:GO:0005524	-	Coil (COILS); Coil (COILS); IPR015915 (G3DSA:2.120.10.GENE3D); IPR000719 (PFAM); G3DSA:1.10.510.10 (GENE3D); PTHR23244 (PANTHER); IPR000719 (PROSITE_PROFILES); IPR011009 (SUPERFAMILY); SSF117281 (SUPERFAMILY); IPR011043 (SUPERFAMILY); SSF117281 (SUPERFAMILY)
Aqu2.1.34332_001	serine threonine-protein kinase tao1-like isoform x3	974	20	0	0.7015	20	P:GO:0043507; C:GO:0030659; P:GO:0008360; F:GO:0031434; P:GO:0000186; P:GO:0031572; P:GO:0046329; C:GO:0016021; P:GO:0048041; C:GO:0005730; P:GO:0046777; P:GO:0030036; C:GO:0030425; C:GO:0005856; F:GO:0004709; P:GO:0046330; F:GO:0005524; C:GO:0005739; P:GO:0007178; P:GO:0009069	EC:2.7.11.25	Coil (COILS); Coil (COILS); Coil (COILS); IPR002290 (SMART); IPR000719 (PFAM); G3DSA:1.10.510.10 (GENE3D); G3DSA:3.30.200.20 (GENE3D); PTHR24361:SF33 (PANTHER); PTHR24361 (PANTHER); IPR017441 (PROSITE_PATTERNS); IPR000719 (PROSITE_PROFILES); IPR011009 (SUPERFAMILY)
Aqu2.1.34360_001	---NA---	21	0			0	-		no IPS match
Aqu2.1.34371_001	sarcoplasmic endoplasmic reticulum calcium atpase 2-like	222	20	1.23232e-155	0.8245	30	P:GO:0086036; C:GO:0012506; P:GO:0006984; P:GO:0008544; F:GO:0031775; P:GO:0006937; F:GO:0008022; P:GO:0007155; P:GO:0006874; P:GO:0045822; F:GO:0044548; P:GO:0070296; P:GO:0010460; C:GO:0031095; F:GO:0005509; F:GO:0086039; C:GO:0033017; P:GO:0043434; P:GO:0007596; C:GO:0043234; P:GO:0055119; C:GO:0048471; P:GO:0070588; P:GO:0002026; P:GO:0006200; C:GO:0031234; F:GO:0019899; C:GO:0005887; C:GO:00…	-	IPR006068 (PFAM); IPR023298 (G3DSA:1.20.1110.GENE3D); PTHR24093 (PANTHER); PTHR24093:SF64 (PANTHER); NON_CYTOPLASMIC_DOMAIN (PHOBIUS); TRANSMEMBRANE (PHOBIUS); NON_CYTOPLASMIC_DOMAIN (PHOBIUS); TRANSMEMBRANE (PHOBIUS); CYTOPLASMIC_DOMAIN (PHOBIUS); TRANSMEMBRANE (PHOBIUS); TRANSMEMBRANE (PHOBIUS); CYTOPLASMIC_DOMAIN (PHOBIUS); CYTOPLASMIC_DOMAIN (PHOBIUS); SSF81665 (SUPERFAMILY); TMhelix (TMHMM);…
Aqu2.1.34406_001	rna-binding protein fus isoform x1	450	20	4.29911e-161	0.557	3	F:GO:0003676; F:GO:0008270; F:GO:0000166		IPR000504 (SMART); IPR001876 (SMART); IPR012677 (G3DSA:3.30.70.GENE3D); IPR000504 (PFAM); IPR001876 (PFAM); IPR001876 (G3DSA:4.10.1060.GENE3D); PTHR23238 (PANTHER); IPR001876 (PROSITE_PATTERNS); IPR001876 (PROSITE_PROFILES); IPR000504 (PROSITE_PROFILES); SSF90209 (SUPERFAMILY); SSF54928 (SUPERFAMILY)
Aqu2.1.34408_001	calcium calmodulin-dependent protein kinase kinase 1-like isoform x2	295	20	0	0.6895	4	P:GO:0006468; F:GO:0005524; F:GO:0004674; P:GO:0009069	EC:2.7.11.0	IPR002290 (SMART); G3DSA:1.10.510.10 (GENE3D); IPR000719 (PFAM); PTHR24347:SF105 (PANTHER); IPR020636 (PANTHER); IPR008271 (PROSITE_PATTERNS); IPR000719 (PROSITE_PROFILES); IPR011009 (SUPERFAMILY)
Aqu2.1.34413_001	fact complex subunit ssrp1-like	269	20	0	0.7745	8	P:GO:0006259; F:GO:0003677; P:GO:0006351; P:GO:0006974; C:GO:0005737; F:GO:0003682; C:GO:0005634; C:GO:0000785	-	IPR000969 (PRINTS); IPR013719 (PFAM); IPR024954 (PFAM); PTHR13711 (PANTHER); PTHR13711:SF40 (PANTHER); SSF50729 (SUPERFAMILY)
[truncated: 732 more rows]
