# Supplementary material for: Landscape of histone modifications in a sponge reveals the origin of animal cis-regulatory complexity
Source: eLife. 2017 Apr 11;6:e22194. doi: 10.7554/eLife.22194 (PMC5429095; doi:10.7554/eLife.22194)
Supplement: Figure 6—source data 4. — DOI: http://dx.doi.org/10.7554/eLife.22194.032 [file elife-22194-fig6-data4.xlsx]

## Sheet: Figure 6-Source Data 4
Figure 6-source data 4. GO term enrichment outcome for the nearest neighbors genes of the adult predicted activated enhancer-like elements (Hypergeometric test, FDR <0.01).
Molecular function
GO-ID	p-value	corr p-value	x	n	X	N	Description	Genes in test set
1071	1.2914e-06	0.00026022	17	327	340	26539	nucleic acid binding transcription factor activity	AQU2.1.25924_001|AQU2.1.38442_001|AQU2.1.38443_001|AQU2.1.20237_001|AQU2.1.38744_001|AQU2.1.32869_001|AQU2.1.43775_001|AQU2.1.20356_001|AQU2.1.35745_001|AQU2.1.31574_001|AQU2.1.38324_001|AQU2.1.27942_001|AQU2.1.33729_001|AQU2.1.34450_001|AQU2.1.31351_001|AQU2.1.27353_001|AQU2.1.33727_001
3700	1.2914e-06	0.00026022	17	327	340	26539	transcription factor activity, sequence-specific DNA binding	AQU2.1.25924_001|AQU2.1.38442_001|AQU2.1.38443_001|AQU2.1.20237_001|AQU2.1.38744_001|AQU2.1.32869_001|AQU2.1.43775_001|AQU2.1.20356_001|AQU2.1.35745_001|AQU2.1.31574_001|AQU2.1.38324_001|AQU2.1.27942_001|AQU2.1.33729_001|AQU2.1.34450_001|AQU2.1.31351_001|AQU2.1.27353_001|AQU2.1.33727_001
Biological process
GO-ID	p-value	corr p-value	x	n	X	N	Description	Genes in test set
80090	1.2766e-09	2.0642e-06	52	1626	261	19944	regulation of primary metabolic process	AQU2.1.23392_001|AQU2.1.38442_001|AQU2.1.29862_001|AQU2.1.25862_001|AQU2.1.30507_001|AQU2.1.32603_001|AQU2.1.35140_001|AQU2.1.43607_001|AQU2.1.38443_001|AQU2.1.20237_001|AQU2.1.30046_001|AQU2.1.38744_001|AQU2.1.43775_001|AQU2.1.35745_001|AQU2.1.27279_001|AQU2.1.34613_001|AQU2.1.30487_001|AQU2.1.39753_001|AQU2.1.33727_001|AQU2.1.29479_001|AQU2.1.33763_001|AQU2.1.37427_001|AQU2.1.22480_001|AQU2.1.3…
60255	4.091e-09	3.3075e-06	52	1682	261	19944	regulation of macromolecule metabolic process	AQU2.1.23392_001|AQU2.1.38442_001|AQU2.1.29862_001|AQU2.1.25862_001|AQU2.1.30507_001|AQU2.1.32603_001|AQU2.1.35140_001|AQU2.1.43607_001|AQU2.1.38443_001|AQU2.1.20237_001|AQU2.1.30046_001|AQU2.1.38744_001|AQU2.1.43775_001|AQU2.1.35745_001|AQU2.1.27279_001|AQU2.1.34613_001|AQU2.1.30487_001|AQU2.1.39753_001|AQU2.1.33727_001|AQU2.1.29479_001|AQU2.1.33763_001|AQU2.1.37427_001|AQU2.1.22480_001|AQU2.1.3…
31323	6.9212e-09	3.7305e-06	51	1657	261	19944	regulation of cellular metabolic process	AQU2.1.23392_001|AQU2.1.38442_001|AQU2.1.29862_001|AQU2.1.25862_001|AQU2.1.30507_001|AQU2.1.32603_001|AQU2.1.35140_001|AQU2.1.38443_001|AQU2.1.20237_001|AQU2.1.30046_001|AQU2.1.38744_001|AQU2.1.43775_001|AQU2.1.35745_001|AQU2.1.27279_001|AQU2.1.34613_001|AQU2.1.30487_001|AQU2.1.39753_001|AQU2.1.33727_001|AQU2.1.29479_001|AQU2.1.33763_001|AQU2.1.37427_001|AQU2.1.22480_001|AQU2.1.31574_001|AQU2.1.3…
19219	1.879e-08	7.596e-06	41	1208	261	19944	regulation of nucleobase-containing compound metabolic process	AQU2.1.23392_001|AQU2.1.38442_001|AQU2.1.29862_001|AQU2.1.25862_001|AQU2.1.30507_001|AQU2.1.32603_001|AQU2.1.41213_001|AQU2.1.38443_001|AQU2.1.38691_001|AQU2.1.20237_001|AQU2.1.38744_001|AQU2.1.24487_001|AQU2.1.43775_001|AQU2.1.20356_001|AQU2.1.35745_001|AQU2.1.27279_001|AQU2.1.37774_001|AQU2.1.34613_001|AQU2.1.38324_001|AQU2.1.18821_001|AQU2.1.31351_001|AQU2.1.30487_001|AQU2.1.39753_001|AQU2.1.3…
48523	2.3946e-08	7.7441e-06	34	894	261	19944	negative regulation of cellular process	AQU2.1.25862_001|AQU2.1.30507_001|AQU2.1.32501_001|AQU2.1.32603_001|AQU2.1.41927_001|AQU2.1.38140_001|AQU2.1.35140_001|AQU2.1.30046_001|AQU2.1.38744_001|AQU2.1.24487_001|AQU2.1.43775_001|AQU2.1.37774_001|AQU2.1.18821_001|AQU2.1.30487_001|AQU2.1.29479_001|AQU2.1.33763_001|AQU2.1.32127_001|AQU2.1.35122_001|AQU2.1.38788_001|AQU2.1.37427_001|AQU2.1.43271_001|AQU2.1.21080_001|AQU2.1.35559_001|AQU2.1.2…
2000112	3.5508e-08	9.5695e-06	41	1236	261	19944	regulation of cellular macromolecule biosynthetic process	AQU2.1.23392_001|AQU2.1.38442_001|AQU2.1.29862_001|AQU2.1.25862_001|AQU2.1.30507_001|AQU2.1.32603_001|AQU2.1.41213_001|AQU2.1.38443_001|AQU2.1.20237_001|AQU2.1.38744_001|AQU2.1.24487_001|AQU2.1.43775_001|AQU2.1.20356_001|AQU2.1.35745_001|AQU2.1.27279_001|AQU2.1.37774_001|AQU2.1.34613_001|AQU2.1.38324_001|AQU2.1.18821_001|AQU2.1.31351_001|AQU2.1.30487_001|AQU2.1.39753_001|AQU2.1.33727_001|AQU2.1.2…
10556	4.8406e-08	1.0554e-05	41	1250	261	19944	regulation of macromolecule biosynthetic process	AQU2.1.23392_001|AQU2.1.38442_001|AQU2.1.29862_001|AQU2.1.25862_001|AQU2.1.30507_001|AQU2.1.32603_001|AQU2.1.41213_001|AQU2.1.38443_001|AQU2.1.20237_001|AQU2.1.38744_001|AQU2.1.24487_001|AQU2.1.43775_001|AQU2.1.20356_001|AQU2.1.35745_001|AQU2.1.27279_001|AQU2.1.37774_001|AQU2.1.34613_001|AQU2.1.38324_001|AQU2.1.18821_001|AQU2.1.31351_001|AQU2.1.30487_001|AQU2.1.39753_001|AQU2.1.33727_001|AQU2.1.2…
31326	7.0012e-08	1.0554e-05	41	1267	261	19944	regulation of cellular biosynthetic process	AQU2.1.23392_001|AQU2.1.38442_001|AQU2.1.29862_001|AQU2.1.25862_001|AQU2.1.30507_001|AQU2.1.32603_001|AQU2.1.41213_001|AQU2.1.38443_001|AQU2.1.20237_001|AQU2.1.38744_001|AQU2.1.24487_001|AQU2.1.43775_001|AQU2.1.20356_001|AQU2.1.35745_001|AQU2.1.27279_001|AQU2.1.37774_001|AQU2.1.34613_001|AQU2.1.38324_001|AQU2.1.18821_001|AQU2.1.31351_001|AQU2.1.30487_001|AQU2.1.39753_001|AQU2.1.33727_001|AQU2.1.2…
48519	7.9999e-08	1.0554e-05	35	986	261	19944	negative regulation of biological process	AQU2.1.25862_001|AQU2.1.30507_001|AQU2.1.32501_001|AQU2.1.32603_001|AQU2.1.41927_001|AQU2.1.38140_001|AQU2.1.35140_001|AQU2.1.30046_001|AQU2.1.38744_001|AQU2.1.24487_001|AQU2.1.43775_001|AQU2.1.37774_001|AQU2.1.18821_001|AQU2.1.27474_001|AQU2.1.30487_001|AQU2.1.29479_001|AQU2.1.33763_001|AQU2.1.32127_001|AQU2.1.35122_001|AQU2.1.38788_001|AQU2.1.37427_001|AQU2.1.43271_001|AQU2.1.21080_001|AQU2.1.3…
6355	8.0728e-08	1.0554e-05	36	1033	261	19944	regulation of transcription, DNA-templated	AQU2.1.23392_001|AQU2.1.38442_001|AQU2.1.29862_001|AQU2.1.25862_001|AQU2.1.30507_001|AQU2.1.41213_001|AQU2.1.38443_001|AQU2.1.20237_001|AQU2.1.38744_001|AQU2.1.24487_001|AQU2.1.43775_001|AQU2.1.20356_001|AQU2.1.35745_001|AQU2.1.27279_001|AQU2.1.37774_001|AQU2.1.34613_001|AQU2.1.38324_001|AQU2.1.18821_001|AQU2.1.31351_001|AQU2.1.30487_001|AQU2.1.33727_001|AQU2.1.33763_001|AQU2.1.25924_001|AQU2.1.3…
1903506	8.0728e-08	1.0554e-05	36	1033	261	19944	regulation of nucleic acid-templated transcription	AQU2.1.23392_001|AQU2.1.38442_001|AQU2.1.29862_001|AQU2.1.25862_001|AQU2.1.30507_001|AQU2.1.41213_001|AQU2.1.38443_001|AQU2.1.20237_001|AQU2.1.38744_001|AQU2.1.24487_001|AQU2.1.43775_001|AQU2.1.20356_001|AQU2.1.35745_001|AQU2.1.27279_001|AQU2.1.37774_001|AQU2.1.34613_001|AQU2.1.38324_001|AQU2.1.18821_001|AQU2.1.31351_001|AQU2.1.30487_001|AQU2.1.33727_001|AQU2.1.33763_001|AQU2.1.25924_001|AQU2.1.3…
31324	8.1965e-08	1.0554e-05	22	438	261	19944	negative regulation of cellular metabolic process	AQU2.1.33763_001|AQU2.1.25862_001|AQU2.1.30507_001|AQU2.1.35122_001|AQU2.1.38788_001|AQU2.1.37427_001|AQU2.1.32603_001|AQU2.1.35140_001|AQU2.1.23869_001|AQU2.1.30046_001|AQU2.1.38744_001|AQU2.1.24487_001|AQU2.1.32869_001|AQU2.1.43775_001|AQU2.1.37774_001|AQU2.1.31786_001|AQU2.1.18821_001|AQU2.1.27176_001|AQU2.1.35208_001|AQU2.1.27353_001|AQU2.1.30487_001|AQU2.1.40861_001
9889	8.485e-08	1.0554e-05	41	1276	261	19944	regulation of biosynthetic process	AQU2.1.23392_001|AQU2.1.38442_001|AQU2.1.29862_001|AQU2.1.25862_001|AQU2.1.30507_001|AQU2.1.32603_001|AQU2.1.41213_001|AQU2.1.38443_001|AQU2.1.20237_001|AQU2.1.38744_001|AQU2.1.24487_001|AQU2.1.43775_001|AQU2.1.20356_001|AQU2.1.35745_001|AQU2.1.27279_001|AQU2.1.37774_001|AQU2.1.34613_001|AQU2.1.38324_001|AQU2.1.18821_001|AQU2.1.31351_001|AQU2.1.30487_001|AQU2.1.39753_001|AQU2.1.33727_001|AQU2.1.2…
2001141	1.0242e-07	1.1781e-05	36	1043	261	19944	regulation of RNA biosynthetic process	AQU2.1.23392_001|AQU2.1.38442_001|AQU2.1.29862_001|AQU2.1.25862_001|AQU2.1.30507_001|AQU2.1.41213_001|AQU2.1.38443_001|AQU2.1.20237_001|AQU2.1.38744_001|AQU2.1.24487_001|AQU2.1.43775_001|AQU2.1.20356_001|AQU2.1.35745_001|AQU2.1.27279_001|AQU2.1.37774_001|AQU2.1.34613_001|AQU2.1.38324_001|AQU2.1.18821_001|AQU2.1.31351_001|AQU2.1.30487_001|AQU2.1.33727_001|AQU2.1.33763_001|AQU2.1.25924_001|AQU2.1.3…
51252	1.1644e-07	1.1781e-05	37	1096	261	19944	regulation of RNA metabolic process	AQU2.1.23392_001|AQU2.1.38442_001|AQU2.1.29862_001|AQU2.1.25862_001|AQU2.1.30507_001|AQU2.1.32603_001|AQU2.1.41213_001|AQU2.1.38443_001|AQU2.1.20237_001|AQU2.1.38744_001|AQU2.1.24487_001|AQU2.1.43775_001|AQU2.1.20356_001|AQU2.1.35745_001|AQU2.1.27279_001|AQU2.1.37774_001|AQU2.1.34613_001|AQU2.1.38324_001|AQU2.1.18821_001|AQU2.1.31351_001|AQU2.1.30487_001|AQU2.1.33727_001|AQU2.1.33763_001|AQU2.1.2…
51171	1.1658e-07	1.1781e-05	42	1341	261	19944	regulation of nitrogen compound metabolic process	AQU2.1.23392_001|AQU2.1.38442_001|AQU2.1.29862_001|AQU2.1.25862_001|AQU2.1.30507_001|AQU2.1.32603_001|AQU2.1.41213_001|AQU2.1.38443_001|AQU2.1.38691_001|AQU2.1.20237_001|AQU2.1.38744_001|AQU2.1.24487_001|AQU2.1.43775_001|AQU2.1.20356_001|AQU2.1.35745_001|AQU2.1.27279_001|AQU2.1.37774_001|AQU2.1.34613_001|AQU2.1.38324_001|AQU2.1.18821_001|AQU2.1.31351_001|AQU2.1.30487_001|AQU2.1.39753_001|AQU2.1.3…
19222	1.5516e-07	1.4249e-05	55	2043	261	19944	regulation of metabolic process	AQU2.1.23392_001|AQU2.1.38442_001|AQU2.1.29862_001|AQU2.1.25862_001|AQU2.1.30507_001|AQU2.1.32603_001|AQU2.1.35140_001|AQU2.1.43607_001|AQU2.1.38443_001|AQU2.1.20237_001|AQU2.1.30046_001|AQU2.1.38744_001|AQU2.1.43775_001|AQU2.1.35745_001|AQU2.1.27279_001|AQU2.1.34613_001|AQU2.1.30487_001|AQU2.1.39753_001|AQU2.1.33727_001|AQU2.1.29479_001|AQU2.1.33763_001|AQU2.1.37427_001|AQU2.1.22480_001|AQU2.1.3…
10605	1.5861e-07	1.4249e-05	22	455	261	19944	negative regulation of macromolecule metabolic process	AQU2.1.33763_001|AQU2.1.25862_001|AQU2.1.30507_001|AQU2.1.35122_001|AQU2.1.38788_001|AQU2.1.37427_001|AQU2.1.32603_001|AQU2.1.35140_001|AQU2.1.23869_001|AQU2.1.30046_001|AQU2.1.38744_001|AQU2.1.24487_001|AQU2.1.32869_001|AQU2.1.43775_001|AQU2.1.37774_001|AQU2.1.31786_001|AQU2.1.18821_001|AQU2.1.27176_001|AQU2.1.35208_001|AQU2.1.27353_001|AQU2.1.30487_001|AQU2.1.40861_001
9892	6.4089e-07	5.4543e-05	22	494	261	19944	negative regulation of metabolic process	AQU2.1.33763_001|AQU2.1.25862_001|AQU2.1.30507_001|AQU2.1.35122_001|AQU2.1.38788_001|AQU2.1.37427_001|AQU2.1.32603_001|AQU2.1.35140_001|AQU2.1.23869_001|AQU2.1.30046_001|AQU2.1.38744_001|AQU2.1.24487_001|AQU2.1.32869_001|AQU2.1.43775_001|AQU2.1.37774_001|AQU2.1.31786_001|AQU2.1.18821_001|AQU2.1.27176_001|AQU2.1.35208_001|AQU2.1.27353_001|AQU2.1.30487_001|AQU2.1.40861_001
10468	8.0691e-07	6.5239e-05	39	1287	261	19944	regulation of gene expression	AQU2.1.23392_001|AQU2.1.38442_001|AQU2.1.29862_001|AQU2.1.25862_001|AQU2.1.30507_001|AQU2.1.32603_001|AQU2.1.41213_001|AQU2.1.38443_001|AQU2.1.38691_001|AQU2.1.20237_001|AQU2.1.38744_001|AQU2.1.24487_001|AQU2.1.43775_001|AQU2.1.20356_001|AQU2.1.35745_001|AQU2.1.27279_001|AQU2.1.37774_001|AQU2.1.34613_001|AQU2.1.38324_001|AQU2.1.18821_001|AQU2.1.31351_001|AQU2.1.30487_001|AQU2.1.33727_001|AQU2.1.3…
44707	5.0282e-06	0.00038717	42	1549	261	19944	single-multicellular organism process	AQU2.1.33596_001|AQU2.1.23392_001|AQU2.1.25862_001|AQU2.1.30507_001|AQU2.1.34845_001|AQU2.1.32274_001|AQU2.1.38404_001|AQU2.1.38140_001|AQU2.1.31014_001|AQU2.1.43810_001|AQU2.1.30046_001|AQU2.1.43460_001|AQU2.1.38744_001|AQU2.1.34206_001|AQU2.1.37880_001|AQU2.1.35745_001|AQU2.1.27279_001|AQU2.1.29223_001|AQU2.1.30487_001|AQU2.1.34303_001|AQU2.1.41333_001|AQU2.1.39753_001|AQU2.1.33727_001|AQU2.1.2…
32502	5.8025e-06	0.00042649	42	1558	261	19944	developmental process	AQU2.1.33596_001|AQU2.1.23392_001|AQU2.1.25862_001|AQU2.1.30507_001|AQU2.1.34845_001|AQU2.1.38404_001|AQU2.1.38140_001|AQU2.1.31014_001|AQU2.1.43810_001|AQU2.1.30046_001|AQU2.1.43460_001|AQU2.1.38744_001|AQU2.1.34206_001|AQU2.1.38168_001|AQU2.1.37880_001|AQU2.1.35745_001|AQU2.1.27279_001|AQU2.1.29223_001|AQU2.1.30487_001|AQU2.1.12864_001|AQU2.1.41333_001|AQU2.1.39753_001|AQU2.1.33727_001|AQU2.1.2…
32501	9.101e-06	0.00063984	43	1642	261	19944	multicellular organismal process	AQU2.1.33596_001|AQU2.1.23392_001|AQU2.1.25862_001|AQU2.1.30507_001|AQU2.1.34845_001|AQU2.1.32274_001|AQU2.1.38404_001|AQU2.1.38140_001|AQU2.1.31014_001|AQU2.1.43810_001|AQU2.1.30046_001|AQU2.1.43460_001|AQU2.1.38744_001|AQU2.1.34206_001|AQU2.1.37880_001|AQU2.1.35745_001|AQU2.1.27279_001|AQU2.1.29223_001|AQU2.1.30487_001|AQU2.1.34303_001|AQU2.1.41333_001|AQU2.1.39753_001|AQU2.1.33727_001|AQU2.1.2…
51253	1.3863e-05	0.000934	14	270	261	19944	negative regulation of RNA metabolic process	AQU2.1.25862_001|AQU2.1.30507_001|AQU2.1.35122_001|AQU2.1.32603_001|AQU2.1.23869_001|AQU2.1.38744_001|AQU2.1.24487_001|AQU2.1.32869_001|AQU2.1.43775_001|AQU2.1.37774_001|AQU2.1.18821_001|AQU2.1.35208_001|AQU2.1.27353_001|AQU2.1.30487_001
44767	1.5985e-05	0.0010339	40	1514	261	19944	single-organism developmental process	AQU2.1.33596_001|AQU2.1.23392_001|AQU2.1.25862_001|AQU2.1.30507_001|AQU2.1.34845_001|AQU2.1.38404_001|AQU2.1.38140_001|AQU2.1.31014_001|AQU2.1.43810_001|AQU2.1.30046_001|AQU2.1.43460_001|AQU2.1.38744_001|AQU2.1.34206_001|AQU2.1.38168_001|AQU2.1.37880_001|AQU2.1.35745_001|AQU2.1.27279_001|AQU2.1.29223_001|AQU2.1.30487_001|AQU2.1.41333_001|AQU2.1.39753_001|AQU2.1.33727_001|AQU2.1.25601_001|AQU2.1.2…
7275	2.0526e-05	0.0012766	36	1313	261	19944	multicellular organismal development	AQU2.1.33596_001|AQU2.1.23392_001|AQU2.1.25862_001|AQU2.1.30507_001|AQU2.1.34845_001|AQU2.1.38404_001|AQU2.1.38140_001|AQU2.1.31014_001|AQU2.1.43810_001|AQU2.1.30046_001|AQU2.1.43460_001|AQU2.1.38744_001|AQU2.1.34206_001|AQU2.1.37880_001|AQU2.1.35745_001|AQU2.1.27279_001|AQU2.1.29223_001|AQU2.1.30487_001|AQU2.1.41333_001|AQU2.1.33727_001|AQU2.1.25601_001|AQU2.1.29479_001|AQU2.1.41119_001|AQU2.1.3…
45934	3.4285e-05	0.0020533	14	293	261	19944	negative regulation of nucleobase-containing compound metabolic process	AQU2.1.25862_001|AQU2.1.30507_001|AQU2.1.35122_001|AQU2.1.32603_001|AQU2.1.23869_001|AQU2.1.38744_001|AQU2.1.24487_001|AQU2.1.32869_001|AQU2.1.43775_001|AQU2.1.37774_001|AQU2.1.18821_001|AQU2.1.35208_001|AQU2.1.27353_001|AQU2.1.30487_001
45892	4.2696e-05	0.0023079	13	261	261	19944	negative regulation of transcription, DNA-templated	AQU2.1.25862_001|AQU2.1.30507_001|AQU2.1.35122_001|AQU2.1.23869_001|AQU2.1.38744_001|AQU2.1.24487_001|AQU2.1.32869_001|AQU2.1.43775_001|AQU2.1.37774_001|AQU2.1.18821_001|AQU2.1.35208_001|AQU2.1.27353_001|AQU2.1.30487_001
1903507	4.2696e-05	0.0023079	13	261	261	19944	negative regulation of nucleic acid-templated transcription	AQU2.1.25862_001|AQU2.1.30507_001|AQU2.1.35122_001|AQU2.1.23869_001|AQU2.1.38744_001|AQU2.1.24487_001|AQU2.1.32869_001|AQU2.1.43775_001|AQU2.1.37774_001|AQU2.1.18821_001|AQU2.1.35208_001|AQU2.1.27353_001|AQU2.1.30487_001
50789	4.2818e-05	0.0023079	113	6302	261	19944	regulation of biological process	AQU2.1.38442_001|AQU2.1.19192_001|AQU2.1.30507_001|AQU2.1.31177_001|AQU2.1.25863_001|AQU2.1.43455_001|AQU2.1.41927_001|AQU2.1.38140_001|AQU2.1.35140_001|AQU2.1.30728_001|AQU2.1.43607_001|AQU2.1.20237_001|AQU2.1.38744_001|AQU2.1.43775_001|AQU2.1.27474_001|AQU2.1.30487_001|AQU2.1.33939_001|AQU2.1.29479_001|AQU2.1.41119_001|AQU2.1.36708_001|AQU2.1.22480_001|AQU2.1.44051_001|AQU2.1.31574_001|AQU2.1.3…
1902679	4.4409e-05	0.0023164	13	262	261	19944	negative regulation of RNA biosynthetic process	AQU2.1.25862_001|AQU2.1.30507_001|AQU2.1.35122_001|AQU2.1.23869_001|AQU2.1.38744_001|AQU2.1.24487_001|AQU2.1.32869_001|AQU2.1.43775_001|AQU2.1.37774_001|AQU2.1.18821_001|AQU2.1.35208_001|AQU2.1.27353_001|AQU2.1.30487_001
50794	5.0123e-05	0.0025328	108	5970	261	19944	regulation of cellular process	AQU2.1.38442_001|AQU2.1.19192_001|AQU2.1.30507_001|AQU2.1.31177_001|AQU2.1.25863_001|AQU2.1.43455_001|AQU2.1.41927_001|AQU2.1.38140_001|AQU2.1.35140_001|AQU2.1.30728_001|AQU2.1.20237_001|AQU2.1.38744_001|AQU2.1.43775_001|AQU2.1.30487_001|AQU2.1.33939_001|AQU2.1.29479_001|AQU2.1.41119_001|AQU2.1.36708_001|AQU2.1.22480_001|AQU2.1.44051_001|AQU2.1.31574_001|AQU2.1.37481_001|AQU2.1.37163_001|AQU2.1.3…
51172	7.2398e-05	0.0035475	14	314	261	19944	negative regulation of nitrogen compound metabolic process	AQU2.1.25862_001|AQU2.1.30507_001|AQU2.1.35122_001|AQU2.1.32603_001|AQU2.1.23869_001|AQU2.1.38744_001|AQU2.1.24487_001|AQU2.1.32869_001|AQU2.1.43775_001|AQU2.1.37774_001|AQU2.1.18821_001|AQU2.1.35208_001|AQU2.1.27353_001|AQU2.1.30487_001
19438	8.2017e-05	0.0039006	26	871	261	19944	aromatic compound biosynthetic process	AQU2.1.39624_001|AQU2.1.42176_001|AQU2.1.31625_001|AQU2.1.16430_001|AQU2.1.22391_001|AQU2.1.42637_001|AQU2.1.38691_001|AQU2.1.31482_001|AQU2.1.37774_001|AQU2.1.29223_001|AQU2.1.31351_001|AQU2.1.13094_001|AQU2.1.29372_001|AQU2.1.33763_001|AQU2.1.29910_001|AQU2.1.27372_001|AQU2.1.36708_001|AQU2.1.25436_001|AQU2.1.17694_001|AQU2.1.29967_001|AQU2.1.27637_001|AQU2.1.31786_001|AQU2.1.21264_001|AQU2.1.3…
35556	8.8633e-05	0.0040949	22	677	261	19944	intracellular signal transduction	AQU2.1.29479_001|AQU2.1.25572_001|AQU2.1.19192_001|AQU2.1.38178_001|AQU2.1.36708_001|AQU2.1.37427_001|AQU2.1.31153_001|AQU2.1.44012_001|AQU2.1.41812_001|AQU2.1.23869_001|AQU2.1.39348_001|AQU2.1.44051_001|AQU2.1.37879_001|AQU2.1.31786_001|AQU2.1.29861_001|AQU2.1.36145_001|AQU2.1.44097_001|AQU2.1.32251_001|AQU2.1.37967_001|AQU2.1.40861_001|AQU2.1.33939_001|AQU2.1.39753_001
10629	9.1506e-05	0.0041101	14	321	261	19944	negative regulation of gene expression	AQU2.1.25862_001|AQU2.1.30507_001|AQU2.1.35122_001|AQU2.1.32603_001|AQU2.1.23869_001|AQU2.1.38744_001|AQU2.1.24487_001|AQU2.1.32869_001|AQU2.1.43775_001|AQU2.1.37774_001|AQU2.1.18821_001|AQU2.1.35208_001|AQU2.1.27353_001|AQU2.1.30487_001
48856	9.5706e-05	0.0041826	35	1359	261	19944	anatomical structure development	AQU2.1.33596_001|AQU2.1.23392_001|AQU2.1.25862_001|AQU2.1.30507_001|AQU2.1.34845_001|AQU2.1.38404_001|AQU2.1.38140_001|AQU2.1.31014_001|AQU2.1.43810_001|AQU2.1.30046_001|AQU2.1.43460_001|AQU2.1.38744_001|AQU2.1.34206_001|AQU2.1.38168_001|AQU2.1.35745_001|AQU2.1.27279_001|AQU2.1.29223_001|AQU2.1.30487_001|AQU2.1.41333_001|AQU2.1.33727_001|AQU2.1.25601_001|AQU2.1.29479_001|AQU2.1.43271_001|AQU2.1.2…
18130	0.0001437	0.0058301	26	902	261	19944	heterocycle biosynthetic process	AQU2.1.39624_001|AQU2.1.42176_001|AQU2.1.31625_001|AQU2.1.16430_001|AQU2.1.22391_001|AQU2.1.42637_001|AQU2.1.38691_001|AQU2.1.31482_001|AQU2.1.37774_001|AQU2.1.29223_001|AQU2.1.31351_001|AQU2.1.13094_001|AQU2.1.29372_001|AQU2.1.33763_001|AQU2.1.29910_001|AQU2.1.27372_001|AQU2.1.36708_001|AQU2.1.25436_001|AQU2.1.17694_001|AQU2.1.29967_001|AQU2.1.27637_001|AQU2.1.31786_001|AQU2.1.21264_001|AQU2.1.3…
1901362	0.00014625	0.0058301	27	955	261	19944	organic cyclic compound biosynthetic process	AQU2.1.39624_001|AQU2.1.42176_001|AQU2.1.31625_001|AQU2.1.16430_001|AQU2.1.22391_001|AQU2.1.42637_001|AQU2.1.38691_001|AQU2.1.31482_001|AQU2.1.37774_001|AQU2.1.29223_001|AQU2.1.31351_001|AQU2.1.13094_001|AQU2.1.31939_001|AQU2.1.29372_001|AQU2.1.33763_001|AQU2.1.29910_001|AQU2.1.27372_001|AQU2.1.36708_001|AQU2.1.25436_001|AQU2.1.17694_001|AQU2.1.29967_001|AQU2.1.27637_001|AQU2.1.31786_001|AQU2.1.2…
2000113	0.00014684	0.0058301	13	295	261	19944	negative regulation of cellular macromolecule biosynthetic process	AQU2.1.25862_001|AQU2.1.30507_001|AQU2.1.35122_001|AQU2.1.23869_001|AQU2.1.38744_001|AQU2.1.24487_001|AQU2.1.32869_001|AQU2.1.43775_001|AQU2.1.37774_001|AQU2.1.18821_001|AQU2.1.35208_001|AQU2.1.27353_001|AQU2.1.30487_001
48545	0.00014782	0.0058301	5	39	261	19944	response to steroid hormone	AQU2.1.25601_001|AQU2.1.38443_001|AQU2.1.38442_001|AQU2.1.29862_001|AQU2.1.29861_001
10558	0.00015695	0.0060426	13	297	261	19944	negative regulation of macromolecule biosynthetic process	AQU2.1.25862_001|AQU2.1.30507_001|AQU2.1.35122_001|AQU2.1.23869_001|AQU2.1.38744_001|AQU2.1.24487_001|AQU2.1.32869_001|AQU2.1.43775_001|AQU2.1.37774_001|AQU2.1.18821_001|AQU2.1.35208_001|AQU2.1.27353_001|AQU2.1.30487_001
43401	0.00017061	0.0064158	2	2	261	19944	steroid hormone mediated signaling pathway	AQU2.1.38443_001|AQU2.1.38442_001
31327	0.00019722	0.0072479	13	304	261	19944	negative regulation of cellular biosynthetic process	AQU2.1.25862_001|AQU2.1.30507_001|AQU2.1.35122_001|AQU2.1.23869_001|AQU2.1.38744_001|AQU2.1.24487_001|AQU2.1.32869_001|AQU2.1.43775_001|AQU2.1.37774_001|AQU2.1.18821_001|AQU2.1.35208_001|AQU2.1.27353_001|AQU2.1.30487_001
9890	0.00020364	0.0073176	13	305	261	19944	negative regulation of biosynthetic process	AQU2.1.25862_001|AQU2.1.30507_001|AQU2.1.35122_001|AQU2.1.23869_001|AQU2.1.38744_001|AQU2.1.24487_001|AQU2.1.32869_001|AQU2.1.43775_001|AQU2.1.37774_001|AQU2.1.18821_001|AQU2.1.35208_001|AQU2.1.27353_001|AQU2.1.30487_001
34654	0.00021957	0.0077182	23	772	261	19944	nucleobase-containing compound biosynthetic process	AQU2.1.42176_001|AQU2.1.29372_001|AQU2.1.33763_001|AQU2.1.29910_001|AQU2.1.31625_001|AQU2.1.36708_001|AQU2.1.25436_001|AQU2.1.16430_001|AQU2.1.22391_001|AQU2.1.42637_001|AQU2.1.38691_001|AQU2.1.31482_001|AQU2.1.29967_001|AQU2.1.37774_001|AQU2.1.27637_001|AQU2.1.31786_001|AQU2.1.21264_001|AQU2.1.31154_001|AQU2.1.29223_001|AQU2.1.35208_001|AQU2.1.31351_001|AQU2.1.29892_001|AQU2.1.13094_001
GO Slim
GO-ID	p-value	corr p-value	x	n	X	N	Description	Genes in test set
1071	1.1268e-06	0.00013859	17	327	372	29379	nucleic acid binding transcription factor activity	AQU2.1.25924_001|AQU2.1.38442_001|AQU2.1.38443_001|AQU2.1.20237_001|AQU2.1.38744_001|AQU2.1.32869_001|AQU2.1.43775_001|AQU2.1.20356_001|AQU2.1.35745_001|AQU2.1.31574_001|AQU2.1.38324_001|AQU2.1.27942_001|AQU2.1.33729_001|AQU2.1.34450_001|AQU2.1.31351_001|AQU2.1.27353_001|AQU2.1.33727_001
5575	2.1039e-05	0.0012939	183	11359	372	29379	cellular_component	AQU2.1.38442_001|AQU2.1.30507_001|AQU2.1.39629_001|AQU2.1.33027_001|AQU2.1.21553_001|AQU2.1.41927_001|AQU2.1.38140_001|AQU2.1.35140_001|AQU2.1.44137_001|AQU2.1.43607_001|AQU2.1.20237_001|AQU2.1.38744_001|AQU2.1.36604_001|AQU2.1.43775_001|AQU2.1.28098_001|AQU2.1.27474_001|AQU2.1.38134_001|AQU2.1.30487_001|AQU2.1.31939_001|AQU2.1.41333_001|AQU2.1.25601_001|AQU2.1.29479_001|AQU2.1.41119_001|AQU2.1.3…
48856	6.1508e-05	0.0025218	35	1359	372	29379	anatomical structure development	AQU2.1.33596_001|AQU2.1.23392_001|AQU2.1.25862_001|AQU2.1.30507_001|AQU2.1.34845_001|AQU2.1.38404_001|AQU2.1.38140_001|AQU2.1.31014_001|AQU2.1.43810_001|AQU2.1.30046_001|AQU2.1.43460_001|AQU2.1.38744_001|AQU2.1.34206_001|AQU2.1.38168_001|AQU2.1.35745_001|AQU2.1.27279_001|AQU2.1.29223_001|AQU2.1.30487_001|AQU2.1.41333_001|AQU2.1.33727_001|AQU2.1.25601_001|AQU2.1.29479_001|AQU2.1.43271_001|AQU2.1.2…
5634	0.00011076	0.0034058	53	2471	372	29379	nucleus	AQU2.1.39751_001|AQU2.1.23392_001|AQU2.1.38442_001|AQU2.1.29862_001|AQU2.1.25862_001|AQU2.1.30507_001|AQU2.1.32603_001|AQU2.1.33027_001|AQU2.1.38140_001|AQU2.1.32875_001|AQU2.1.38443_001|AQU2.1.20237_001|AQU2.1.30046_001|AQU2.1.38744_001|AQU2.1.38168_001|AQU2.1.43775_001|AQU2.1.35745_001|AQU2.1.19140_001|AQU2.1.38134_001|AQU2.1.29479_001|AQU2.1.33763_001|AQU2.1.21080_001|AQU2.1.22480_001|AQU2.1.2…
5623	0.00038743	0.0095308	134	8208	372	29379	cell	AQU2.1.38442_001|AQU2.1.30507_001|AQU2.1.39629_001|AQU2.1.33027_001|AQU2.1.21553_001|AQU2.1.41927_001|AQU2.1.38140_001|AQU2.1.35140_001|AQU2.1.43607_001|AQU2.1.20237_001|AQU2.1.38744_001|AQU2.1.36604_001|AQU2.1.43775_001|AQU2.1.28098_001|AQU2.1.27474_001|AQU2.1.38134_001|AQU2.1.30487_001|AQU2.1.41333_001|AQU2.1.25601_001|AQU2.1.29479_001|AQU2.1.22480_001|AQU2.1.31574_001|AQU2.1.37919_001|AQU2.1.3…
