# Supplementary material for: Landscape of histone modifications in a sponge reveals the origin of animal cis-regulatory complexity
Source: eLife. 2017 Apr 11;6:e22194. doi: 10.7554/eLife.22194 (PMC5429095; doi:10.7554/eLife.22194)
Supplement: Figure 6—source data 5. — DOI: http://dx.doi.org/10.7554/eLife.22194.033 [file elife-22194-fig6-data5.xlsx]

## Sheet: Figure 6-Source Data 5
Figure 6-source data 5. GO term enrichment outcome for the nearest neighbors genes of the larva predicted activated enhancer-like elements (Hypergeometric test, FDR <0.01).
Molecular function
GO-ID	p-value	corr p-value	x	n	X	N	Description	Genes in test set
5515	2.8705e-16	2.0237e-13	584	9202	1287	26539	protein binding	AQU2.1.32744_001|AQU2.1.40617_001|AQU2.1.27926_001|AQU2.1.16079_001|AQU2.1.30507_001|AQU2.1.21091_001|AQU2.1.21164_001|AQU2.1.41909_001|AQU2.1.42749_001|AQU2.1.43880_001|AQU2.1.17034_001|AQU2.1.43775_001|AQU2.1.29020_001|AQU2.1.37262_001|AQU2.1.35033_001|AQU2.1.38821_001|AQU2.1.43945_001|AQU2.1.37940_001|AQU2.1.23725_001|AQU2.1.29423_001|AQU2.1.31653_001|AQU2.1.18504_001|AQU2.1.28177_001|AQU2.1.2…
4872	7.1925e-07	0.00018748	96	1191	1287	26539	receptor activity	AQU2.1.30168_001|AQU2.1.26862_001|AQU2.1.15859_001|AQU2.1.41978_001|AQU2.1.25014_001|AQU2.1.21091_001|AQU2.1.12842_001|AQU2.1.25677_001|AQU2.1.35973_001|AQU2.1.07251_001|AQU2.1.27374_001|AQU2.1.19530_001|AQU2.1.38131_001|AQU2.1.43810_001|AQU2.1.43908_001|AQU2.1.27236_001|AQU2.1.25210_001|AQU2.1.40350_001|AQU2.1.37655_001|AQU2.1.33904_001|AQU2.1.34435_001|AQU2.1.41783_001|AQU2.1.42625_001|AQU2.1.3…
60089	7.9779e-07	0.00018748	103	1307	1287	26539	molecular transducer activity	AQU2.1.15859_001|AQU2.1.41978_001|AQU2.1.25014_001|AQU2.1.21091_001|AQU2.1.12842_001|AQU2.1.25677_001|AQU2.1.35973_001|AQU2.1.19530_001|AQU2.1.25210_001|AQU2.1.37655_001|AQU2.1.33904_001|AQU2.1.18085_001|AQU2.1.41783_001|AQU2.1.42625_001|AQU2.1.38821_001|AQU2.1.44682_001|AQU2.1.31101_001|AQU2.1.14263_001|AQU2.1.38661_001|AQU2.1.41374_001|AQU2.1.28814_001|AQU2.1.39606_001|AQU2.1.28083_001|AQU2.1.1…
5509	2.1275e-05	0.0034772	55	631	1287	26539	calcium ion binding	AQU2.1.18302_001|AQU2.1.28447_001|AQU2.1.41163_001|AQU2.1.28189_001|AQU2.1.11443_001|AQU2.1.35972_001|AQU2.1.21235_001|AQU2.1.34371_001|AQU2.1.25129_001|AQU2.1.23006_001|AQU2.1.24170_001|AQU2.1.17524_001|AQU2.1.35974_001|AQU2.1.40350_001|AQU2.1.32117_001|AQU2.1.21723_001|AQU2.1.41783_001|AQU2.1.37678_001|AQU2.1.21357_001|AQU2.1.26967_001|AQU2.1.26016_001|AQU2.1.25130_001|AQU2.1.37297_001|AQU2.1.3…
1990837	2.4661e-05	0.0034772	10	42	1287	26539	sequence-specific double-stranded DNA binding	AQU2.1.30282_001|AQU2.1.41133_001|AQU2.1.43775_001|AQU2.1.40618_001|AQU2.1.42527_001|AQU2.1.41209_001|AQU2.1.07466_001|AQU2.1.40621_001|AQU2.1.40608_001|AQU2.1.27488_001
976	3.2427e-05	0.0038102	9	35	1287	26539	transcription regulatory region sequence-specific DNA binding	AQU2.1.30282_001|AQU2.1.41133_001|AQU2.1.43775_001|AQU2.1.40618_001|AQU2.1.41209_001|AQU2.1.07466_001|AQU2.1.40621_001|AQU2.1.40608_001|AQU2.1.27488_001
3690	8.113e-05	0.008171	12	67	1287	26539	double-stranded DNA binding	AQU2.1.30282_001|AQU2.1.41133_001|AQU2.1.32690_001|AQU2.1.43775_001|AQU2.1.40618_001|AQU2.1.42527_001|AQU2.1.41209_001|AQU2.1.39773_001|AQU2.1.07466_001|AQU2.1.40621_001|AQU2.1.40608_001|AQU2.1.27488_001
5543	0.00010044	0.0088516	30	293	1287	26539	phospholipid binding	AQU2.1.27417_001|AQU2.1.41019_001|AQU2.1.37518_001|AQU2.1.43918_001|AQU2.1.23893_001|AQU2.1.37575_001|AQU2.1.28284_001|AQU2.1.35271_001|AQU2.1.32117_001|AQU2.1.31842_001|AQU2.1.40748_001|AQU2.1.43945_001|AQU2.1.25318_001|AQU2.1.38707_001|AQU2.1.33525_001|AQU2.1.23313_001|AQU2.1.43559_001|AQU2.1.30582_001|AQU2.1.41498_001|AQU2.1.41500_001|AQU2.1.15261_001|AQU2.1.28198_001|AQU2.1.37578_001|AQU2.1.2…
Biological Process
GO-ID	p-value	corr p-value	x	n	X	N	Description	Genes in test set
32502	8.9843e-08	0.00019676	122	1558	971	19944	developmental process	AQU2.1.30282_001|AQU2.1.43951_001|AQU2.1.40617_001|AQU2.1.26340_001|AQU2.1.33930_001|AQU2.1.41749_001|AQU2.1.41978_001|AQU2.1.30507_001|AQU2.1.25014_001|AQU2.1.21091_001|AQU2.1.37629_001|AQU2.1.25677_001|AQU2.1.34371_001|AQU2.1.33460_001|AQU2.1.29995_001|AQU2.1.29020_001|AQU2.1.41376_001|AQU2.1.41580_001|AQU2.1.31673_001|AQU2.1.25405_001|AQU2.1.27881_001|AQU2.1.26405_001|AQU2.1.34195_001|AQU2.1.1…
32501	1.6602e-07	0.00019676	126	1642	971	19944	multicellular organismal process	AQU2.1.30282_001|AQU2.1.43951_001|AQU2.1.40617_001|AQU2.1.26340_001|AQU2.1.33930_001|AQU2.1.41749_001|AQU2.1.41978_001|AQU2.1.30507_001|AQU2.1.37442_001|AQU2.1.25014_001|AQU2.1.21091_001|AQU2.1.37629_001|AQU2.1.25677_001|AQU2.1.34371_001|AQU2.1.25685_001|AQU2.1.33460_001|AQU2.1.29995_001|AQU2.1.29020_001|AQU2.1.41376_001|AQU2.1.41580_001|AQU2.1.31673_001|AQU2.1.25405_001|AQU2.1.27881_001|AQU2.1.2…
44707	2.0617e-07	0.00019676	120	1549	971	19944	single-multicellular organism process	AQU2.1.30282_001|AQU2.1.43951_001|AQU2.1.40617_001|AQU2.1.26340_001|AQU2.1.33930_001|AQU2.1.41749_001|AQU2.1.41978_001|AQU2.1.30507_001|AQU2.1.37442_001|AQU2.1.25014_001|AQU2.1.21091_001|AQU2.1.37629_001|AQU2.1.25677_001|AQU2.1.34371_001|AQU2.1.25685_001|AQU2.1.33460_001|AQU2.1.29995_001|AQU2.1.29020_001|AQU2.1.41376_001|AQU2.1.41580_001|AQU2.1.31673_001|AQU2.1.25405_001|AQU2.1.27881_001|AQU2.1.2…
6810	4.6321e-07	0.00033155	163	2307	971	19944	transport	AQU2.1.17409_001|AQU2.1.40617_001|AQU2.1.33930_001|AQU2.1.41978_001|AQU2.1.30507_001|AQU2.1.34371_001|AQU2.1.38408_001|AQU2.1.26006_001|AQU2.1.39183_001|AQU2.1.19532_001|AQU2.1.16567_001|AQU2.1.24660_001|AQU2.1.29020_001|AQU2.1.34418_001|AQU2.1.30292_001|AQU2.1.29219_001|AQU2.1.16771_001|AQU2.1.25405_001|AQU2.1.18877_001|AQU2.1.24470_001|AQU2.1.37899_001|AQU2.1.22047_001|AQU2.1.43945_001|AQU2.1.3…
44767	5.905e-07	0.00033552	116	1514	971	19944	single-organism developmental process	AQU2.1.30282_001|AQU2.1.43951_001|AQU2.1.40617_001|AQU2.1.26340_001|AQU2.1.33930_001|AQU2.1.41749_001|AQU2.1.41978_001|AQU2.1.30507_001|AQU2.1.25014_001|AQU2.1.21091_001|AQU2.1.37629_001|AQU2.1.25677_001|AQU2.1.33460_001|AQU2.1.29995_001|AQU2.1.29020_001|AQU2.1.41376_001|AQU2.1.41580_001|AQU2.1.31673_001|AQU2.1.25405_001|AQU2.1.27881_001|AQU2.1.26405_001|AQU2.1.34195_001|AQU2.1.19237_001|AQU2.1.3…
51234	7.0315e-07	0.00033552	164	2340	971	19944	establishment of localization	AQU2.1.17409_001|AQU2.1.40617_001|AQU2.1.33930_001|AQU2.1.41978_001|AQU2.1.30507_001|AQU2.1.34371_001|AQU2.1.38408_001|AQU2.1.26006_001|AQU2.1.39183_001|AQU2.1.19532_001|AQU2.1.16567_001|AQU2.1.24660_001|AQU2.1.29020_001|AQU2.1.34418_001|AQU2.1.30292_001|AQU2.1.29219_001|AQU2.1.16771_001|AQU2.1.25405_001|AQU2.1.18877_001|AQU2.1.24470_001|AQU2.1.37899_001|AQU2.1.22047_001|AQU2.1.43945_001|AQU2.1.3…
51179	8.6469e-07	0.00035366	177	2577	971	19944	localization	AQU2.1.30282_001|AQU2.1.17409_001|AQU2.1.40617_001|AQU2.1.33930_001|AQU2.1.41978_001|AQU2.1.30507_001|AQU2.1.34371_001|AQU2.1.38408_001|AQU2.1.26006_001|AQU2.1.39183_001|AQU2.1.19532_001|AQU2.1.16567_001|AQU2.1.24660_001|AQU2.1.29020_001|AQU2.1.34418_001|AQU2.1.30292_001|AQU2.1.29219_001|AQU2.1.16771_001|AQU2.1.25405_001|AQU2.1.18877_001|AQU2.1.24470_001|AQU2.1.37899_001|AQU2.1.22047_001|AQU2.1.4…
7275	1.6348e-06	0.00058505	102	1313	971	19944	multicellular organismal development	AQU2.1.30282_001|AQU2.1.43951_001|AQU2.1.40617_001|AQU2.1.26340_001|AQU2.1.33930_001|AQU2.1.41749_001|AQU2.1.41978_001|AQU2.1.30507_001|AQU2.1.25014_001|AQU2.1.21091_001|AQU2.1.37629_001|AQU2.1.25677_001|AQU2.1.33460_001|AQU2.1.29995_001|AQU2.1.29020_001|AQU2.1.41376_001|AQU2.1.41580_001|AQU2.1.31673_001|AQU2.1.25405_001|AQU2.1.27881_001|AQU2.1.26405_001|AQU2.1.34195_001|AQU2.1.19237_001|AQU2.1.3…
48856	1.236e-05	0.0036969	101	1359	971	19944	anatomical structure development	AQU2.1.30282_001|AQU2.1.26340_001|AQU2.1.33930_001|AQU2.1.41749_001|AQU2.1.41978_001|AQU2.1.30507_001|AQU2.1.25014_001|AQU2.1.21091_001|AQU2.1.37629_001|AQU2.1.34371_001|AQU2.1.33460_001|AQU2.1.29020_001|AQU2.1.41376_001|AQU2.1.41580_001|AQU2.1.31673_001|AQU2.1.25405_001|AQU2.1.27881_001|AQU2.1.26405_001|AQU2.1.34195_001|AQU2.1.19237_001|AQU2.1.32932_001|AQU2.1.37297_001|AQU2.1.30170_001|AQU2.1.4…
6909	1.5401e-05	0.0036969	12	57	971	19944	phagocytosis	AQU2.1.42693_001|AQU2.1.43945_001|AQU2.1.41978_001|AQU2.1.17841_001|AQU2.1.29020_001|AQU2.1.28714_001|AQU2.1.17840_001|AQU2.1.38670_001|AQU2.1.41892_001|AQU2.1.42000_001|AQU2.1.30288_001|AQU2.1.38381_001
50789	1.5536e-05	0.0036969	367	6302	971	19944	regulation of biological process	AQU2.1.40617_001|AQU2.1.26340_001|AQU2.1.09862_001|AQU2.1.15859_001|AQU2.1.24545_001|AQU2.1.16672_001|AQU2.1.30507_001|AQU2.1.21091_001|AQU2.1.37629_001|AQU2.1.33460_001|AQU2.1.21431_001|AQU2.1.16567_001|AQU2.1.25210_001|AQU2.1.29373_001|AQU2.1.43775_001|AQU2.1.39134_001|AQU2.1.27881_001|AQU2.1.31487_001|AQU2.1.26405_001|AQU2.1.42625_001|AQU2.1.37262_001|AQU2.1.35033_001|AQU2.1.27423_001|AQU2.1.3…
7218	1.5666e-05	0.0036969	17	107	971	19944	neuropeptide signaling pathway	AQU2.1.38821_001|AQU2.1.30168_001|AQU2.1.22161_001|AQU2.1.34080_001|AQU2.1.27151_001|AQU2.1.42563_001|AQU2.1.38404_001|AQU2.1.28045_001|AQU2.1.36490_001|AQU2.1.39653_001|AQU2.1.25210_001|AQU2.1.28798_001|AQU2.1.40350_001|AQU2.1.43876_001|AQU2.1.36039_001|AQU2.1.36489_001|AQU2.1.28801_001
44765	1.6786e-05	0.0036969	121	1711	971	19944	single-organism transport	AQU2.1.17409_001|AQU2.1.40617_001|AQU2.1.41978_001|AQU2.1.30507_001|AQU2.1.34371_001|AQU2.1.38408_001|AQU2.1.26006_001|AQU2.1.39183_001|AQU2.1.19532_001|AQU2.1.24660_001|AQU2.1.29020_001|AQU2.1.34418_001|AQU2.1.30292_001|AQU2.1.29219_001|AQU2.1.16771_001|AQU2.1.25405_001|AQU2.1.24470_001|AQU2.1.22047_001|AQU2.1.43945_001|AQU2.1.32932_001|AQU2.1.32959_001|AQU2.1.40211_001|AQU2.1.32118_001|AQU2.1.4…
