# Supplementary material for: Landscape of histone modifications in a sponge reveals the origin of animal cis-regulatory complexity
Source: eLife. 2017 Apr 11;6:e22194. doi: 10.7554/eLife.22194 (PMC5429095; doi:10.7554/eLife.22194)
Supplement: Figure 7—source data 1. — DOI: http://dx.doi.org/10.7554/eLife.22194.040 [file elife-22194-fig7-data1.xlsx]

## Sheet: Figure 7-Source Data 1
Figure 7-source data 1. 60 microsyntenic units representing functional gene linkages and presence-absence of chromatin states containing typical eumetazoan enhancer hPTM patterns (‘EnhP’, ’EnhWk’, ’TxEnhA’) (adult only) and/or in silico predicted enhancer-like elements (both larva and adult).
			Adult only				Adult & Larva
Human gene pairs	Sponge gene pairs		EnhP	EnhW	TxEnhA		Predicted enhancer-like elements
HSPD1-HSPE1	Aqu2.1.33574_001		•	•				both adult and larva
HSPD1-HSPE1	Aqu2.1.33572_001							only larva
								only adult
ISL2-SCAPER	Aqu2.1.44335_001				•		•
ISL2-SCAPER	Aqu2.1.44336_001
MAP3K9-PCNX	Aqu2.1.16007_001				•		•
MAP3K9-PCNX	Aqu2.1.16008_001
IFT20-TNFAIP1	Aqu2.1.27188_001				•		•
IFT20-TNFAIP1	Aqu2.1.27190_001
HMGB2-SAP30	Aqu2.1.41303_001
HMGB2-SAP30	Aqu2.1.41302_001
RPL3L-NDUFB10	Aqu2.1.43382_001				•
RPL3L-NDUFB10	Aqu2.1.43381_001
HDDC2-HEY2	Aqu2.1.28677_001				•		•
HDDC2-HEY2	Aqu2.1.28679_001
STYXL1-MDH2	Aqu2.1.29863_001
STYXL1-MDH2	Aqu2.1.29864_001
DNAJC30-WBSCR22	Aqu2.1.39884_001				•
DNAJC30-WBSCR22	Aqu2.1.39888_001
CNIH-GMFB	Aqu2.1.40828_001
CNIH-GMFB	Aqu2.1.40827_001
OLA1-SP9	Aqu2.1.26965_001				•		•
OLA1-SP9	Aqu2.1.26964_001
SAR1B-SEC24A	Aqu2.1.22422_001		•	•
SAR1B-SEC24A	Aqu2.1.22423_001
SAR1B-SEC24A	Aqu2.1.08639_001
SAR1B-SEC24A	Aqu2.1.08640_001				•
FAM183A-EBNA1BP2	Aqu2.1.25179_001
FAM183A-EBNA1BP2	Aqu2.1.25178_001
LSMD1-CYB5D1	Aqu2.1.36201_001
LSMD1-CYB5D1	Aqu2.1.36202_001
ARMC1-MTFR1	Aqu2.1.30862_001						•
ARMC1-MTFR1	Aqu2.1.30863_001
C6orf35-ZDHHC14	Aqu2.1.33078_001		•	•	•
C6orf35-ZDHHC14	Aqu2.1.33088_001
MED22-RPL7A	Aqu2.1.29989_001				•		•
MED22-RPL7A	Aqu2.1.29988_001
HNRNPU-EFCAB2	Aqu2.1.34603_001		•	•	•		•
HNRNPU-EFCAB2	Aqu2.1.34601_001
CCDC104-SMEK2	Aqu2.1.38335_001
CCDC104-SMEK2	Aqu2.1.38337_001
APC-SRP19	Aqu2.1.40227_001				•		•
APC-SRP19	Aqu2.1.40225_001
SYAP1-CXorf15	Aqu2.1.14868_001				•
SYAP1-CXorf15	Aqu2.1.14867_001
RAB30-PCF11	Aqu2.1.25867_001		•	•	•		•
RAB30-PCF11	Aqu2.1.25869_001
C1orf84-KIAA0467	Aqu2.1.28702_001		•	•	•		•
C1orf84-KIAA0467	Aqu2.1.28698_001
PCNA-CDS2	Aqu2.1.41035_001
PCNA-CDS2	Aqu2.1.41036_001
TFAP4-GLIS2	Aqu2.1.30487_001				•		•
TFAP4-GLIS2	Aqu2.1.30486_001
CCNE1-C19orf2	Aqu2.1.25304_001				•		•
CCNE1-C19orf2	Aqu2.1.25303_001
PDAP1-BUD31	Aqu2.1.28090_001				•		•
PDAP1-BUD31	Aqu2.1.28093_001
C12orf49-RNFT2	Aqu2.1.34392_001				•
C12orf49-RNFT2	Aqu2.1.34393_001
DSCC1-DEPDC6	Aqu2.1.26630_001		•	•
DSCC1-DEPDC6	Aqu2.1.26633_001
SOD1-SFRS15	Aqu2.1.23369_001				•
SOD1-SFRS15	Aqu2.1.23365_001
DTWD2-DMXL1	Aqu2.1.37809_001				•		•
DTWD2-DMXL1	Aqu2.1.37805_001
EIF1AD-BANF1	Aqu2.1.37121_001
EIF1AD-BANF1	Aqu2.1.37119_001
RBM24-CAP2	Aqu2.1.24982_001				•		•
RBM24-CAP2	Aqu2.1.24981_001
SYNGR3-ZNF598	Aqu2.1.30849_001				•
SYNGR3-ZNF598	Aqu2.1.30850_001
CPEB3-MARCH5	Aqu2.1.41918_001				•
CPEB3-MARCH5	Aqu2.1.41920_001
DNAJC1-MLLT10	Aqu2.1.43720_001				•		•
DNAJC1-MLLT10	Aqu2.1.43719_001
POLR1D-VAMP7	Aqu2.1.41160_001
POLR1D-VAMP7	Aqu2.1.41159_001
GINS4-PPP1R3B	Aqu2.1.41614_001				•
GINS4-PPP1R3B	Aqu2.1.41615_001
DECR2-IFT140	Aqu2.1.38486_001				•
DECR2-IFT140	Aqu2.1.38487_001
FAM183B-FZR1	Aqu2.1.25181_001				•		•
FAM183B-FZR1	Aqu2.1.25178_001
PLBD2-FAM109B	Aqu2.1.33656_001				•		•
PLBD2-FAM109B	Aqu2.1.33658_001
TK1-CCDC96	Aqu2.1.43278_001
TK1-CCDC96	Aqu2.1.43279_001
LPCAT2-DUS2L	Aqu2.1.34894_001				•
LPCAT2-DUS2L	Aqu2.1.34896_001
CLPTM1L-PDCD5	Aqu2.1.34912_001
CLPTM1L-PDCD5	Aqu2.1.34913_001
SNRPD2-FKBP2	Aqu2.1.44246_001
SNRPD2-FKBP2	Aqu2.1.44247_001
SNRPD1-CCDC113	Aqu2.1.21491_001
SNRPD1-CCDC113	Aqu2.1.21493_001
UNC119B-PHF12	Aqu2.1.36509_001				•		•
UNC119B-PHF12	Aqu2.1.36508_001
YIPF4-EXO1	Aqu2.1.34829_001				•		•
YIPF4-EXO1	Aqu2.1.34828_001
EDF1-PSMB1	Aqu2.1.34214_001
EDF1-PSMB1	Aqu2.1.34211_001
PSMB1-LSM2	Aqu2.1.34214_001
PSMB1-LSM2	Aqu2.1.34212_001
ADSS-NAA40	Aqu2.1.29120_001				•		•
ADSS-NAA40	Aqu2.1.29123_001
CPSF4-PDAP1	Aqu2.1.28092_001				•
CPSF4-PDAP1	Aqu2.1.28093_001
CALM2-C2orf61	Aqu2.1.37083_001
CALM2-C2orf61	Aqu2.1.37084_001
KLF3-TBC1D1	Aqu2.1.25740_001				•		•
KLF3-TBC1D1	Aqu2.1.25742_001
ARL2-SNX15	Aqu2.1.40835_001
ARL2-SNX15	Aqu2.1.40836_001
PRUNE-BNIPL	Aqu2.1.43361_001				•		•
PRUNE-BNIPL	Aqu2.1.43361_001
MYB-CCNE1	Aqu2.1.25307_001				•		•
MYB-CCNE1	Aqu2.1.25304_001
DIAPH3-TDRD3	Aqu2.1.32982_001				•		•
DIAPH3-TDRD3	Aqu2.1.32983_001
DUOXA1-DUOX1	Aqu2.1.39905_001				•
DUOXA1-DUOX1	Aqu2.1.39906_001
KIAA0892-GATAD2A	Aqu2.1.31350_001				•		•
KIAA0892-GATAD2A	Aqu2.1.31351_001
